# Supplementary material
Source: PubMed Central journal article supplement (PMC3700613)

L [ S ] [ A ] [ E ] y [ E ] K

A-kinase anchor protein 12 isoform 1 [Homo sapiens]

Charge State: +3

Scan Number: 4545

File Name: HJ050711\_GBMxeno\_bio1\_E\_HANNAH.raw

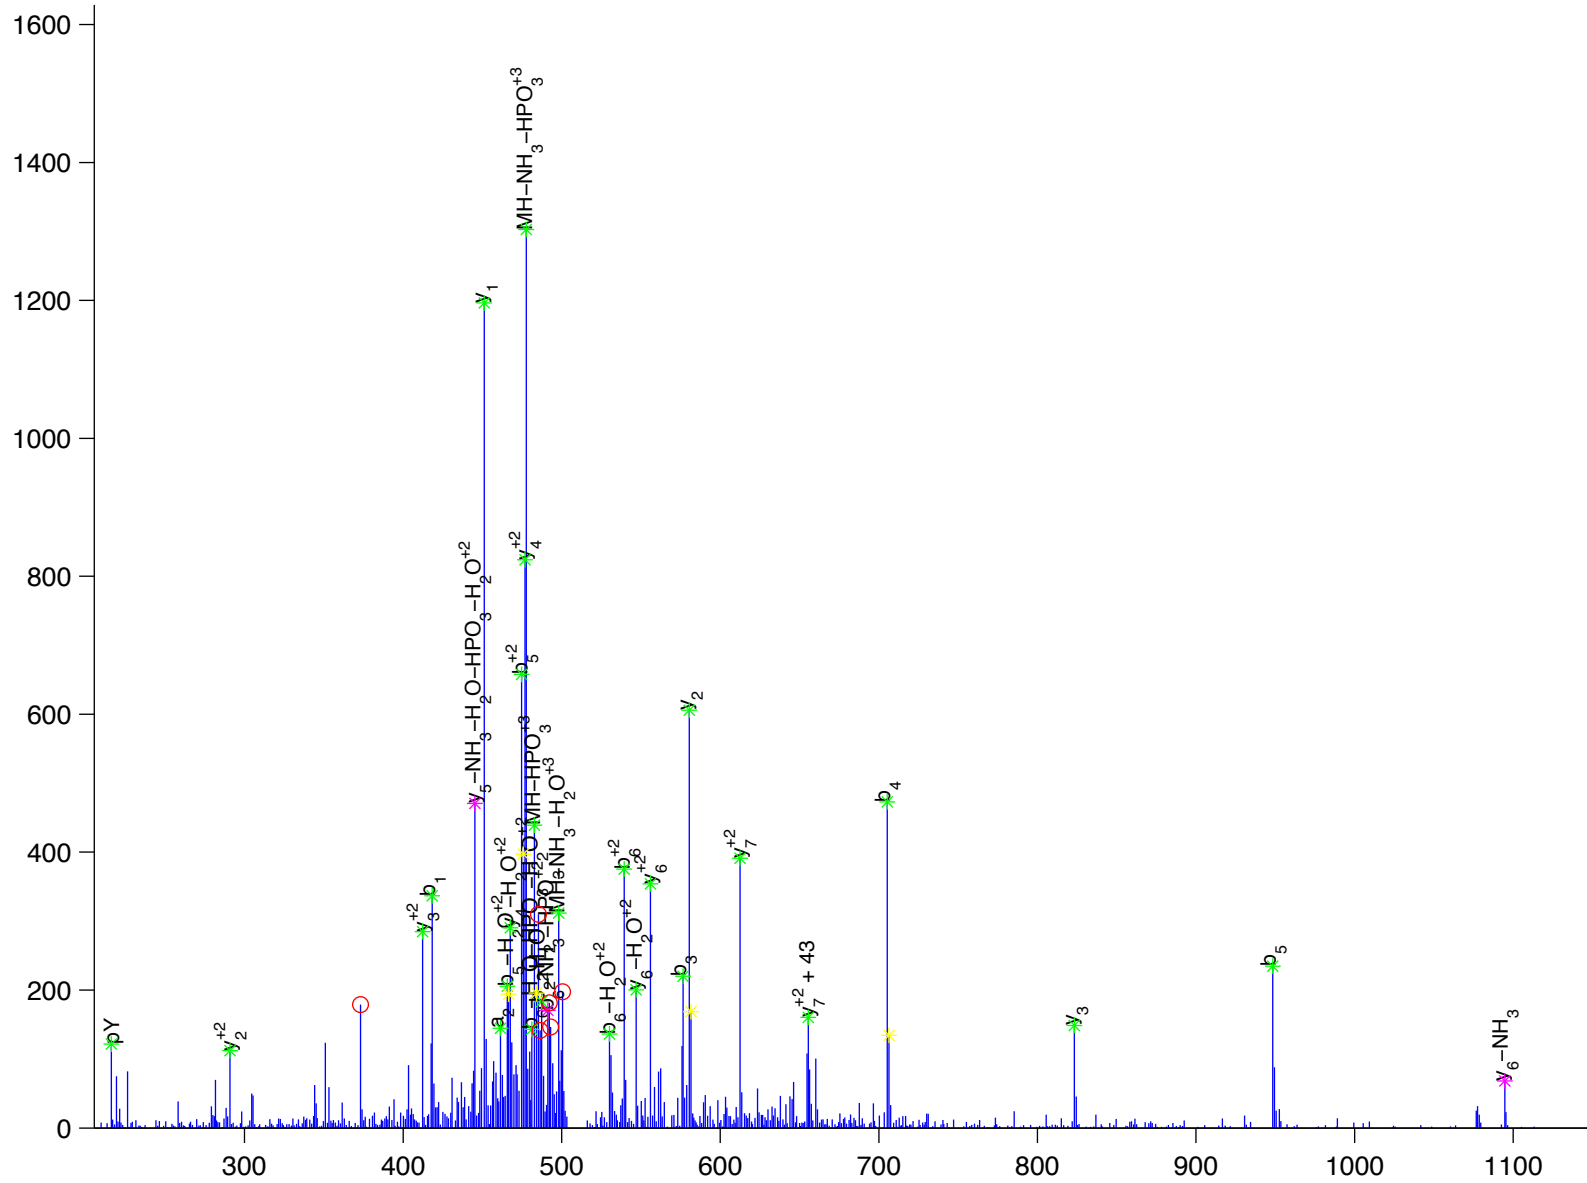

T L E P V R P P V V P N D y V P S P T R

abl interactor 2 [Homo sapiens]

Charge State: +3

Scan Number: 6712

File Name: HJ050711\_GBMxeno\_bio1\_E\_HANNAH.raw

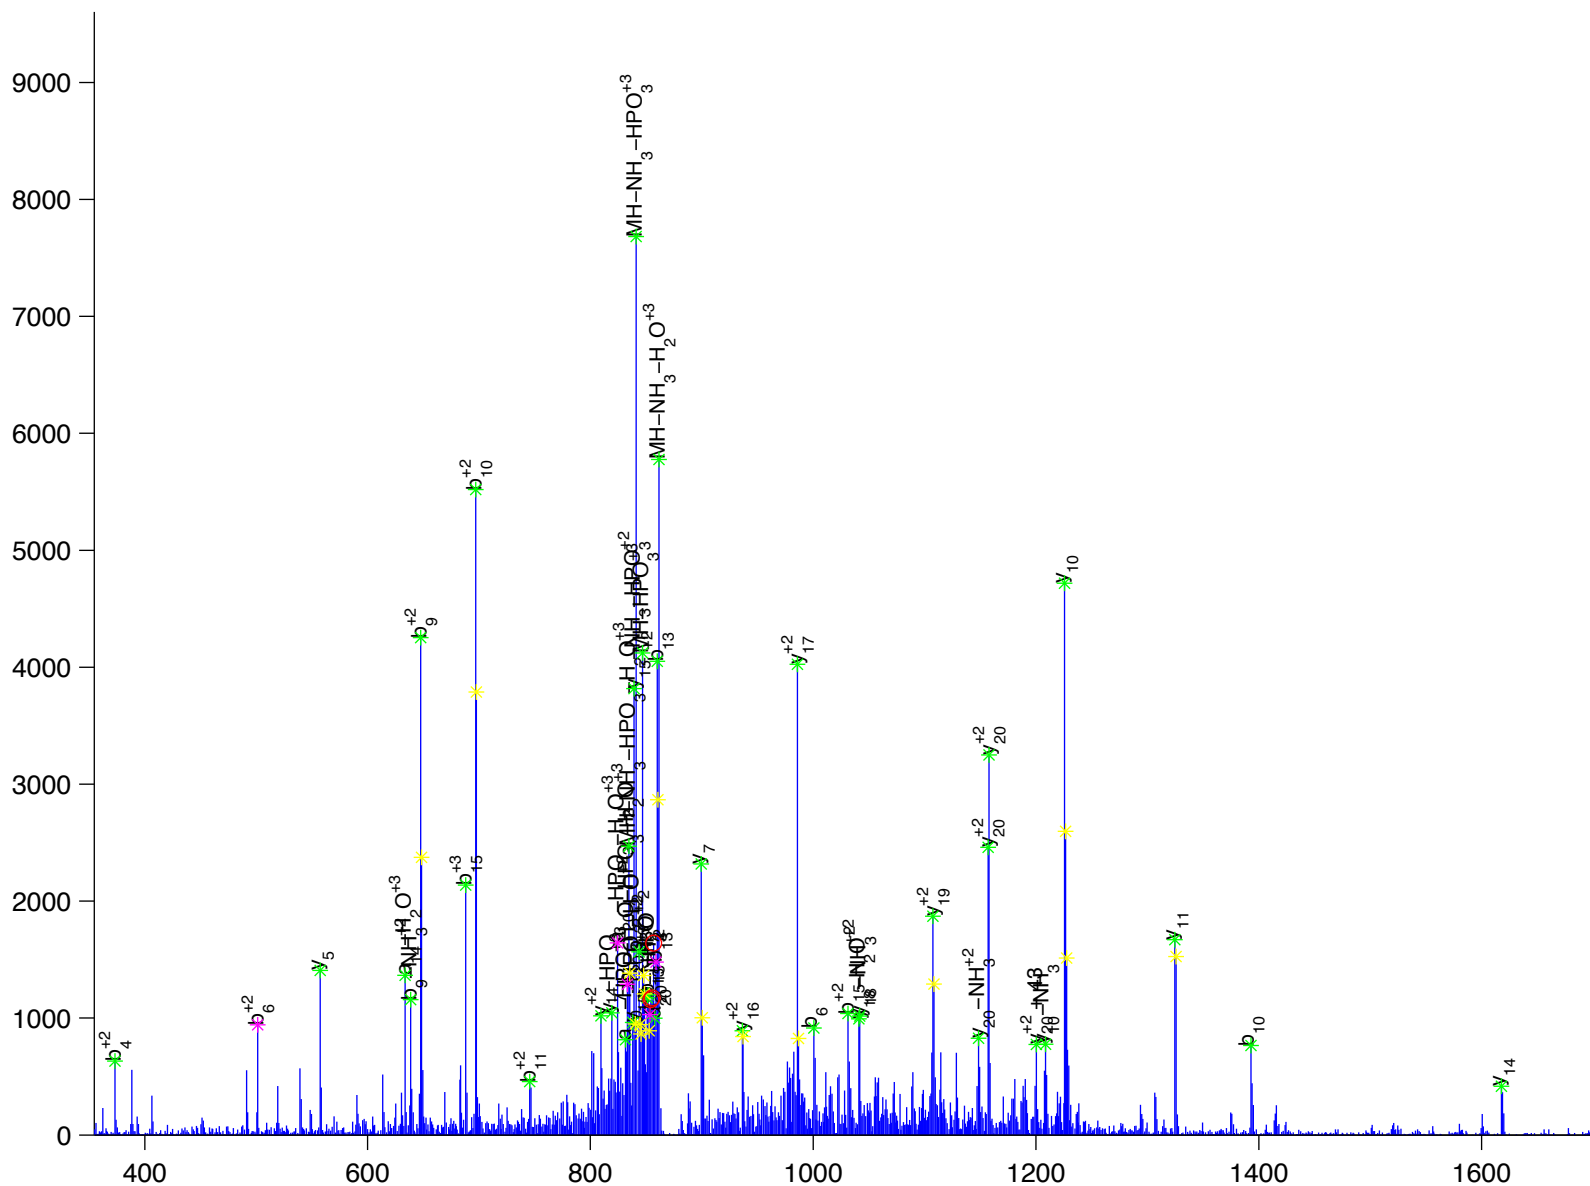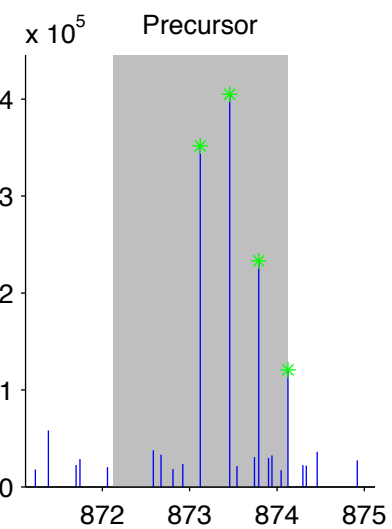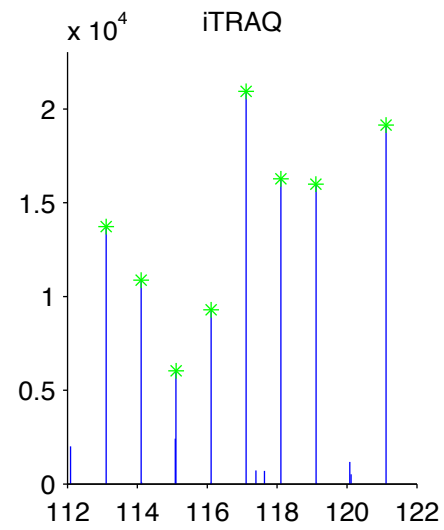

T L E P V K P P T V P N D y M T S P A R

abl-interactor 1 isoform a [Homo sapiens]

Charge State: +3

Scan Number: 6389

File Name: HJ050711\_GBMxeno\_bio1\_E\_HANNAH.raw

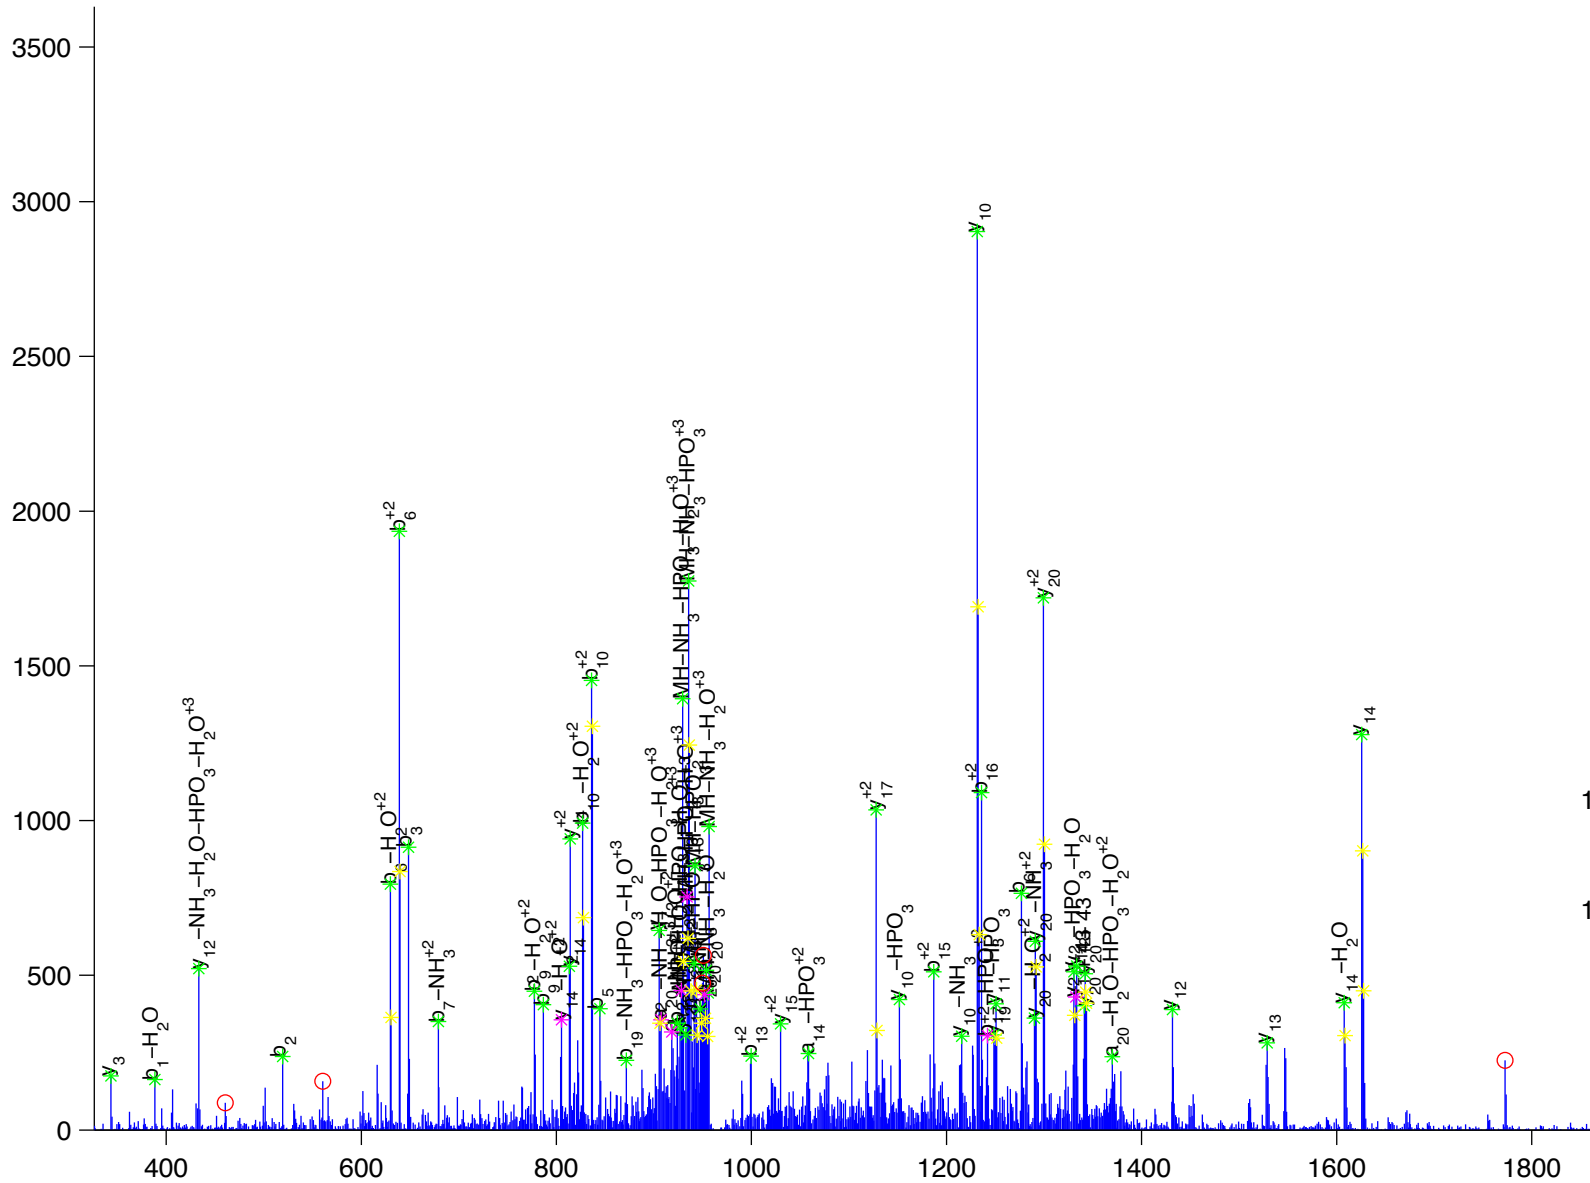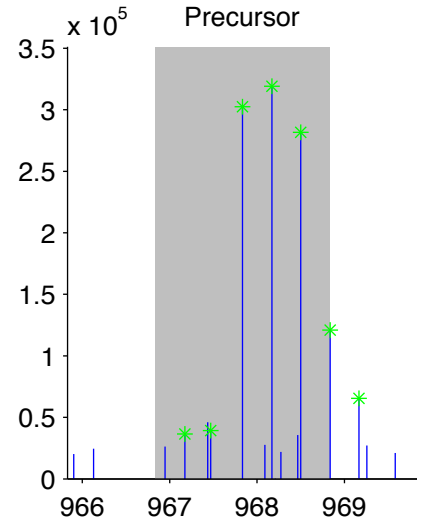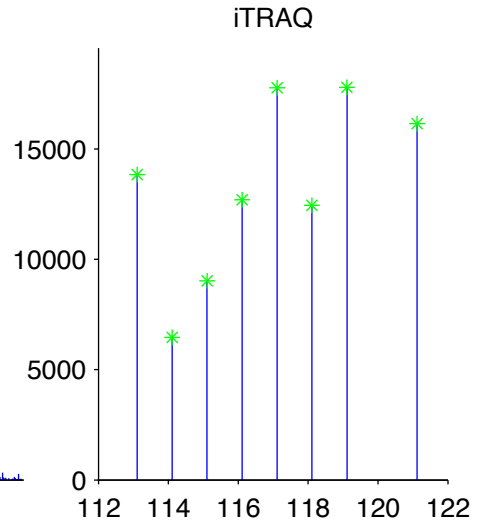

y [ L ] [ D ] [ I ] [ P ] K  
 [ [ [ [ [ [ [ [ ] ] ] ] ] ] ] ]

actinin, alpha 1 [Homo sapiens]

Charge State: +3

Scan Number: 6693

File Name: HJ050711\_GBMxeno\_bio1\_E\_HANNAH.raw

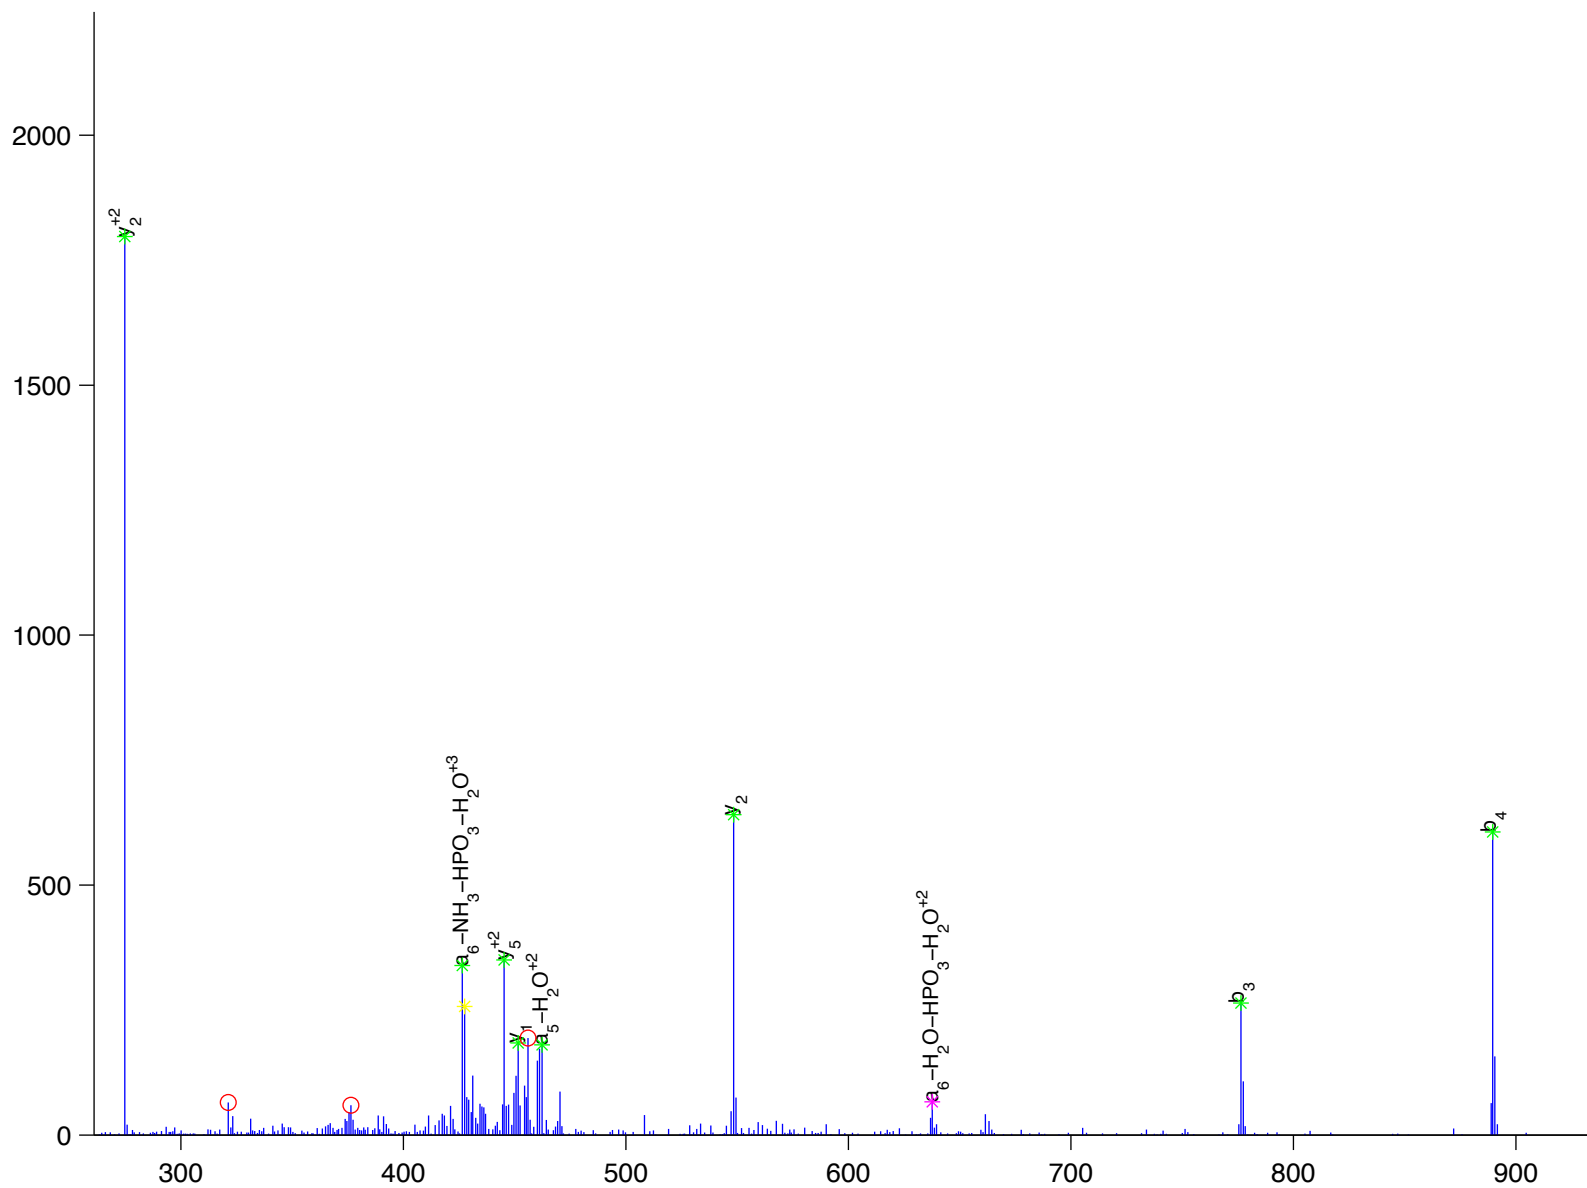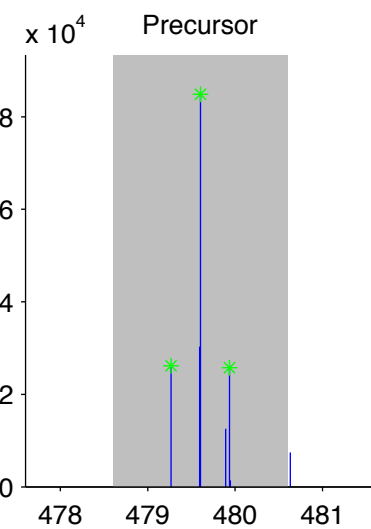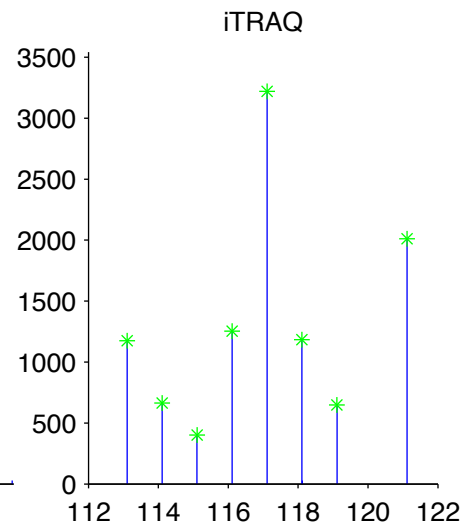

E[V]P[I]y[A]N]R

ADAM metallopeptidase domain 9 isoform 1 precursor [Homo sapiens]

Charge State: +2

Scan Number: 5085

File Name: HJ050711\_GBMxeno\_bio1\_E\_HANNAH.raw

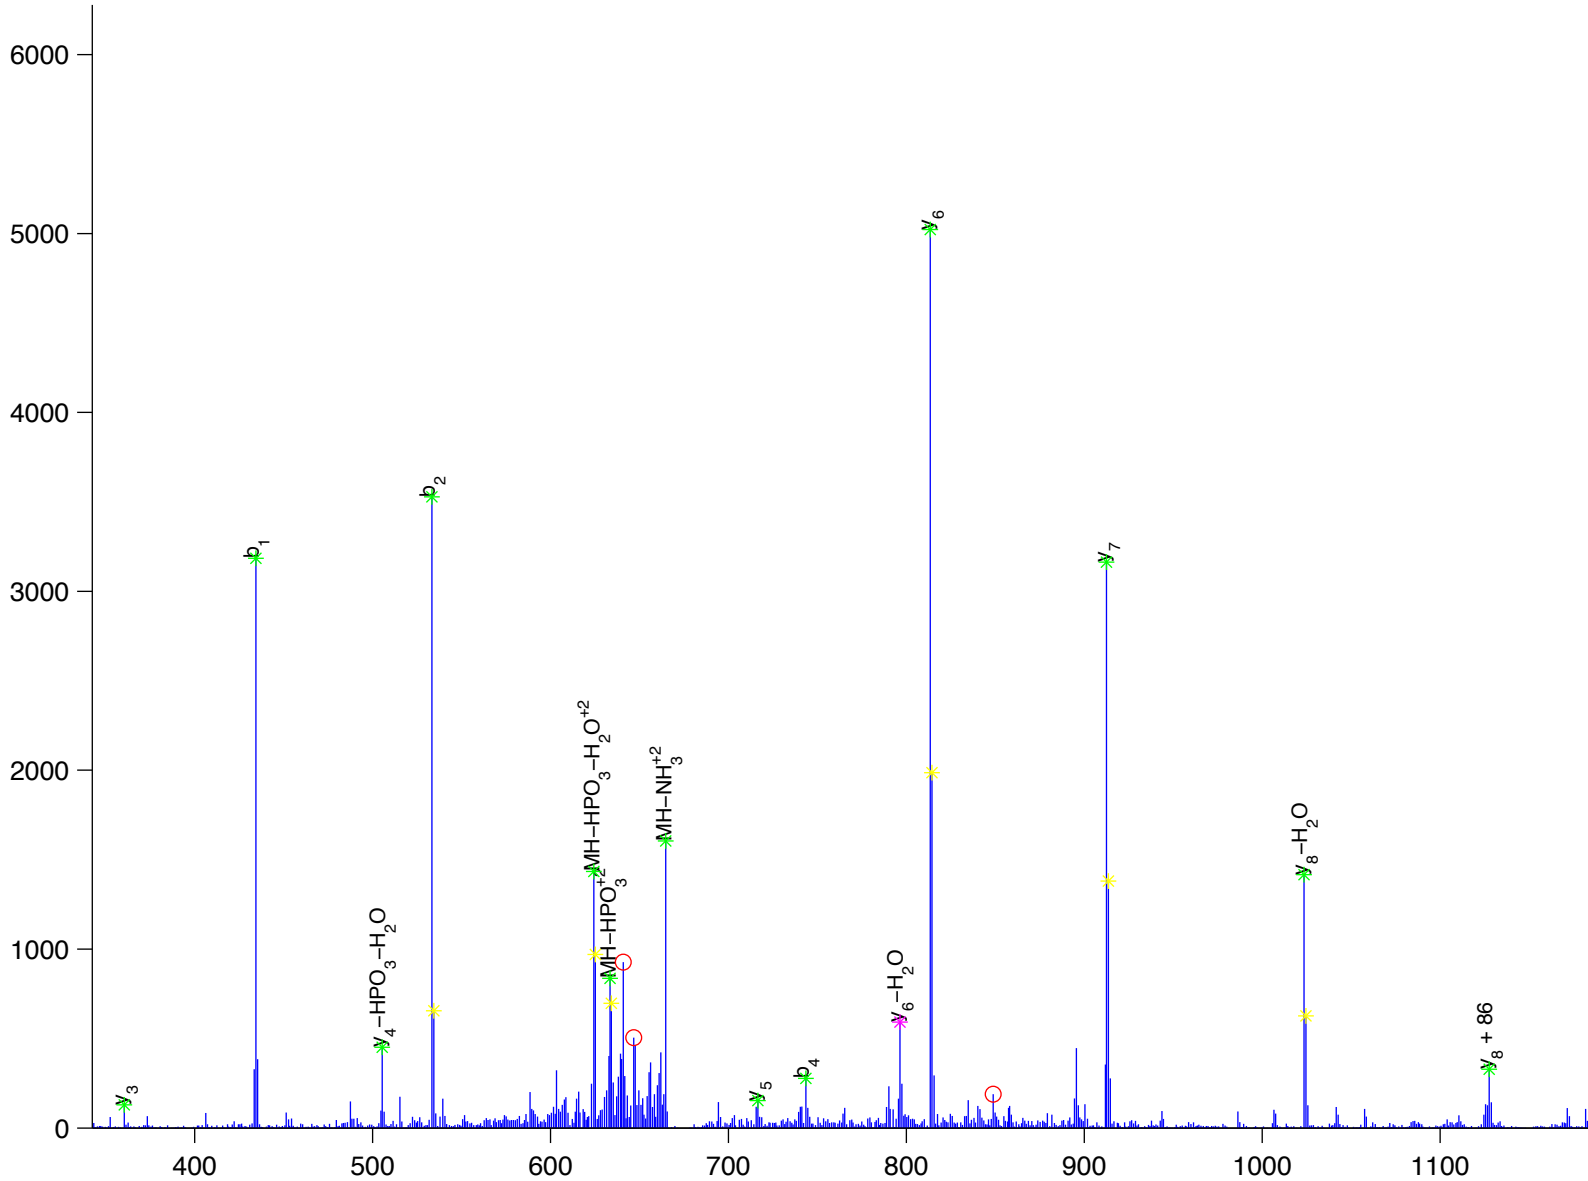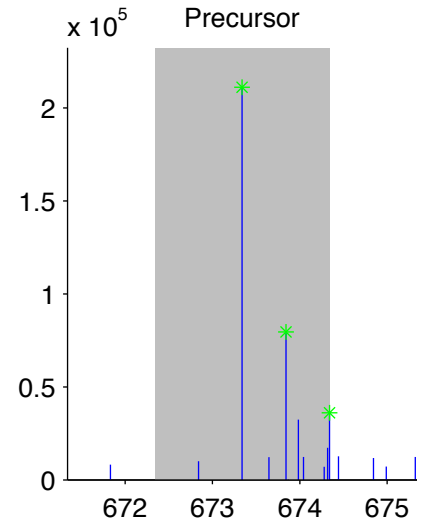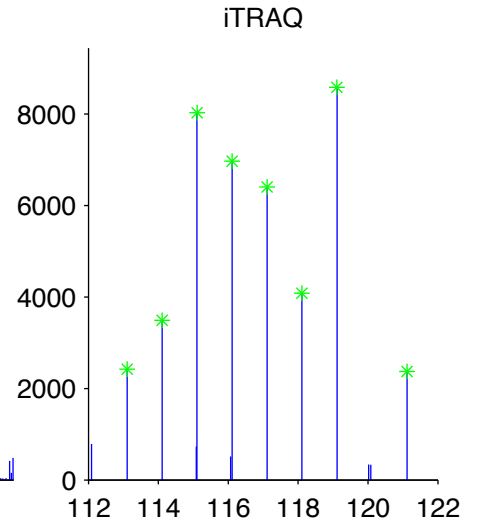

c [ Q ] y [ V ] T [ E ] K

aldolase A [Homo sapiens]

Charge State: +3

Scan Number: 3806

File Name: HJ050711\_GBMxeno\_bio1\_E\_HANNAH.raw

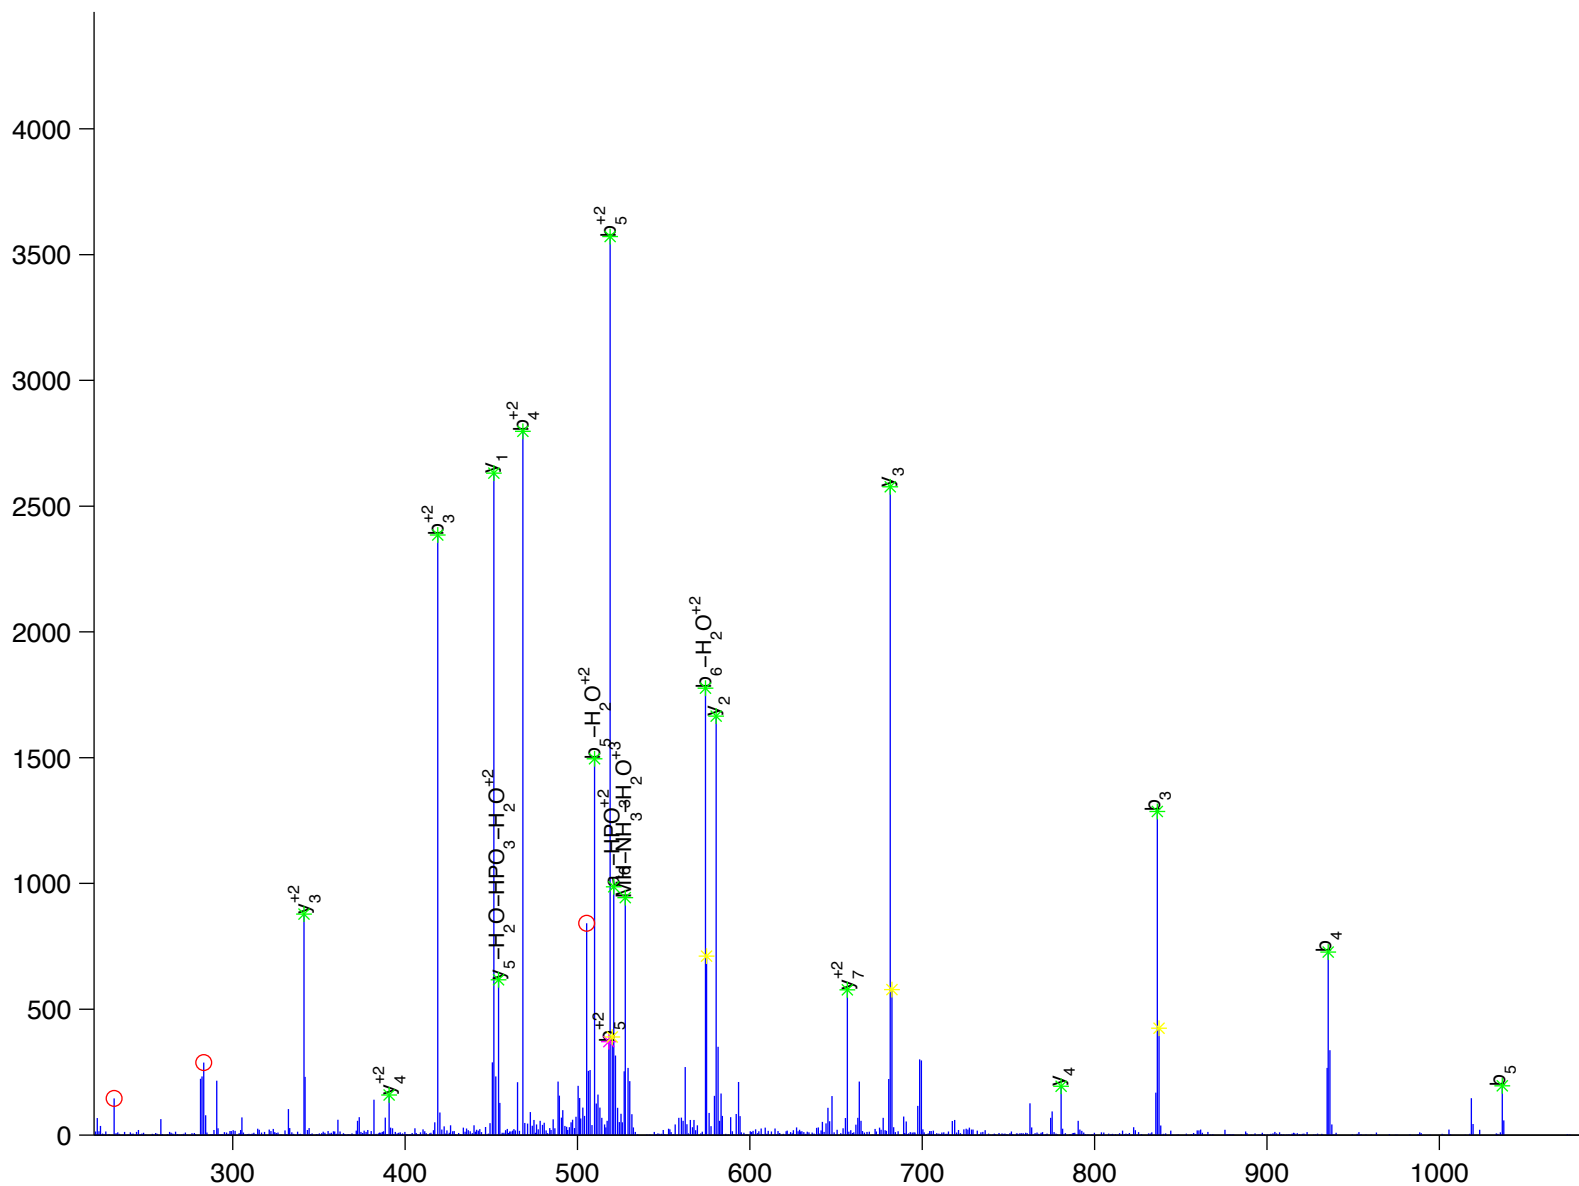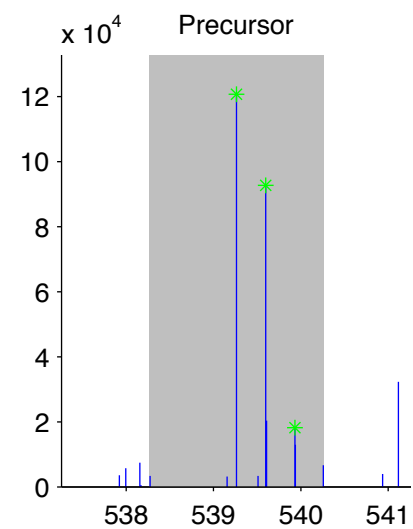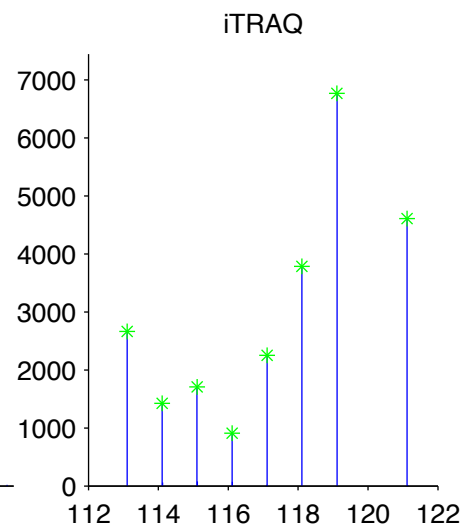

D [ S ] y [ V ] G [ D ] E [ A ] Q [ S ] K

alpha 1 actin precursor [Homo sapiens]

Charge State: +3

Scan Number: 3636

File Name: HJ050711\_GBMxeno\_bio1\_E\_HANNAH.raw

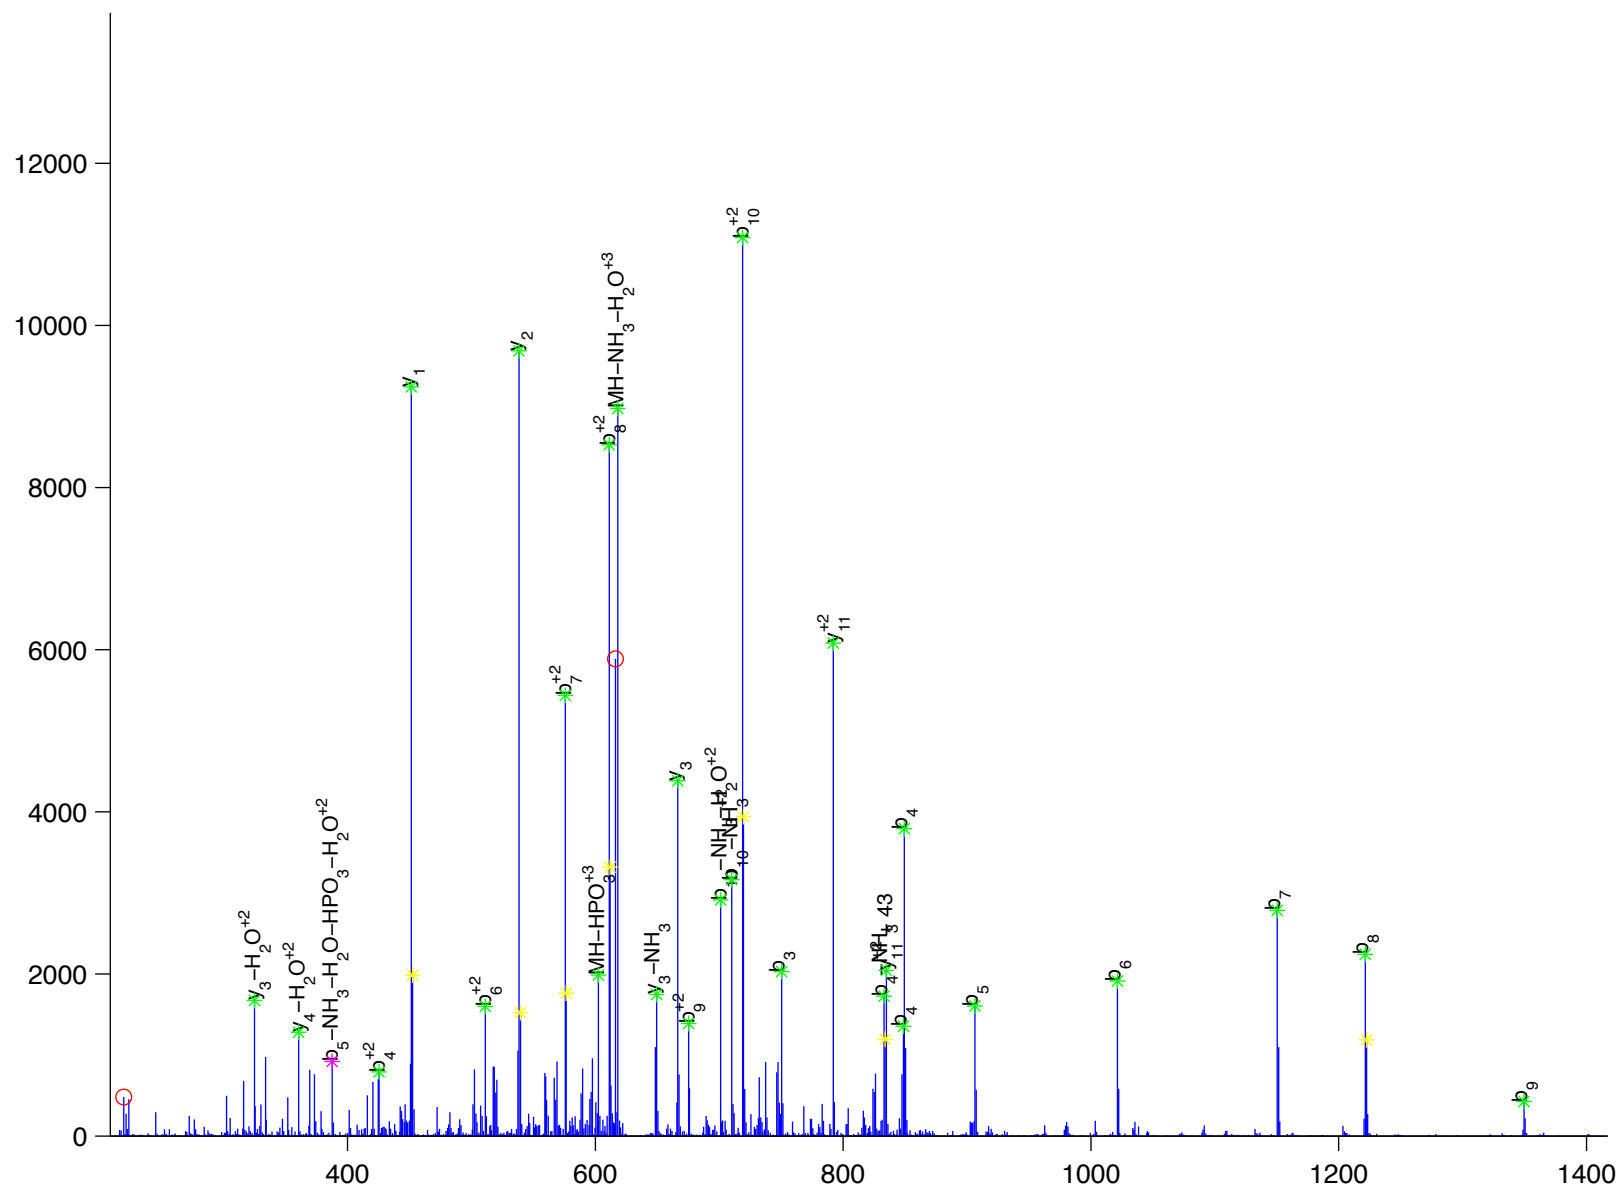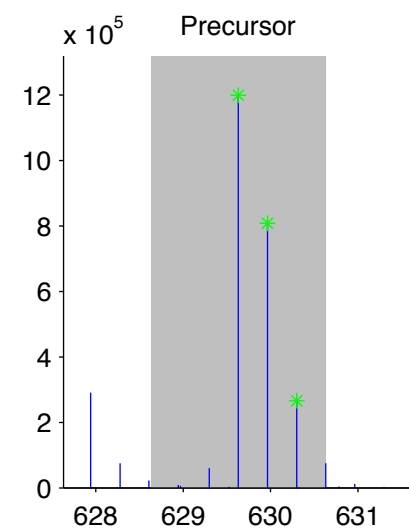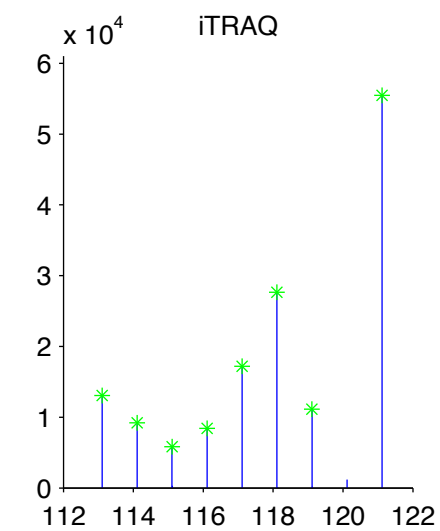

V [ G ] A [ H ] A [ G ] E [ y ] G [ A ] E [ A ] L [ E ] R

alpha 2 globin [Homo sapiens]

Charge State: +3

Scan Number: 5295

File Name: HJ050711\_GBMxeno\_bio1\_E\_HANNAH.raw

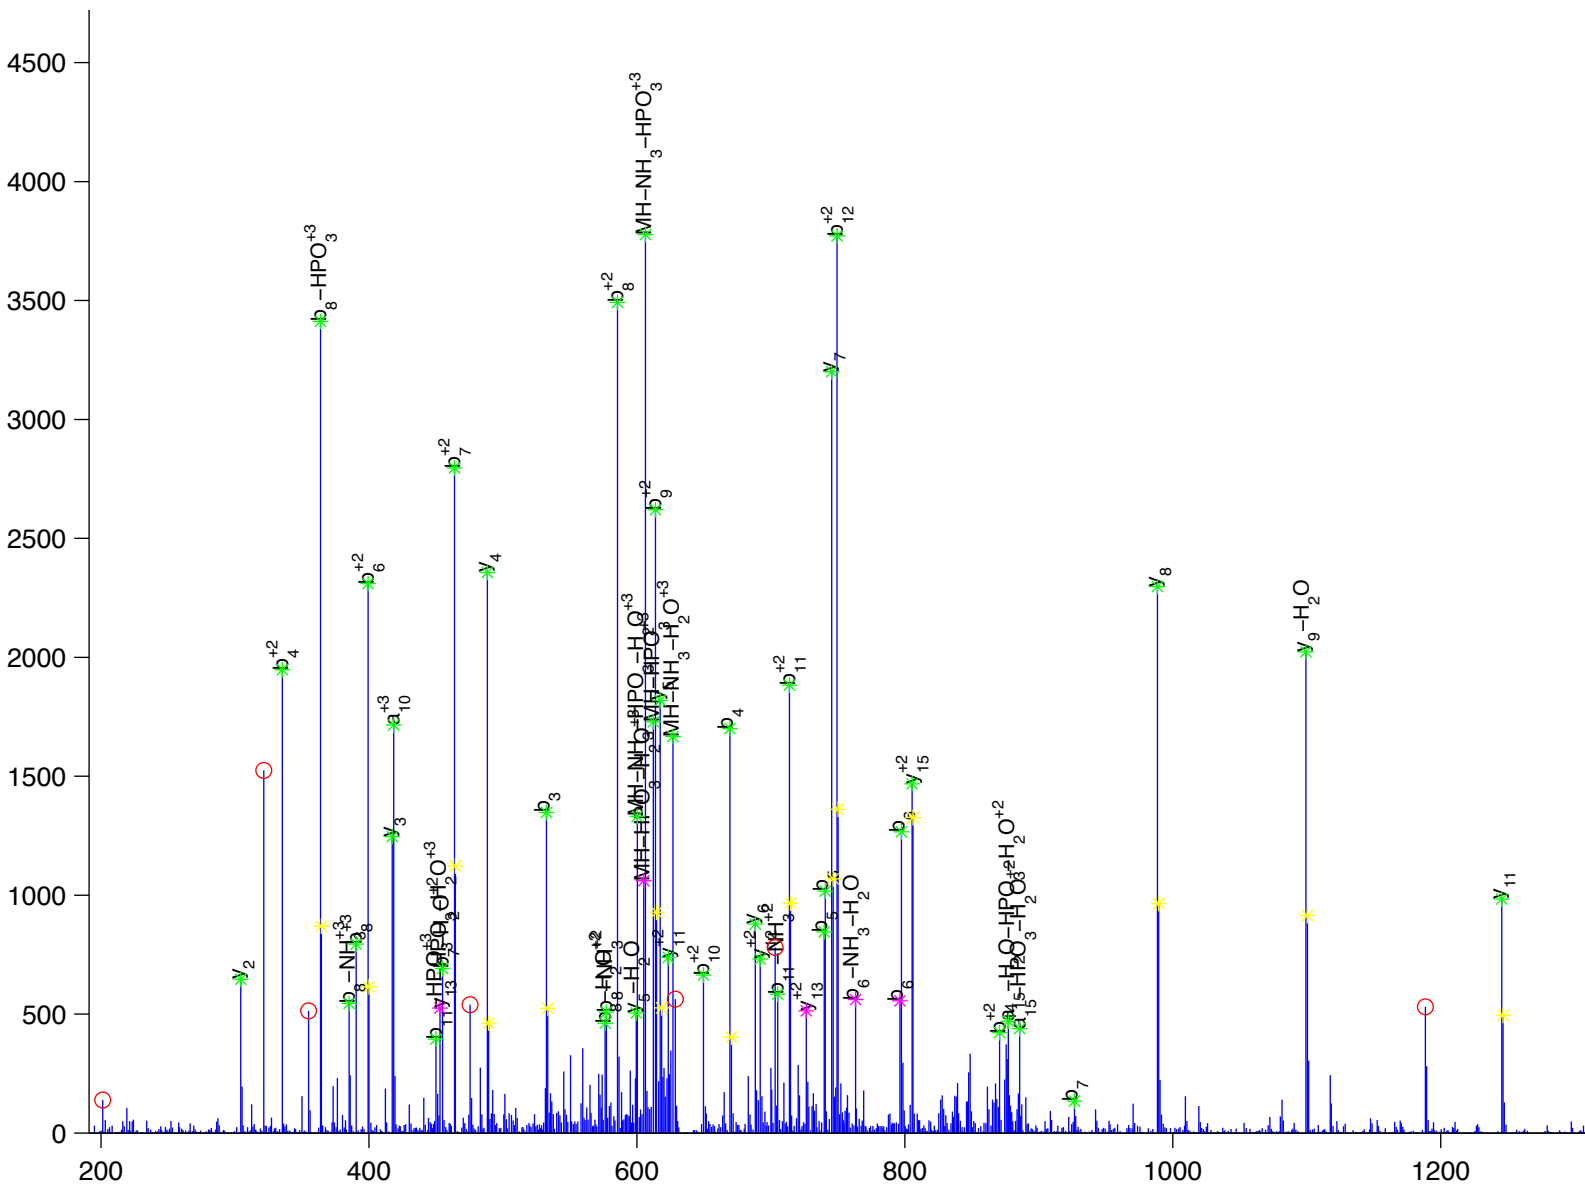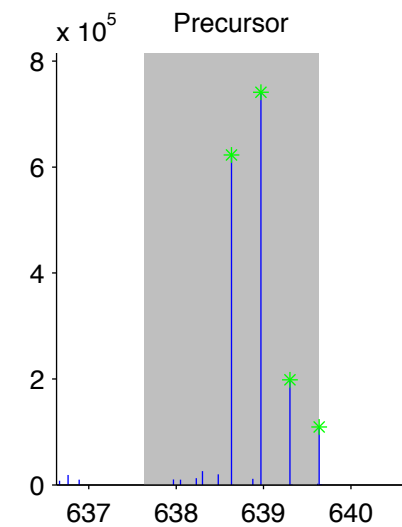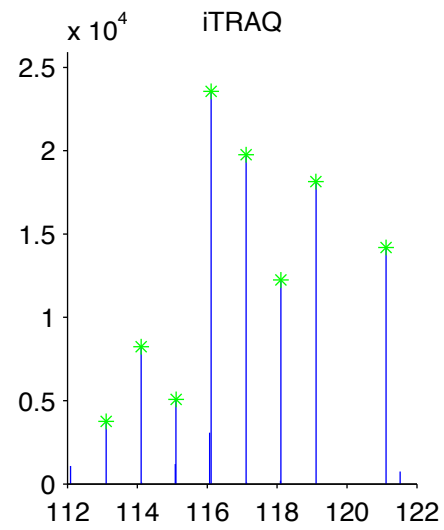



V[G]A[H]A[G]E[y]G[A]E[A]L[E]R

alpha 2 globin [Homo sapiens]

Charge State: +2

Scan Number: 5322

File Name: HJ050711\_GBMxeno\_bio1\_E\_HANNAH.raw

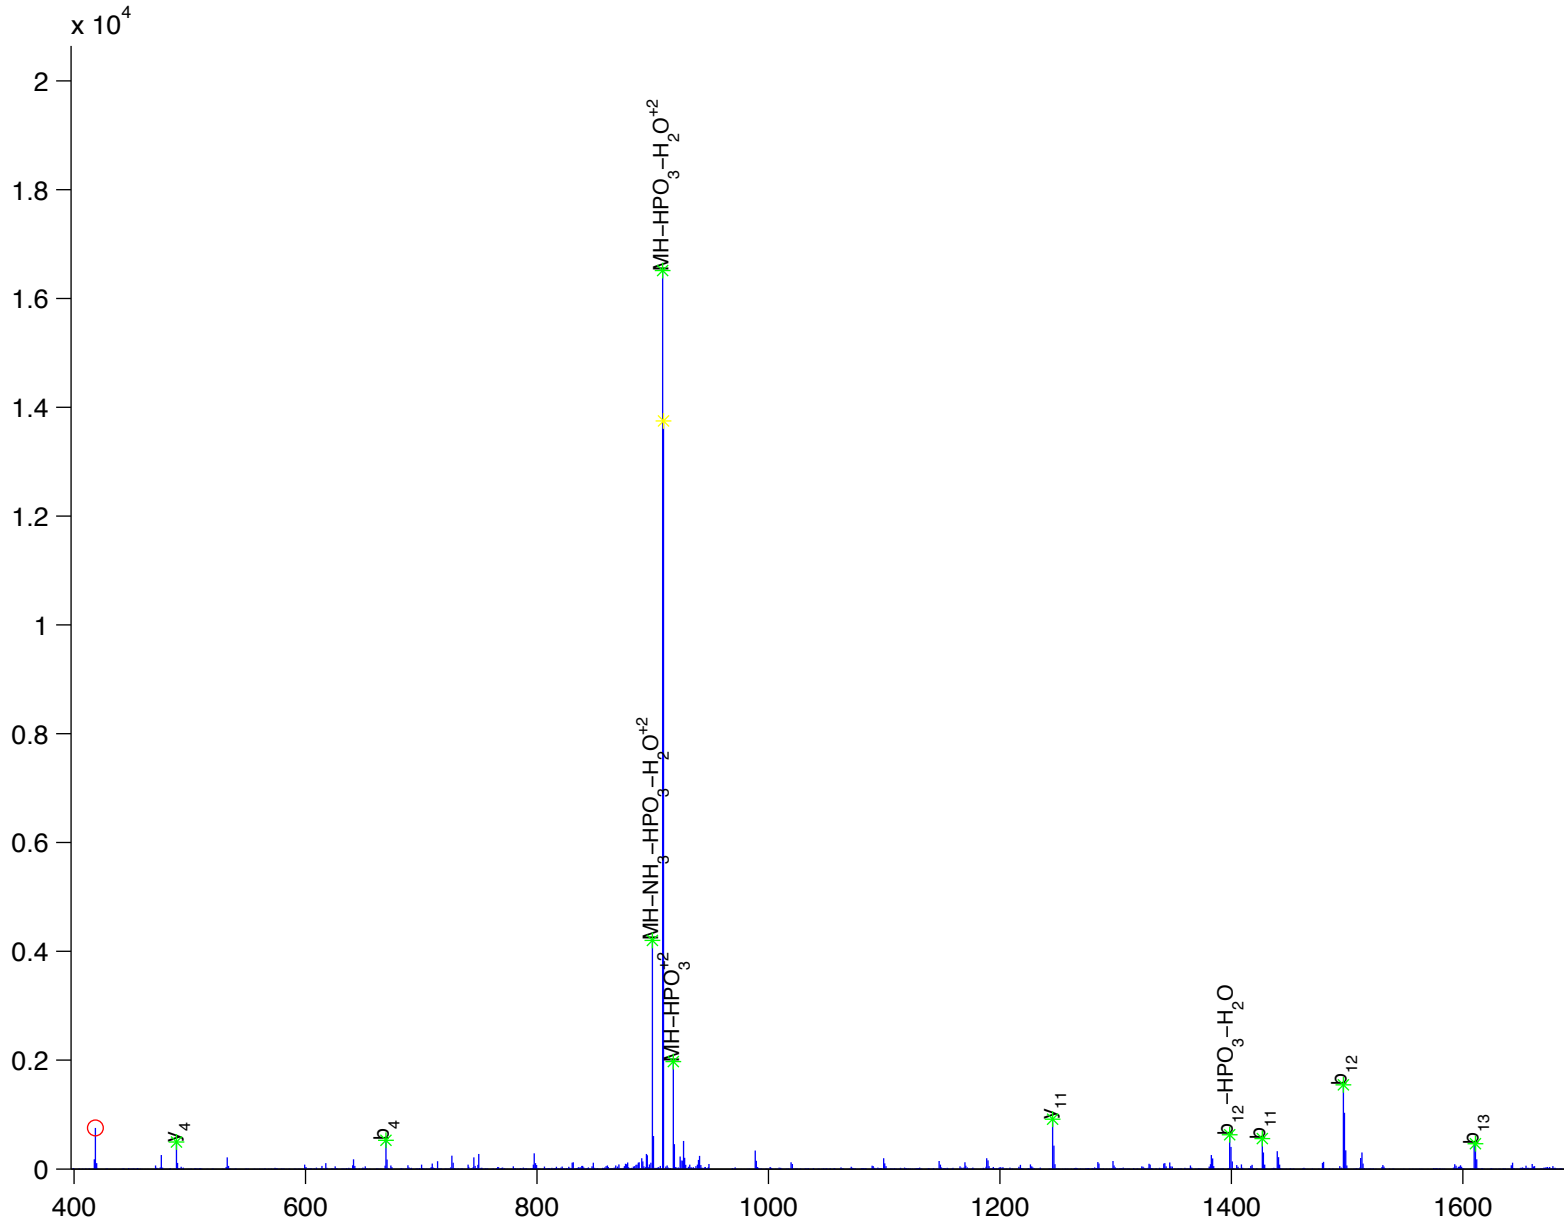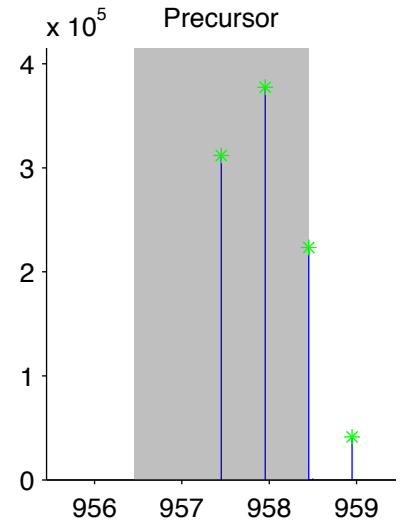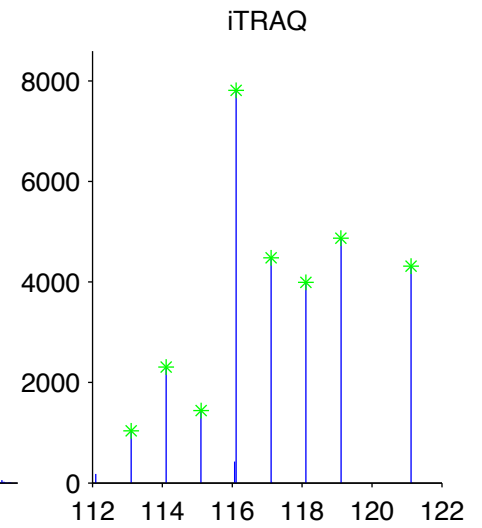

S<sup>1</sup>Y<sup>2</sup>S<sup>3</sup>P<sup>4</sup>y<sup>5</sup>D<sup>6</sup>M<sup>7</sup>L<sup>8</sup>E<sup>9</sup>S<sup>10</sup>I<sup>11</sup>R

annexin A2 isoform 2 [Homo sapiens]

Charge State: +2

Scan Number: 9161

File Name: HJ050711\_GBMxeno\_bio1\_E\_HANNAH.raw

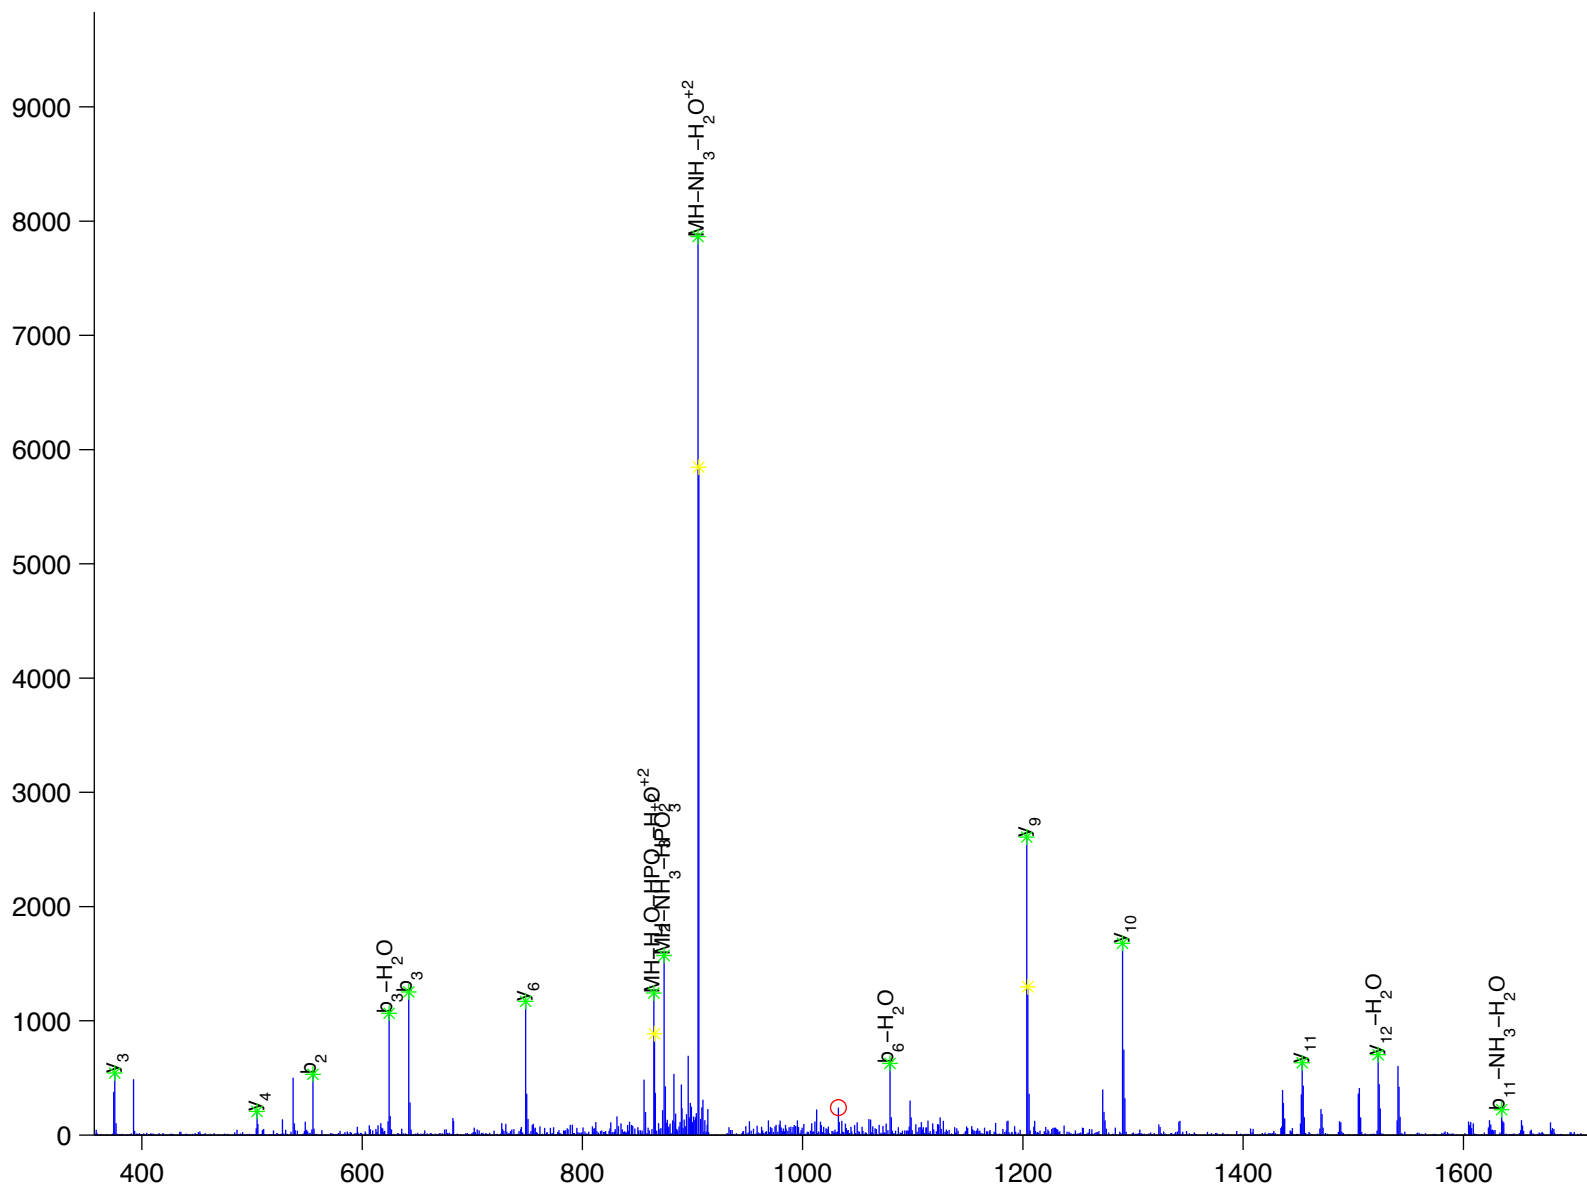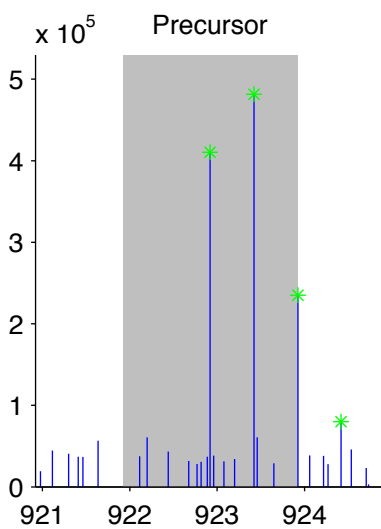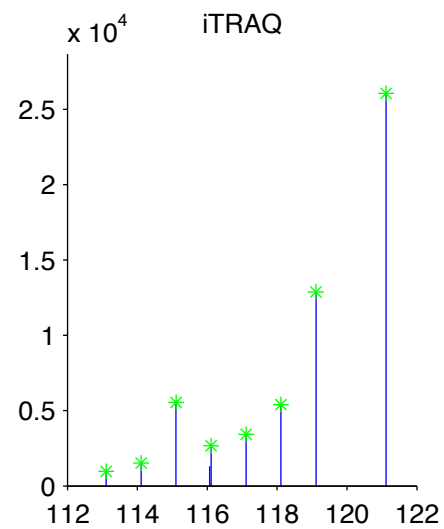







T T G I V M D S G D G V T H T V P I y E G Y A L P H A I L R

beta actin [Homo sapiens]

Charge State: +4

Scan Number: 8199

File Name: HJ050711\_GBMxeno\_bio1\_E\_HANNAH.raw

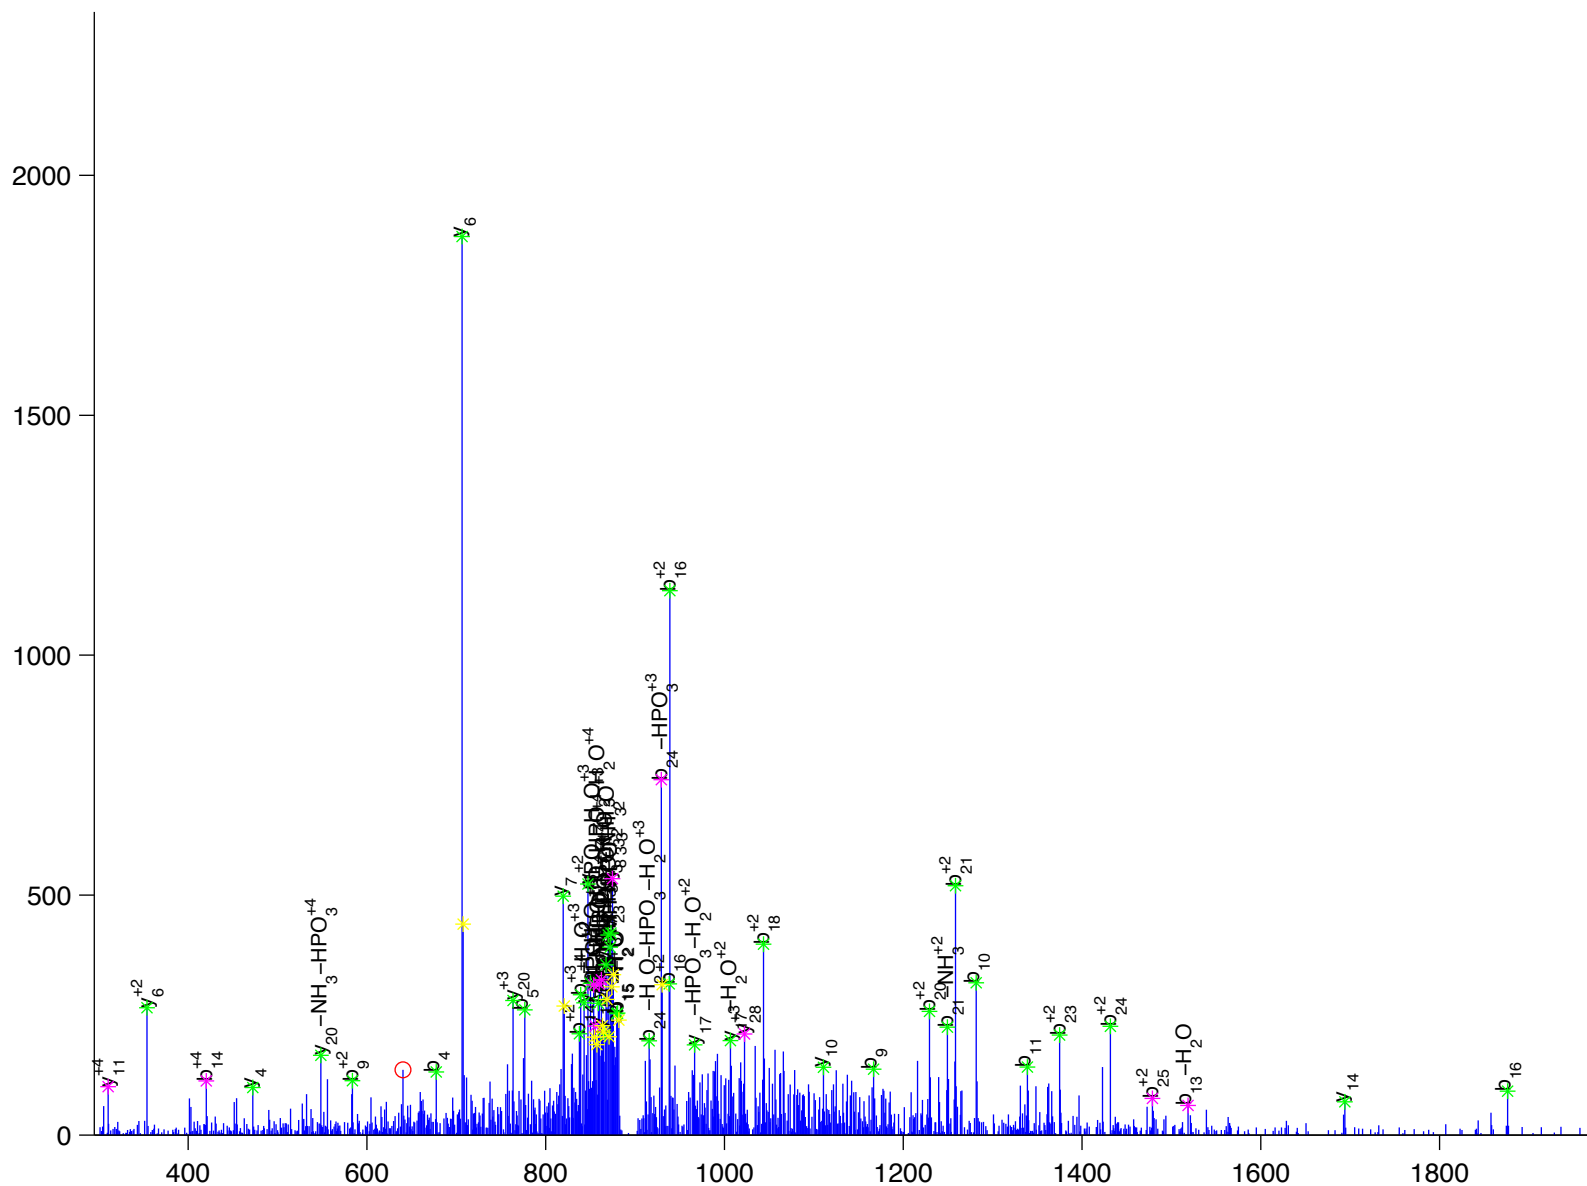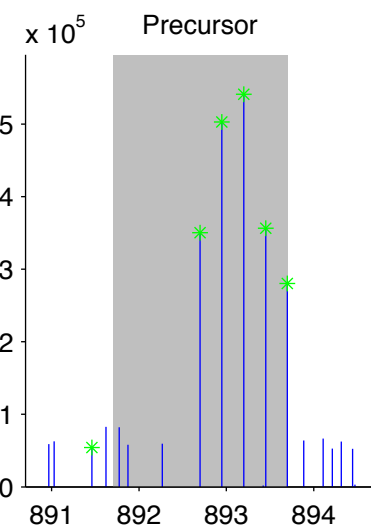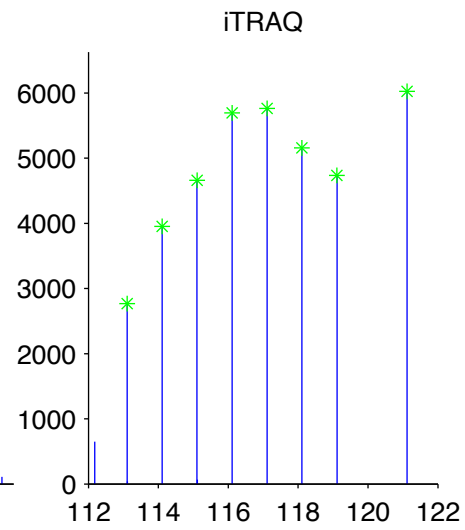

Q [ y ] P [ F ] Q [ I ] V [ Y ] K

BMX non-receptor tyrosine kinase [Homo sapiens]

Charge State: +3

Scan Number: 6429

File Name: HJ050711\_GBMxeno\_bio1\_E\_HANNAH.raw

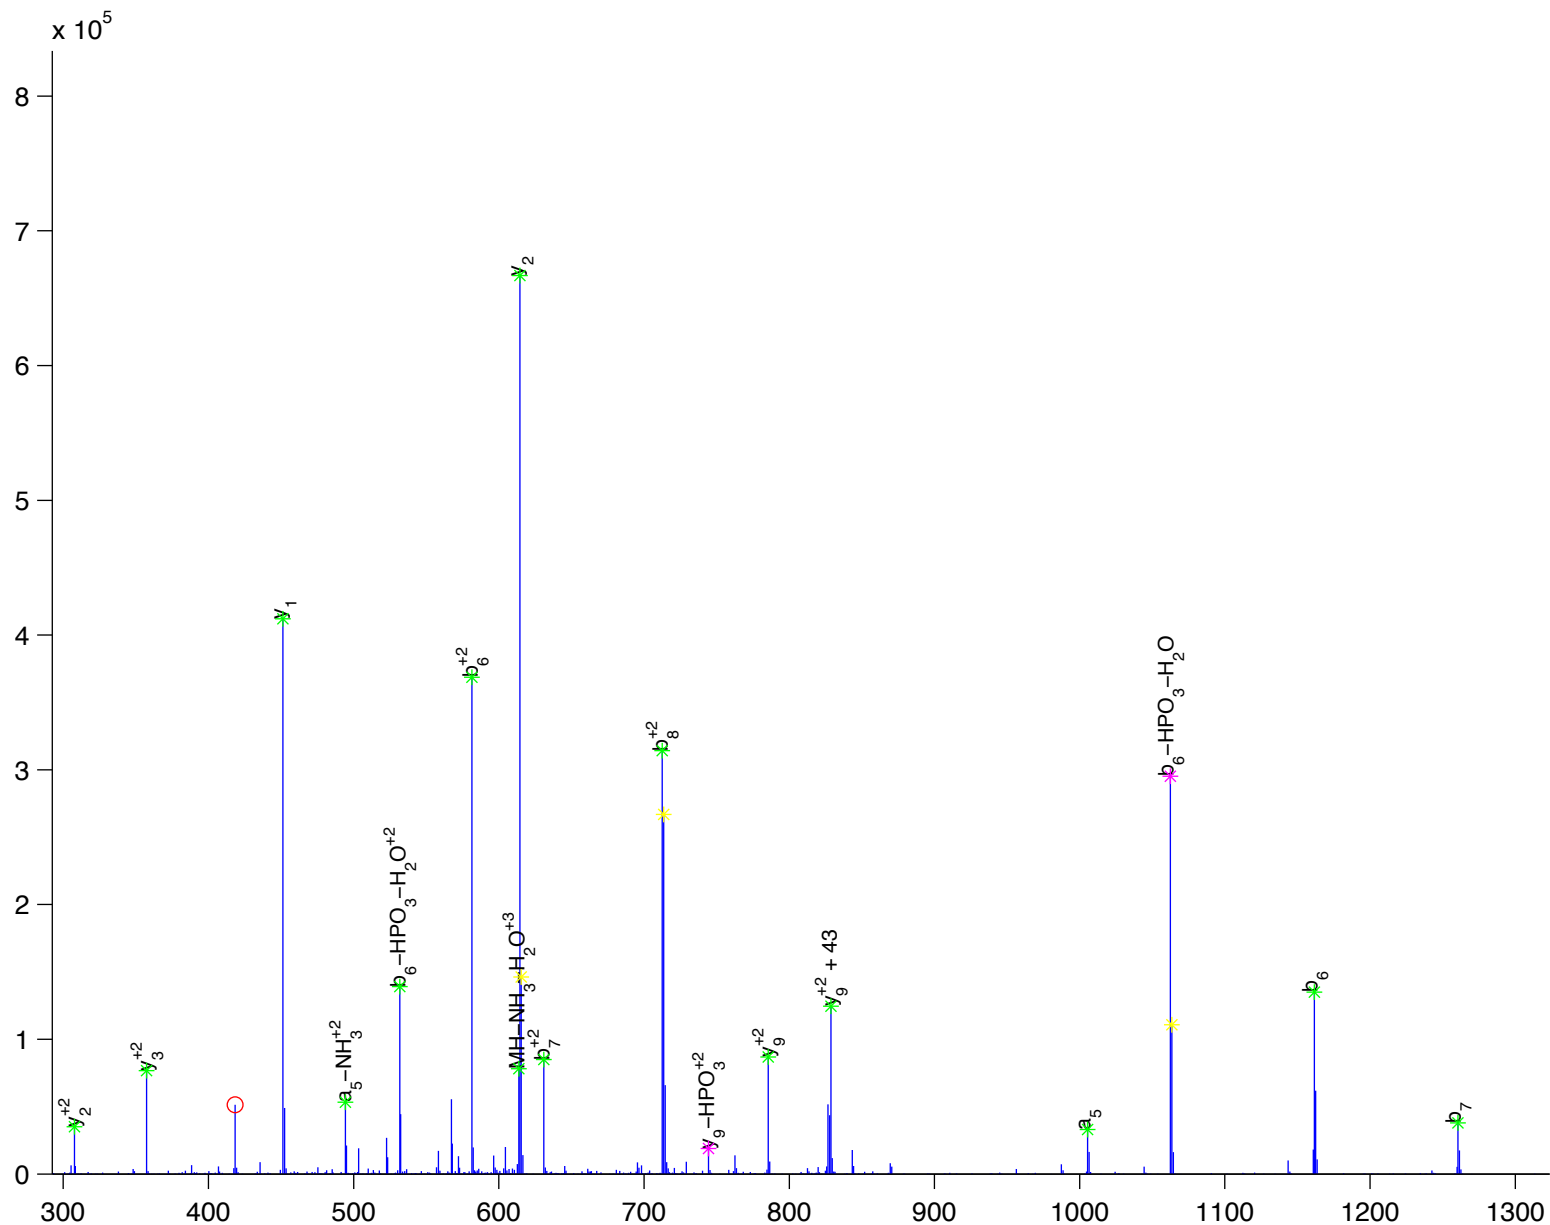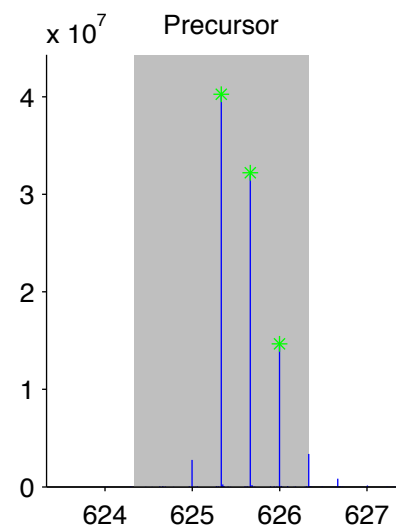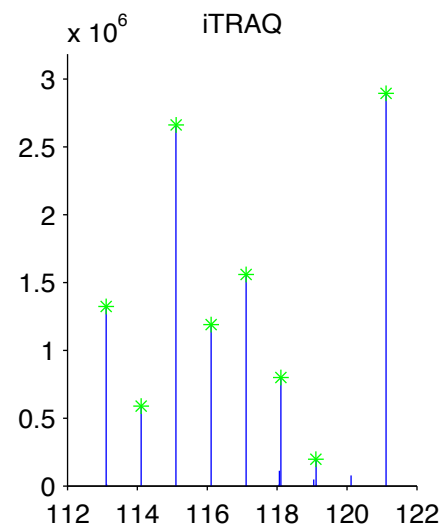

H [ L ] L [ A ] P [ G ] P [ Q ] D [ I ] y [ D ] V [ P ] P [ V ] R

breast cancer anti-estrogen resistance 1 [Homo sapiens]

Charge State: +3

Scan Number: 6977

File Name: HJ050711\_GBMxeno\_bio1\_E\_HANNAH.raw

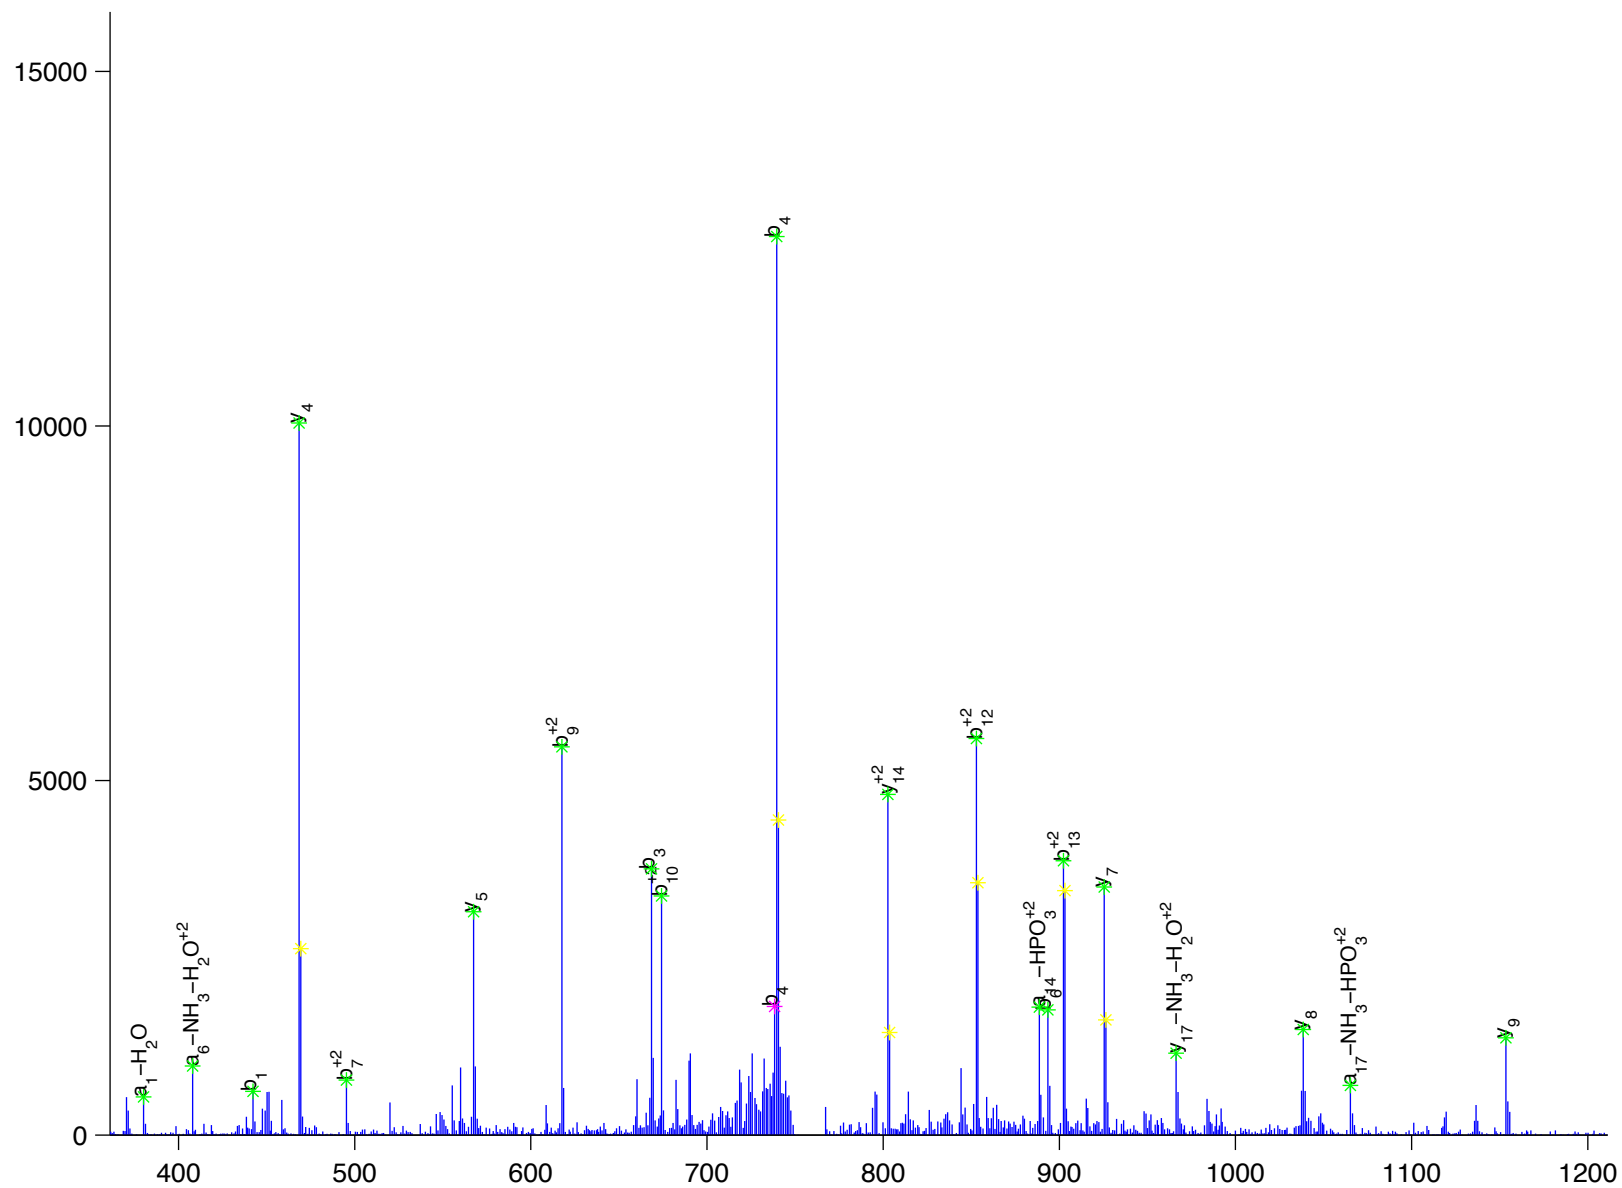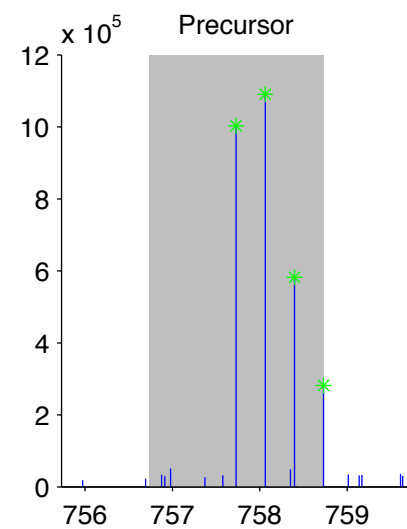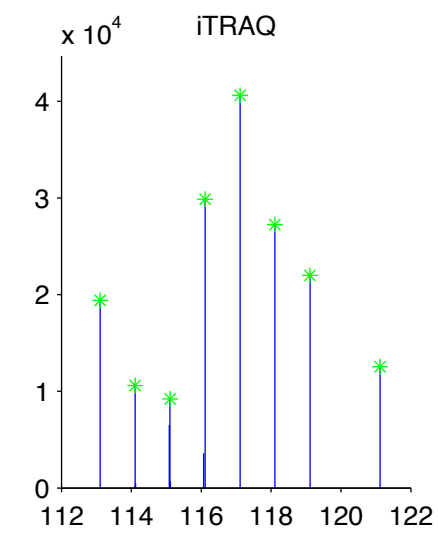



D[V]P[D]G[P]L[L]R[E]E[T]y[D]V[P]P[A]F[A]K

breast cancer anti-estrogen resistance 1 [Homo sapiens]

Charge State: +3

Scan Number: 7945

File Name: HJ050711\_GBMxeno\_bio1\_E\_HANNAH.raw

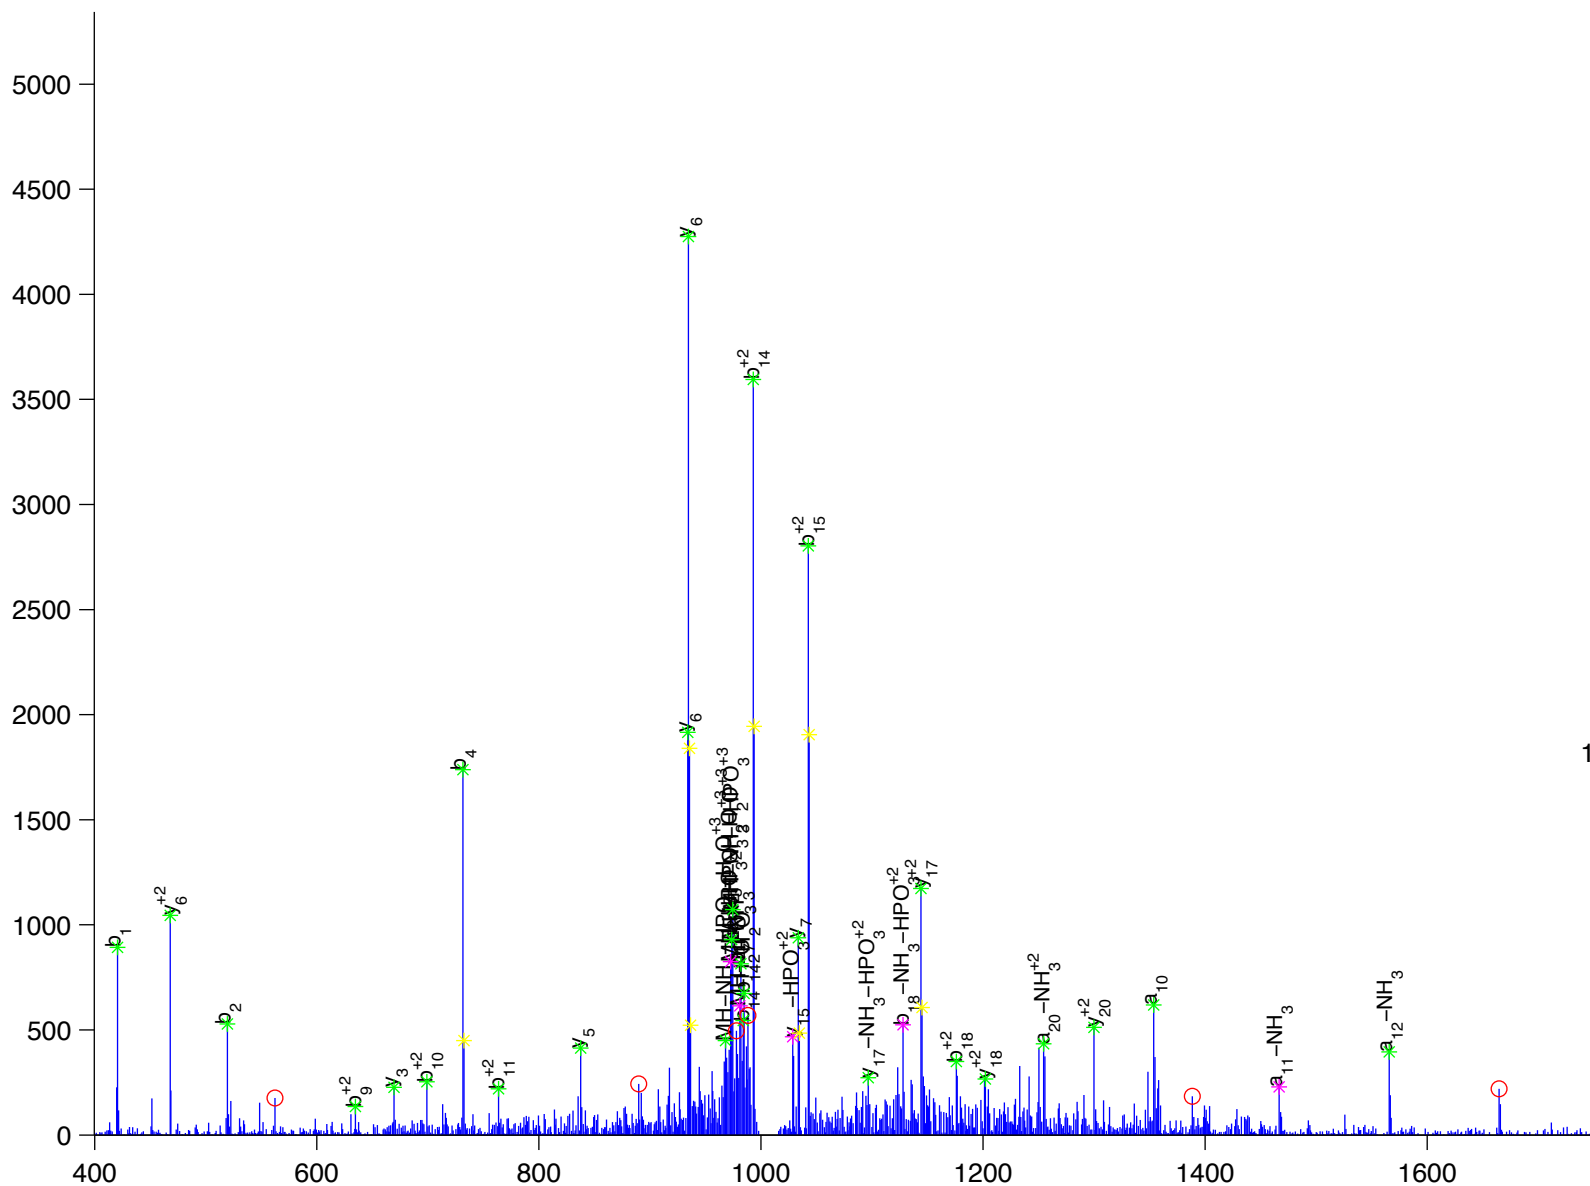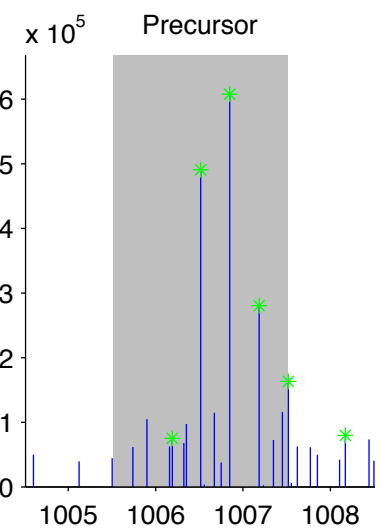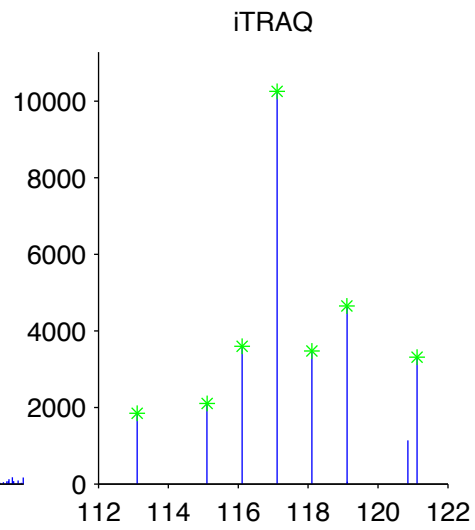

G [ P ] S y G L S A E V K

calponin 3 [Homo sapiens]

Charge State: +3

Scan Number: 5696

File Name: HJ050711\_GBMxeno\_bio1\_E\_HANNAH.raw

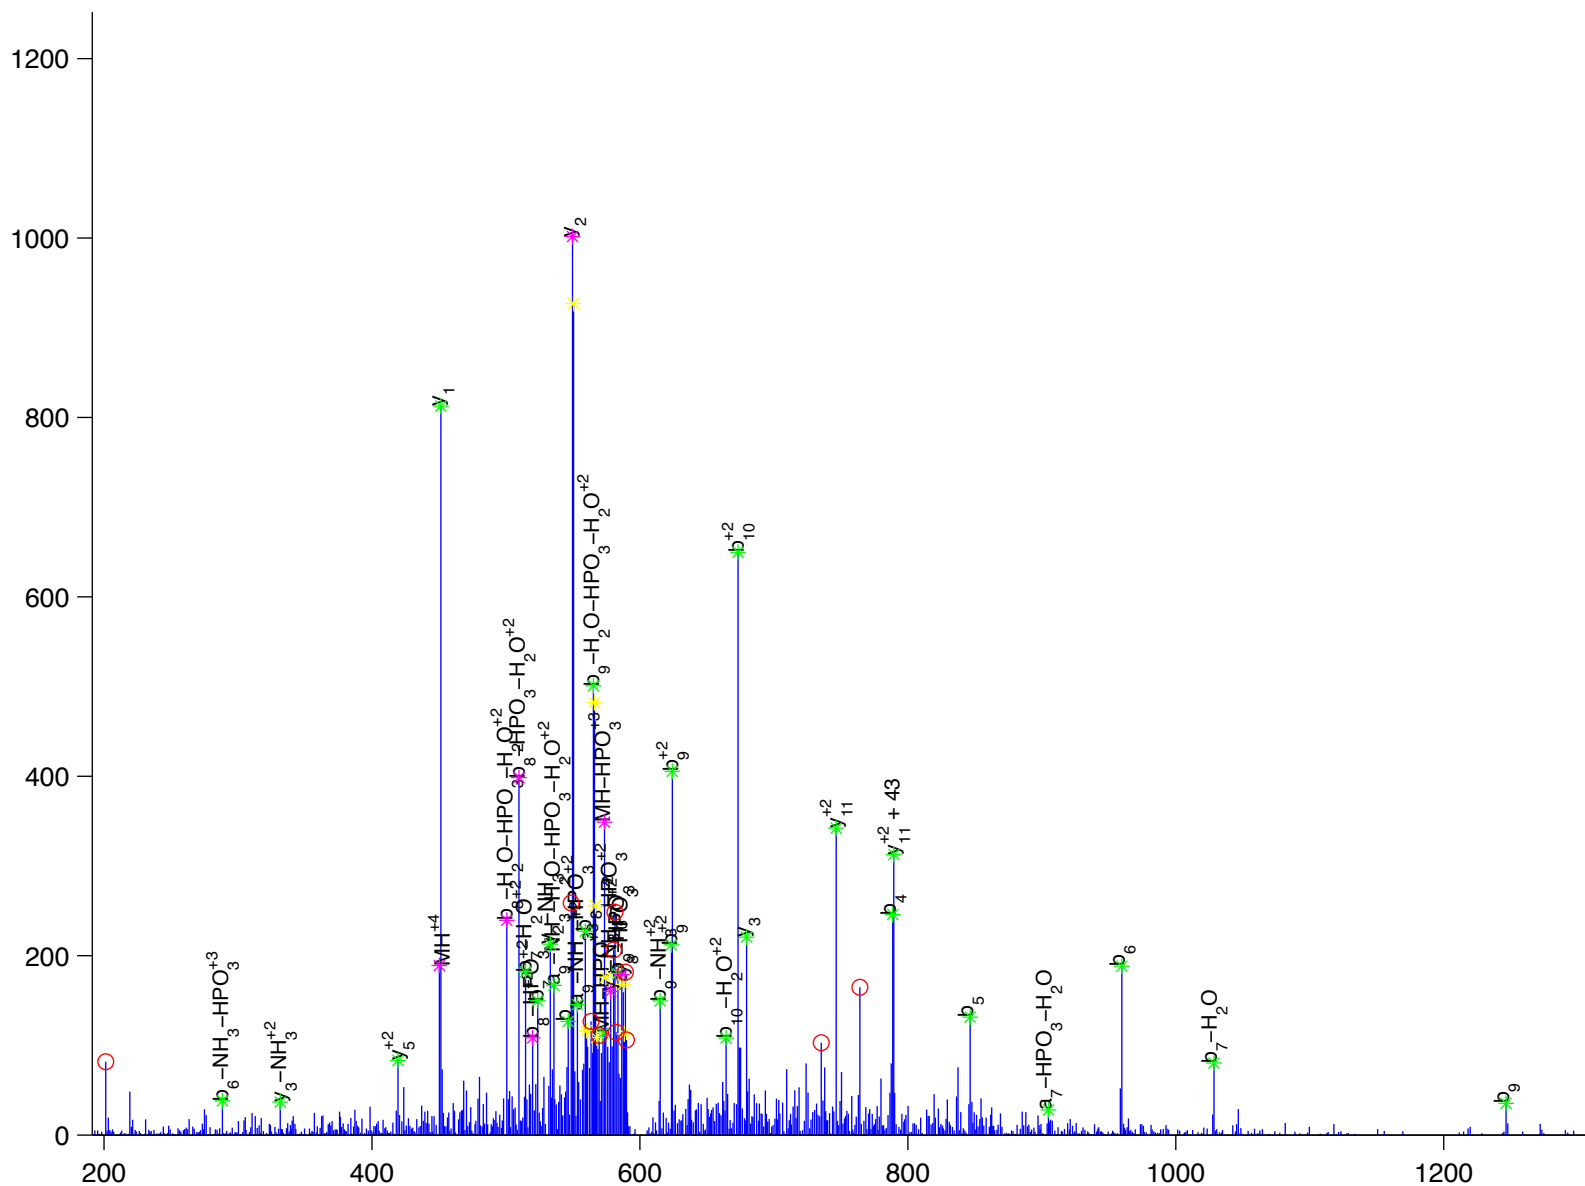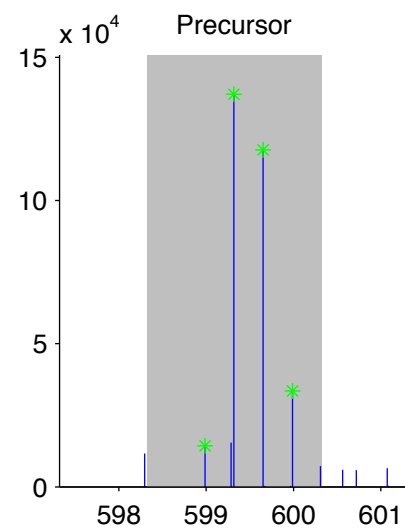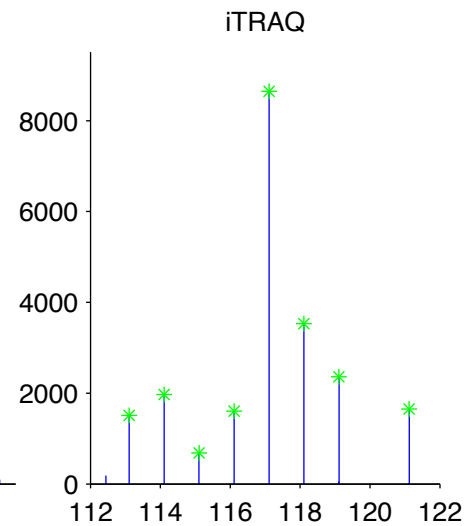

G [ M ] S [ V ] y [ G ] L [ G ] R

calponin 3 [Homo sapiens]

Charge State: +2

Scan Number: 6263

File Name: HJ050711\_GBMxeno\_bio1\_E\_HANNAH.raw

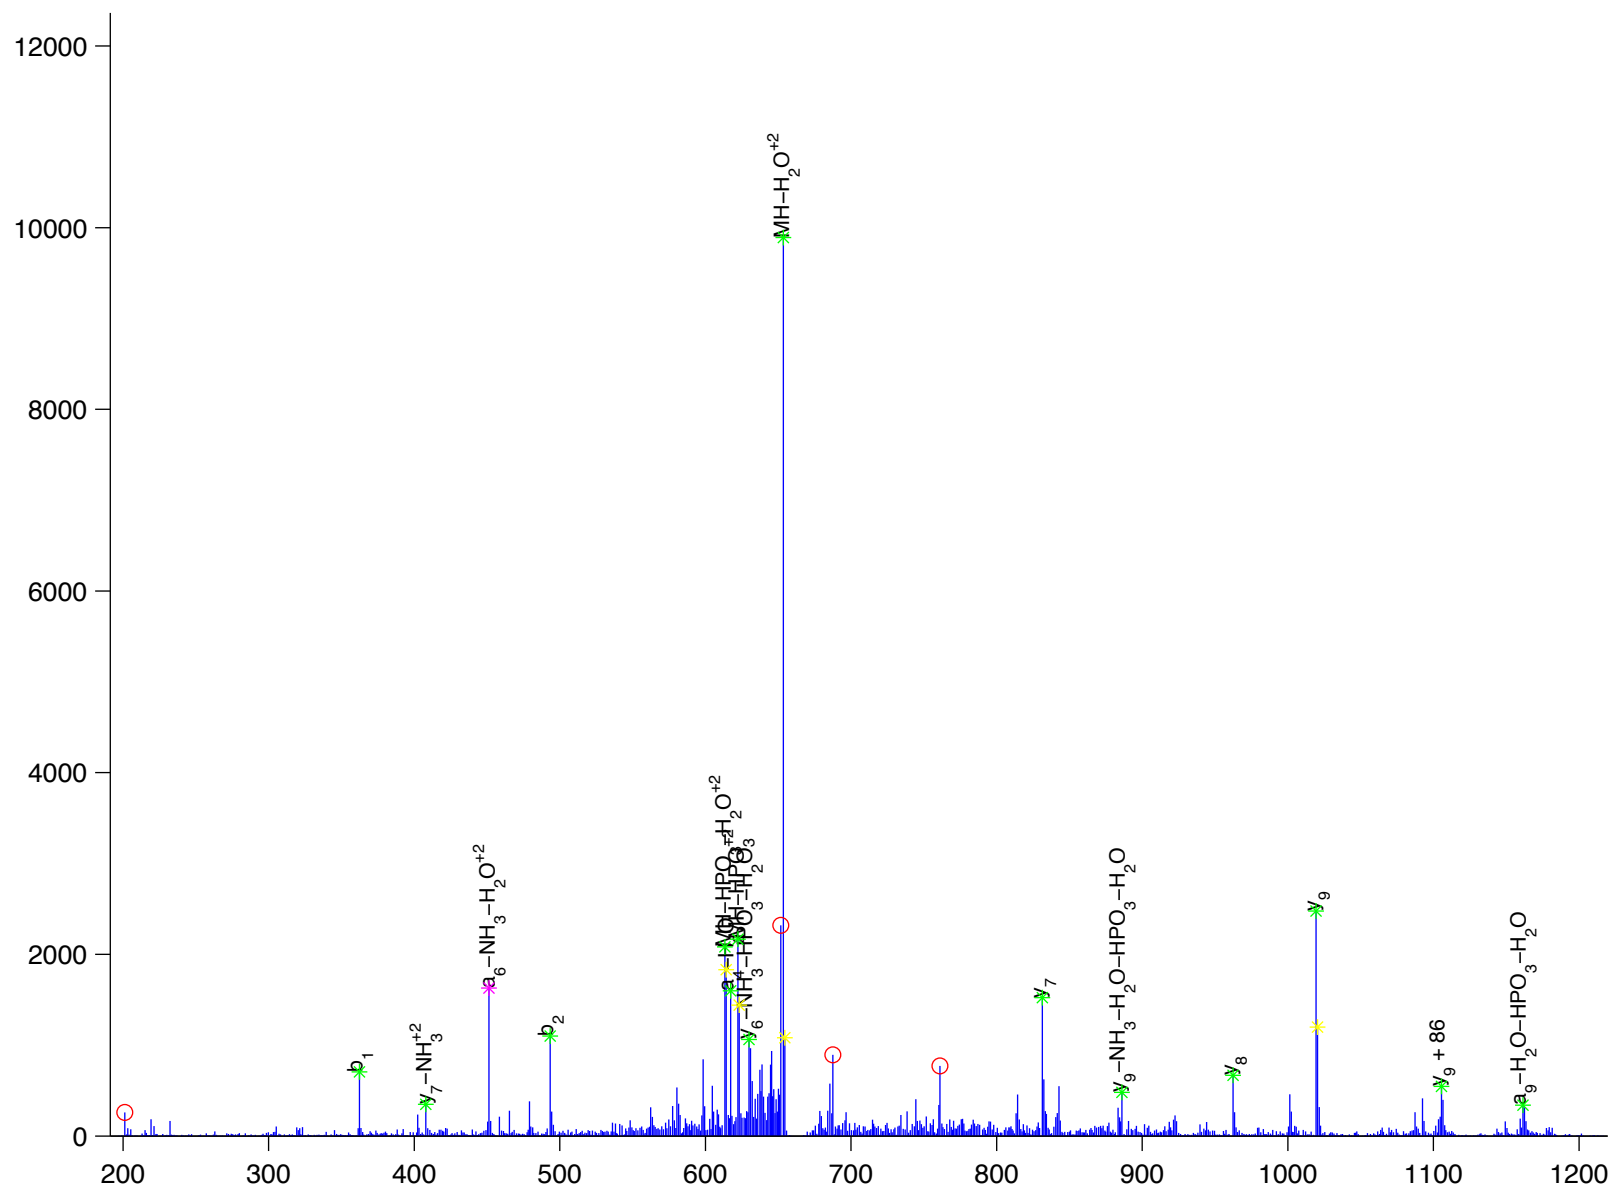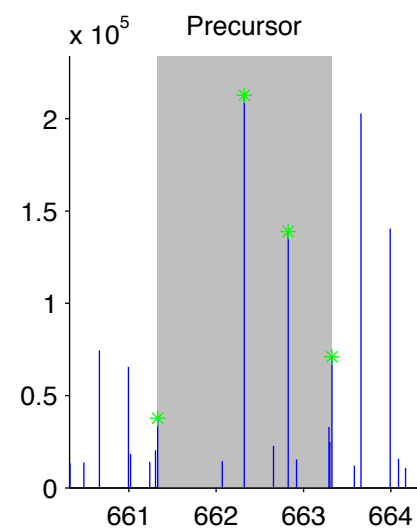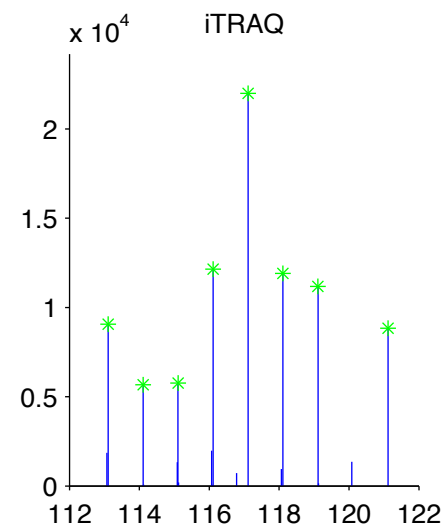



M [ y ] E [ E ] N [ S ] Q [ P ] R

Cas-Br-M (murine) ecotropic retroviral transforming sequence [Homo sapiens]

Charge State: +2

Scan Number: 3096

File Name: HJ050711\_GBMxeno\_bio1\_E\_HANNAH.raw

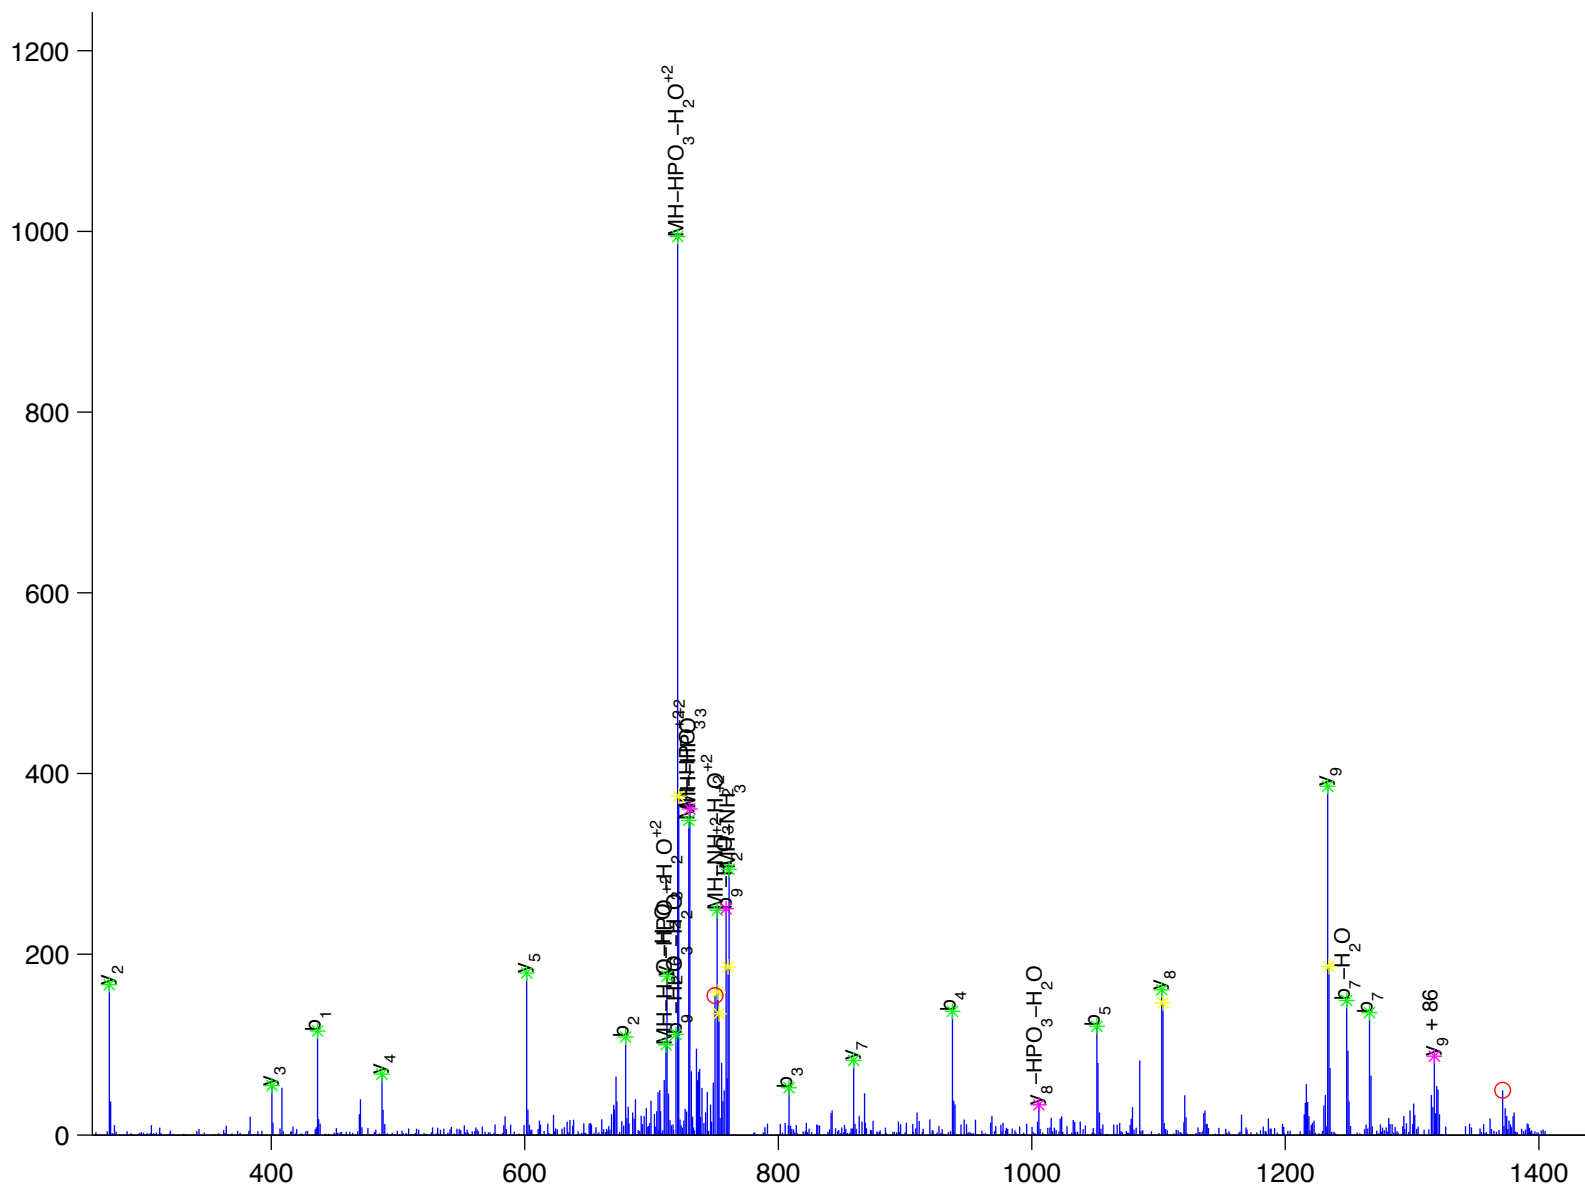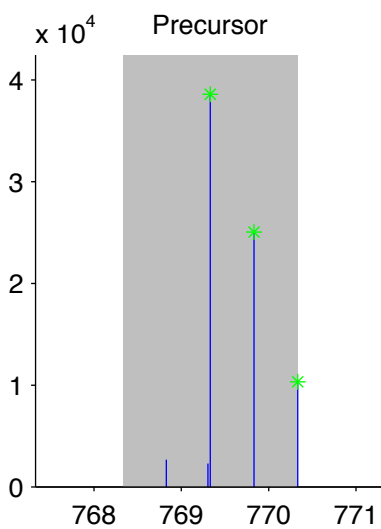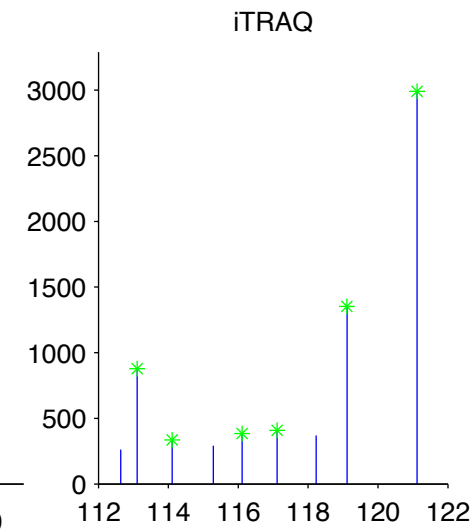

M [ y ] E [ E ] N [ S ] Q [ P ] R

Cas-Br-M (murine) ecotropic retroviral transforming sequence [Homo sapiens]

Charge State: +2

Scan Number: 3144

File Name: HJ050711\_GBMxeno\_bio1\_E\_HANNAH.raw

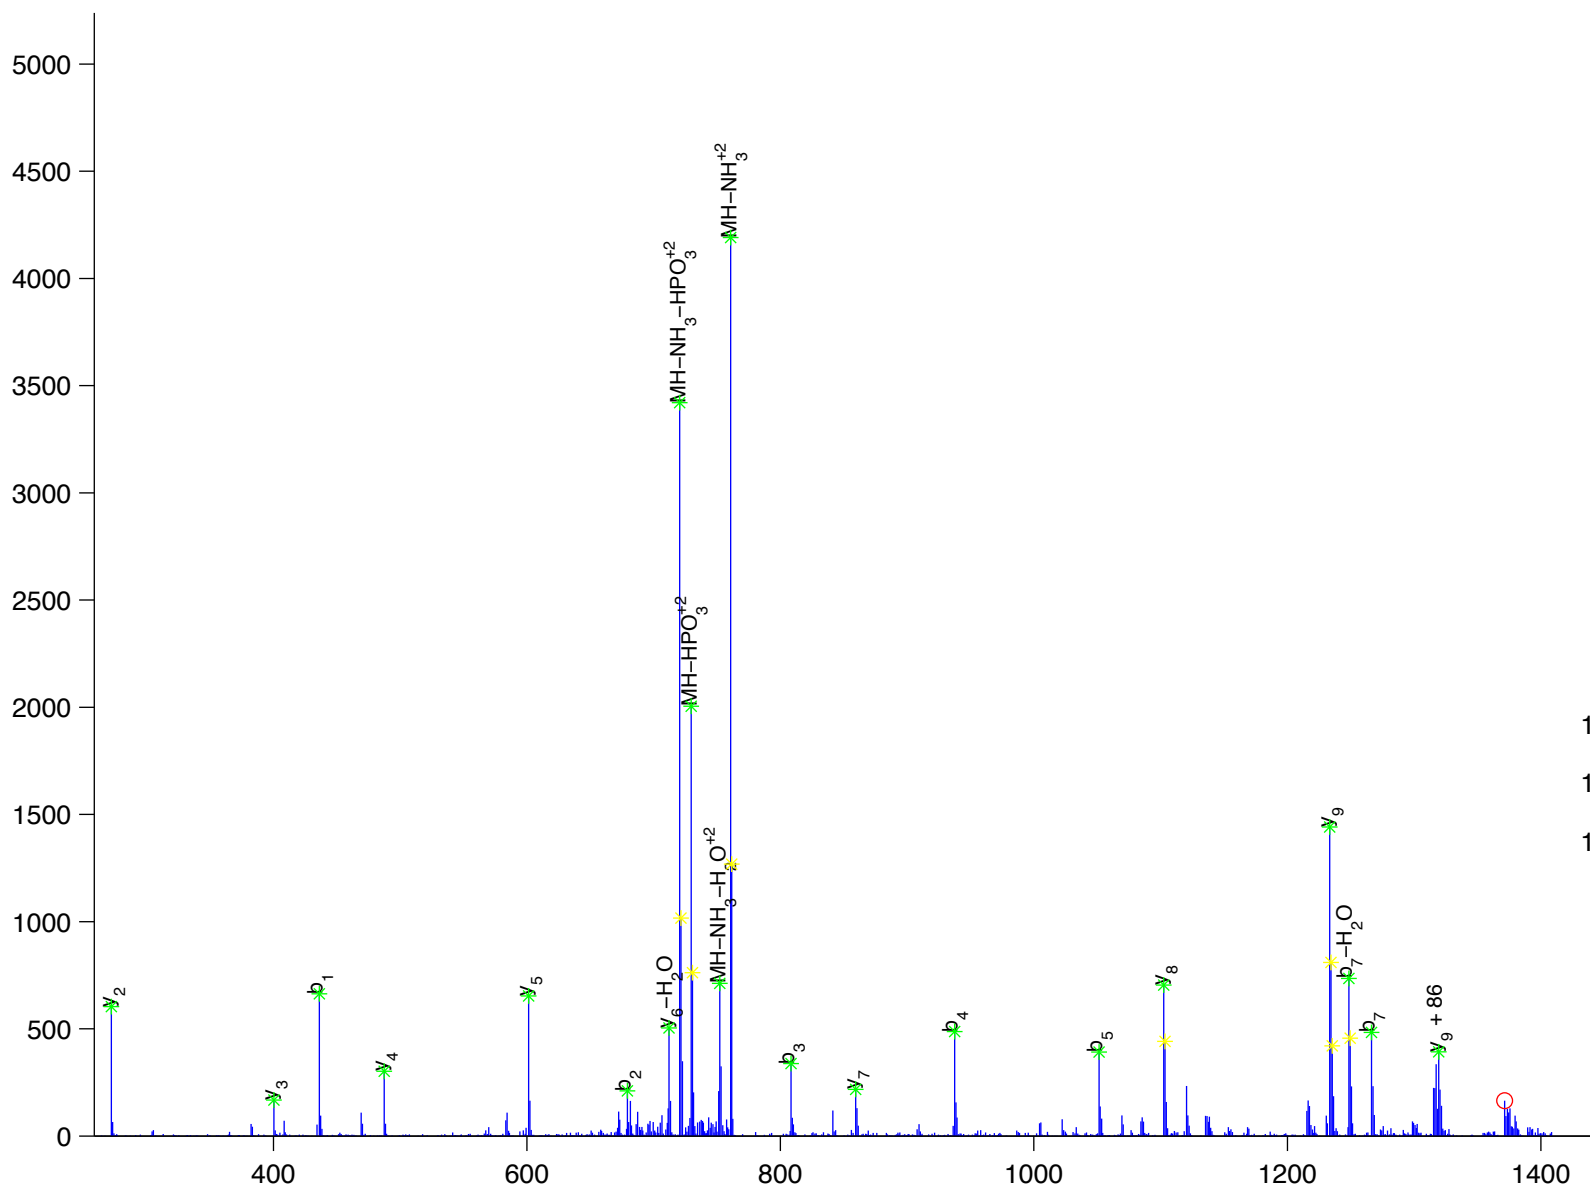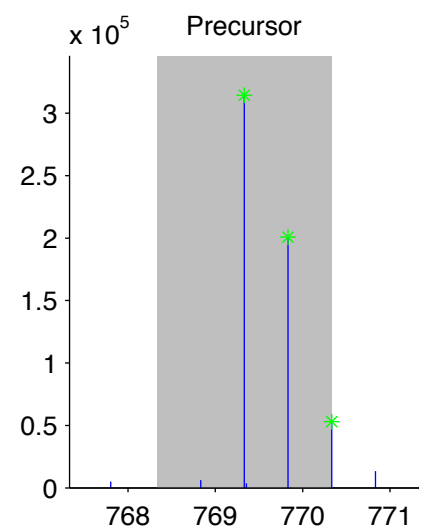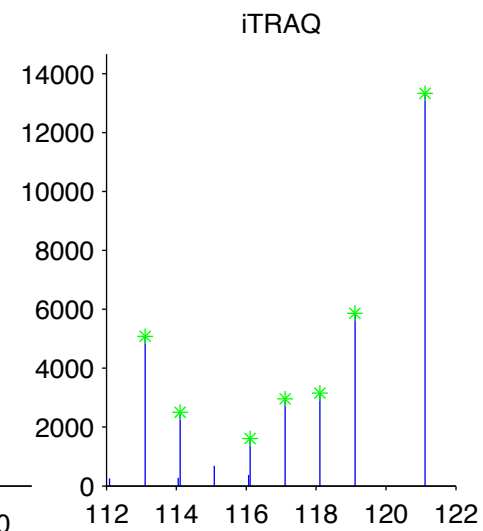

N<sup>+</sup>T<sup>+</sup>y<sup>+</sup>N<sup>+</sup>Q<sup>+</sup>T<sup>+</sup>A<sup>+</sup>L<sup>+</sup>D<sup>+</sup>I<sup>+</sup>V<sup>+</sup>N<sup>+</sup>Q<sup>+</sup>F<sup>+</sup>T<sup>+</sup>T<sup>+</sup>S<sup>+</sup>Q<sup>+</sup>A<sup>+</sup>S<sup>+</sup>R

cask-interacting protein 2 [Homo sapiens]

Charge State: +3

Scan Number: 9474

File Name: HJ050711\_GBMxeno\_bio1\_E\_HANNAH.raw

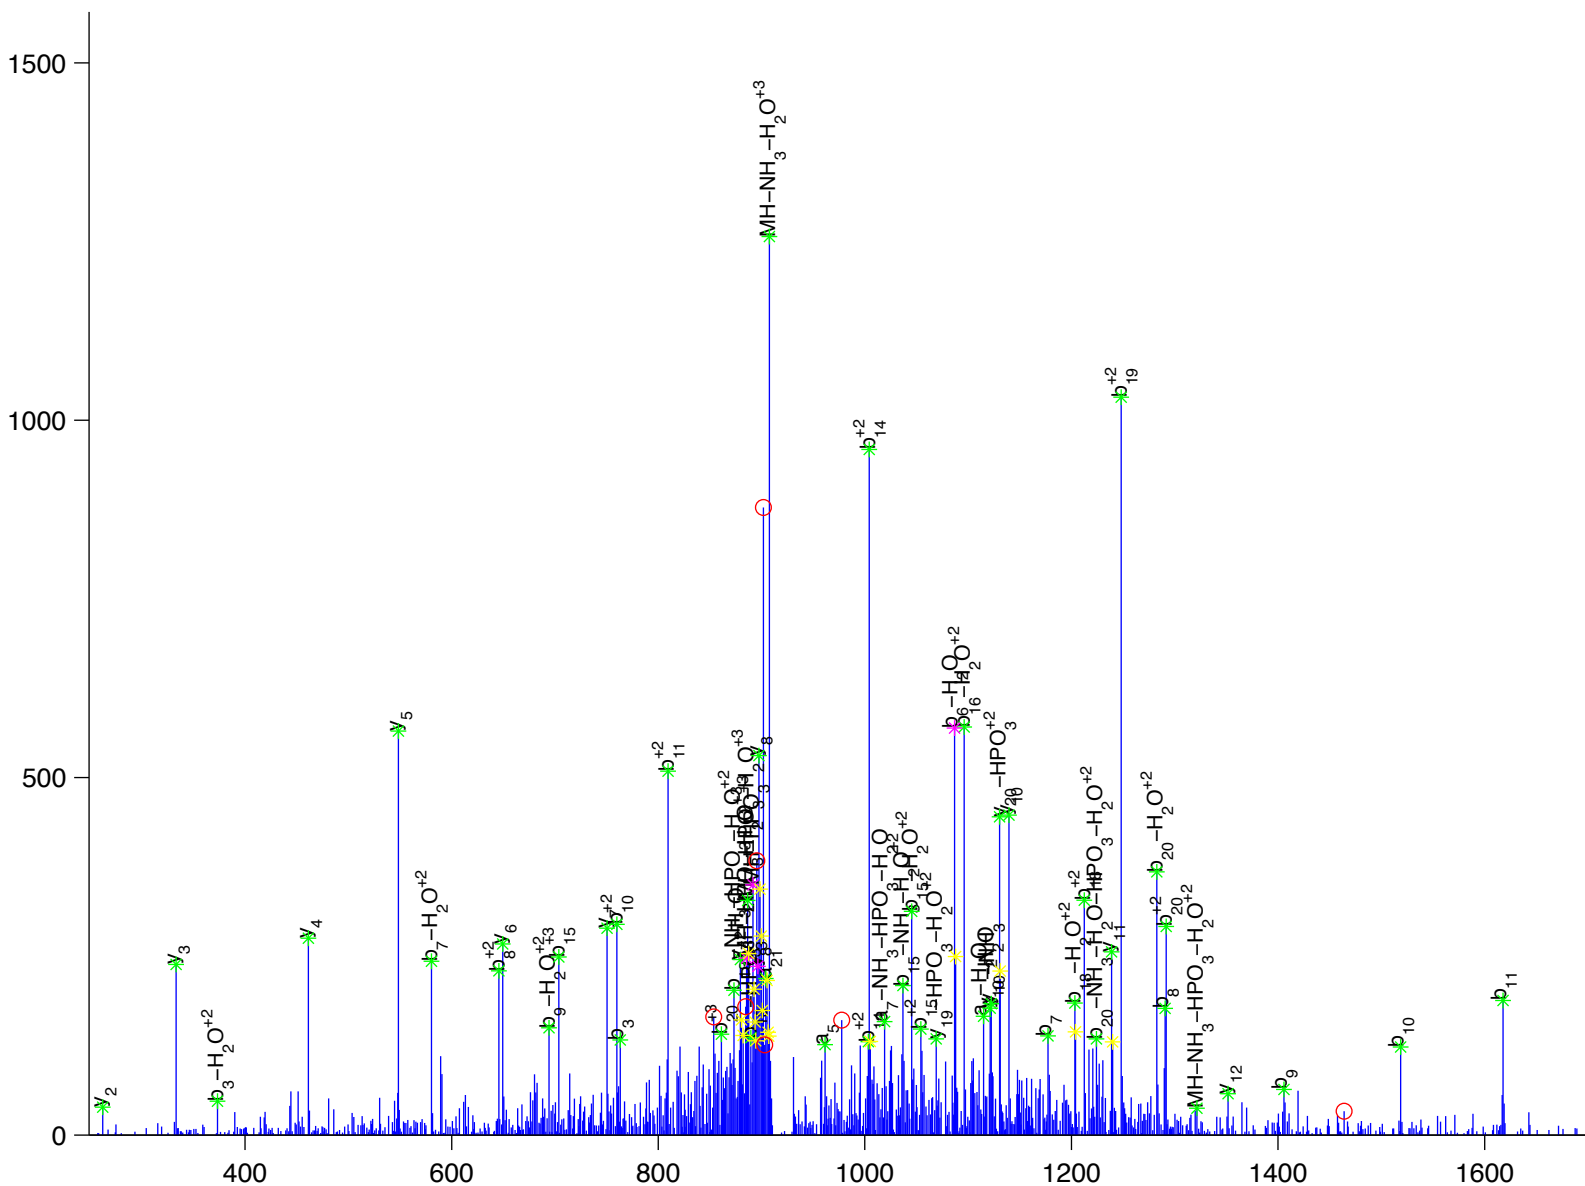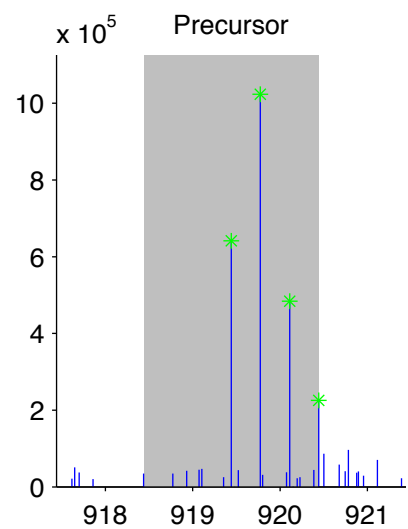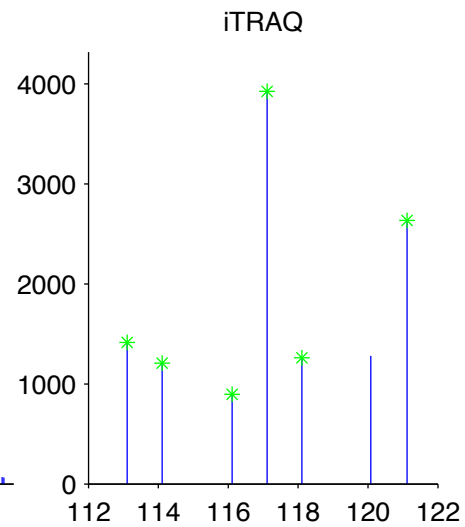

G [ G ] S [ A ] P [ E ] G [ A ] T y [ A ] A [ P ] R

catenin (cadherin-associated protein), delta 2 (neural plakophilin-related arm-repeat protein) [Hom

Charge State: +3

Scan Number: 2987

File Name: HJ050711\_GBMxeno\_bio1\_E\_HANNAH.raw

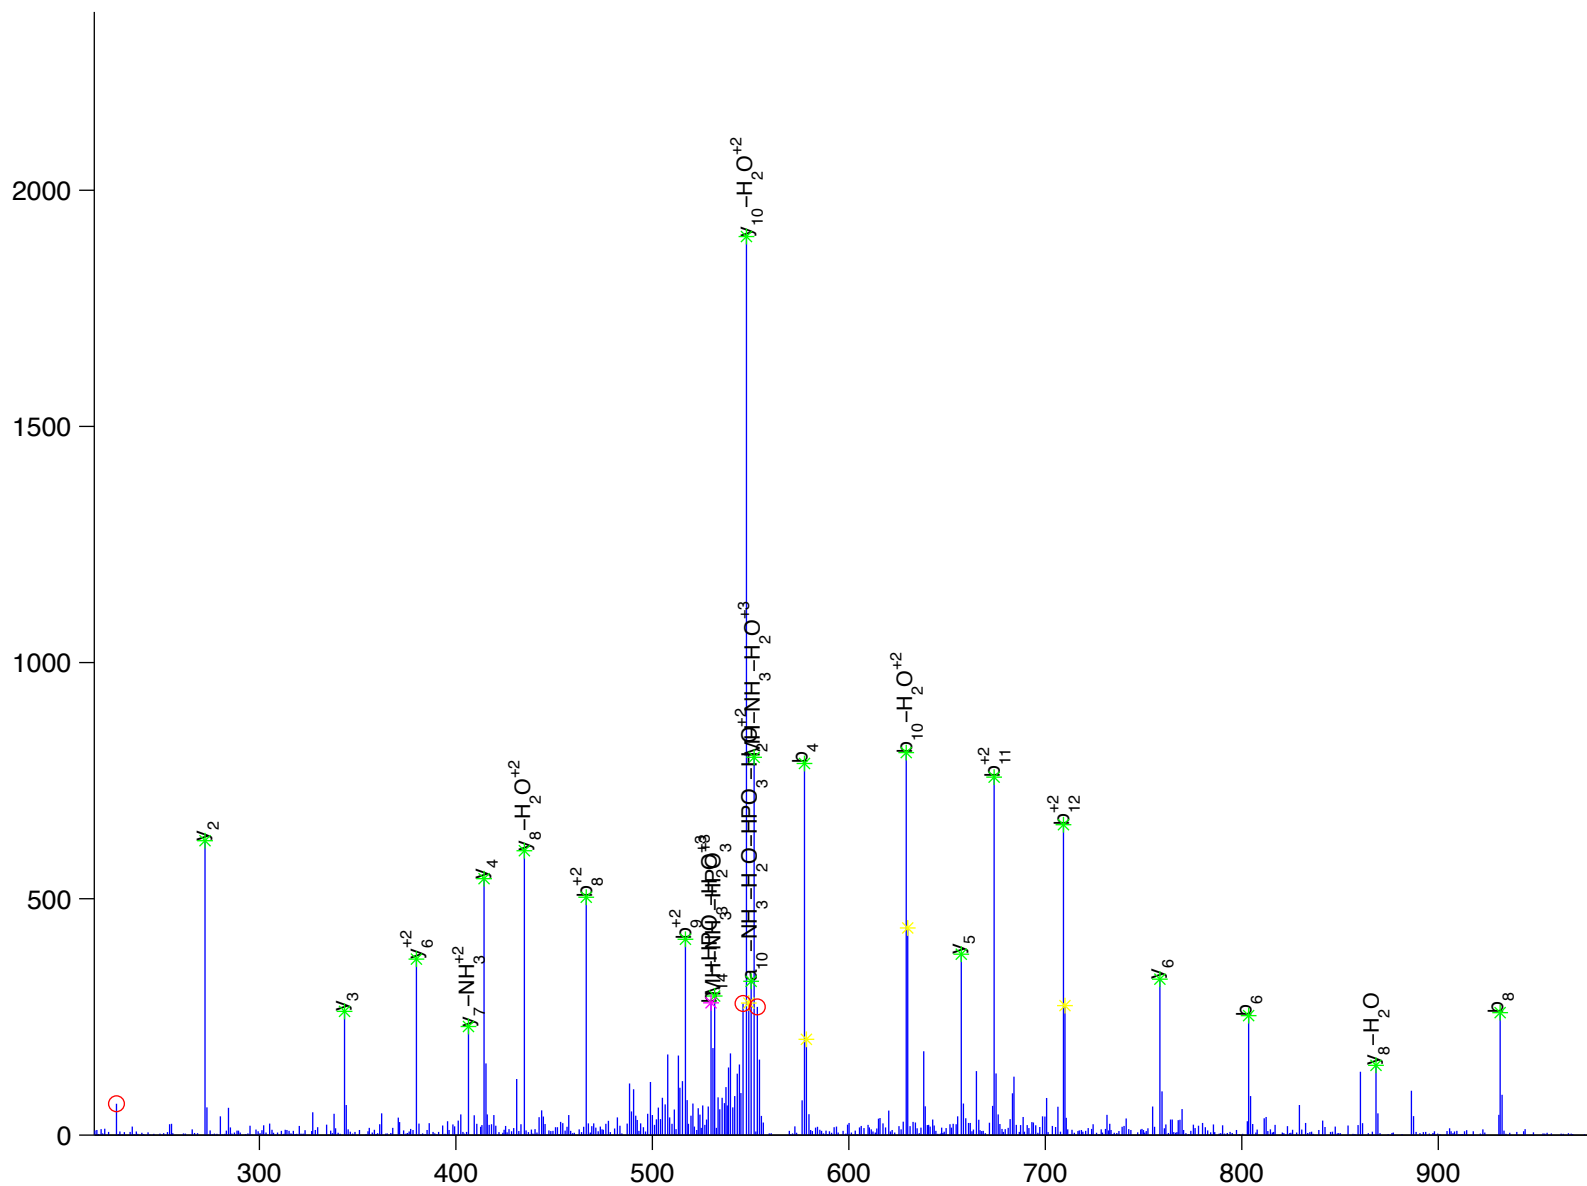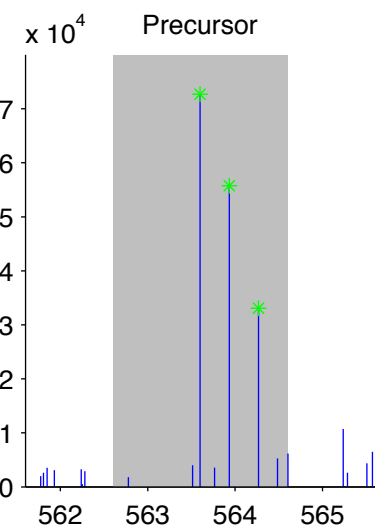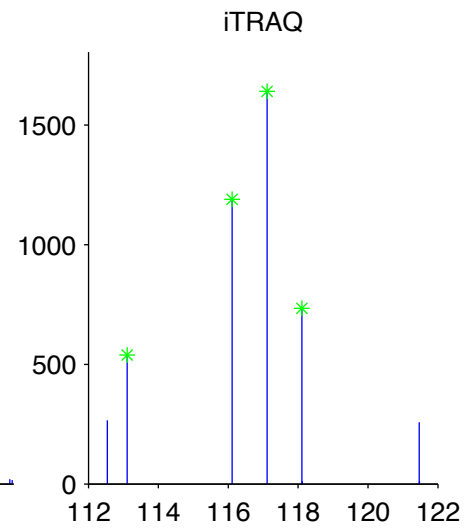



G [ G ] S [ A ] P [ E ] G [ A ] T y [ A ] A [ P ] R

catenin (cadherin-associated protein), delta 2 (neural plakophilin-related arm-repeat protein) [Hom

Charge State: +2

Scan Number: 2989

File Name: HJ050711\_GBMxeno\_bio1\_E\_HANNAH.raw

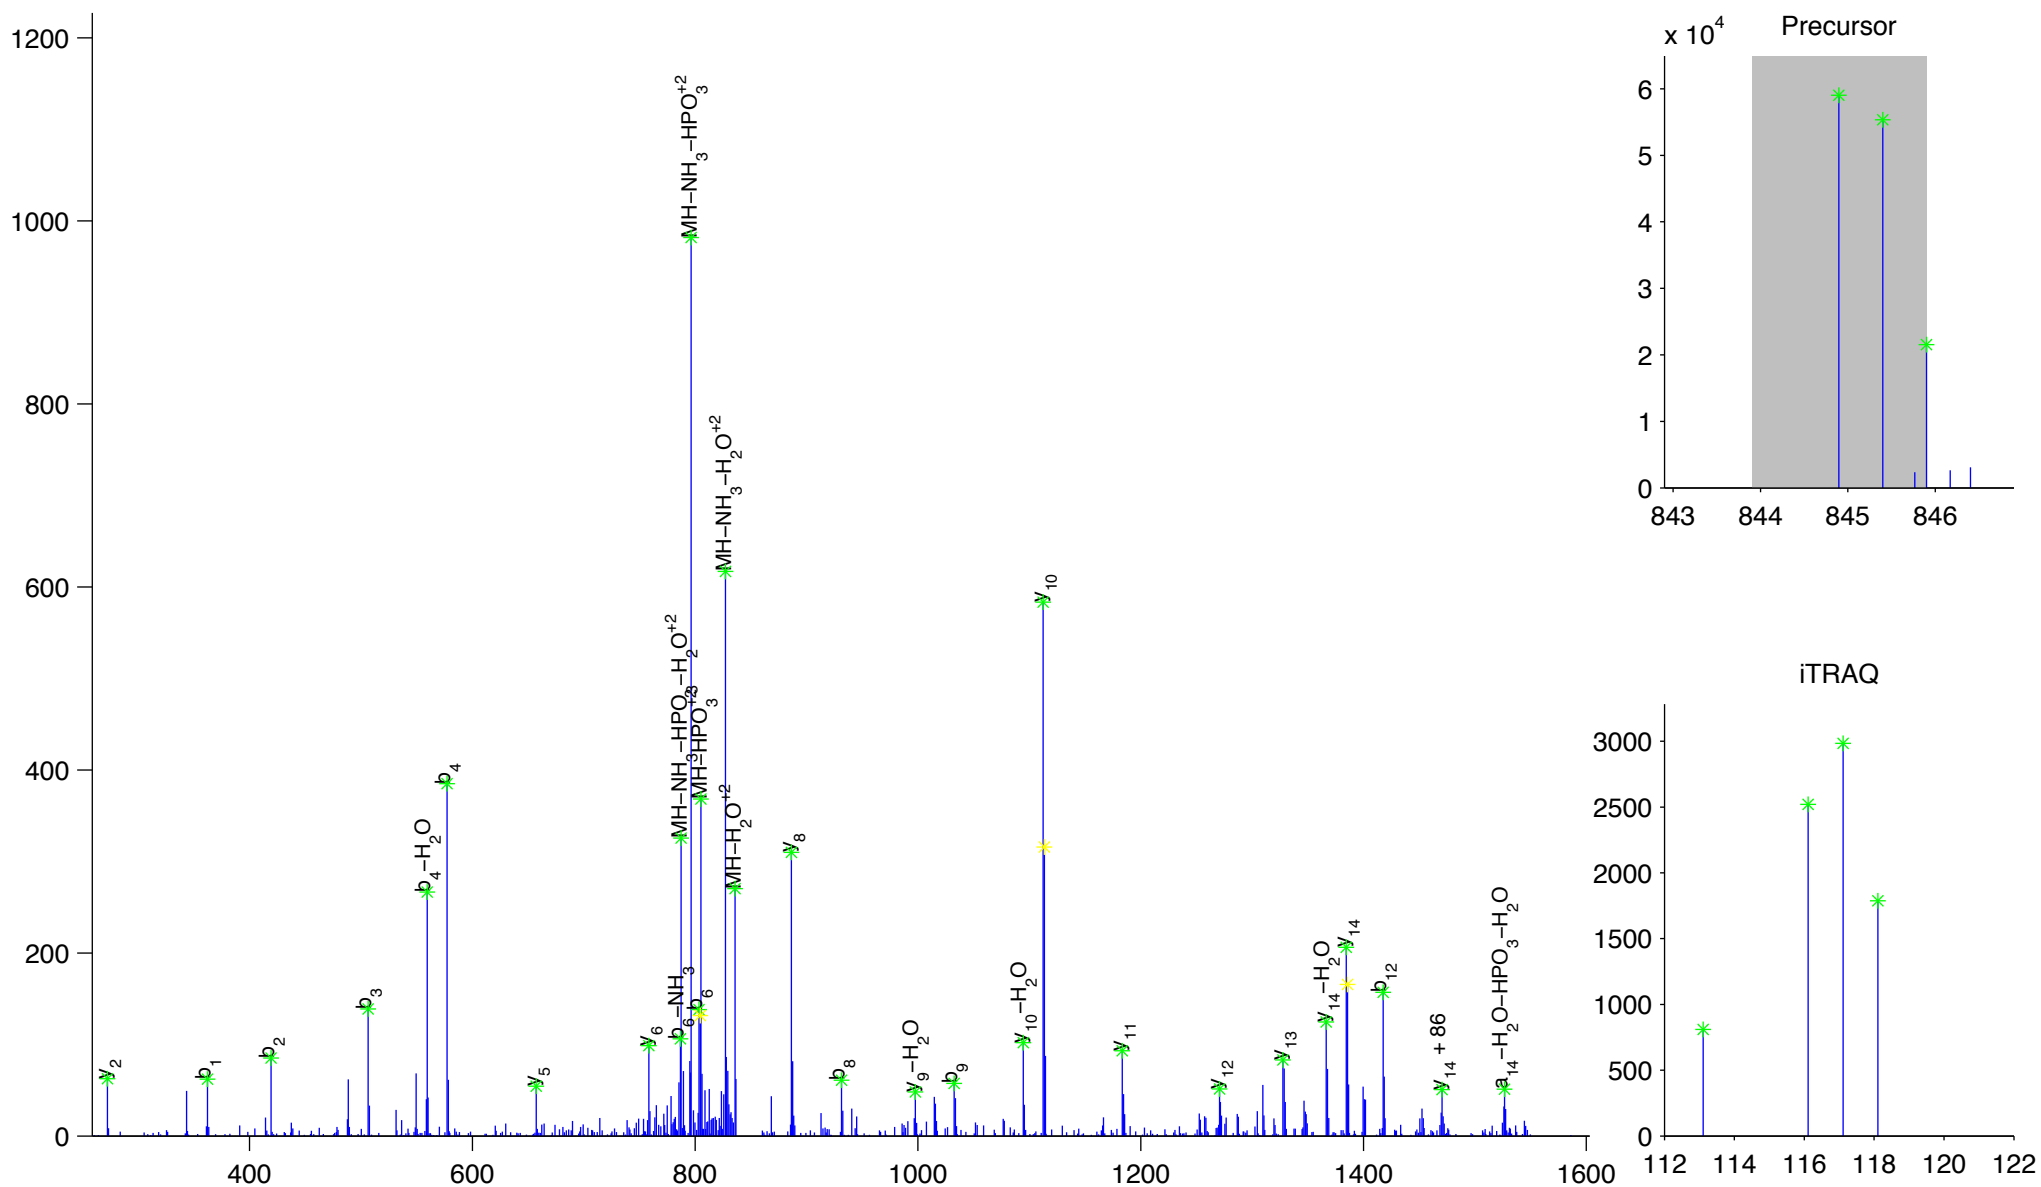

N [ A ] G [ N ] E [ Q ] D [ L ] G [ I ] Q [ y ] K

catenin, alpha 1 [Homo sapiens]

Charge State: +3

Scan Number: 5561

File Name: HJ050711\_GBMxeno\_bio1\_E\_HANNAH.raw

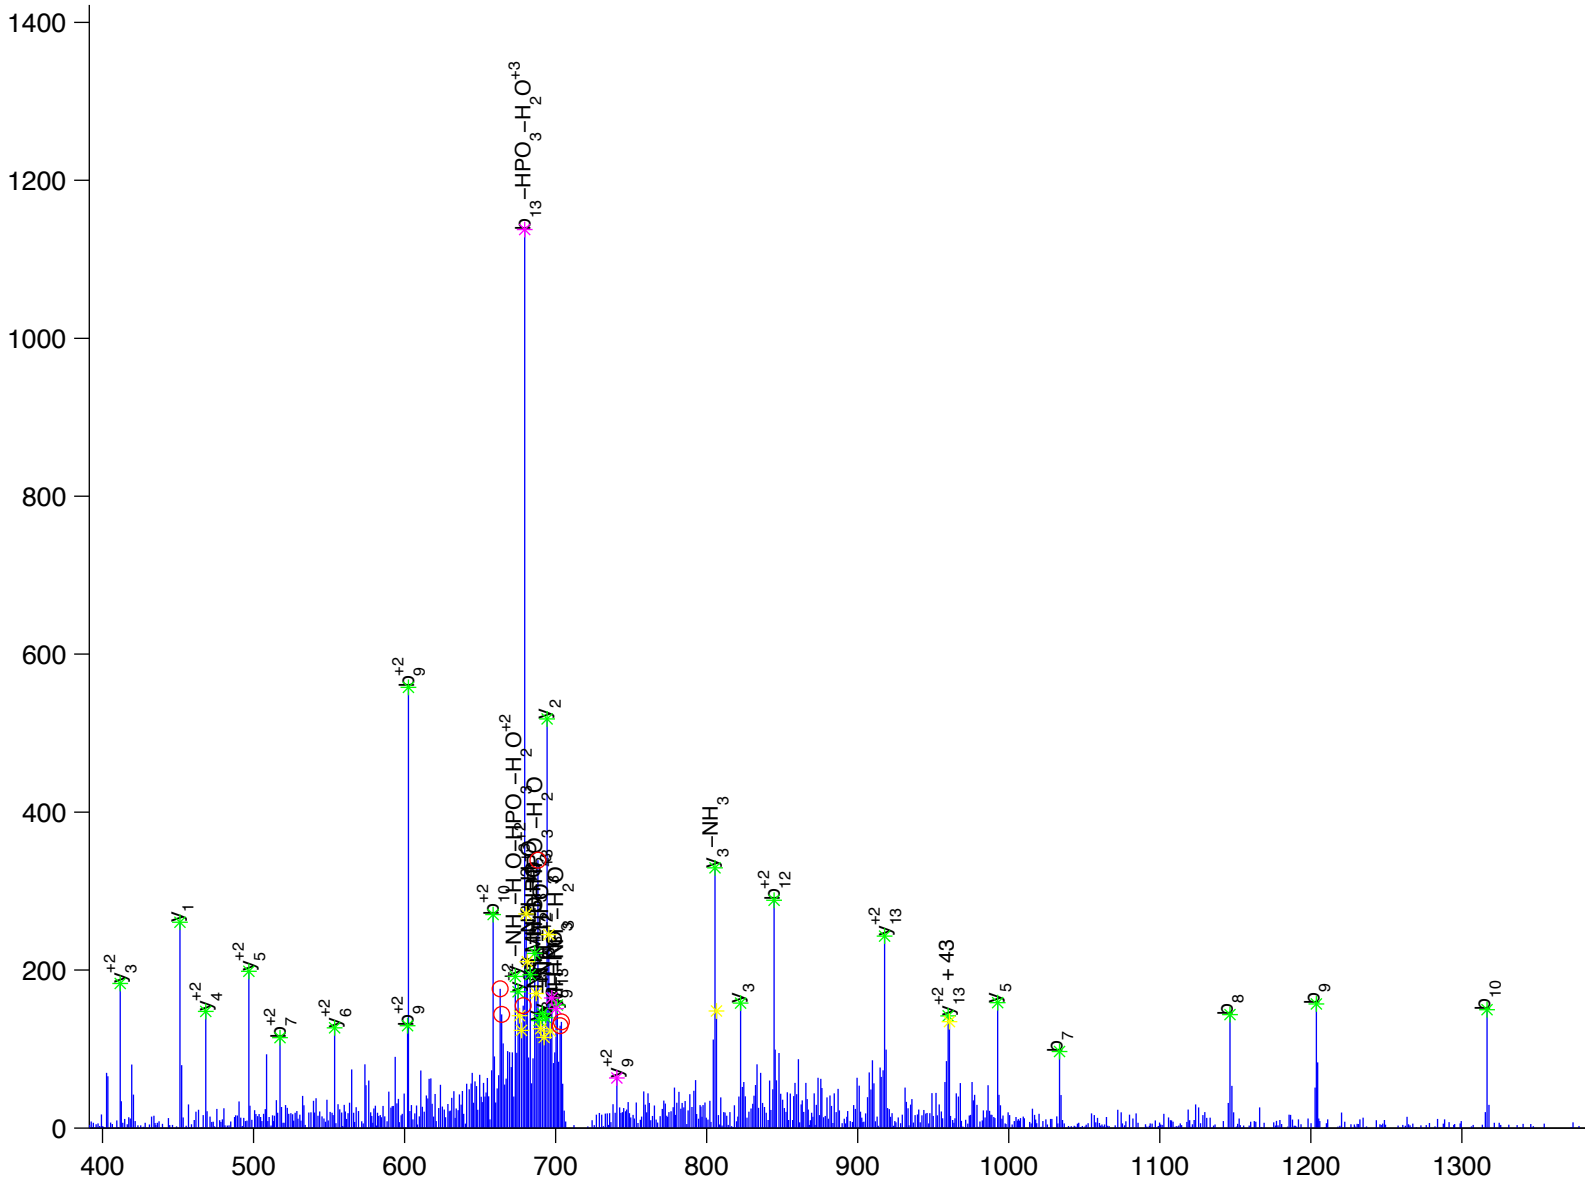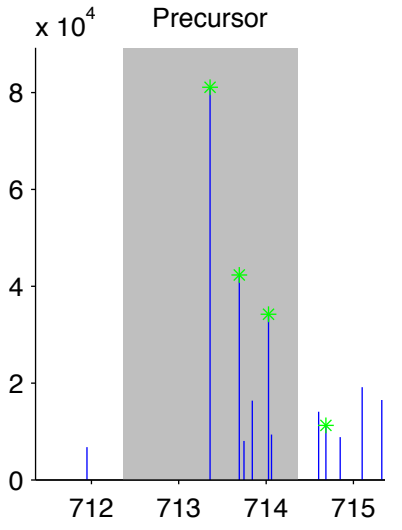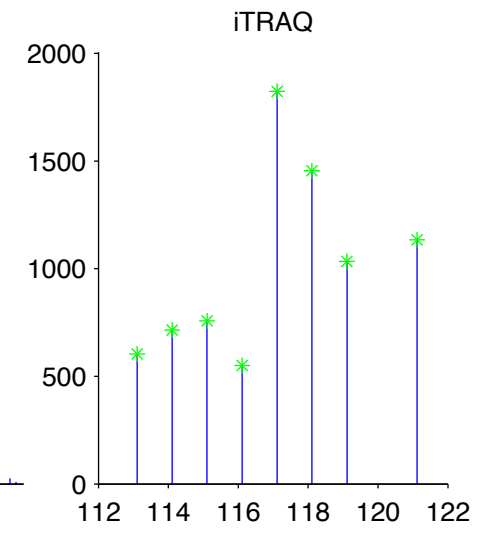

L [ V ] y [ D ] G [ I ] R

catenin, alpha 1 [Homo sapiens]

Charge State: +2

Scan Number: 6710

File Name: HJ050711\_GBMxeno\_bio1\_E\_HANNAH.raw

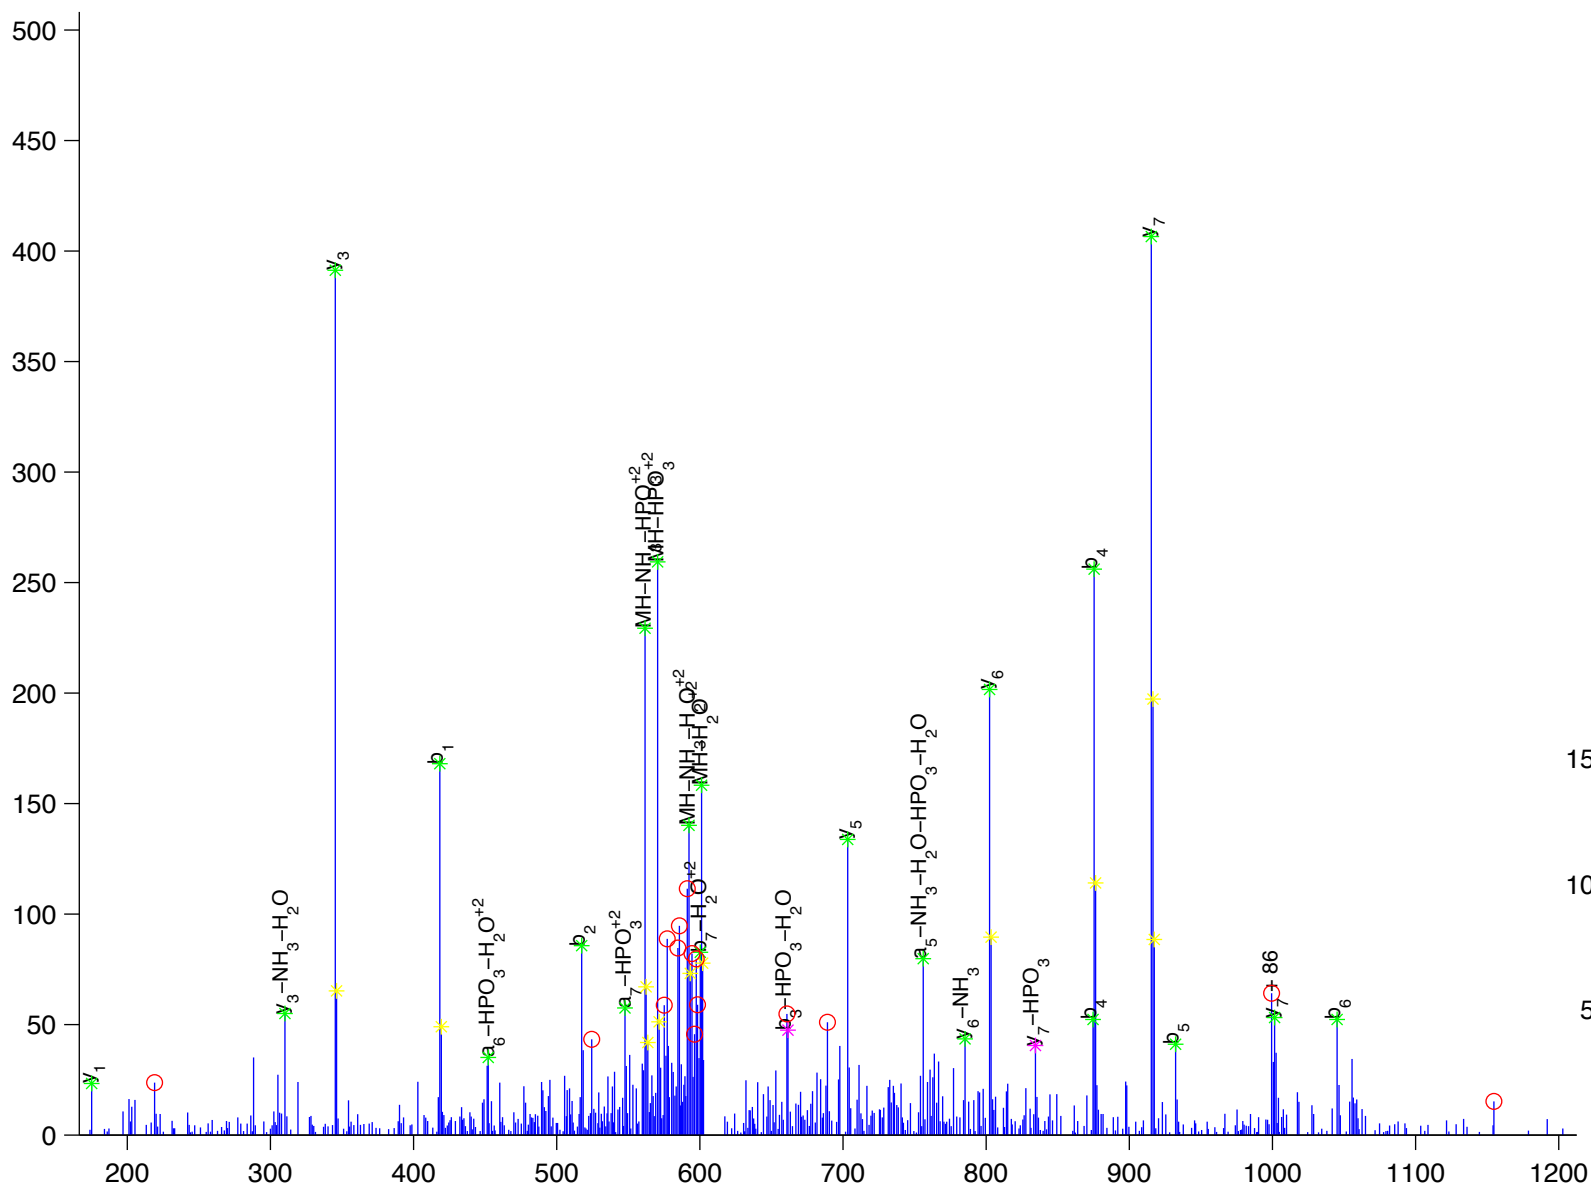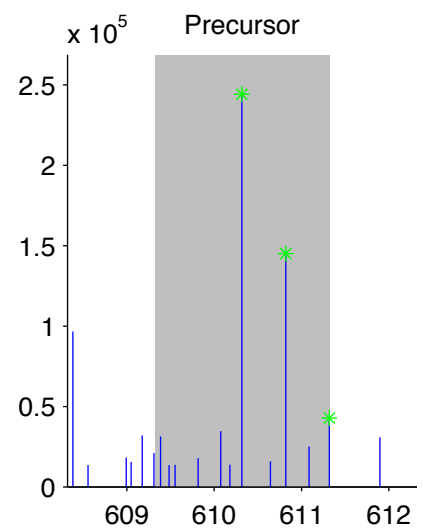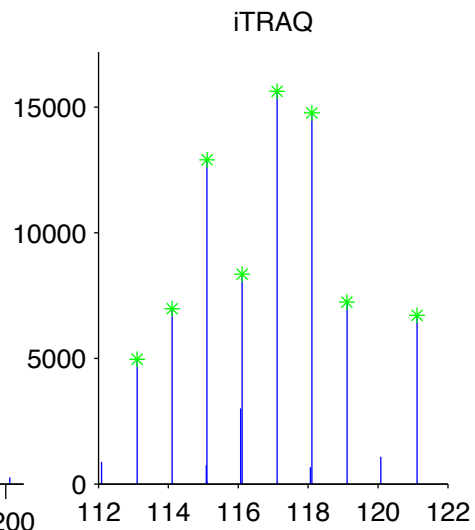

S [ L [ D [ N [ N ] y ] S [ T [ P [ N ] E ] ] R

catenin, delta 1 isoform 1A [Homo sapiens]

Charge State: +2

Scan Number: 3438

File Name: HJ050711\_GBMxeno\_bio1\_E\_HANNAH.raw

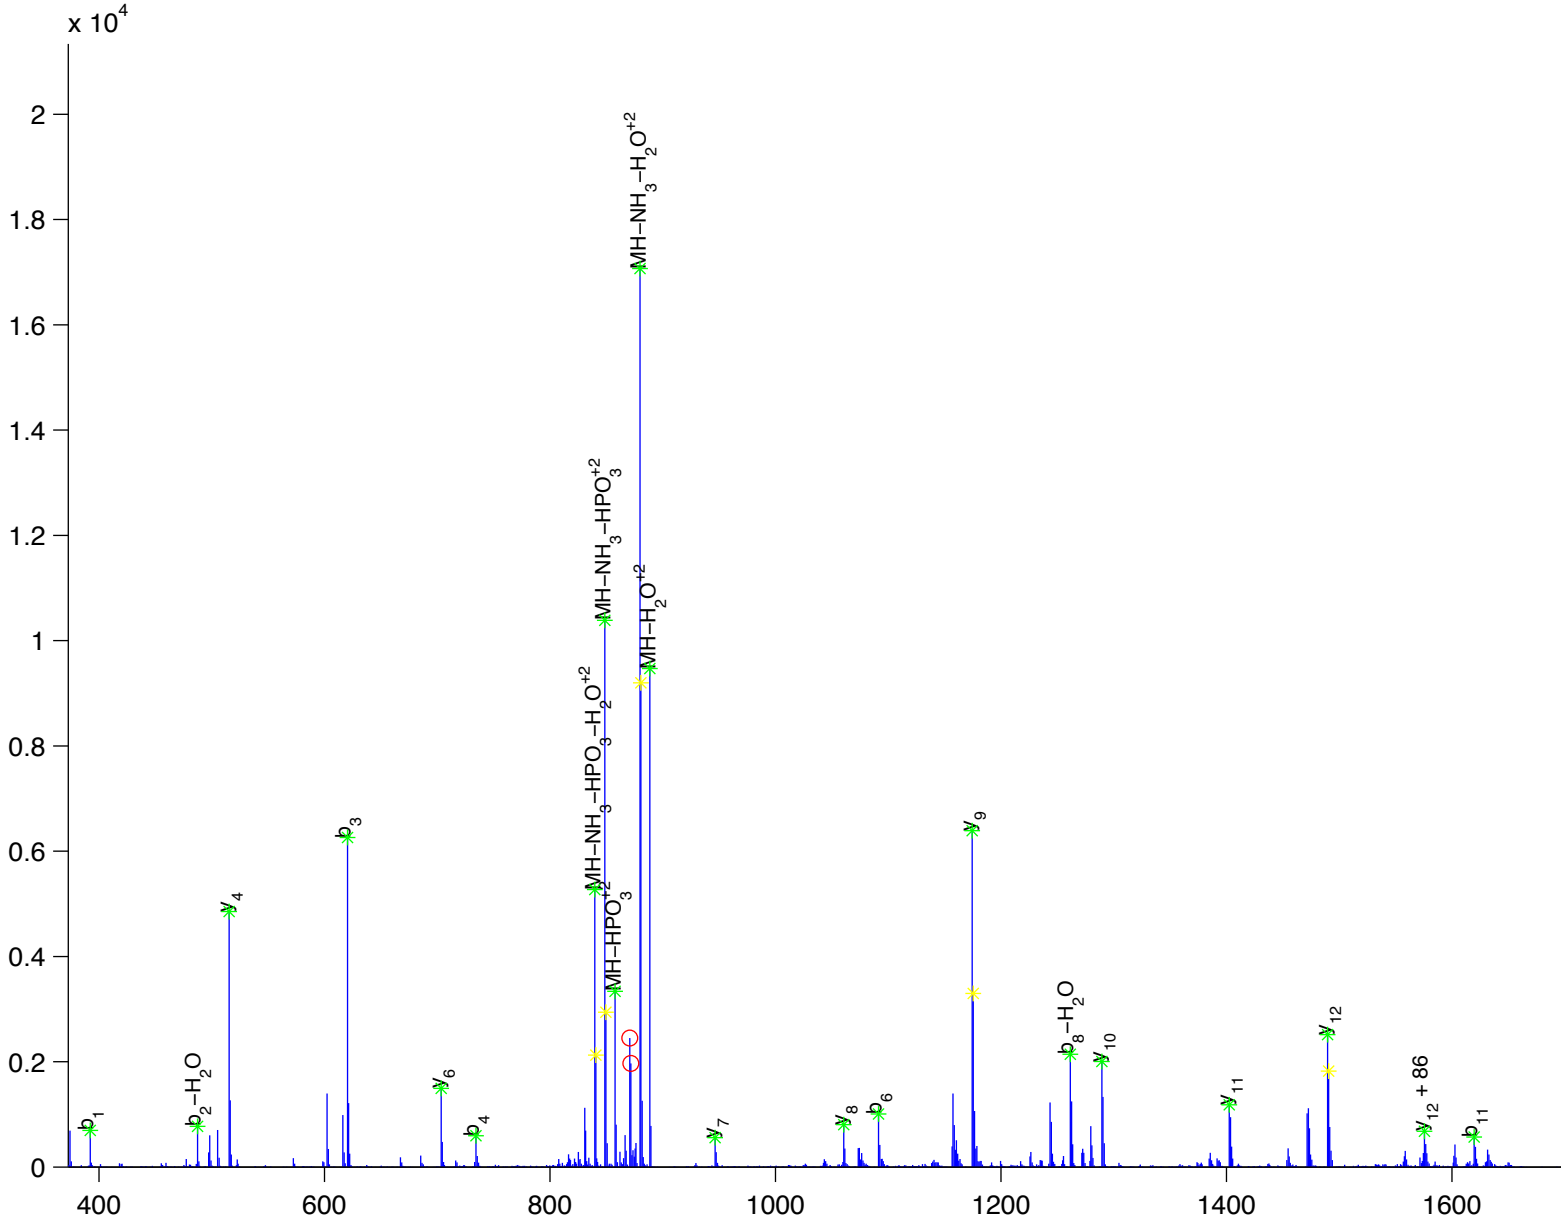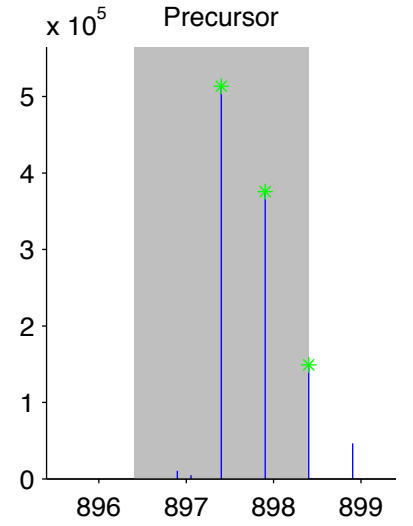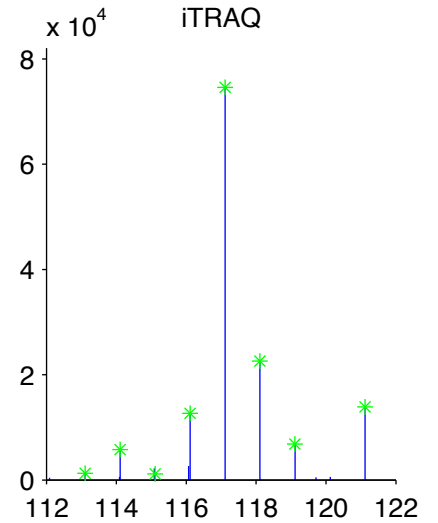



Q [ D ] V [ y ] G [ P ] Q [ P ] Q [ V ] R

catenin, delta 1 isoform 1A [Homo sapiens]

Charge State: +3

Scan Number: 3875

File Name: HJ050711\_GBMxeno\_bio1\_E\_HANNAH.raw

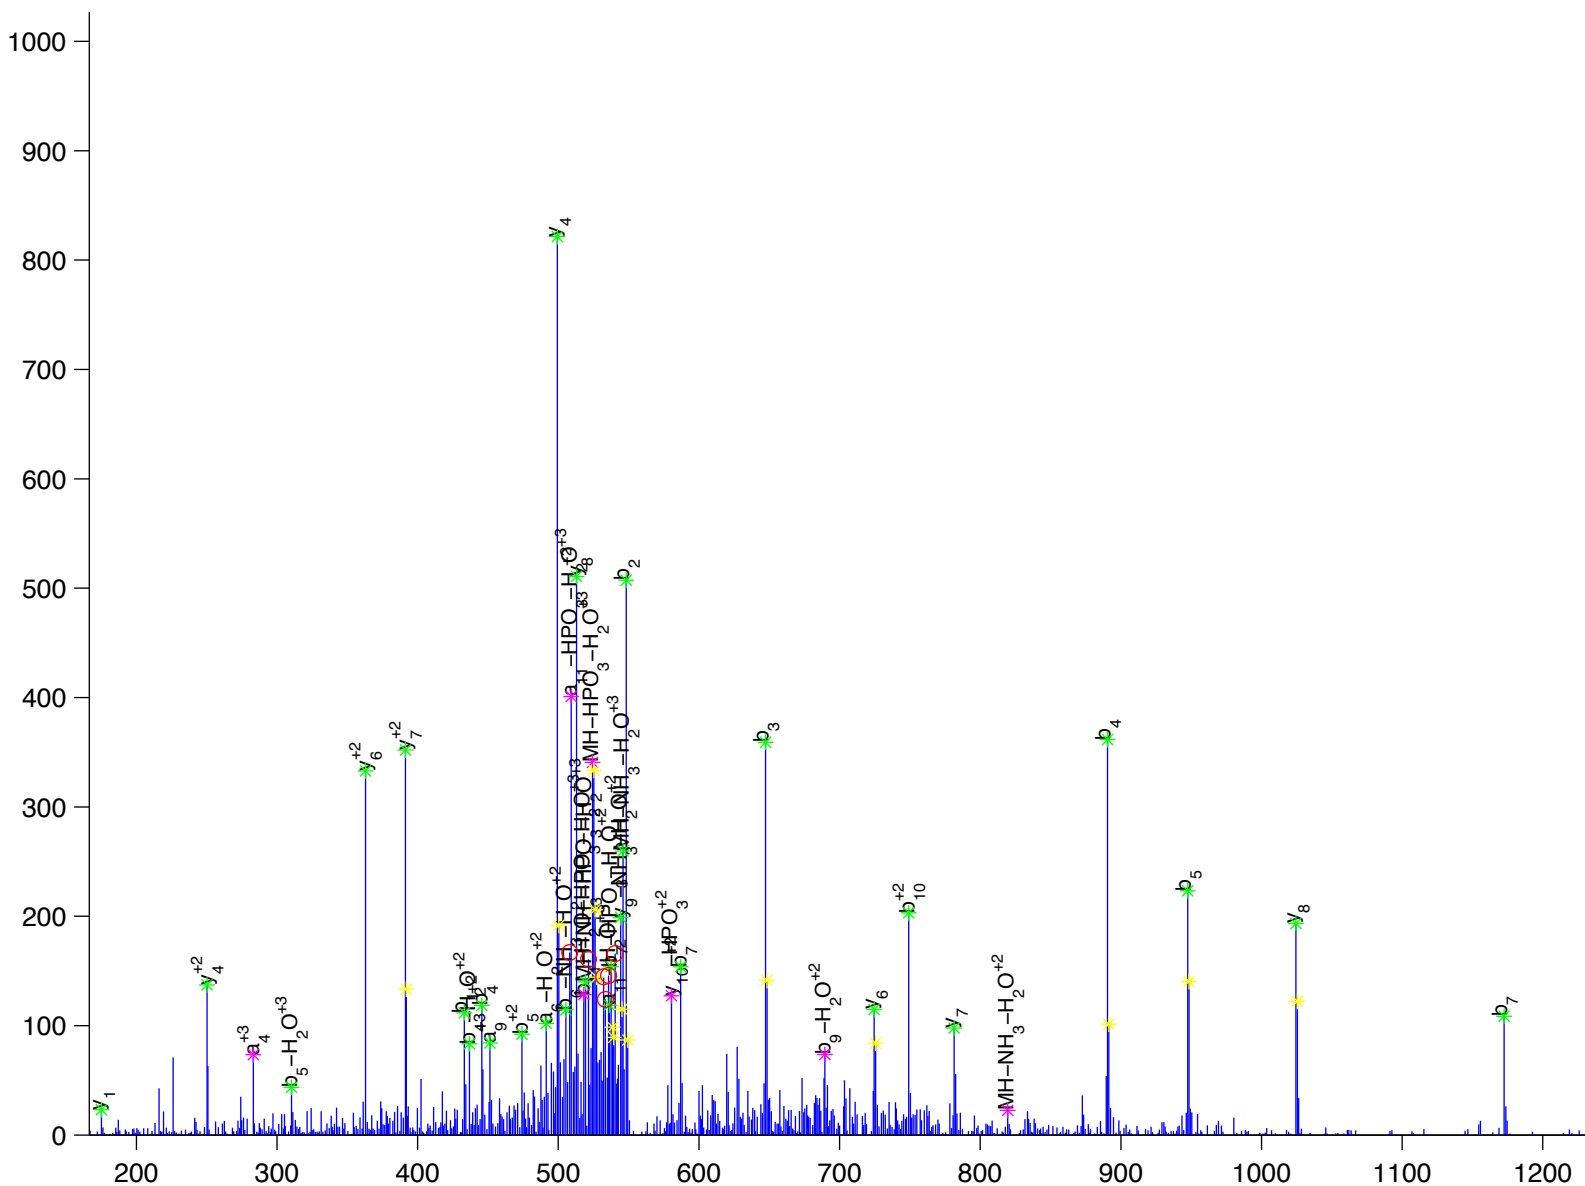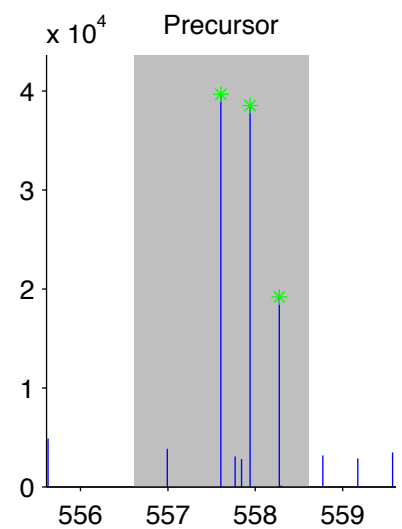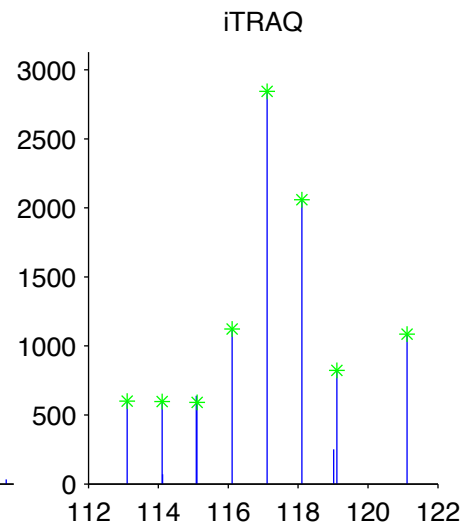

I [G] [E] [G] [T] y [G] [V] [V] [Y] K

cell division cycle 2 protein isoform 1 [Homo sapiens]

Charge State: +3

Scan Number: 6429

File Name: HJ050711\_GBMxeno\_bio1\_E\_HANNAH.raw

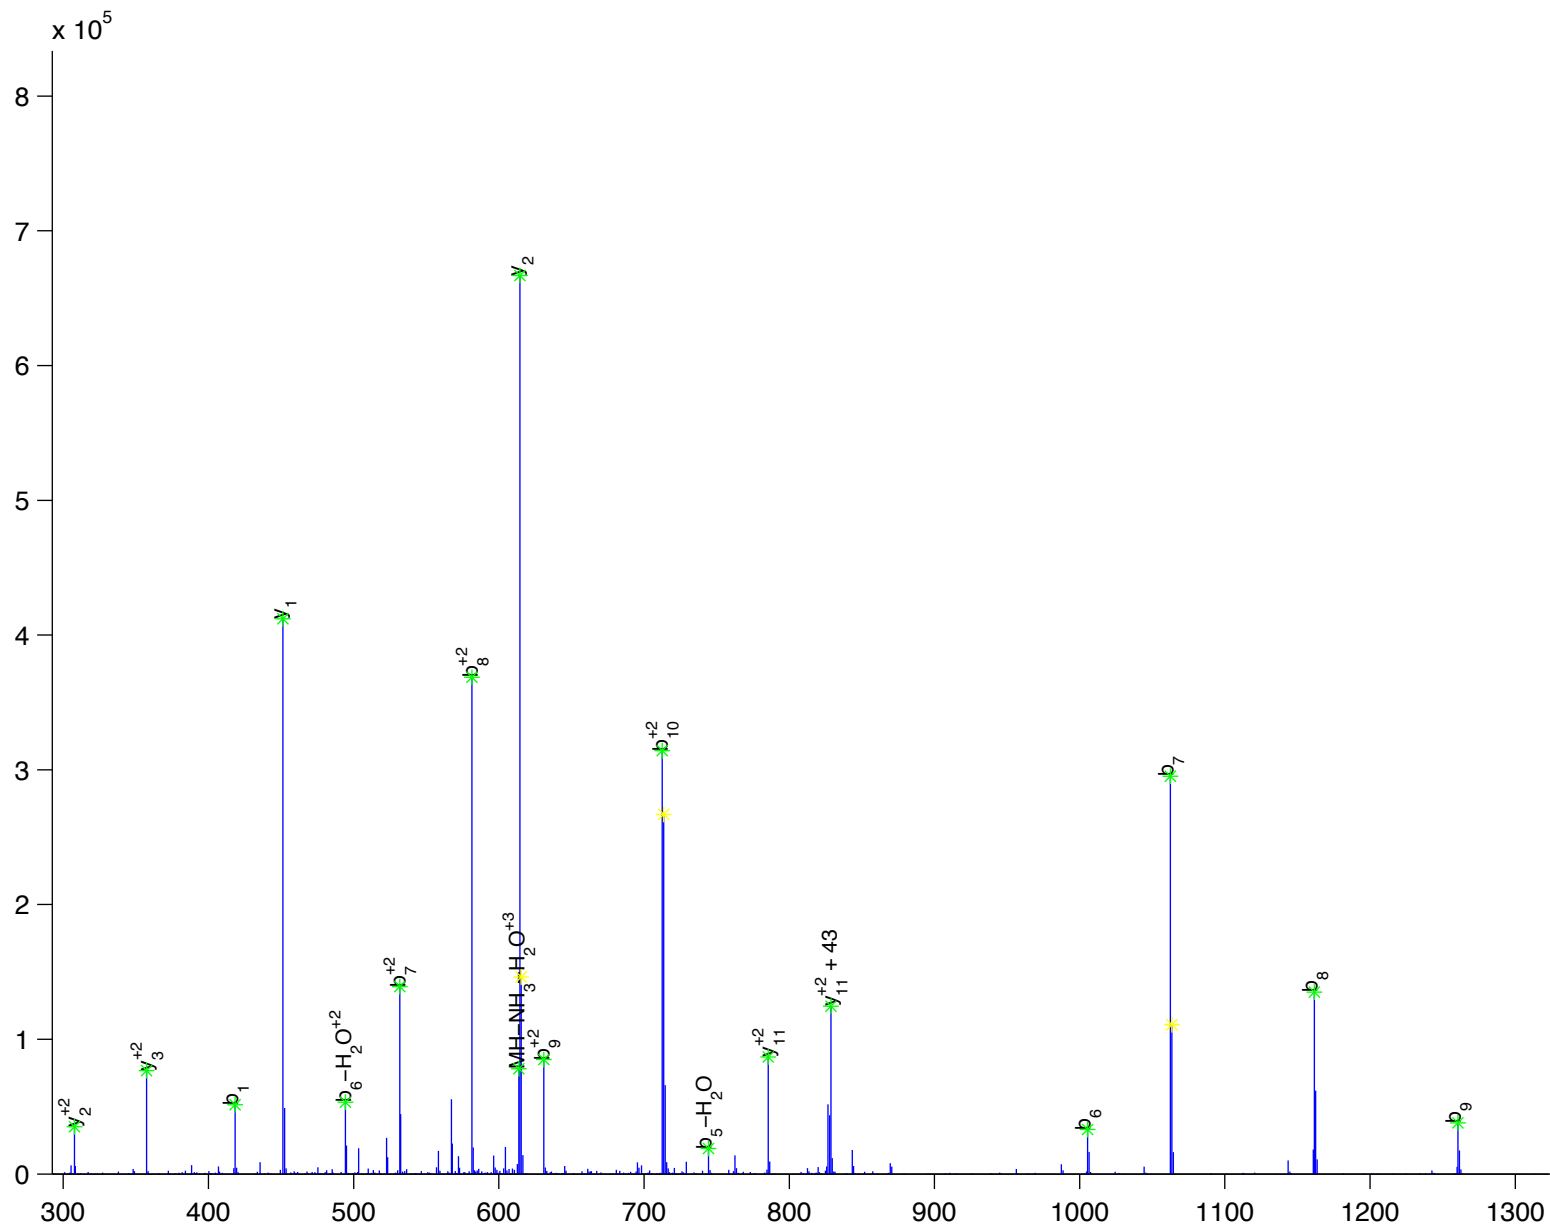

I [G] [E] [G] [T] y [G] [V] [V] [Y] [K]

cell division cycle 2 protein isoform 1 [Homo sapiens]

Charge State: +2

Scan Number: 6431

File Name: HJ050711\_GBMxeno\_bio1\_E\_HANNAH.raw

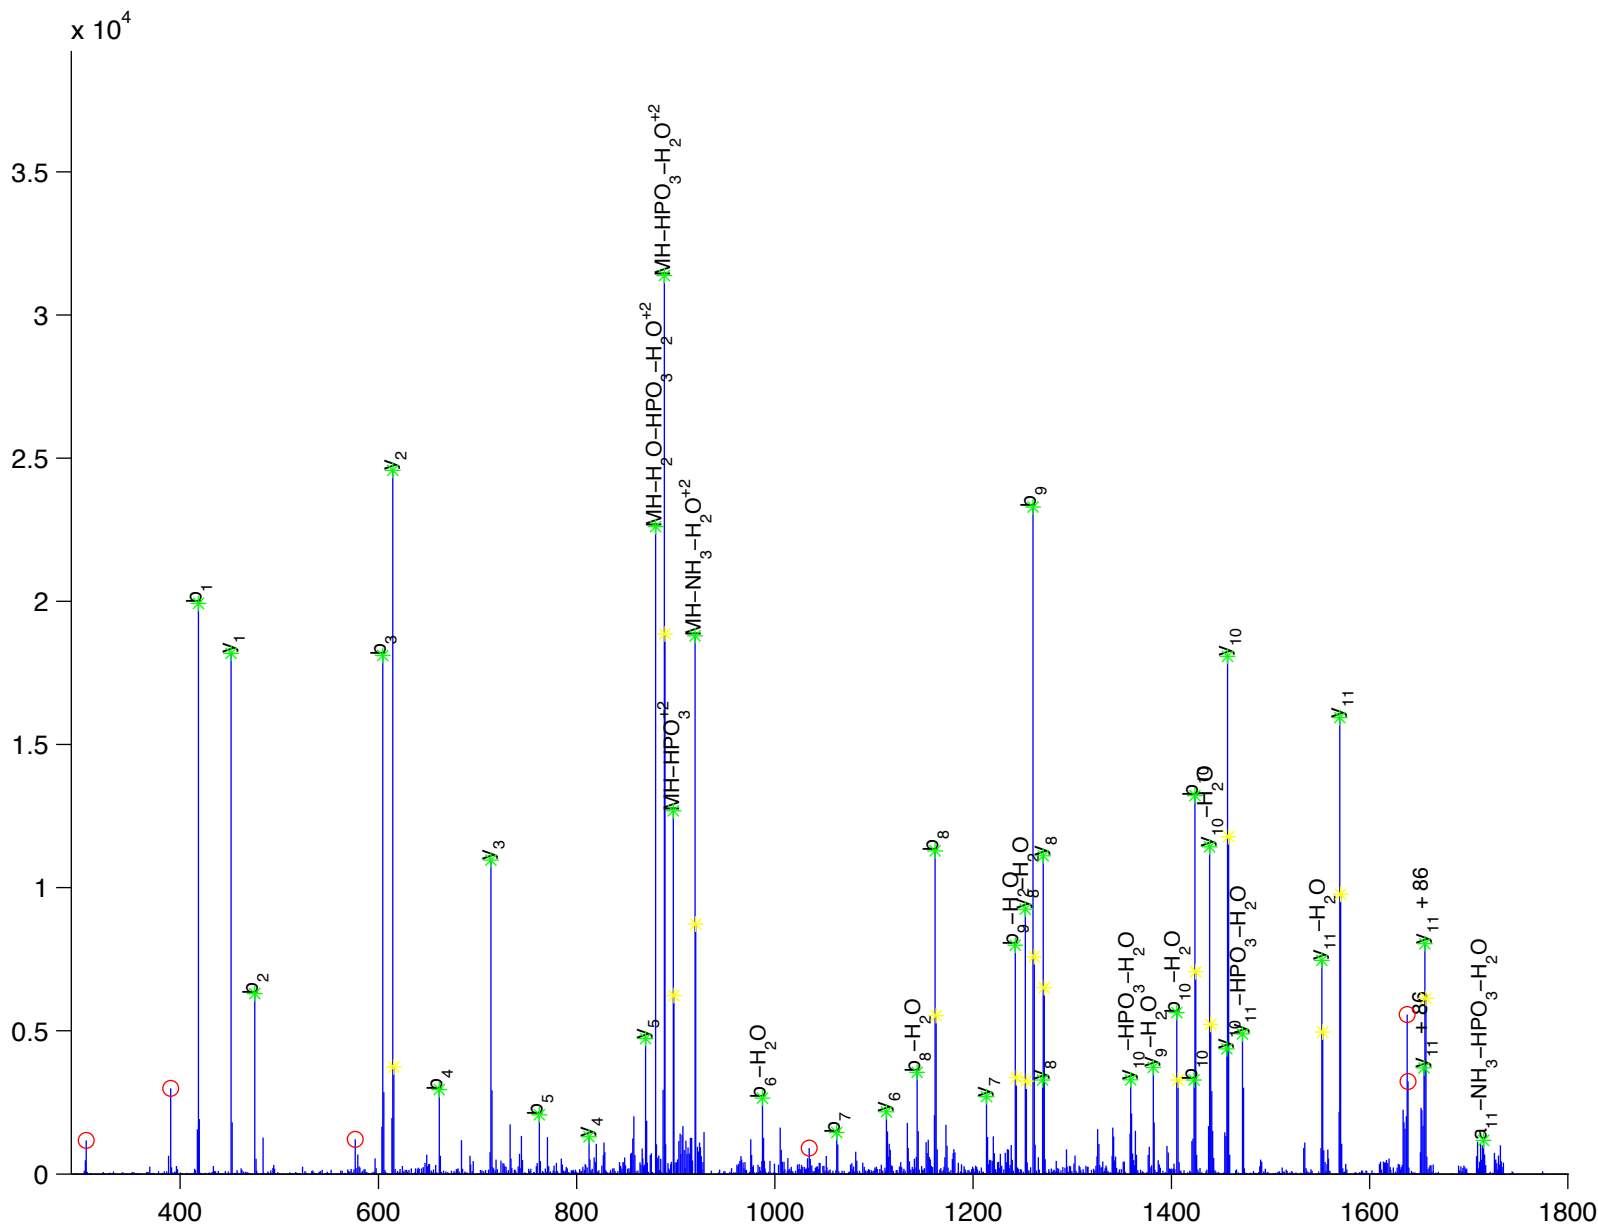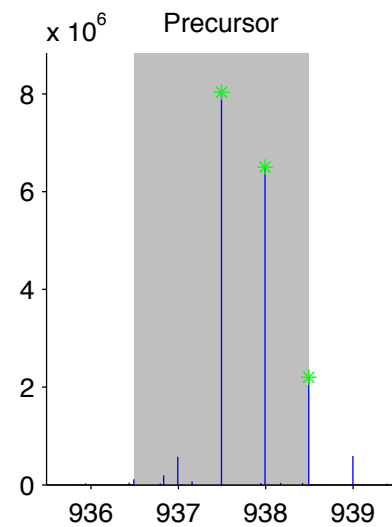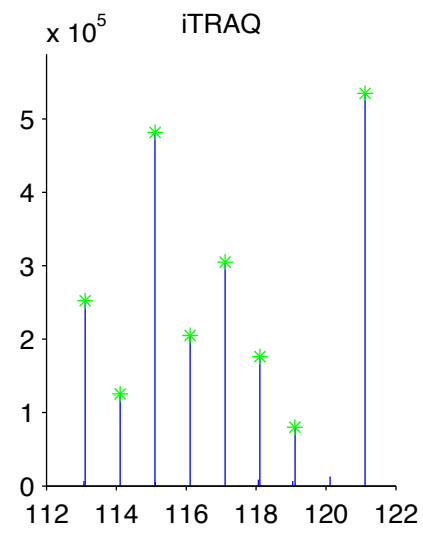



I [G] [E] [G] [T] y [G] [V] [V] [Y] K

cell division cycle 2 protein isoform 1 [Homo sapiens]

Charge State: +2

Scan Number: 6433

File Name: HJ050711\_GBMxeno\_bio1\_E\_HANNAH.raw

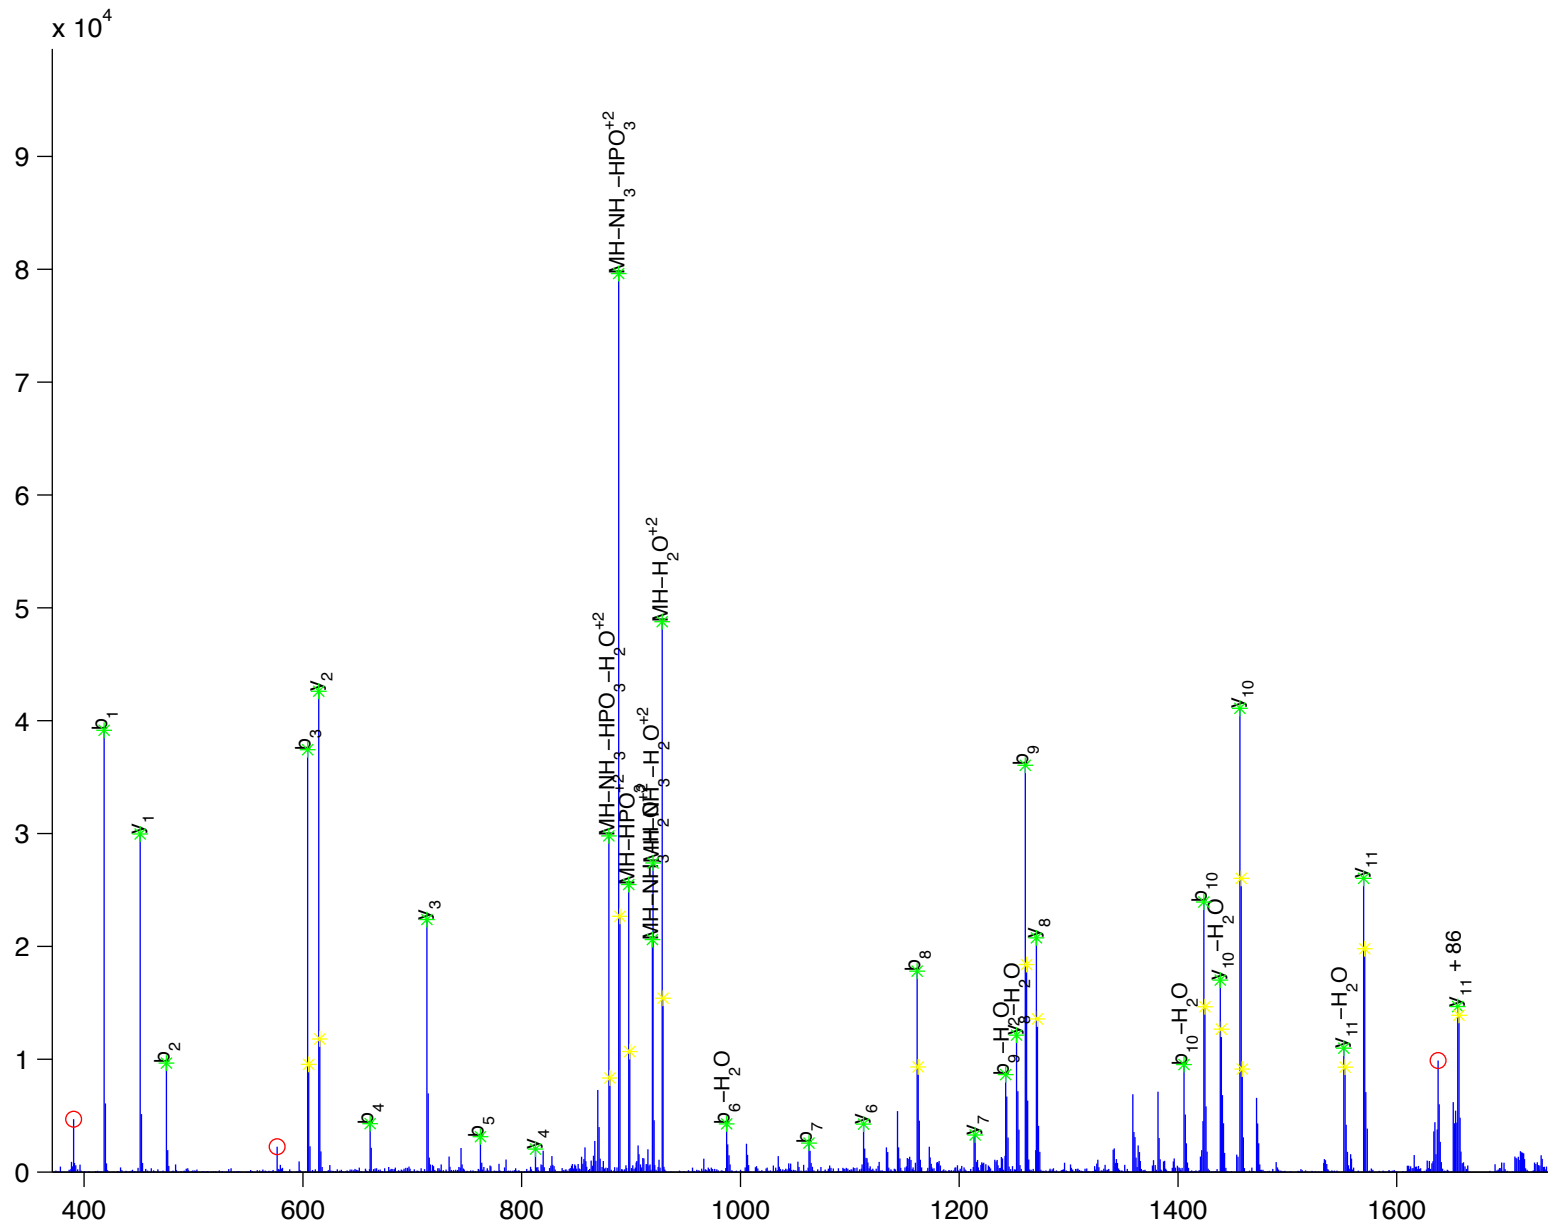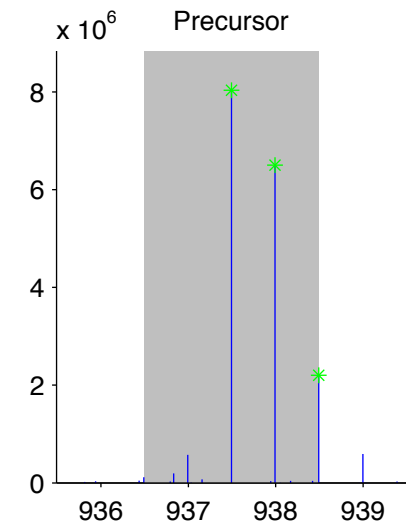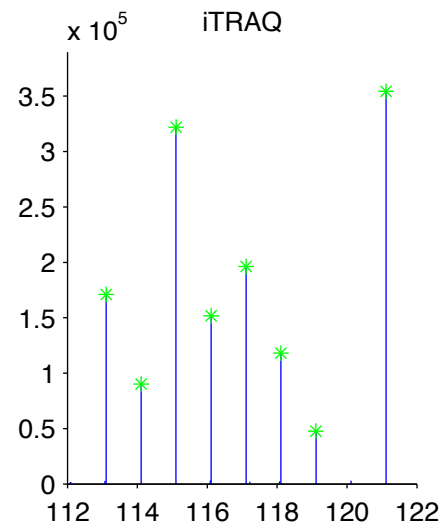

E [ N ] S [ E ] E [ L ] Q [ L ] P [ E ] N [ P ] y [ A ] Q [ P ] S [ P ] I [ R ]

cingulin-like 1 [Homo sapiens]

Charge State: +3

Scan Number: 7059

File Name: HJ050711\_GBMxeno\_bio1\_E\_HANNAH.raw

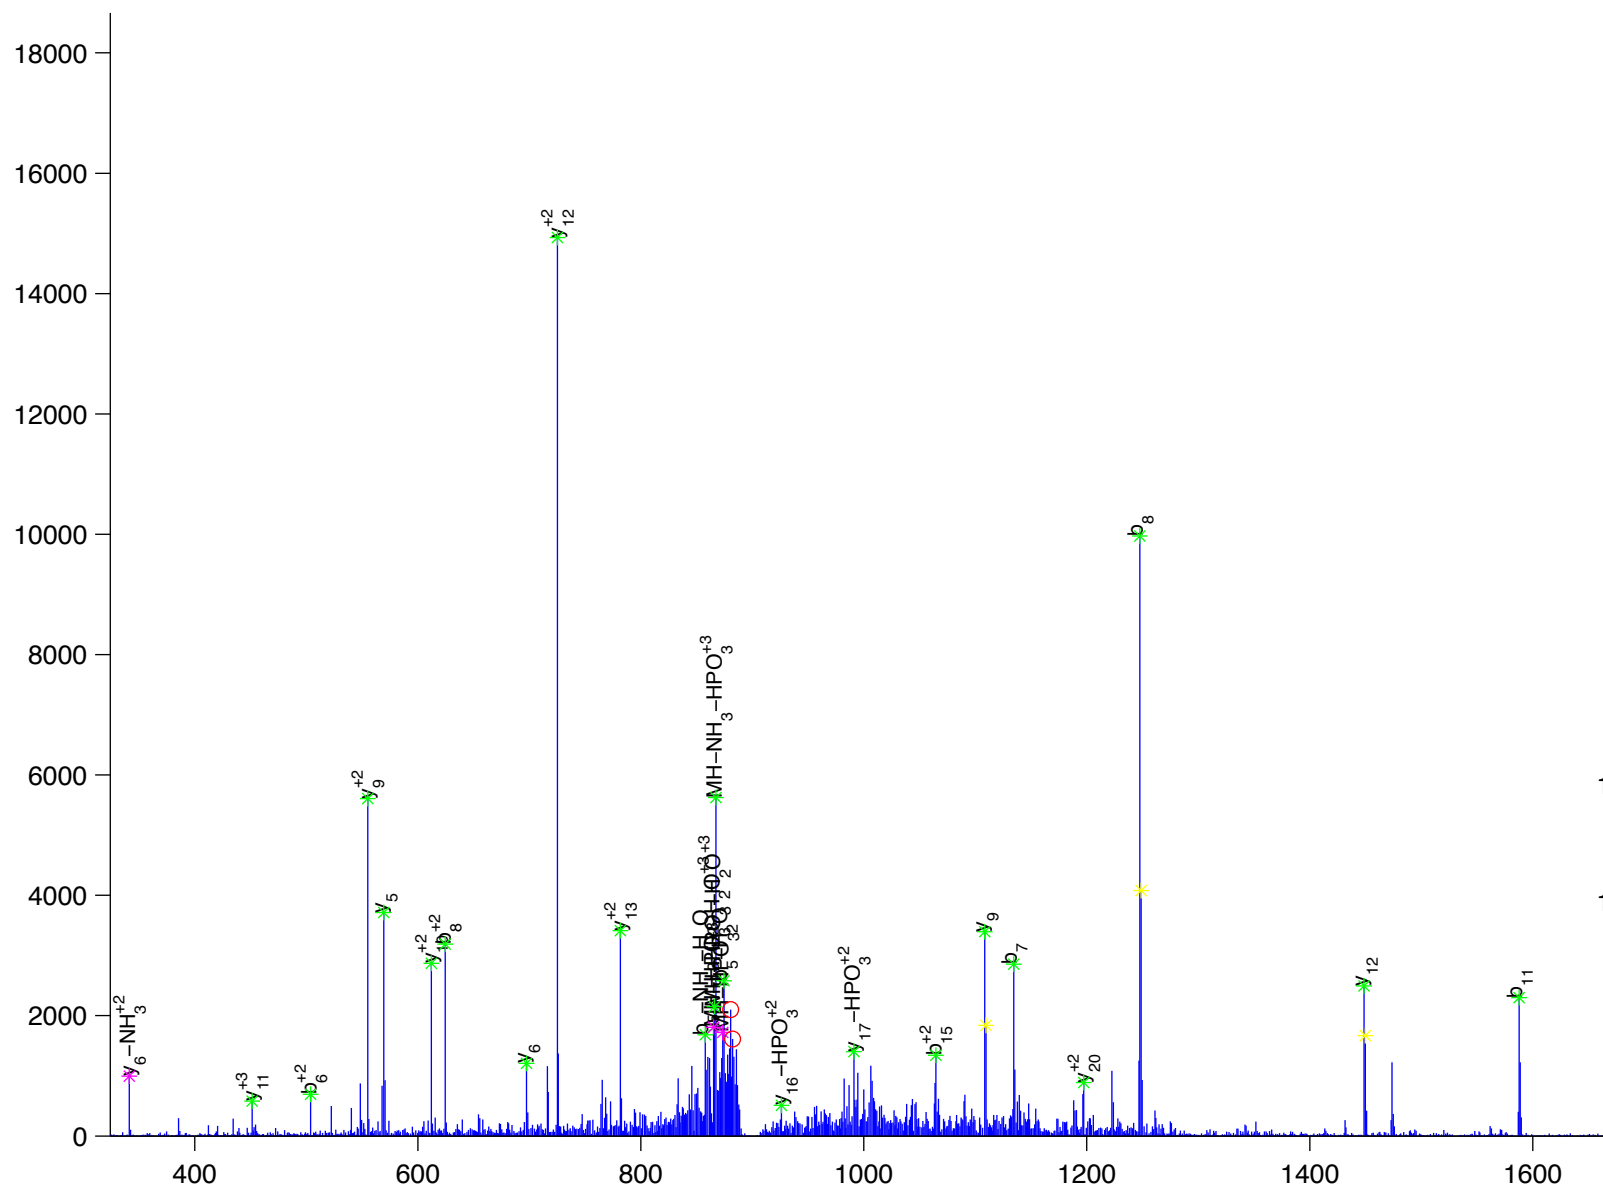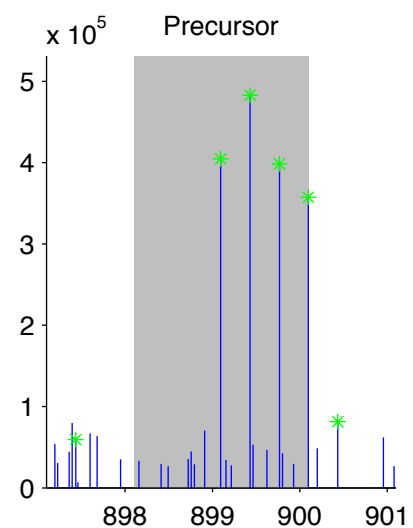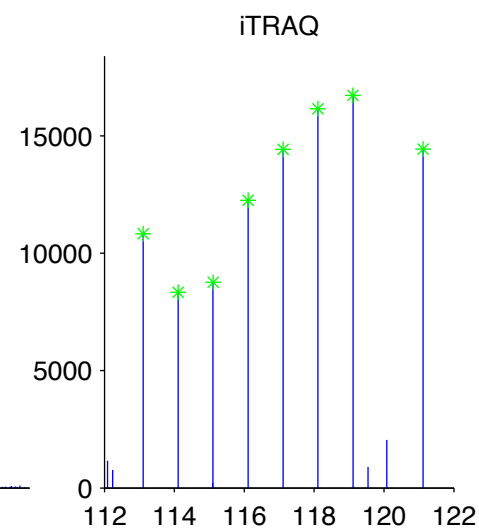

E [ N ] P [ Y ] y [ D ] S [ R ]

clathrin heavy chain 1 [Homo sapiens]

Charge State: +2

Scan Number: 3027

File Name: HJ050711\_GBMxeno\_bio1\_E\_HANNAH.raw

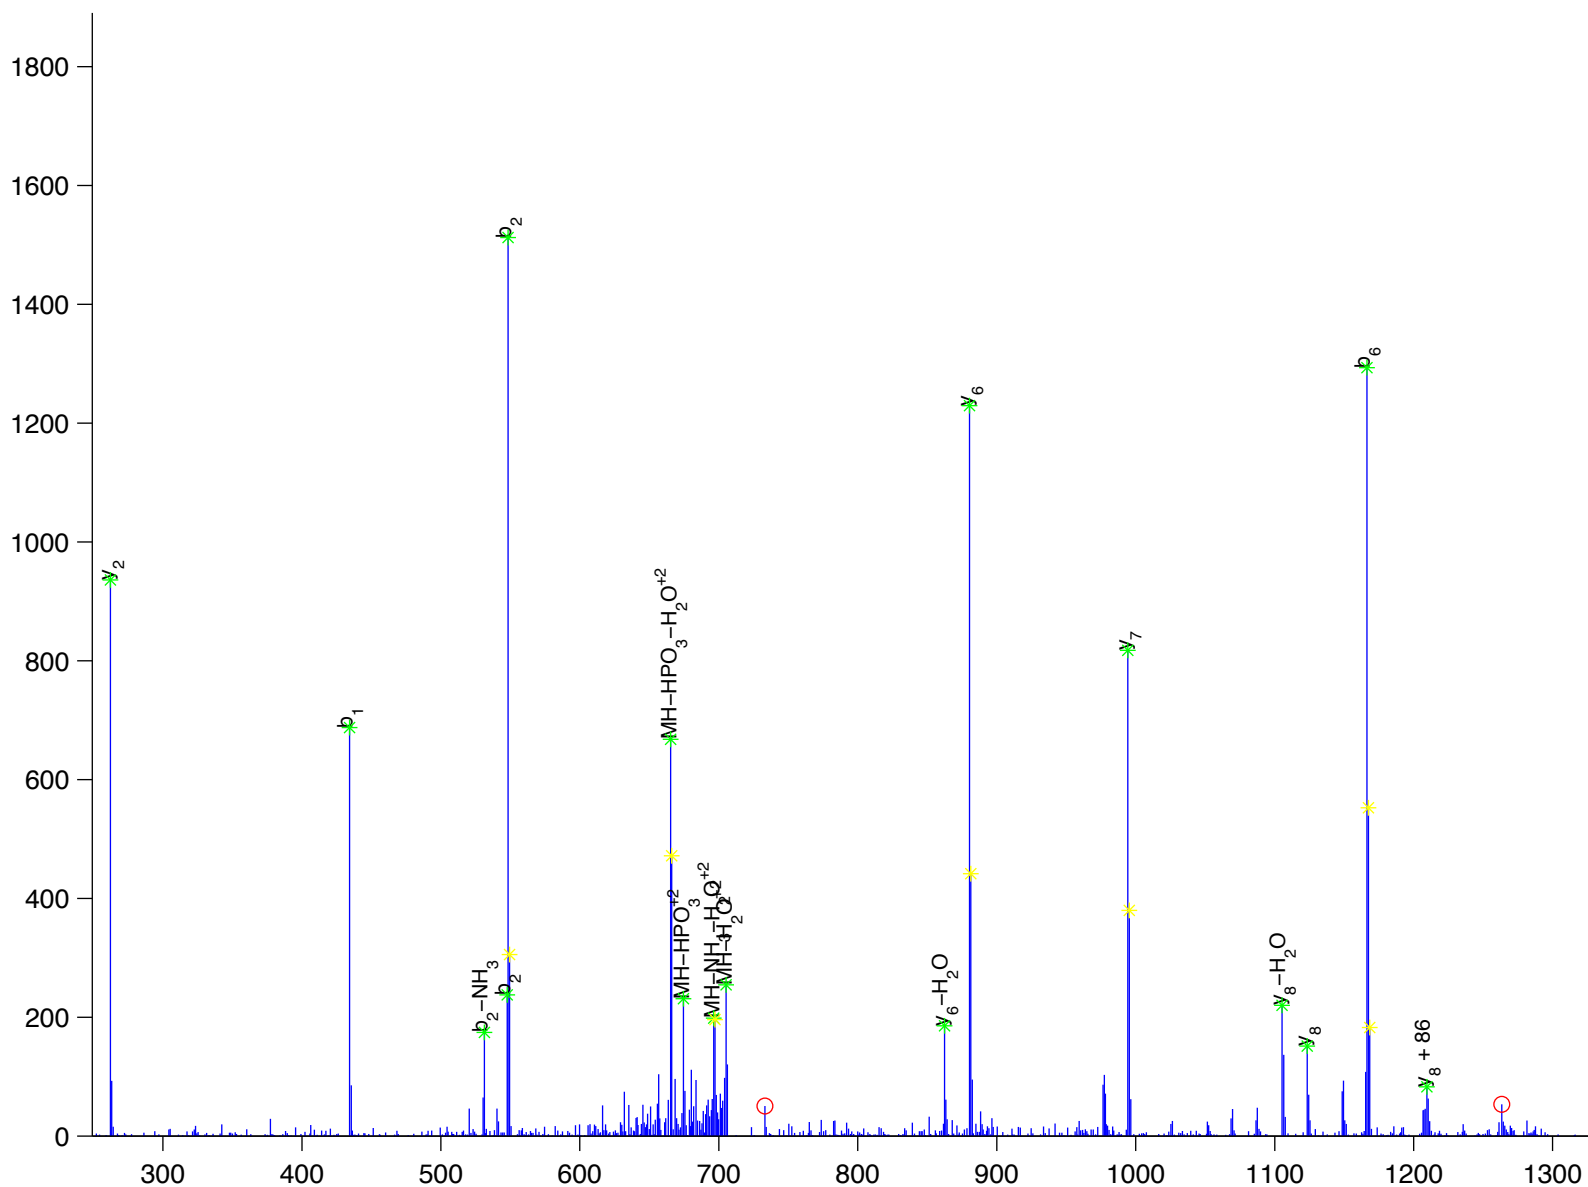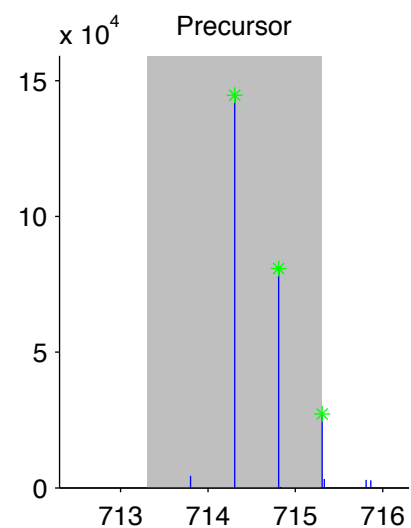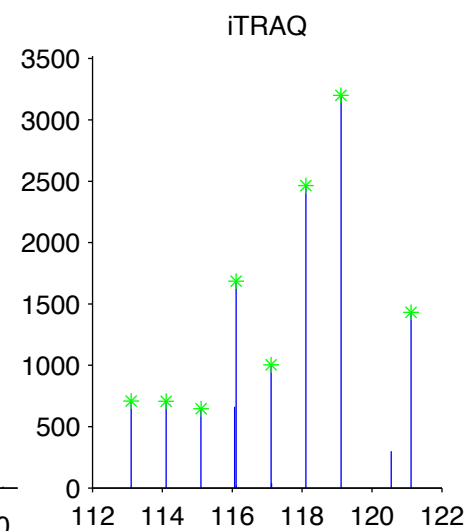

H [ E ] L [ Q ] A [ N ] c [ y ] E [ E ] V [ K ] [ D ] R

cofilin 1 (non-muscle) [Homo sapiens]

Charge State: +4

Scan Number: 4121

File Name: HJ050711\_GBMxeno\_bio1\_E\_HANNAH.raw

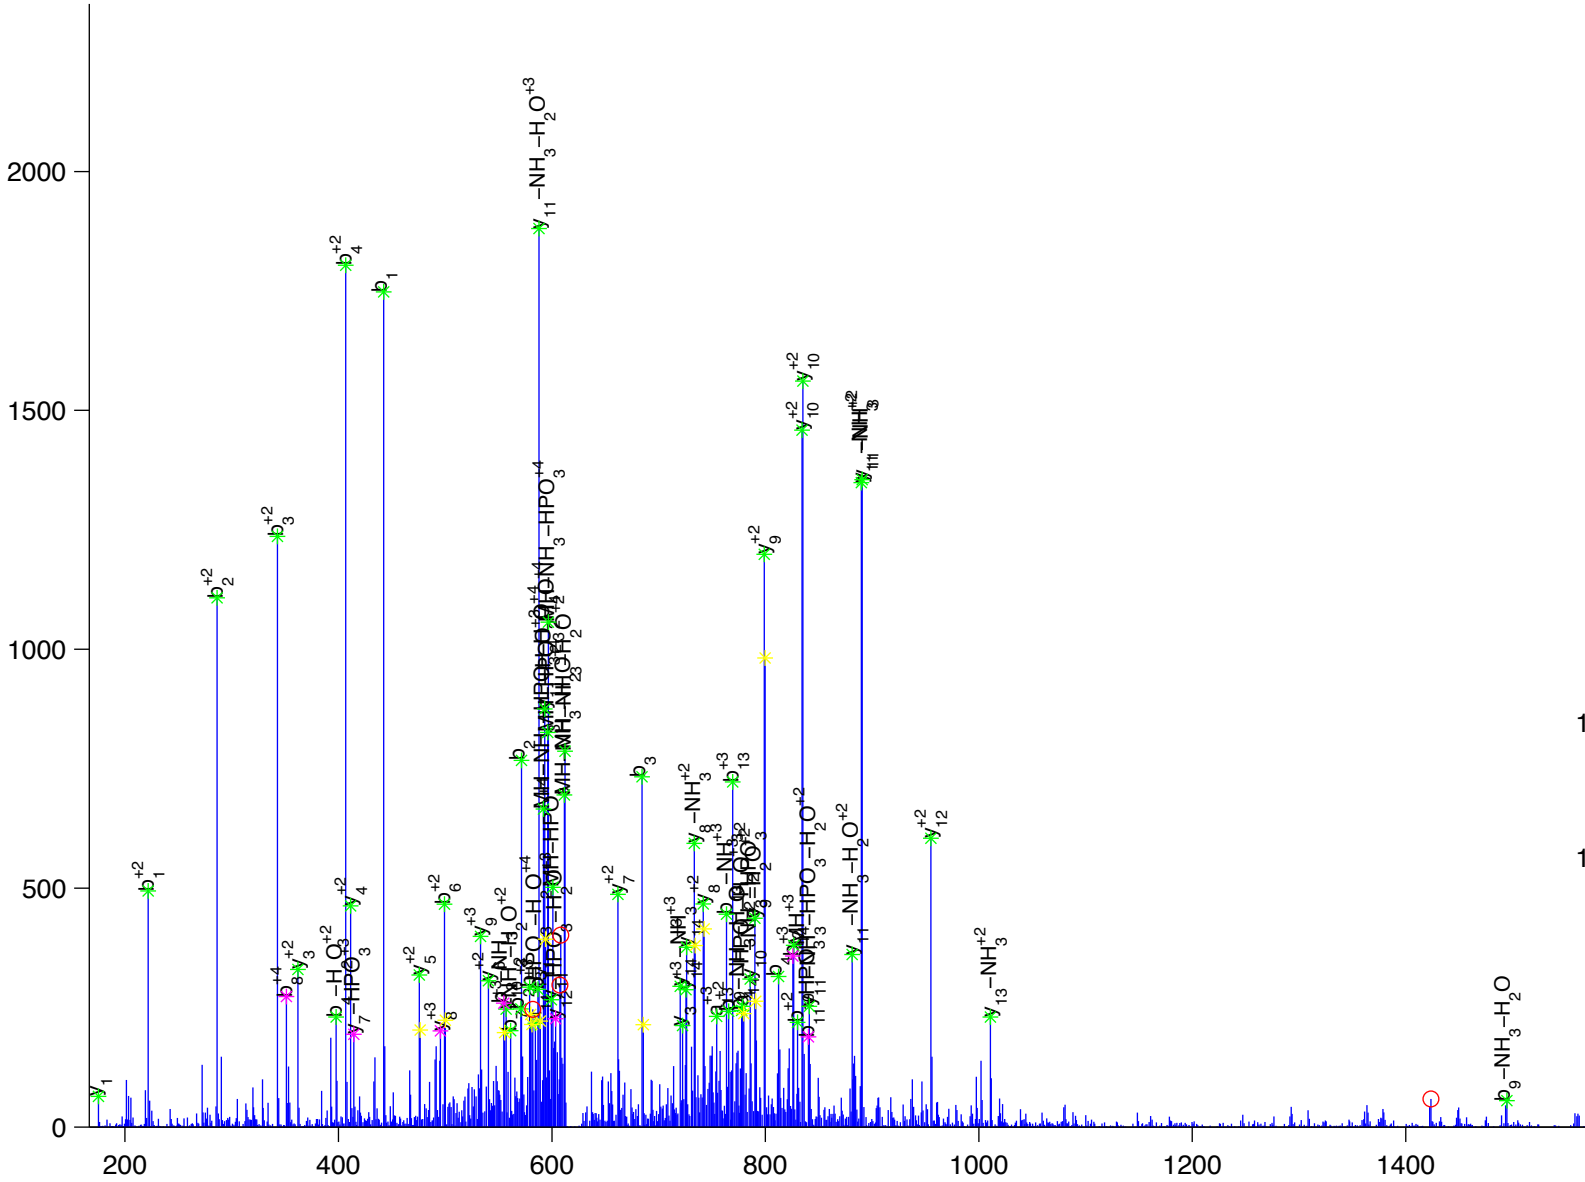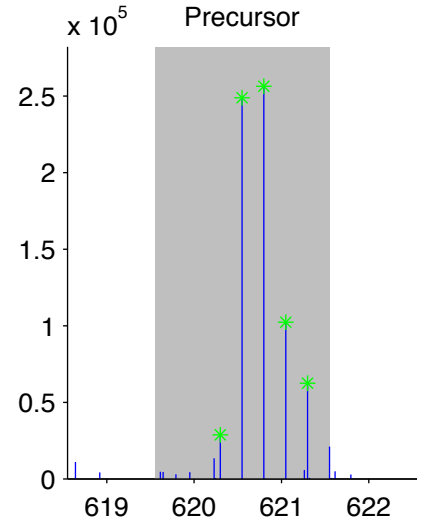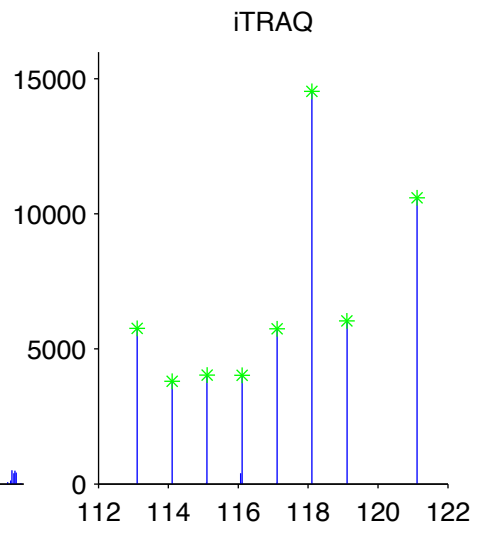

H [ E ] L [ Q ] A [ N ] c [ y ] E [ E ] V [ K ] D [ R ]

cofilin 1 (non-muscle) [Homo sapiens]

Charge State: +4

Scan Number: 4287

File Name: HJ050711\_GBMxeno\_bio1\_E\_HANNAH.raw

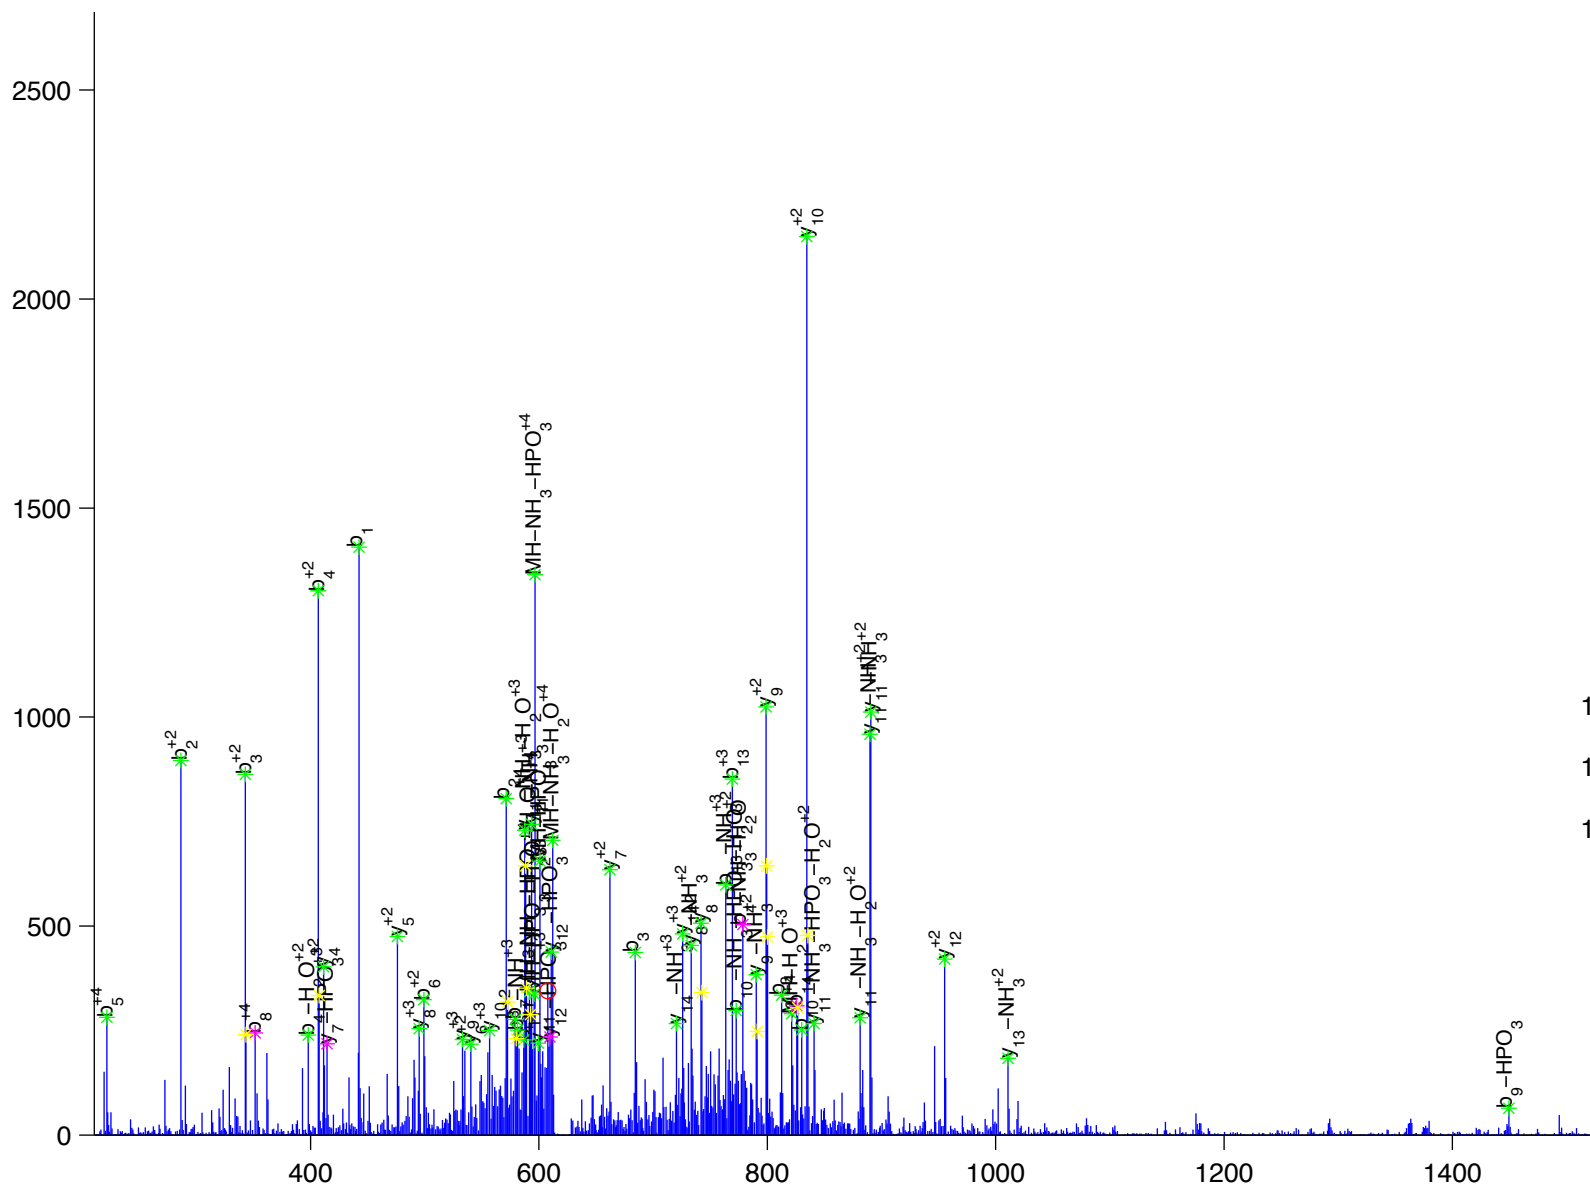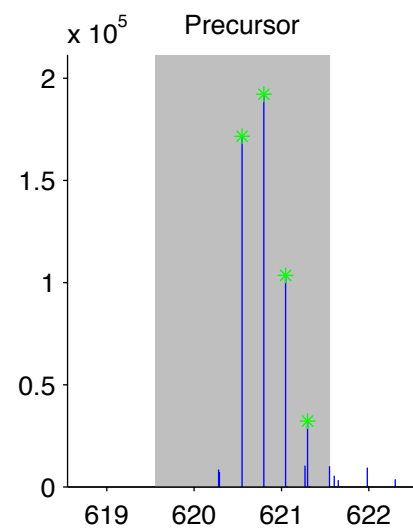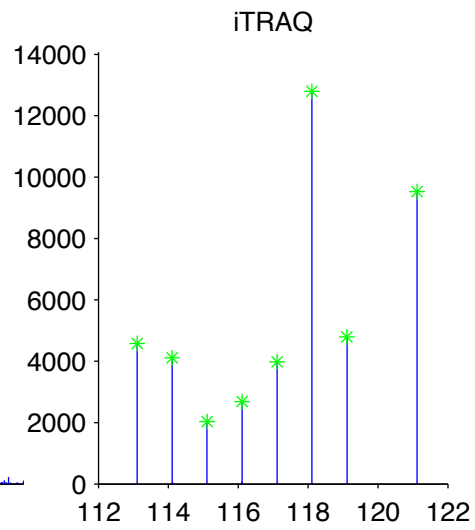

H [ E ] L [ Q ] A [ N ] c [ y ] [ E ] [ E ] V [ K ] [ D ] R

cofilin 1 (non-muscle) [Homo sapiens]

Charge State: +4

Scan Number: 4459

File Name: HJ050711\_GBMxeno\_bio1\_E\_HANNAH.raw

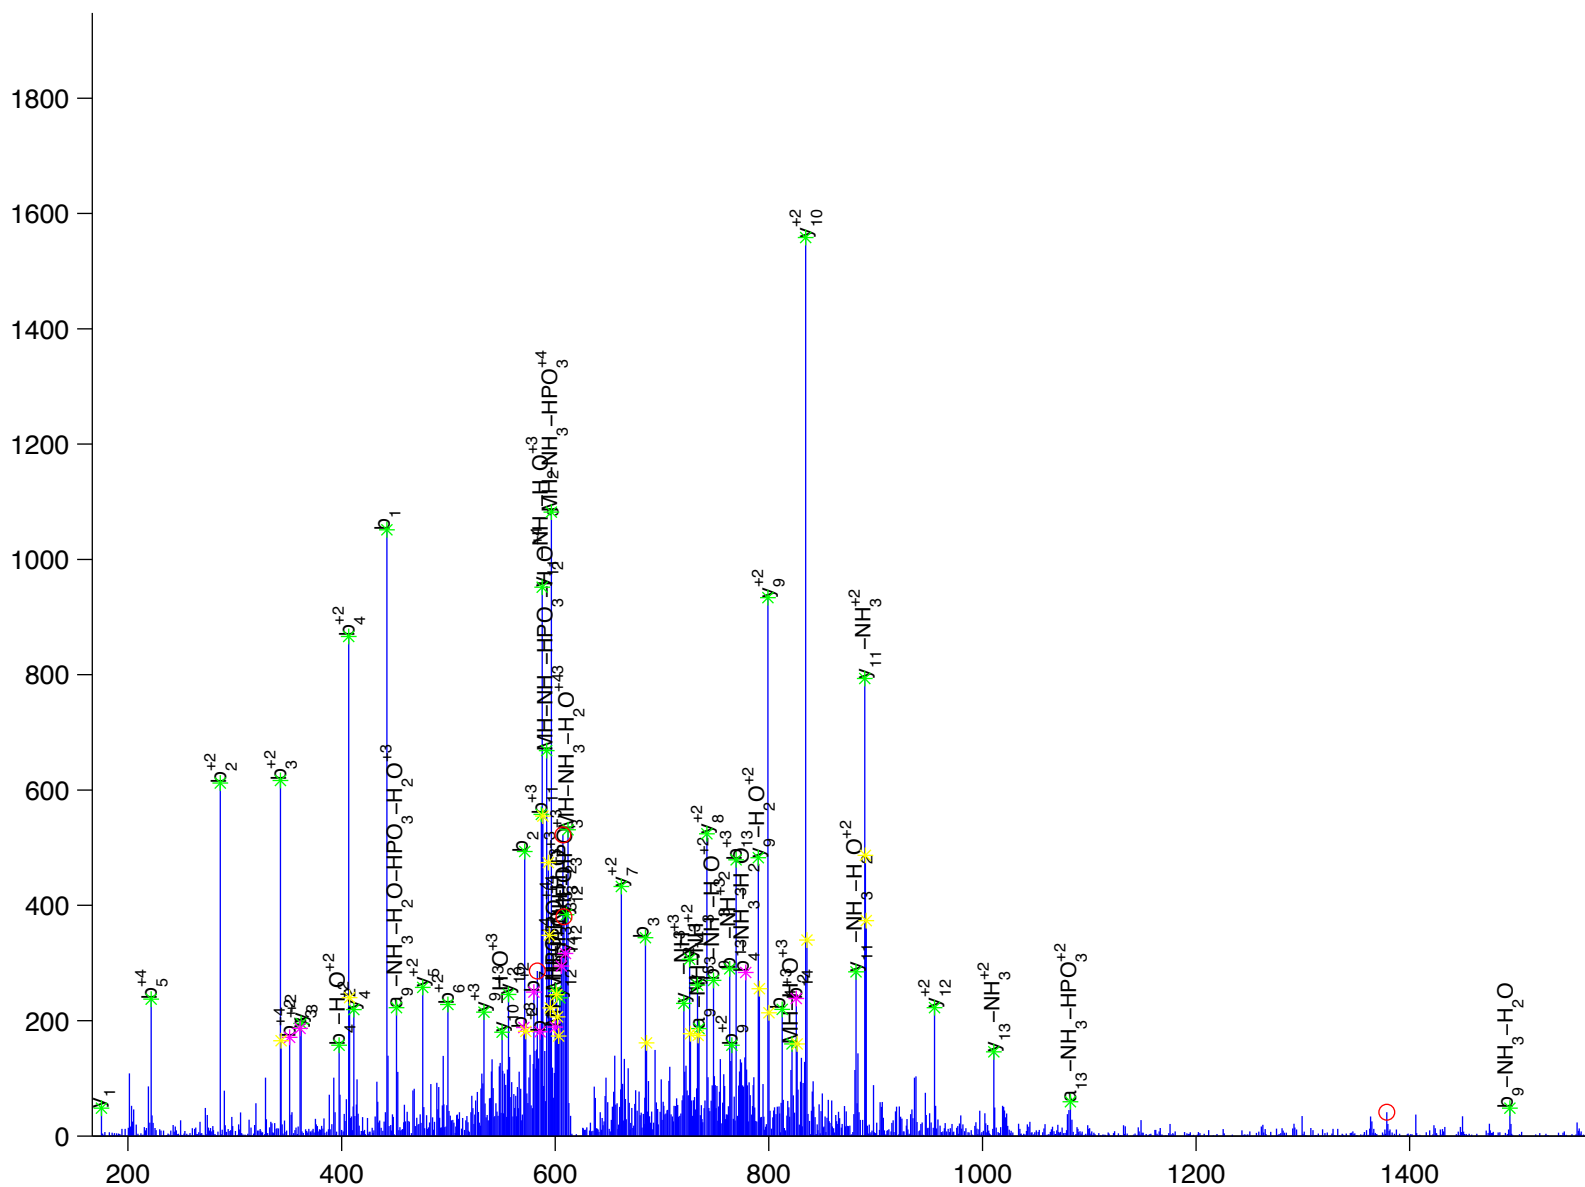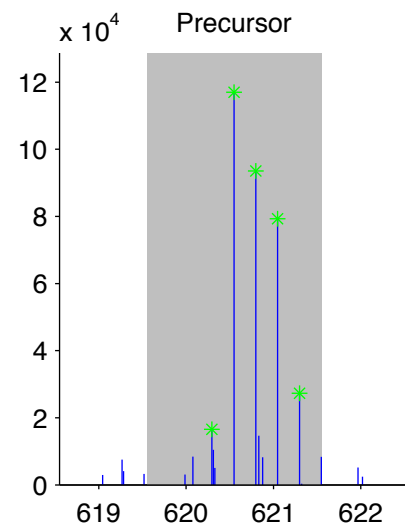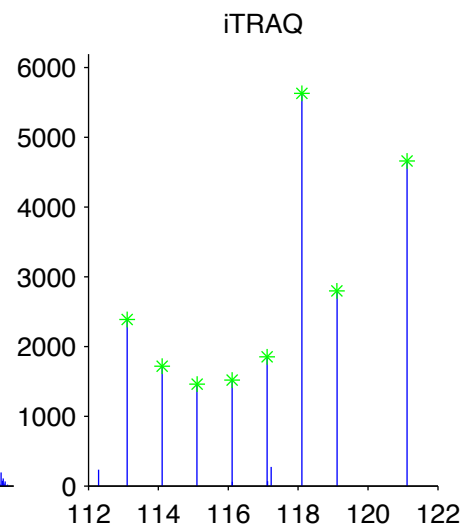

Q[A]S[E]Q[N]W[A]N[y]S[A]E[Q]N[R]

connexin 43 [Homo sapiens]

Charge State: +3

Scan Number: 4835

File Name: HJ050711\_GBMxeno\_bio1\_E\_HANNAH.raw

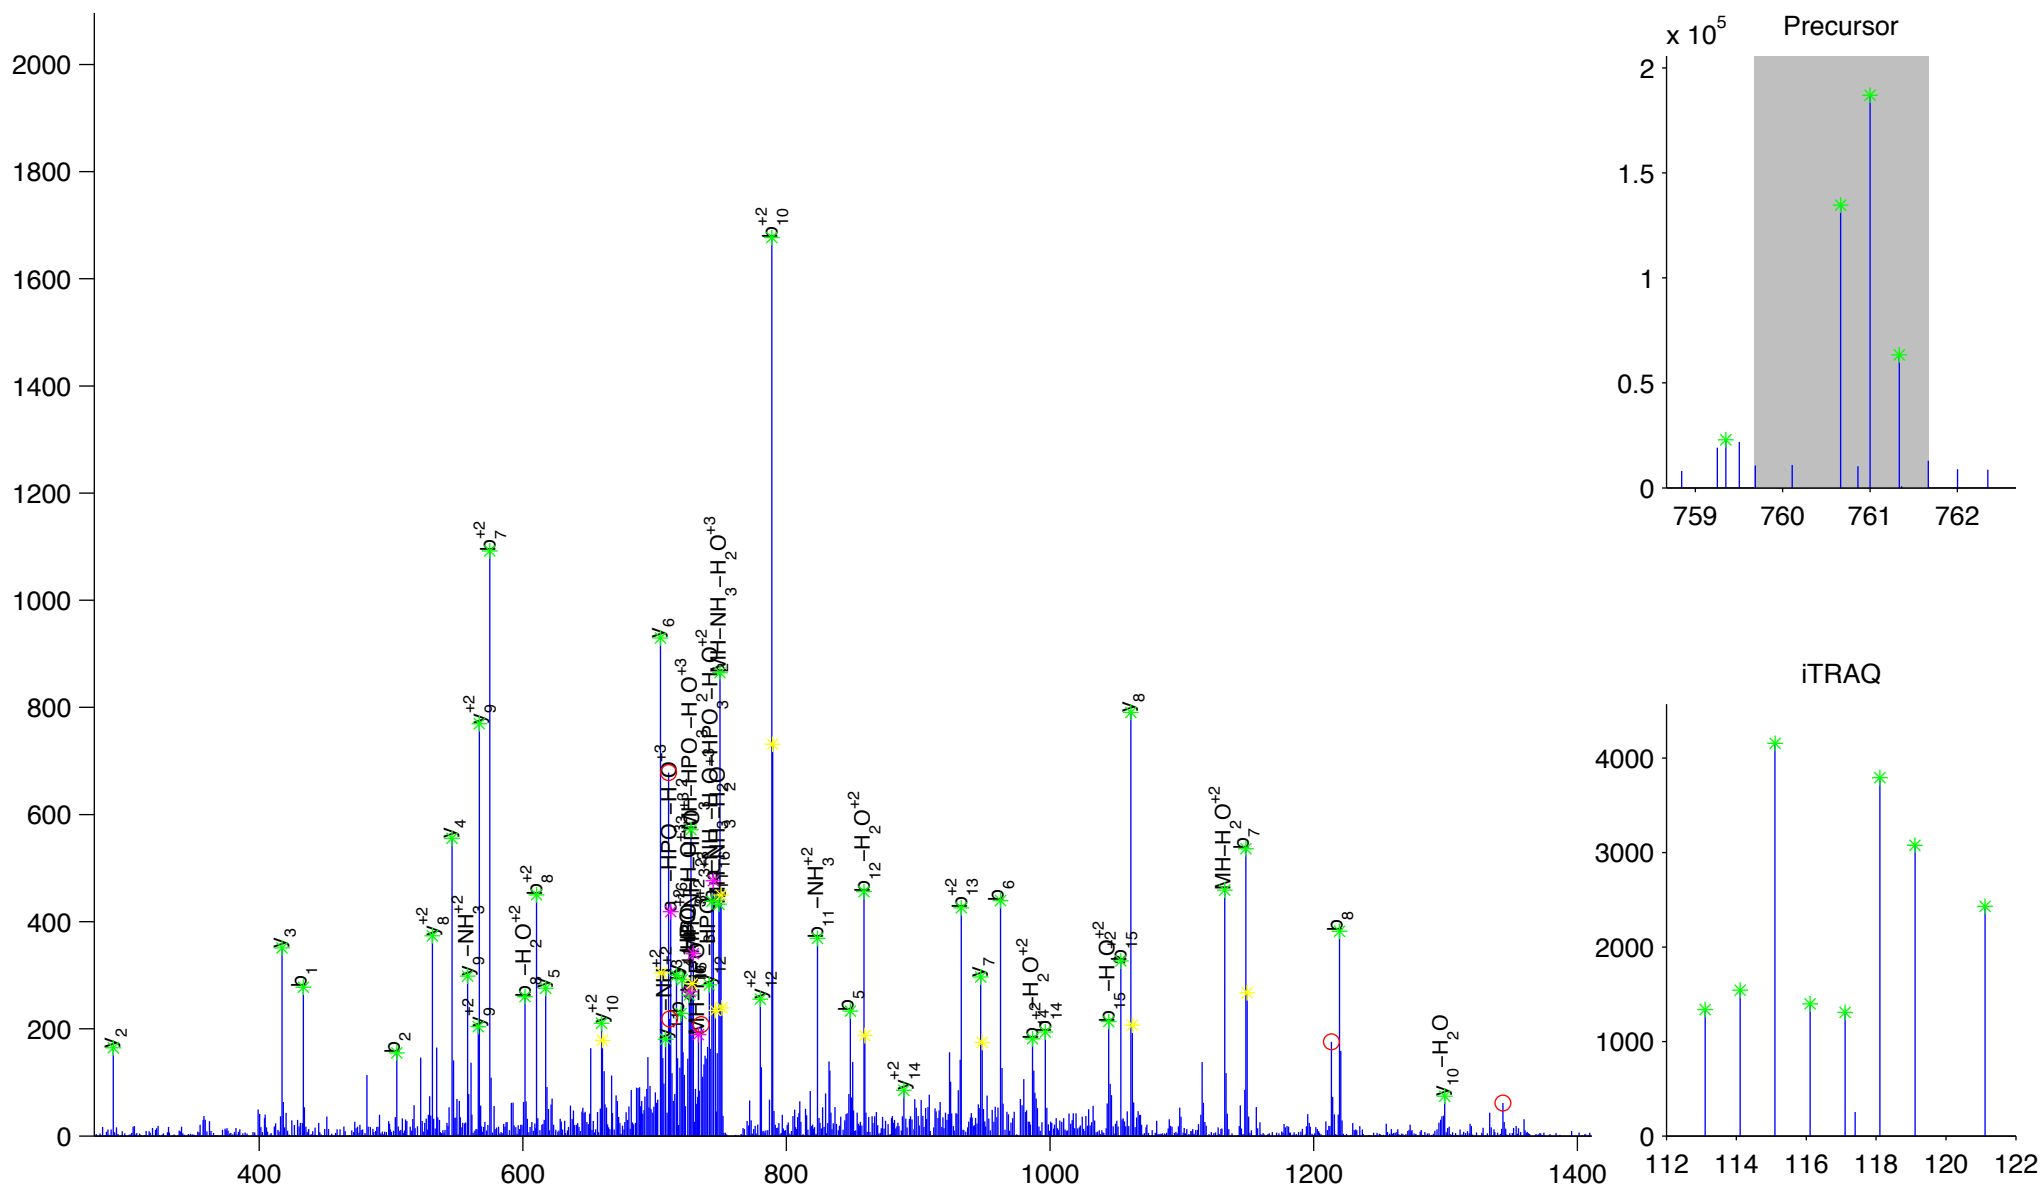

I [G] E [G] T [y] G [T] V [F] K

cyclin-dependent kinase 5 [Homo sapiens]

Charge State: +3

Scan Number: 6859

File Name: HJ050711\_GBMxeno\_bio1\_E\_HANNAH.raw

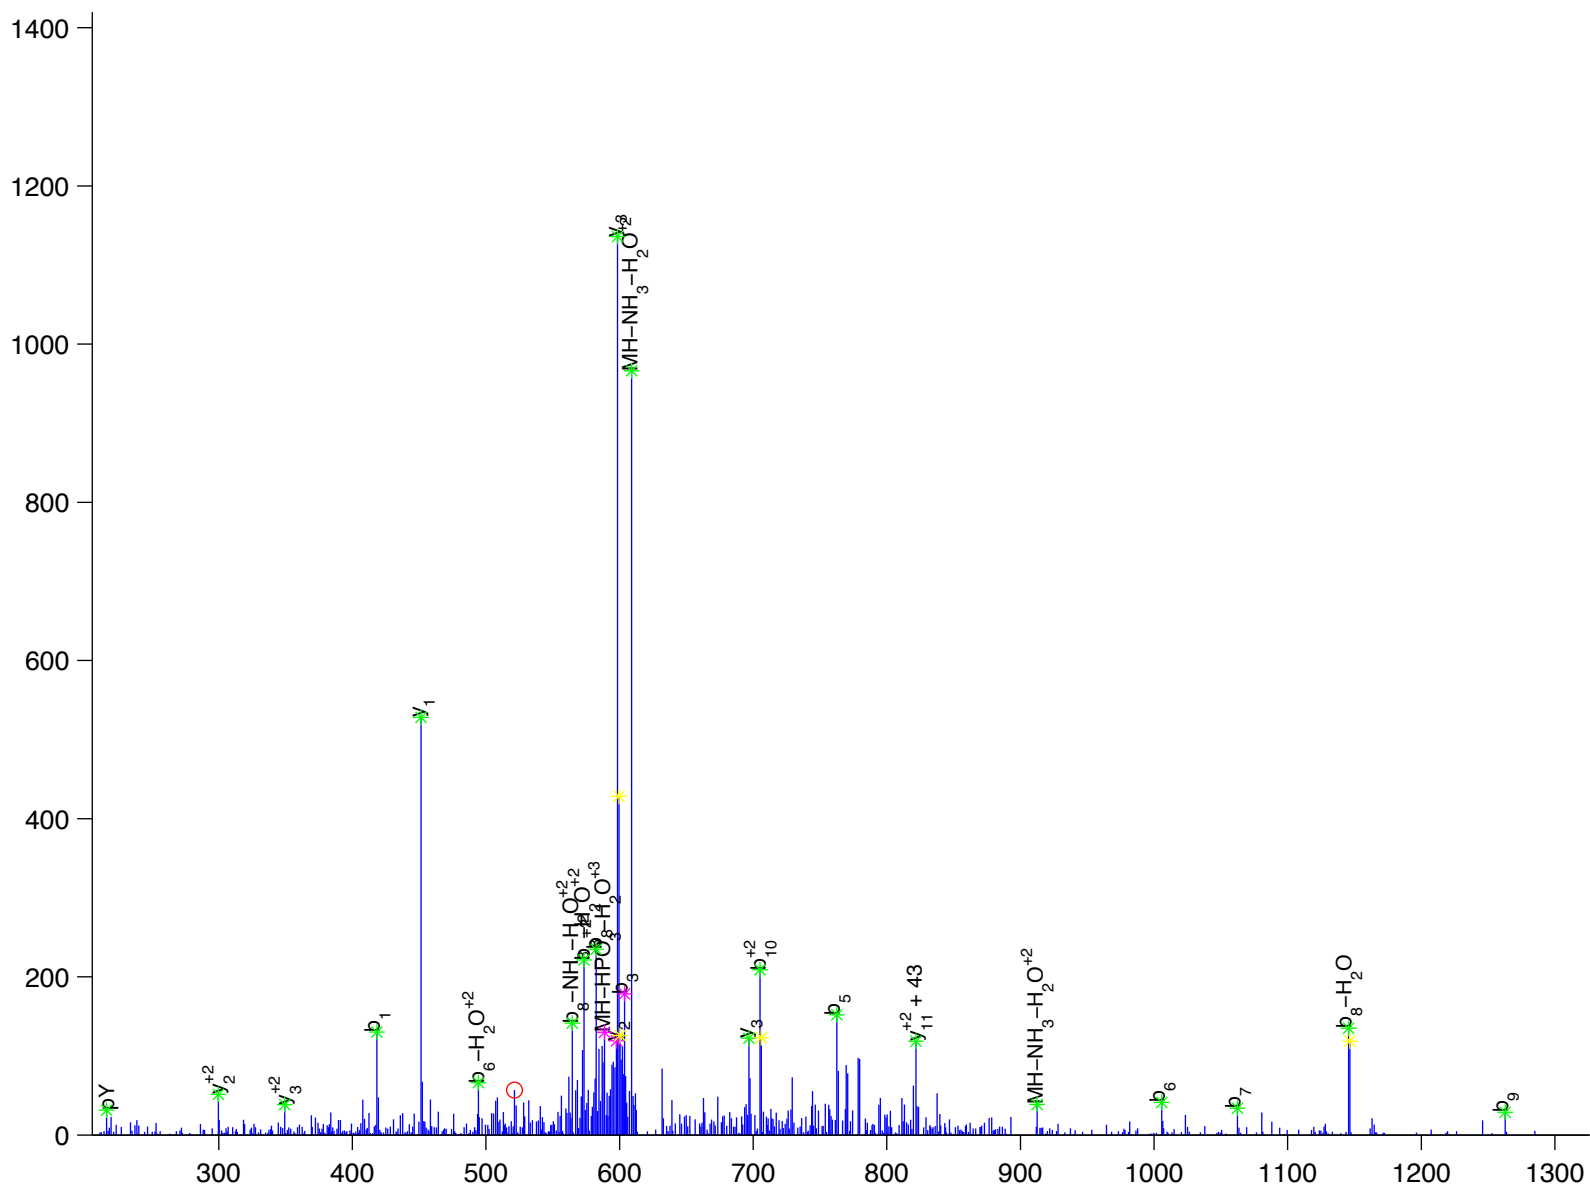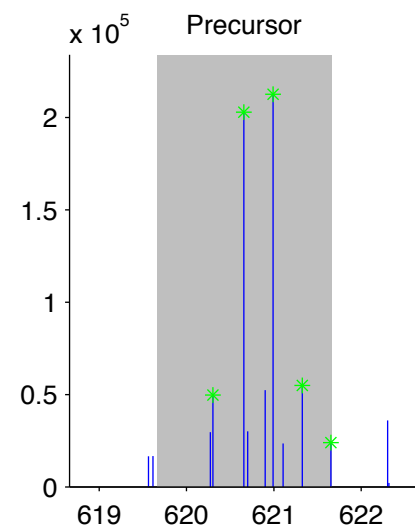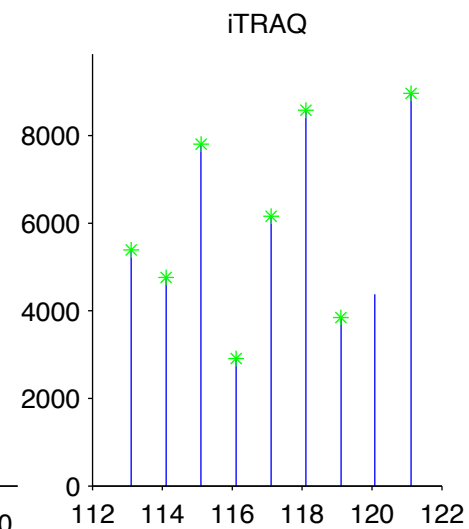



G[V]N[I]G[G]A[G]S[Y]I[y]E[K]P[L]A[E]G[P]Q[V]T[G]P[I]E[V]P[A]A[R]

cysteine-rich protein 2 [Homo sapiens]

Charge State: +4

Scan Number: 7899

File Name: HJ050711\_GBMxeno\_bio1\_E\_HANNAH.raw

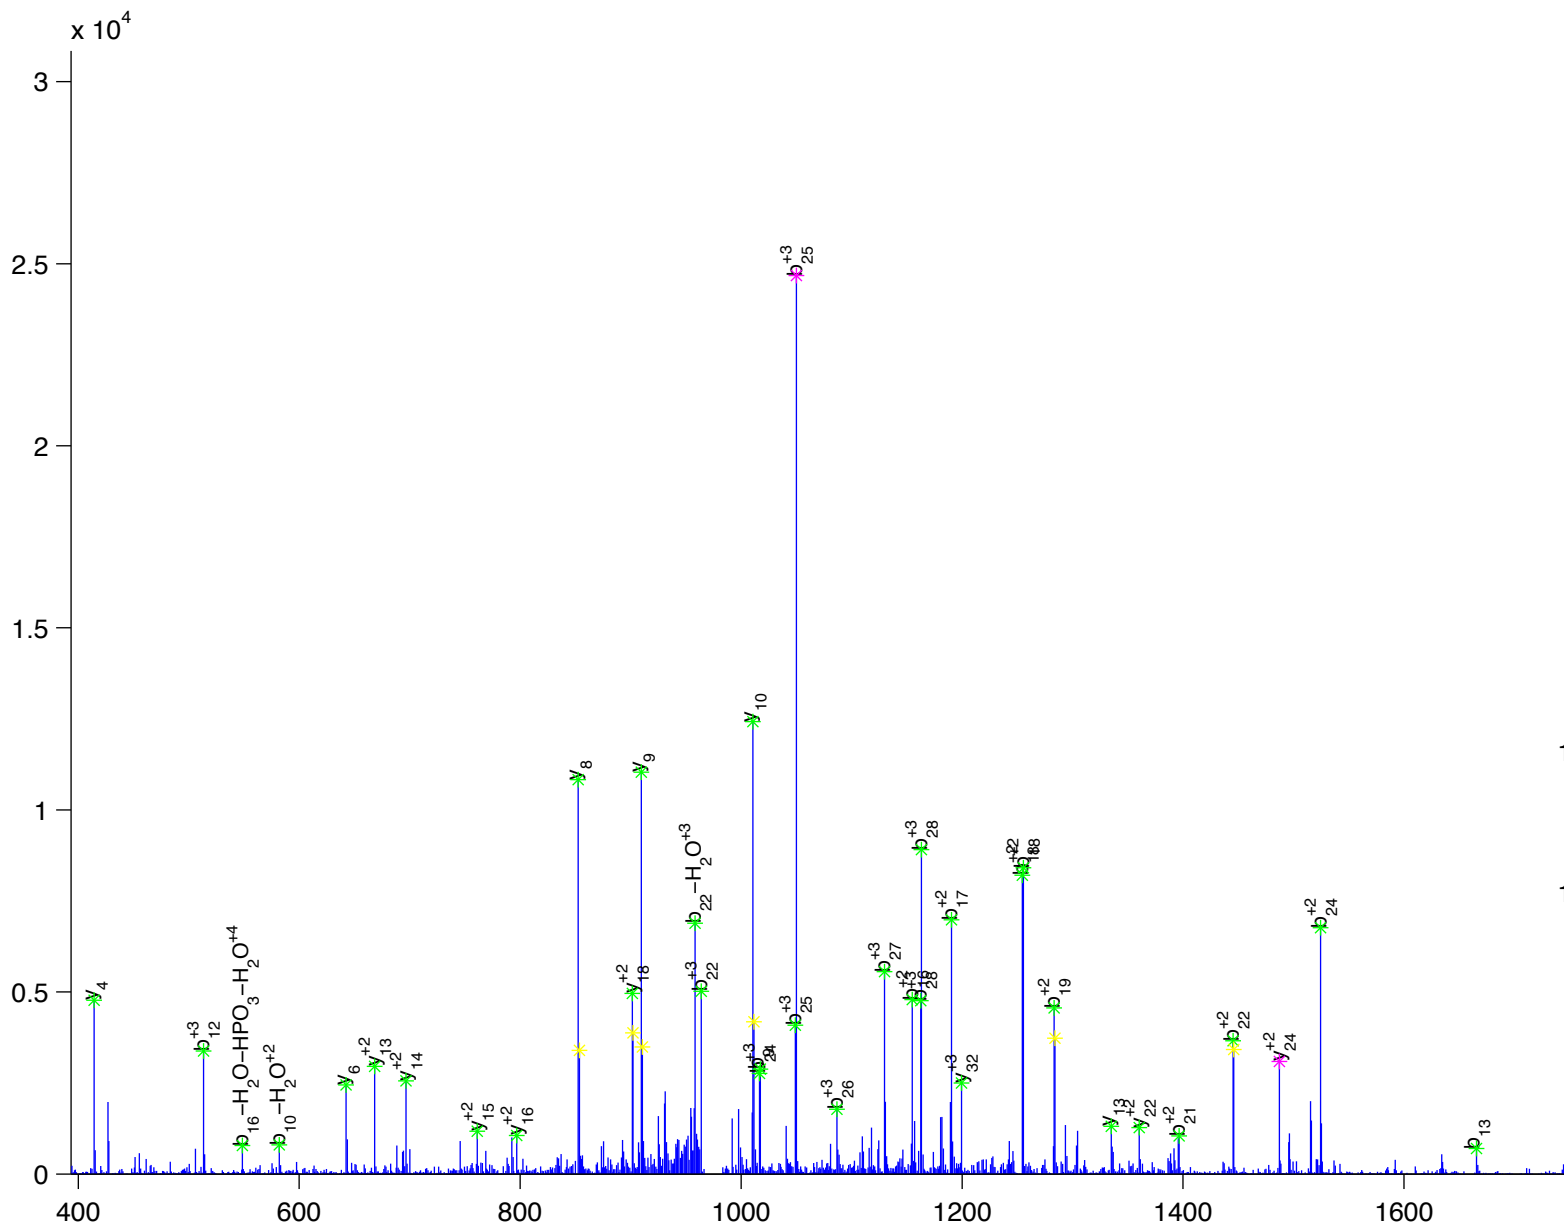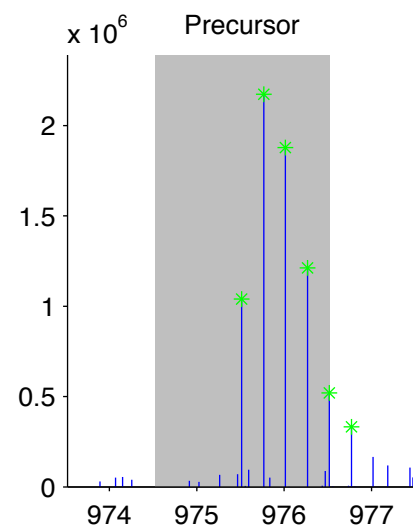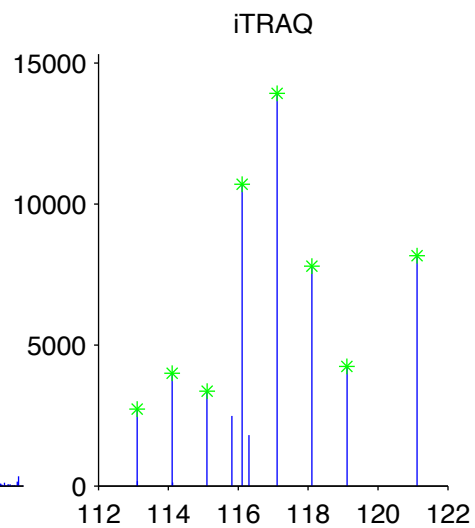

L [G] E y E D V S R

cytoskeleton associated protein 1 [Homo sapiens]

Charge State: +2

Scan Number: 5024

File Name: HJ050711\_GBMxeno\_bio1\_E\_HANNAH.raw

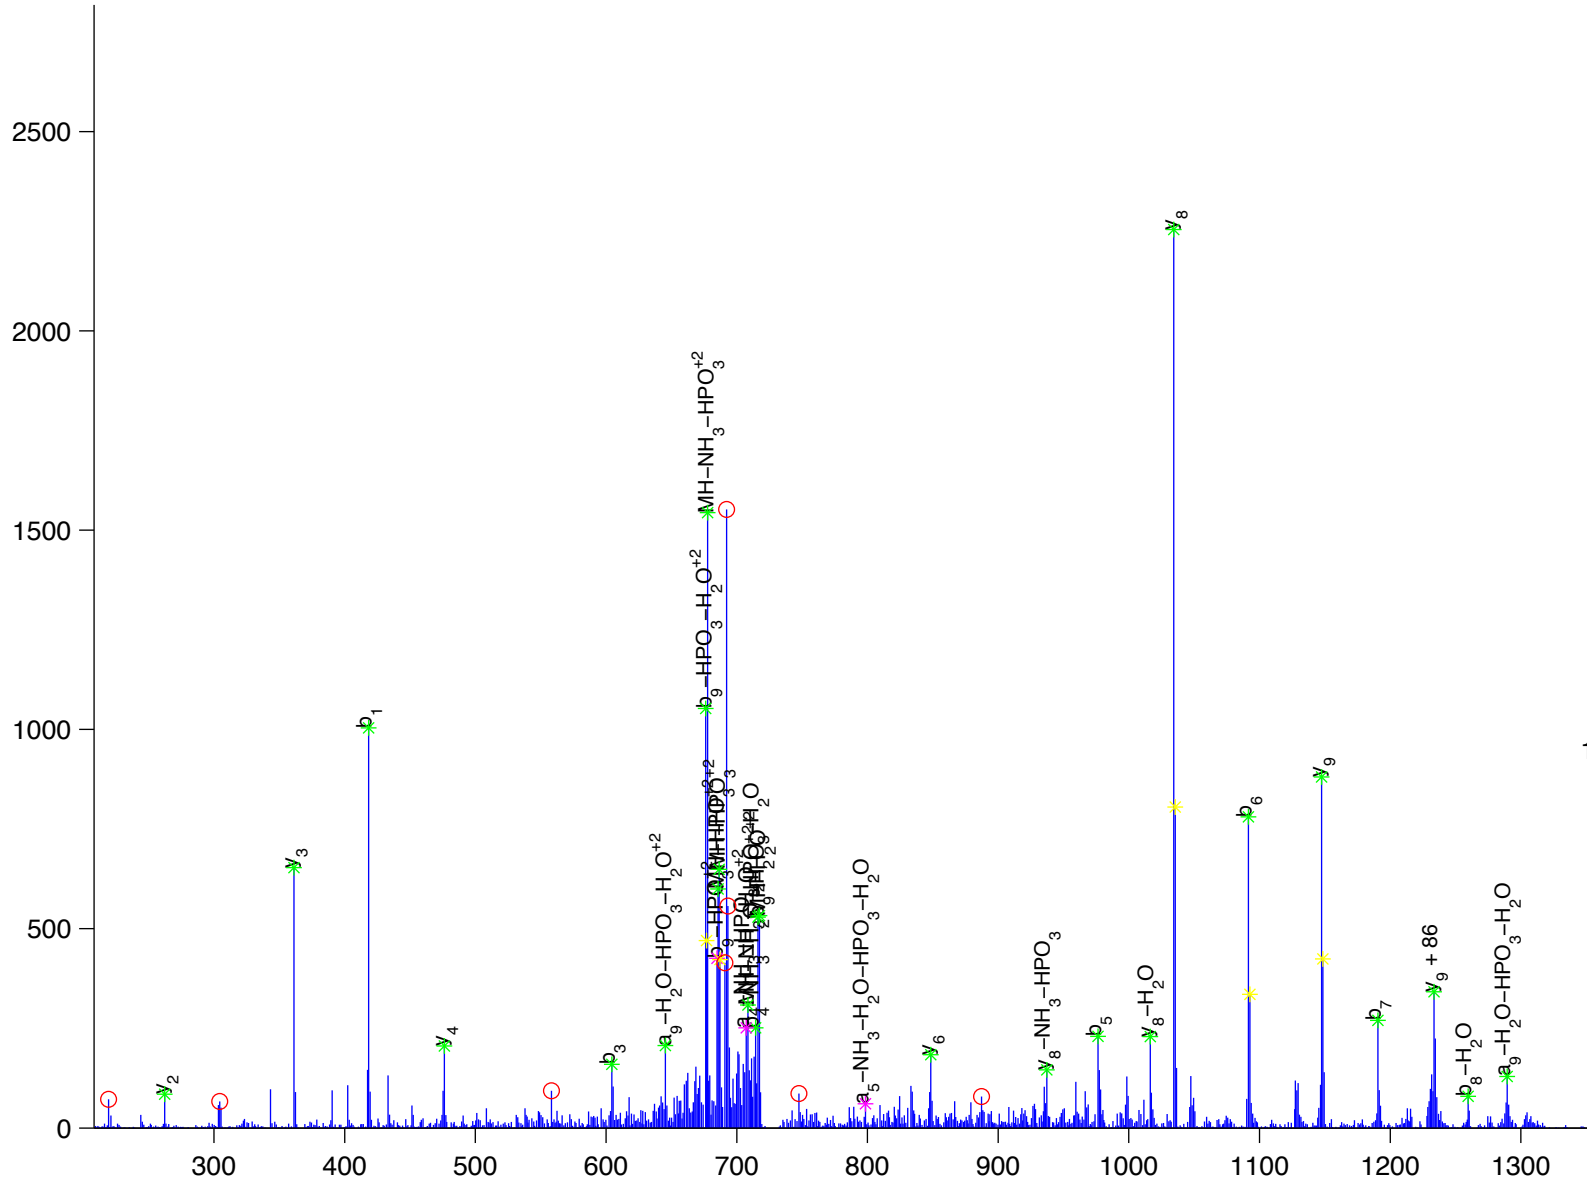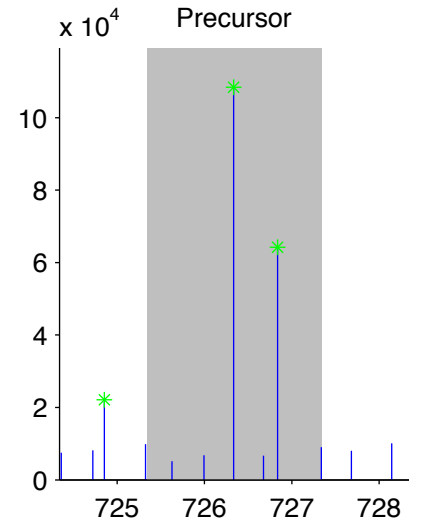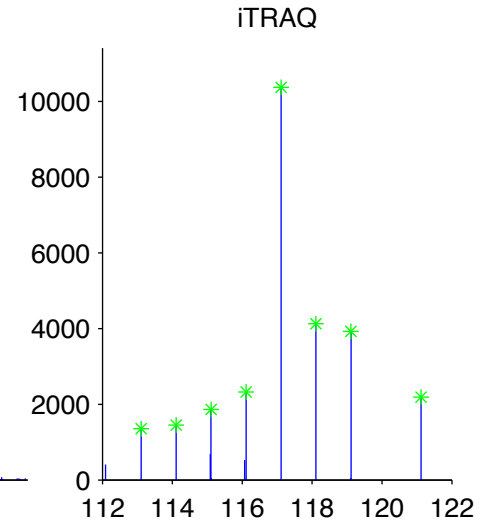

Y [G] [A] [F] [V] [K] [P] [A] [V] [V] [T] [V] [G] [D] [F] [P] [E] [E] [D] y [G] [L] [D] [E] [I]

cytoskeleton associated protein 1 [Homo sapiens]

Charge State: +3

Scan Number: 9957

File Name: HJ050711\_GBMxeno\_bio1\_E\_HANNAH.raw

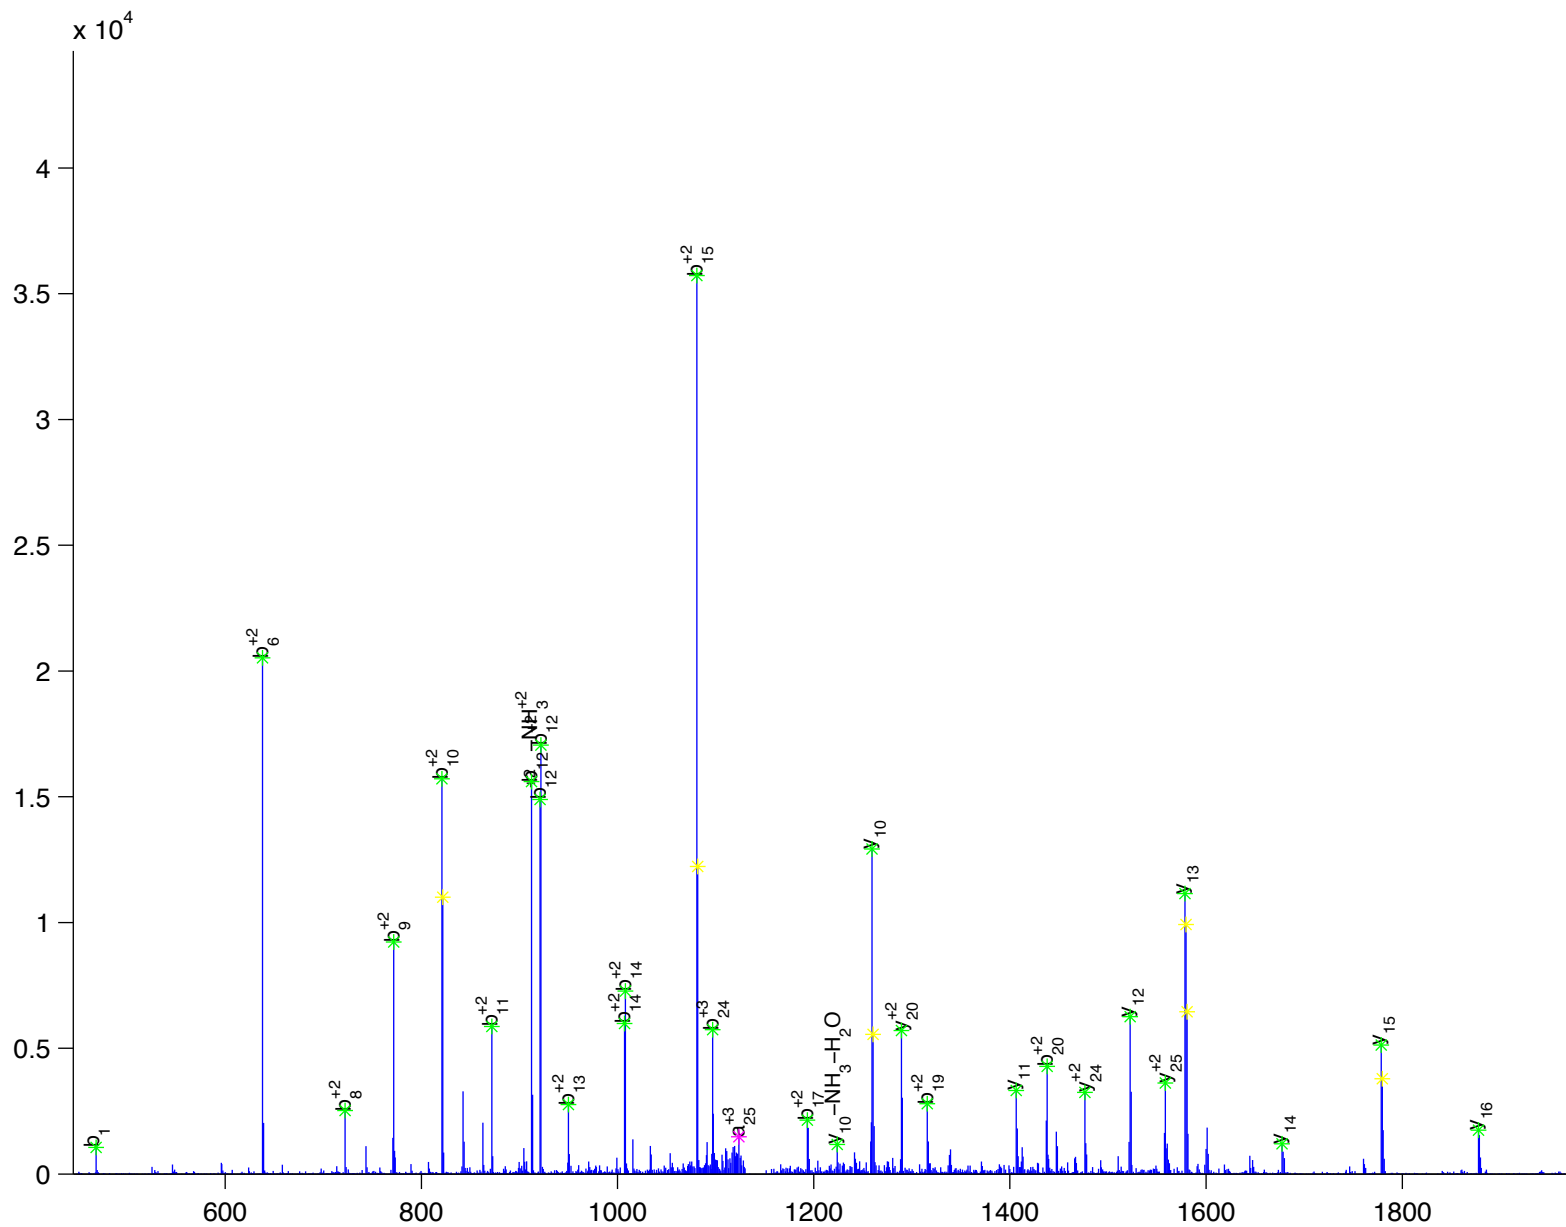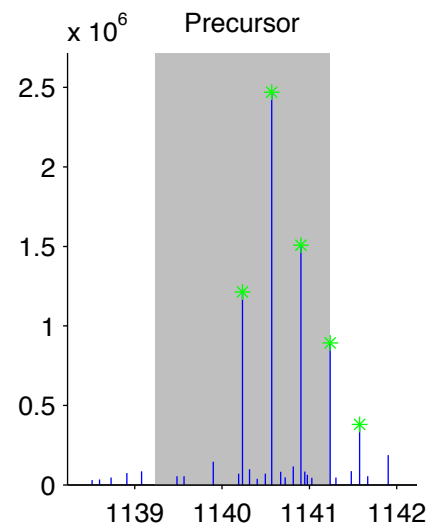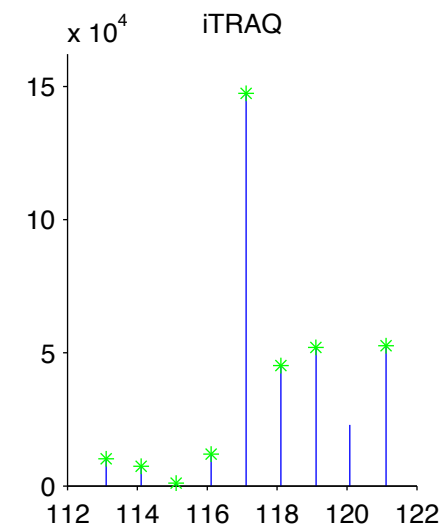

I [ y ] E [ P ] L [ D ] V [ K ]

cytosolic phospholipase A2, group IVA [Homo sapiens]

Charge State: +3

Scan Number: 6964

File Name: HJ050711\_GBMxeno\_bio1\_E\_HANNAH.raw

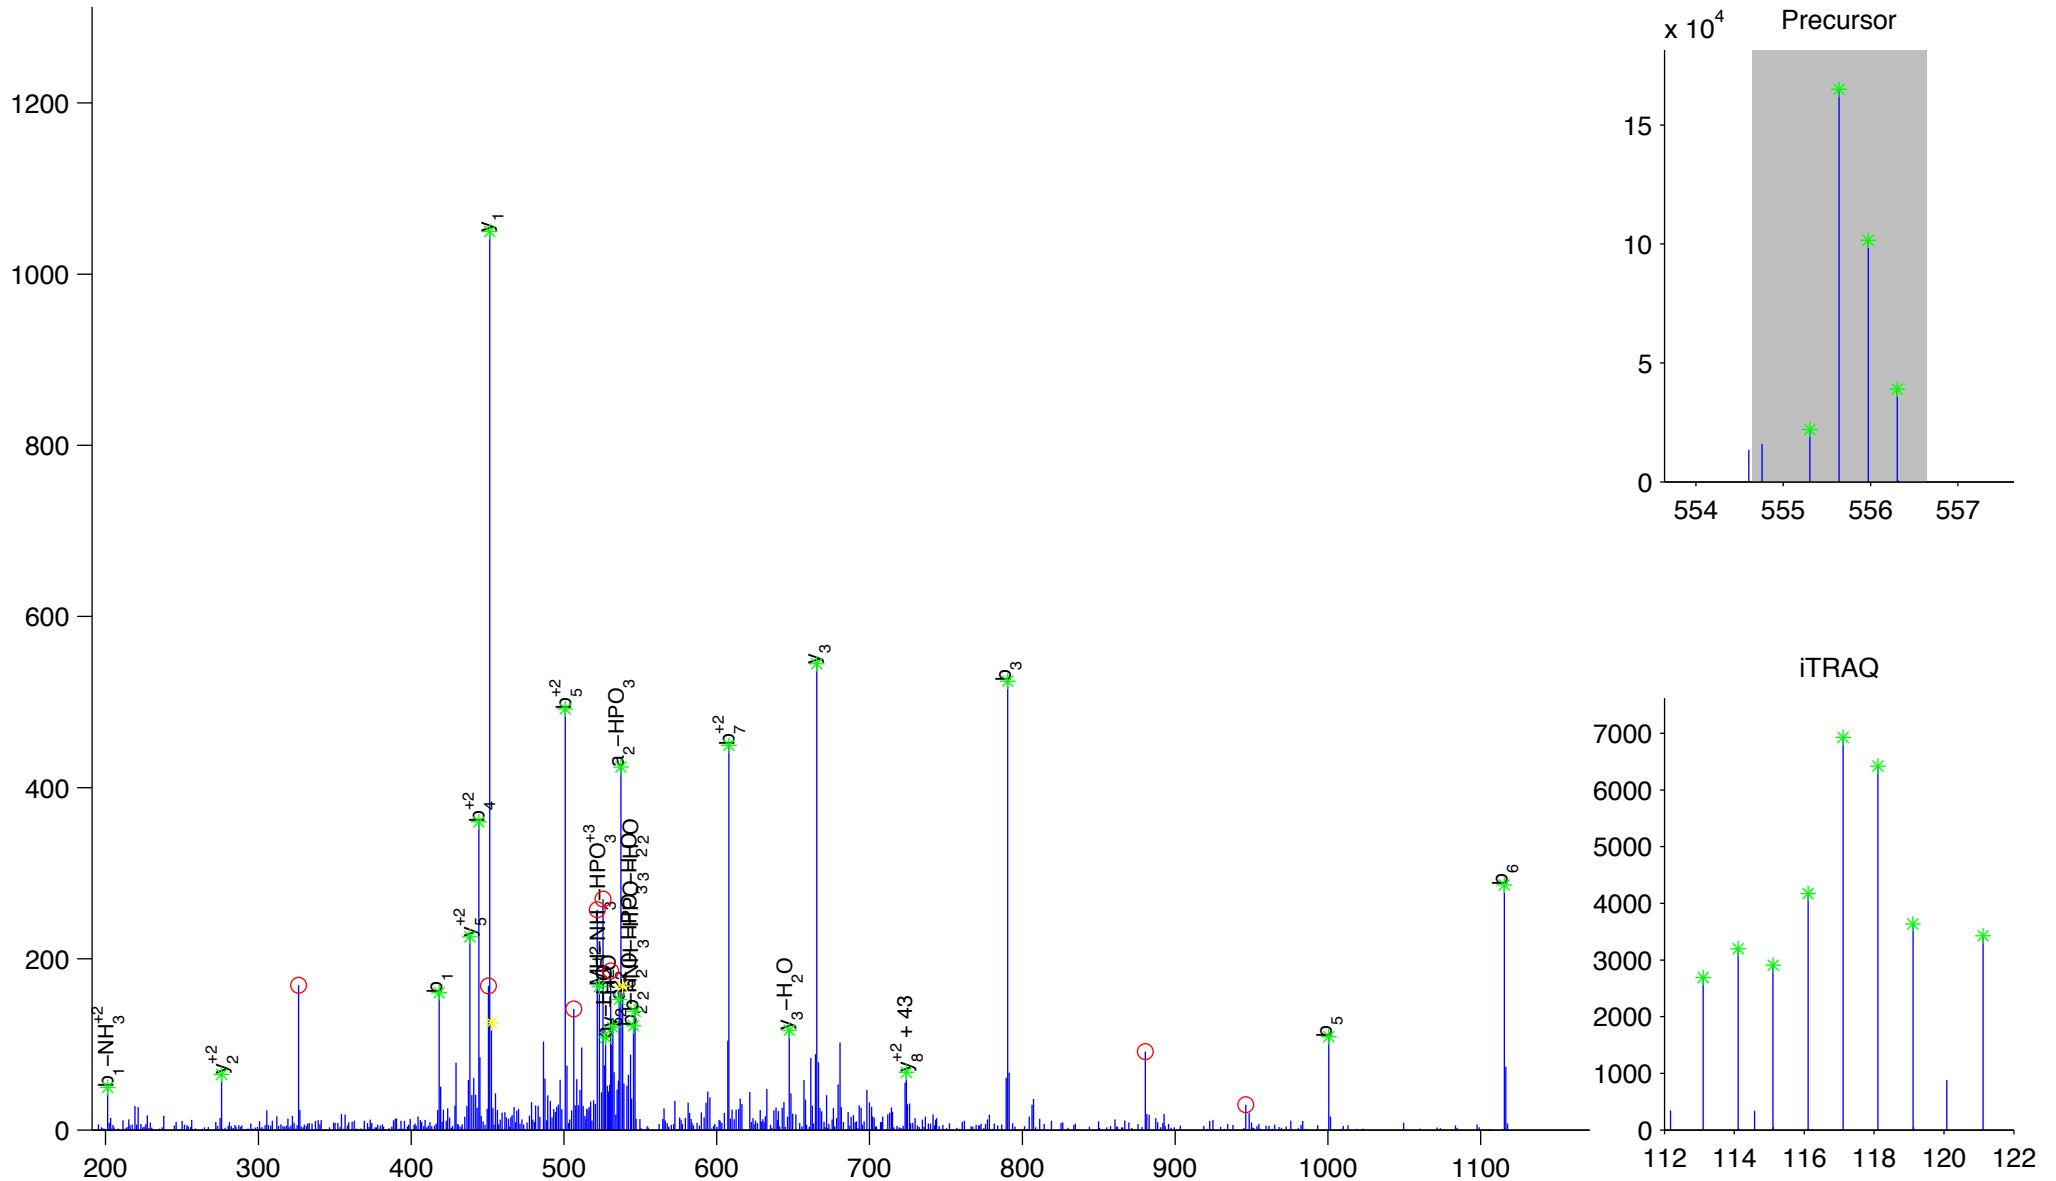

T [ D ] S [ c ] S [ S ] A [ Q ] A [ Q ] y [ D ] T [ P ] K

discoidin, CUB and LCCL domain containing 2 [Homo sapiens]

Charge State: +3

Scan Number: 3239

File Name: HJ050711\_GBMxeno\_bio1\_E\_HANNAH.raw

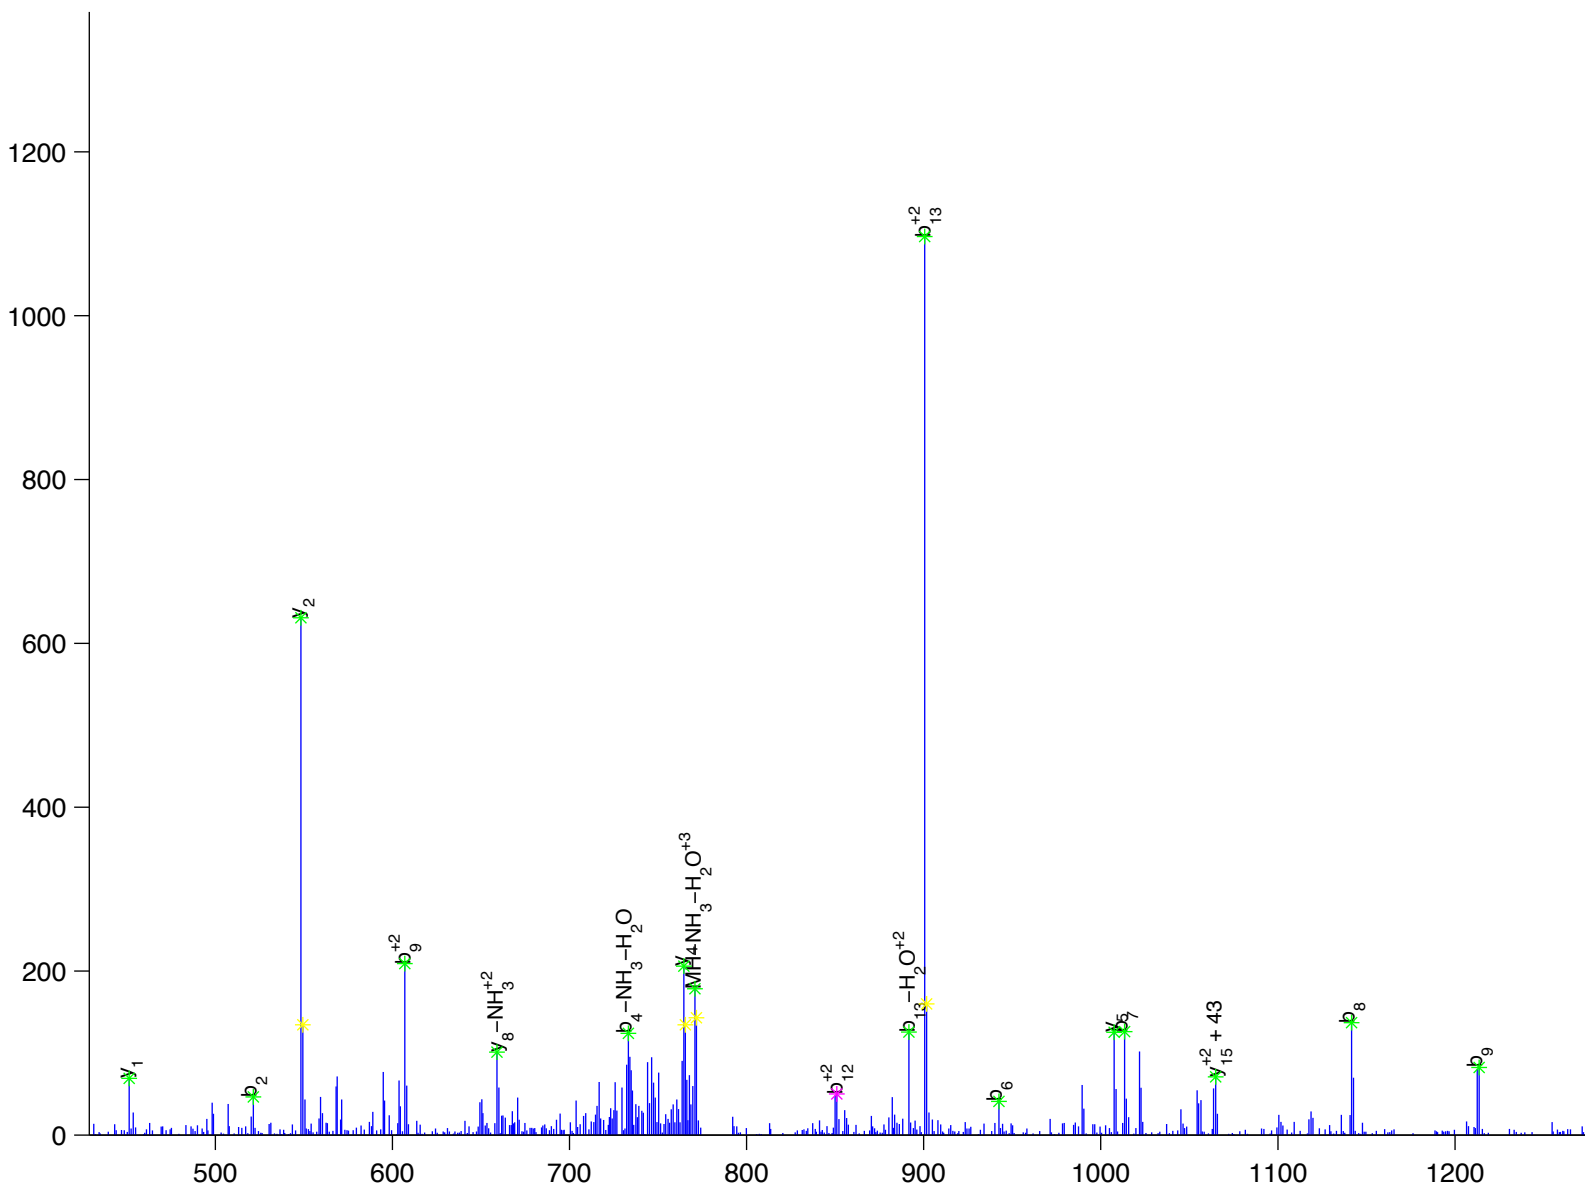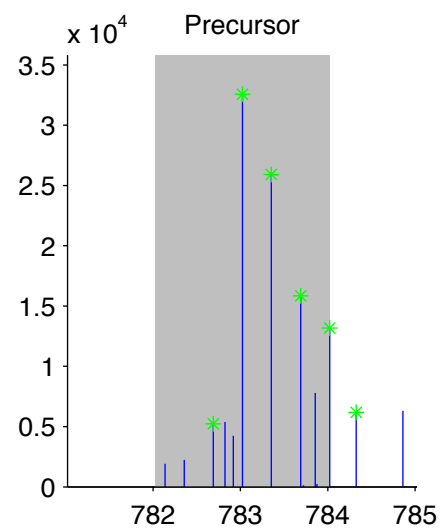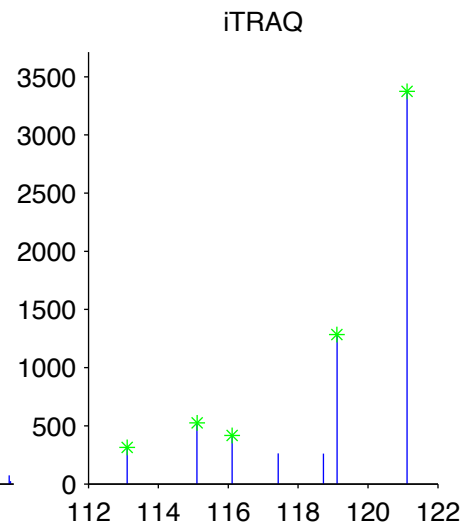

A [G] [K] [P] [G] [L] [P] [A] [P] [D] [E] [L] [V] [y] [Q] [V] [P] [Q] [S] [T] [Q] [E] [V] [S] [G] [A] [G] [R]

discoidin, CUB and LCCL domain containing 2 [Homo sapiens]

Charge State: +4

Scan Number: 7449

File Name: HJ050711\_GBMxeno\_bio1\_E\_HANNAH.raw

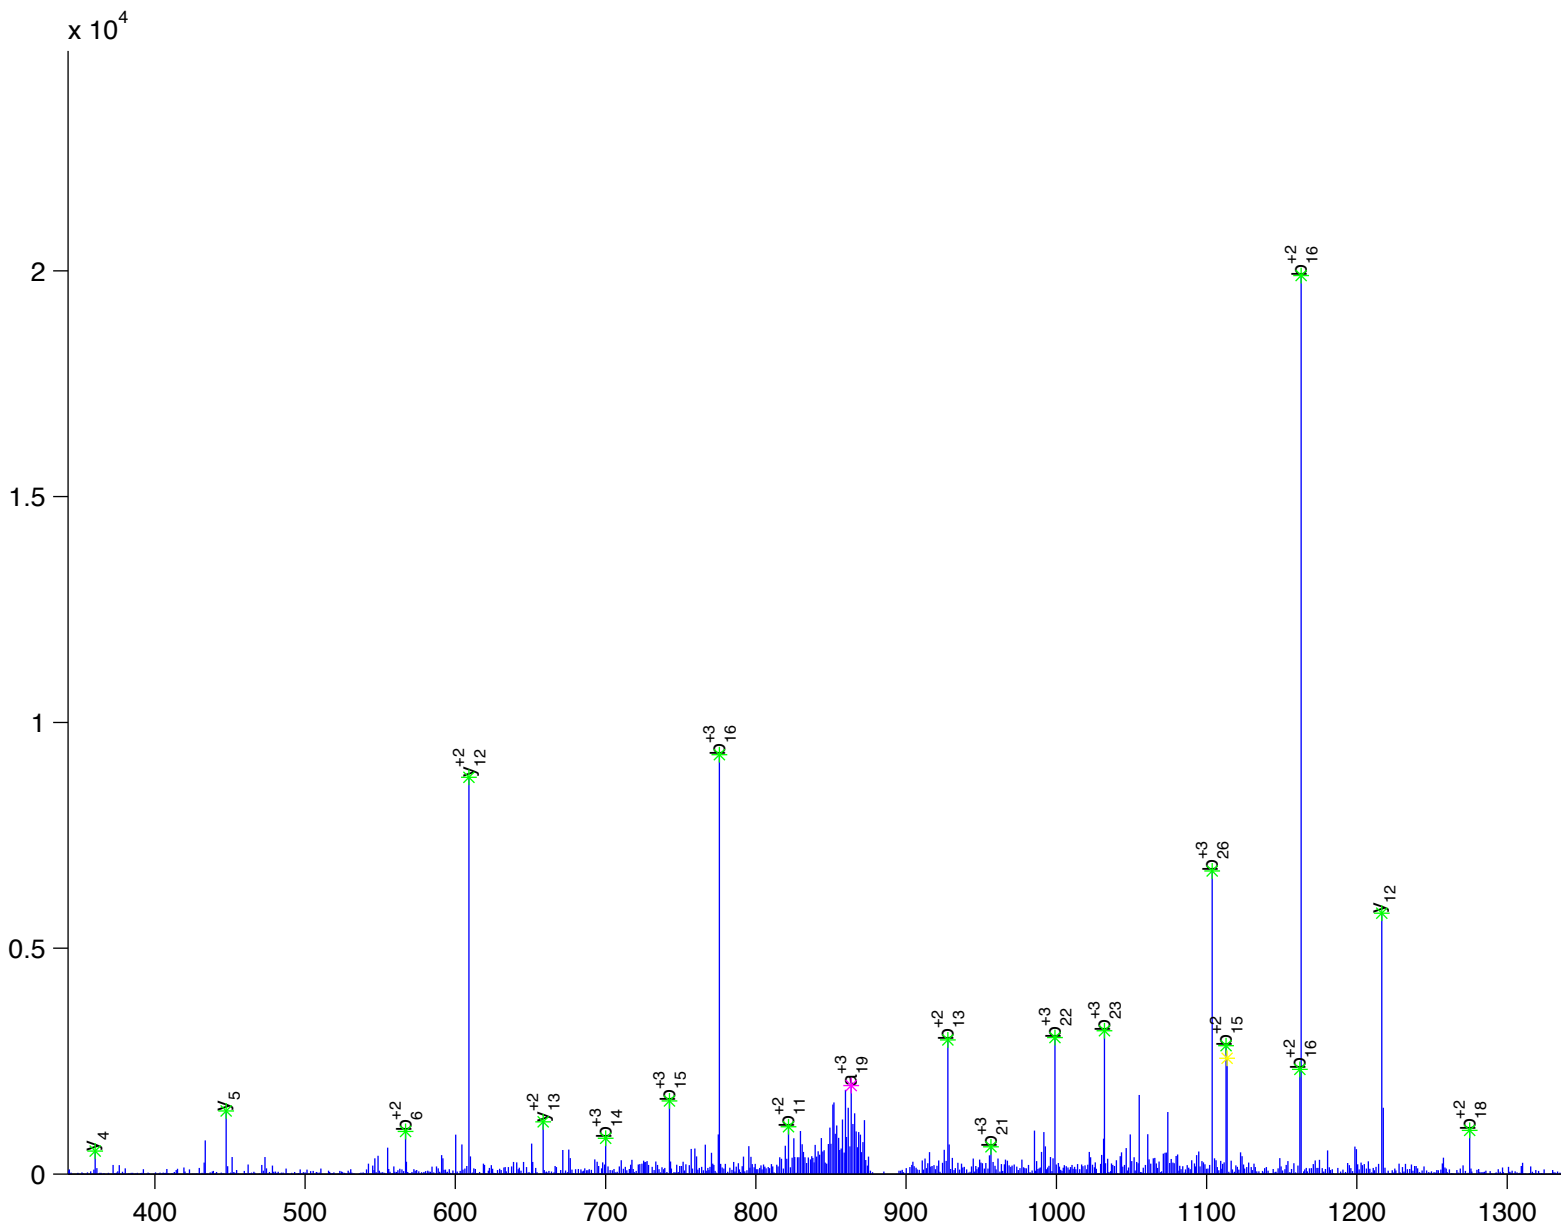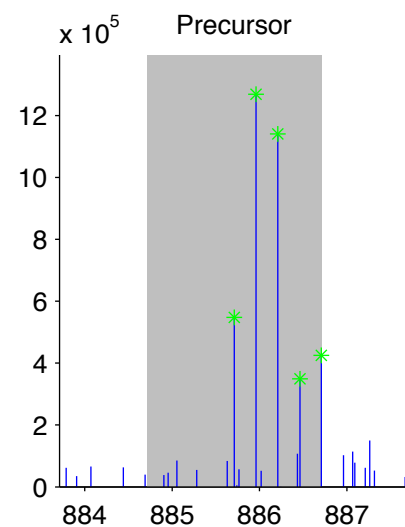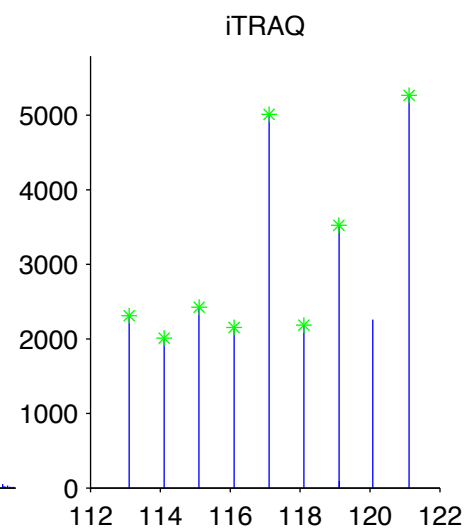

E[V]T[T]V[L]Q[A]D[S]A[E]y[A]Q[P]L[V]G[G]I[V]G[T]L[H]Q[R]

discoidin, CUB and LCCL domain containing 2 [Homo sapiens]

Charge State: +4

Scan Number: 9285

File Name: HJ050711\_GBMxeno\_bio1\_E\_HANNAH.raw

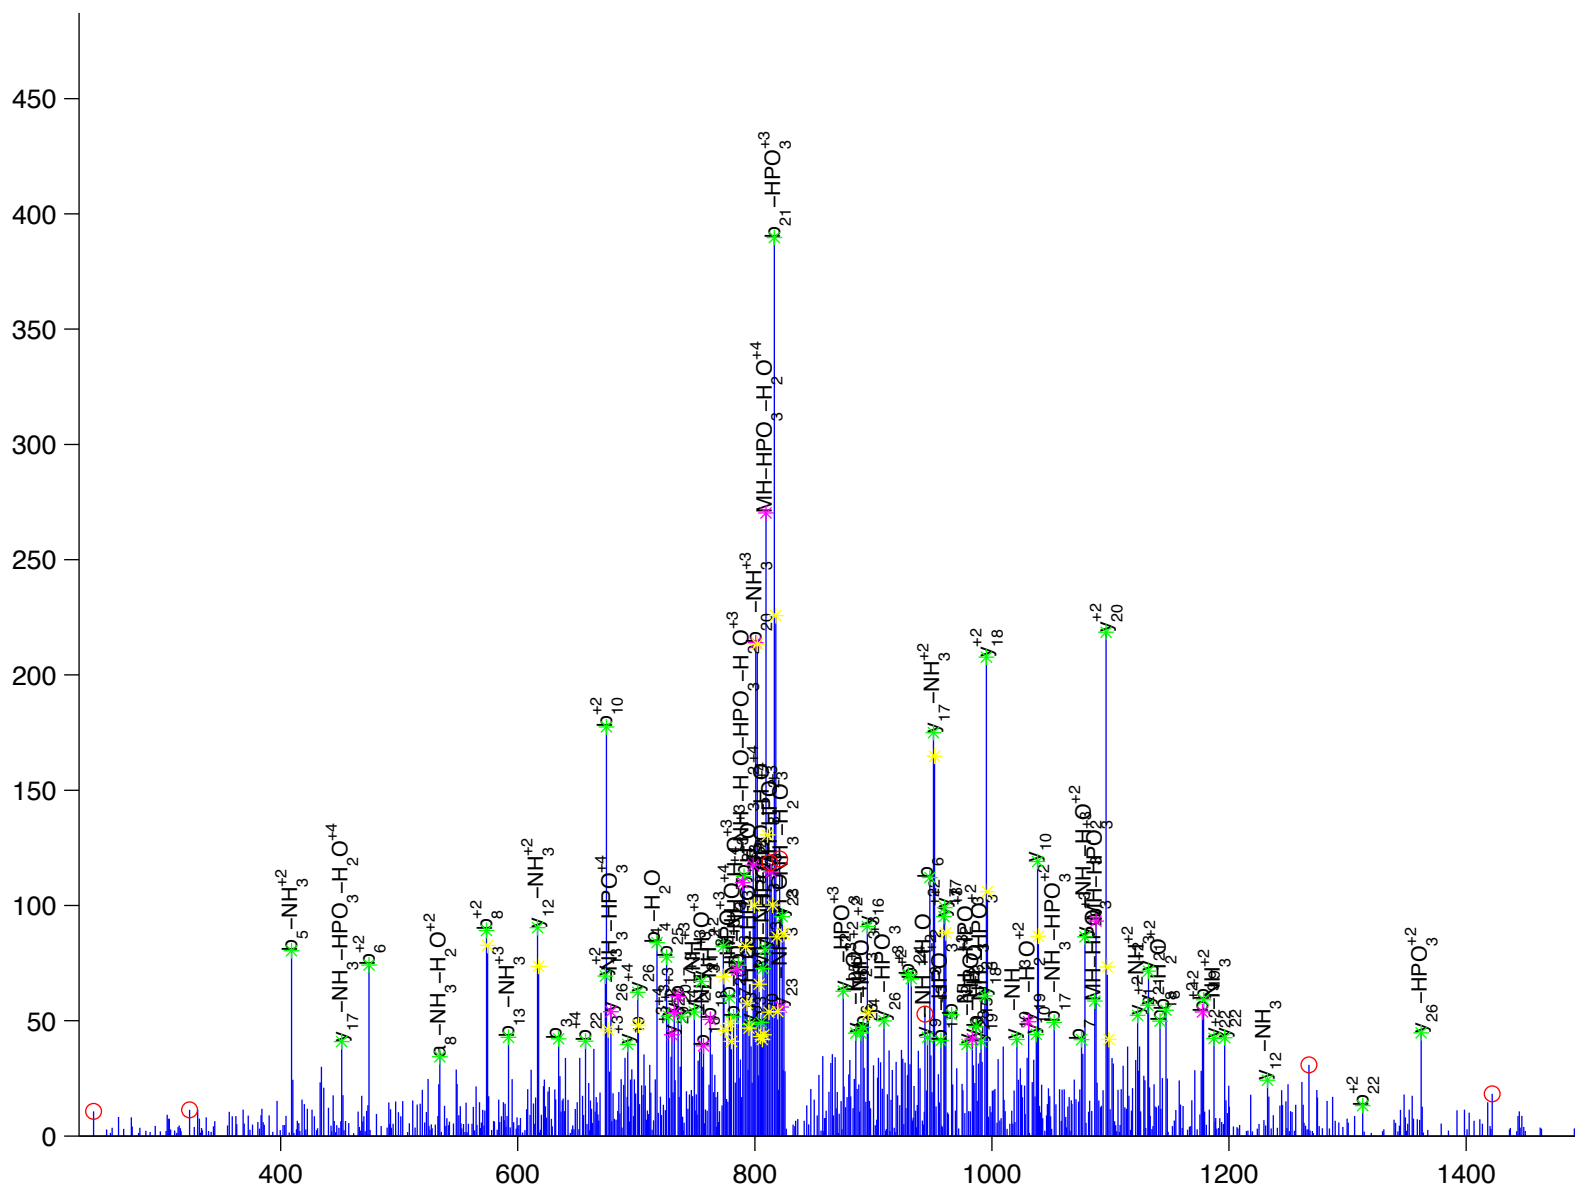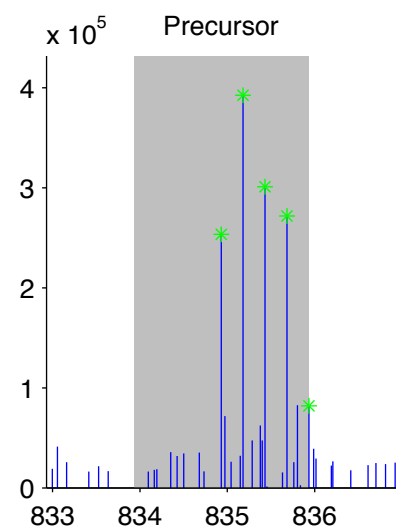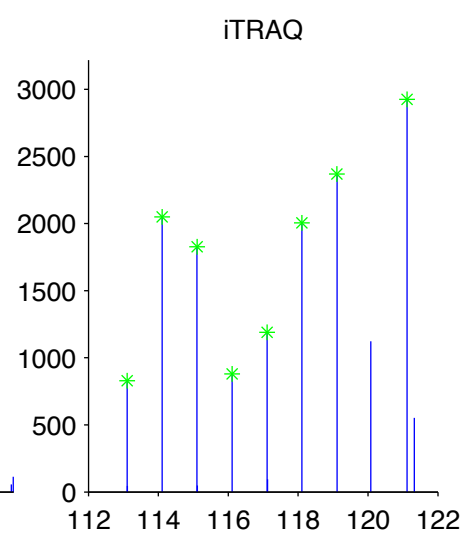

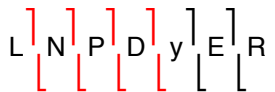

discs large homolog 5 [Homo sapiens]

Charge State: +2

Scan Number: 4152

File Name: HJ050711\_GBMxeno\_bio1\_E\_HANNAH.raw

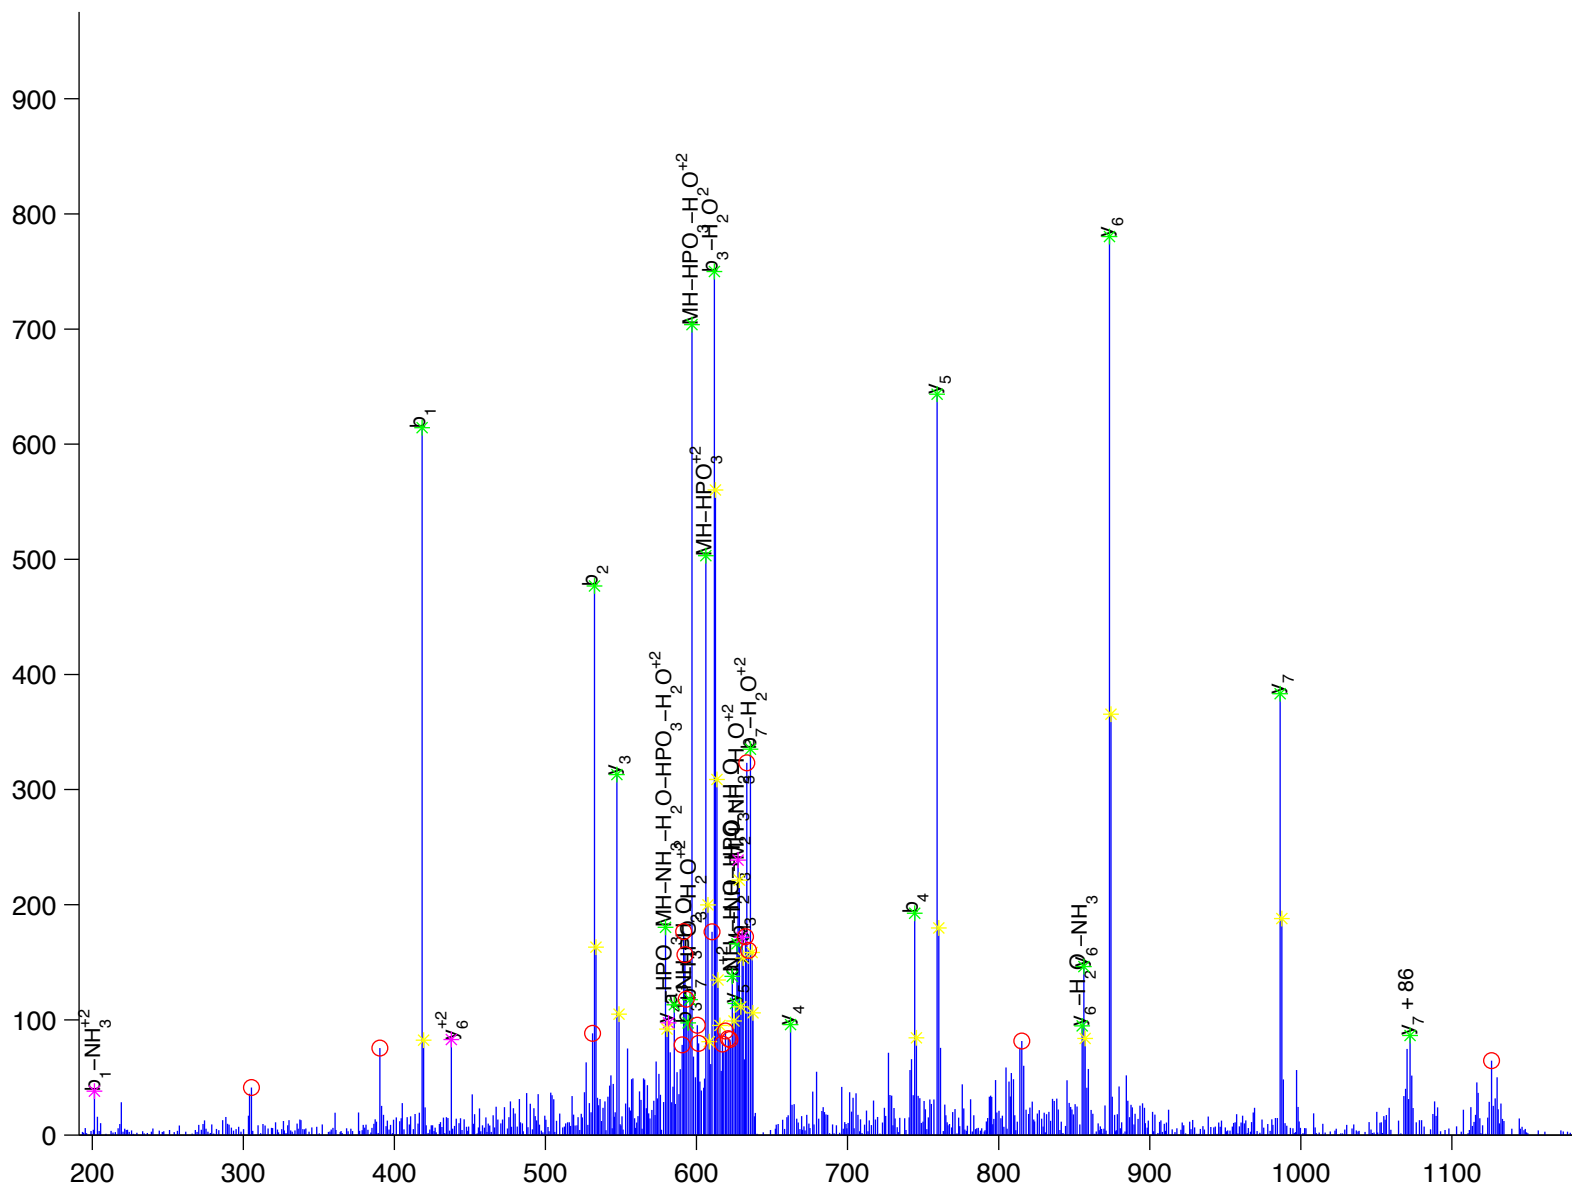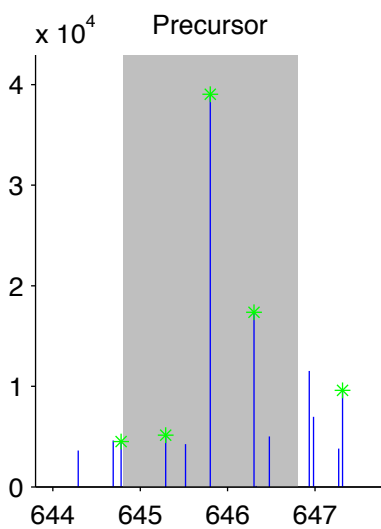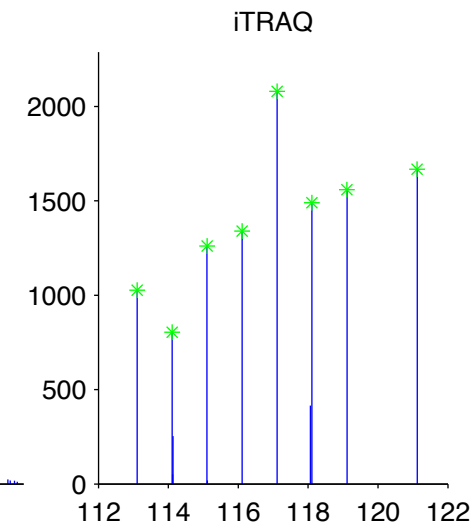



D  
[ A ]  
[ V ] y [ S ] E [ Y ] K

discs large homolog 5 [Homo sapiens]

Charge State: +3

Scan Number: 4623

File Name: HJ050711\_GBMxeno\_bio1\_E\_HANNAH.raw

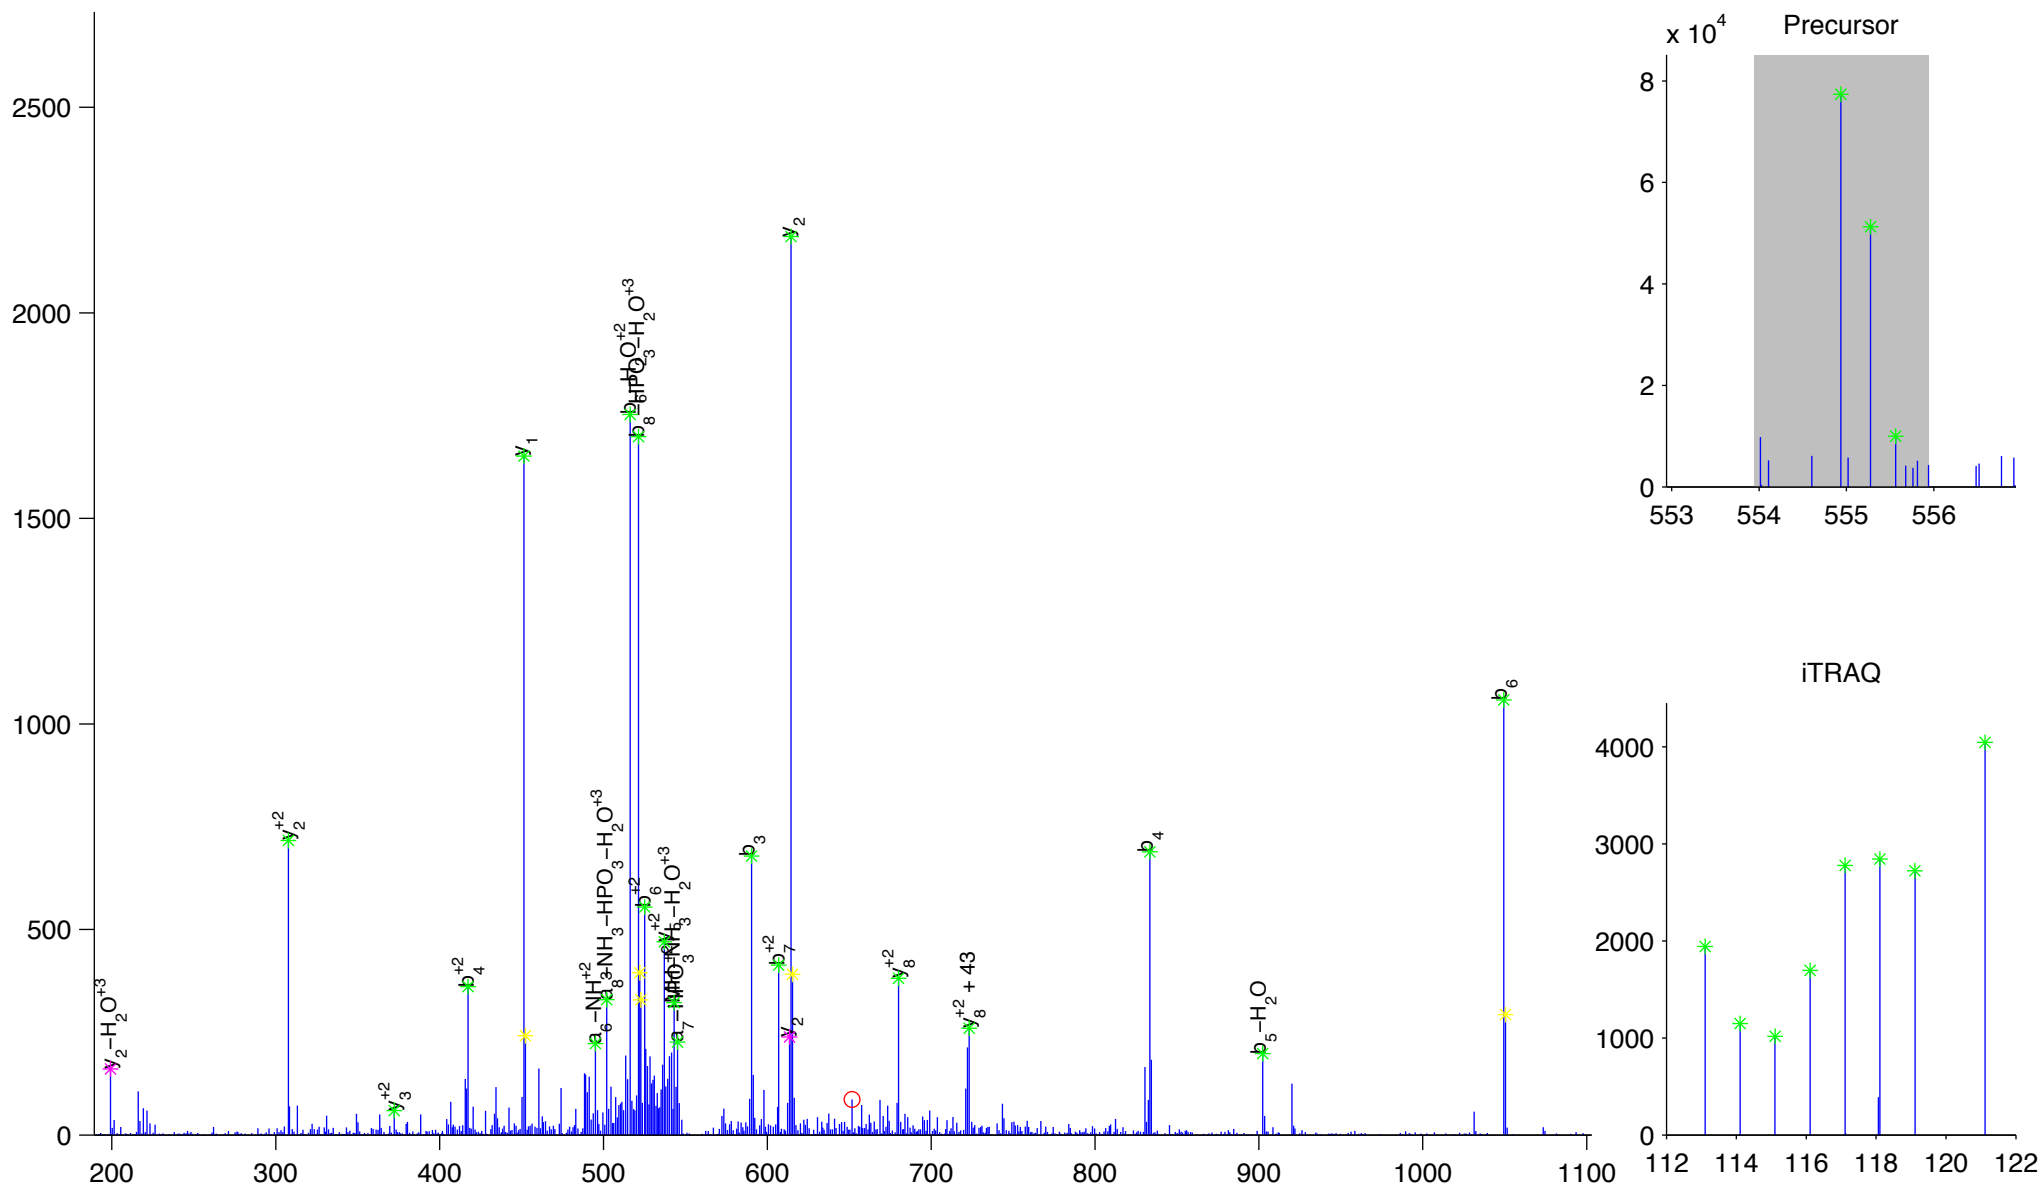

I [A] P [c] P [S] Q [D] S [L] y [S] D [P] L [D] S [T] S [A] Q [A] G [E] G [V] Q [R]

docking protein 1 [Homo sapiens]

Charge State: +3

Scan Number: 7210

File Name: HJ050711\_GBMs\_xeno\_bio1\_E\_HANNAH.raw

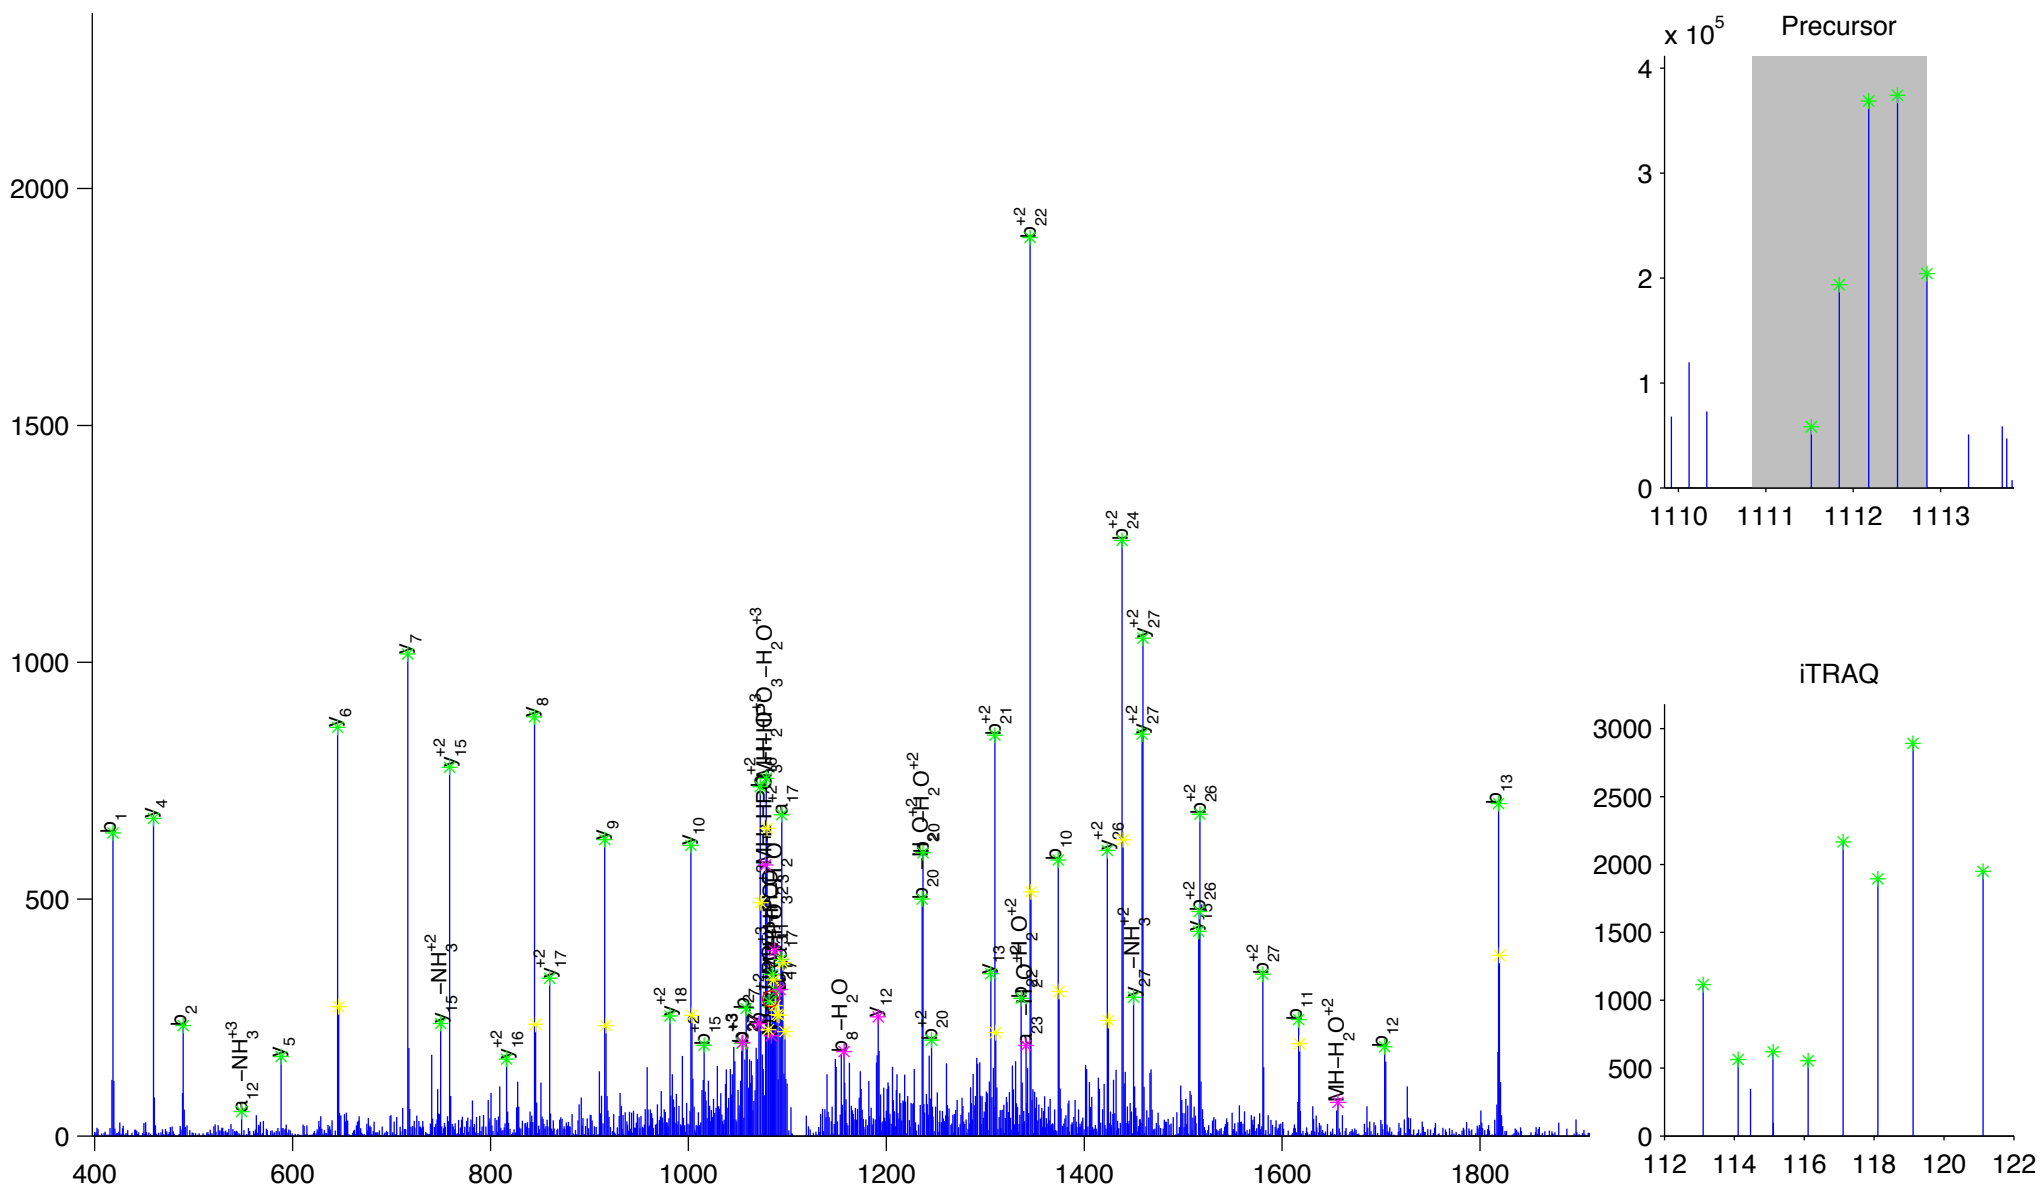

L [ P ] S [ P ] P [ G ] P [ Q ] E [ L ] L [ D ] S [ P ] P [ A ] L y A E P [ L ] D [ S ] L [ R ]

docking protein 1 [Homo sapiens]

Charge State: +3

Scan Number: 9980

File Name: HJ050711\_GBMxeno\_bio1\_E\_HANNAH.raw

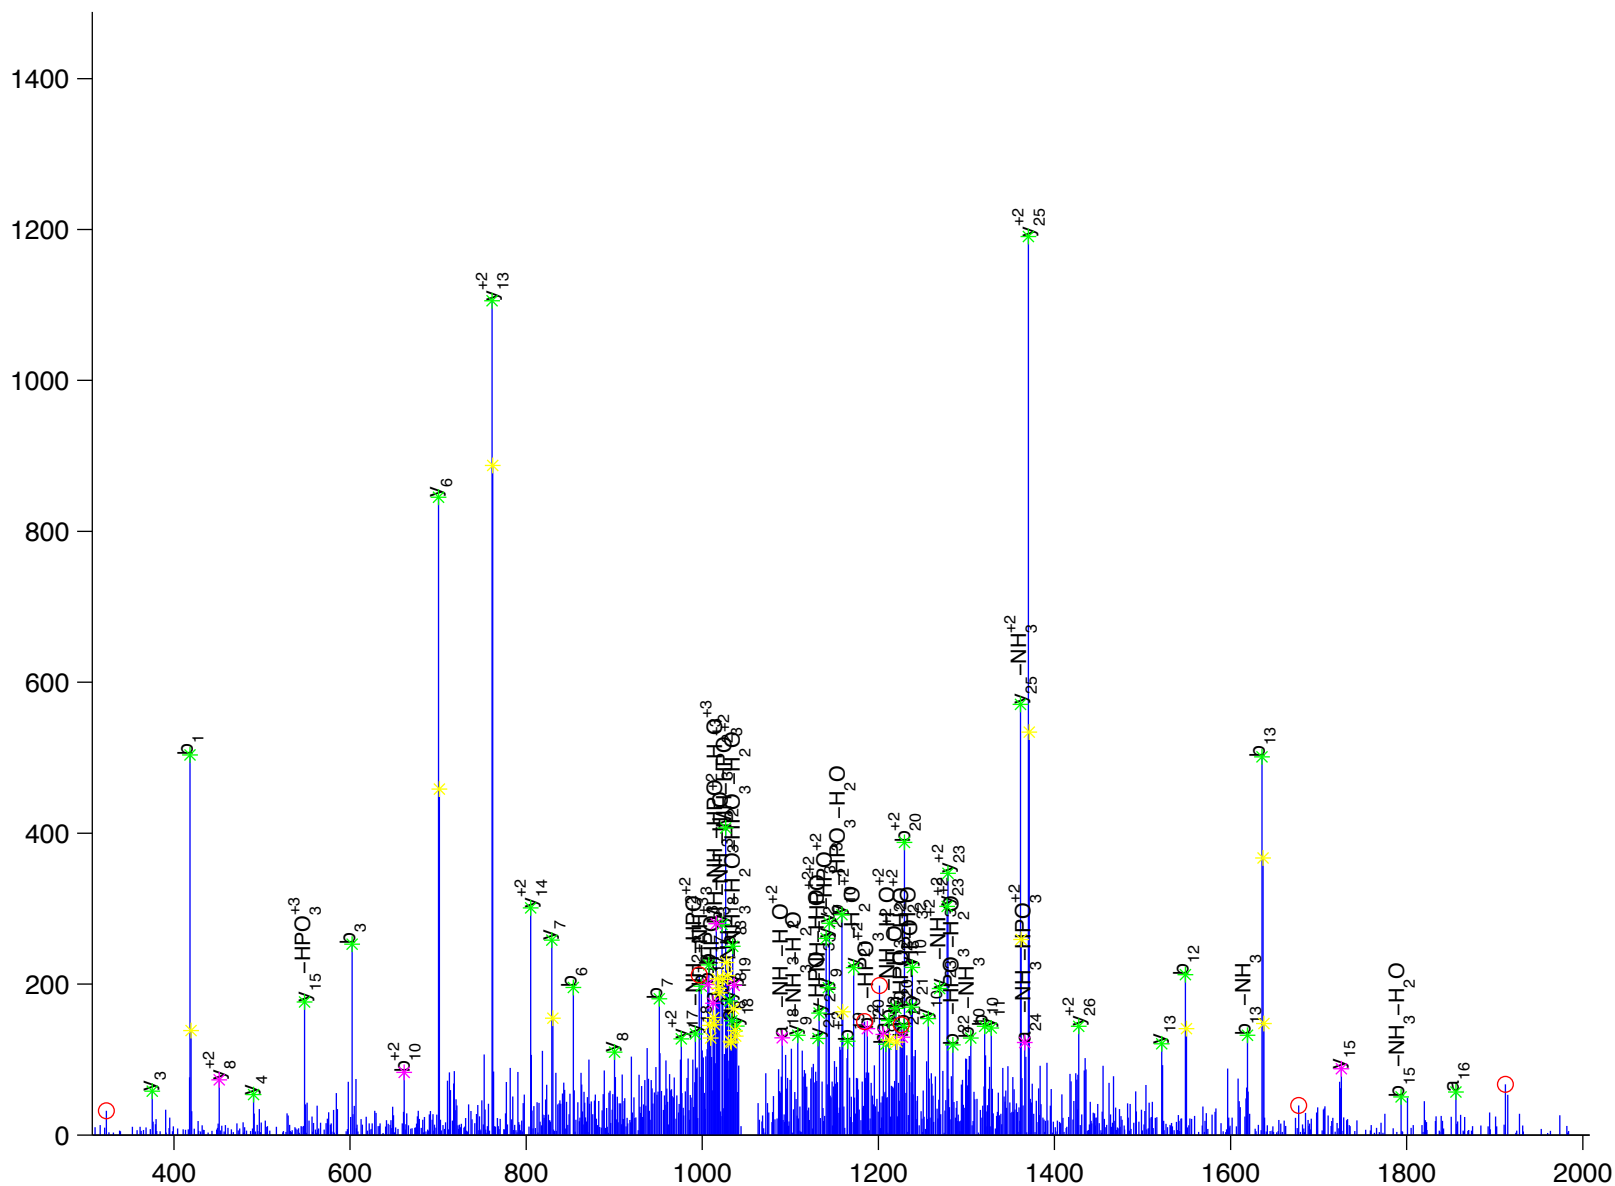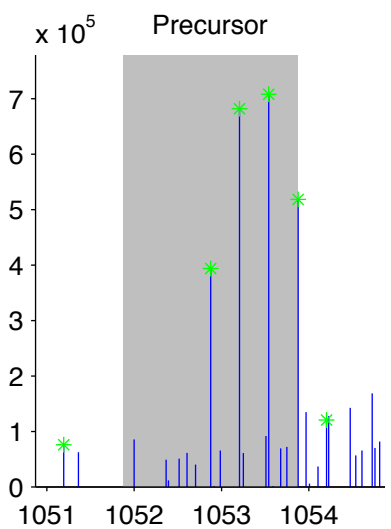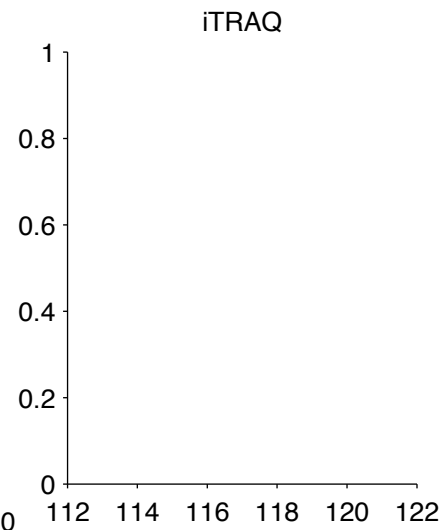

y [ Q ] [ E ] [ Q ] [ G ] [ G ] [ E ] [ A ] [ S ] [ P ] [ Q ] [ R ]

drebrin-like isoform b [Homo sapiens]

Charge State: +2

Scan Number: 2306

File Name: HJ050711\_GBMxeno\_bio1\_E\_HANNAH.raw

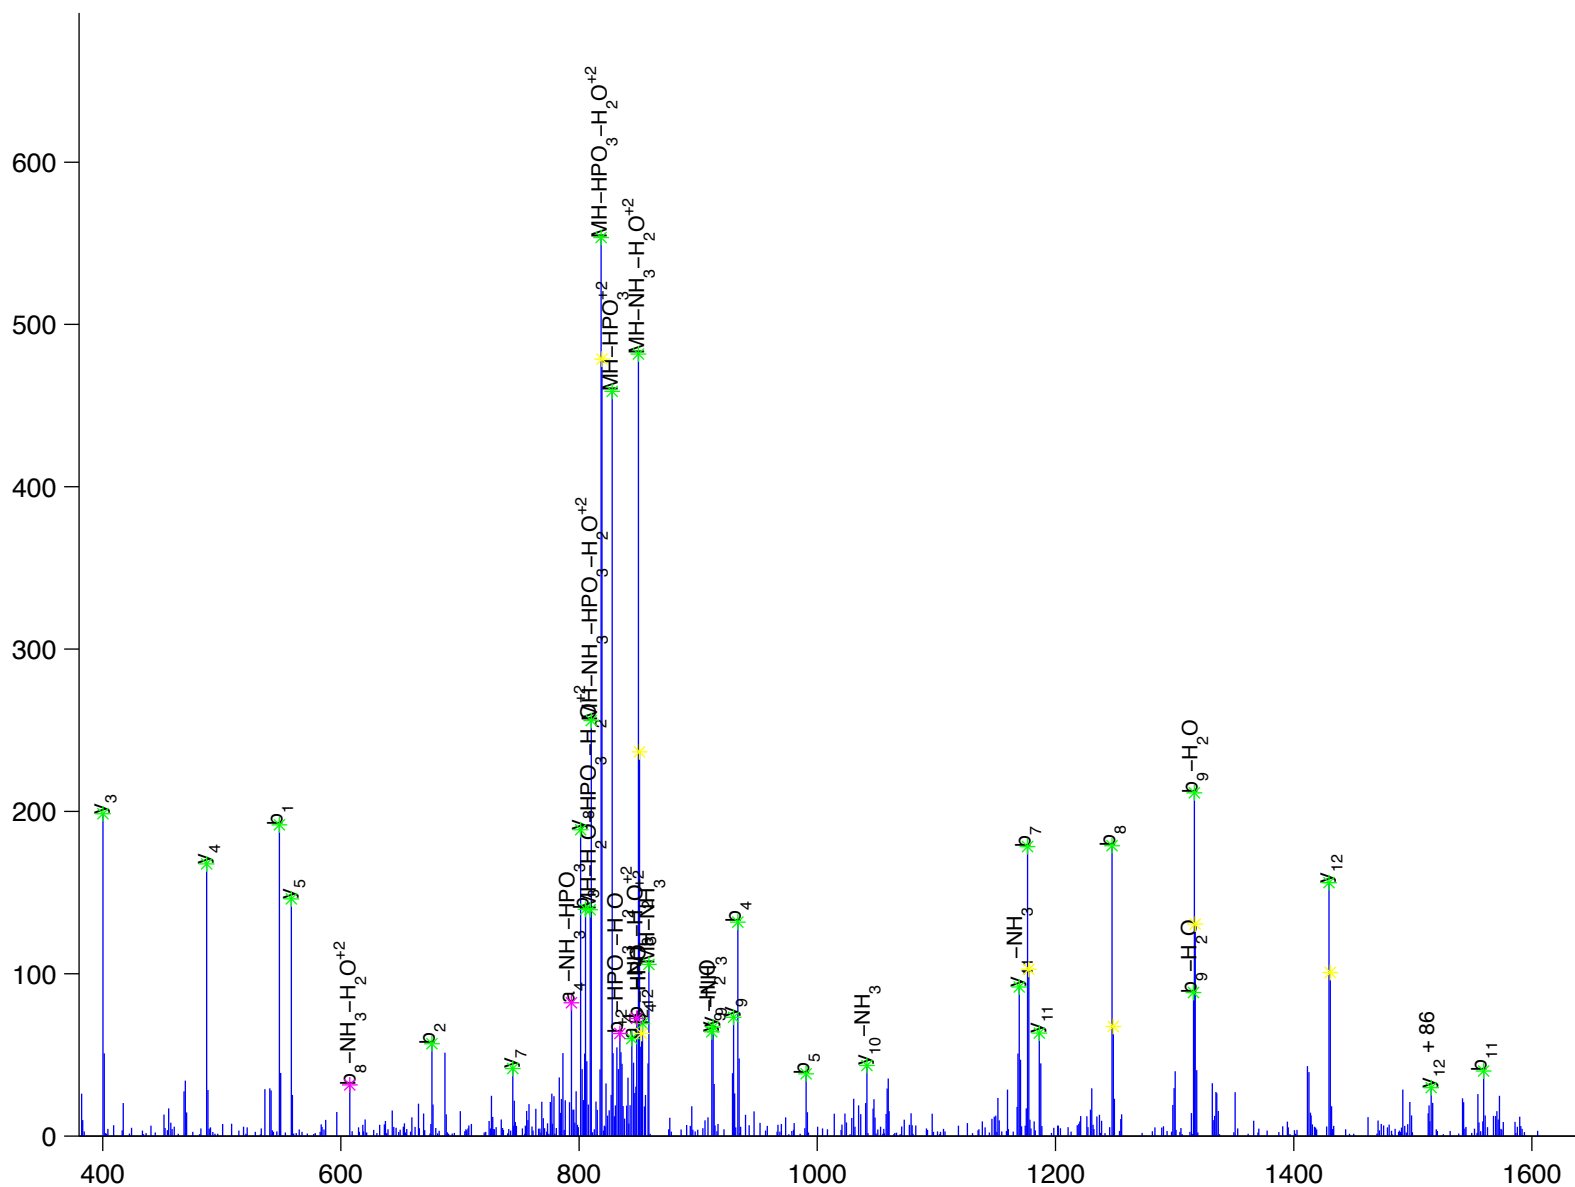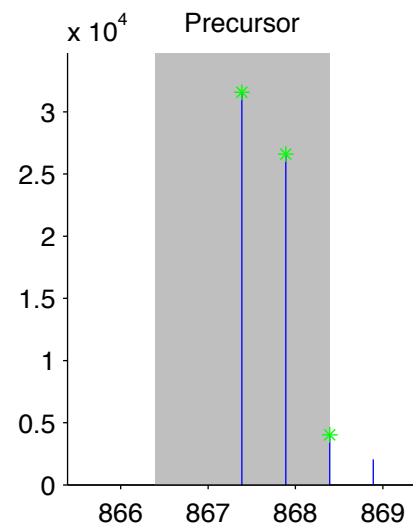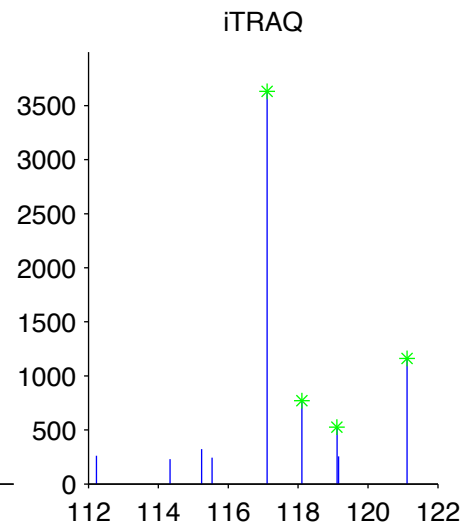

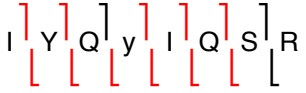

dual-specificity tyrosine-(Y)-phosphorylation regulated kinase 1B isoform a [Homo sapiens]

Charge State: +2

Scan Number: 6912

File Name: HJ050711\_GBMxeno\_bio1\_E\_HANNAH.raw

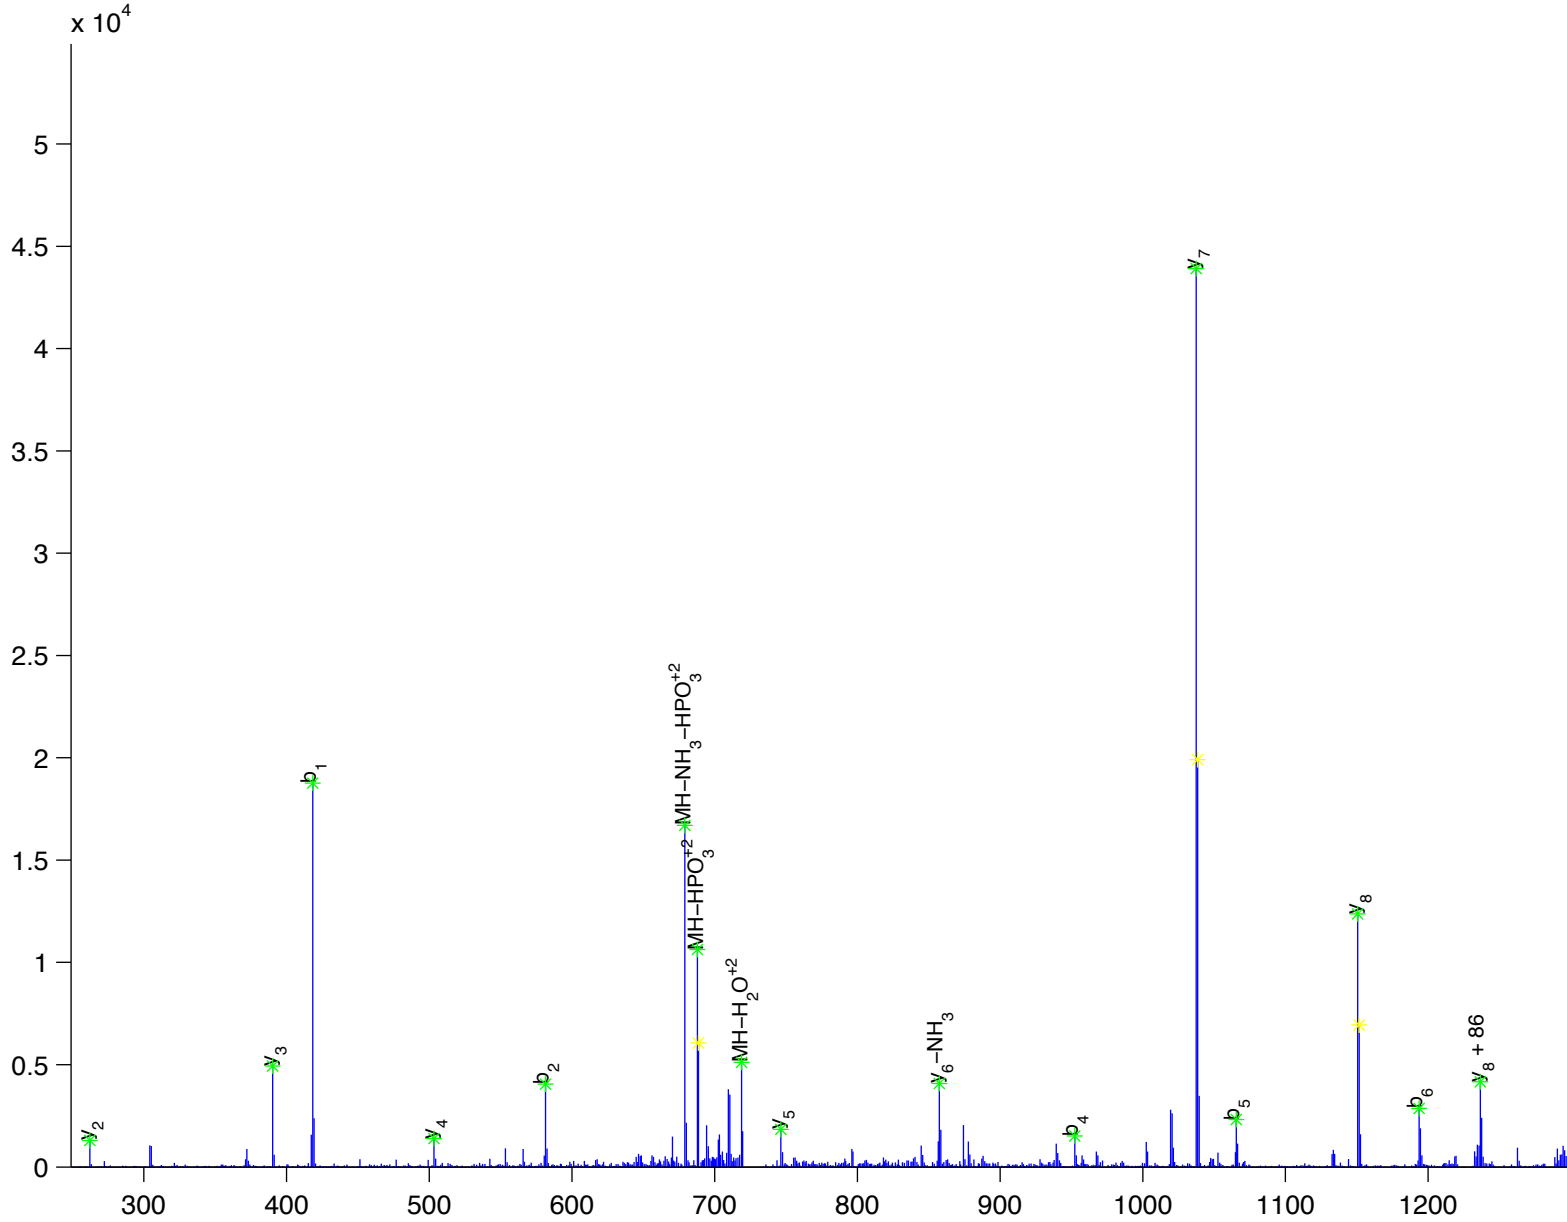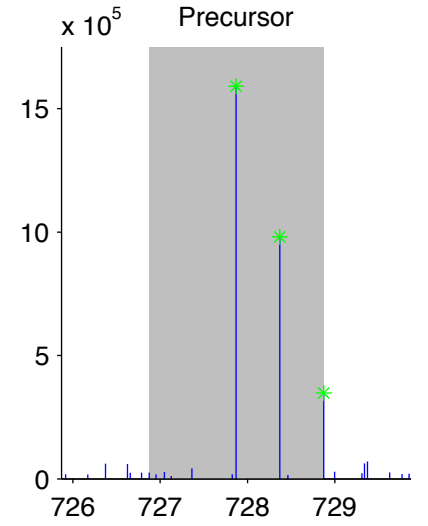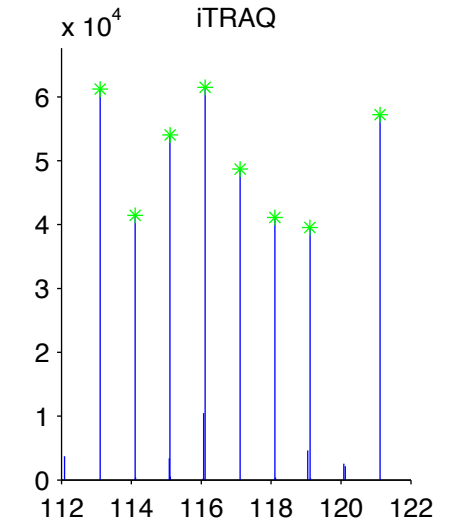

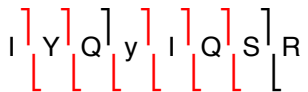

dual-specificity tyrosine-(Y)-phosphorylation regulated kinase 1B isoform a [Homo sapiens]

Charge State: +2

Scan Number: 6975

File Name: HJ050711\_GBMxeno\_bio1\_E\_HANNAH.raw

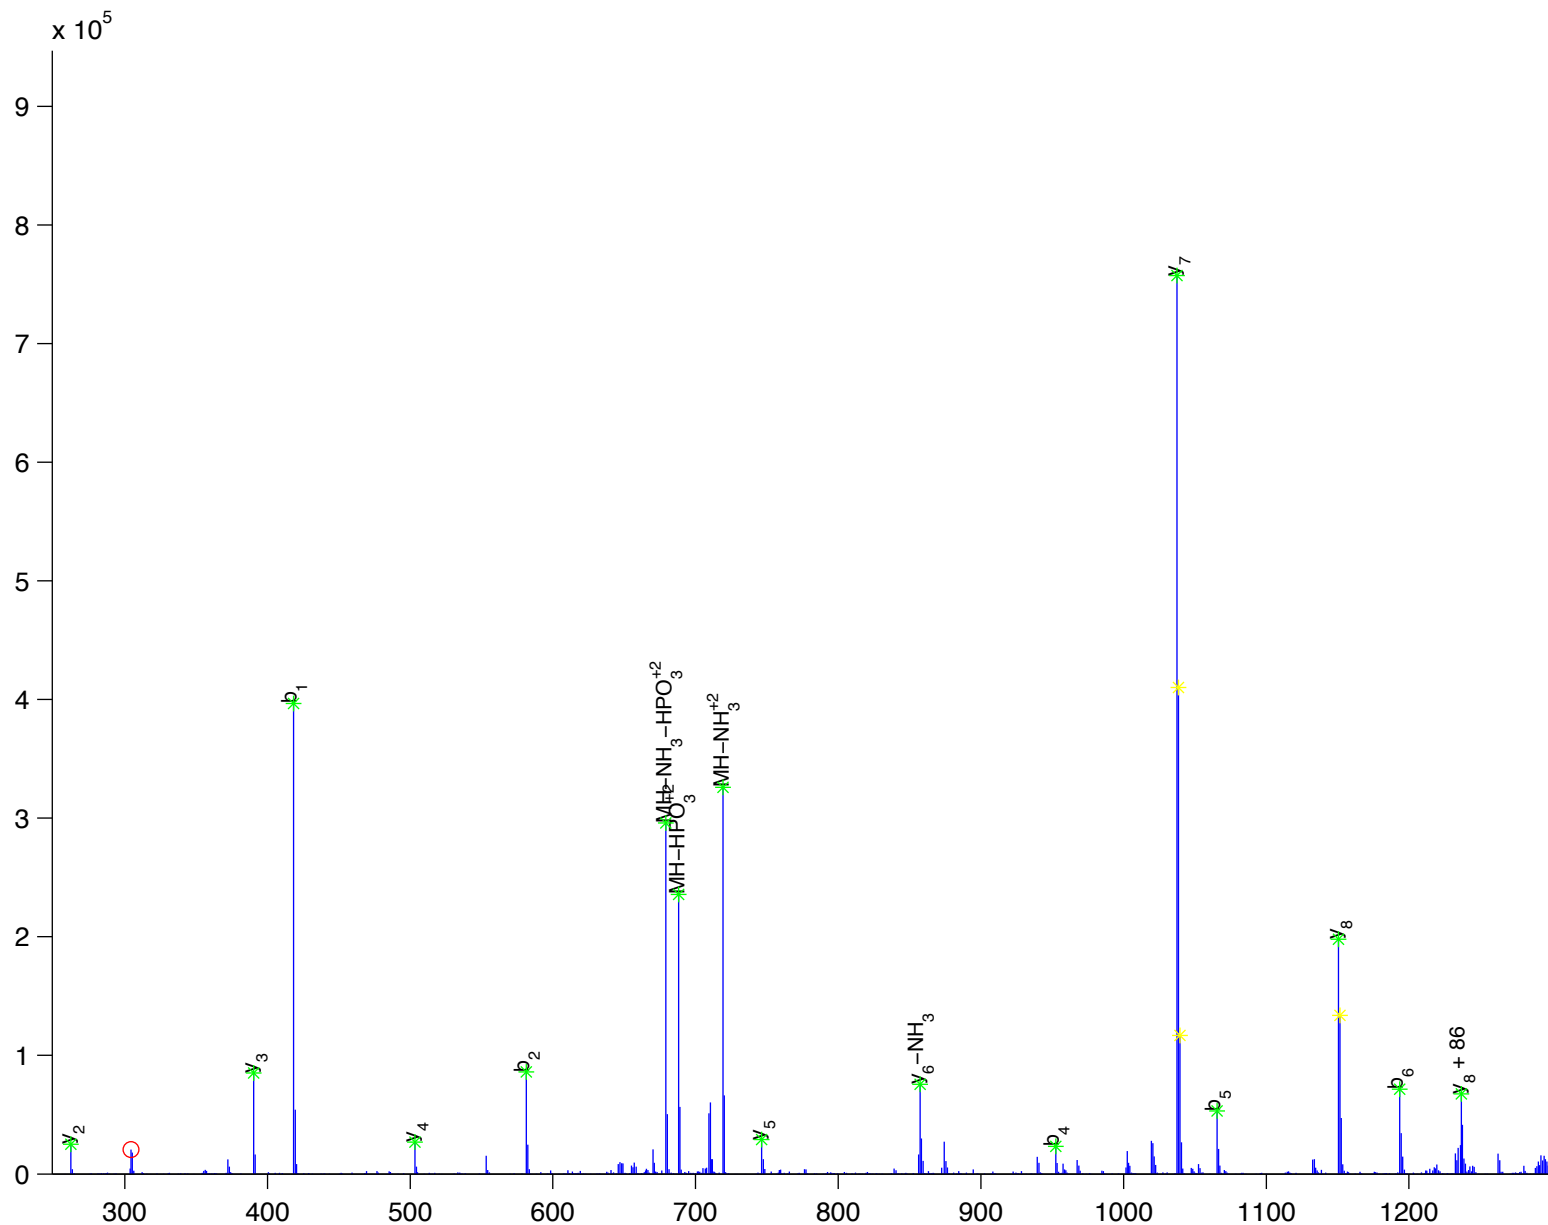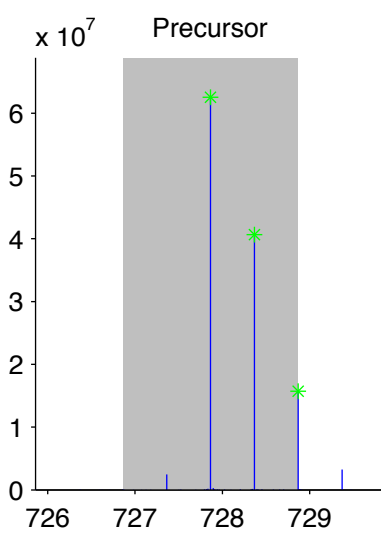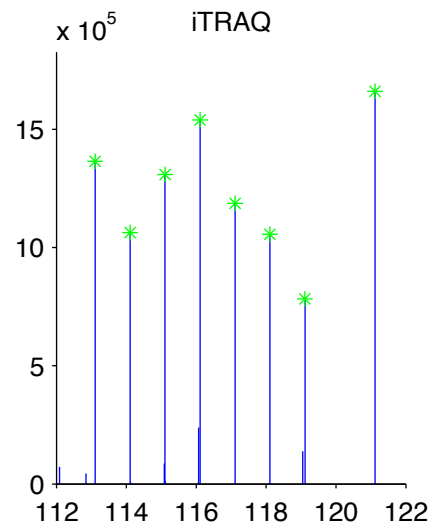

$y$ 

|   |   |   |   |   |   |   |   |
|---|---|---|---|---|---|---|---|
| A | D | L | P | G | I | A | R |
|---|---|---|---|---|---|---|---|

dynactin 2 [Homo sapiens]

Charge State: +2

Scan Number: 6660

File Name: HJ050711\_GBMxeno\_bio1\_E\_HANNAH.raw

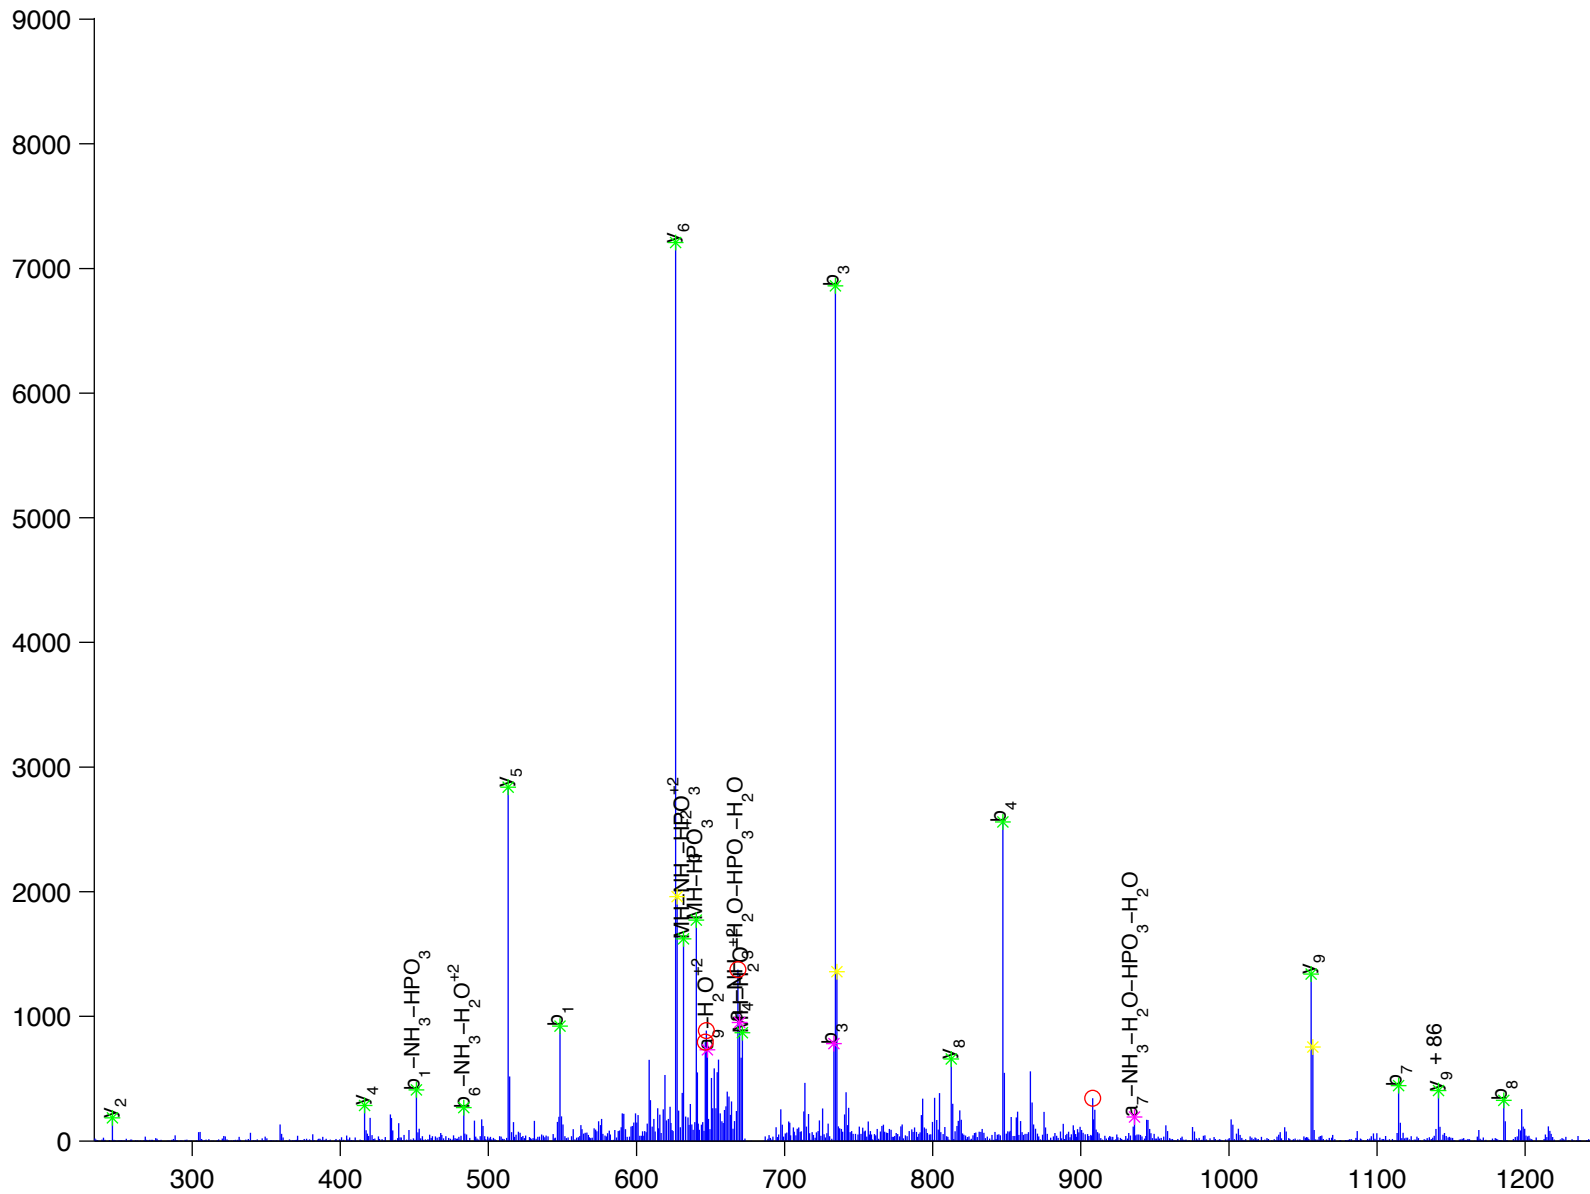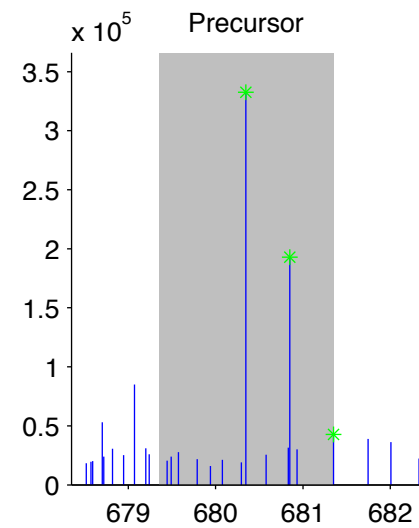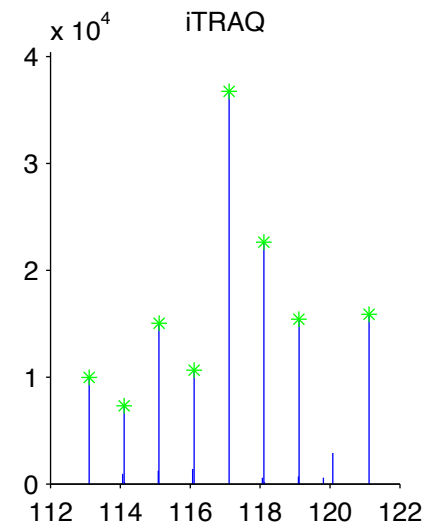

y [ F ] D [ S ] G [ D ] Y [ N ] m [ A ] K

endosulfine alpha isoform 3 [Homo sapiens]

Charge State: +3

Scan Number: 5616

File Name: HJ050711\_GBMxeno\_bio1\_E\_HANNAH.raw

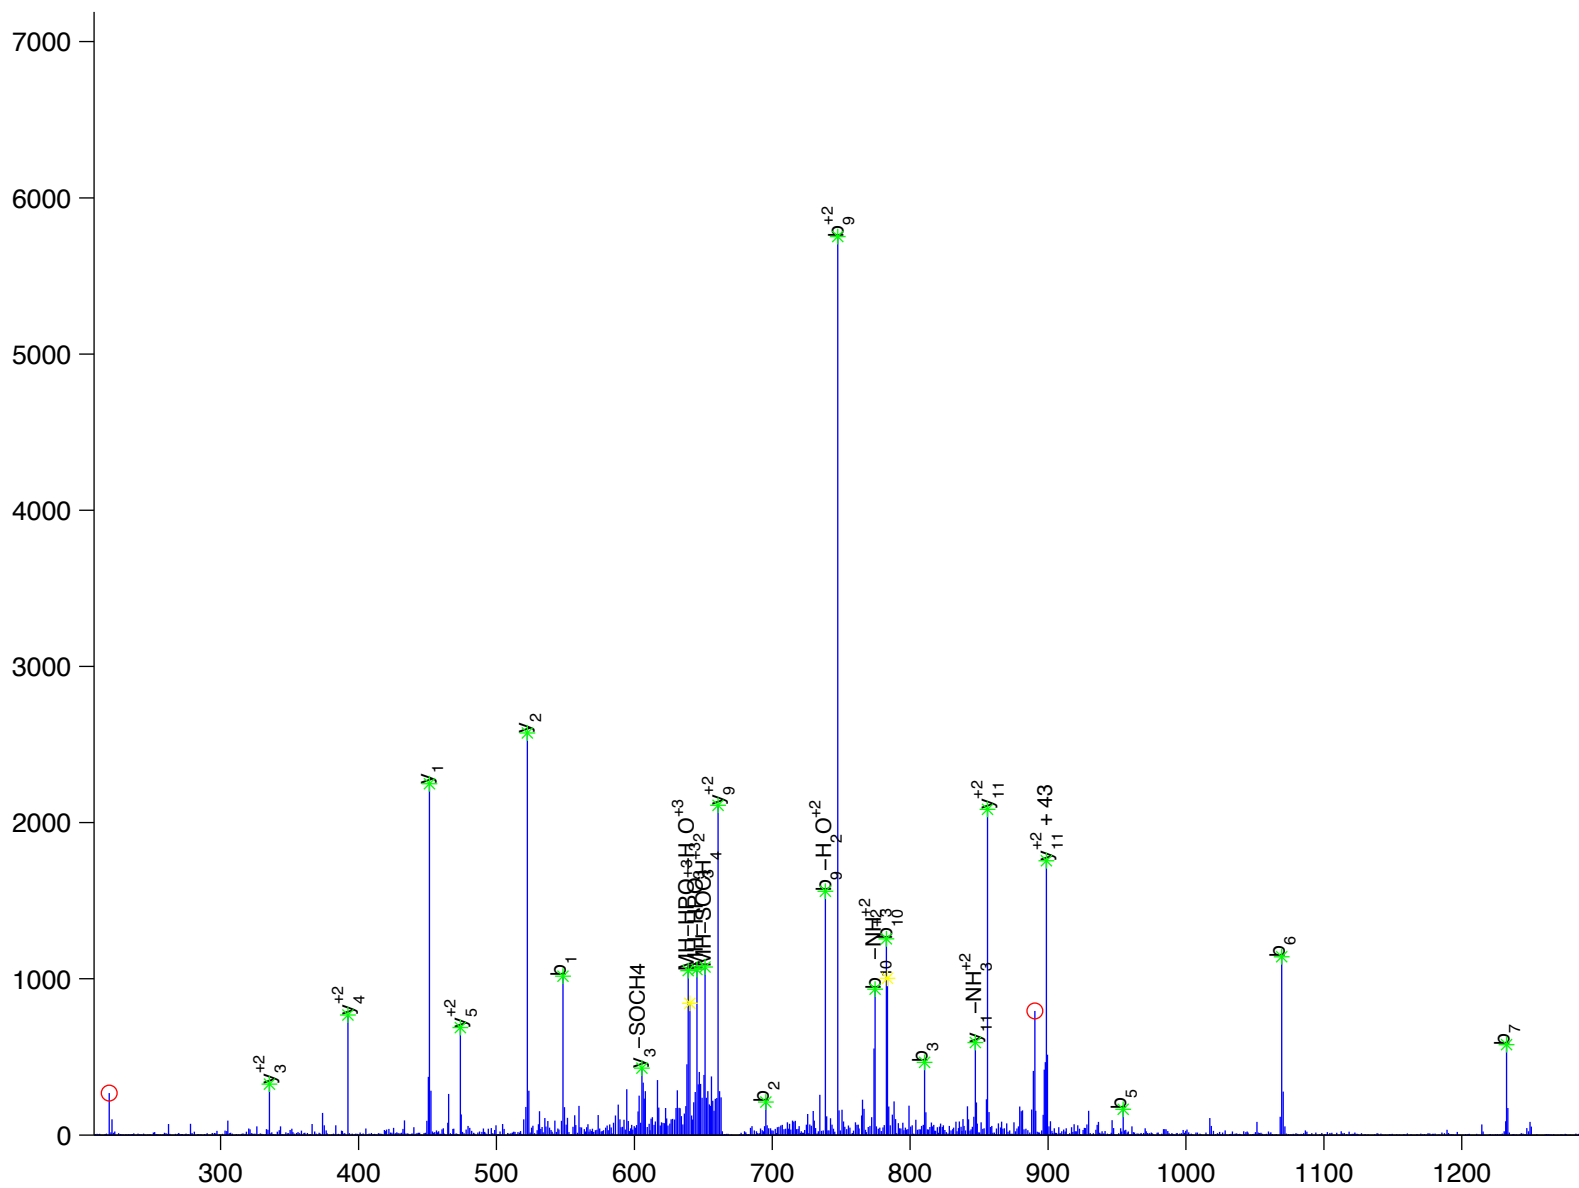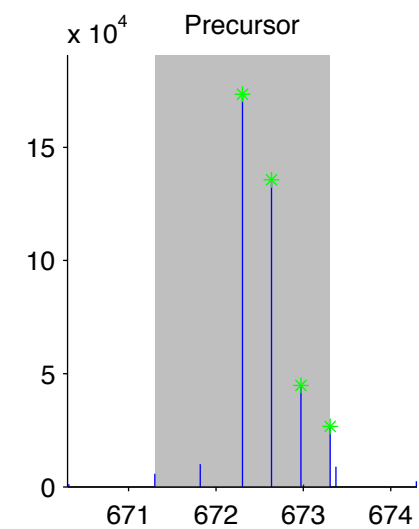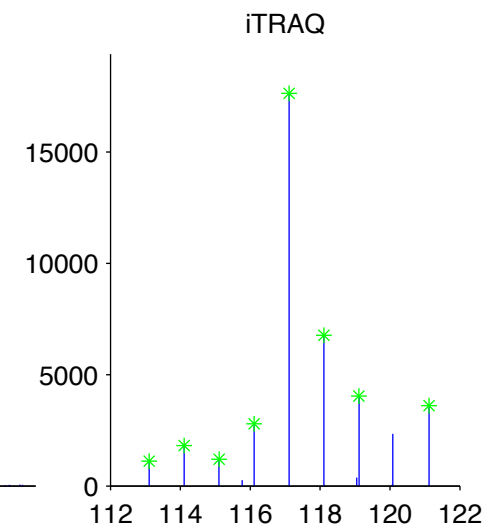



A [N] [D] [H] [G] [y] [D] [N] [F] [R]

endothelin receptor type B isoform 1 [Homo sapiens]

Charge State: +2

Scan Number: 3010

File Name: HJ050711\_GBMxeno\_bio1\_E\_HANNAH.raw

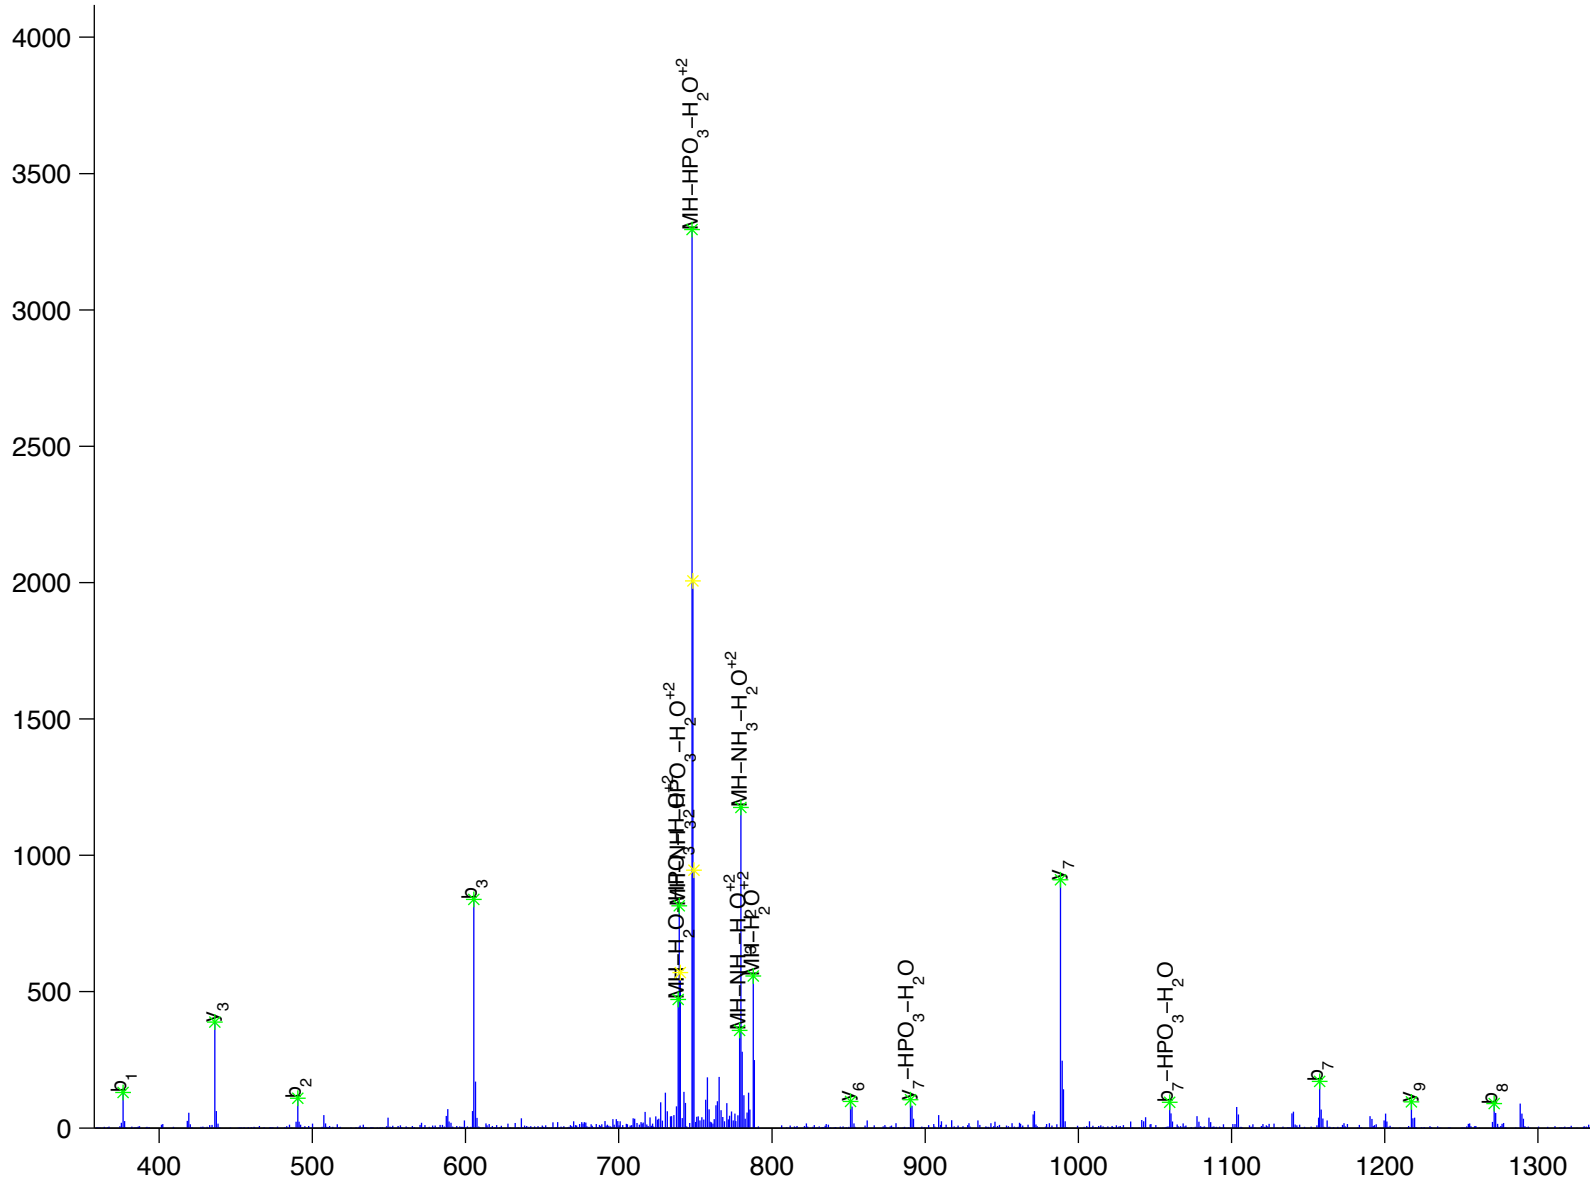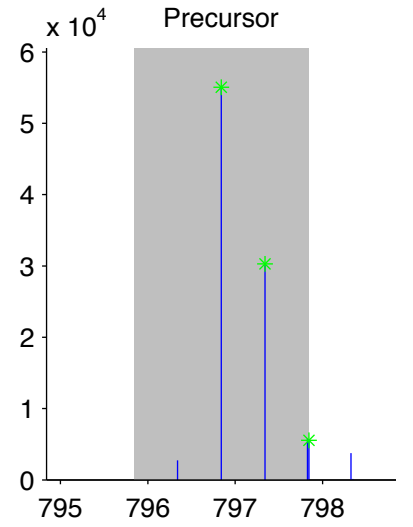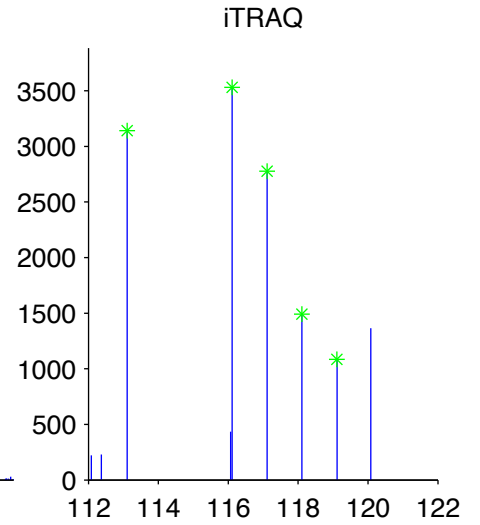

A[A[V[P[S[G]A[S]T[G]I]y]E]A[L]E[L]R

enolase 1 [Homo sapiens]

Charge State: +3

Scan Number: 8781

File Name: HJ050711\_GBMxeno\_bio1\_E\_HANNAH.raw

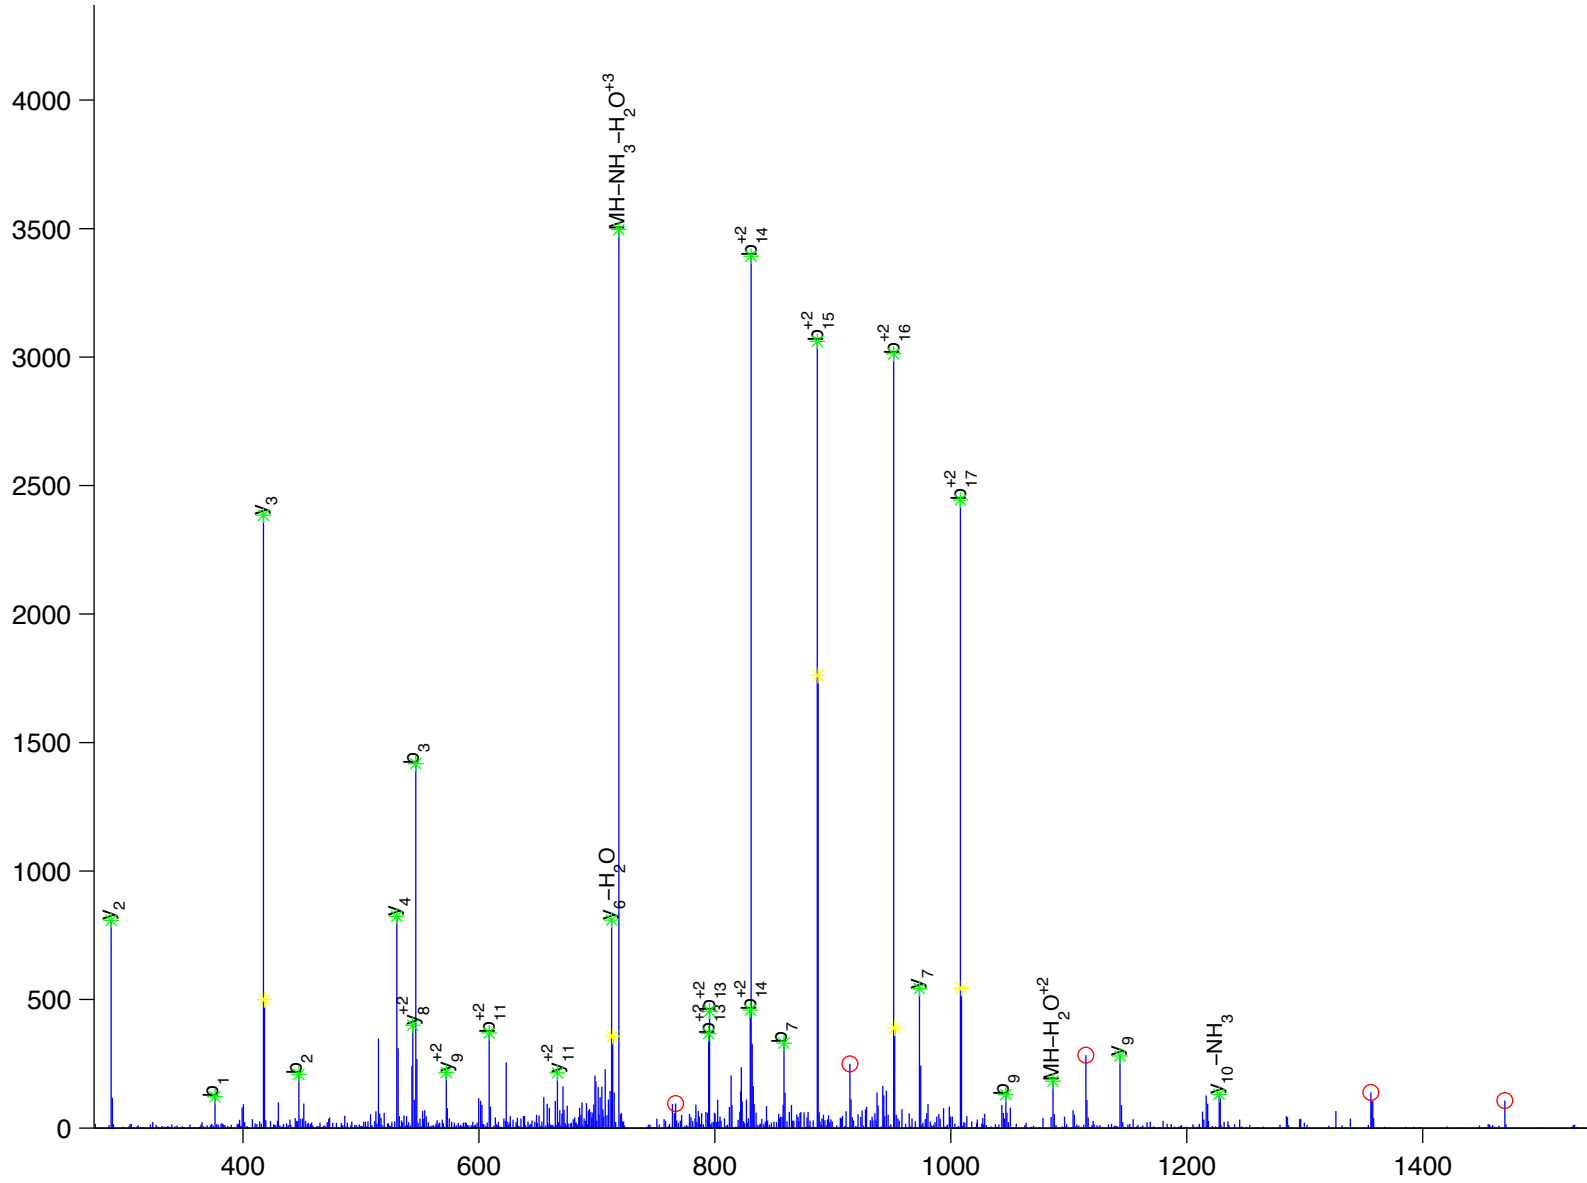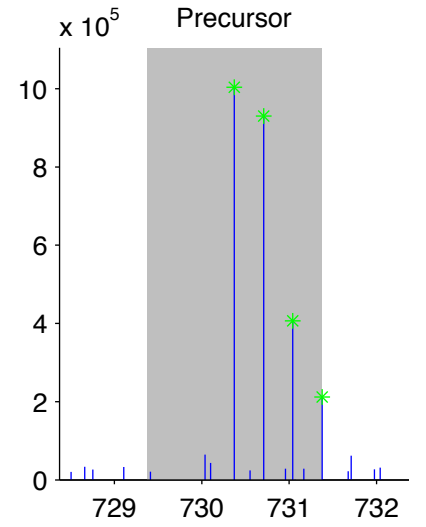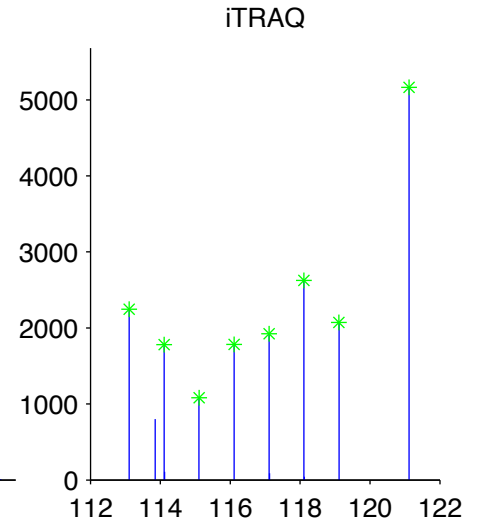

S [ F ] I [ K ] D [ y ] P [ V ] V [ S ] I [ E ] D [ P ] F [ D ] Q [ D ] D [ W ] G [ A ] W [ Q ] K

enolase 1 [Homo sapiens]

Charge State: +4

Scan Number: 9621

File Name: HJ050711\_GBMxeno\_bio1\_E\_HANNAH.raw

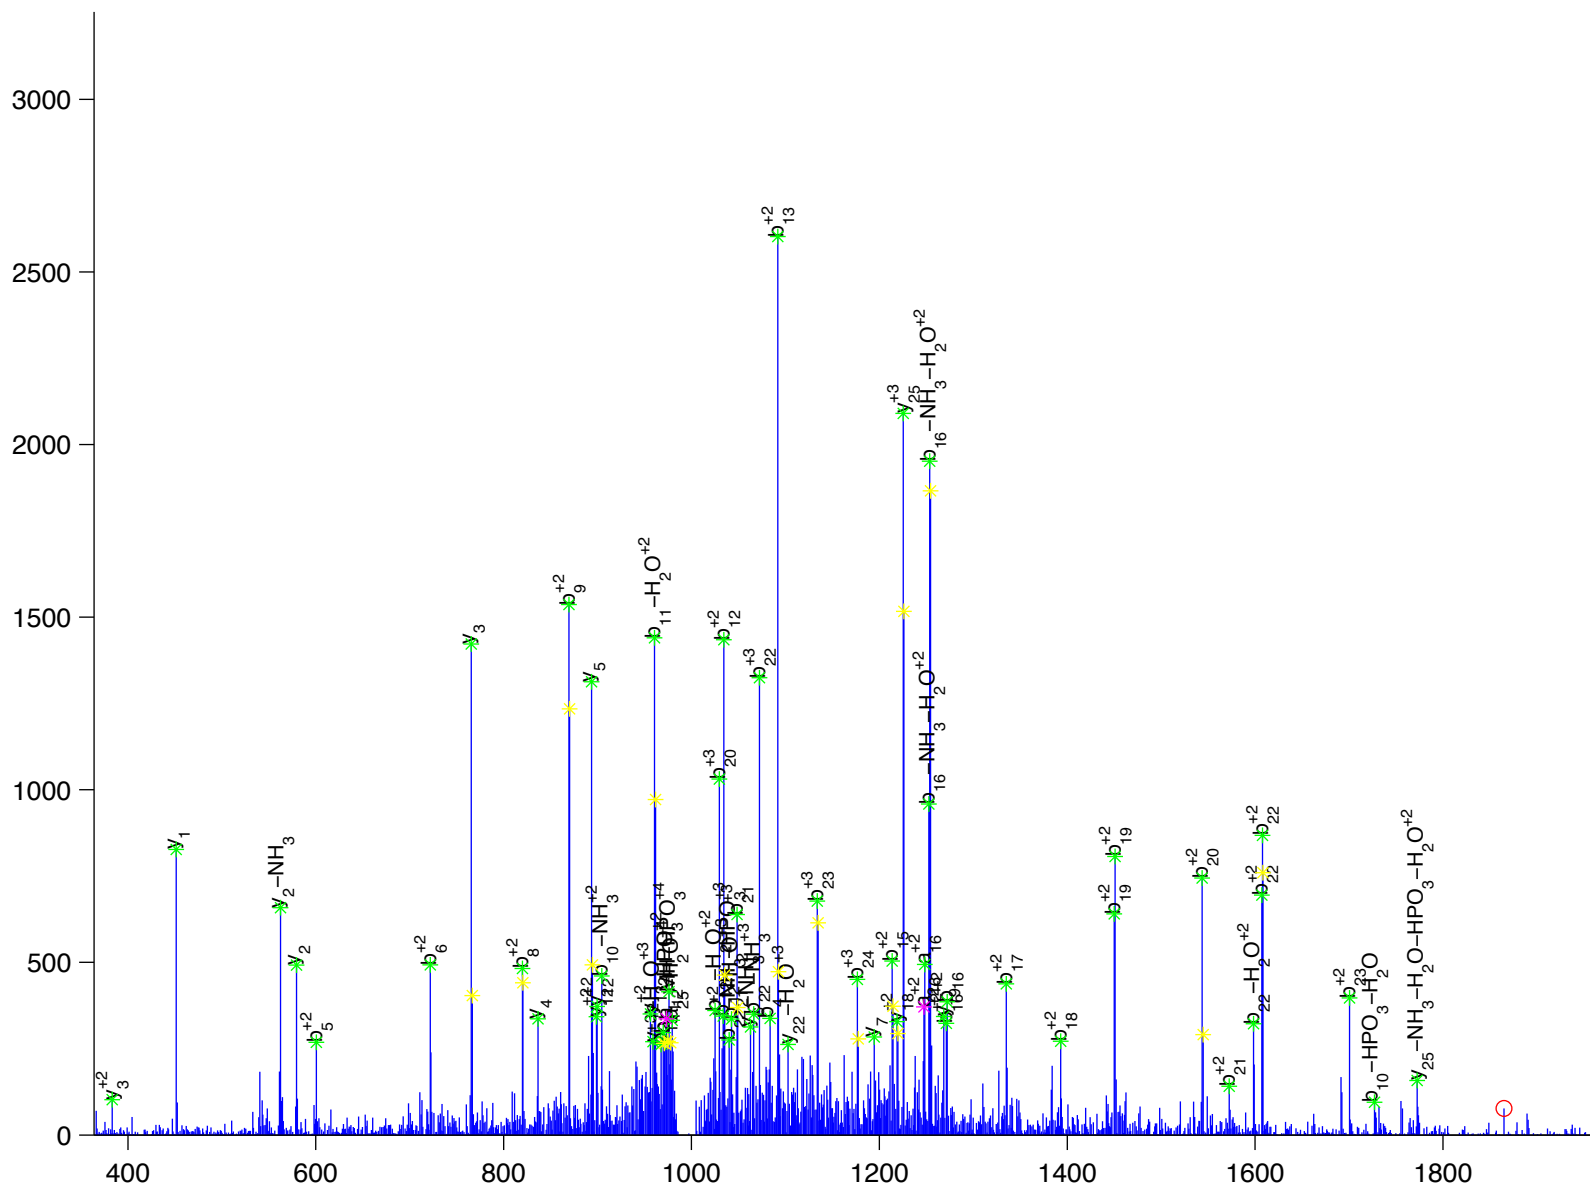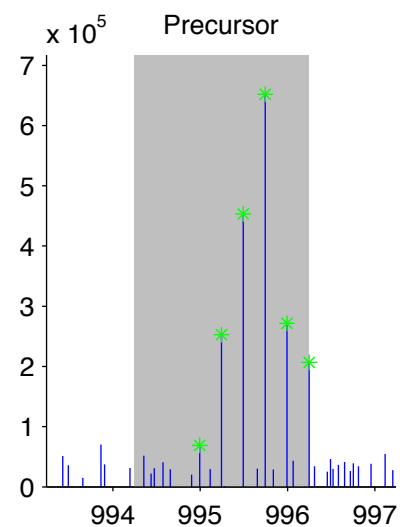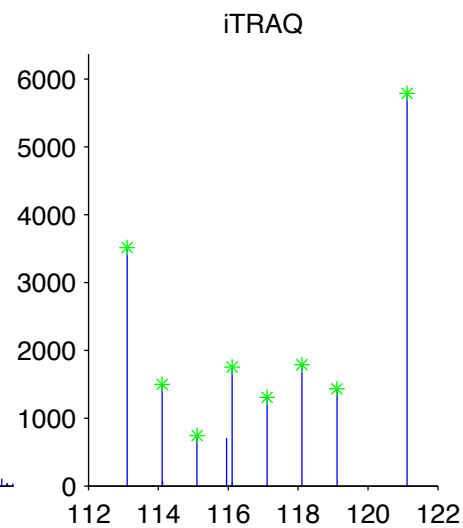

T [ Y ] V [ D ] P [ H ] T [ y ] E [ D ] P [ N ] Q [ A ] V [ L ] K

ephrin receptor EphA2 [Homo sapiens]

Charge State: +3

Scan Number: 5792

File Name: HJ050711\_GBMxeno\_bio1\_E\_HANNAH.raw

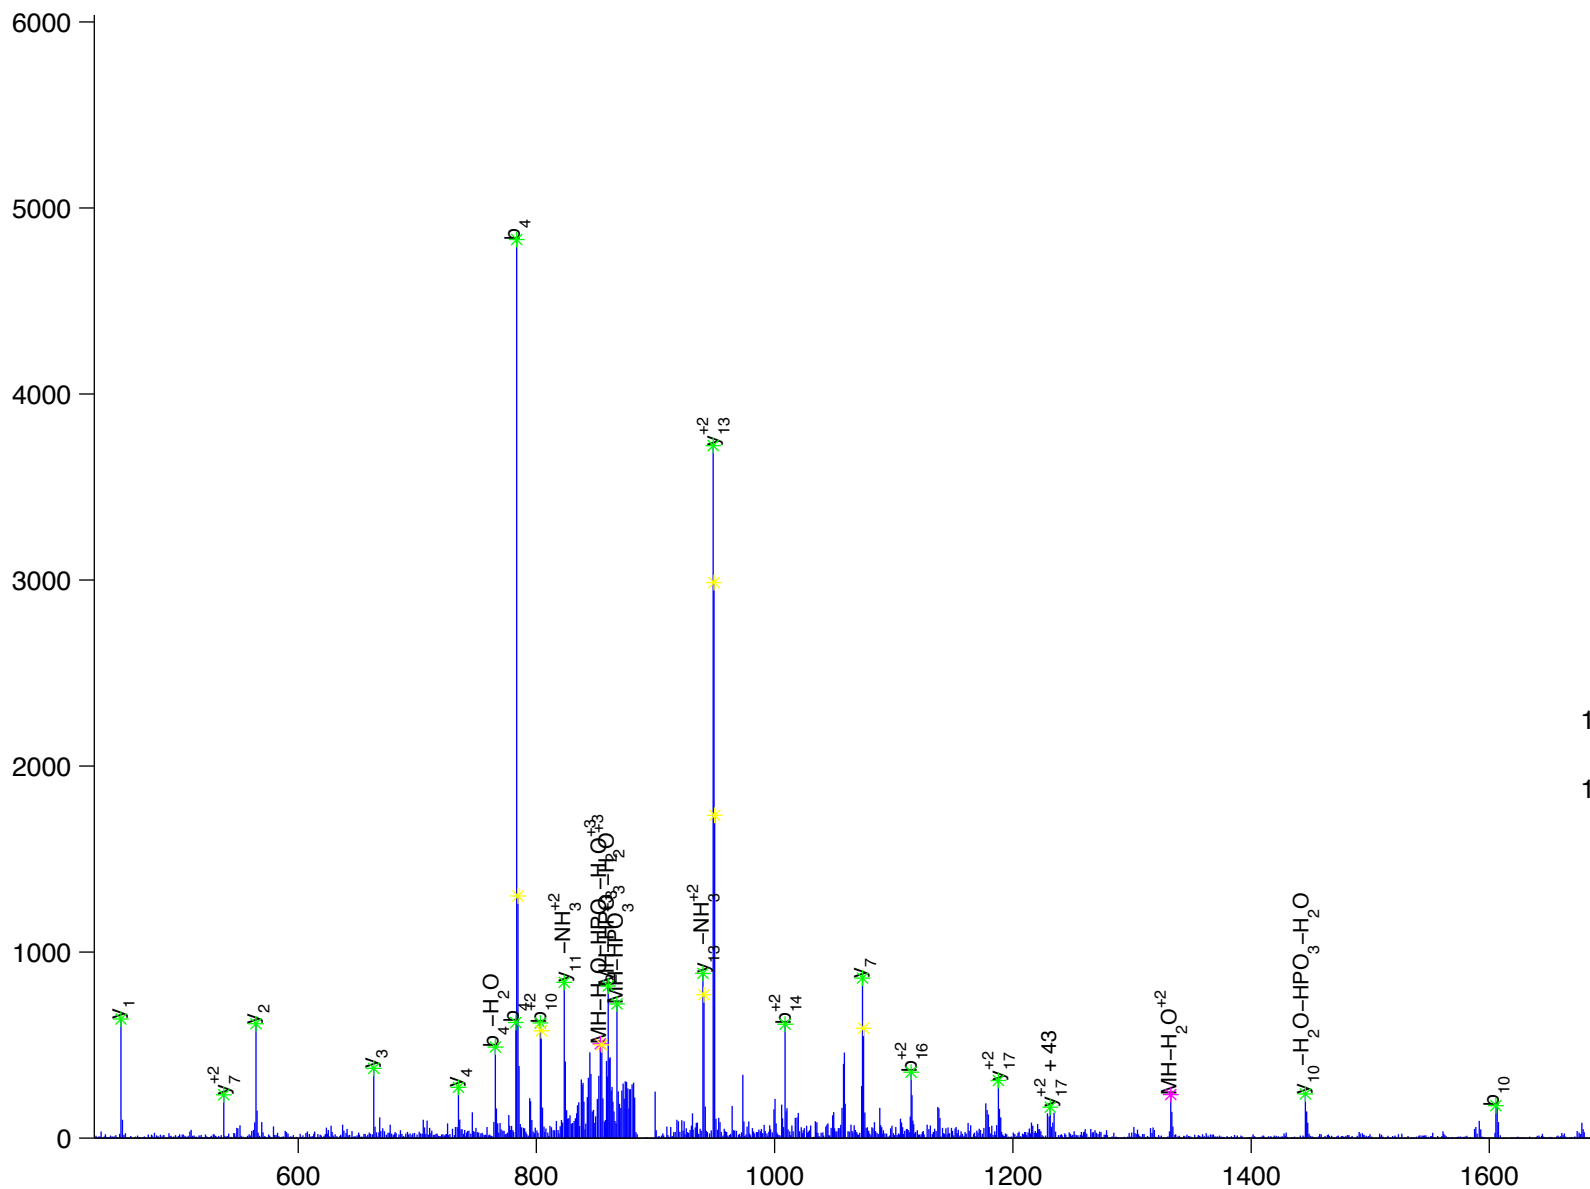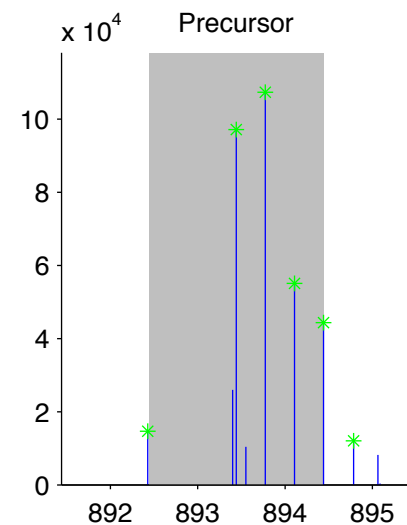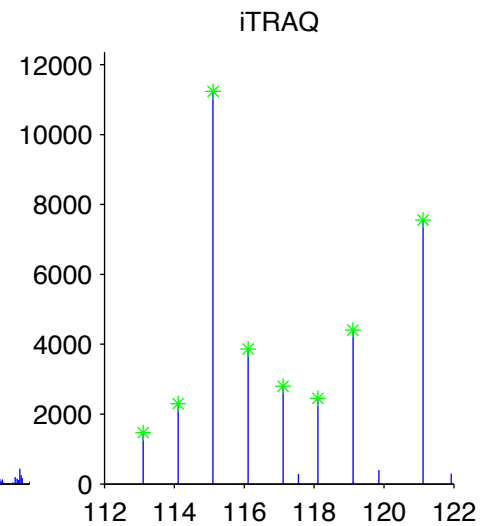

Q[S]P[E]D[V]y[F]S]K

ephrin receptor EphA2 [Homo sapiens]

Charge State: +3

Scan Number: 6030

File Name: HJ050711\_GBMxeno\_bio1\_E\_HANNAH.raw

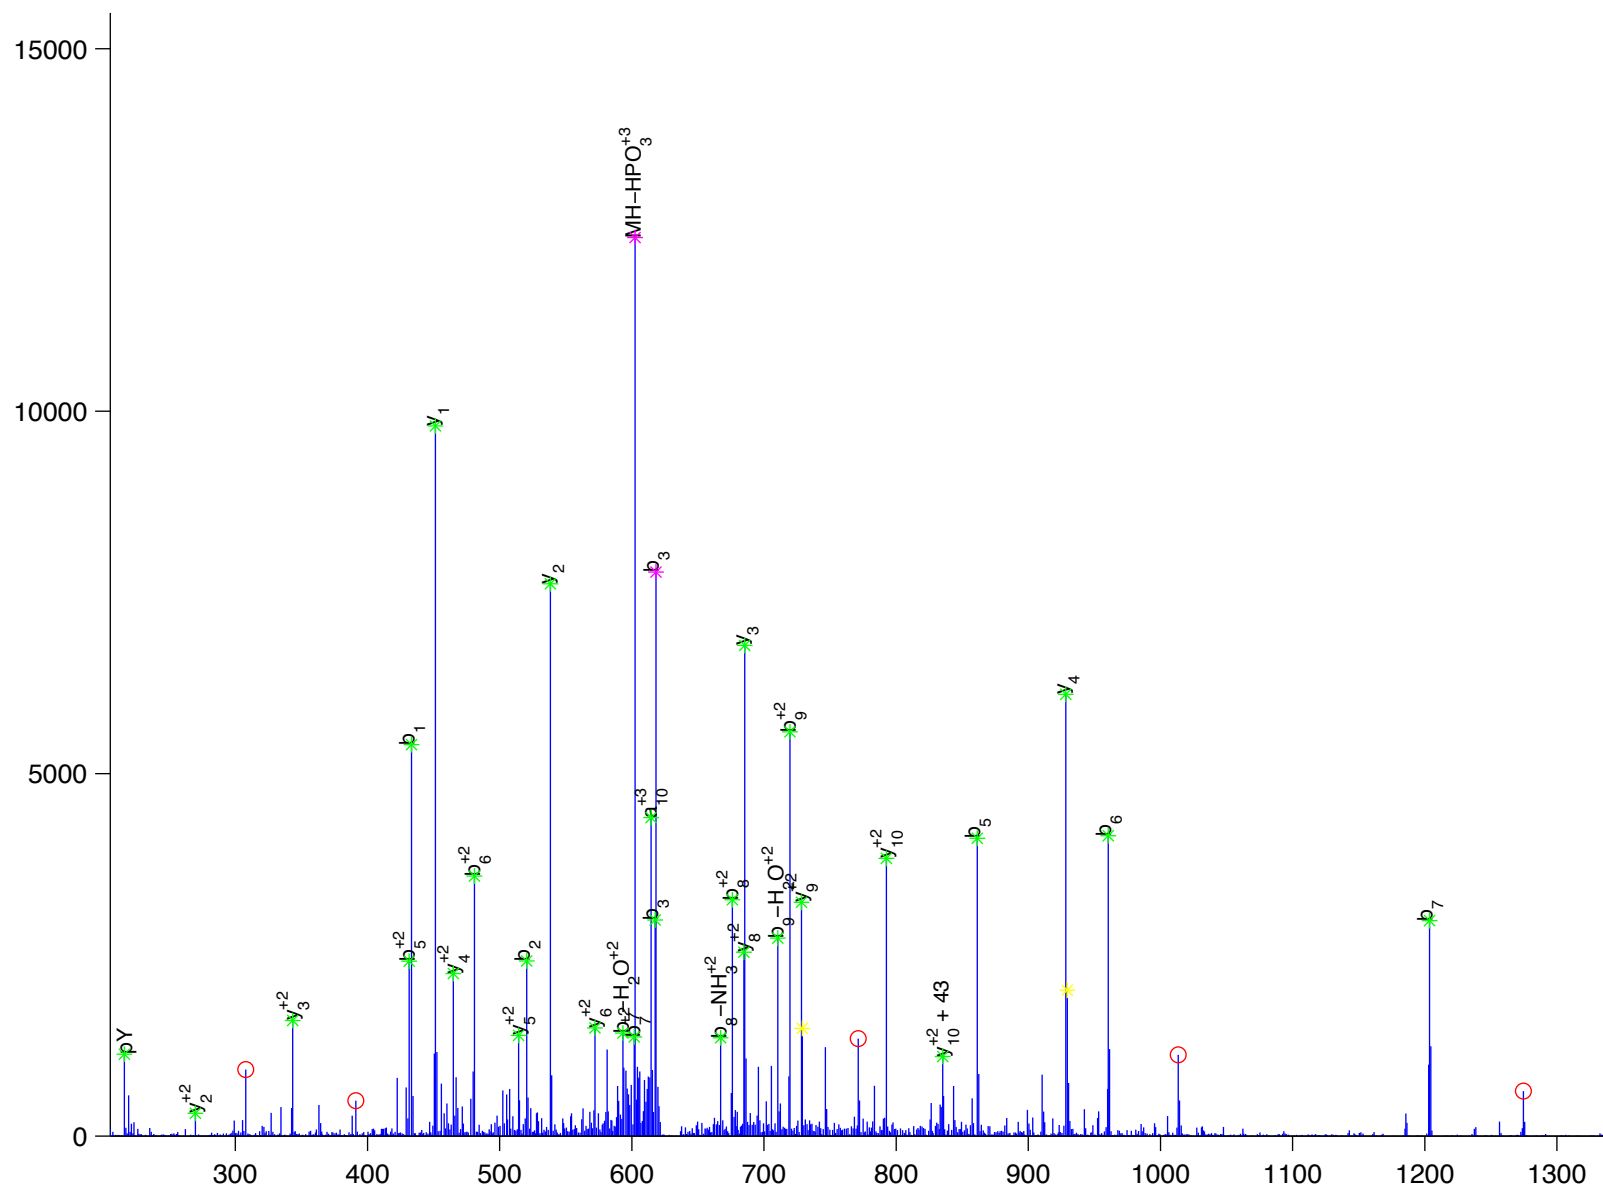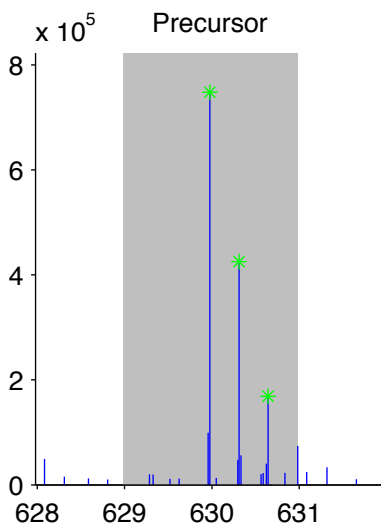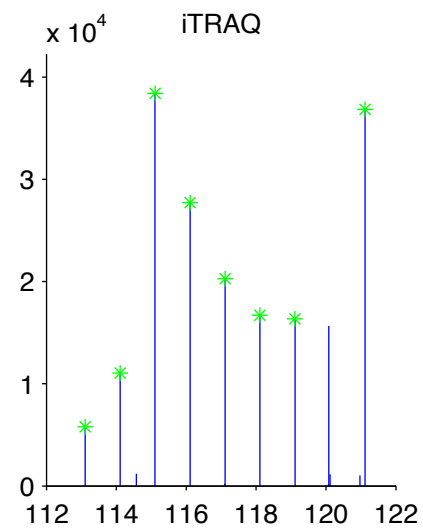

V L E D D P E A T y T T S G G K

ephrin receptor EphA2 [Homo sapiens]

Charge State: +2

Scan Number: 6237

File Name: HJ050711\_GBMxeno\_bio1\_E\_HANNAH.raw

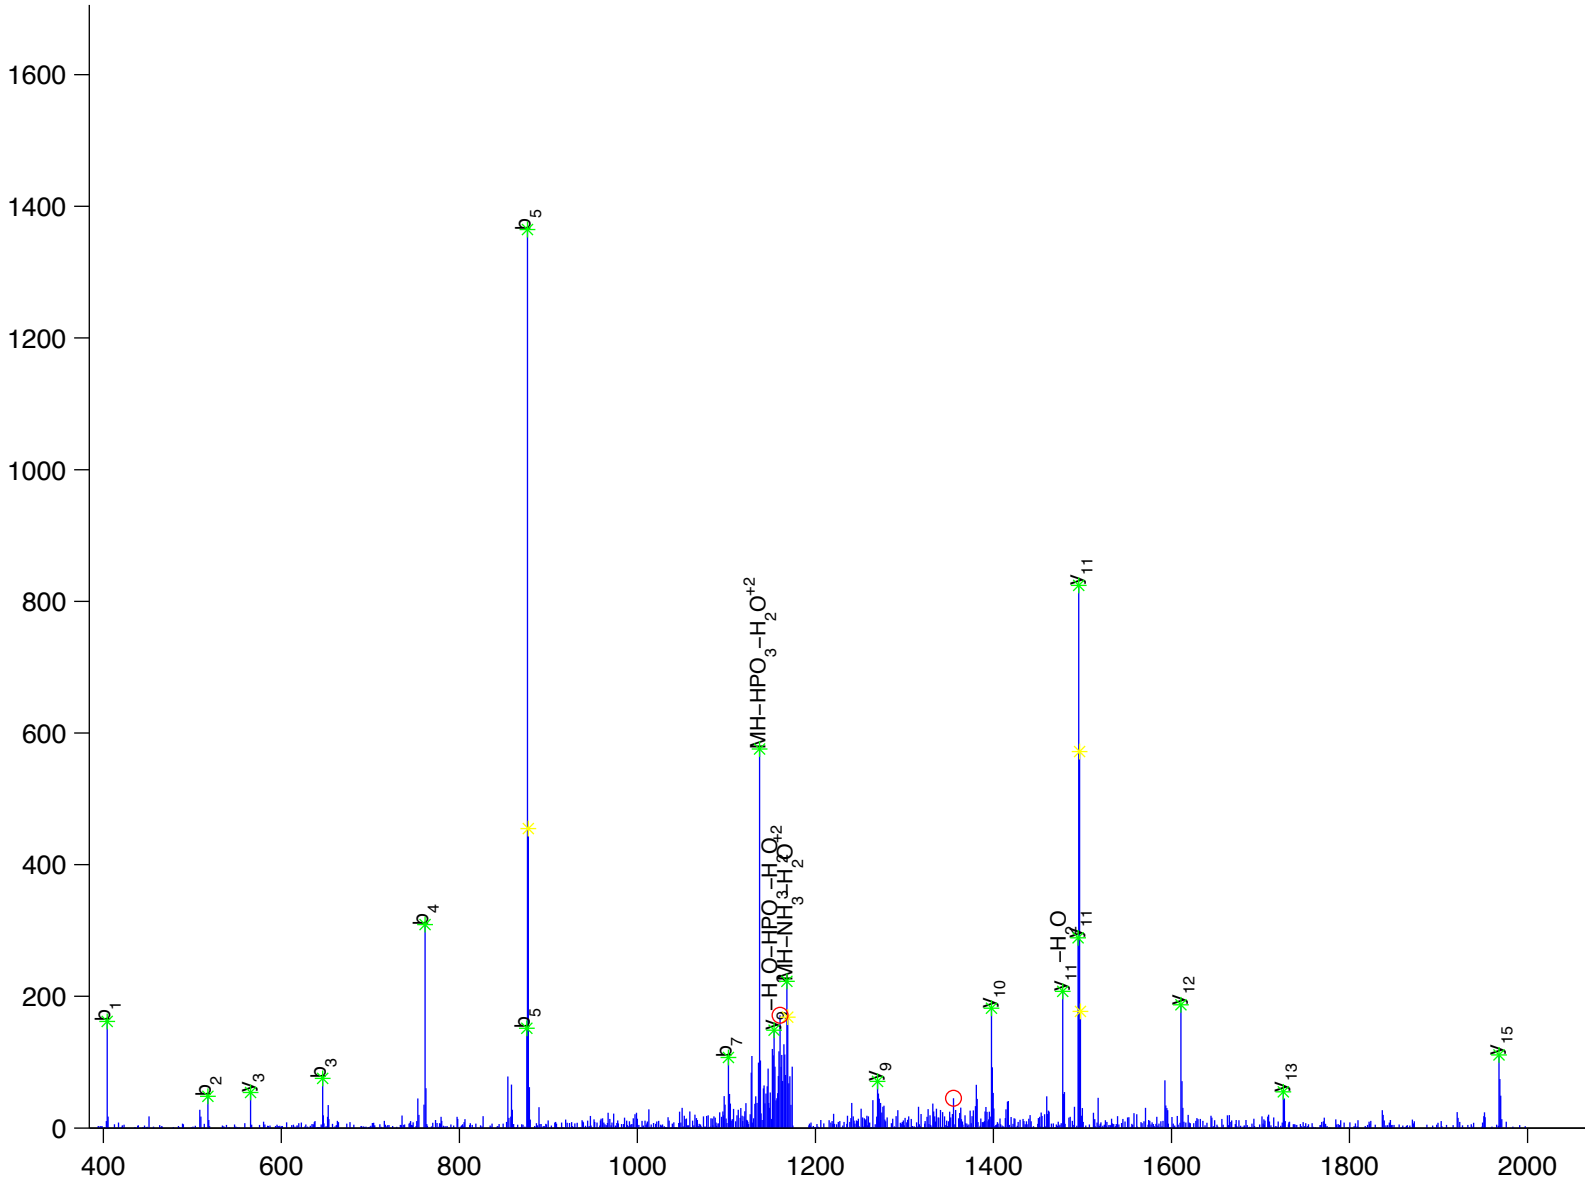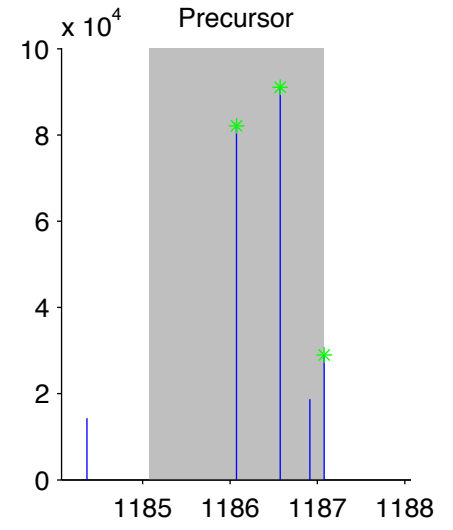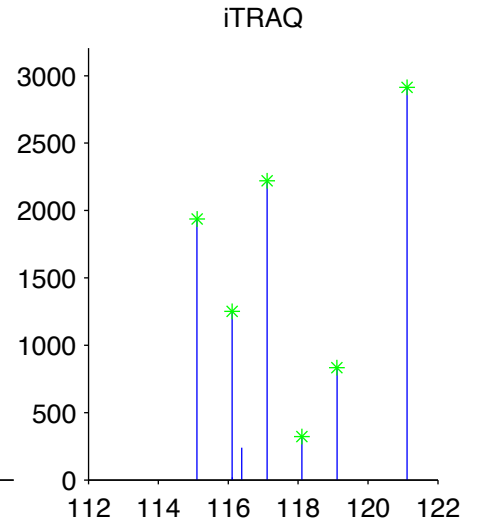

A [ L [ M [ D [ E [ E [ D [ M [ D [ D [ V [ V [ D [ A [ D [ E [ y [ L [ I [ P [ Q [ Q [ G [ F [ F [ S [ S [ P [ S [ T [ S ] R

epidermal growth factor receptor isoform a [Homo sapiens]

Charge State: +3

Scan Number: 10062

File Name: HJ050711\_GBMxeno\_bio1\_E\_HANNAH.raw

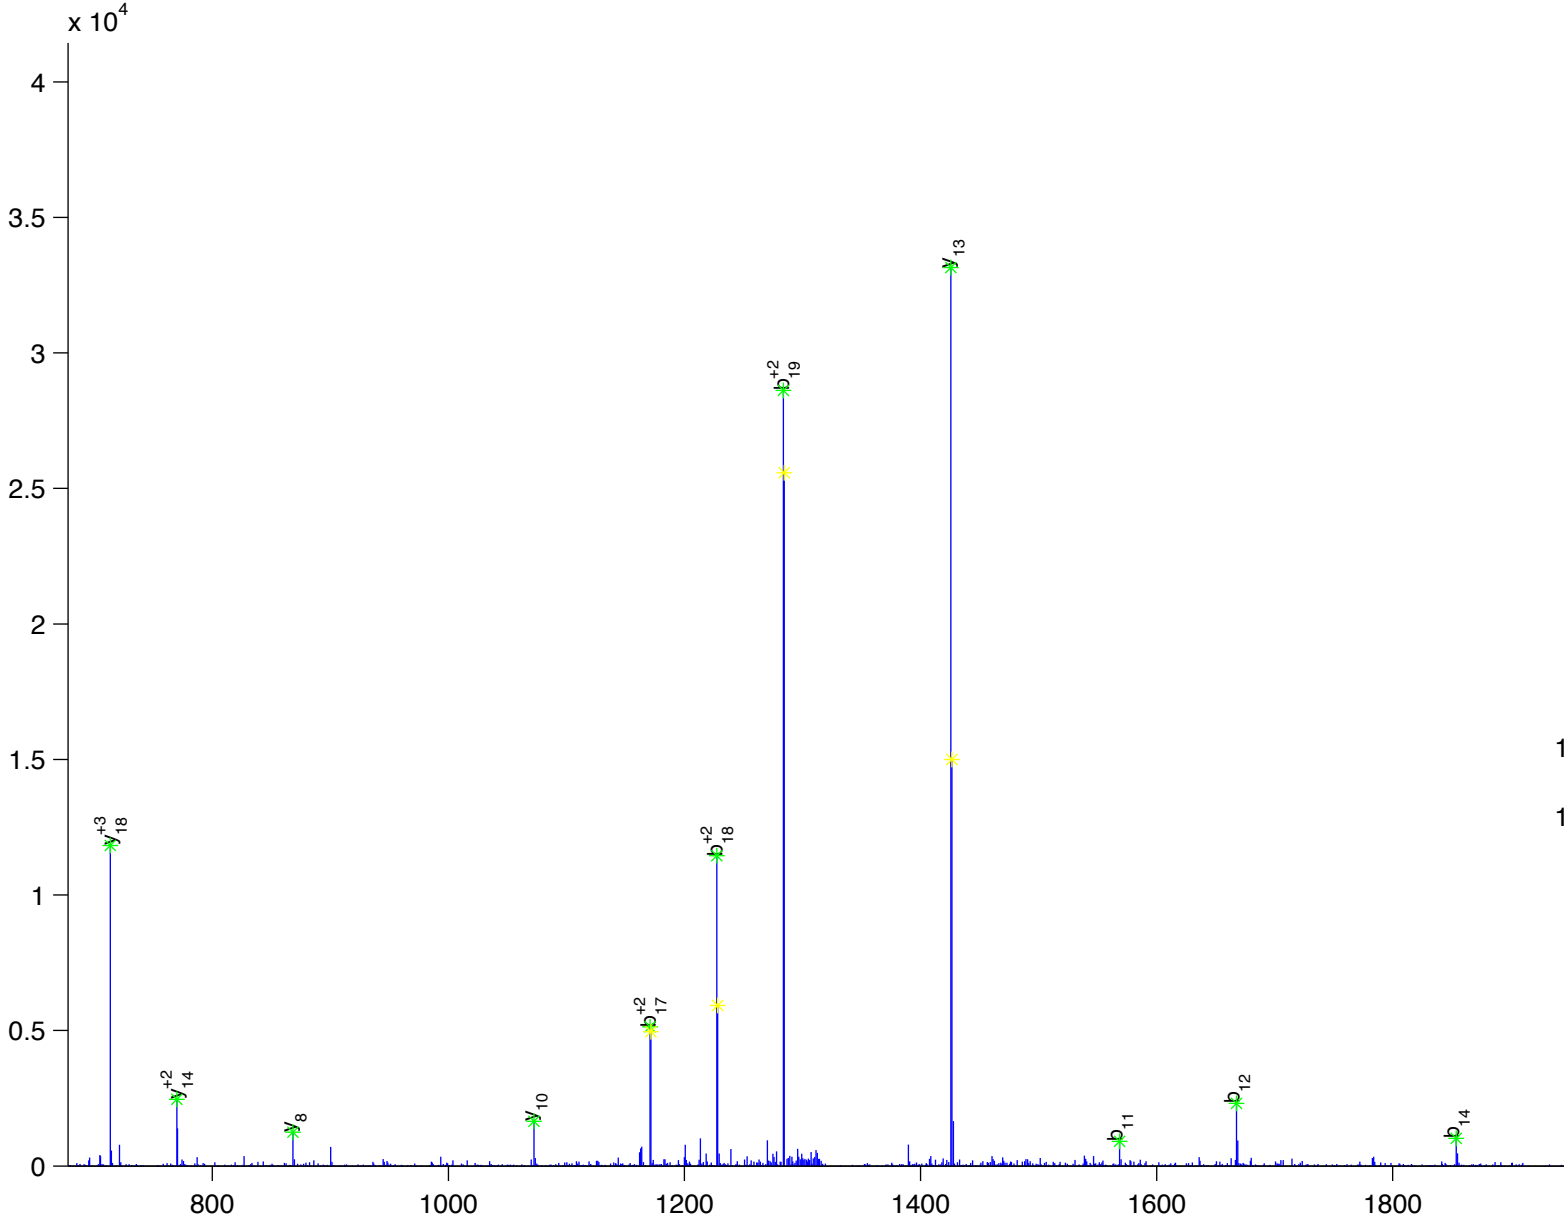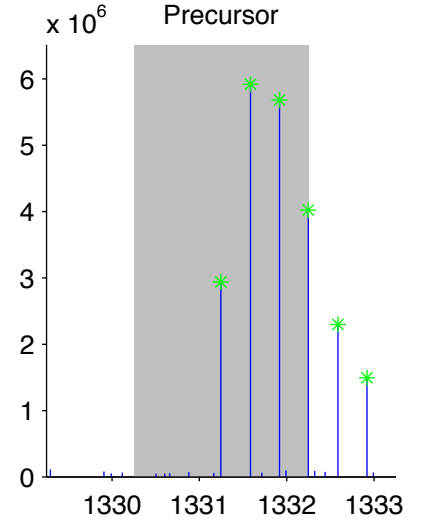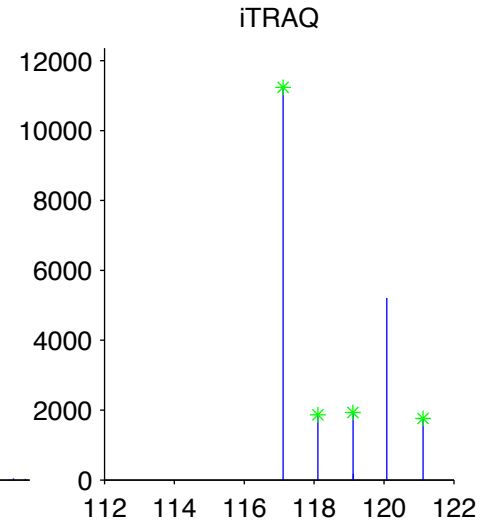

A L M D E E D M D D V V D A D E y L I P Q Q G F F S S P S T S R

epidermal growth factor receptor isoform a [Homo sapiens]

Charge State: +3

Scan Number: 10072

File Name: HJ050711\_GBMxeno\_bio1\_E\_HANNAH.raw

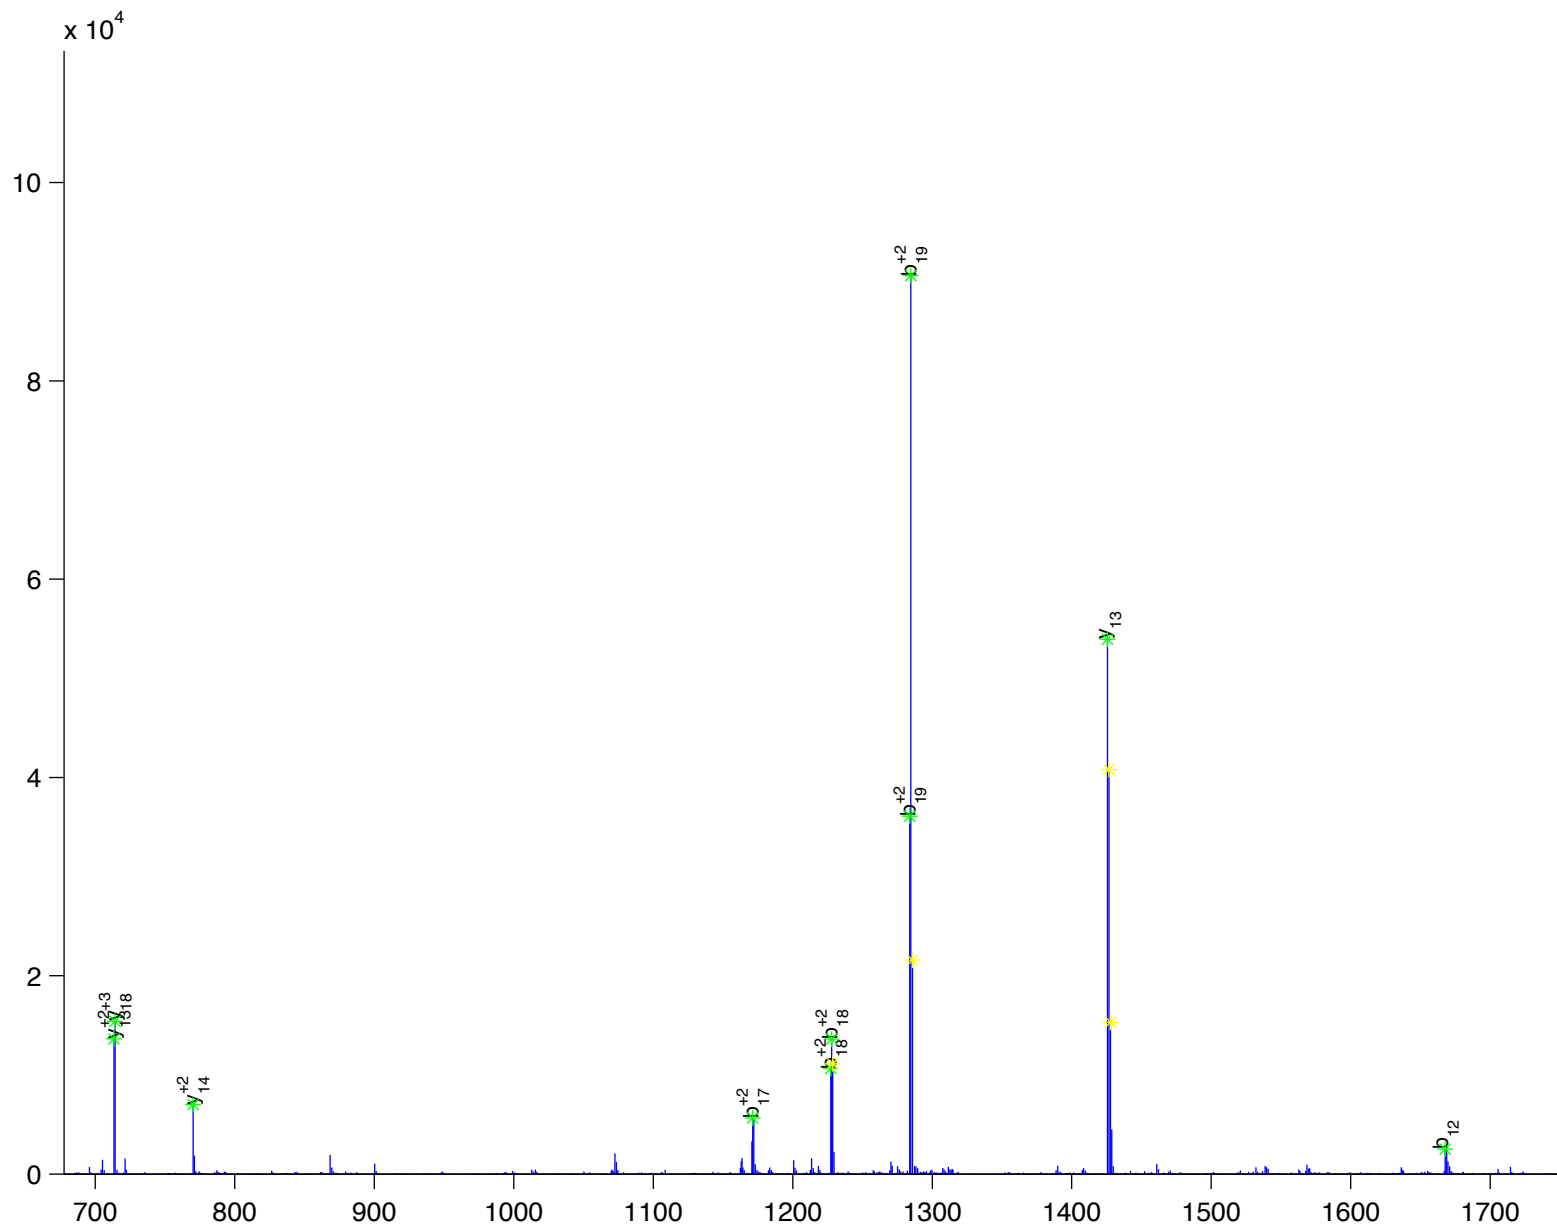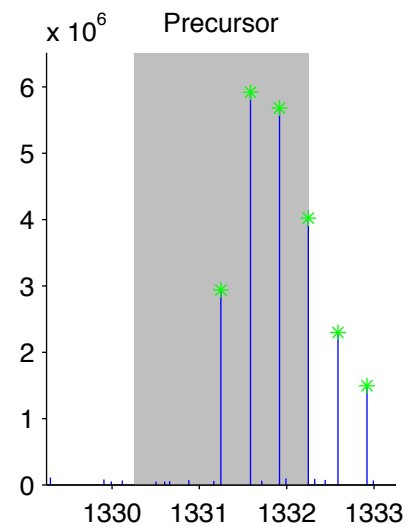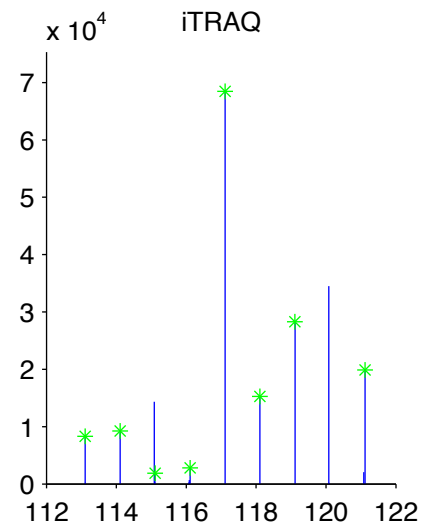



G[S]T[A]E[N]A[E]y[L]R

epidermal growth factor receptor isoform a [Homo sapiens]

Charge State: +2

Scan Number: 3547

File Name: HJ050711\_GBMxeno\_bio1\_E\_HANNAH.raw

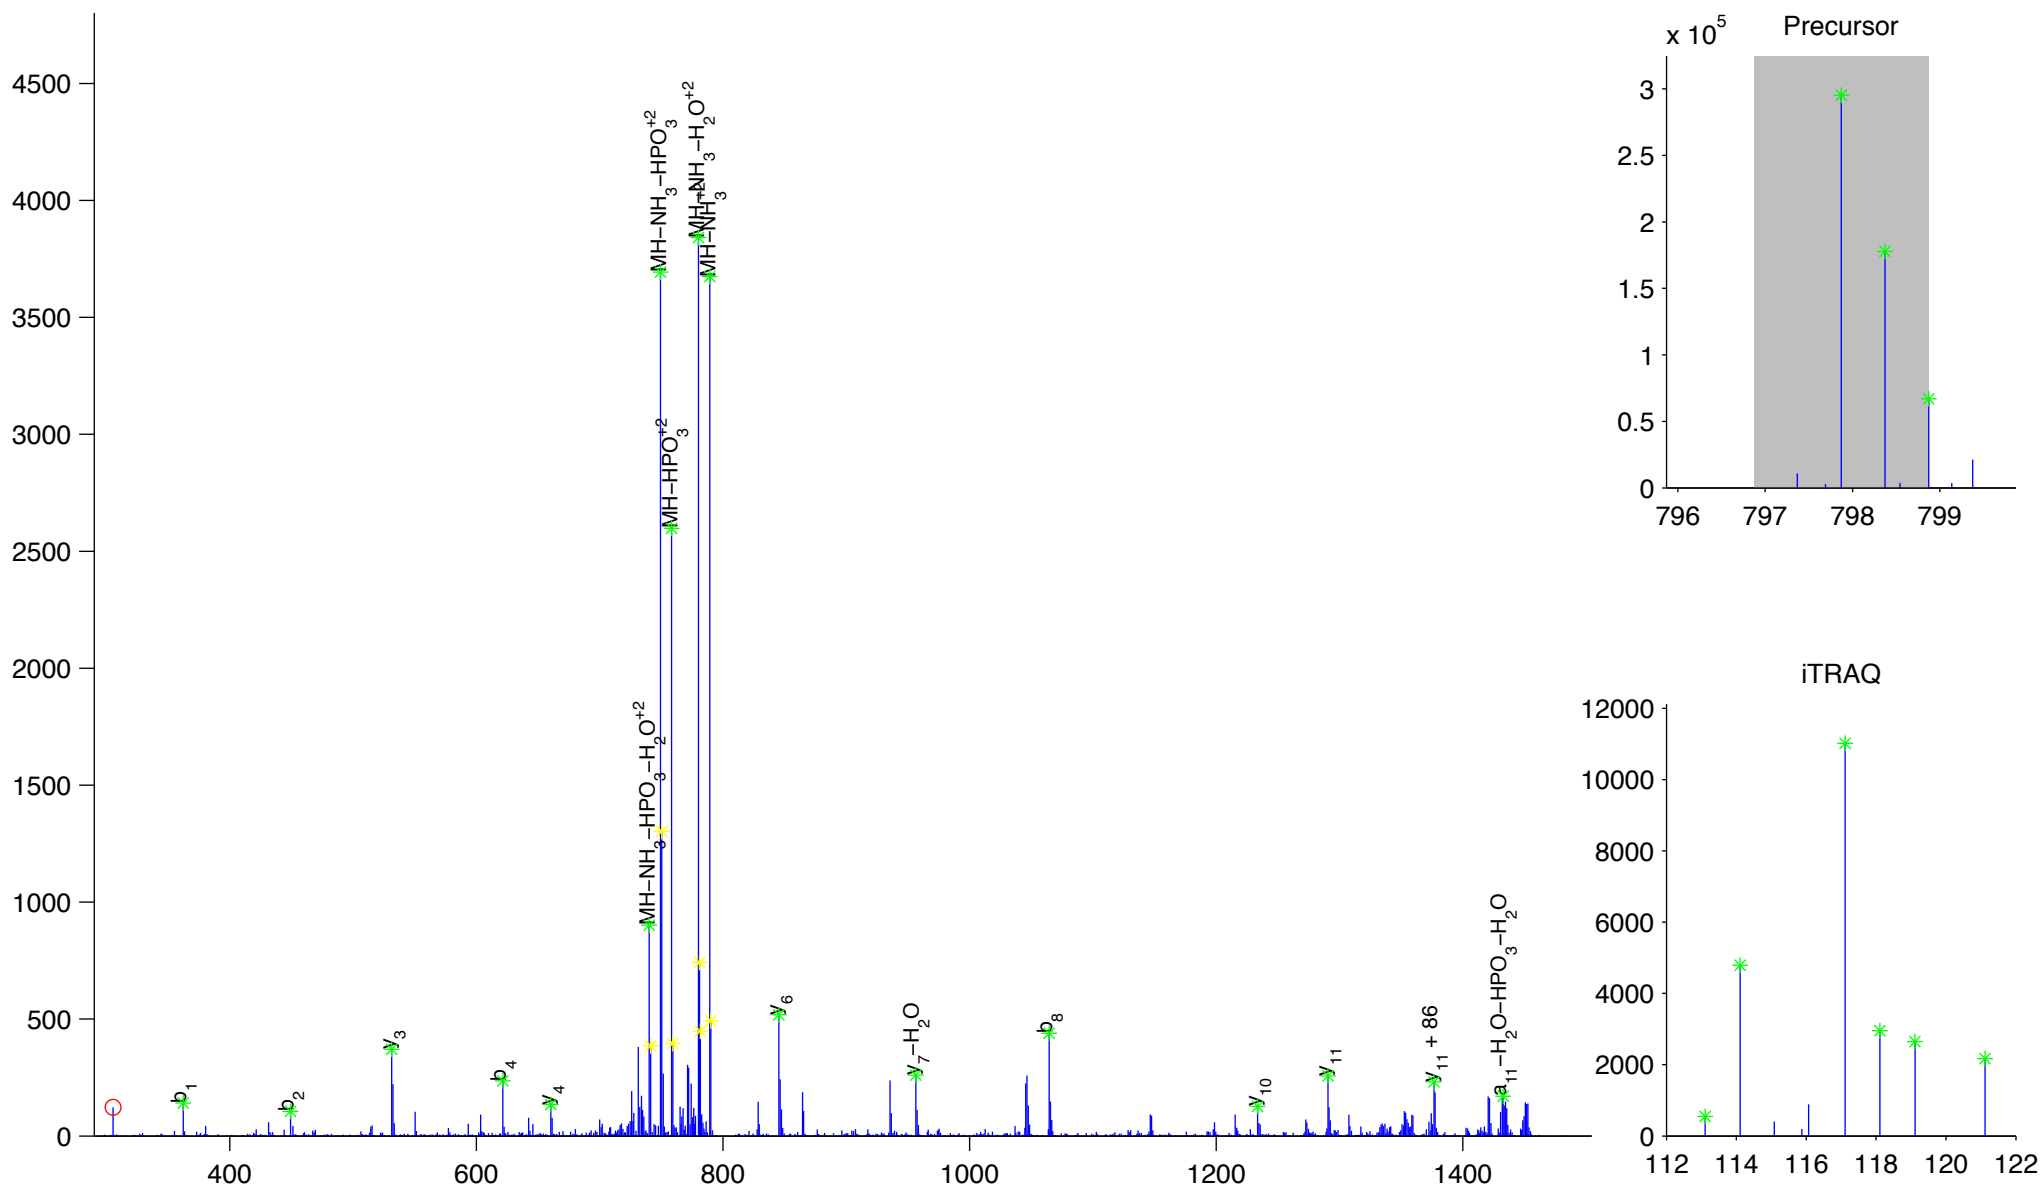

G [ S ] T [ A ] E [ N ] A [ E ] y [ L ] R

epidermal growth factor receptor isoform a [Homo sapiens]

Charge State: +2

Scan Number: 3846

File Name: HJ050711\_GBMxeno\_bio1\_E\_HANNAH.raw

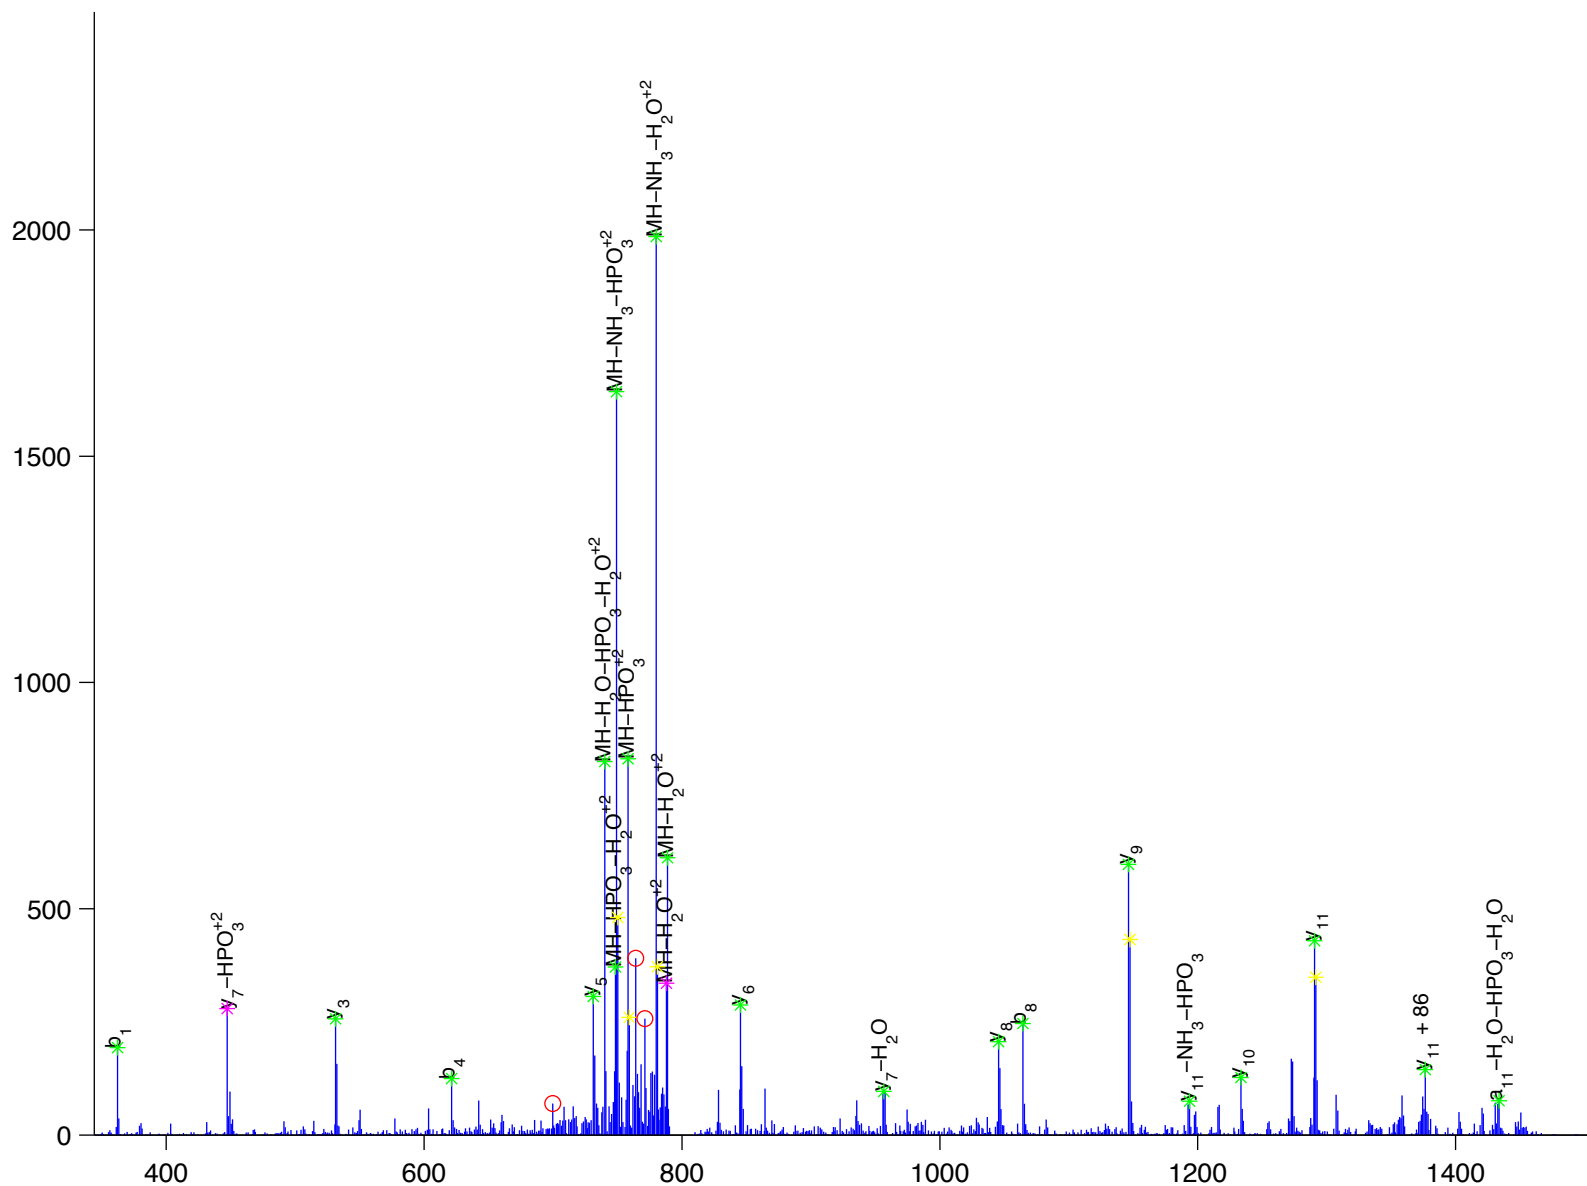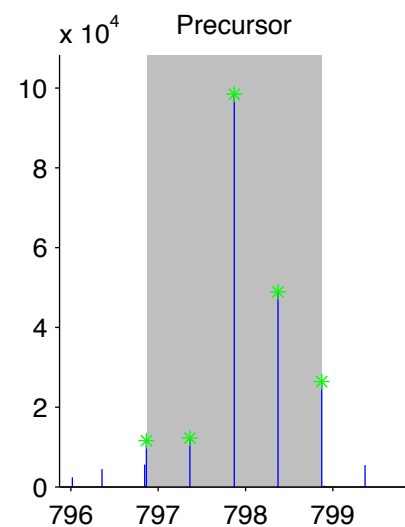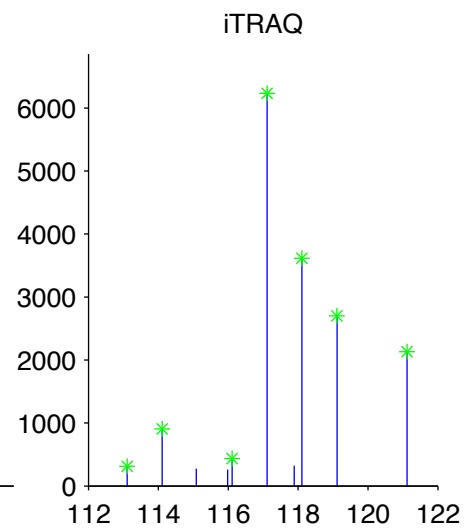

G[S]T[A]E[N]A[E]y[L]R

epidermal growth factor receptor isoform a [Homo sapiens]

Charge State: +2

Scan Number: 3930

File Name: HJ050711\_GBMxeno\_bio1\_E\_HANNAH.raw

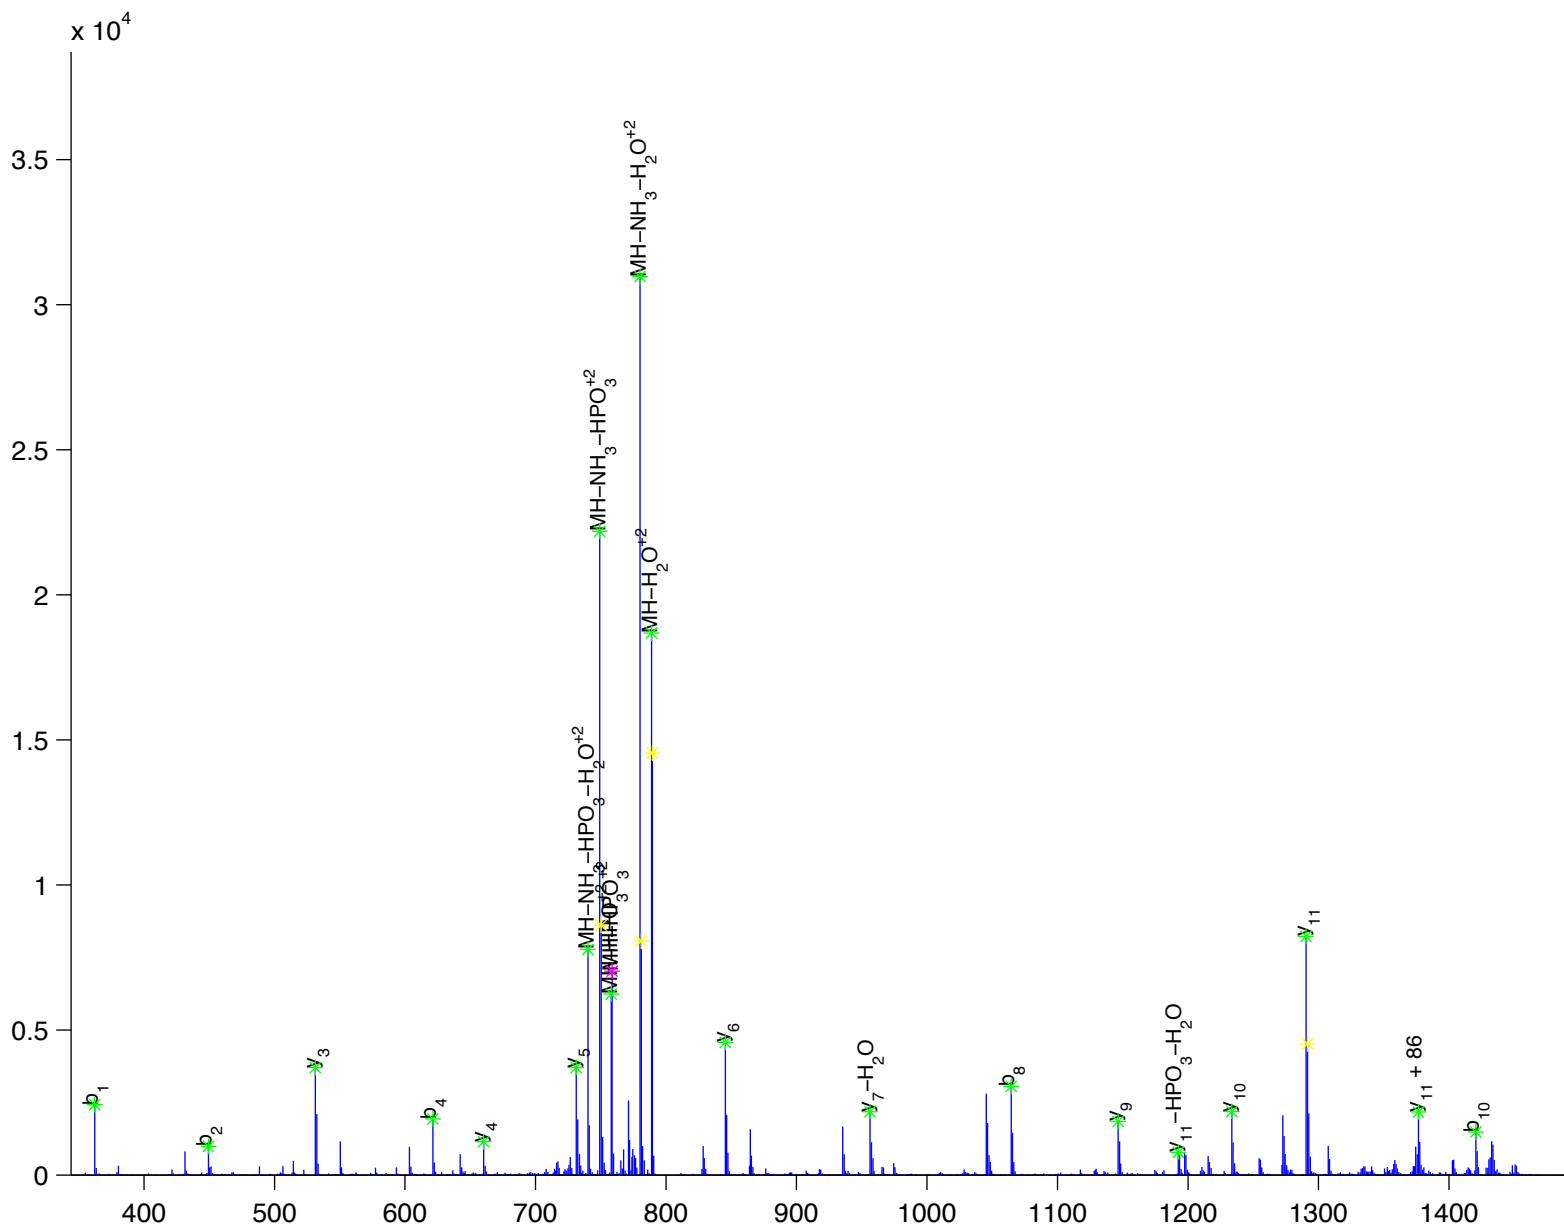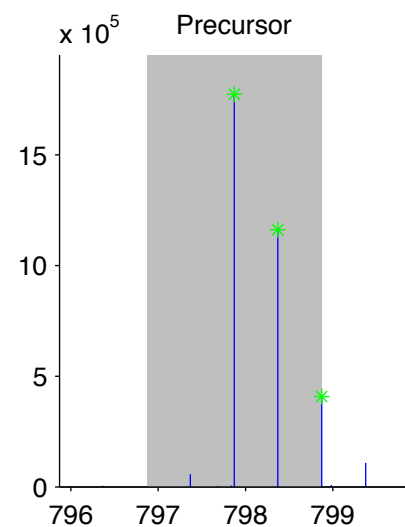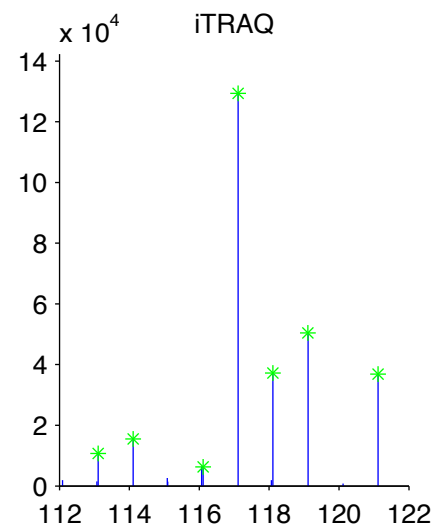

G[S]T[A]E[N]A[E]y[L]R

epidermal growth factor receptor isoform a [Homo sapiens]

Charge State: +3

Scan Number: 3951

File Name: HJ050711\_GBMxeno\_bio1\_E\_HANNAH.raw

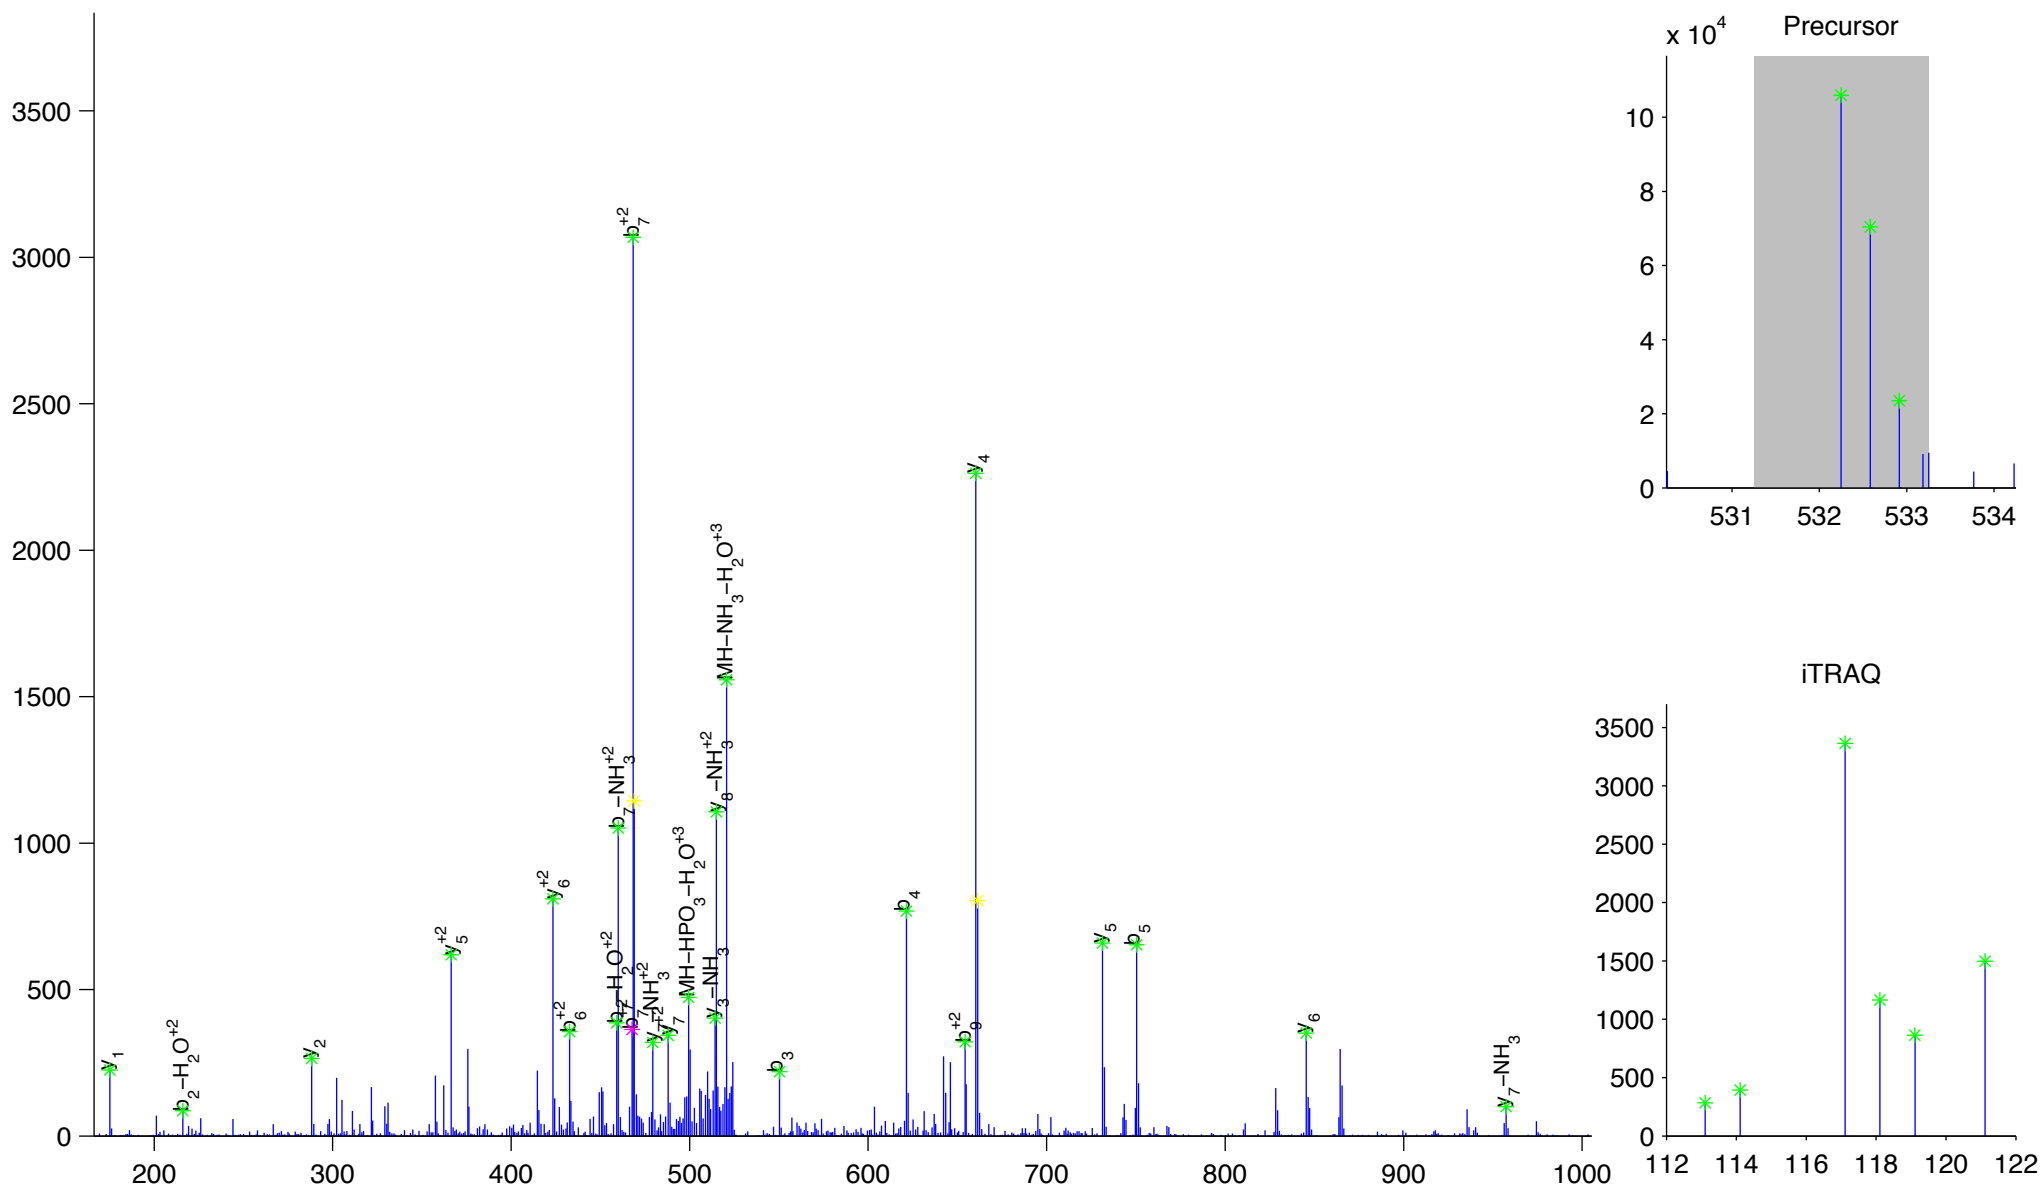

G [ S ] T [ A ] E [ N ] A [ E ] y [ L ] R

epidermal growth factor receptor isoform a [Homo sapiens]

Charge State: +2

Scan Number: 4035

File Name: HJ050711\_GBMxeno\_bio1\_E\_HANNAH.raw

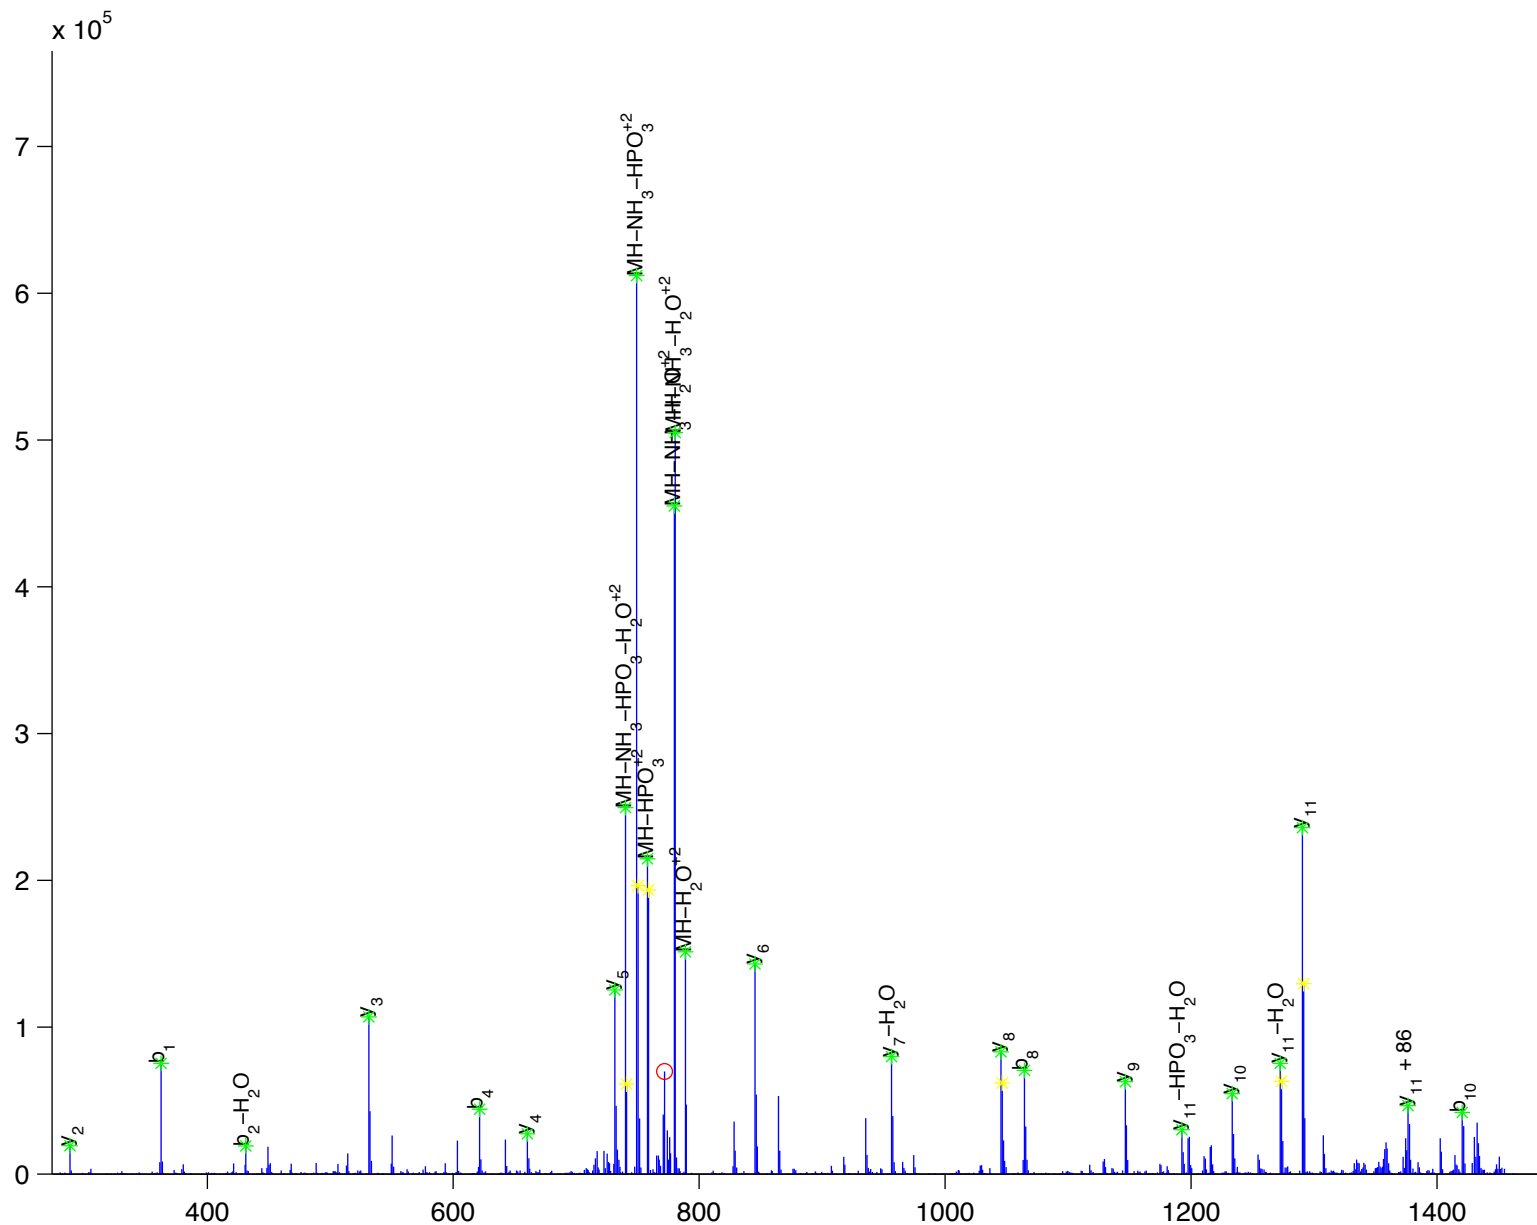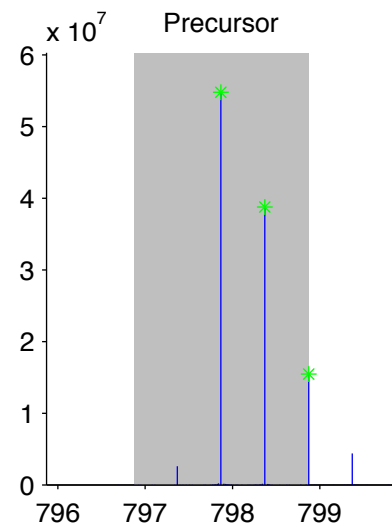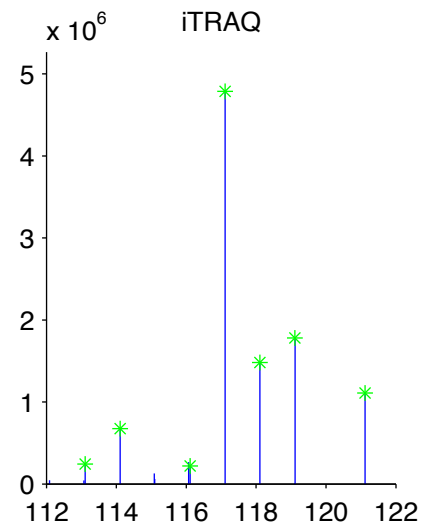

G[S]T[A]E[N]A[E]y[L]R

epidermal growth factor receptor isoform a [Homo sapiens]

Charge State: +2

Scan Number: 4119

File Name: HJ050711\_GBMxeno\_bio1\_E\_HANNAH.raw

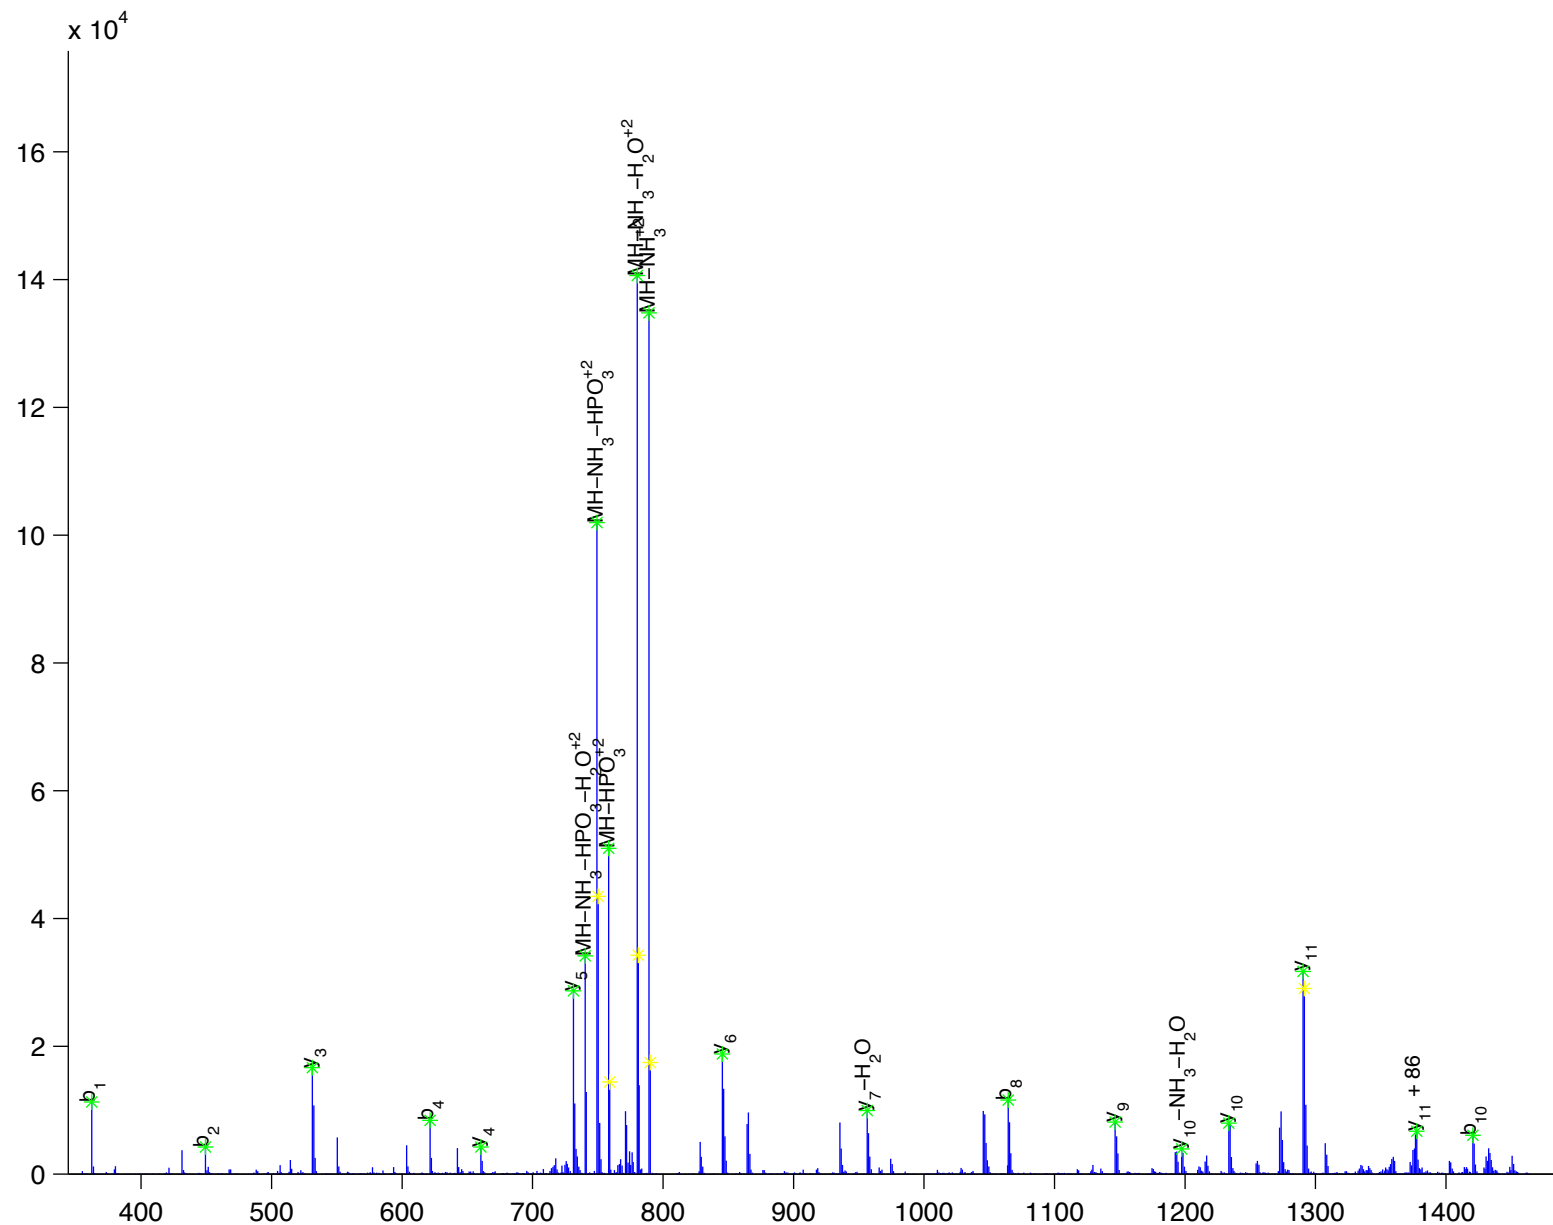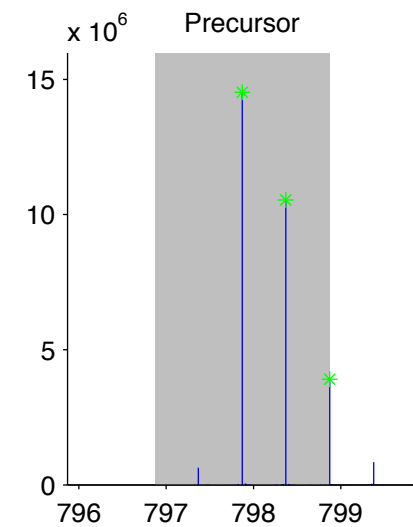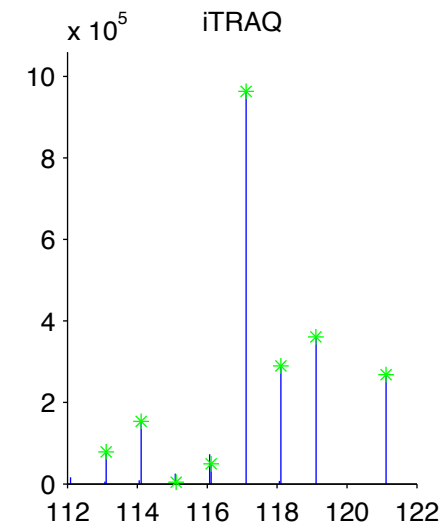

G  
[S  
[T  
[A  
[E  
[N  
[A  
[E  
y  
L  
R

epidermal growth factor receptor isoform a [Homo sapiens]

Charge State: +3

Scan Number: 4148

File Name: HJ050711\_GBMxeno\_bio1\_E\_HANNAH.raw

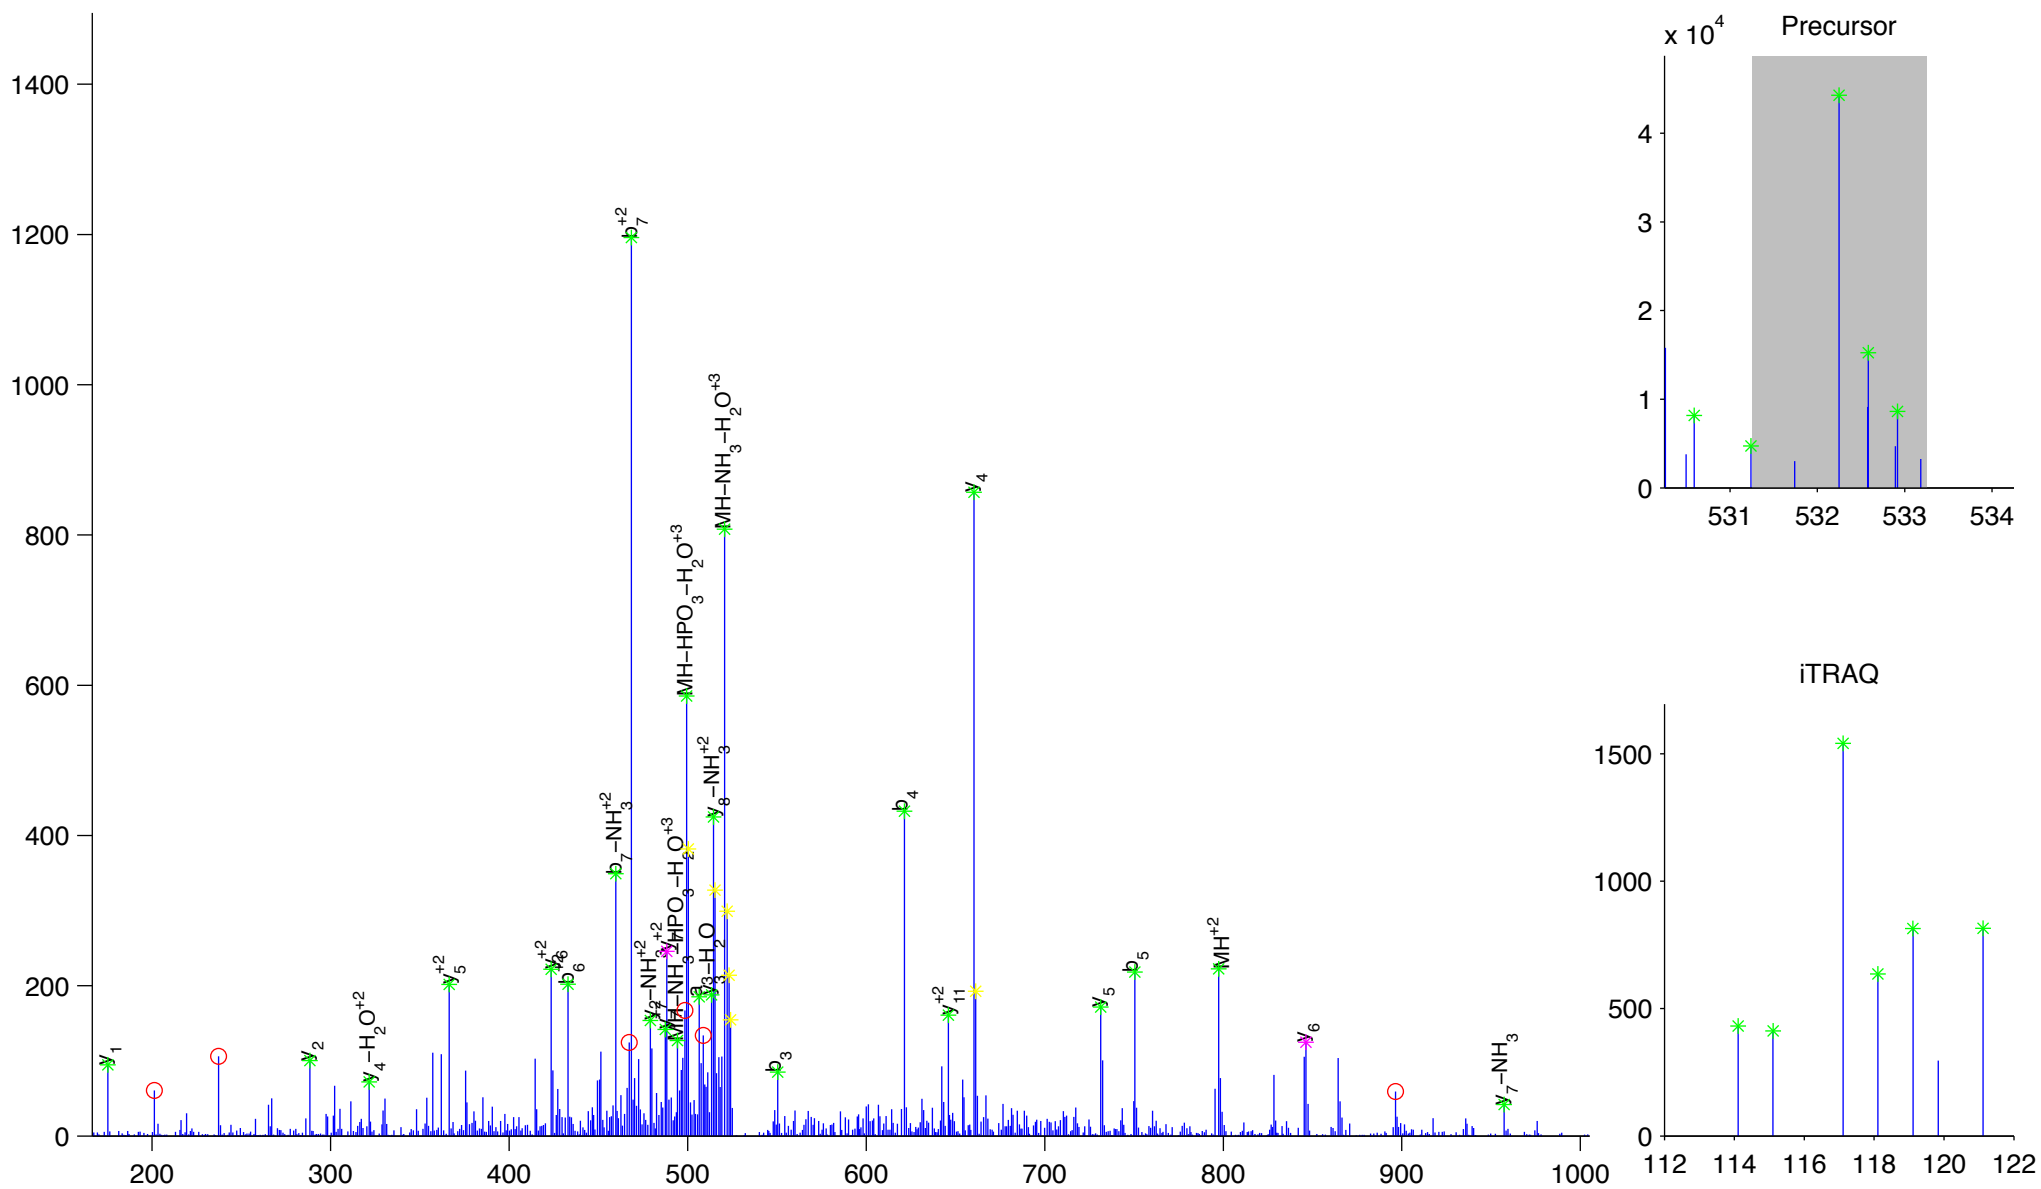

G [ S ] T [ A ] E [ N ] A [ E ] y [ L ] R

epidermal growth factor receptor isoform a [Homo sapiens]

Charge State: +2

Scan Number: 4203

File Name: HJ050711\_GBMxeno\_bio1\_E\_HANNAH.raw

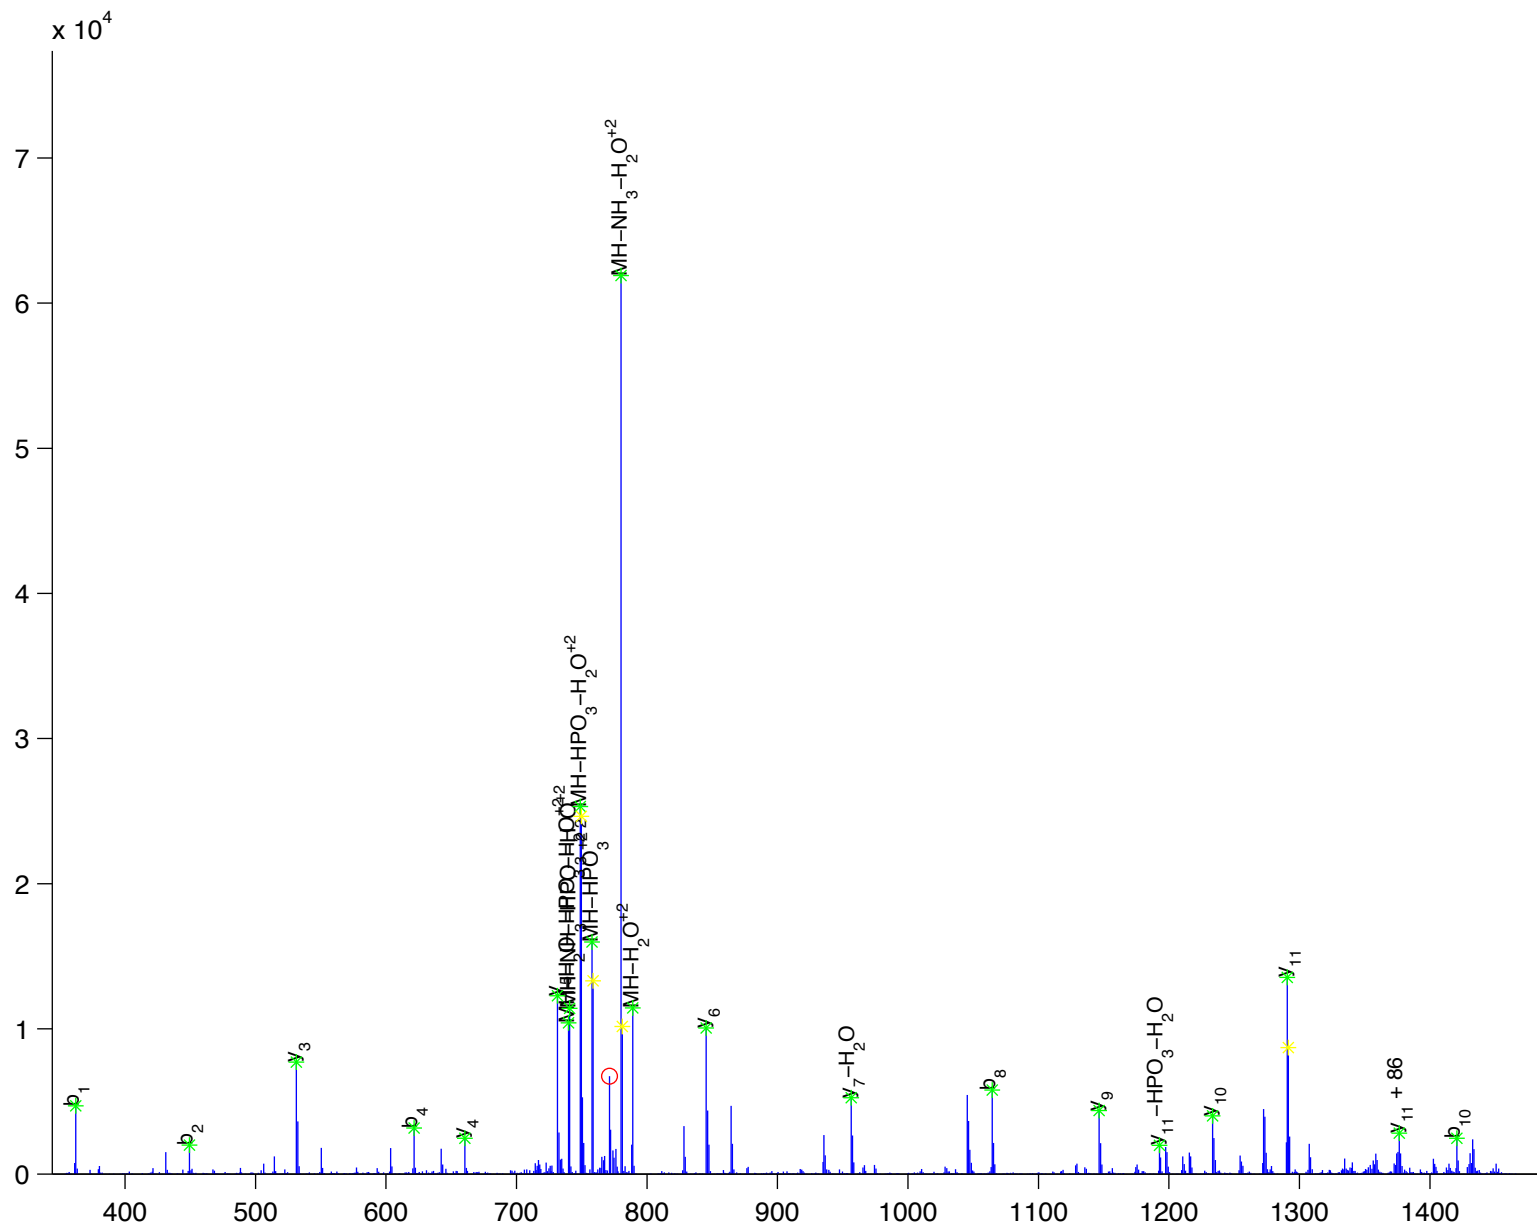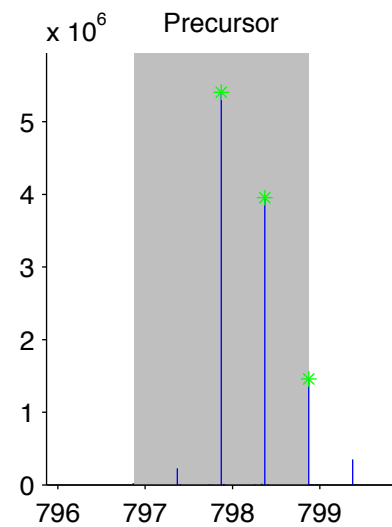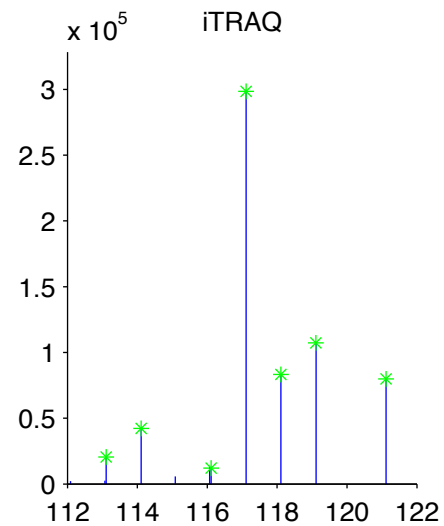



G[S]T[A]E[N]A[E]y[L]R

epidermal growth factor receptor isoform a [Homo sapiens]

Charge State: +2

Scan Number: 4289

File Name: HJ050711\_GBMxeno\_bio1\_E\_HANNAH.raw

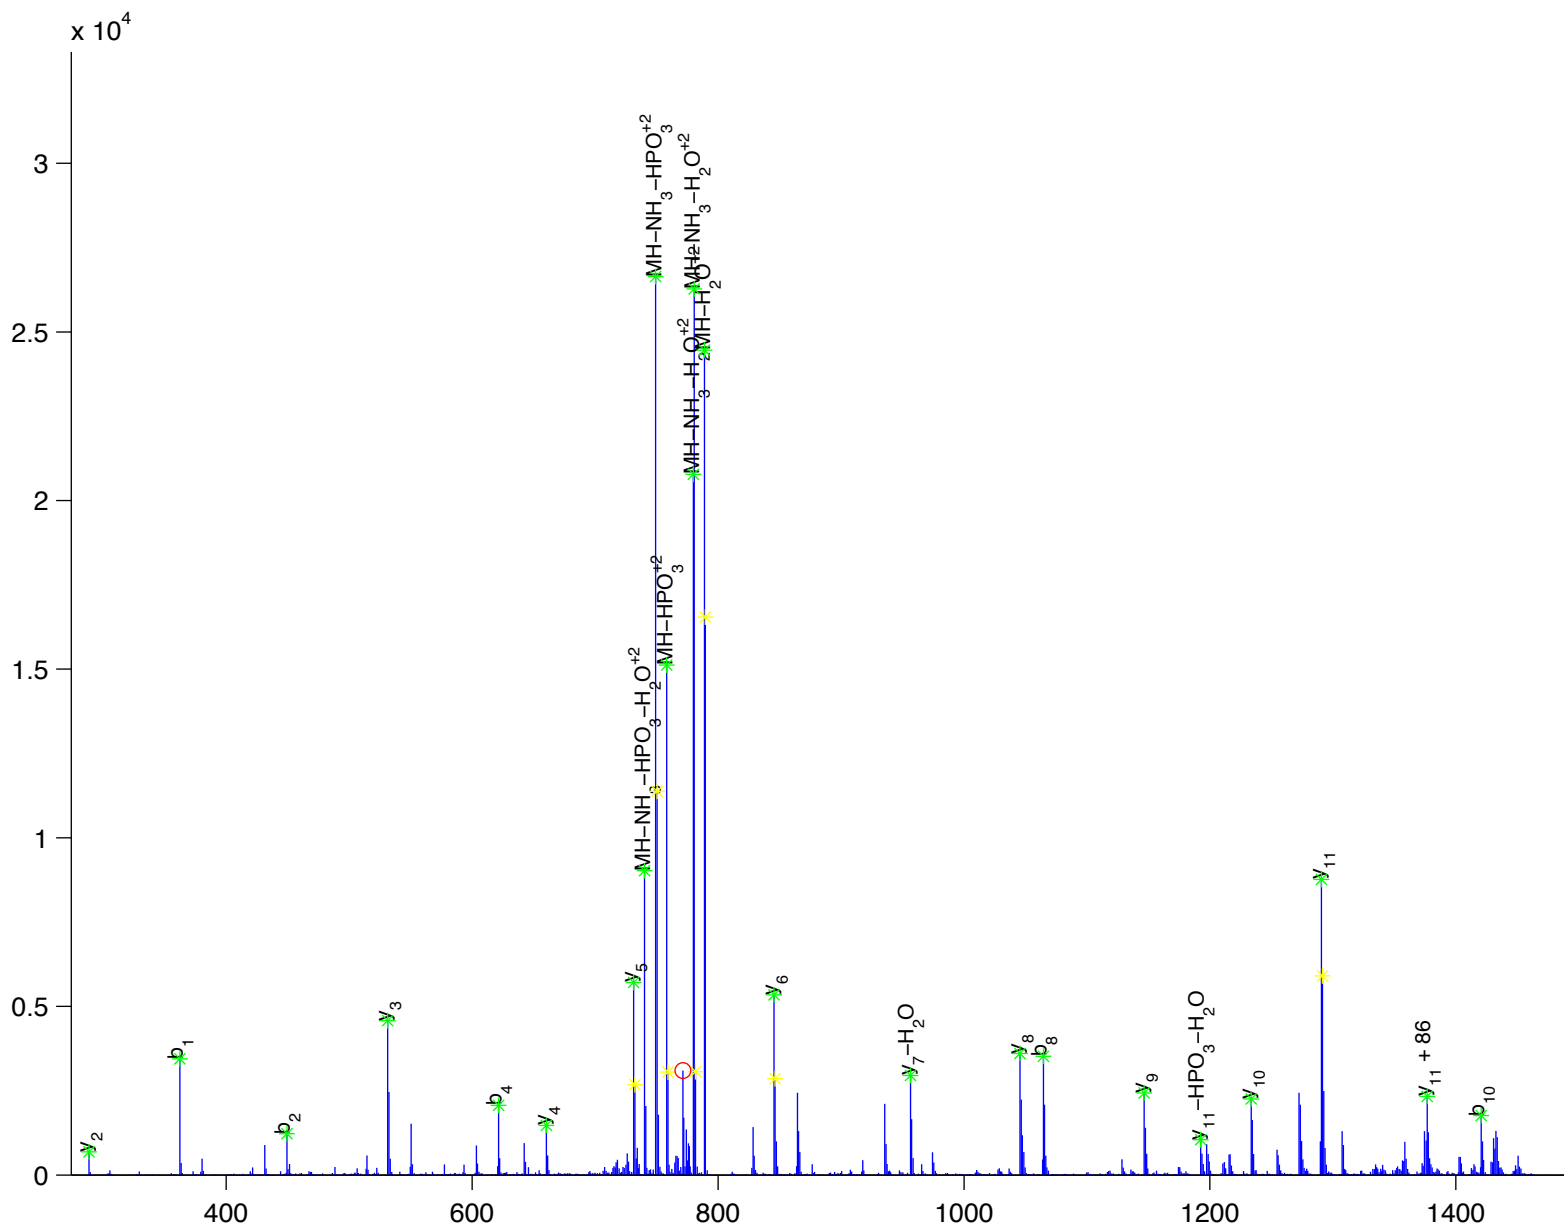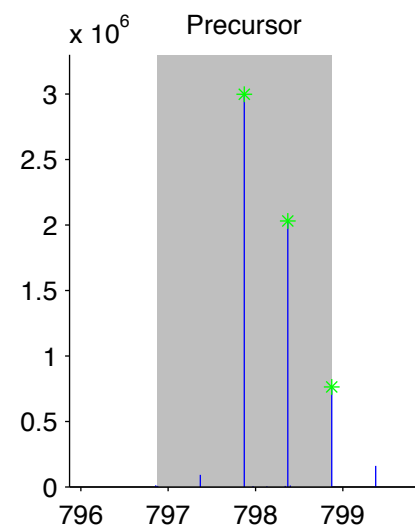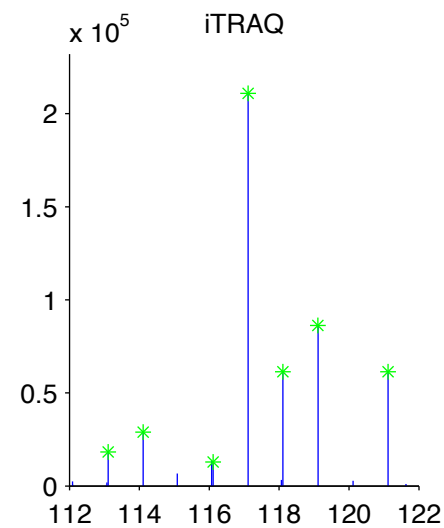

G[S]T[A]E[N]A[E]y[L]R

epidermal growth factor receptor isoform a [Homo sapiens]

Charge State: +2

Scan Number: 4371

File Name: HJ050711\_GBMxeno\_bio1\_E\_HANNAH.raw

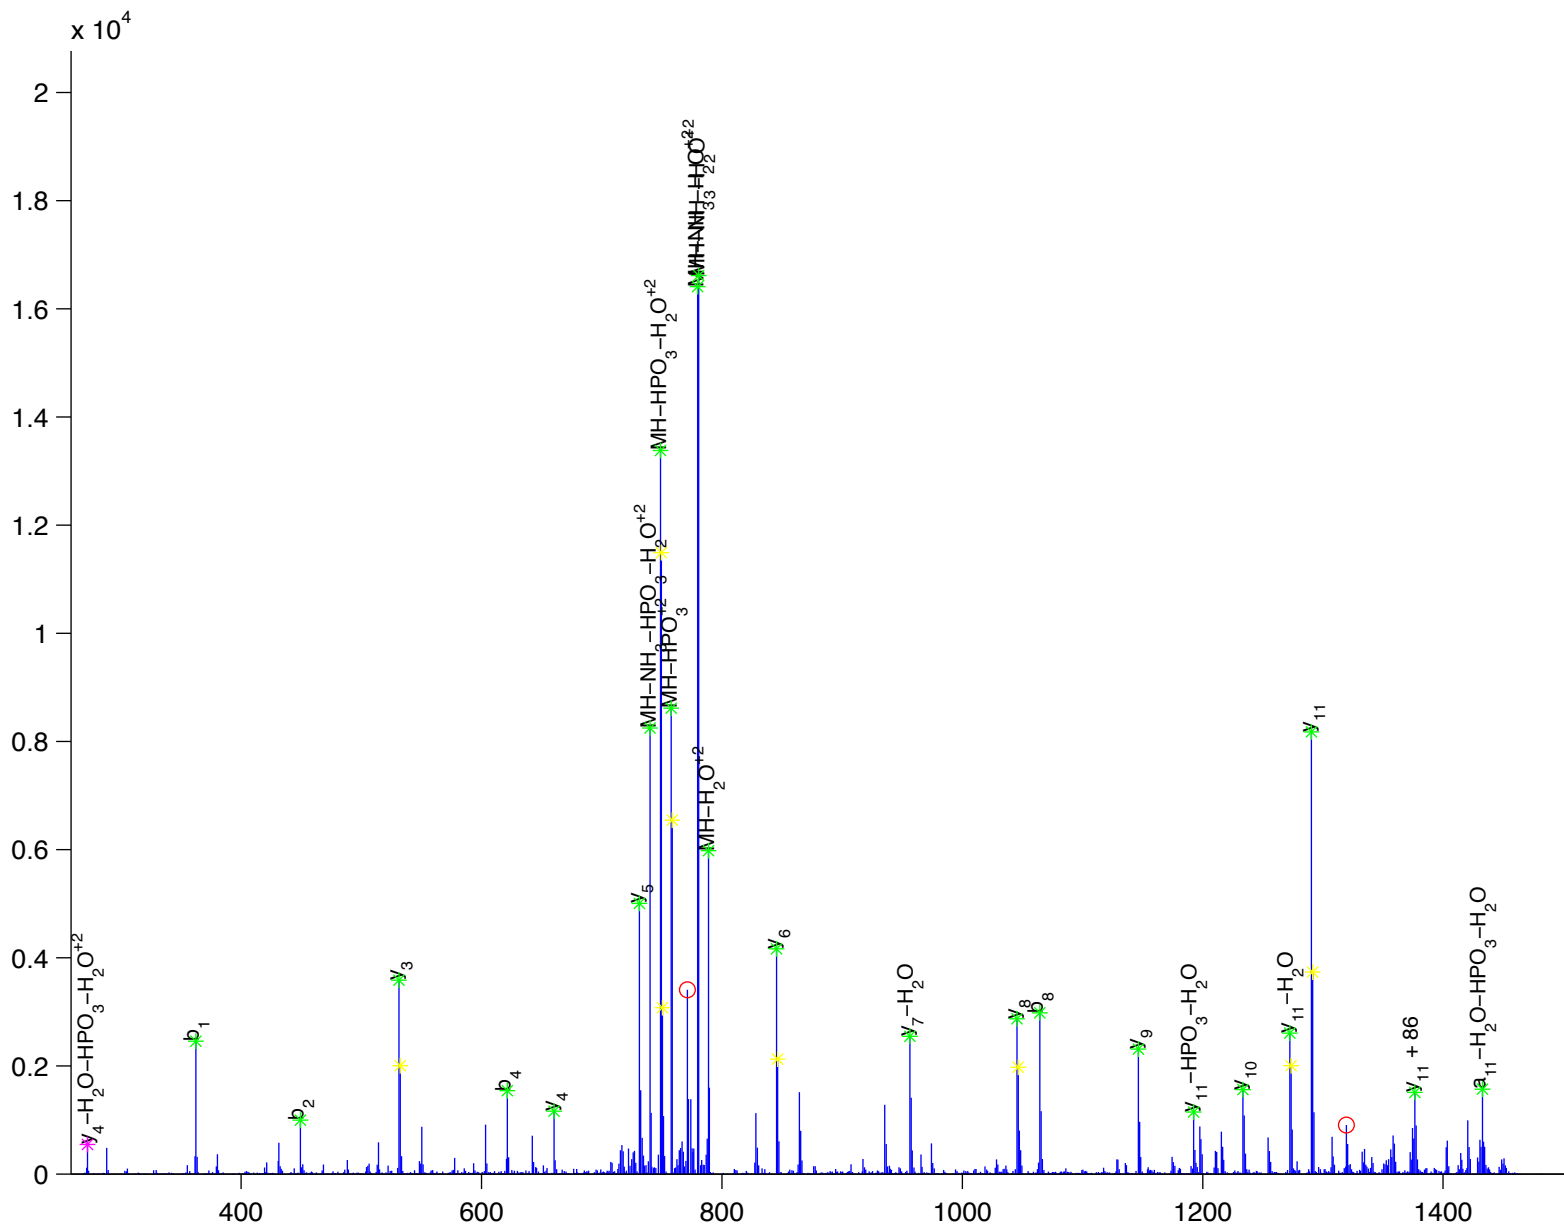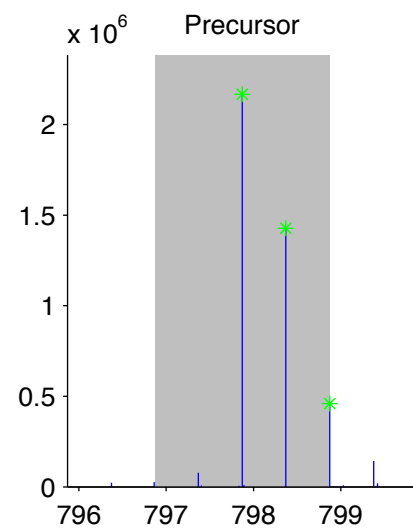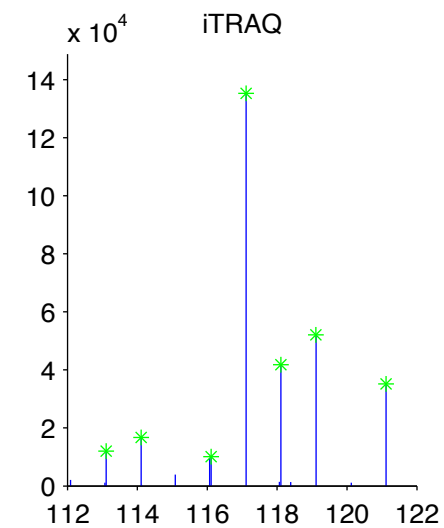

G [ S ] T [ A ] E [ N ] A [ E ] y [ L ] R

epidermal growth factor receptor isoform a [Homo sapiens]

Charge State: +2

Scan Number: 4461

File Name: HJ050711\_GBMxeno\_bio1\_E\_HANNAH.raw

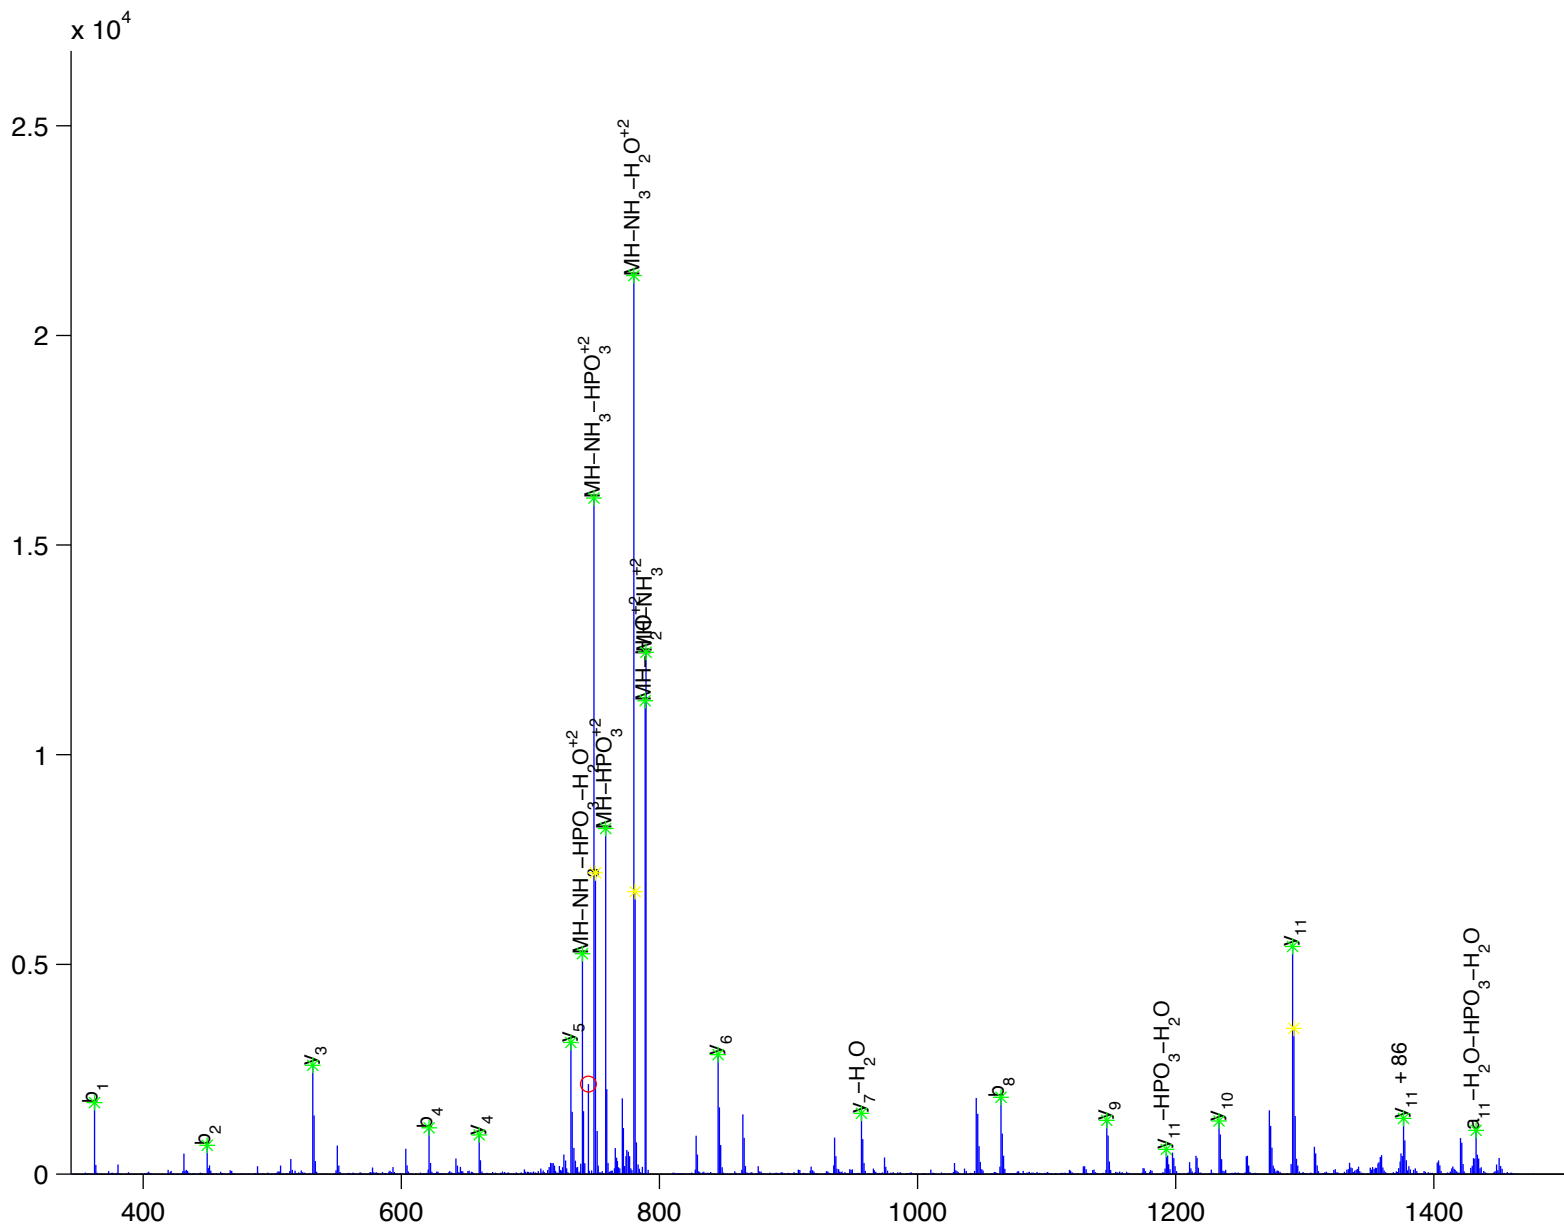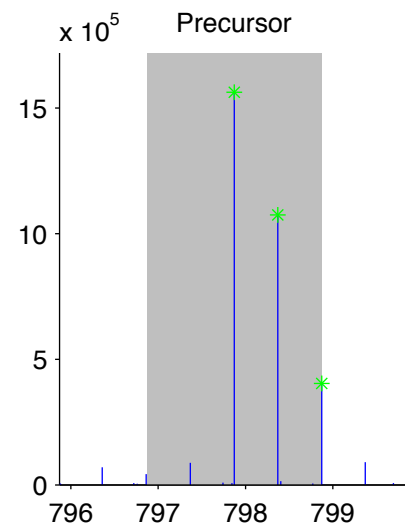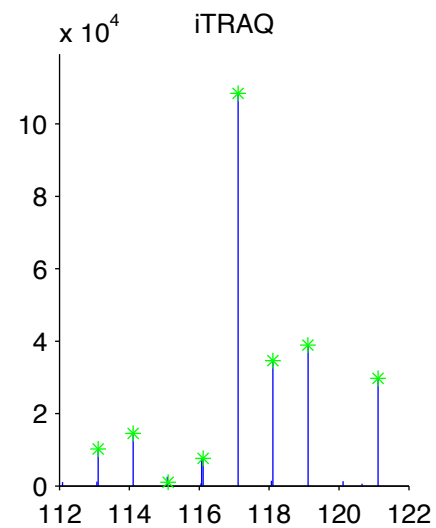

G[S]T[A]E[N]A[E]y[L]R

epidermal growth factor receptor isoform a [Homo sapiens]

Charge State: +2

Scan Number: 4707

File Name: HJ050711\_GBMxeno\_bio1\_E\_HANNAH.raw

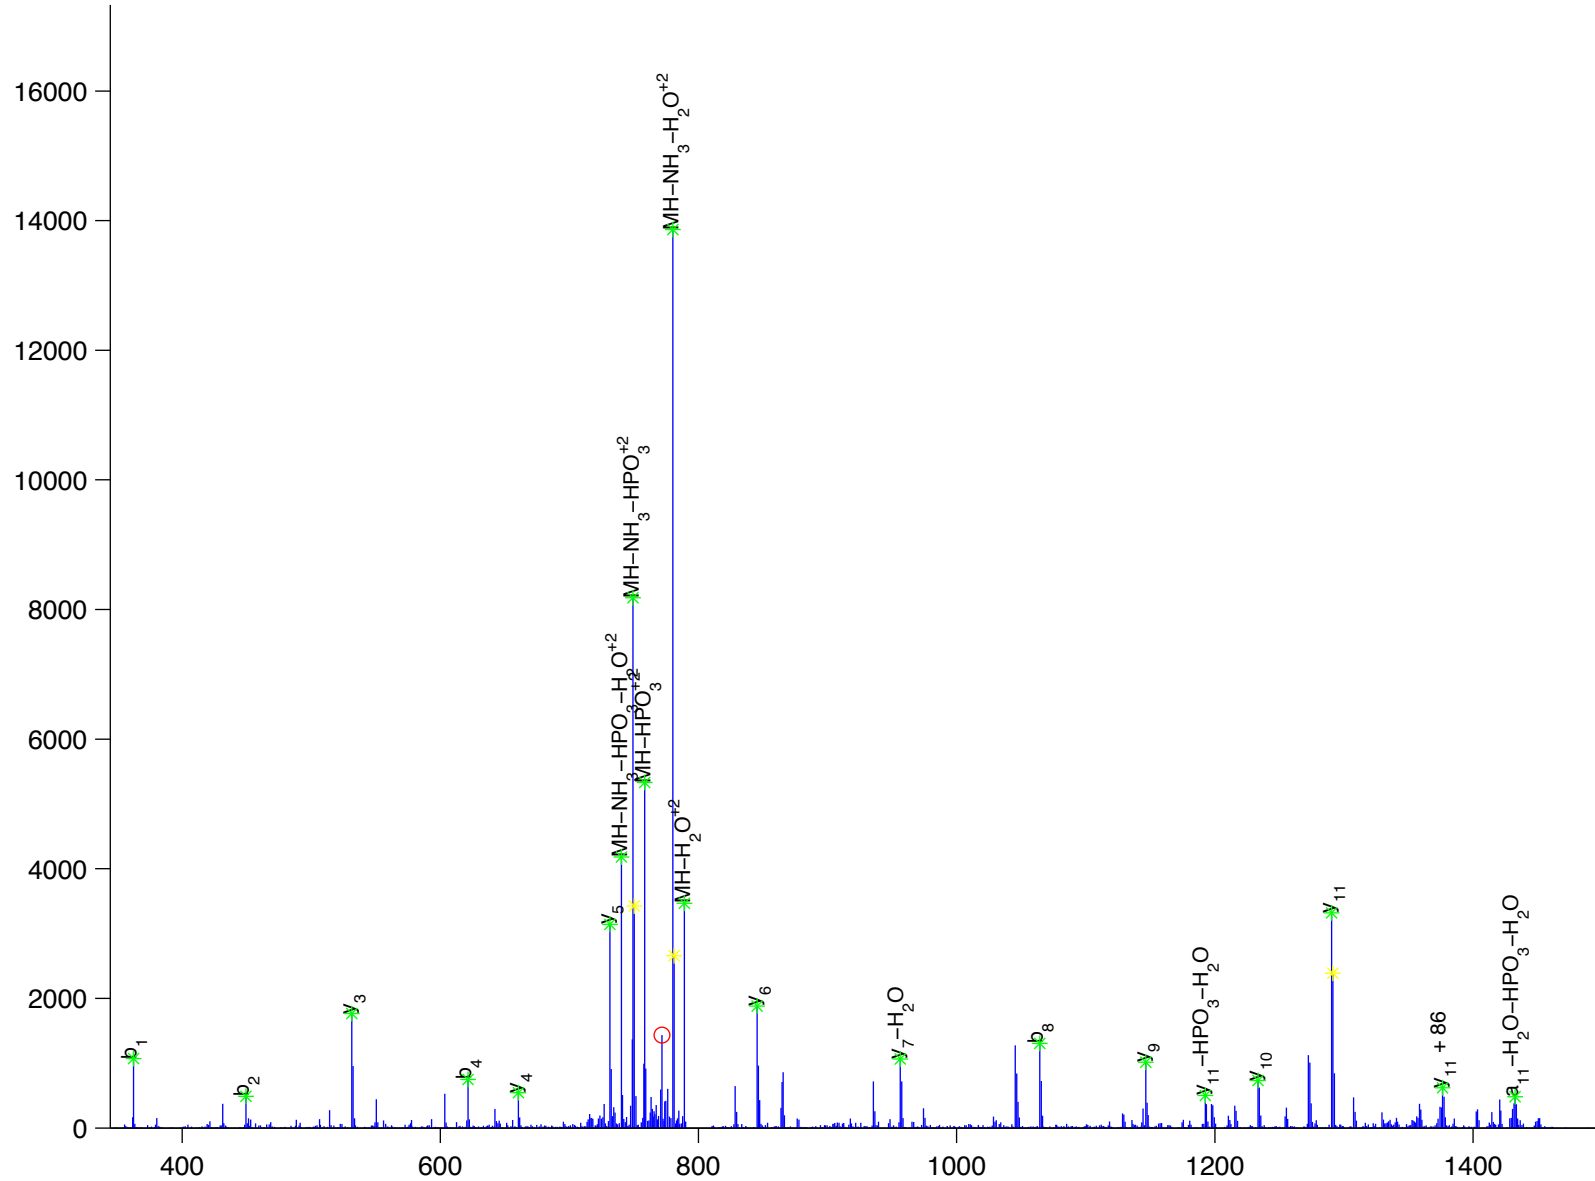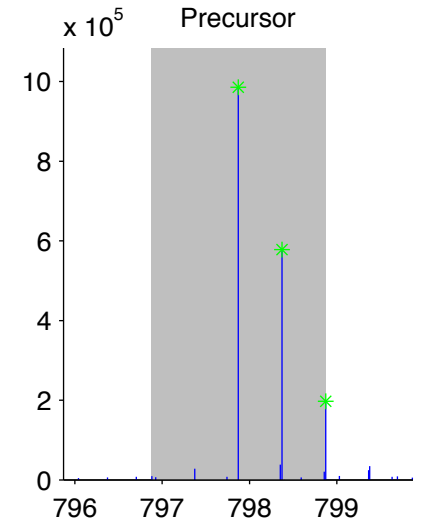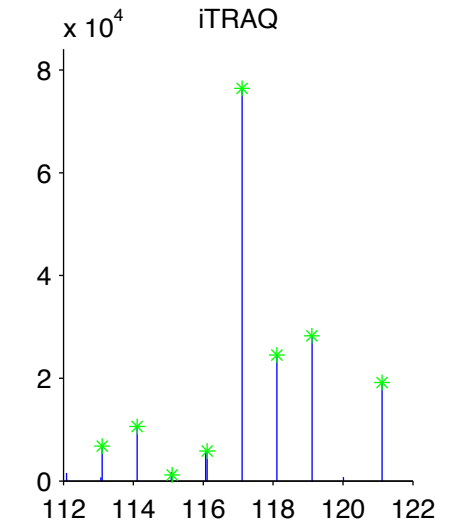

R [ P ] A [ G ] S [ V ] Q [ N ] P [ V ] y [ H ] N [ Q ] P [ L ] N [ P ] A [ P ] S [ R ]

epidermal growth factor receptor isoform a [Homo sapiens]

Charge State: +4

Scan Number: 4904

File Name: HJ050711\_GBMxeno\_bio1\_E\_HANNAH.raw

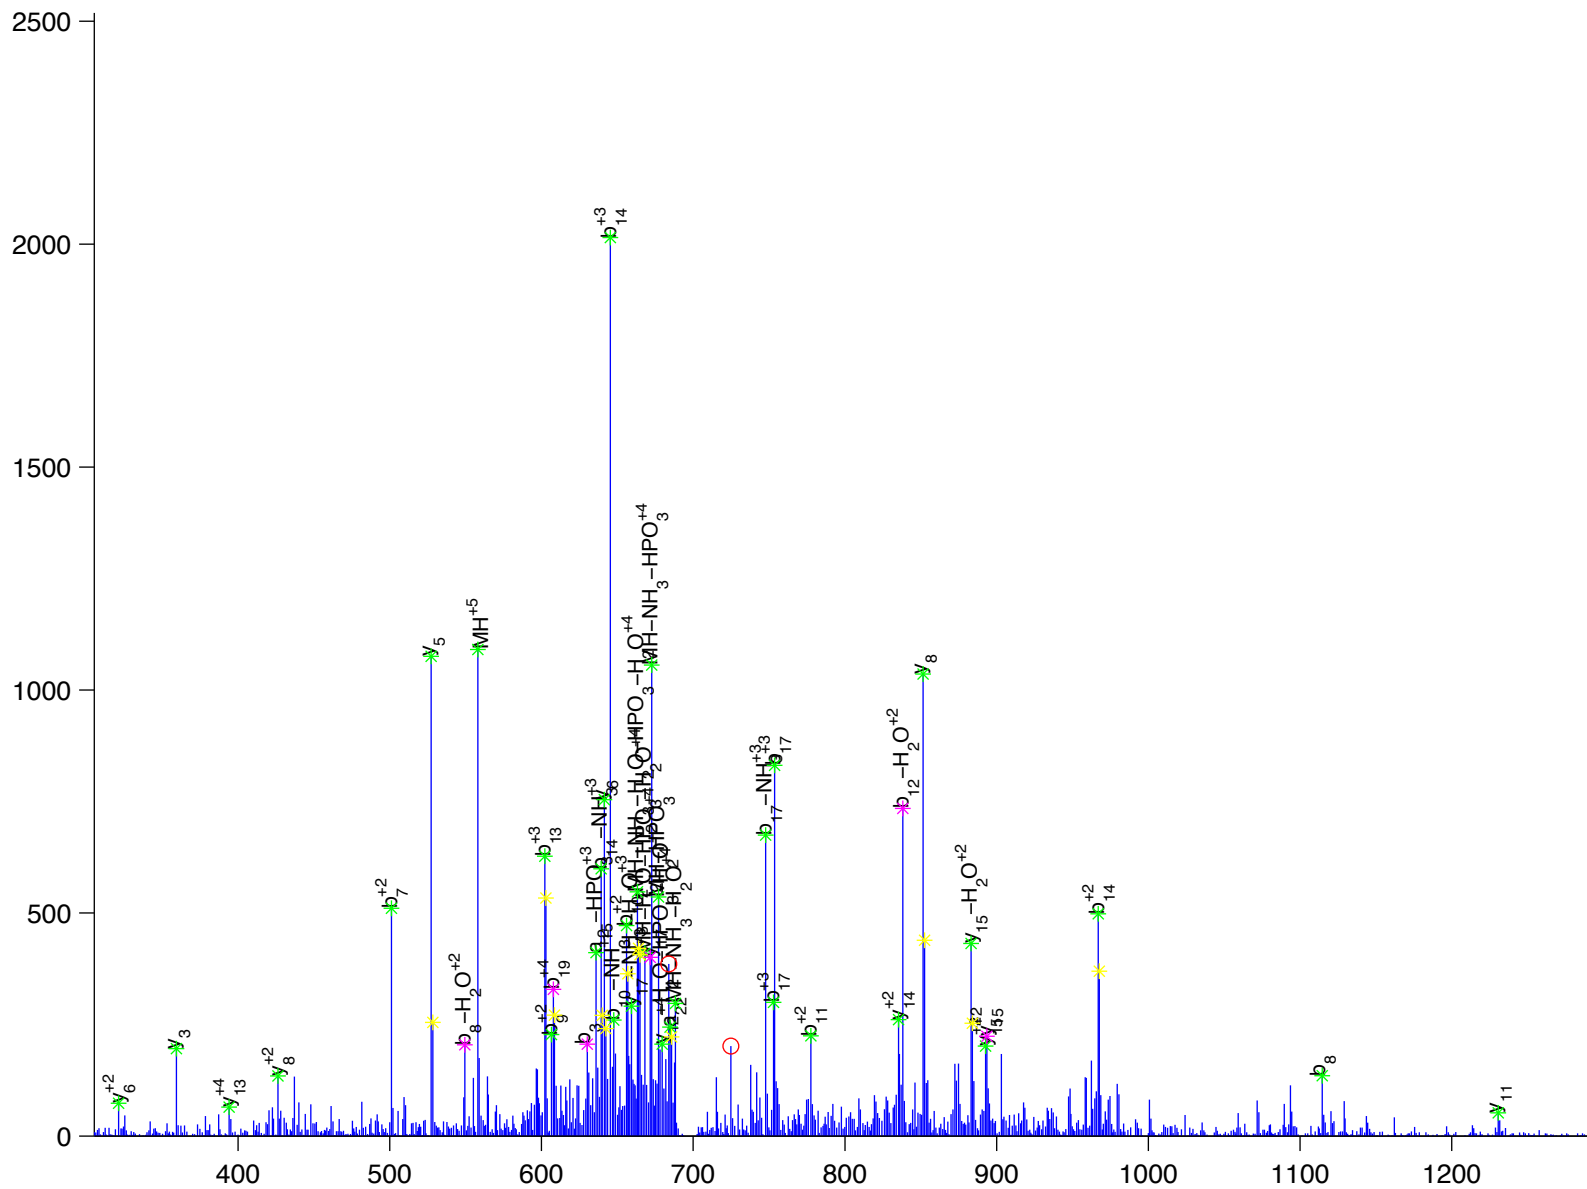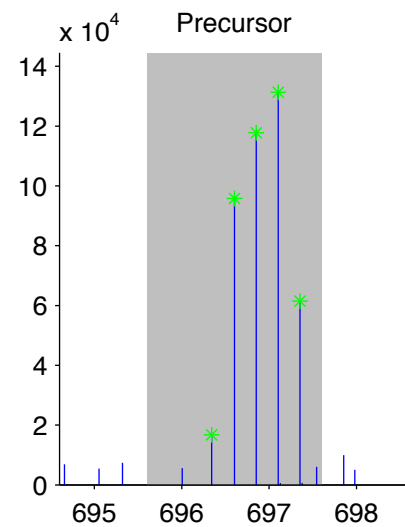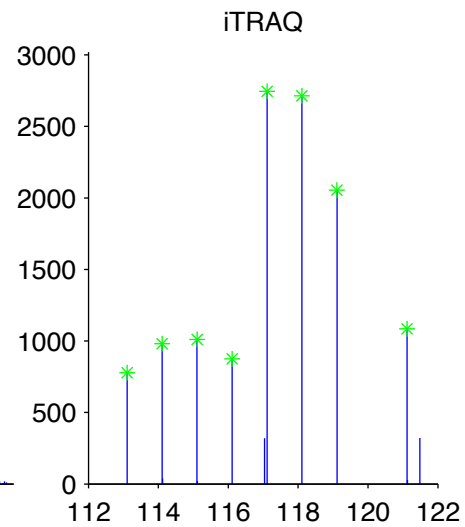

R [ P ] A [ G ] S [ V ] Q [ N ] P [ V ] y [ H ] N [ Q ] P [ L ] N [ P ] A [ P ] S [ R ]

epidermal growth factor receptor isoform a [Homo sapiens]

Charge State: +4

Scan Number: 5072

File Name: HJ050711\_GBMxeno\_bio1\_E\_HANNAH.raw

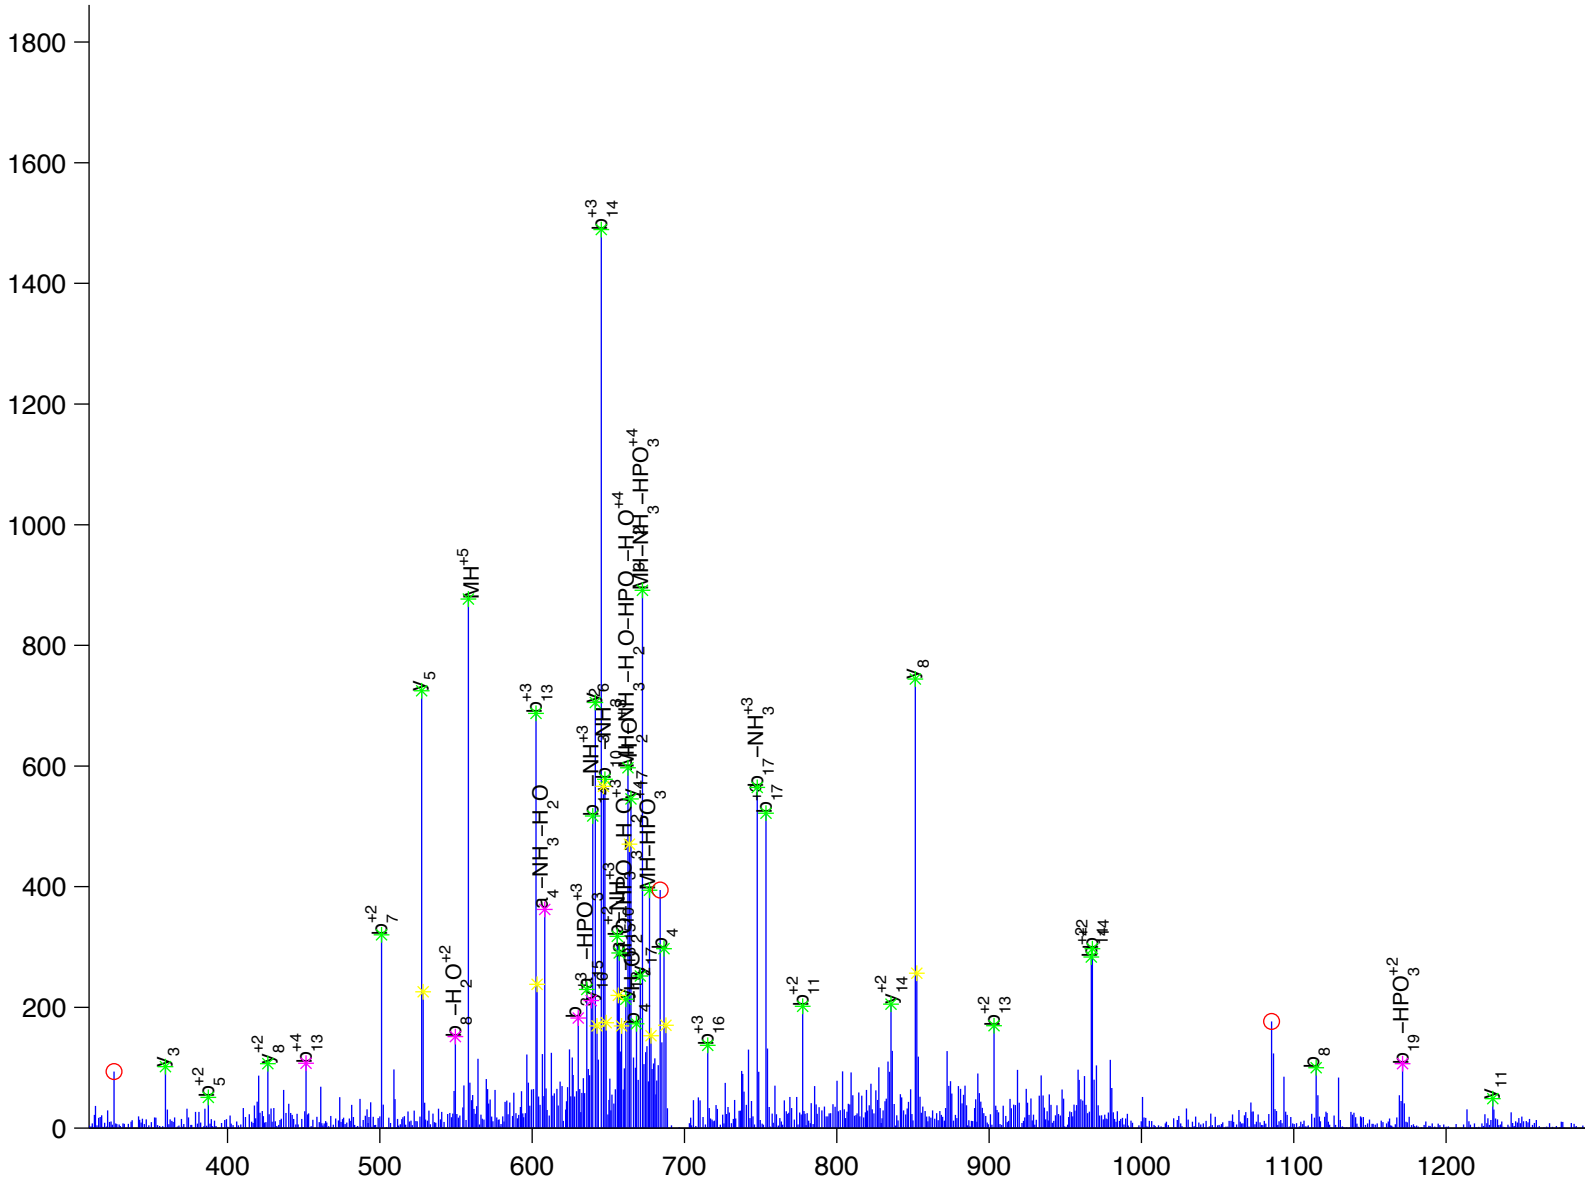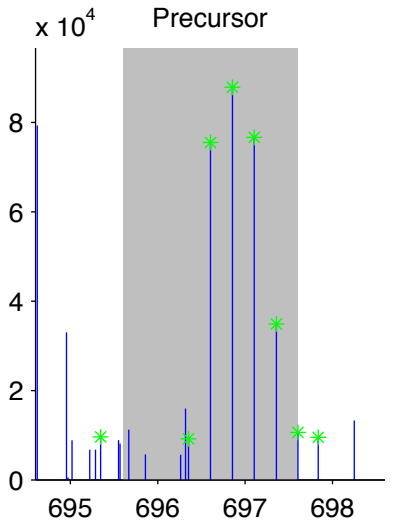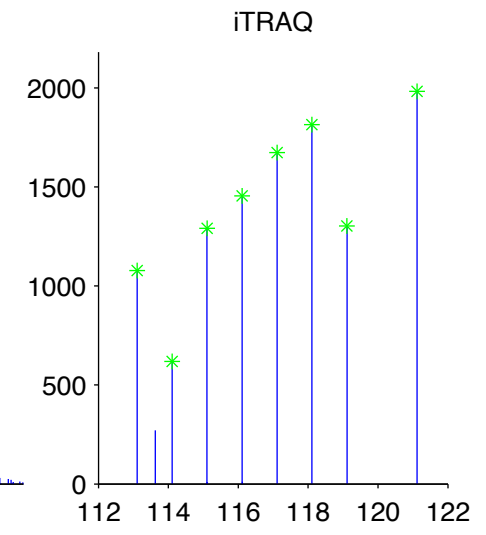

G [ S ] T [ A ] E [ N ] A [ E ] y [ L ] R

epidermal growth factor receptor isoform a [Homo sapiens]

Charge State: +2

Scan Number: 5248

File Name: HJ050711\_GBMxeno\_bio1\_E\_HANNAH.raw

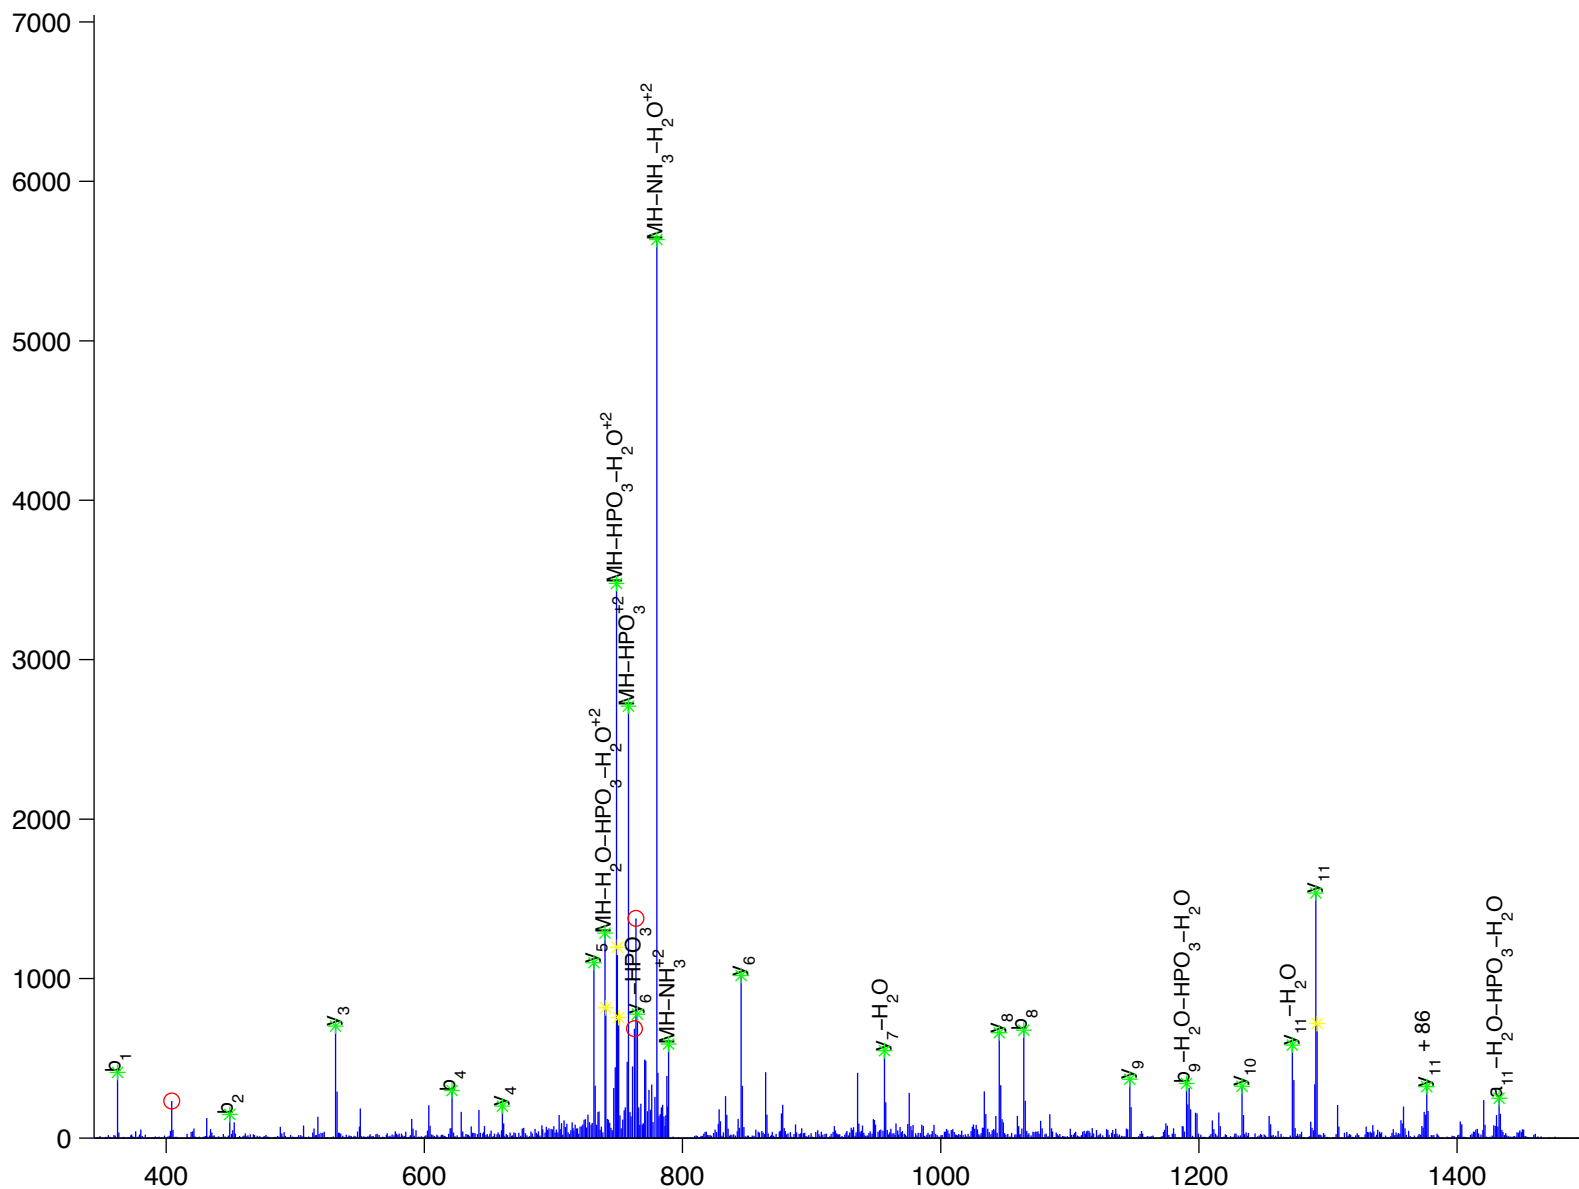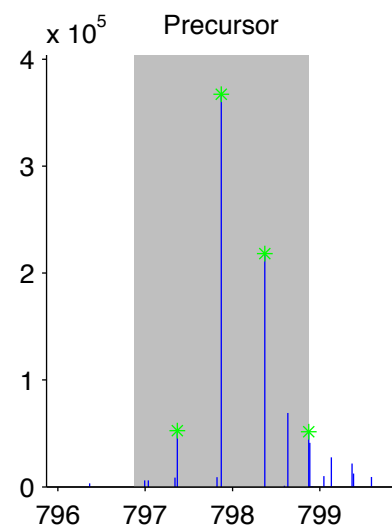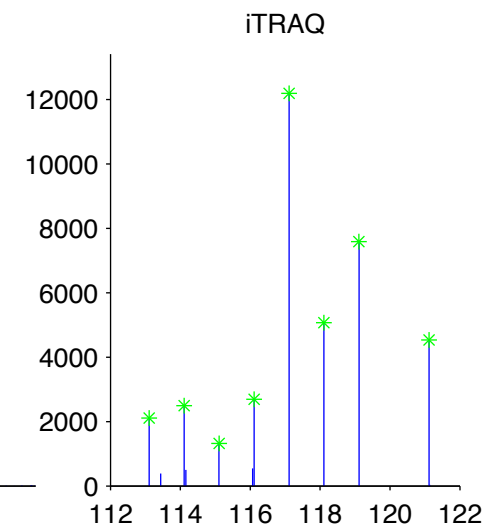

M [ H ] [ L ] [ P ] [ S ] [ P ] [ T ] [ D ] [ S ] [ N ] [ F ] [ y ] R

epidermal growth factor receptor isoform a [Homo sapiens]

Charge State: +3

Scan Number: 6370

File Name: HJ050711\_GBMxeno\_bio1\_E\_HANNAH.raw

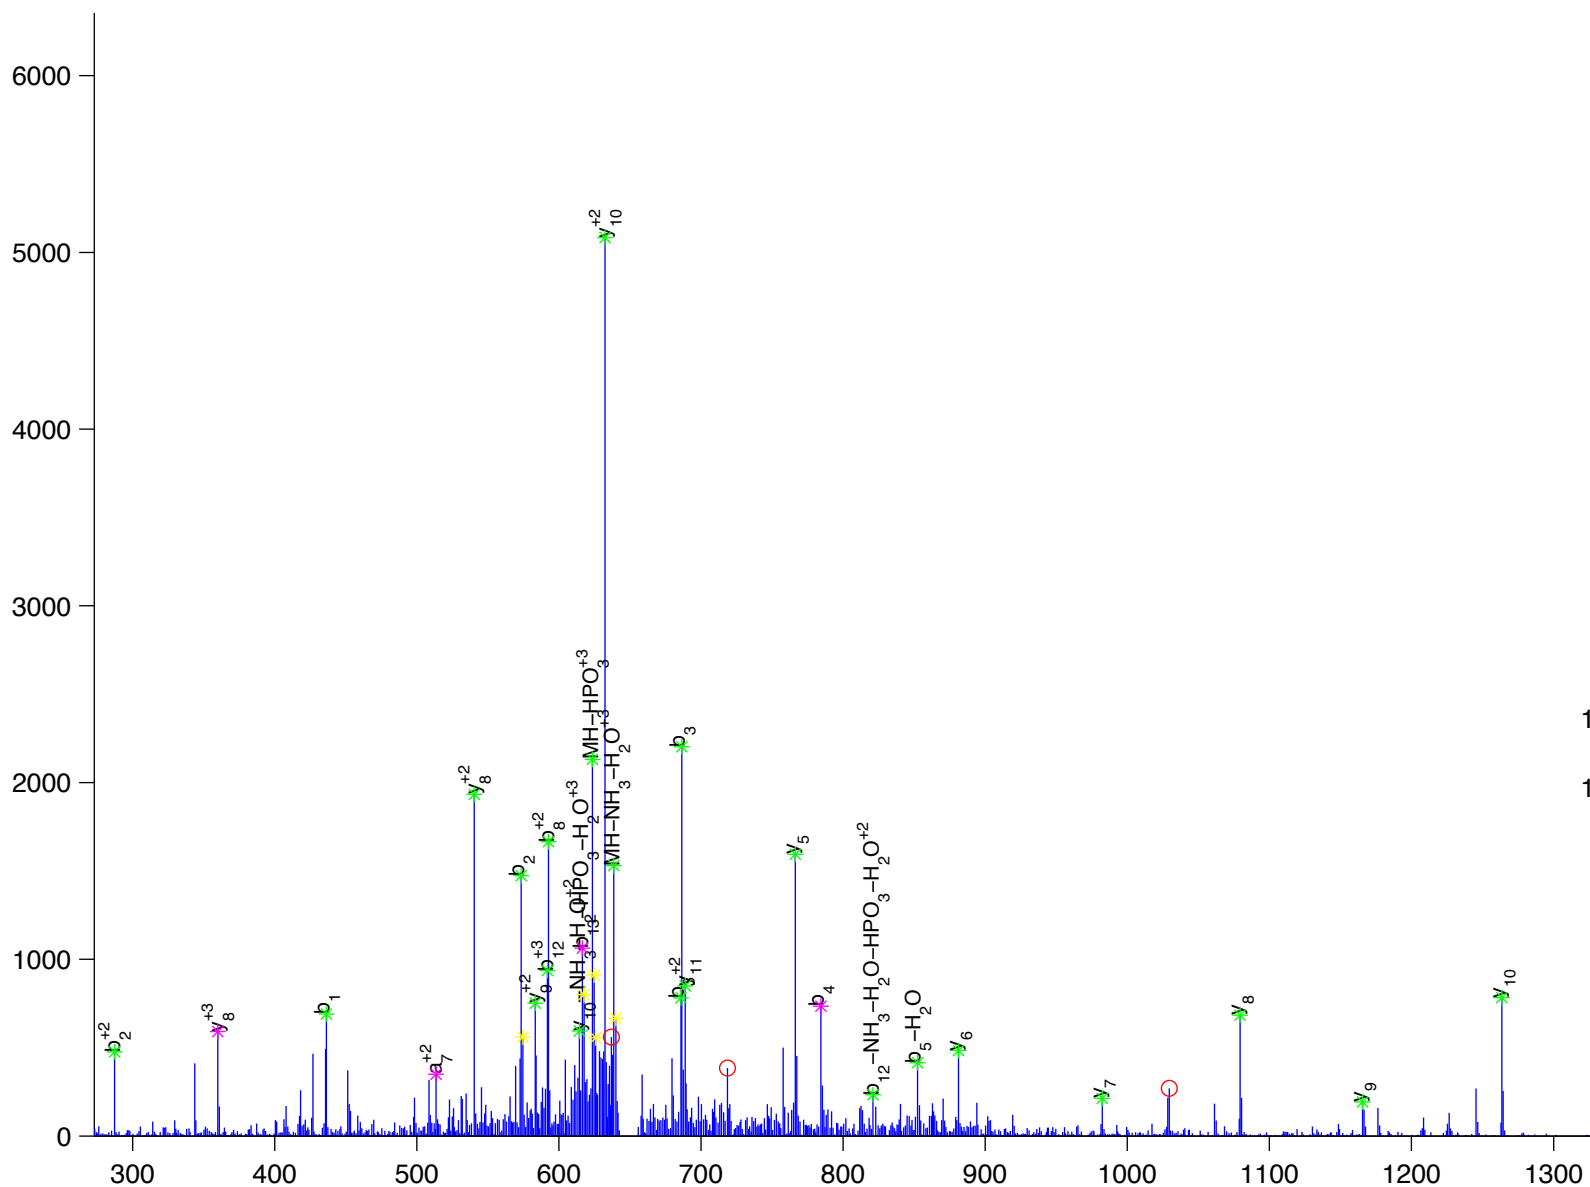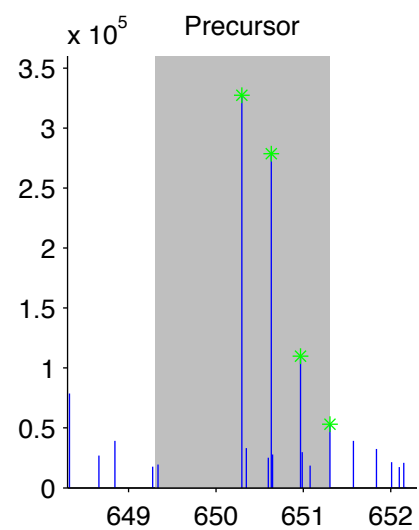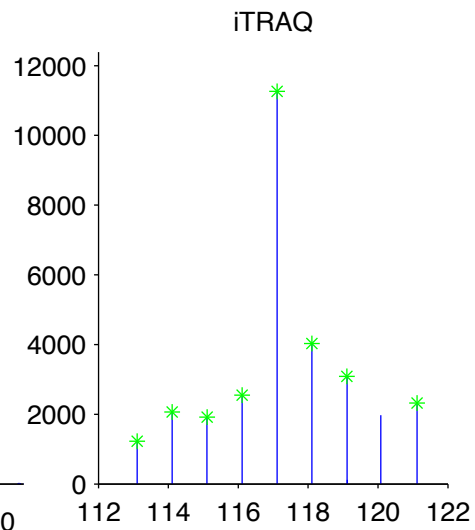



G[S][H][Q][I][S][L][D][N][P][D]y[Q][Q][D][F][F][P]K

epidermal growth factor receptor isoform a [Homo sapiens]

Charge State: +5

Scan Number: 7143

File Name: HJ050711\_GBMxeno\_bio1\_E\_HANNAH.raw

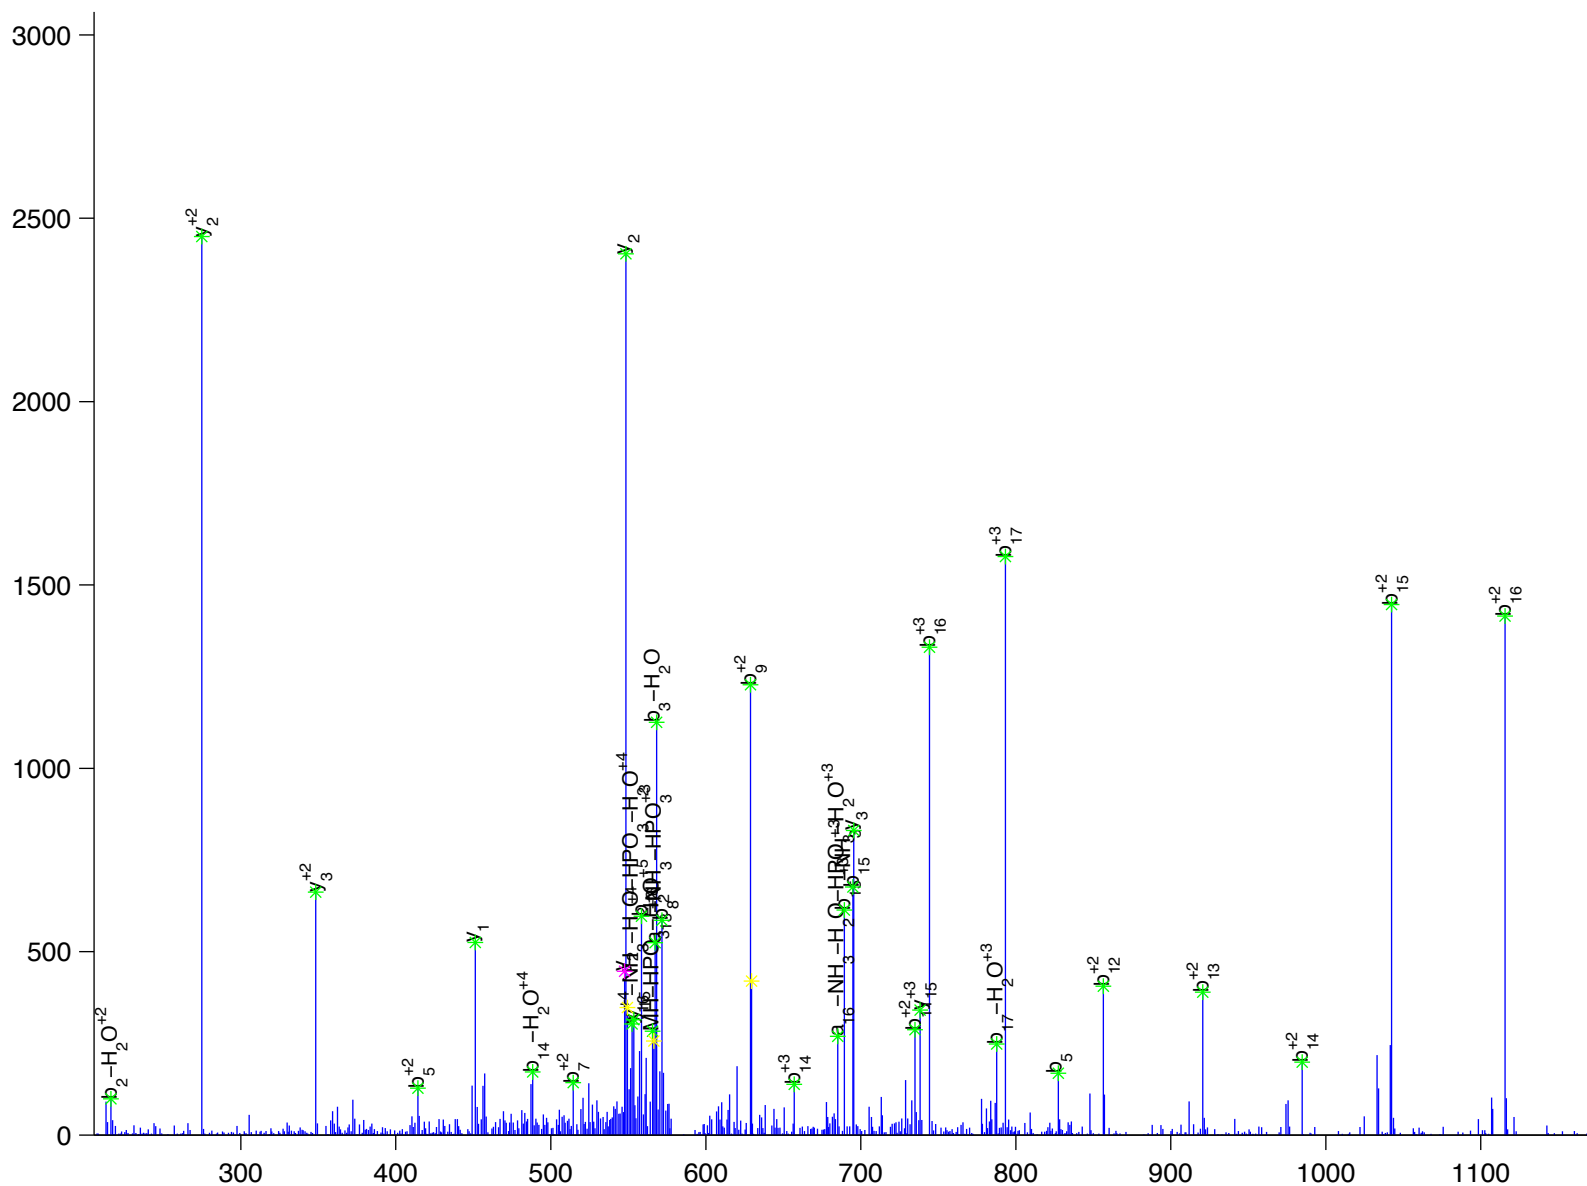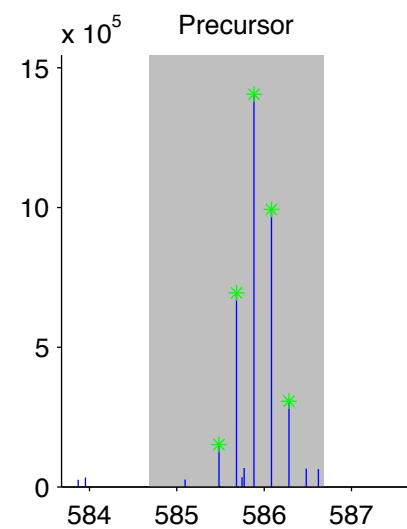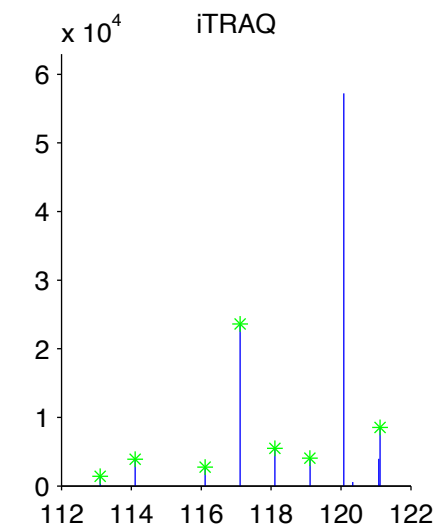

G[S][H][Q][I][S][L][D][N][P][D]y[Q][Q][D][F][F][P]K

epidermal growth factor receptor isoform a [Homo sapiens]

Charge State: +4

Scan Number: 7172

File Name: HJ050711\_GBMxeno\_bio1\_E\_HANNAH.raw

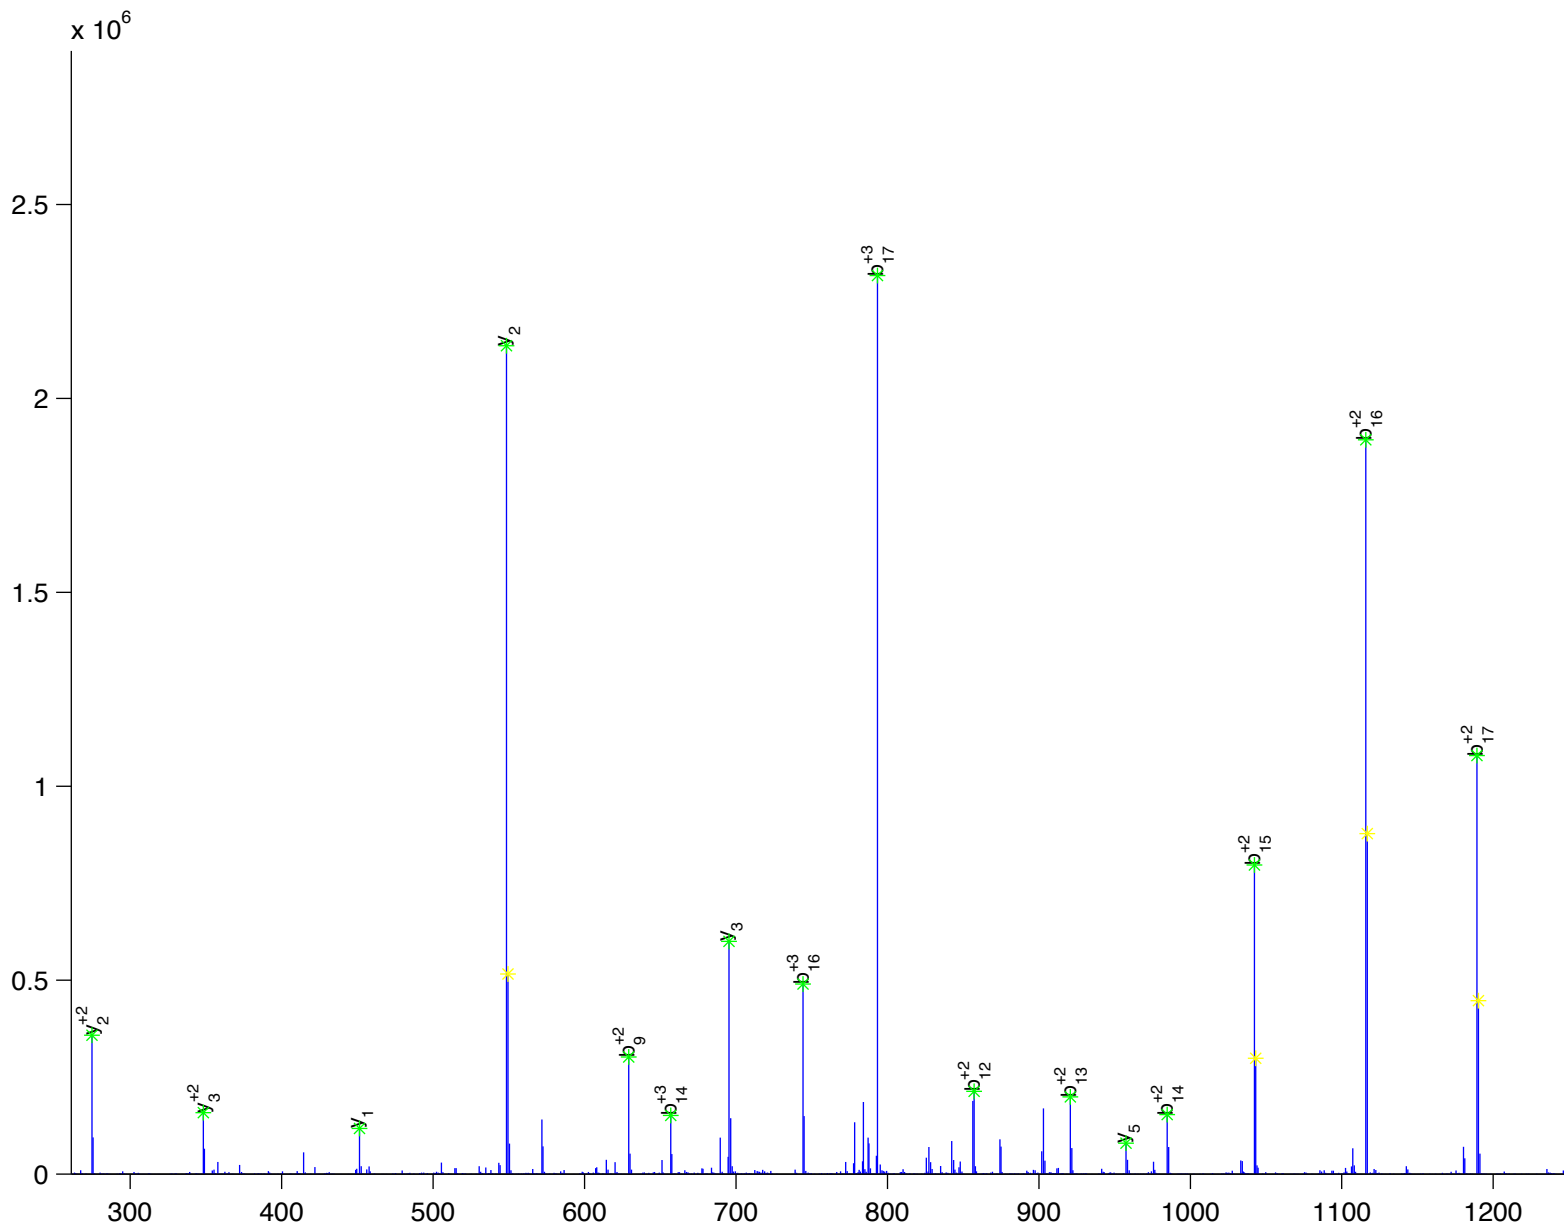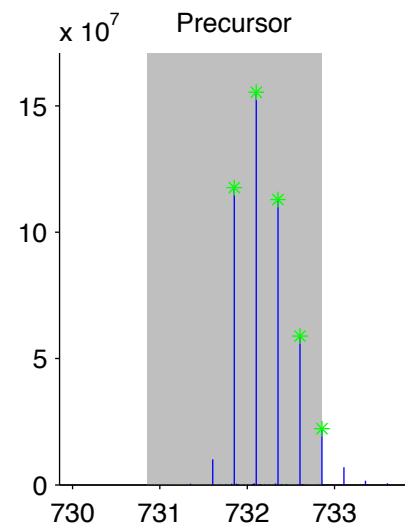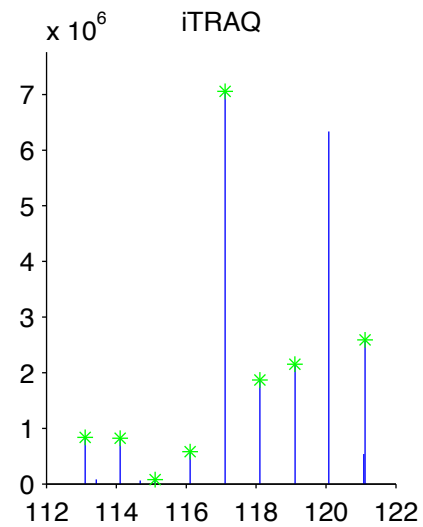

G[S][H][Q][I][S][L][D][N][P][D]y[Q][Q][D][F][F][P]K

epidermal growth factor receptor isoform a [Homo sapiens]

Charge State: +3

Scan Number: 7206

File Name: HJ050711\_GBMxeno\_bio1\_E\_HANNAH.raw

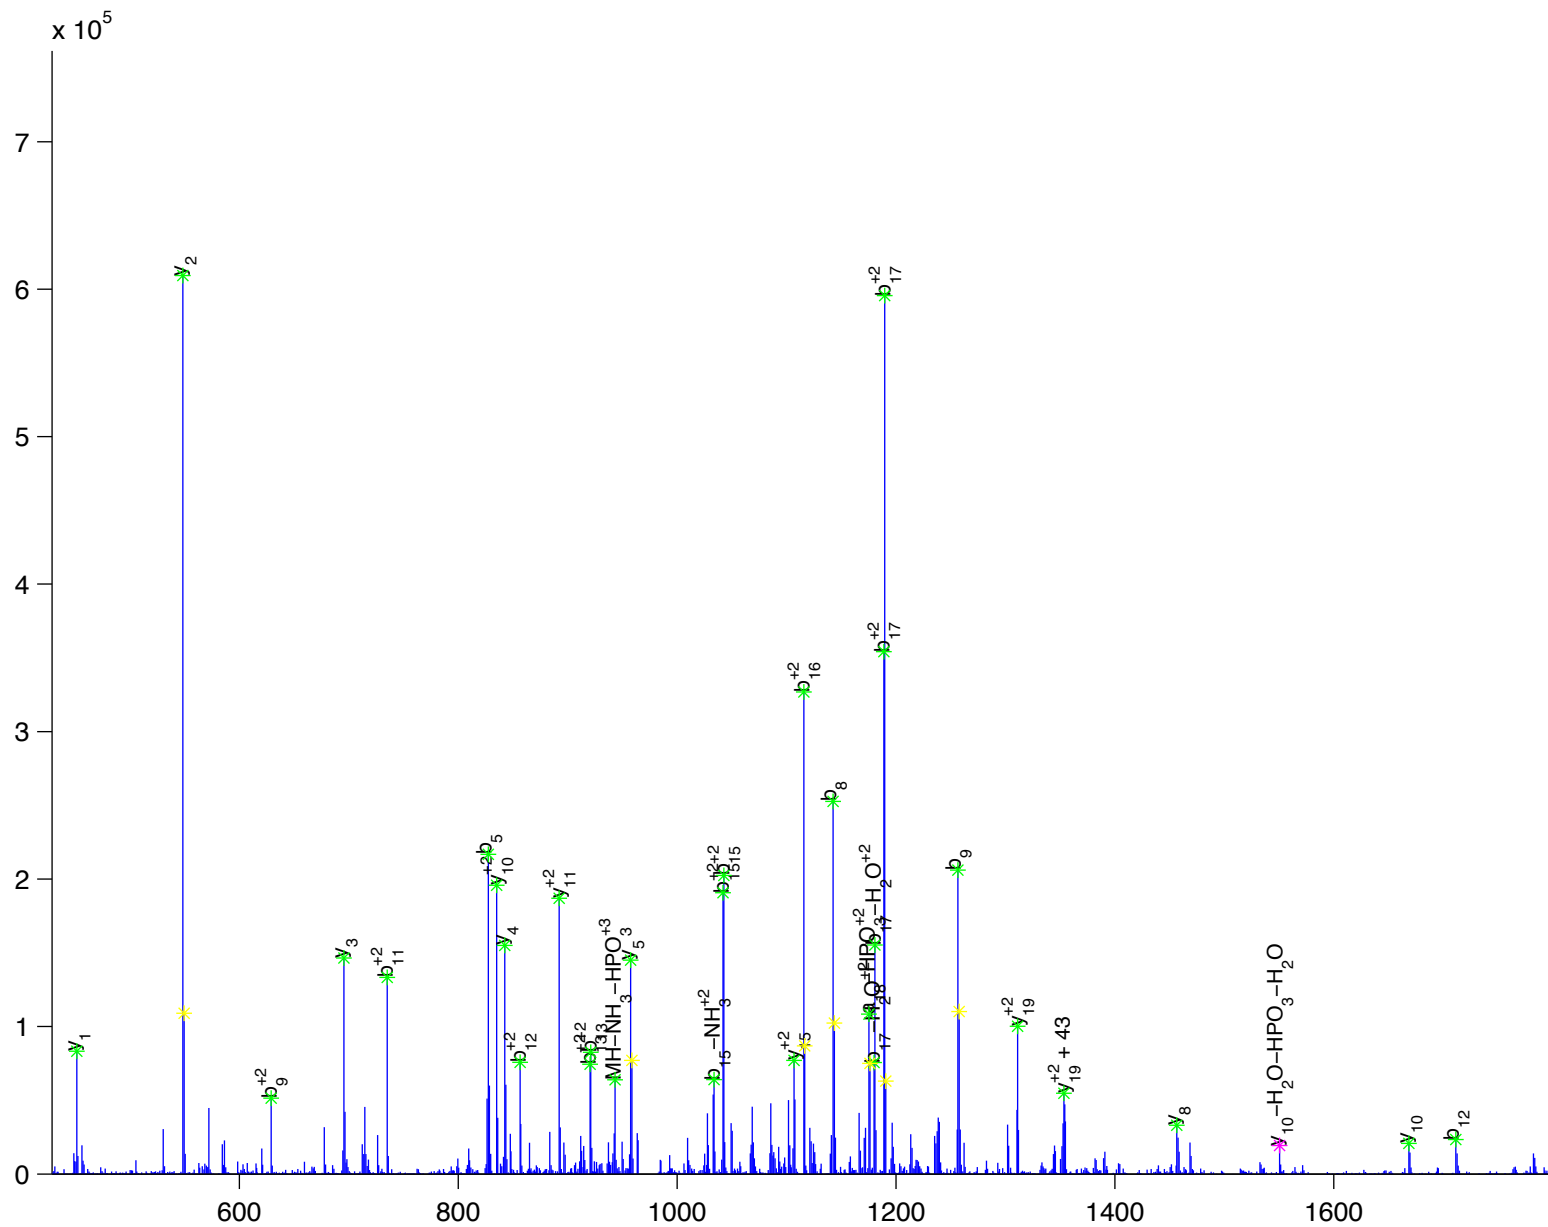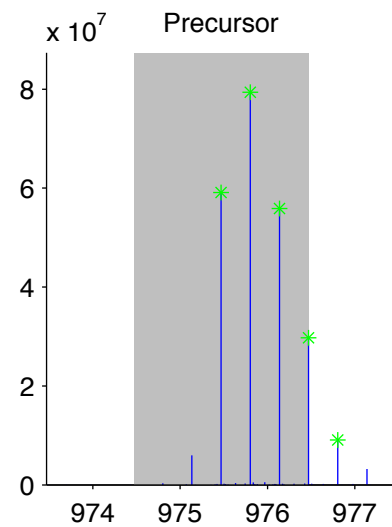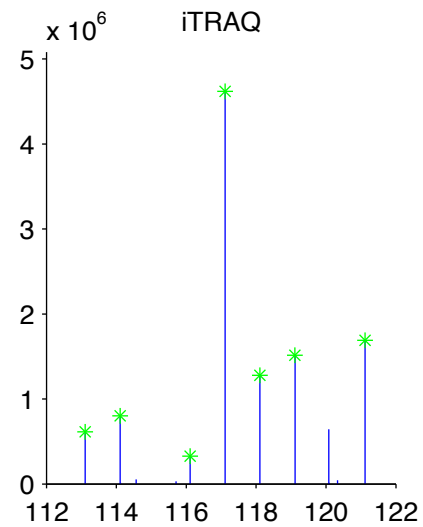

G [ S ] [ H ] [ Q ] [ I ] [ S ] [ L ] [ D ] [ N ] [ P ] [ D ] [ y ] [ Q ] [ Q ] [ D ] [ F ] [ F ] [ P ] [ K ]

epidermal growth factor receptor isoform a [Homo sapiens]

Charge State: +3

Scan Number: 7275

File Name: HJ050711\_GBMxeno\_bio1\_E\_HANNAH.raw

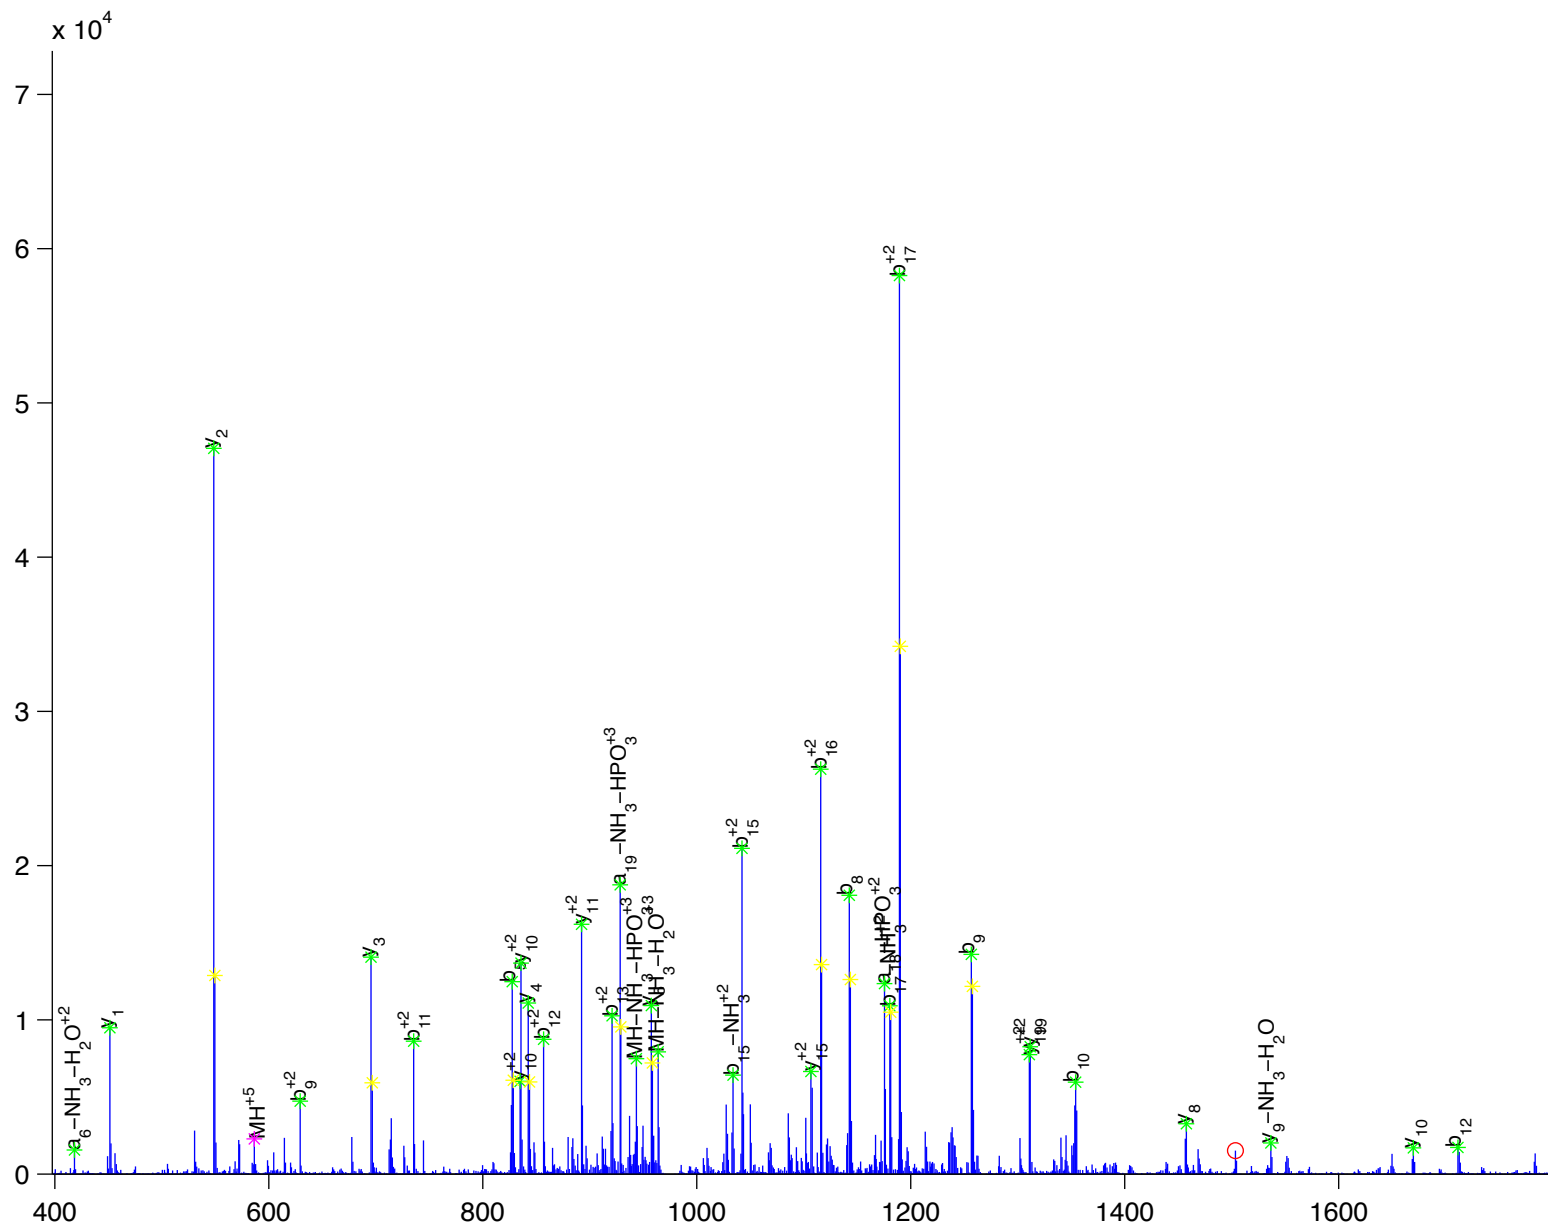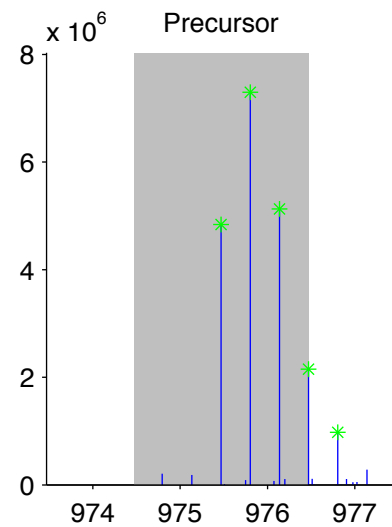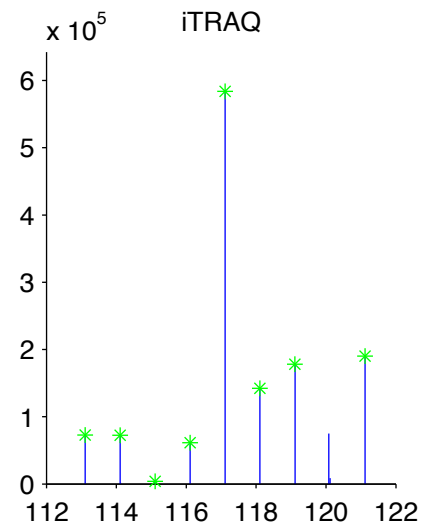

G[S]H[Q]I[S]L[D]N[P]D[y]Q[Q]D[F]F[P]K

epidermal growth factor receptor isoform a [Homo sapiens]

Charge State: +4

Scan Number: 7317

File Name: HJ050711\_GBMxeno\_bio1\_E\_HANNAH.raw

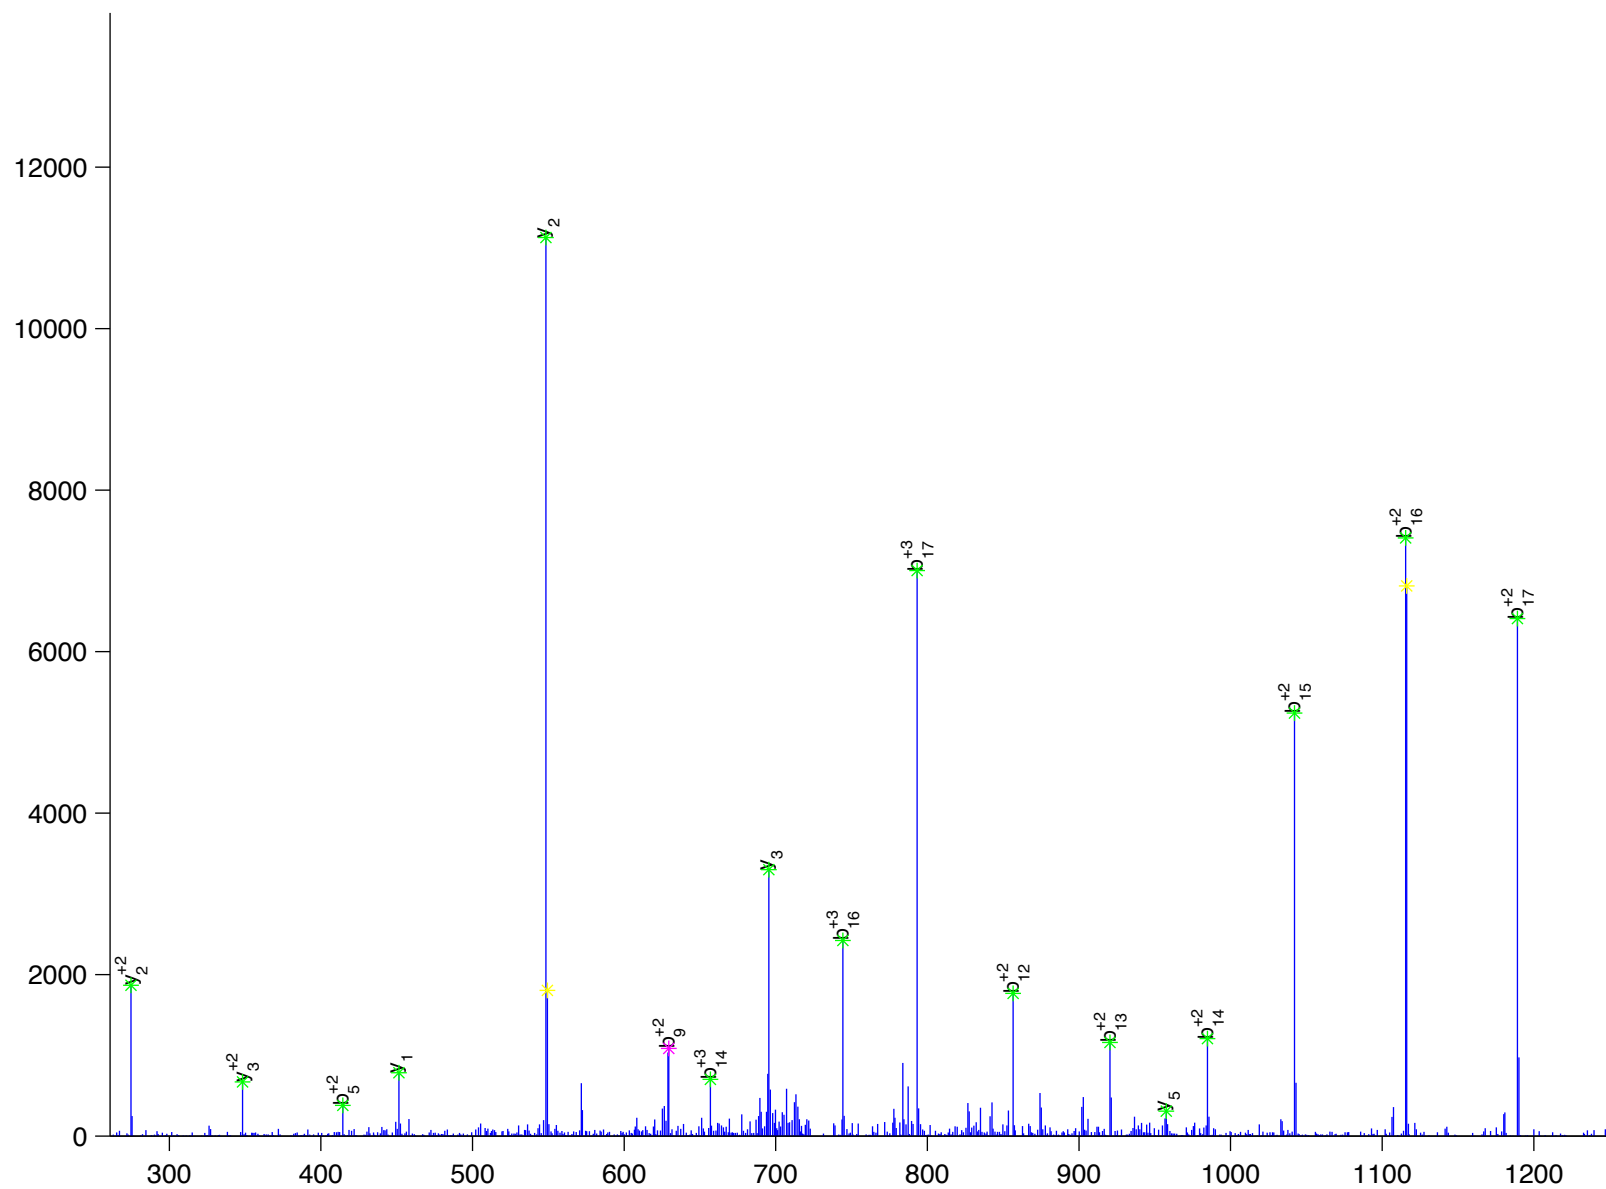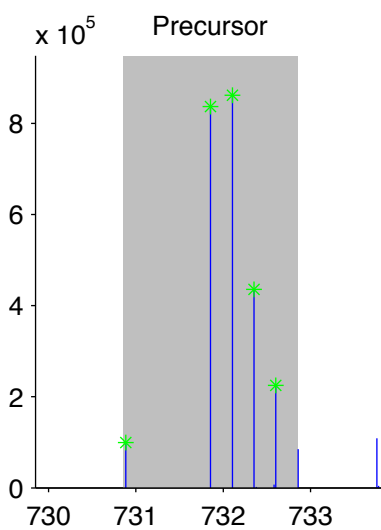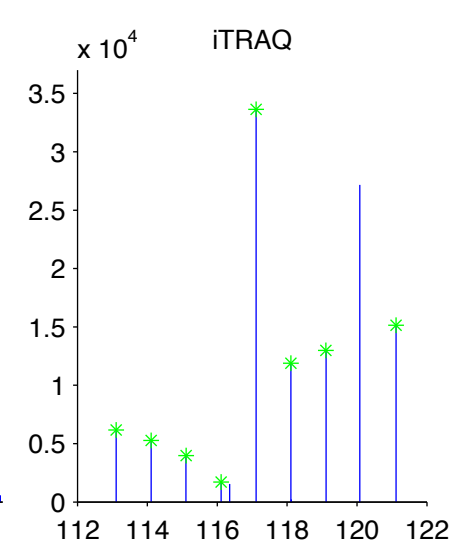

G[S]H[Q]I[S]L[D]N[P]D[y]Q[Q]D[F]F[P]K

epidermal growth factor receptor isoform a [Homo sapiens]

Charge State: +3

Scan Number: 7445

File Name: HJ050711\_GBMxeno\_bio1\_E\_HANNAH.raw

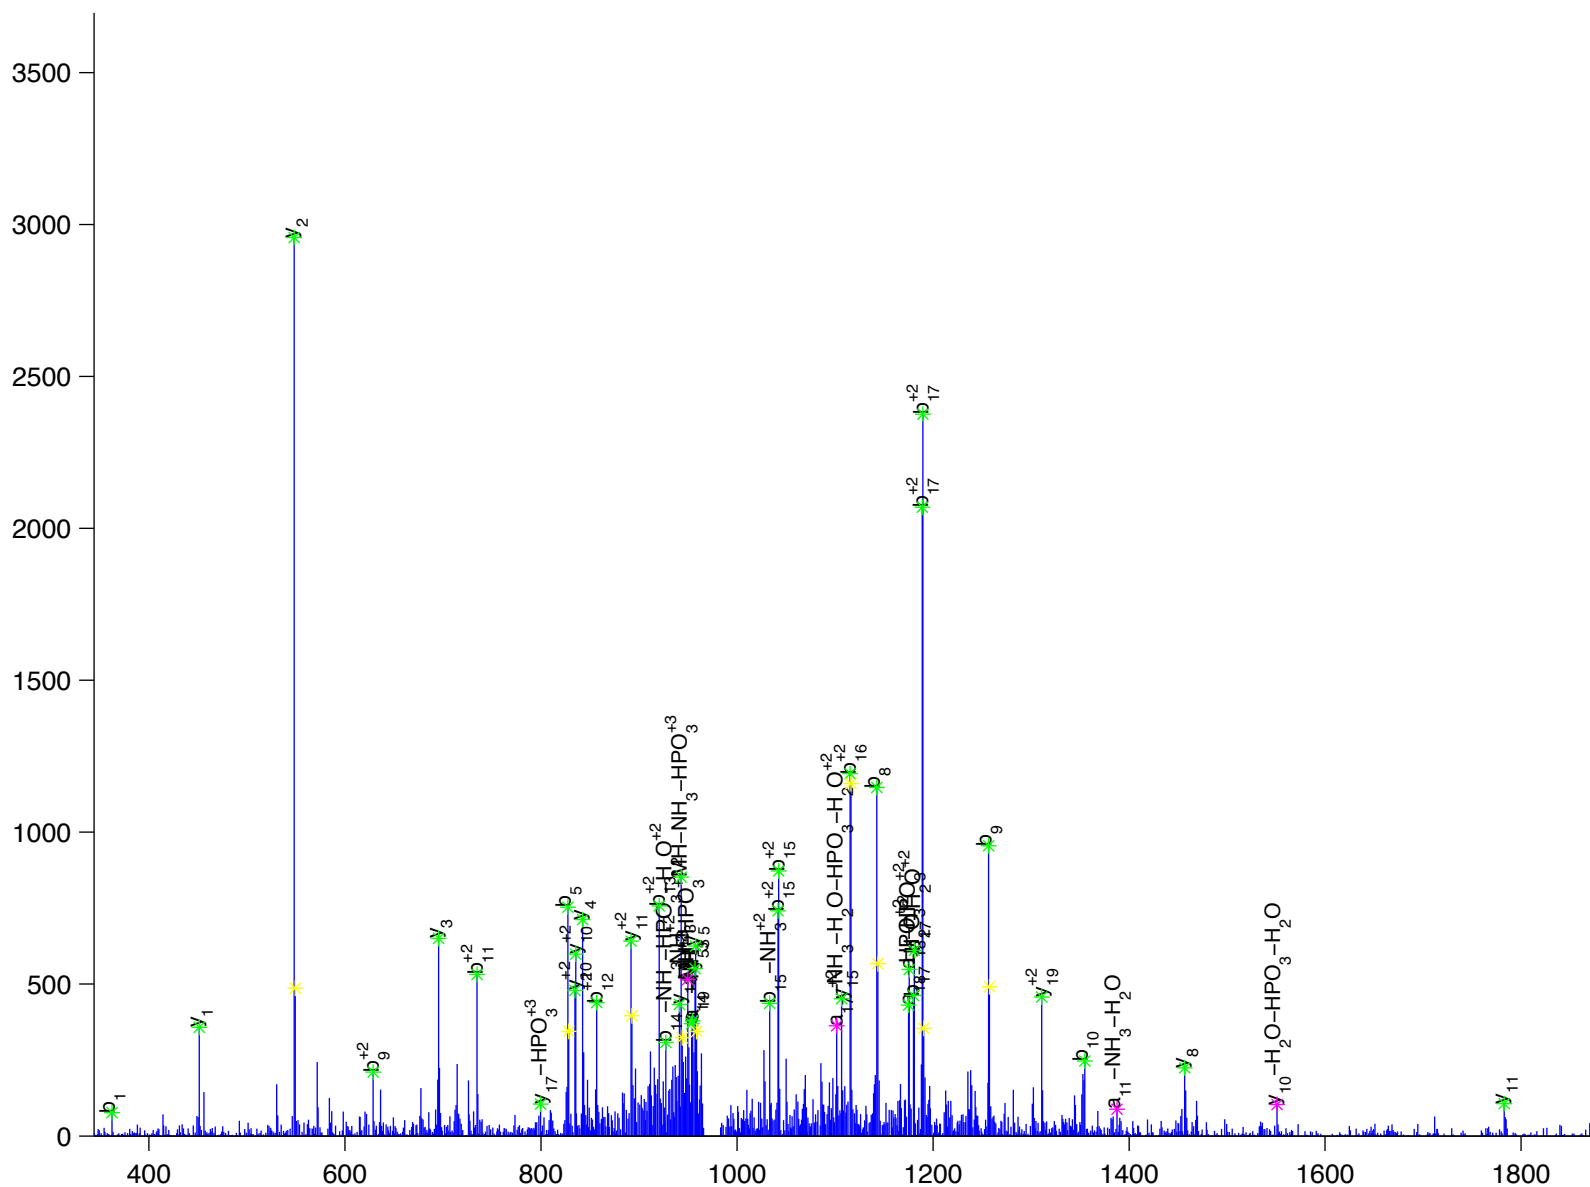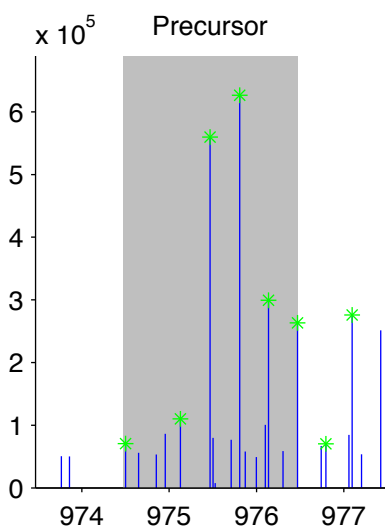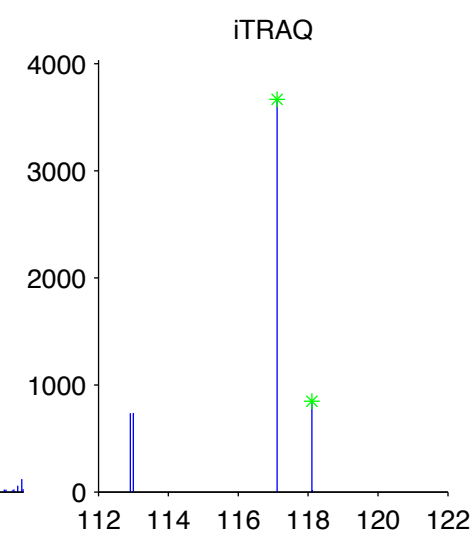

G[S]H[Q]I[s]L[D]N[P]D[y]Q[Q]D[F]F[P]K

epidermal growth factor receptor isoform a [Homo sapiens]

Charge State: +3

Scan Number: 7878

File Name: HJ050711\_GBMxeno\_bio1\_E\_HANNAH.raw

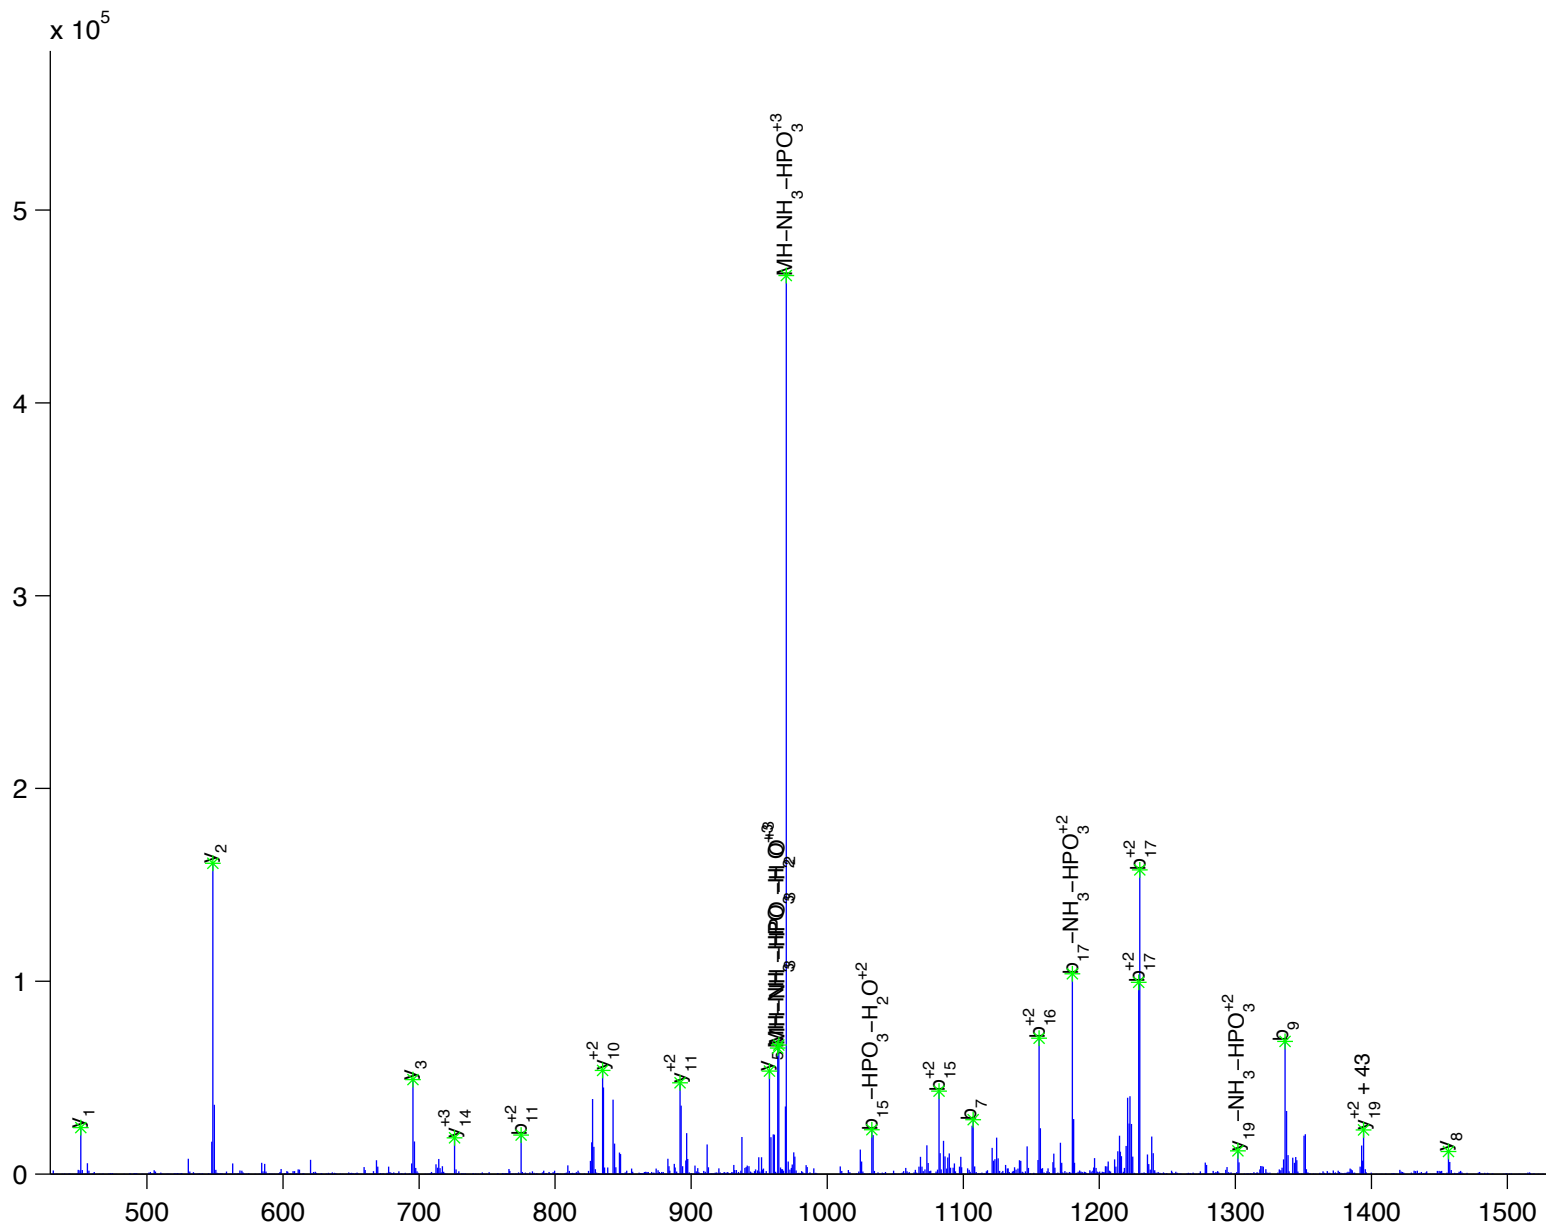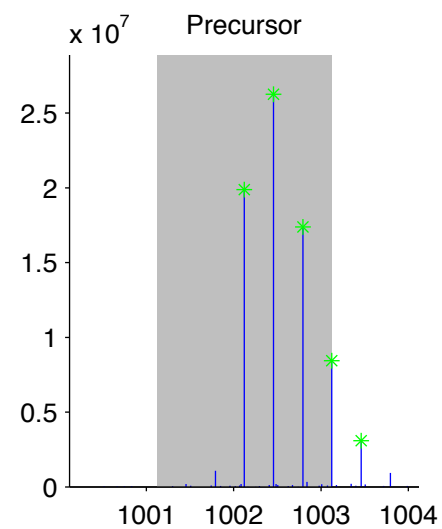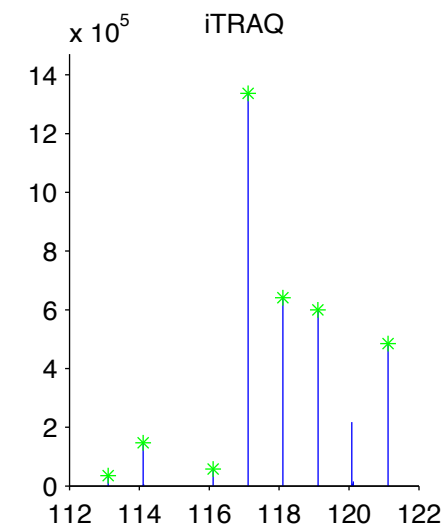

G[S]H[Q]I[s]L[D]N[P]D[y]Q[Q]D[F]F[P]K

epidermal growth factor receptor isoform a [Homo sapiens]

Charge State: +4

Scan Number: 7880

File Name: HJ050711\_GBMxeno\_bio1\_E\_HANNAH.raw

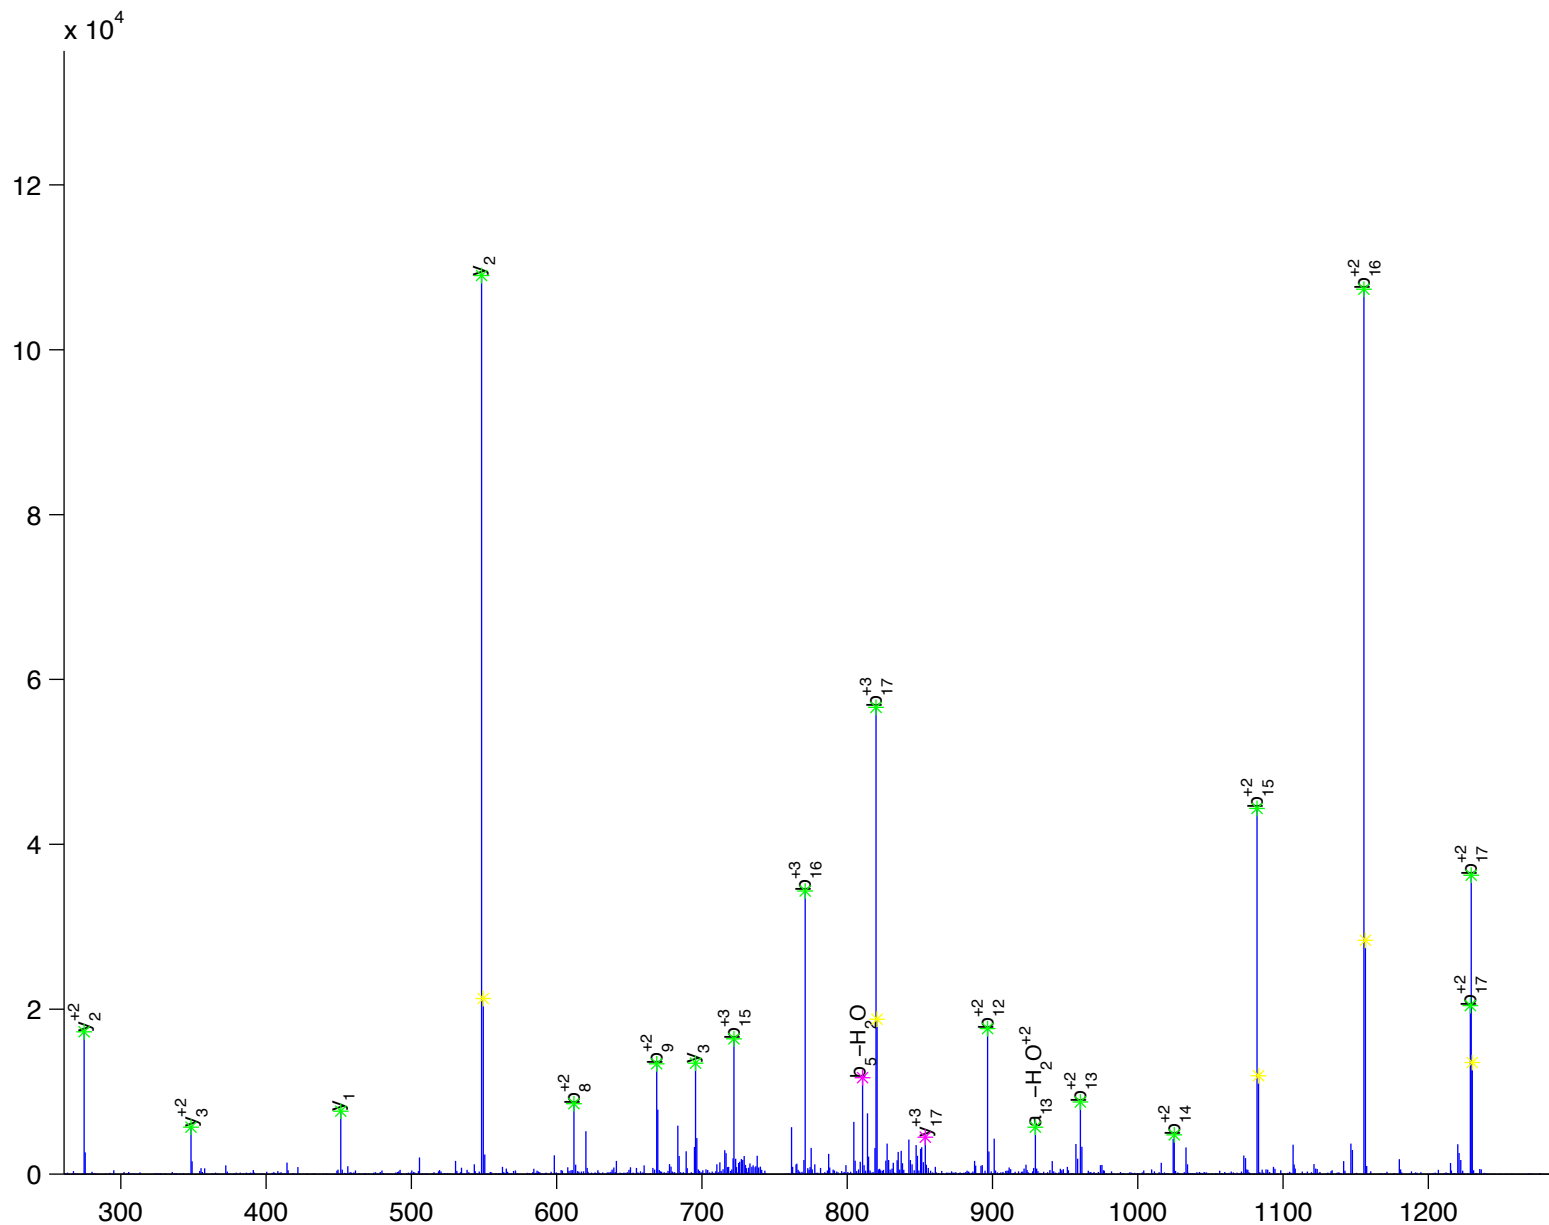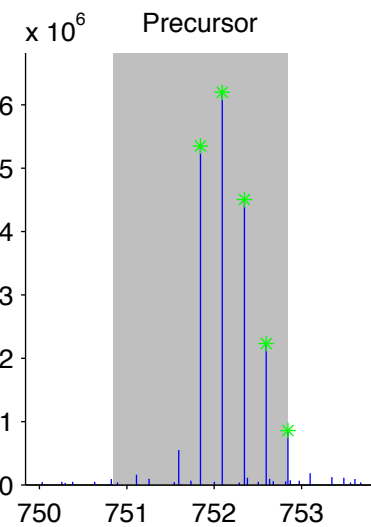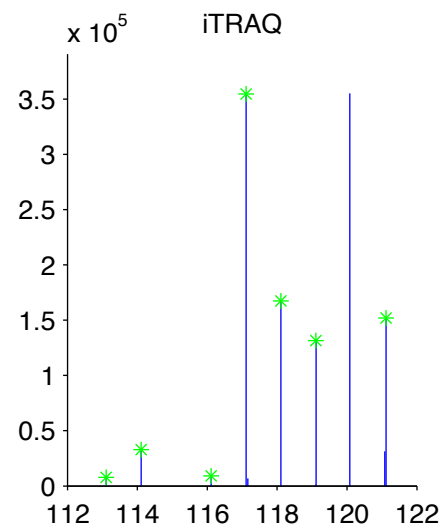



G[S]H[Q]I[s]L[D]N[P]D[y]Q[Q]D[F]F[P]K

epidermal growth factor receptor isoform a [Homo sapiens]

Charge State: +3

Scan Number: 8167

File Name: HJ050711\_GBMxeno\_bio1\_E\_HANNAH.raw

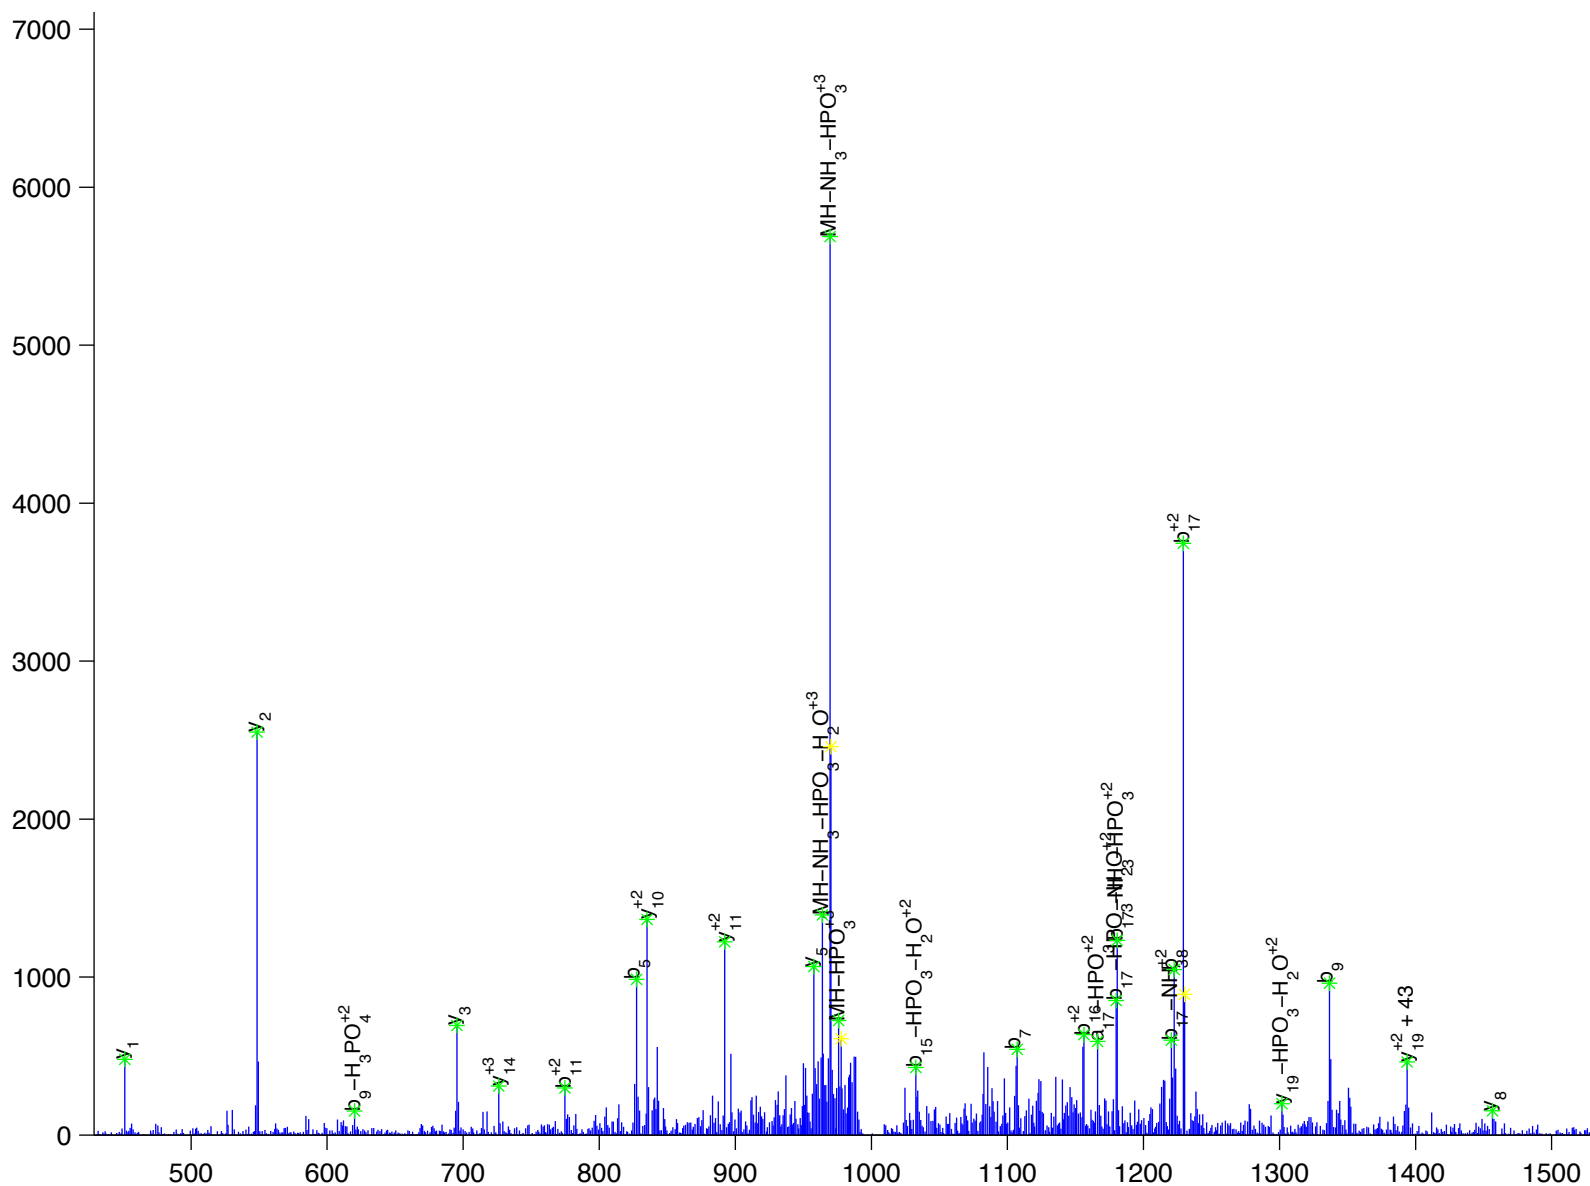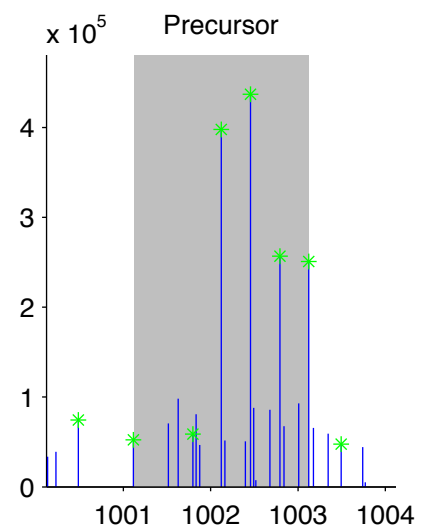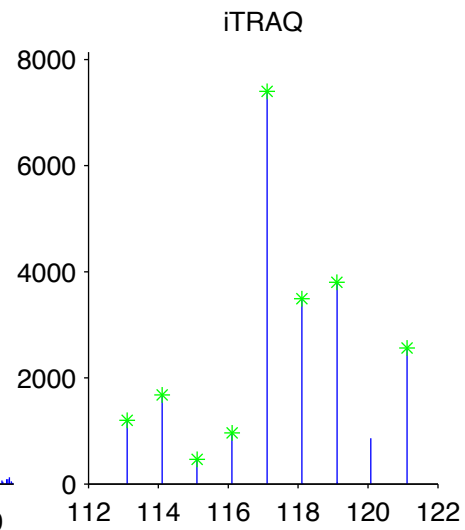

Y[S]S[D]P[T]G[A]L[T]E[D]S[I]D[D]T[F]L[P]V[P]E[y]I[N]Q[S]V[P]K

epidermal growth factor receptor isoform a [Homo sapiens]

Charge State: +4

Scan Number: 9726

File Name: HJ050711\_GBMxeno\_bio1\_E\_HANNAH.raw

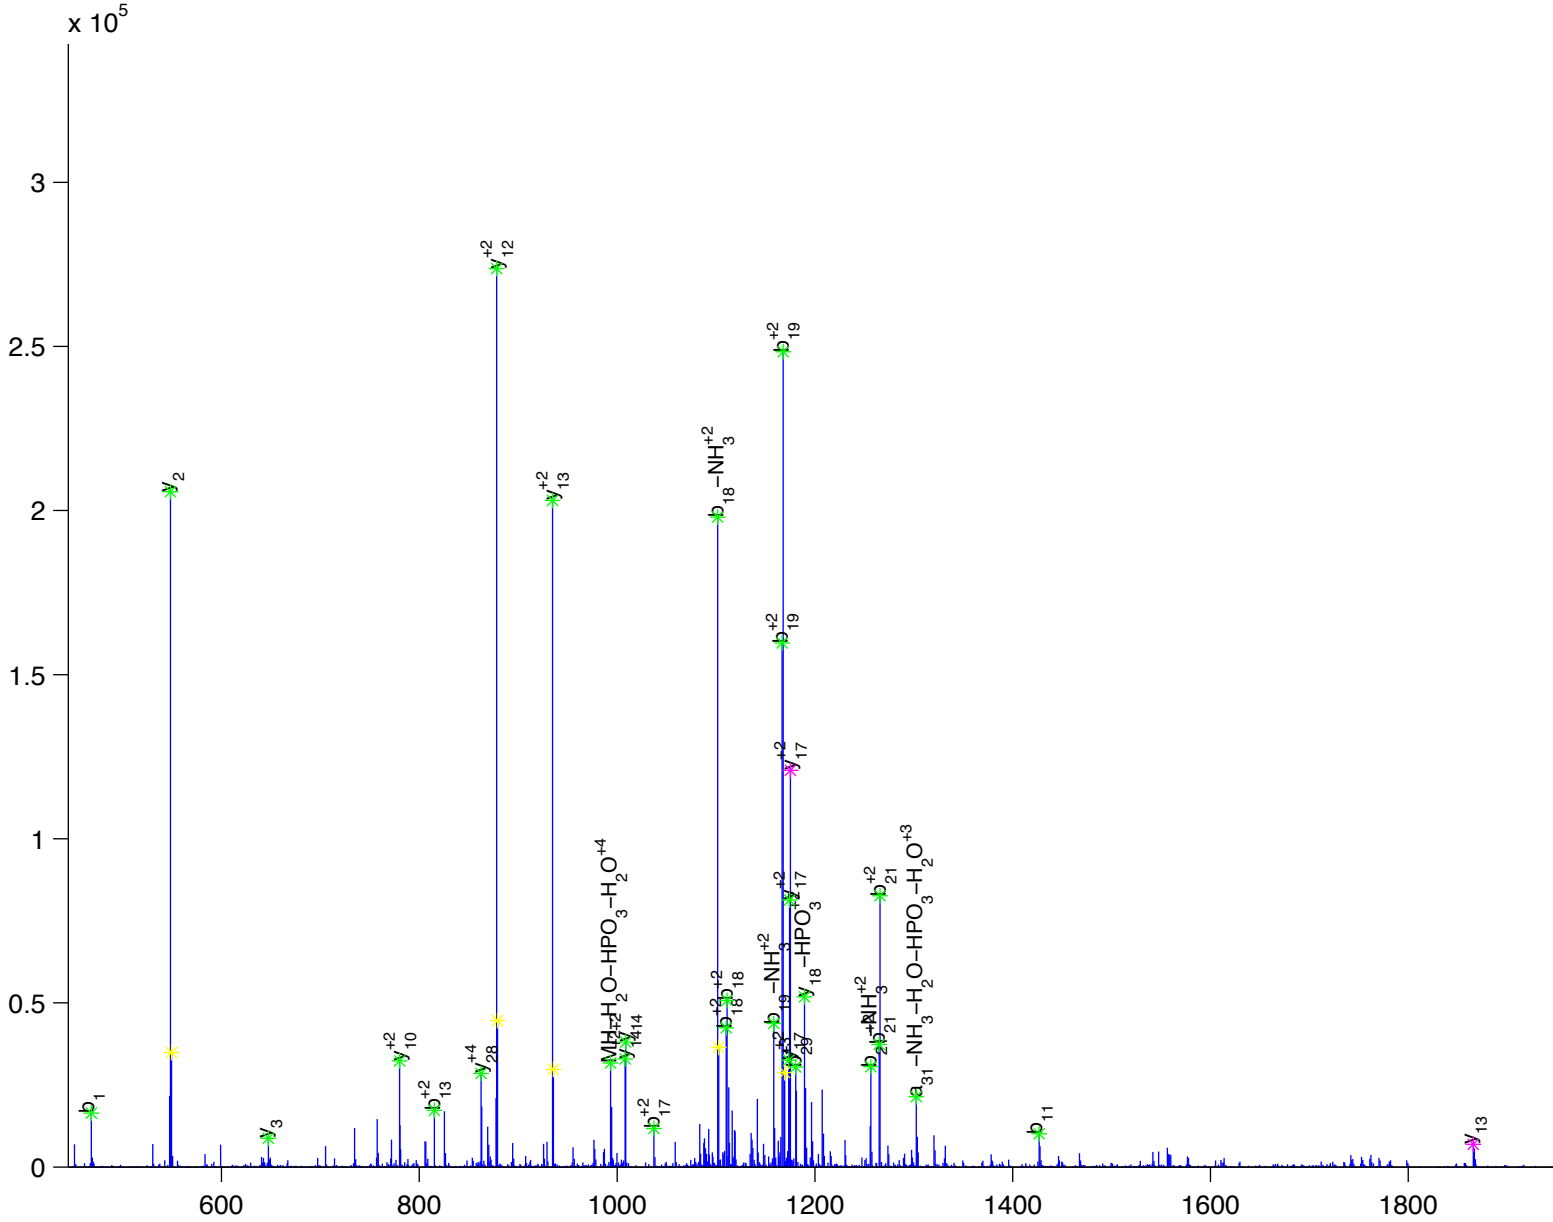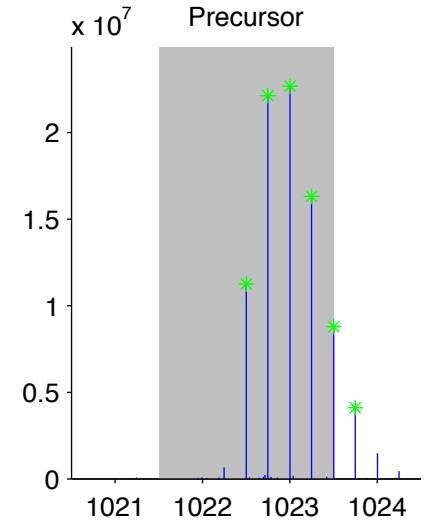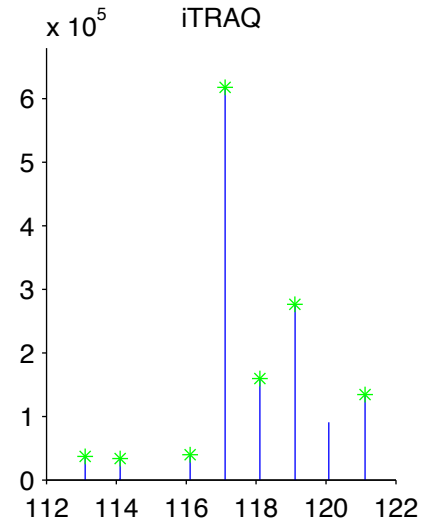

Y[S]S[D]P[T]G[A]L[T]E[D]S[I]D[D]T[F]L[P]V[P]E[y]I[N]Q[S]V[P]K

epidermal growth factor receptor isoform a [Homo sapiens]

Charge State: +4

Scan Number: 9757

File Name: HJ050711\_GBMxeno\_bio1\_E\_HANNAH.raw

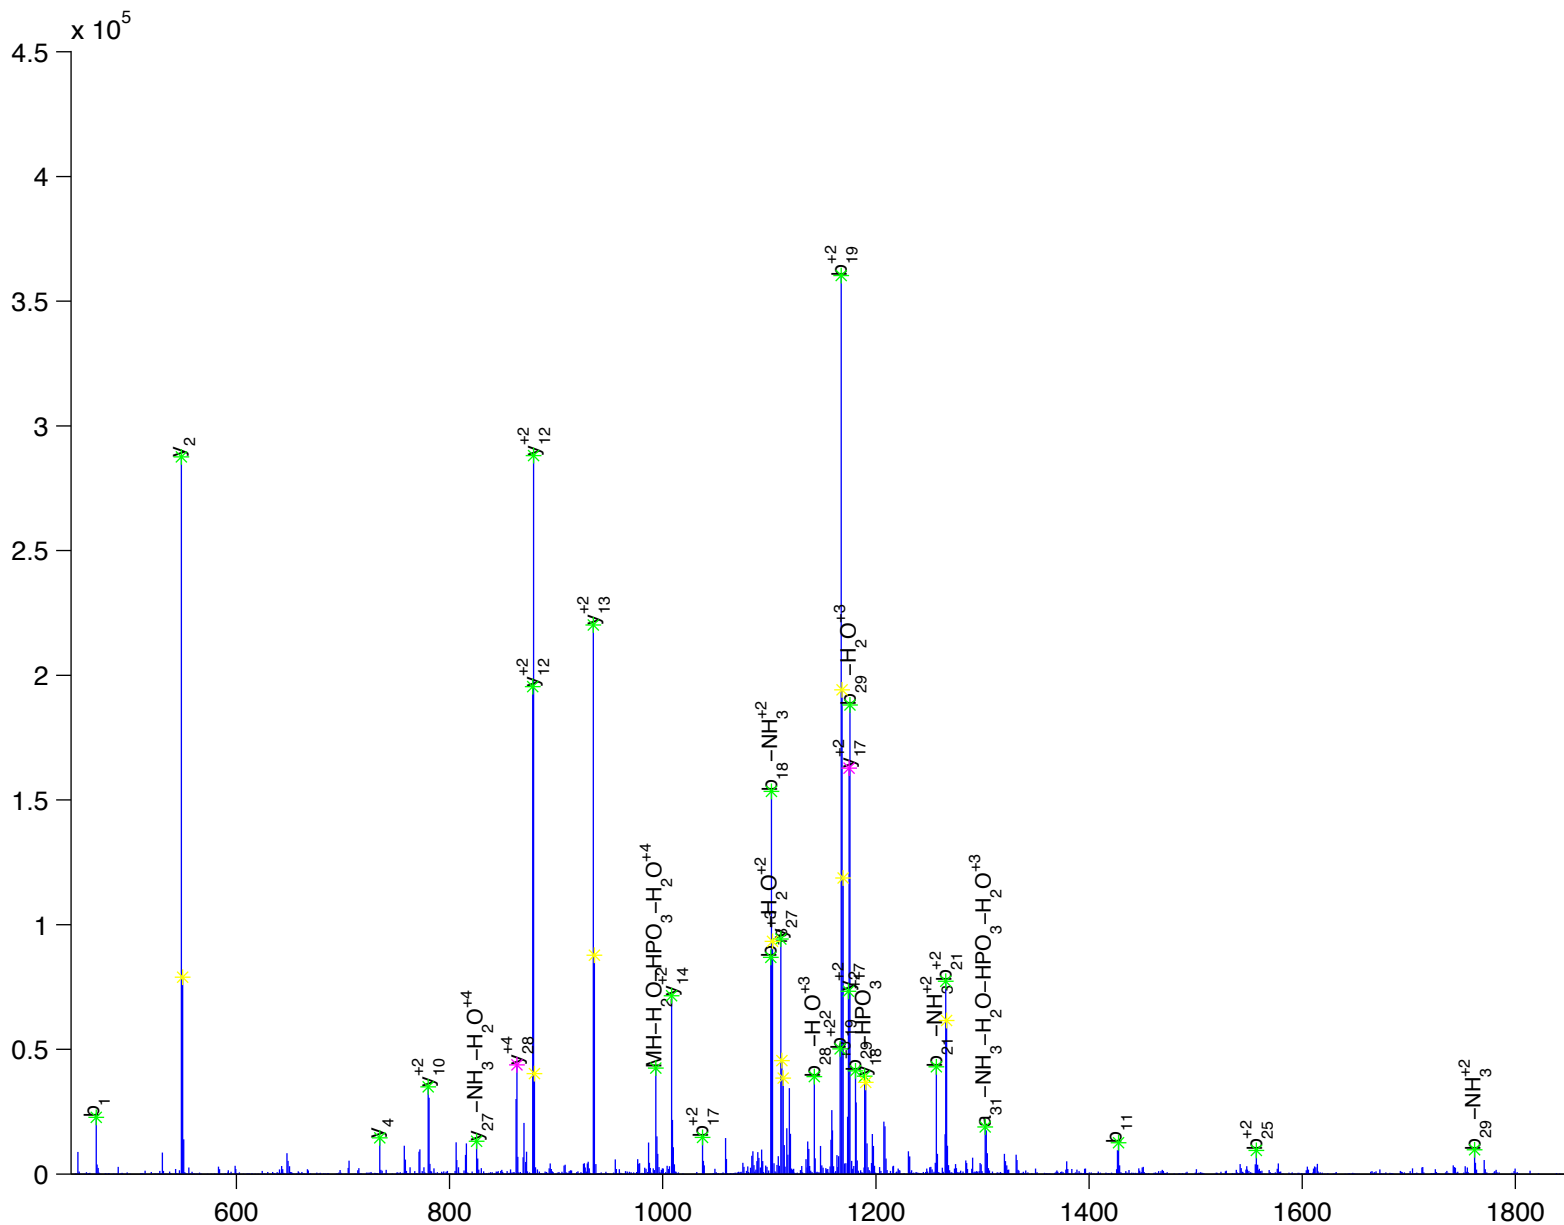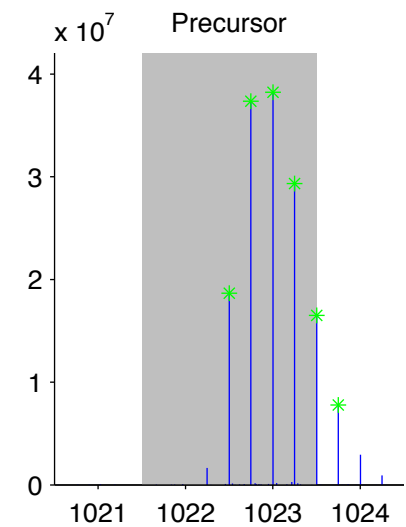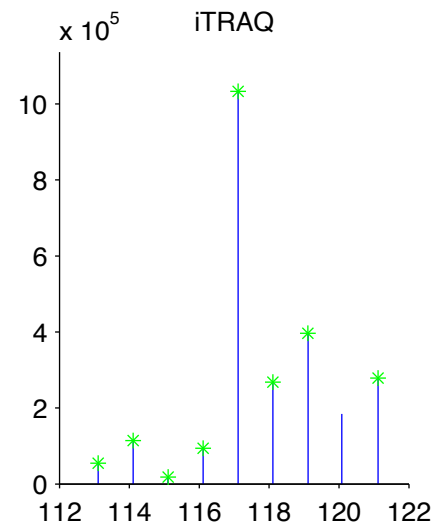

Y[S]S[D]P[T]G[A]L[T]E[D]S[I]D[D]T[F]L[P]V[P]E[y]I[N]Q[S]V[P]K

epidermal growth factor receptor isoform a [Homo sapiens]

Charge State: +4

Scan Number: 9915

File Name: HJ050711\_GBMxeno\_bio1\_E\_HANNAH.raw

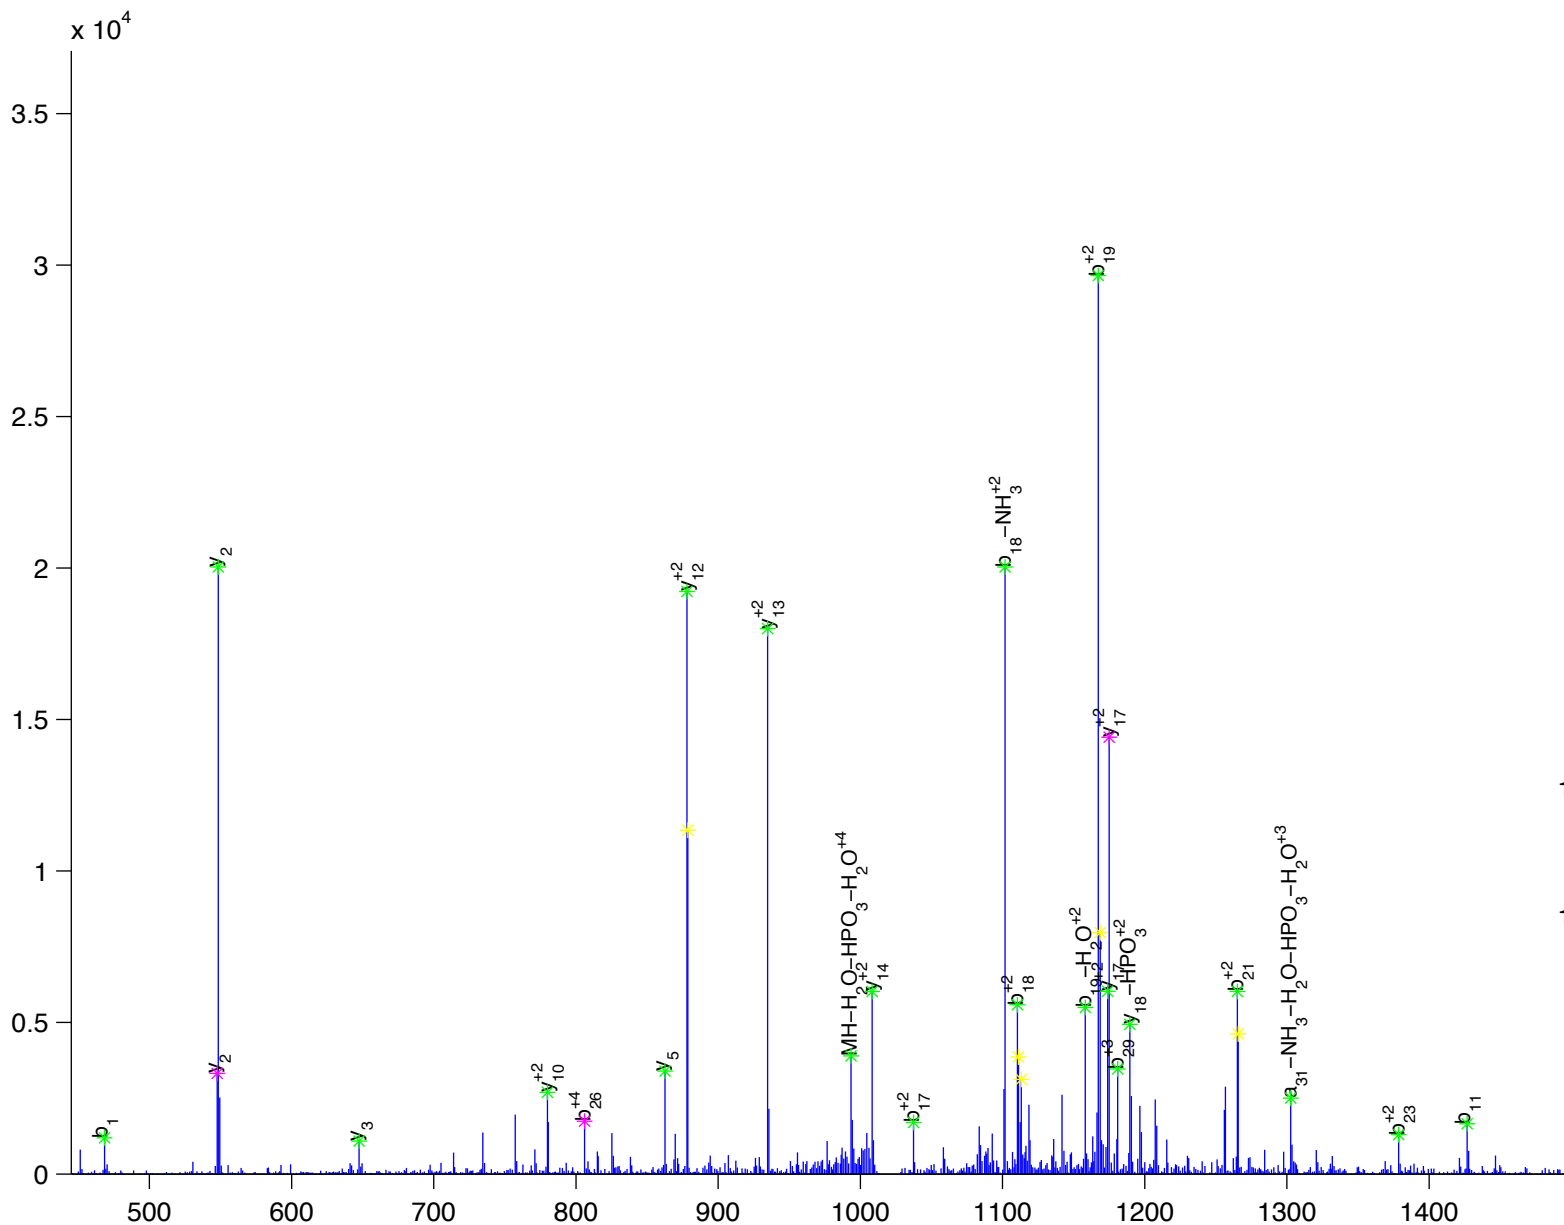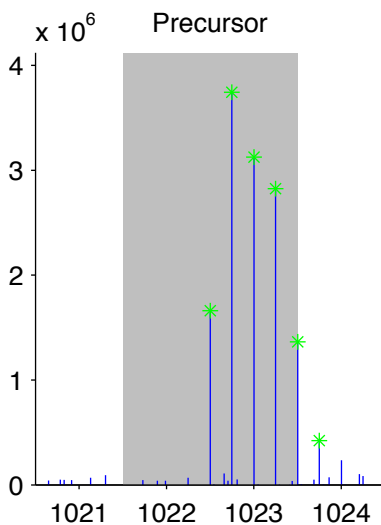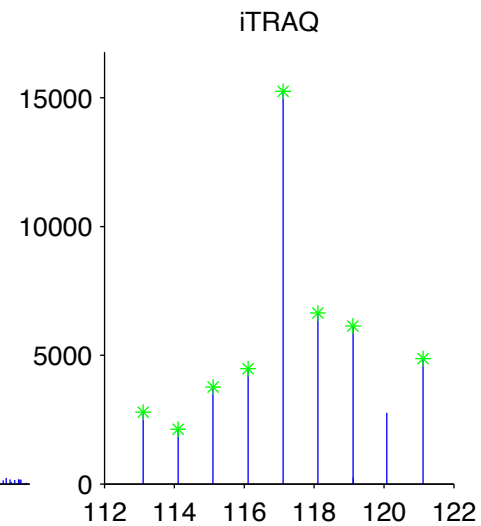

R[A]QIPEGDYLSyR

ERBB2 interacting protein isoform 2 [Homo sapiens]  
 Charge State: +3  
 Scan Number: 5654  
 File Name: HJ050711\_GBMxeno\_bio1\_E\_HANNAH.raw

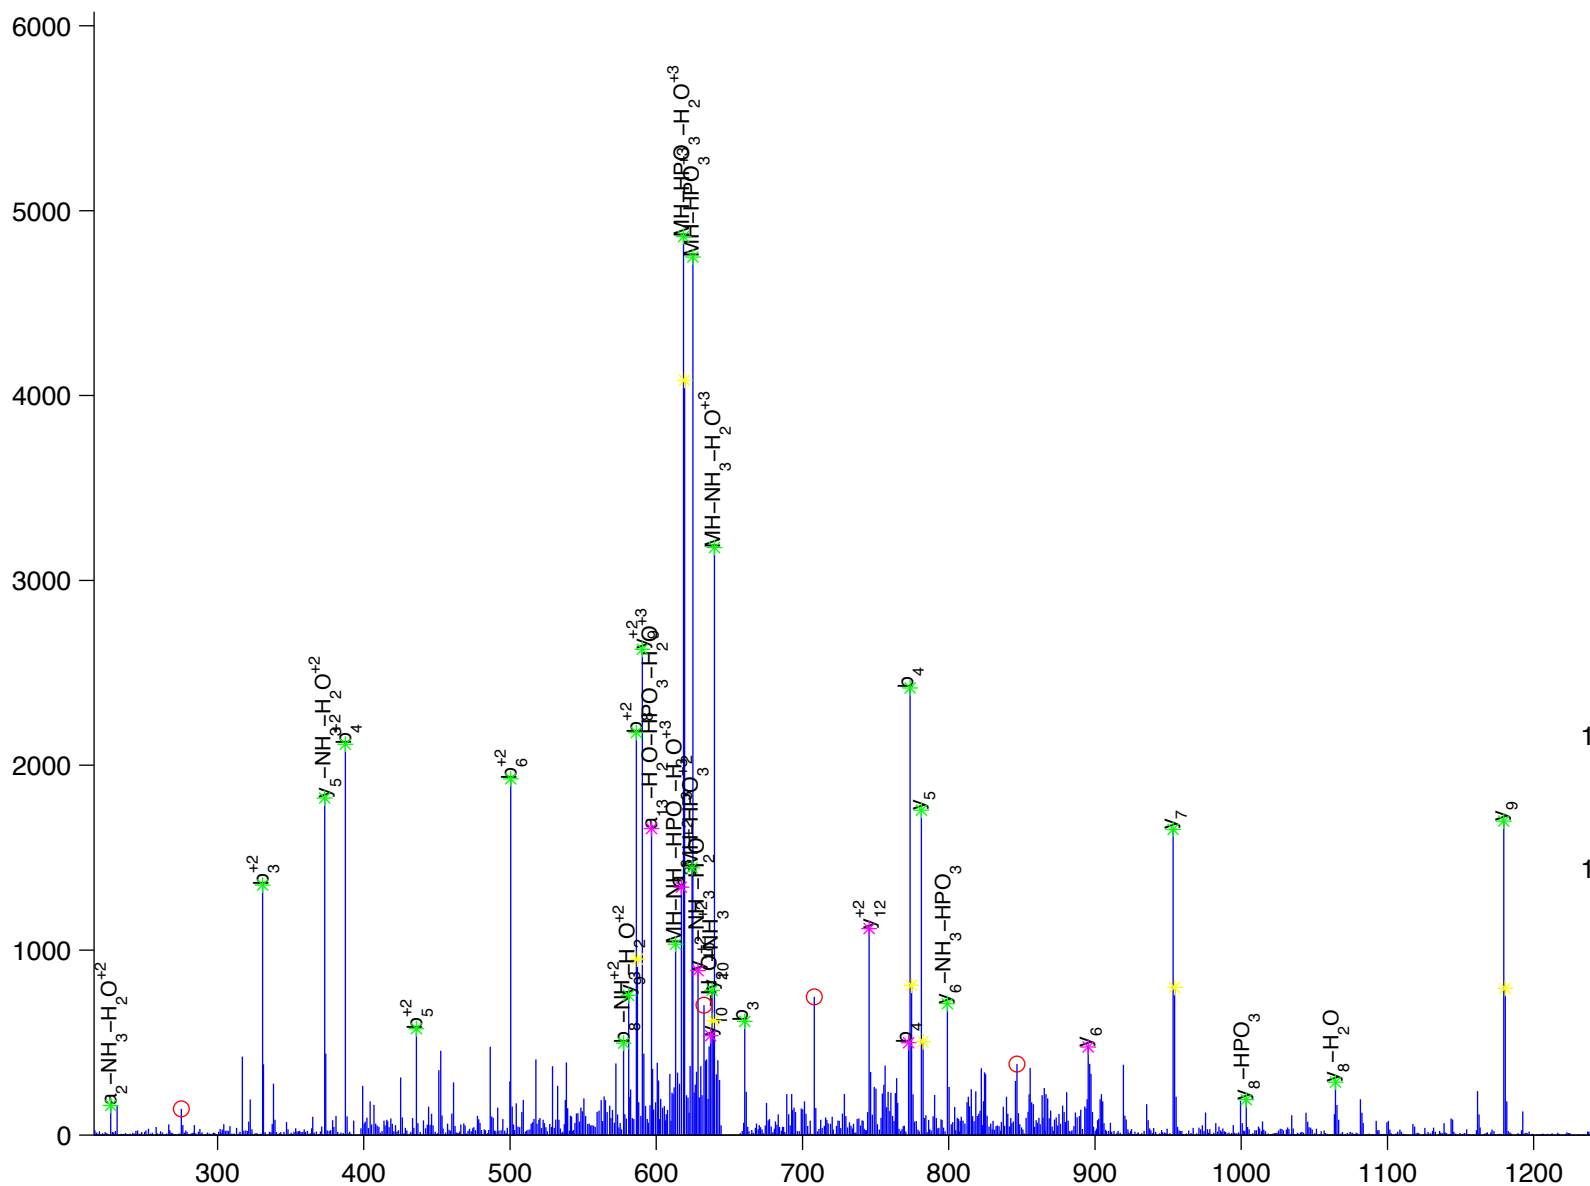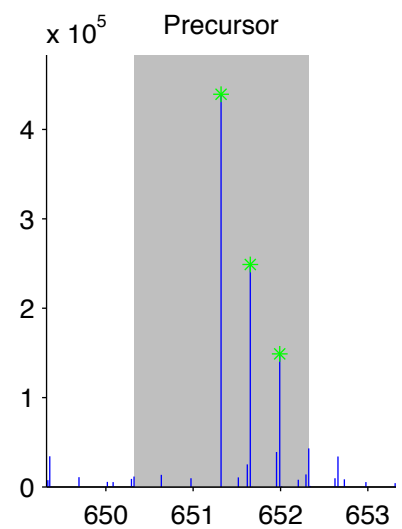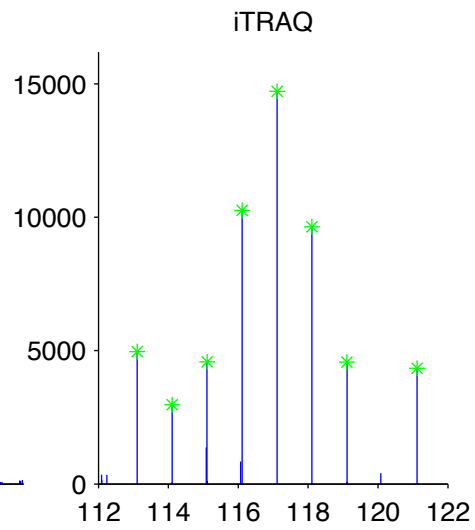

R[A]Q[I]P[E]G[D]Y[L]S[y]R

ERBB2 interacting protein isoform 2 [Homo sapiens]  
 Charge State: +2  
 Scan Number: 5668  
 File Name: HJ050711\_GBMxeno\_bio1\_E\_HANNAH.raw

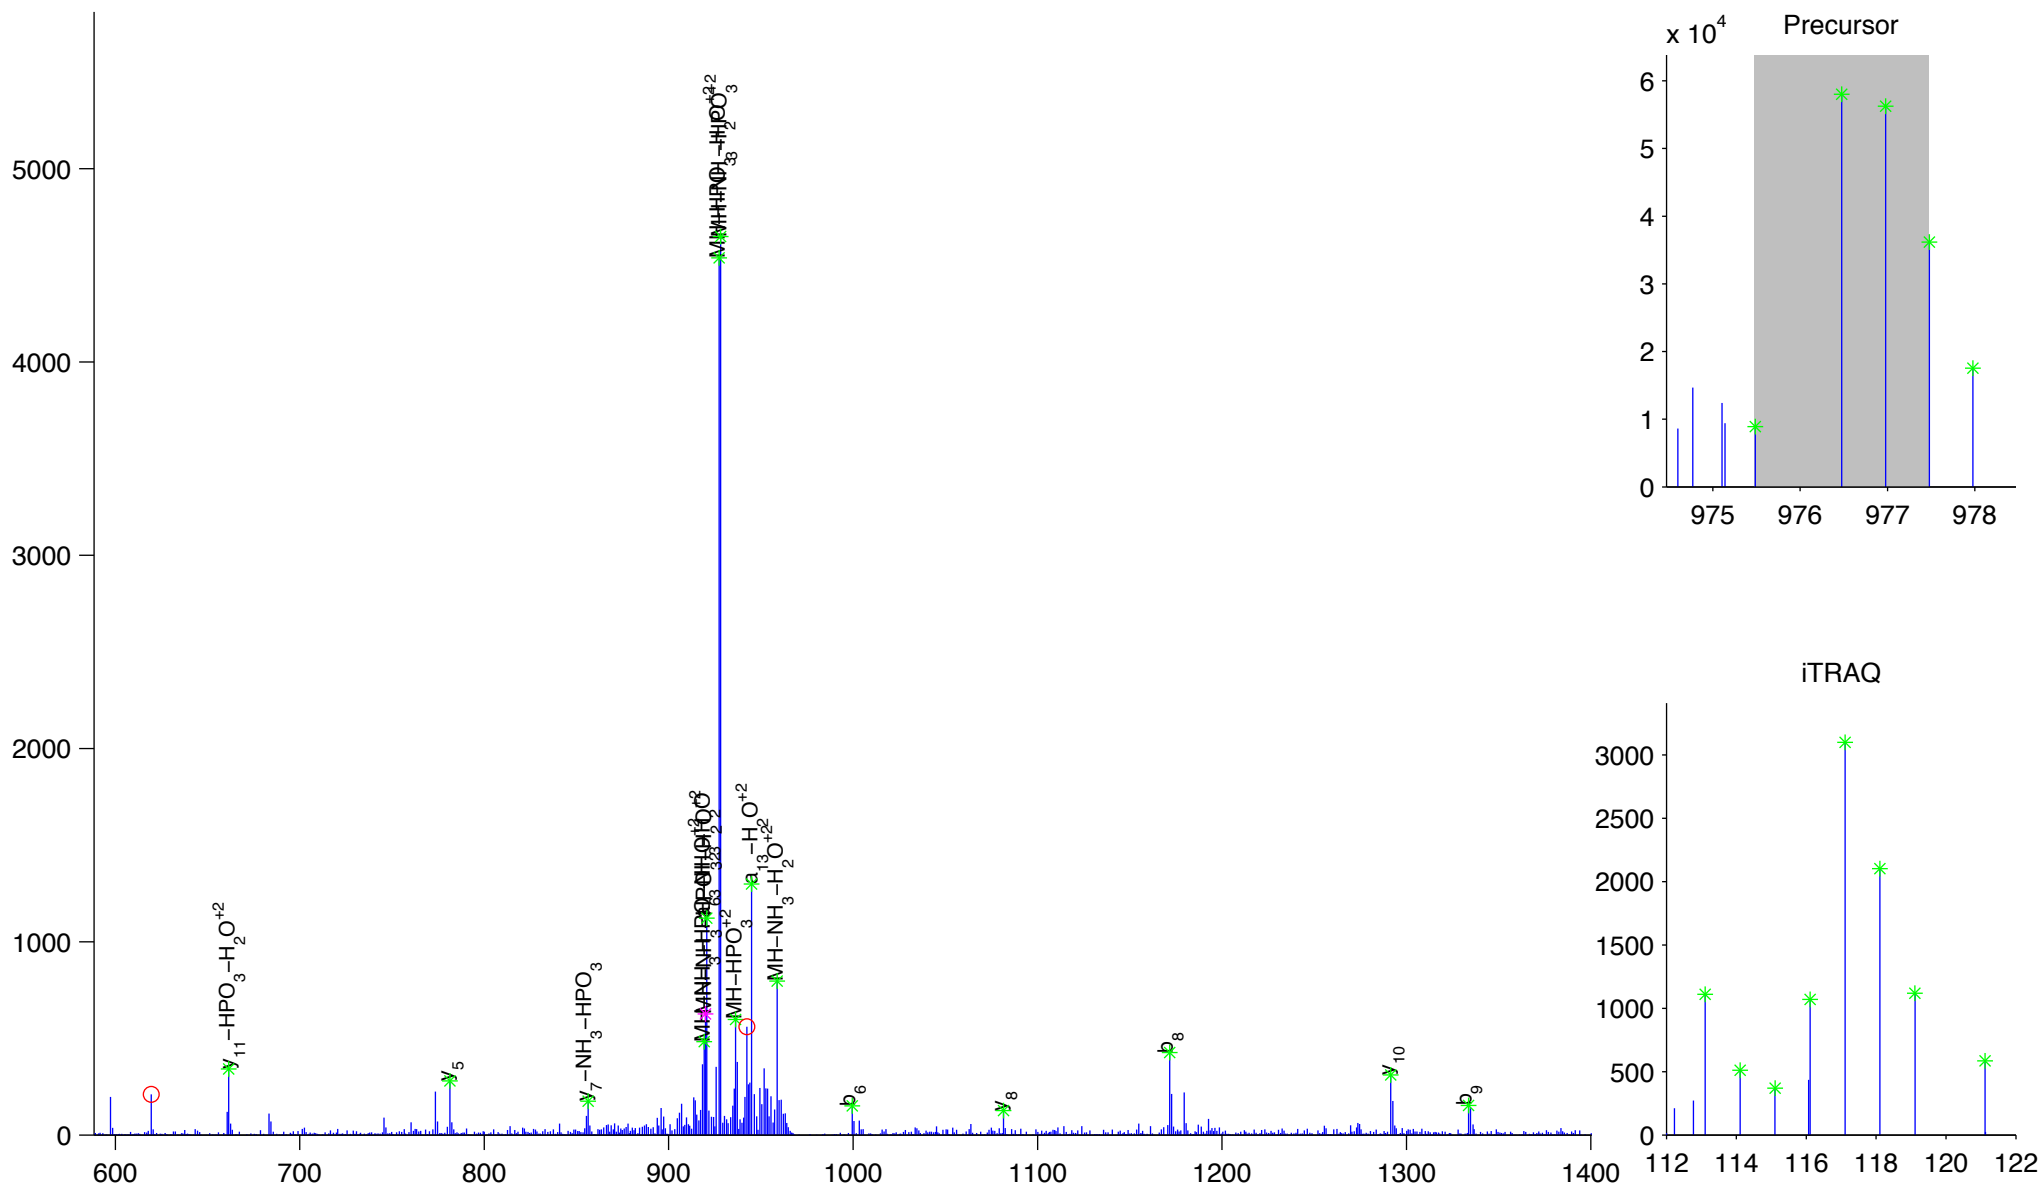

A [ Q ] [ I ] [ P ] [ E ] [ G ] [ D ] [ Y ] [ L ] [ S ] [ y ] [ R ]

ERBB2 interacting protein isoform 2 [Homo sapiens]  
 Charge State: +2  
 Scan Number: 6538  
 File Name: HJ050711\_GBMxeno\_bio1\_E\_HANNAH.raw

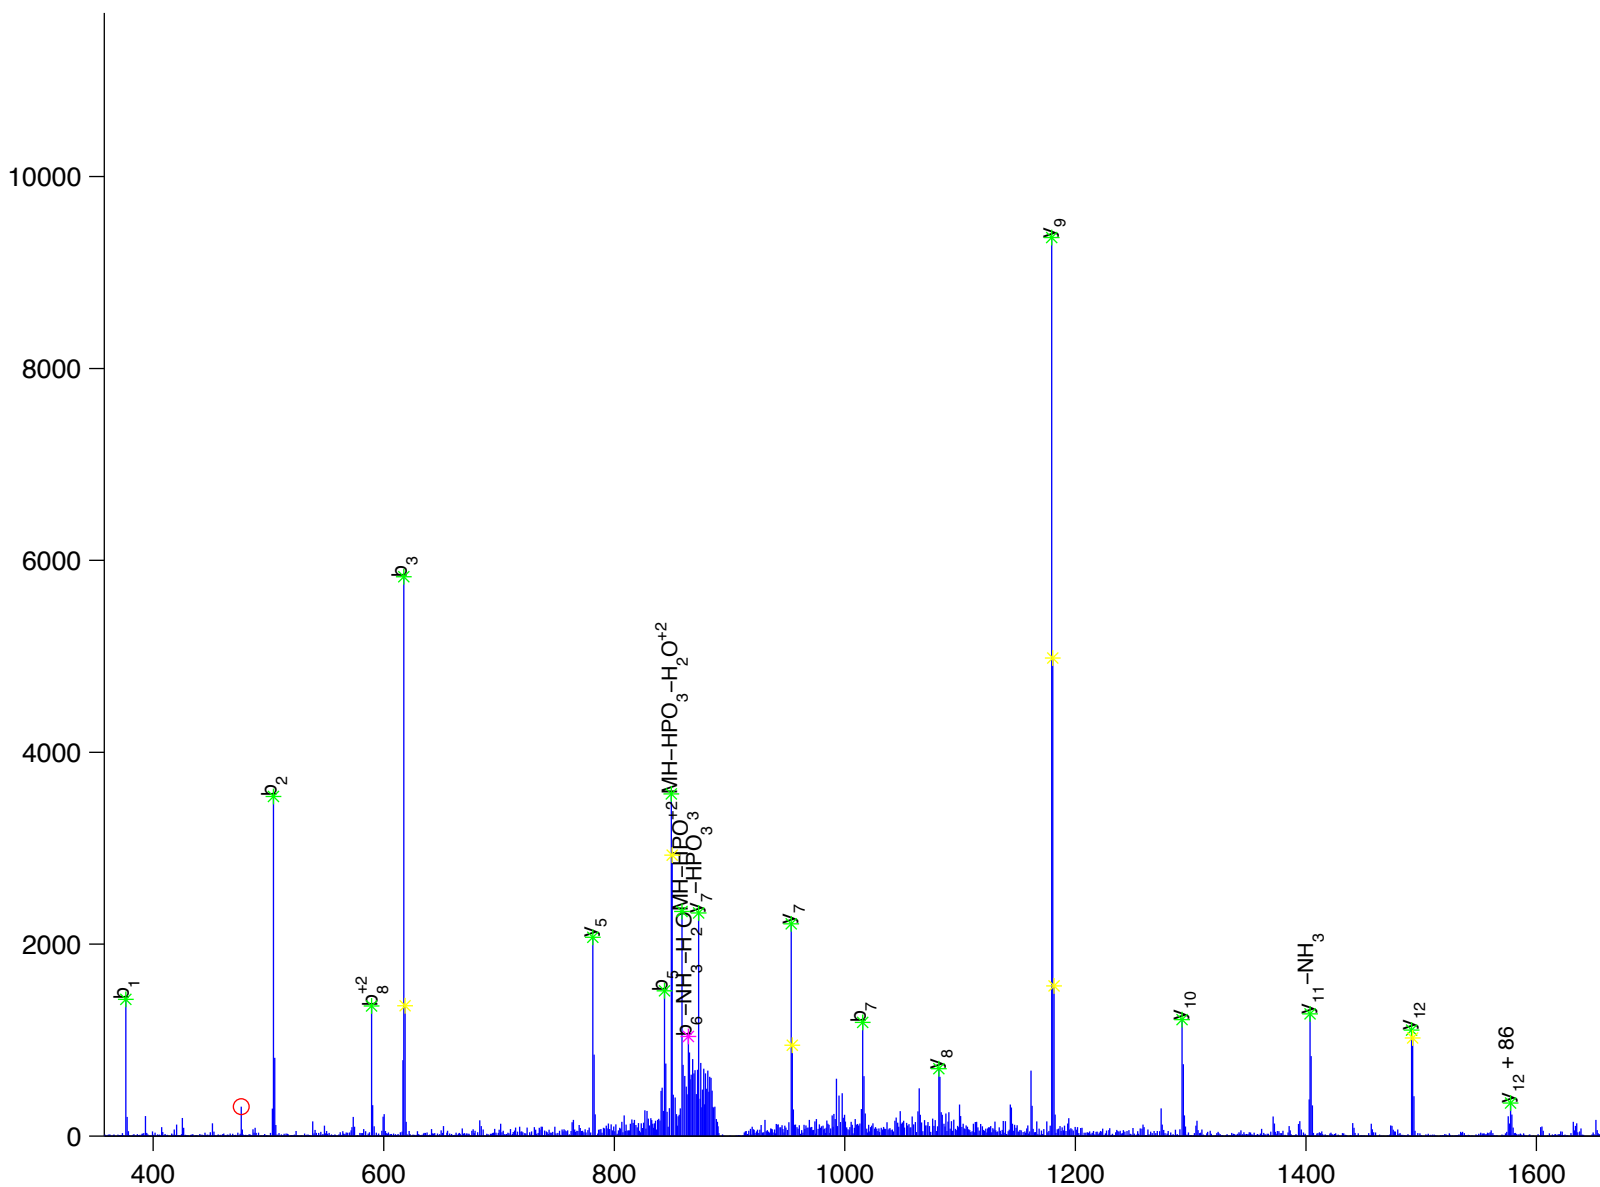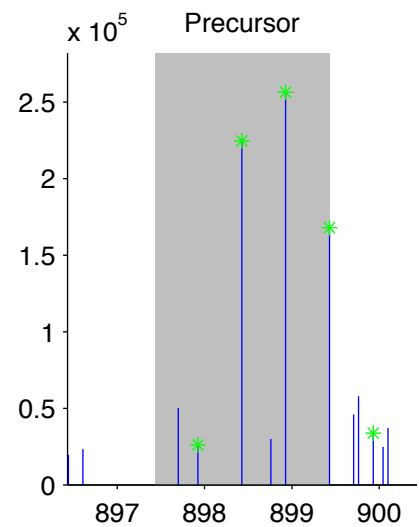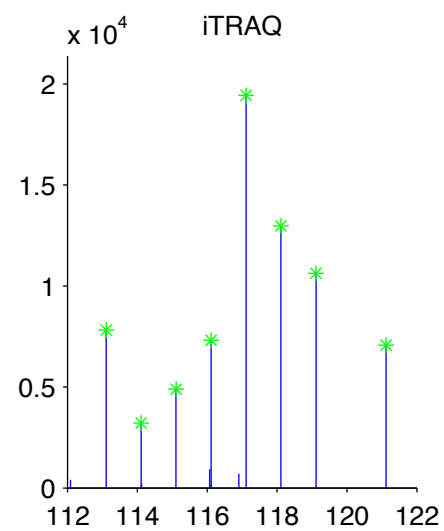

V E G D N I y V R

erythrocyte membrane protein band 4.1-like 2 [Homo sapiens]

Charge State: +3

Scan Number: 5633

File Name: HJ050711\_GBMxeno\_bio1\_E\_HANNAH.raw

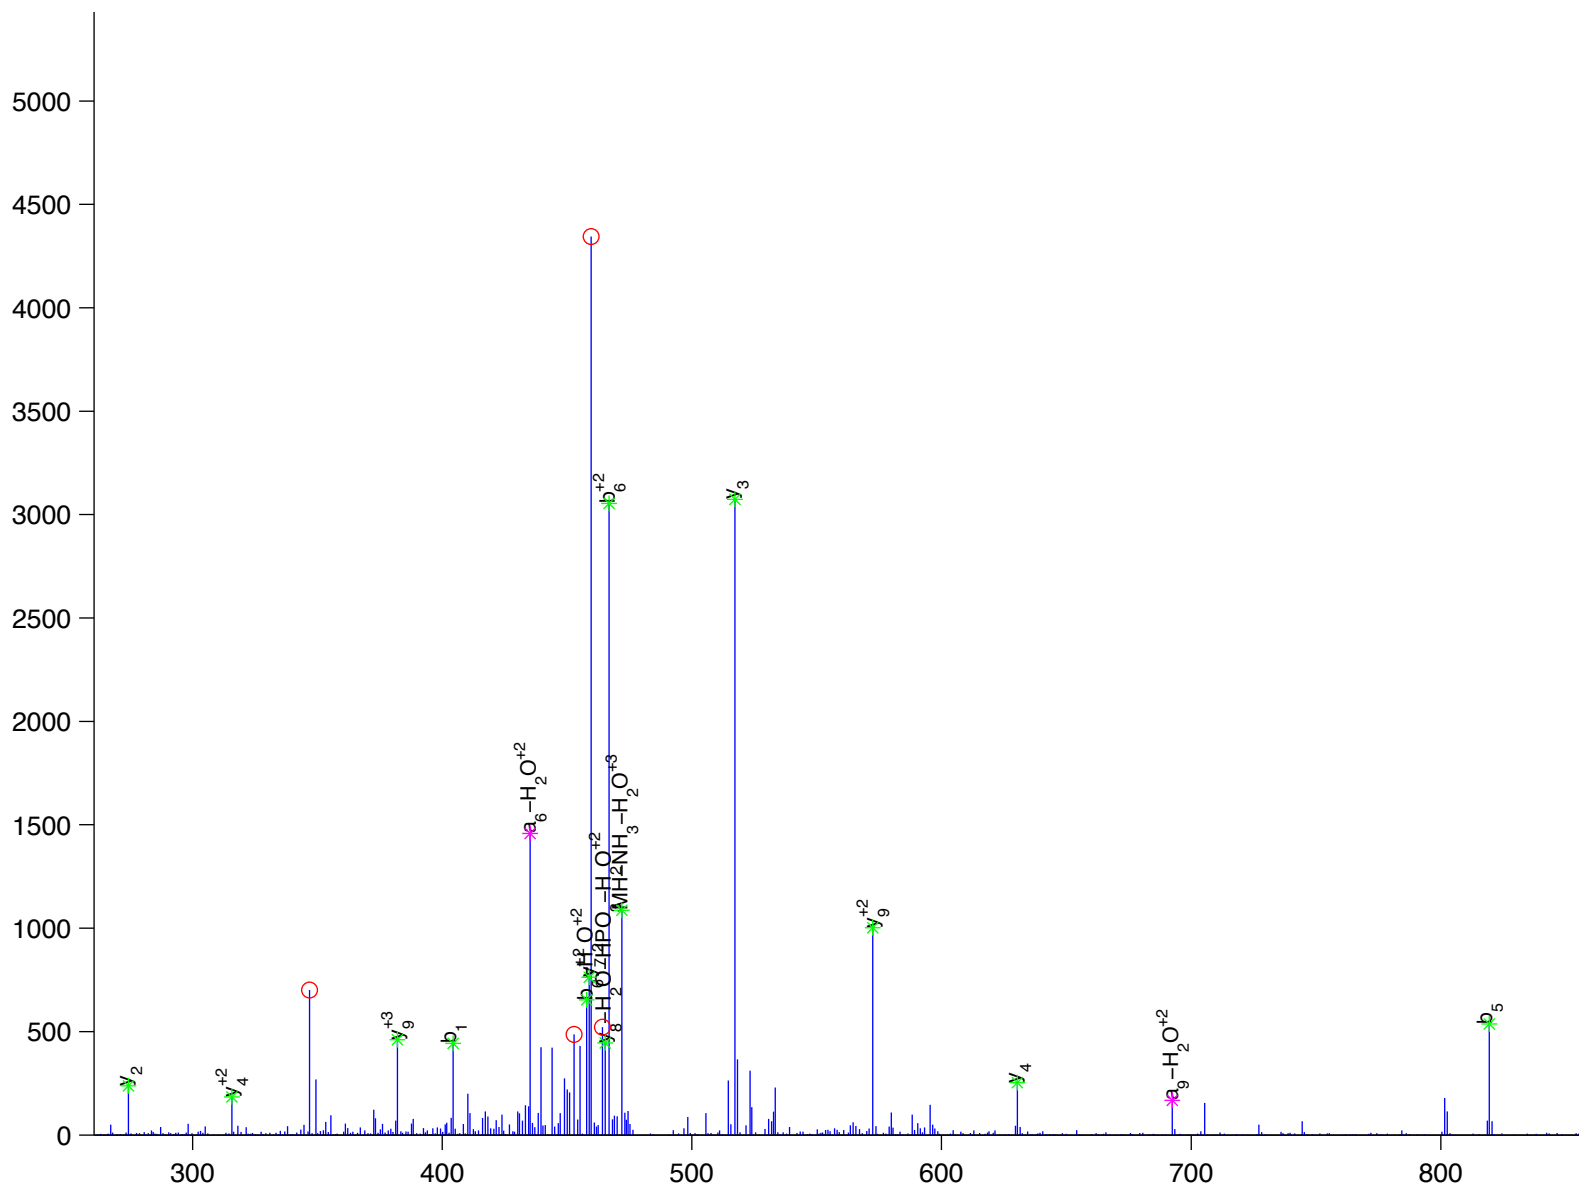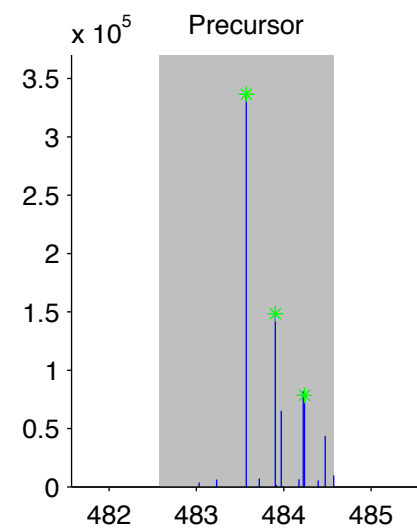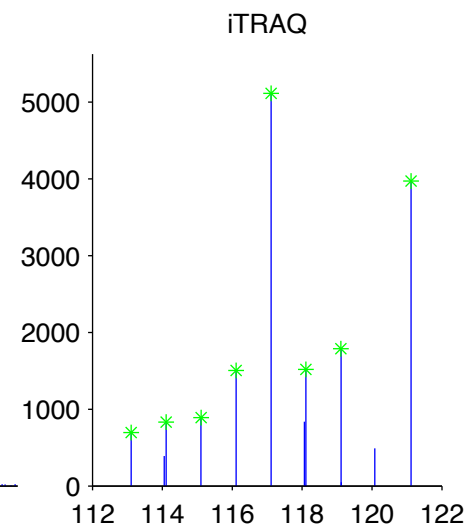



E [H] A [L] L [A] y [T] L [G] V [K]

eukaryotic translation elongation factor 1 alpha 1 [Homo sapiens]

Charge State: +3

Scan Number: 7846

File Name: HJ050711\_GBMxeno\_bio1\_E\_HANNAH.raw

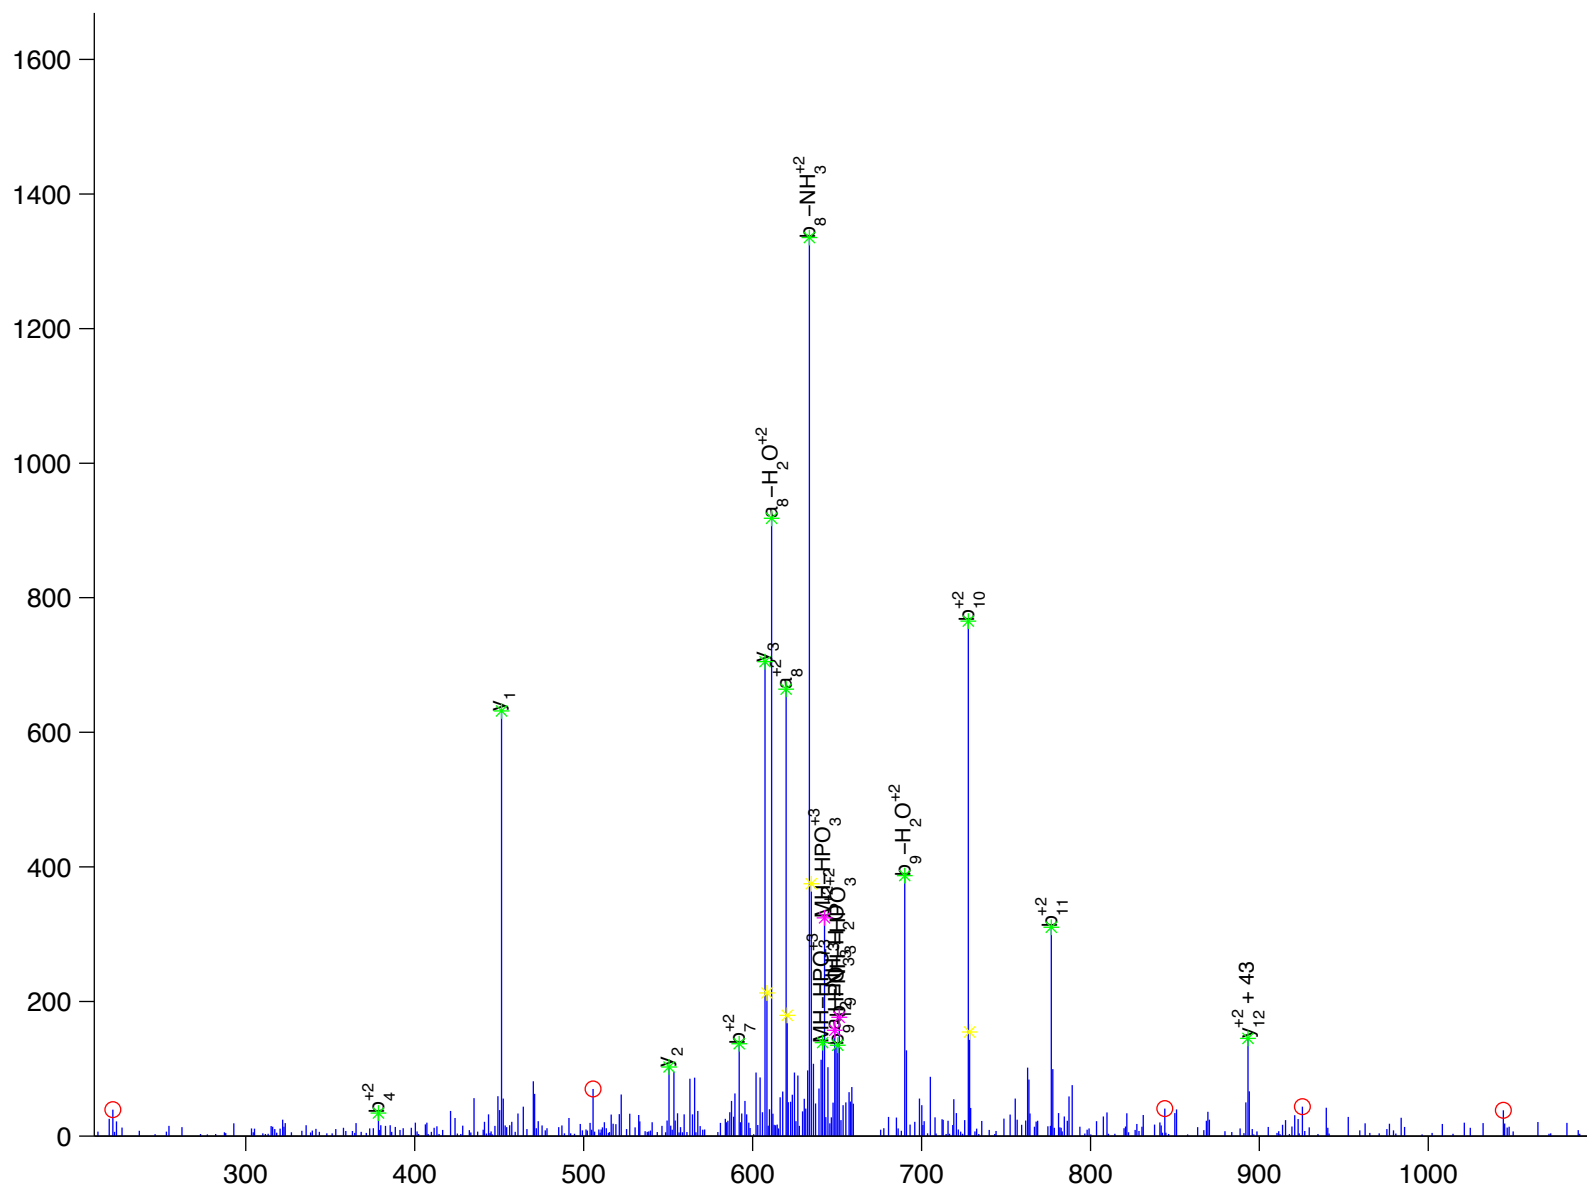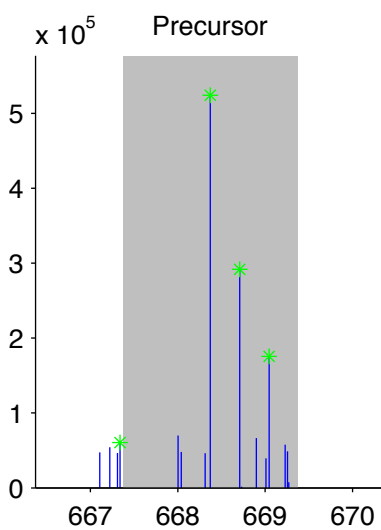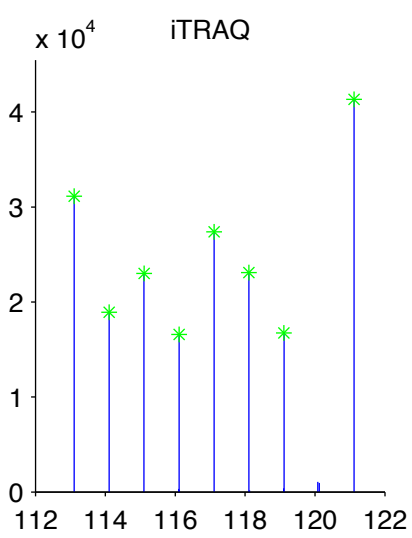

N[D]F[Q]L[I]G[I]Q[D]G[y]L[S]L[L]Q[D]S[G]E[V]R

eukaryotic translation initiation factor 5A [Homo sapiens]

Charge State: +3

Scan Number: 10001

File Name: HJ050711\_GBMxeno\_bio1\_E\_HANNAH.raw

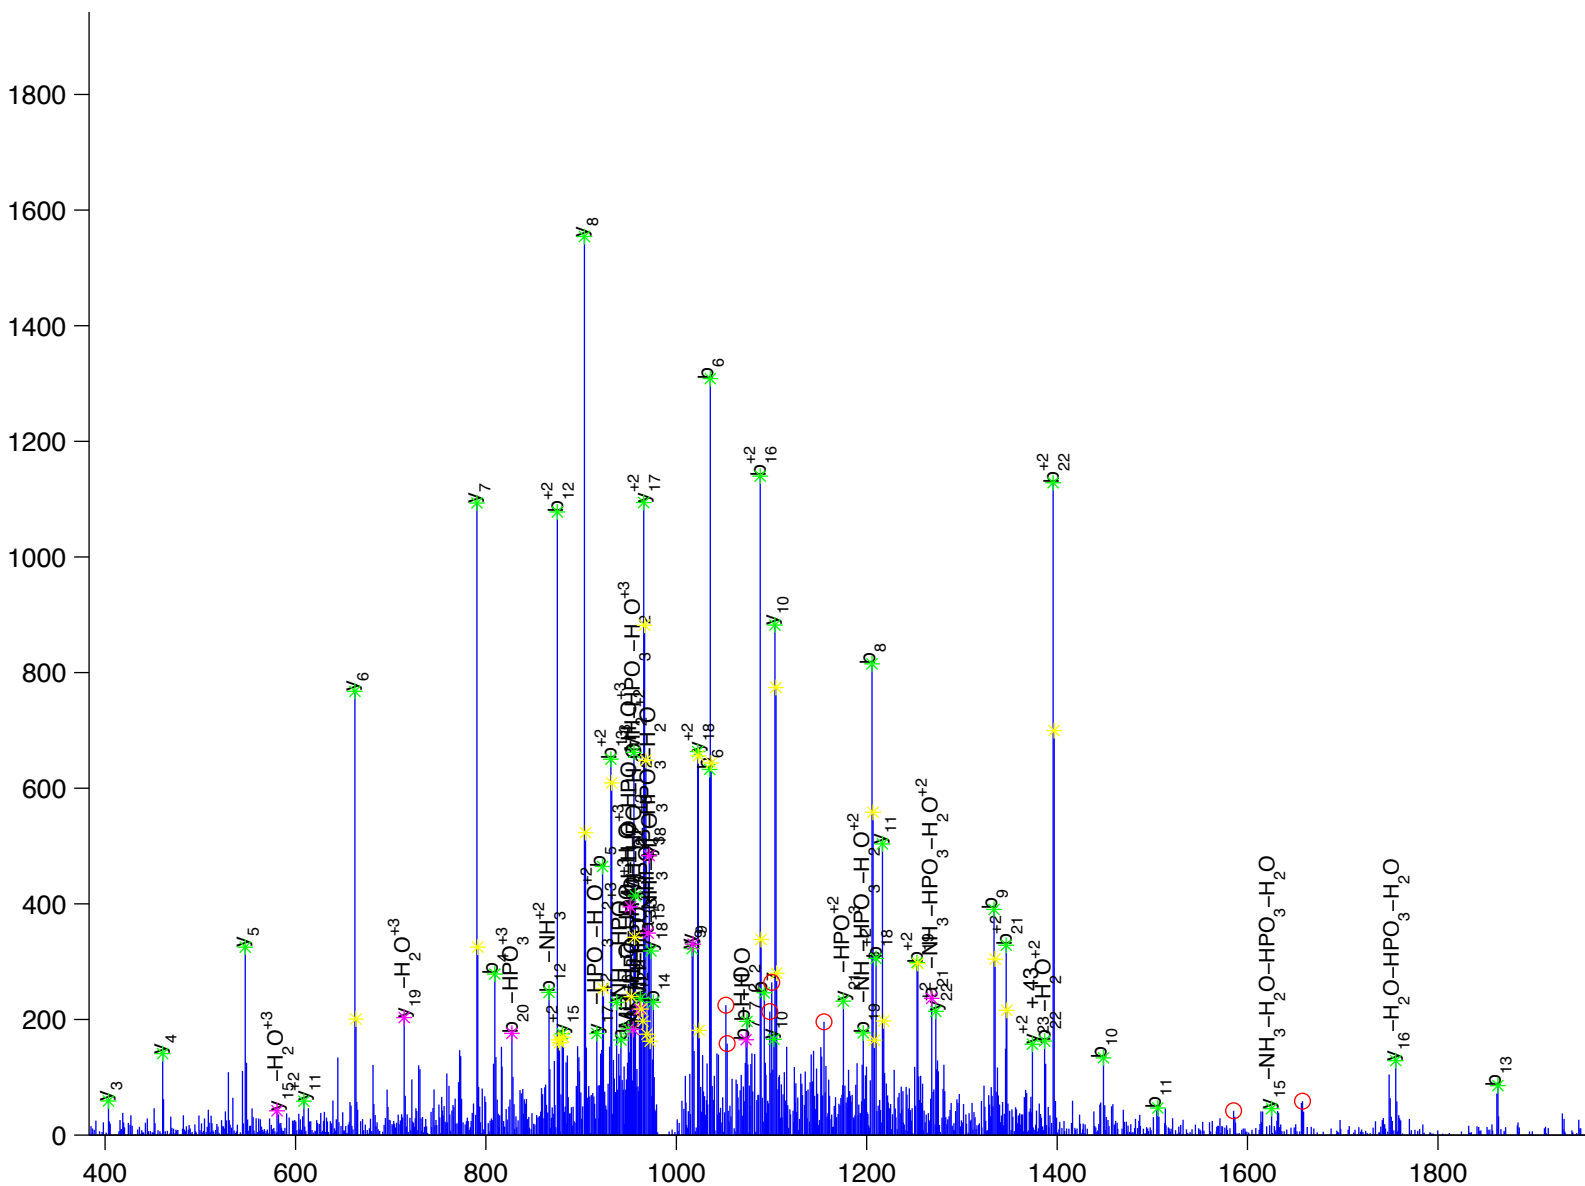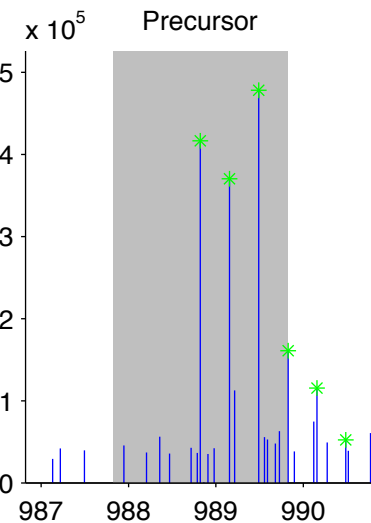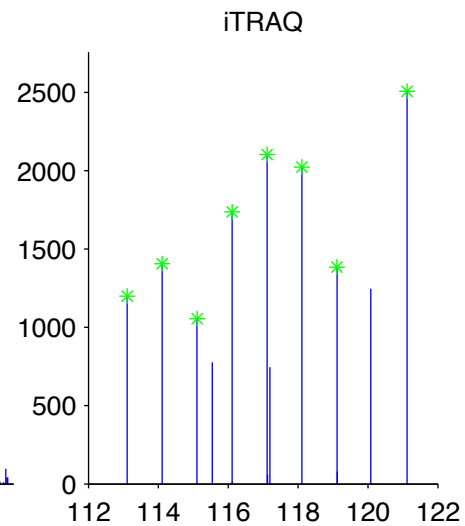

Q [ E ] [ D ] [ G ] [ G ] [ V ] [ y ] [ S ] [ S ] [ S ] [ G ] [ L ] [ K ]

fer (fps/fes related) tyrosine kinase [Homo sapiens]

Charge State: +2

Scan Number: 4278

File Name: HJ050711\_GBMxeno\_bio1\_E\_HANNAH.raw

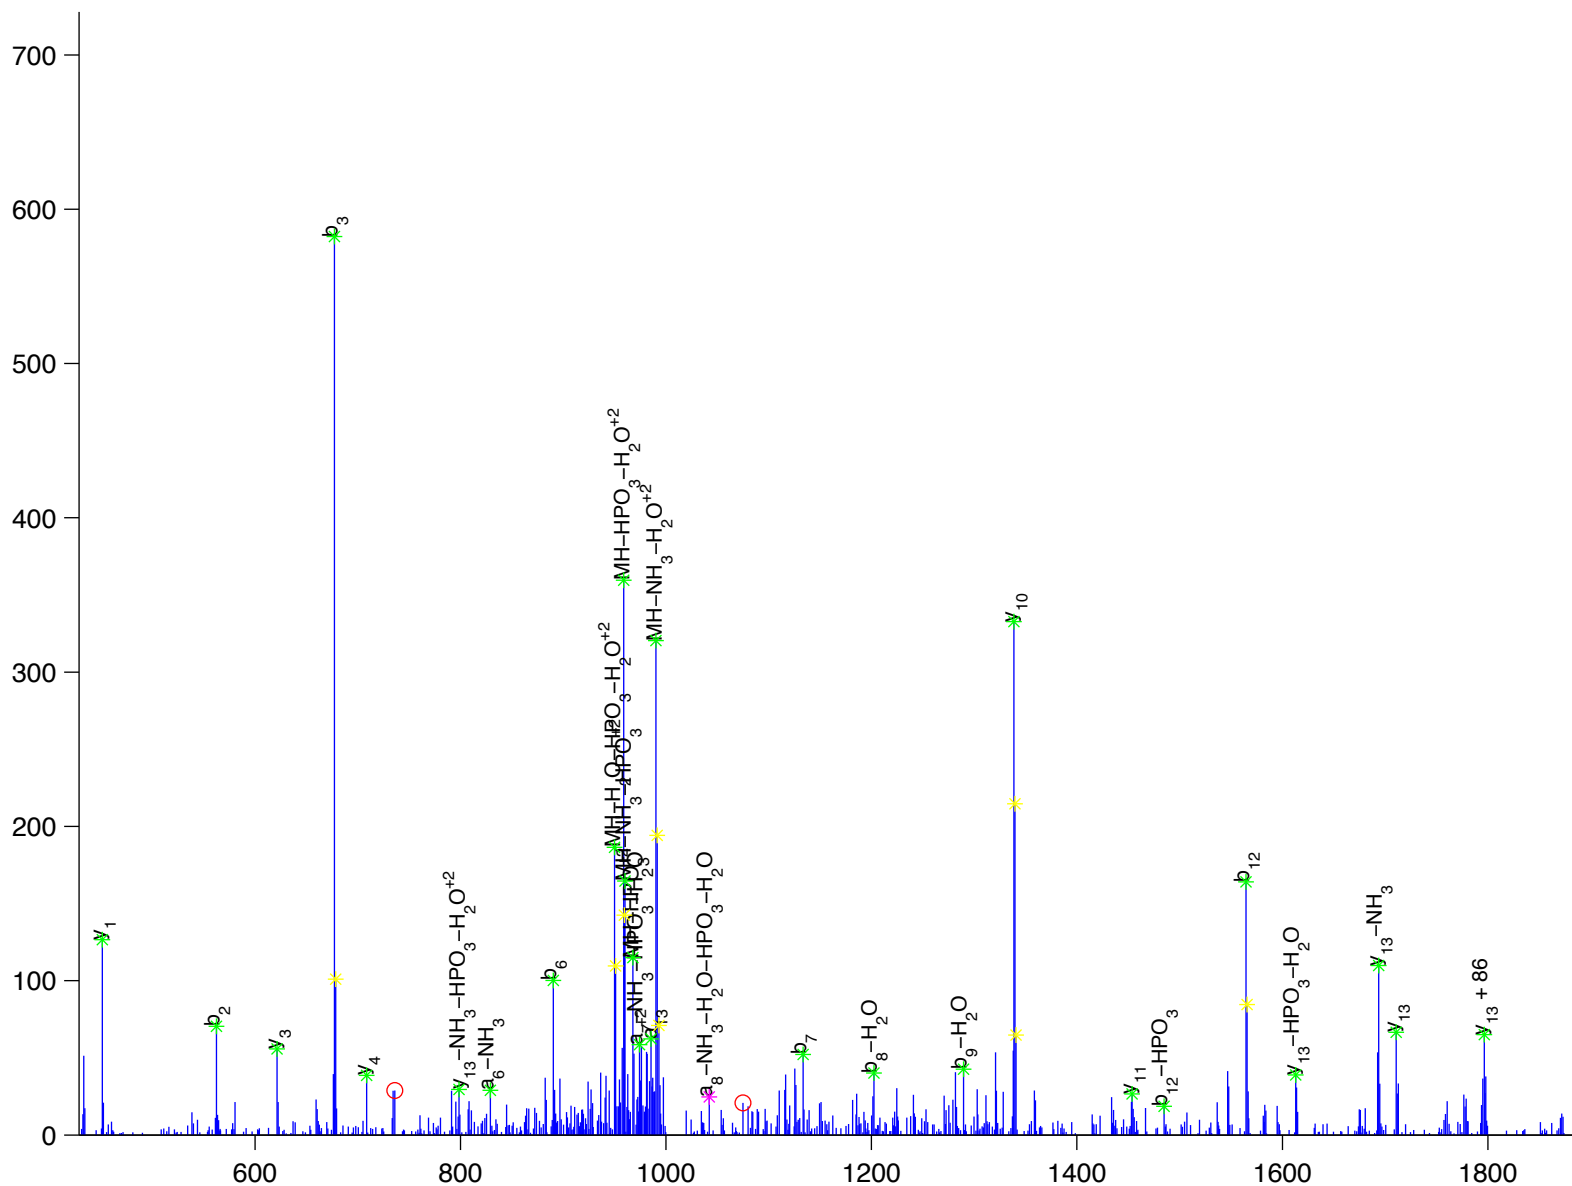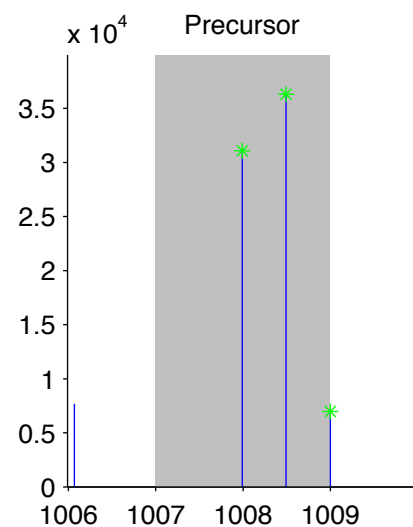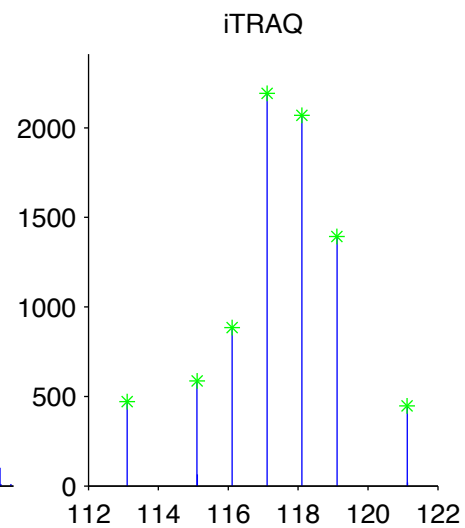

Q[E]D[G]G[V]y[S]S[S]G[L]K

fer (fps/fes related) tyrosine kinase [Homo sapiens]

Charge State: +3

Scan Number: 4354

File Name: HJ050711\_GBMxeno\_bio1\_E\_HANNAH.raw

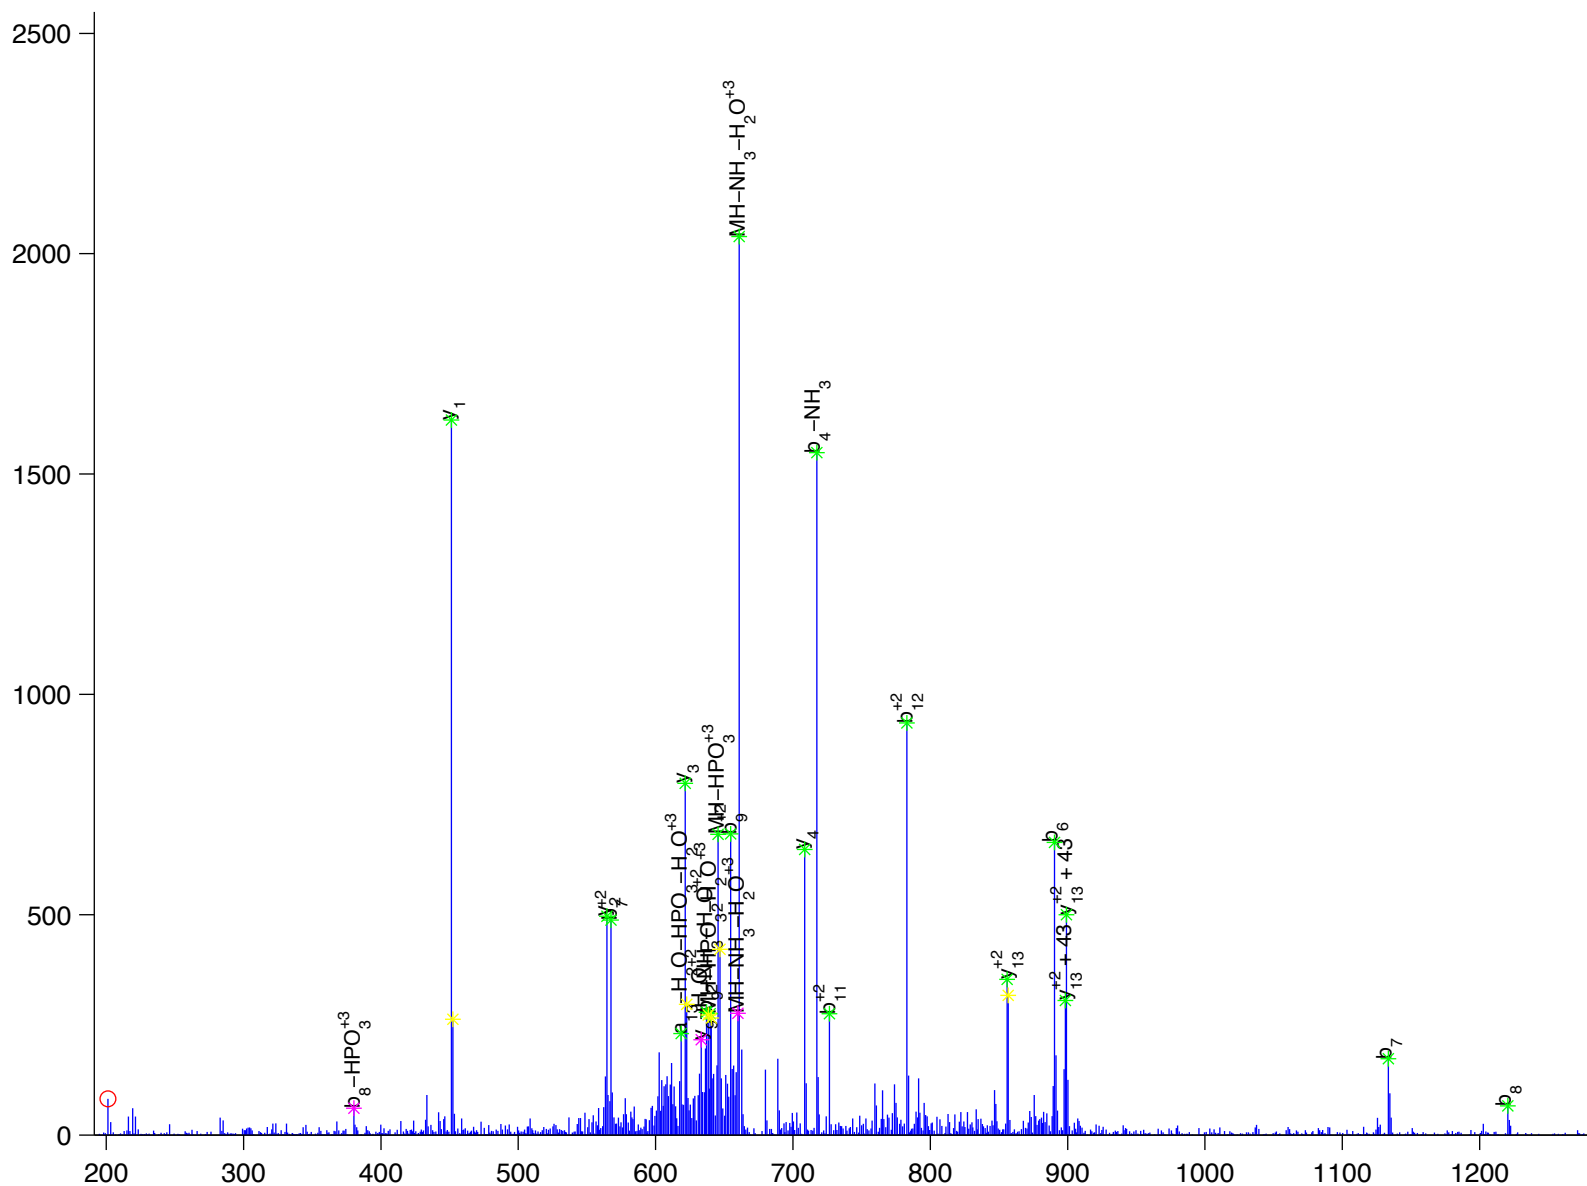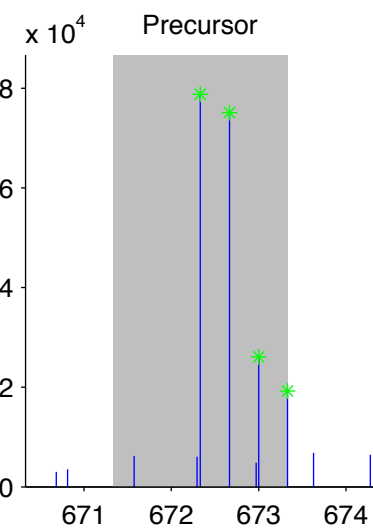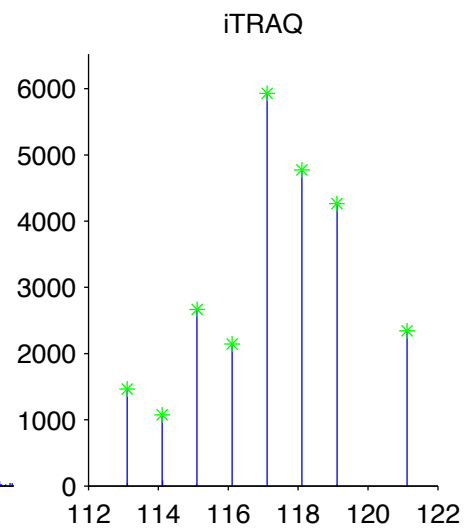

E T A I E L G y L T A E Q F D E W V K P K

fumarate hydratase precursor [Homo sapiens]

Charge State: +4

Scan Number: 10041

File Name: HJ050711\_GBMxeno\_bio1\_E\_HANNAH.raw

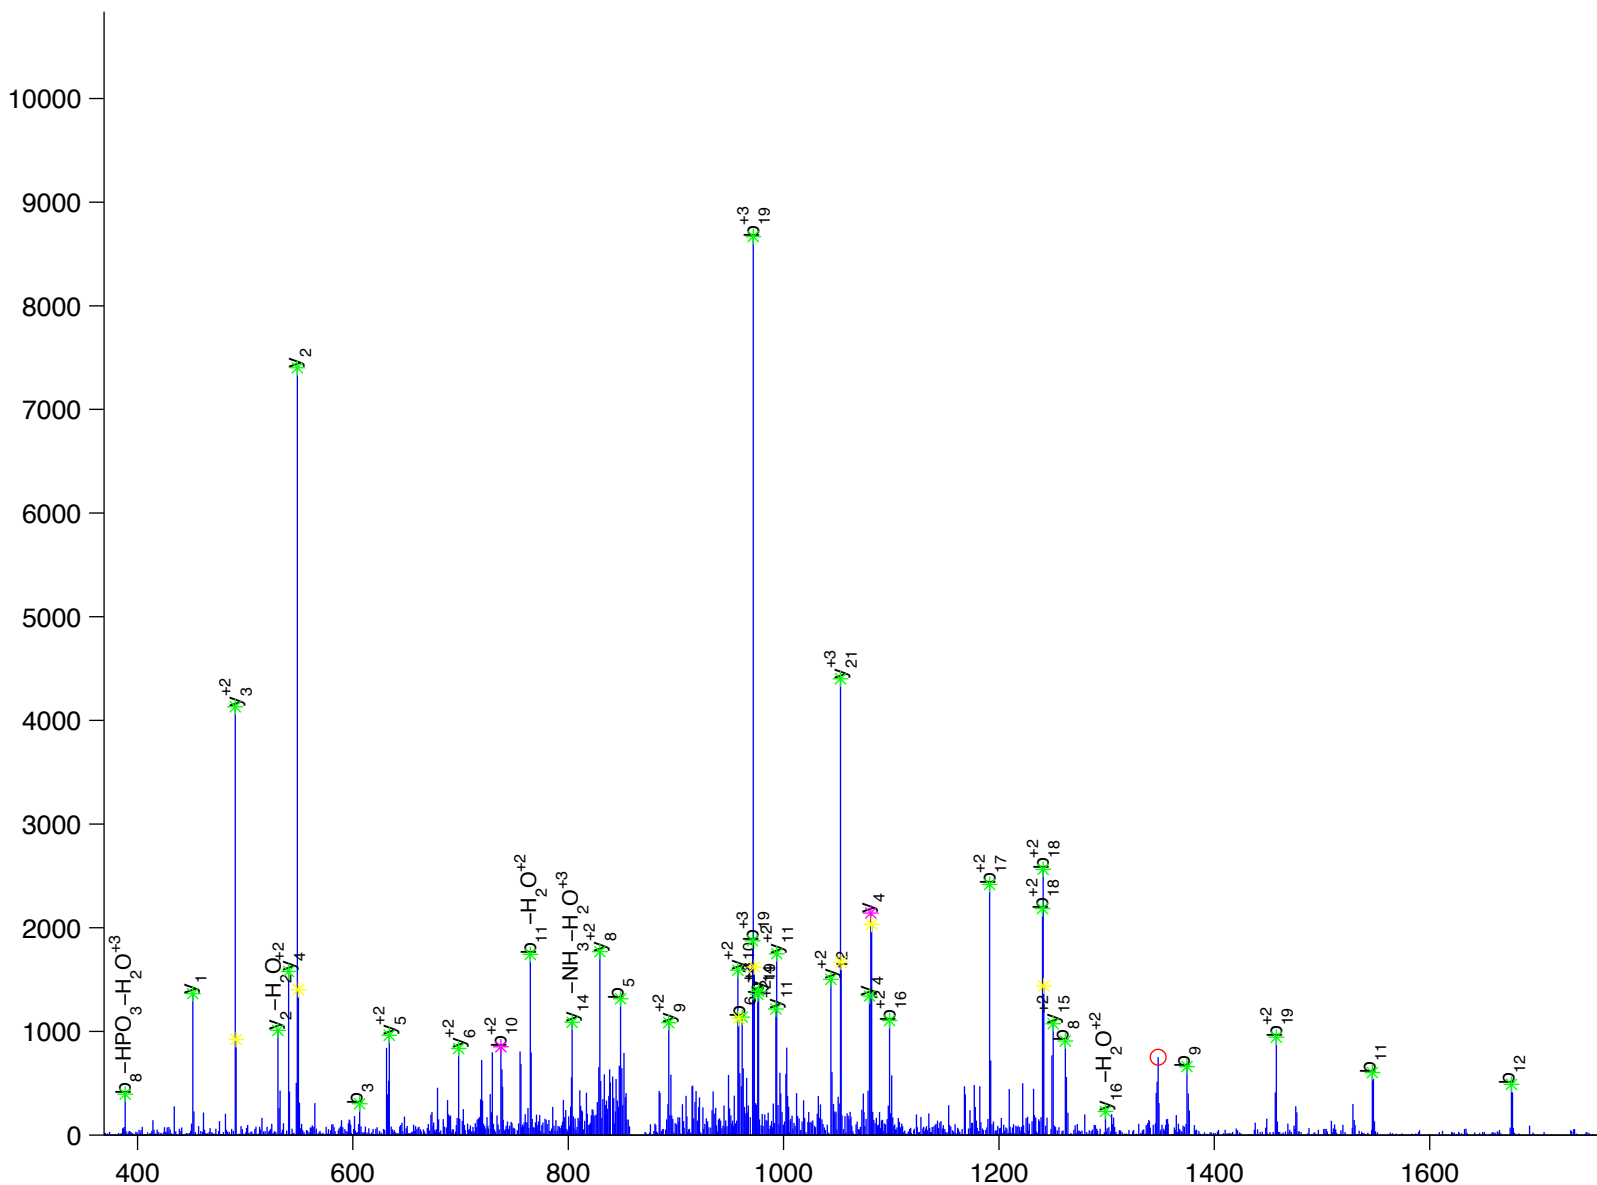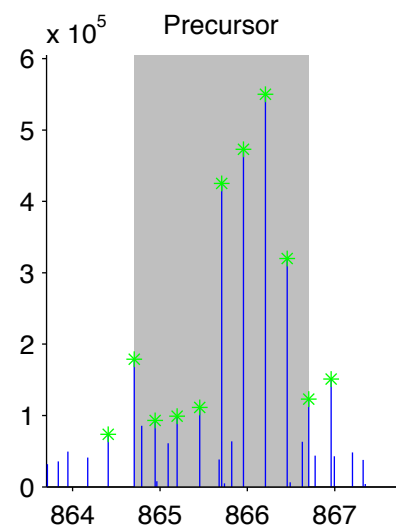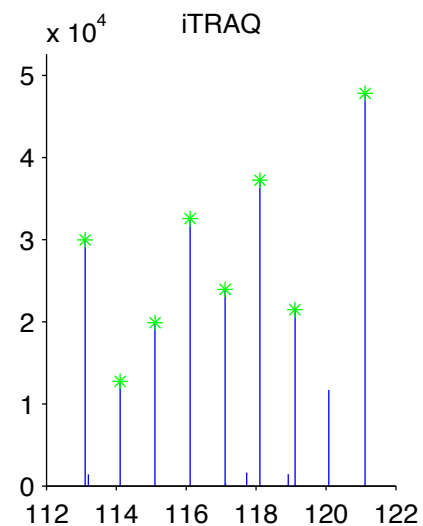

T T A V E I D y D S L K

FYN binding protein (FYB-120/130) isoform 2 [Homo sapiens]  
 Charge State: +3  
 Scan Number: 6937  
 File Name: HJ050711\_GBMxeno\_bio1\_E\_HANNAH.raw

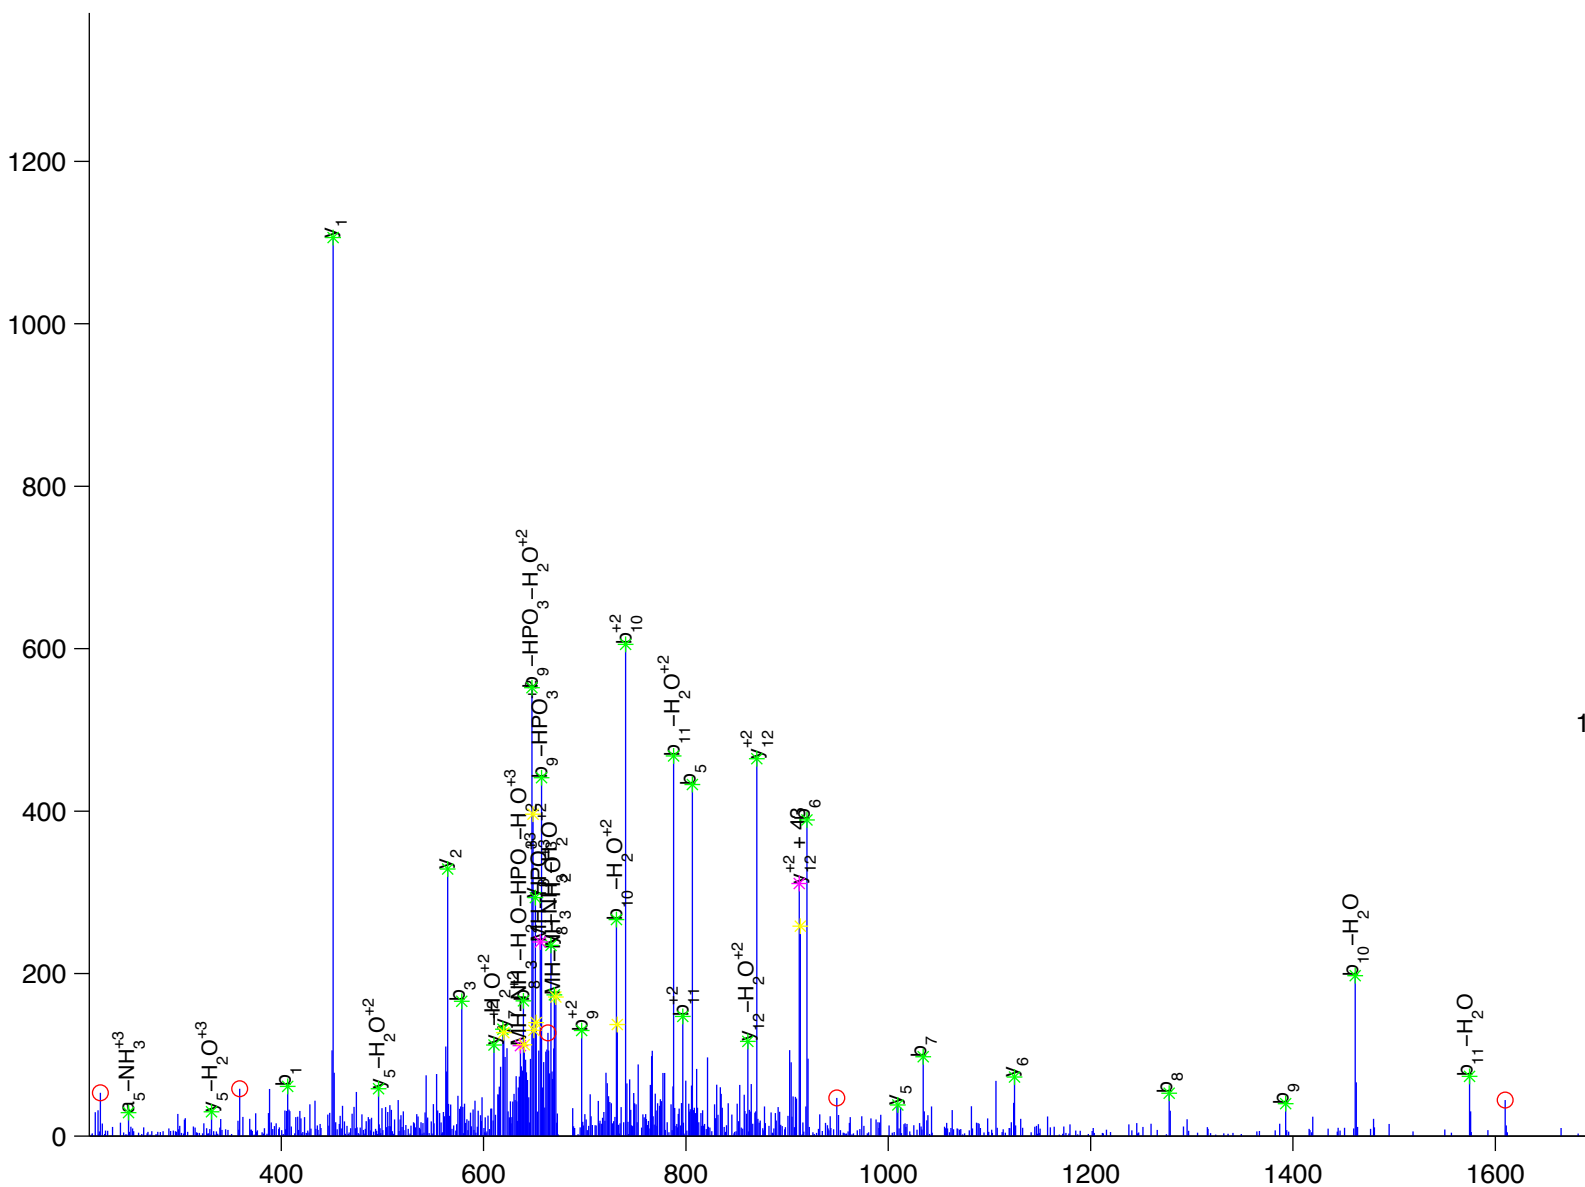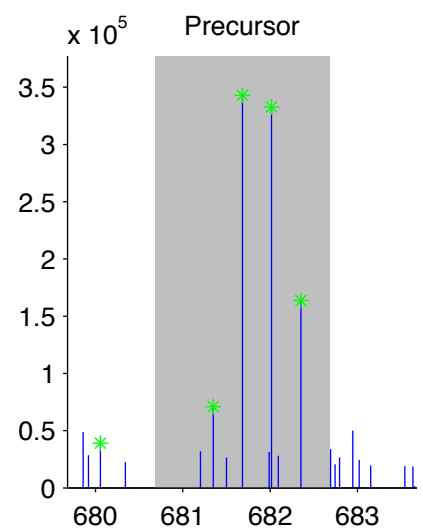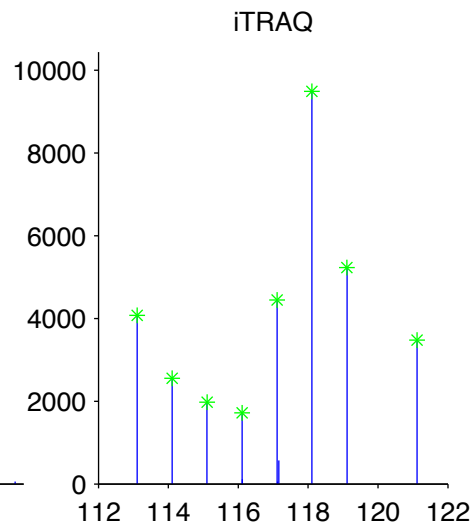

y  
 [ I ]  
 [ E ]  
 [ L ]  
 [ F ]  
 [ L ]  
 [ N ]  
 [ s ]  
 [ c ]  
 [ P ]  
 K

G-rich RNA sequence binding factor 1 isoform 2 [Homo sapiens]

Charge State: +2

Scan Number: 10253

File Name: HJ050711\_GBMxeno\_bio1\_E\_HANNAH.raw

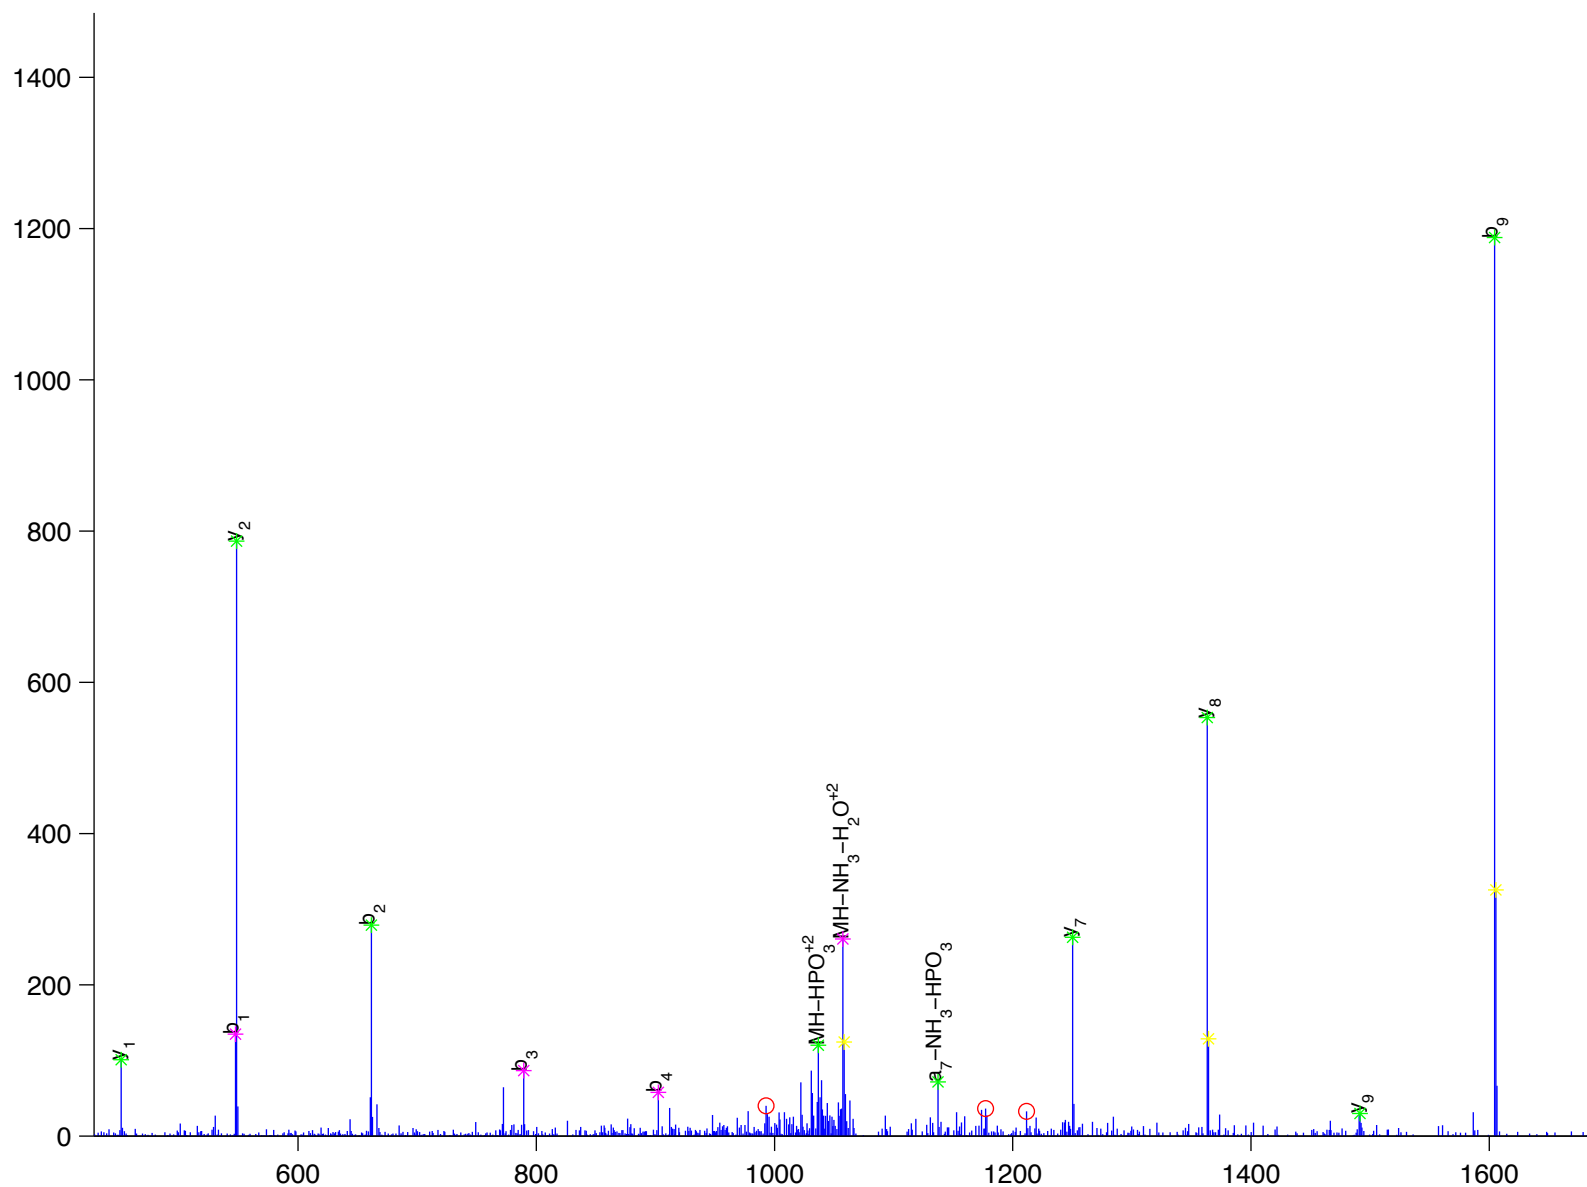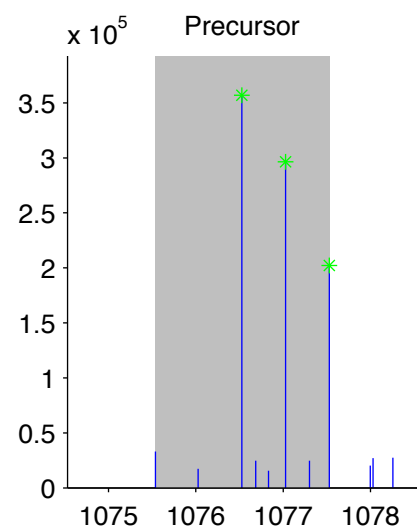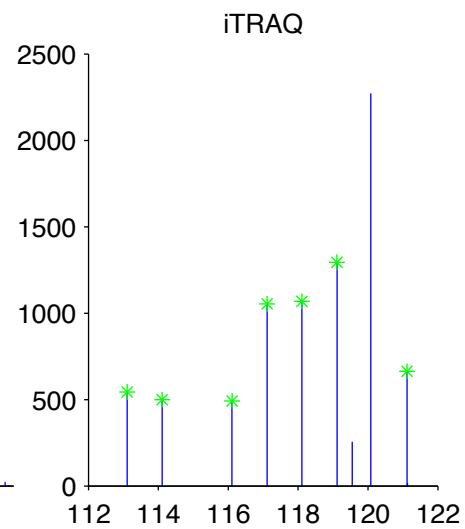

V [D] y V [Q] V [D] E [Q] K

Gab3 protein isoform 2 [Homo sapiens]

Charge State: +2

Scan Number: 5750

File Name: HJ050711\_GBMxeno\_bio1\_E\_HANNAH.raw

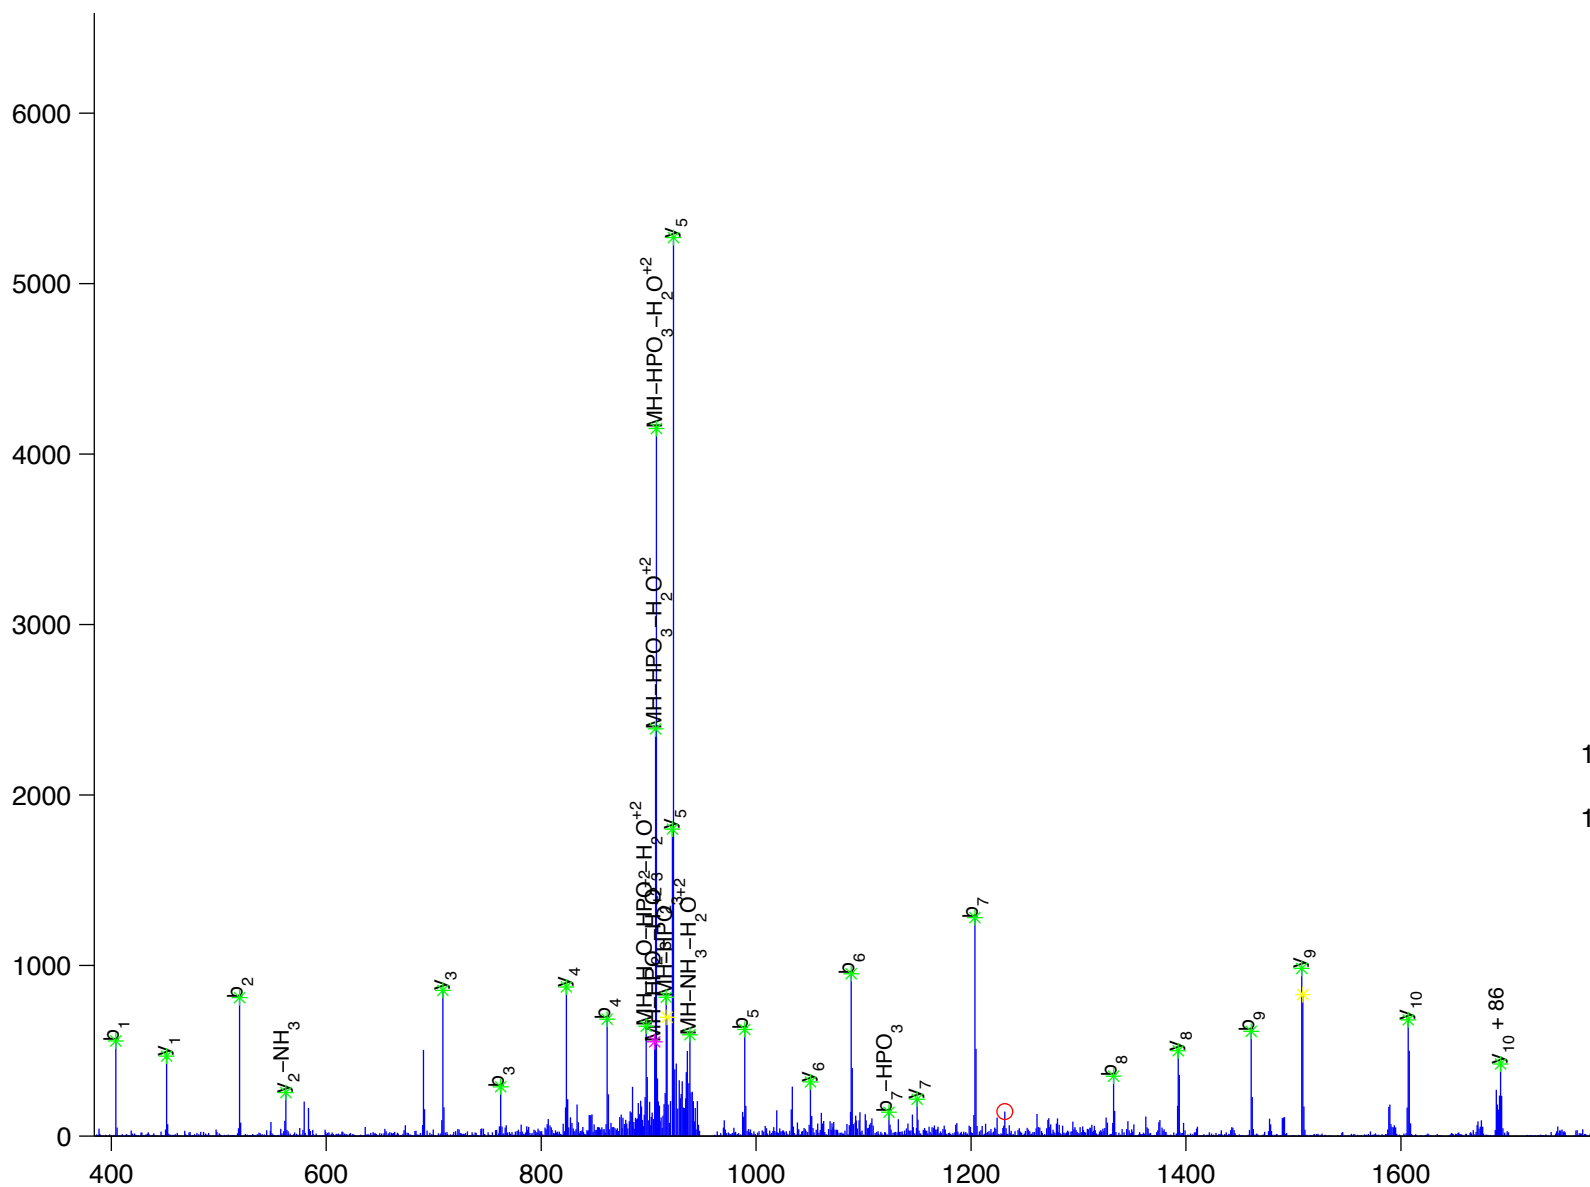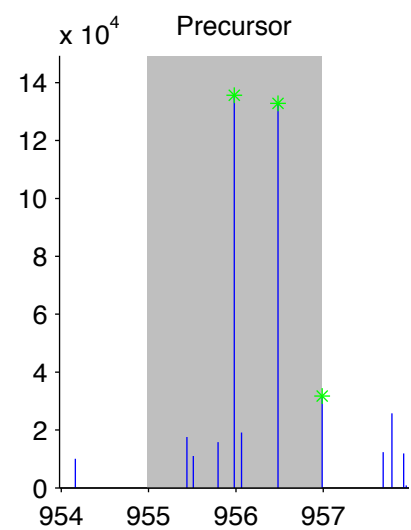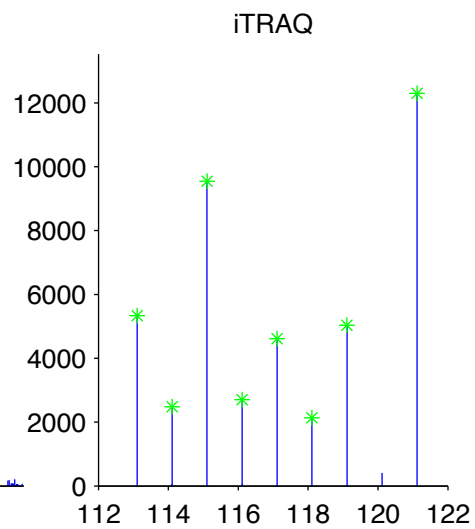



S[V]S[S]S[P]W[L]P[Q]D[G]F[D]P[S]D[y]A[E]P[M]D[A]V[V]K[P]R

glucocorticoid receptor DNA binding factor 1 [Homo sapiens]

Charge State: +4

Scan Number: 8739

File Name: HJ050711\_GBMxeno\_bio1\_E\_HANNAH.raw

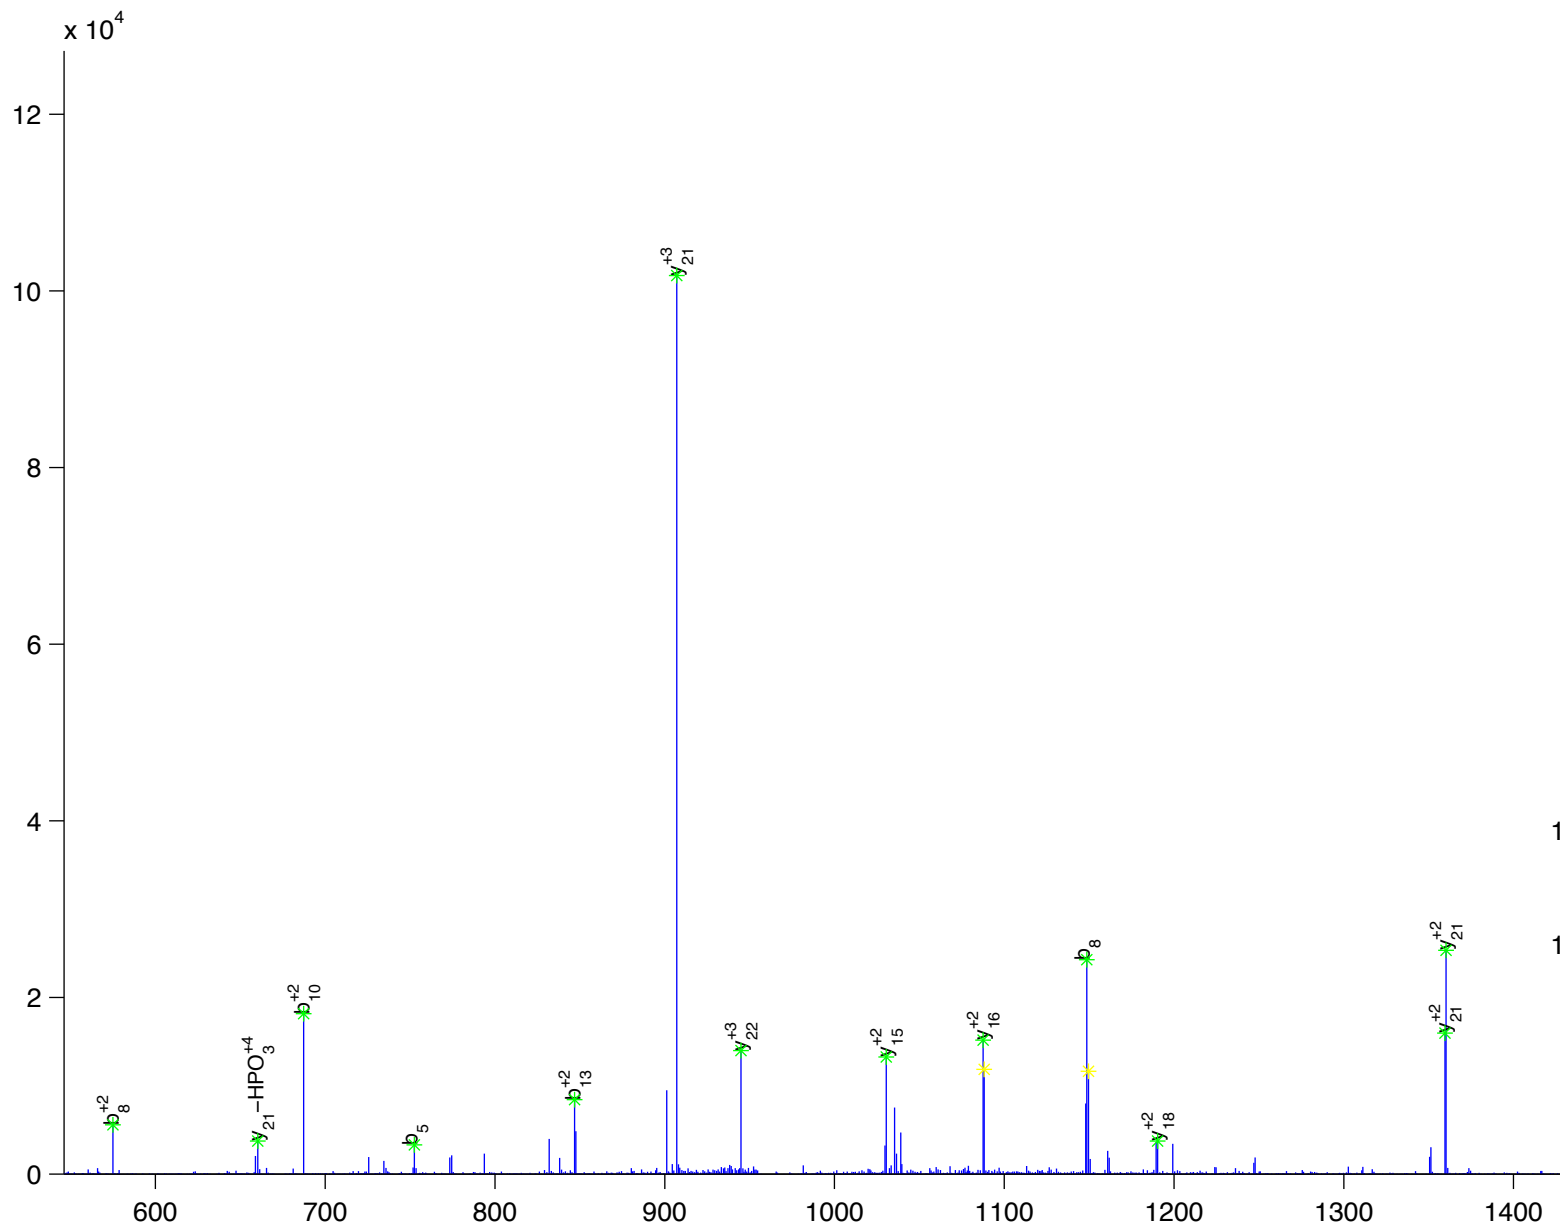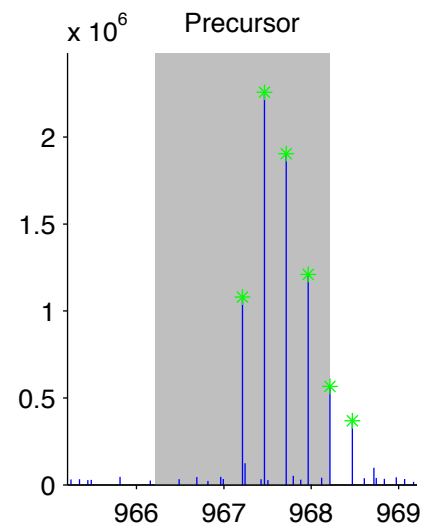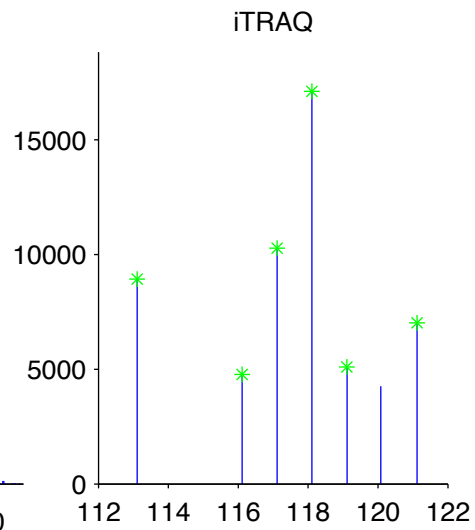

S[V]S[S]S[P]W[L]P[Q]D[G]F[D]P[S]D[y]A[E]P[M]D[A]V[V]K[P]R

glucocorticoid receptor DNA binding factor 1 [Homo sapiens]

Charge State: +3

Scan Number: 8741

File Name: HJ050711\_GBMxeno\_bio1\_E\_HANNAH.raw

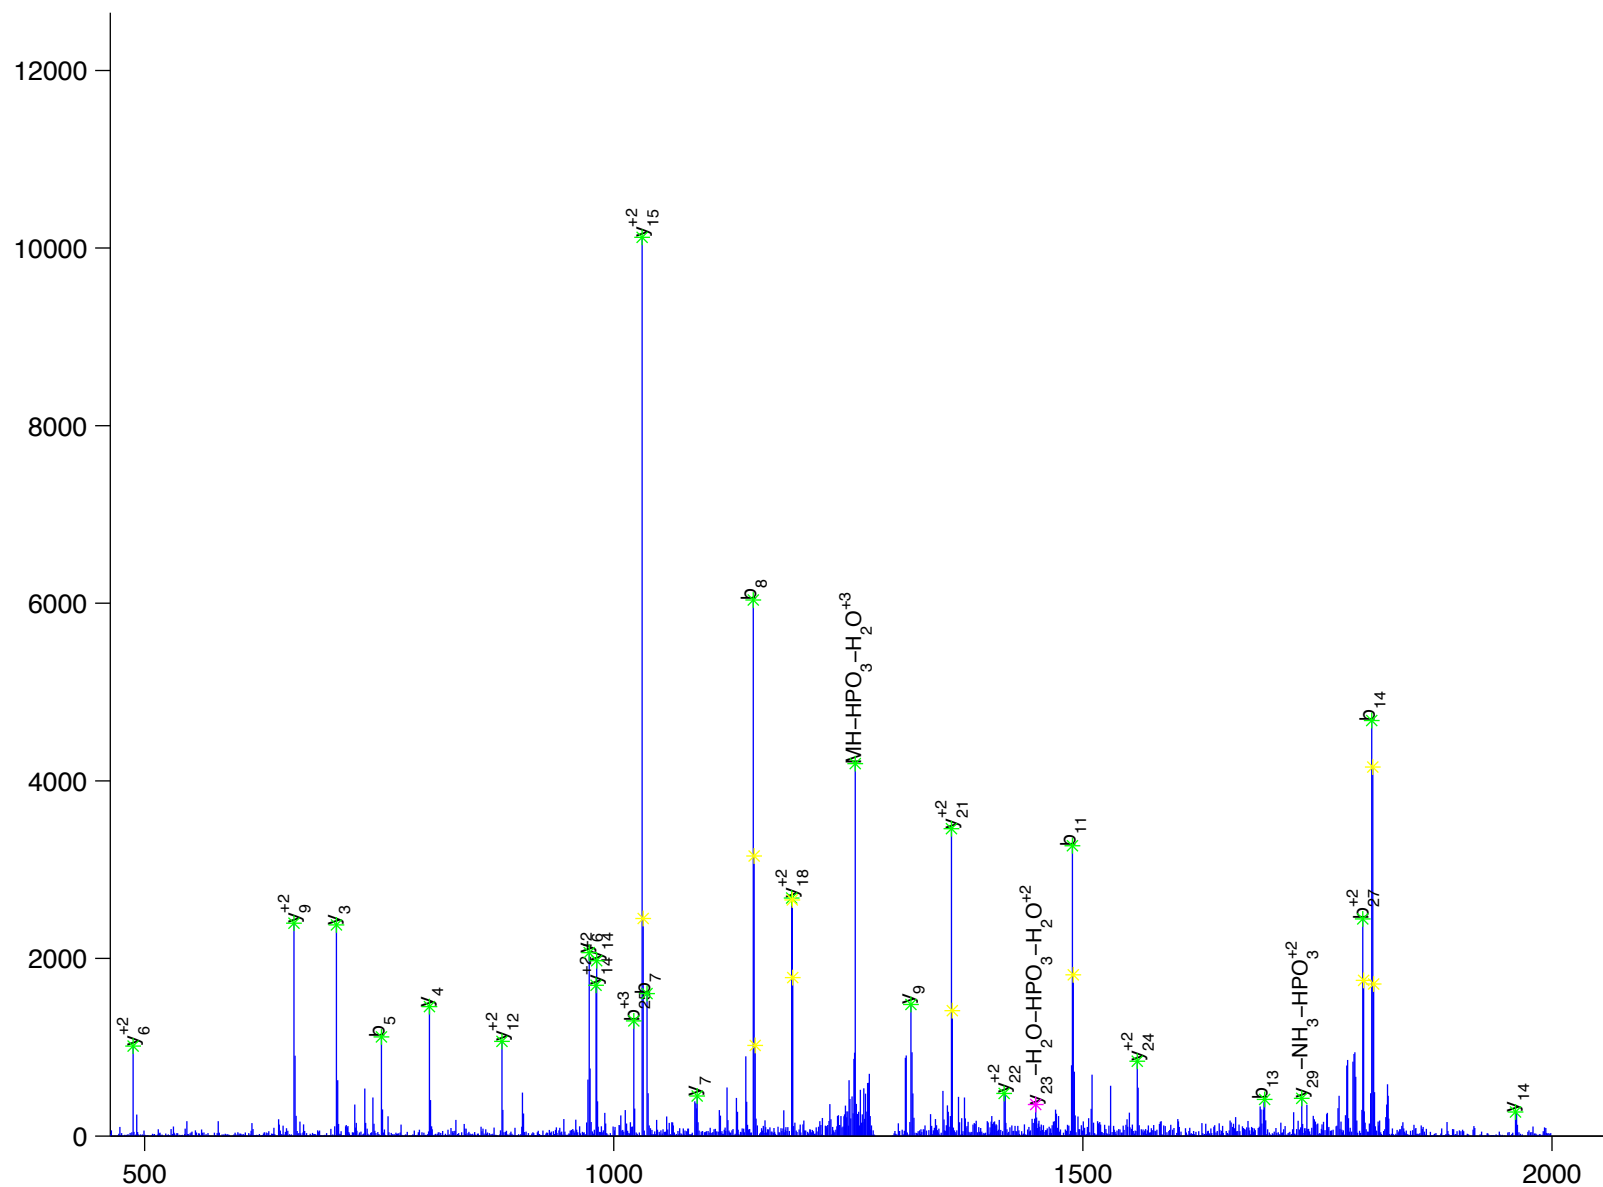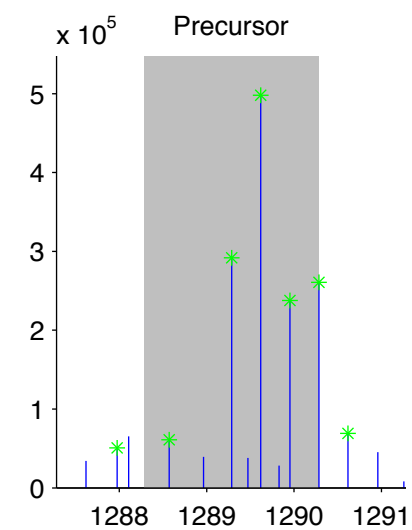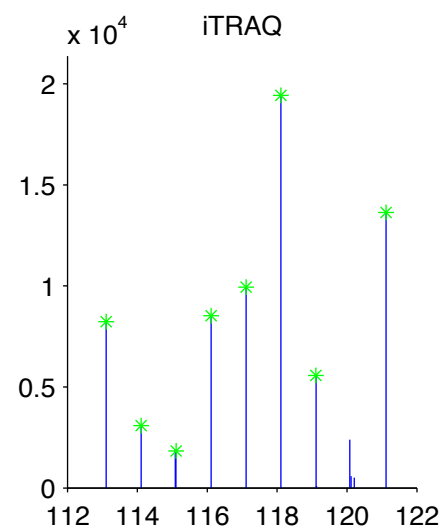

V [ Q ] P [ N ] E [ A ] V [ y ] T [ K ]

glucose-6-phosphate dehydrogenase isoform b [Homo sapiens]

Charge State: +3

Scan Number: 4522

File Name: HJ050711\_GBMxeno\_bio1\_E\_HANNAH.raw

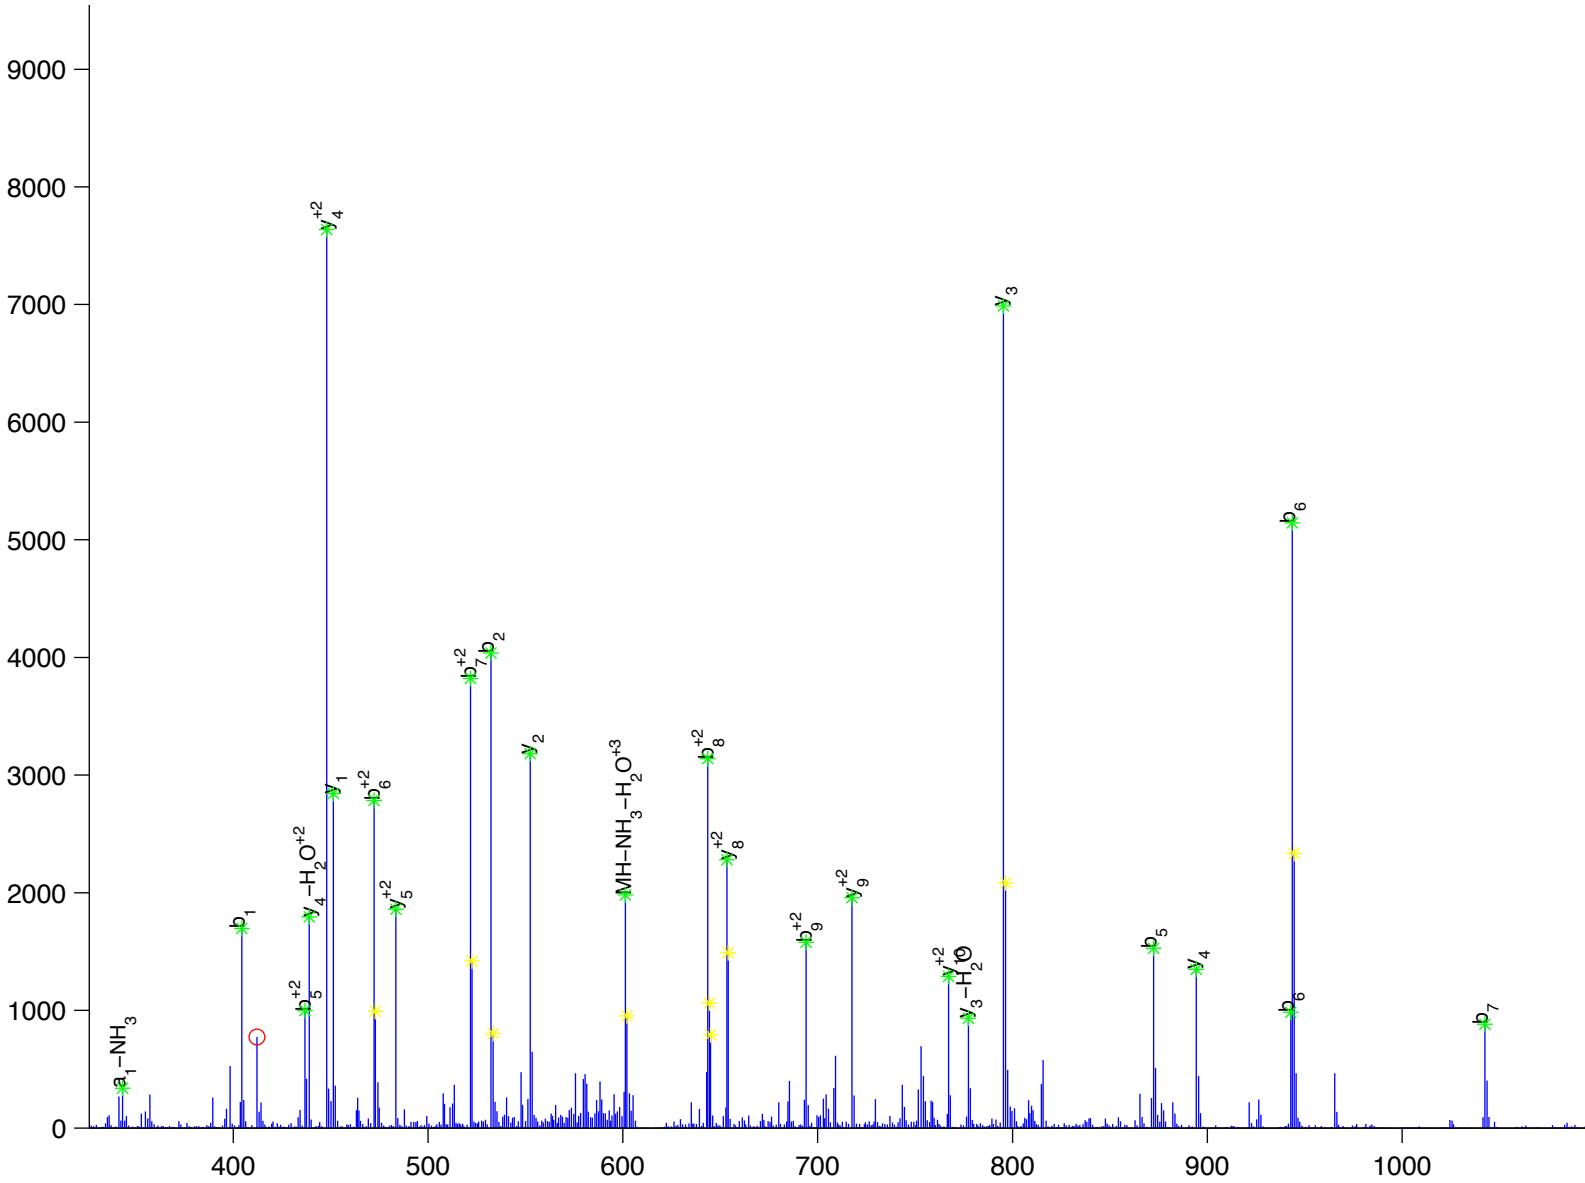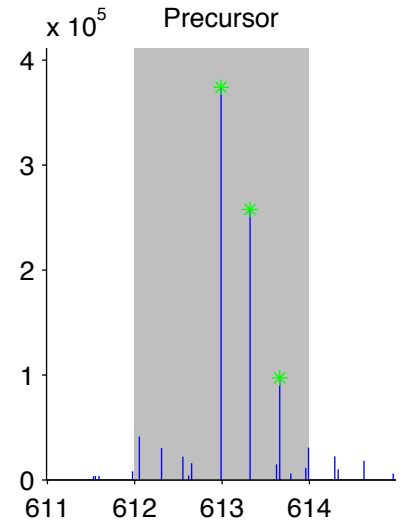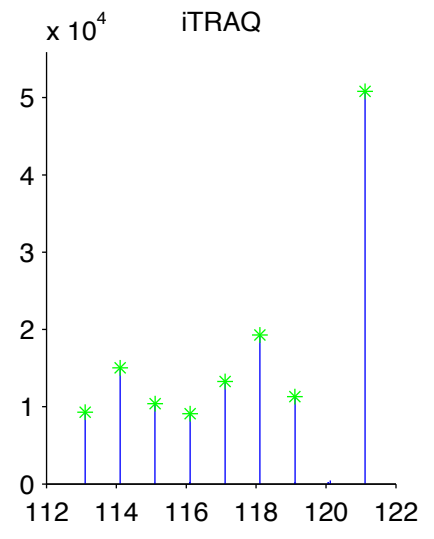

G[E]P[N]V[S]y[I]c[S]R

glycogen synthase kinase 3 alpha [Homo sapiens]

Charge State: +2

Scan Number: 4917

File Name: HJ050711\_GBMxeno\_bio1\_E\_HANNAH.raw

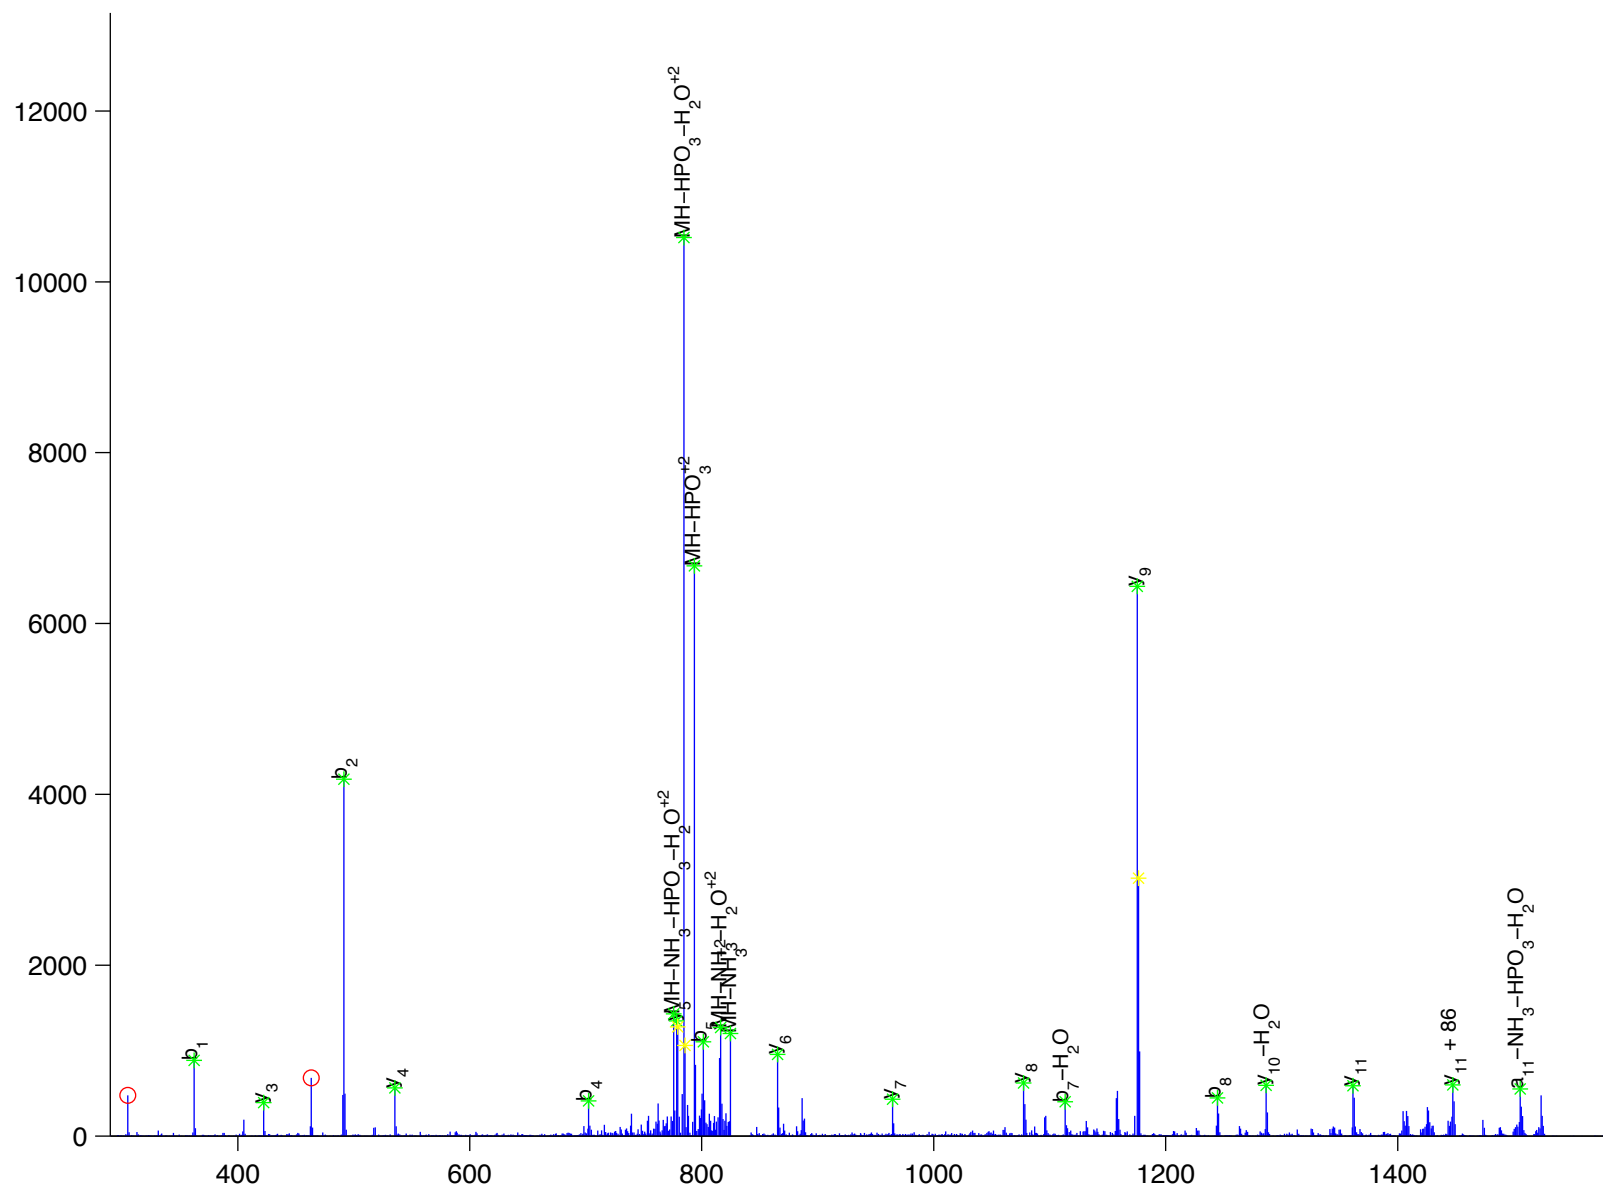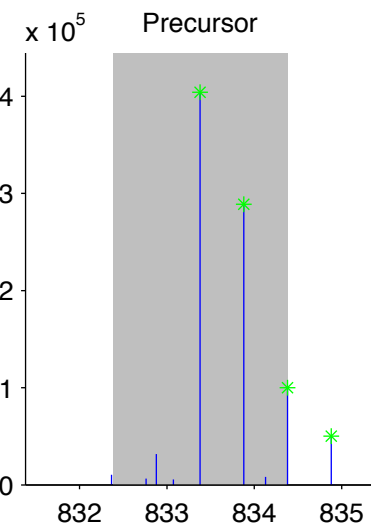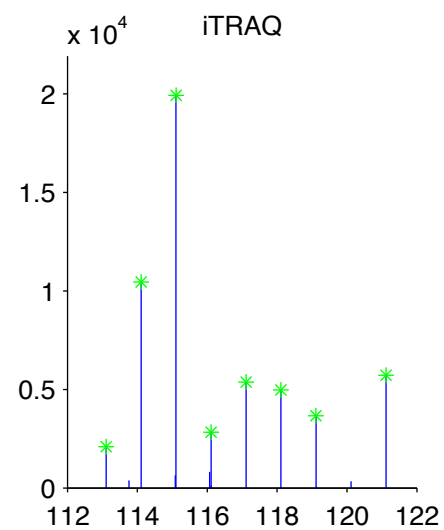

G [ E ] P [ N ] V [ S ] y [ I ] c [ S ] R

glycogen synthase kinase 3 alpha [Homo sapiens]

Charge State: +2

Scan Number: 4950

File Name: HJ050711\_GBMxeno\_bio1\_E\_HANNAH.raw

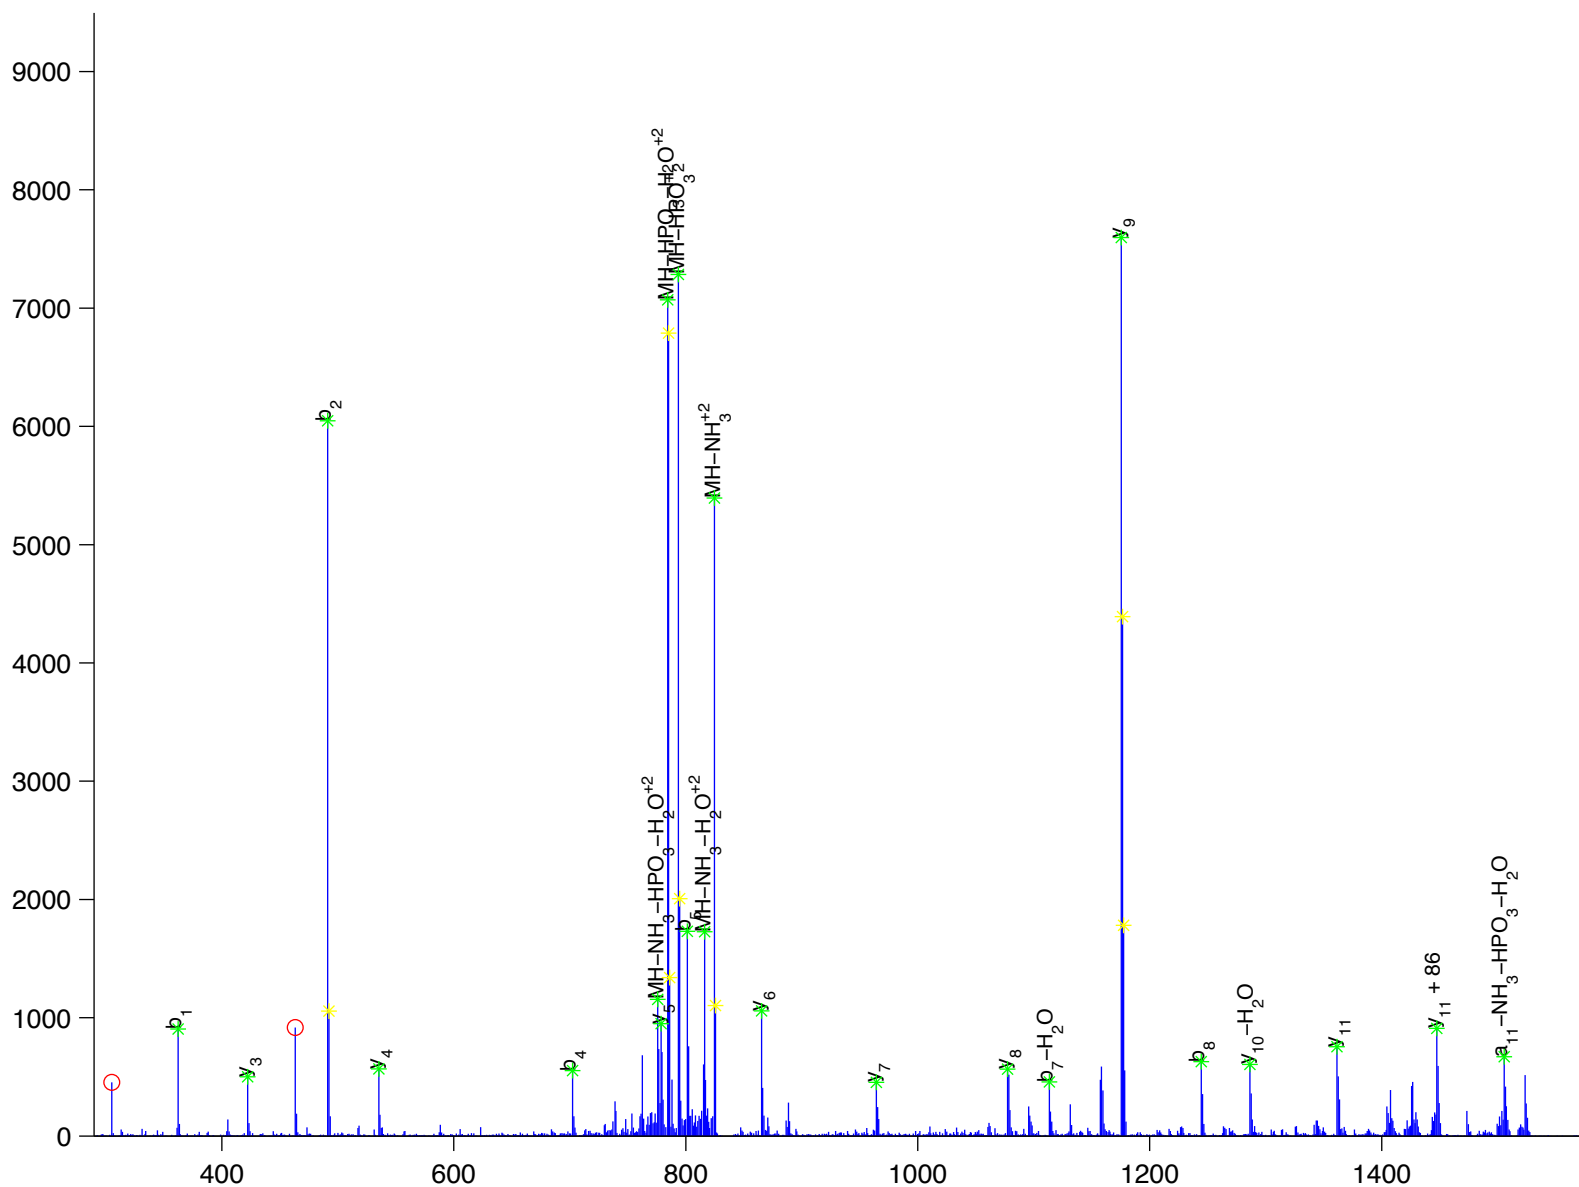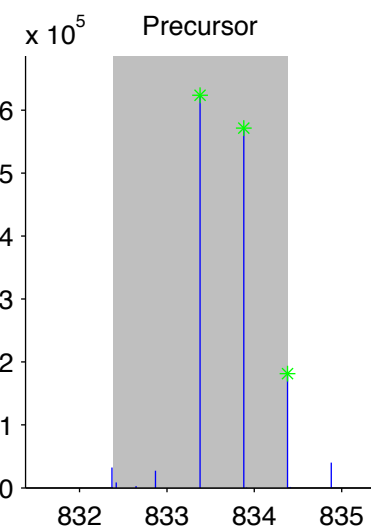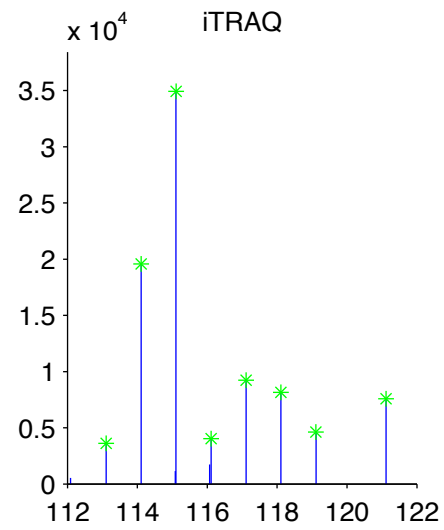

G[E]P[N]V[S]y[I]c[S]R

glycogen synthase kinase 3 alpha [Homo sapiens]

Charge State: +3

Scan Number: 5257

File Name: HJ050711\_GBMxeno\_bio1\_E\_HANNAH.raw

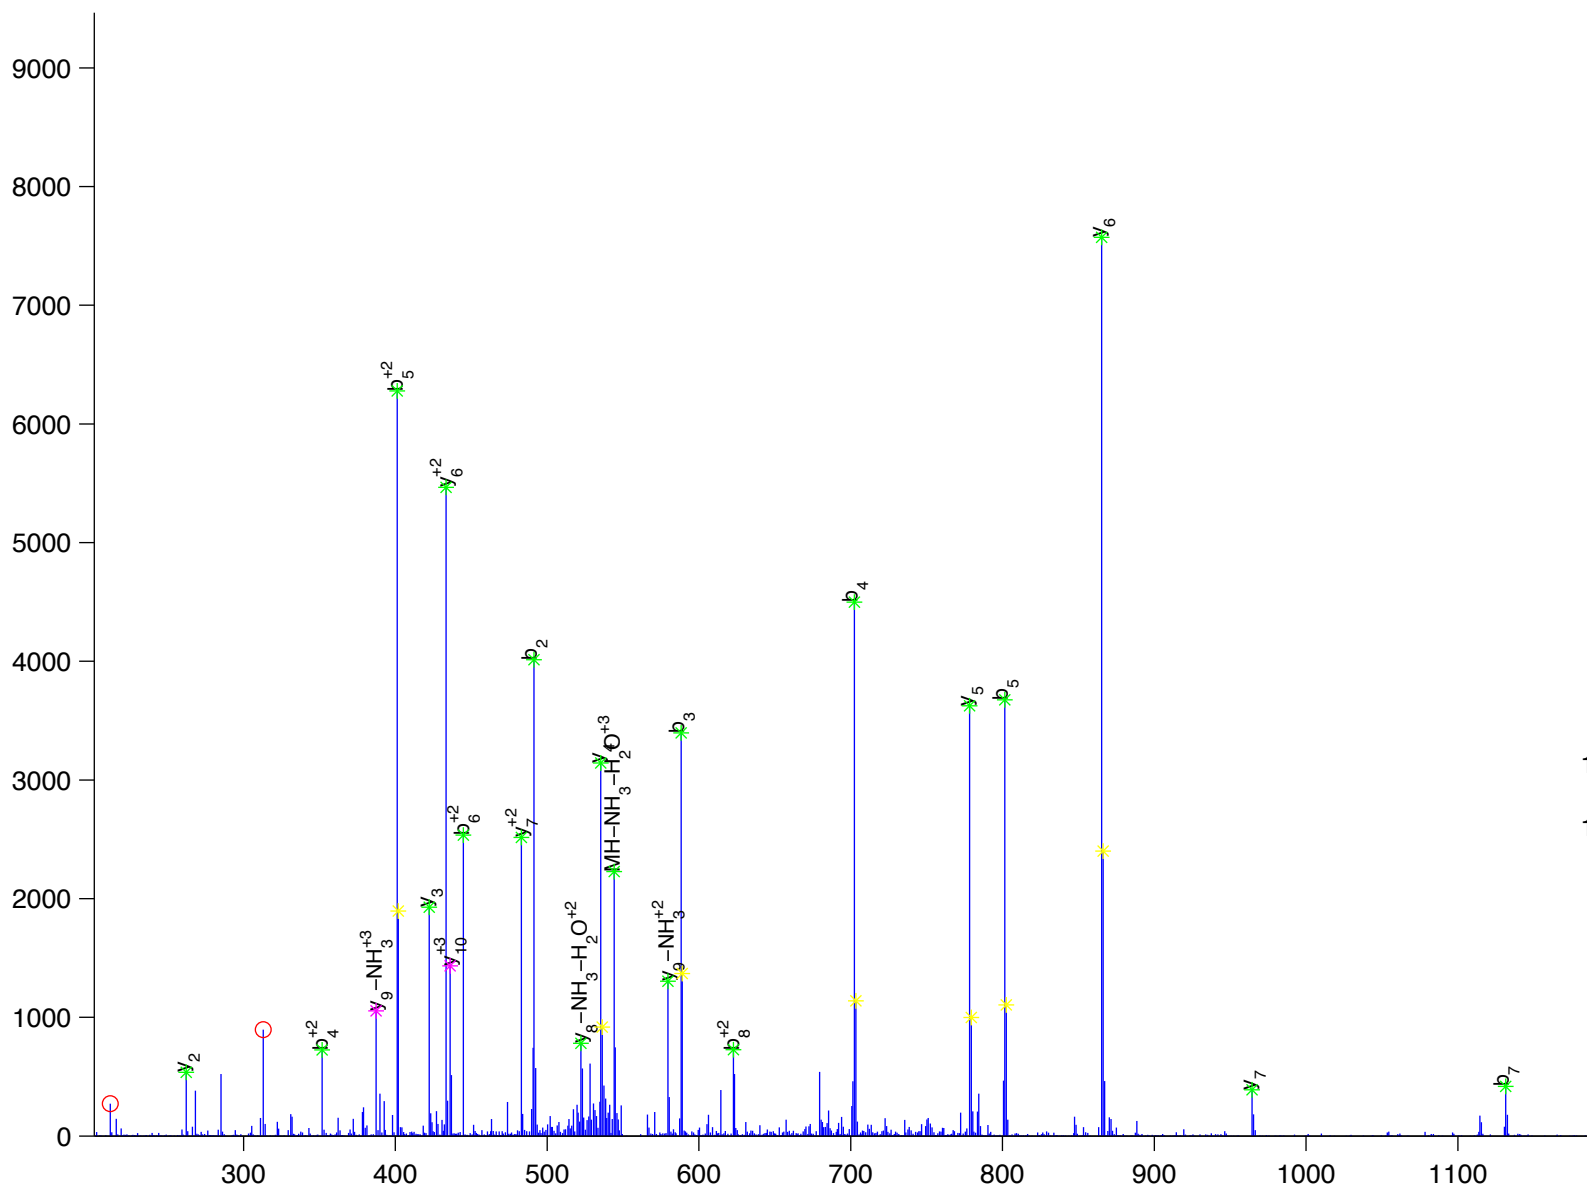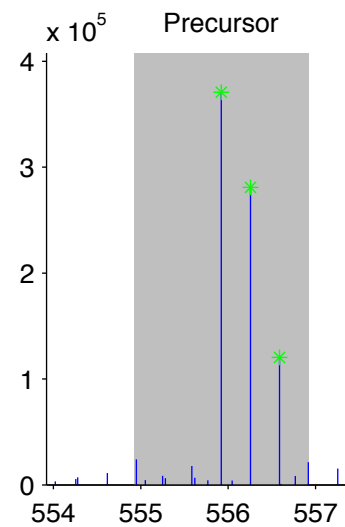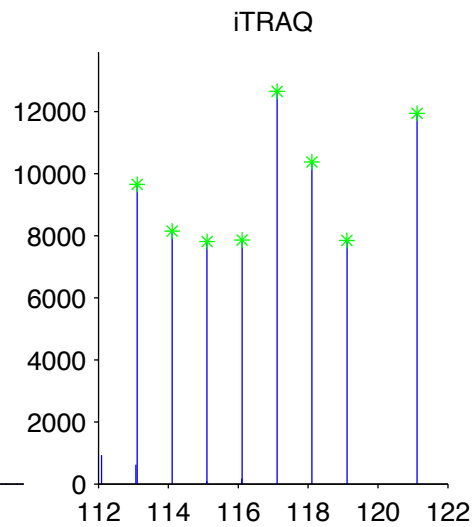

G [ E ] P [ N ] V [ S ] y [ I ] c [ S ] R

glycogen synthase kinase 3 alpha [Homo sapiens]

Charge State: +2

Scan Number: 5442

File Name: HJ050711\_GBMxeno\_bio1\_E\_HANNAH.raw

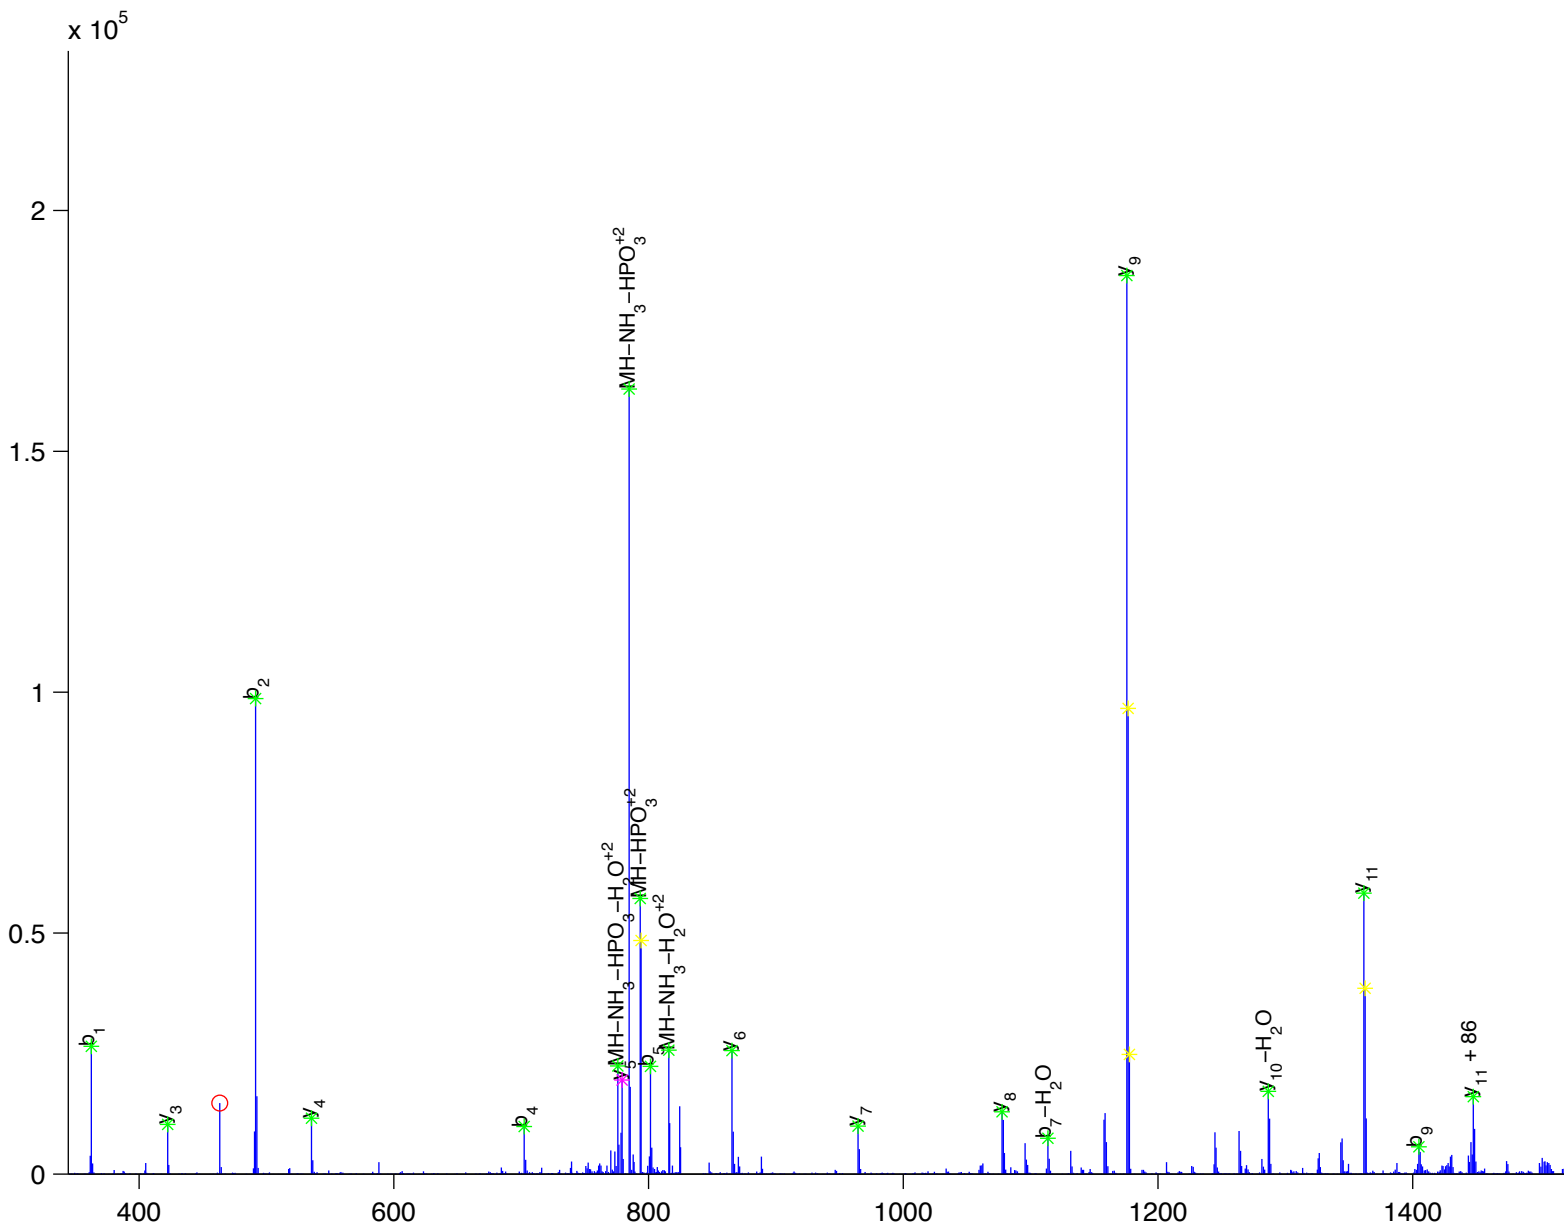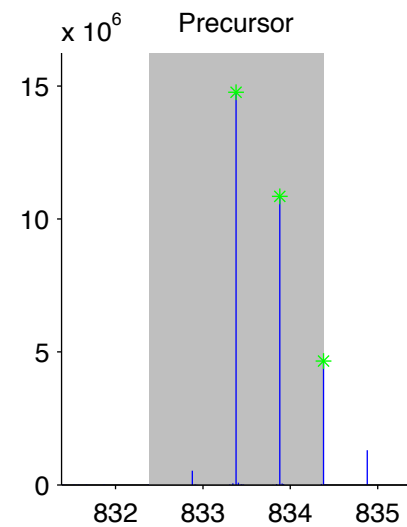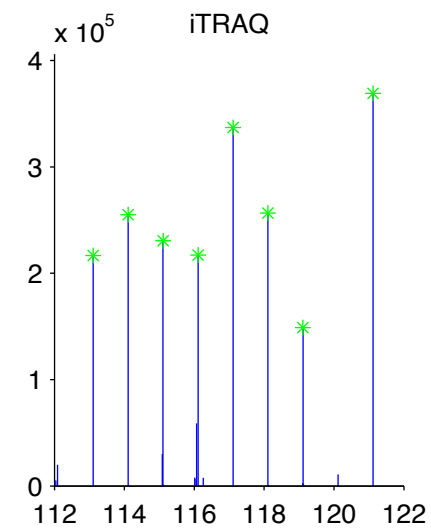

G[E]P[N]V[S]y[I]c[S]R

glycogen synthase kinase 3 alpha [Homo sapiens]

Charge State: +2

Scan Number: 5446

File Name: HJ050711\_GBMxeno\_bio1\_E\_HANNAH.raw

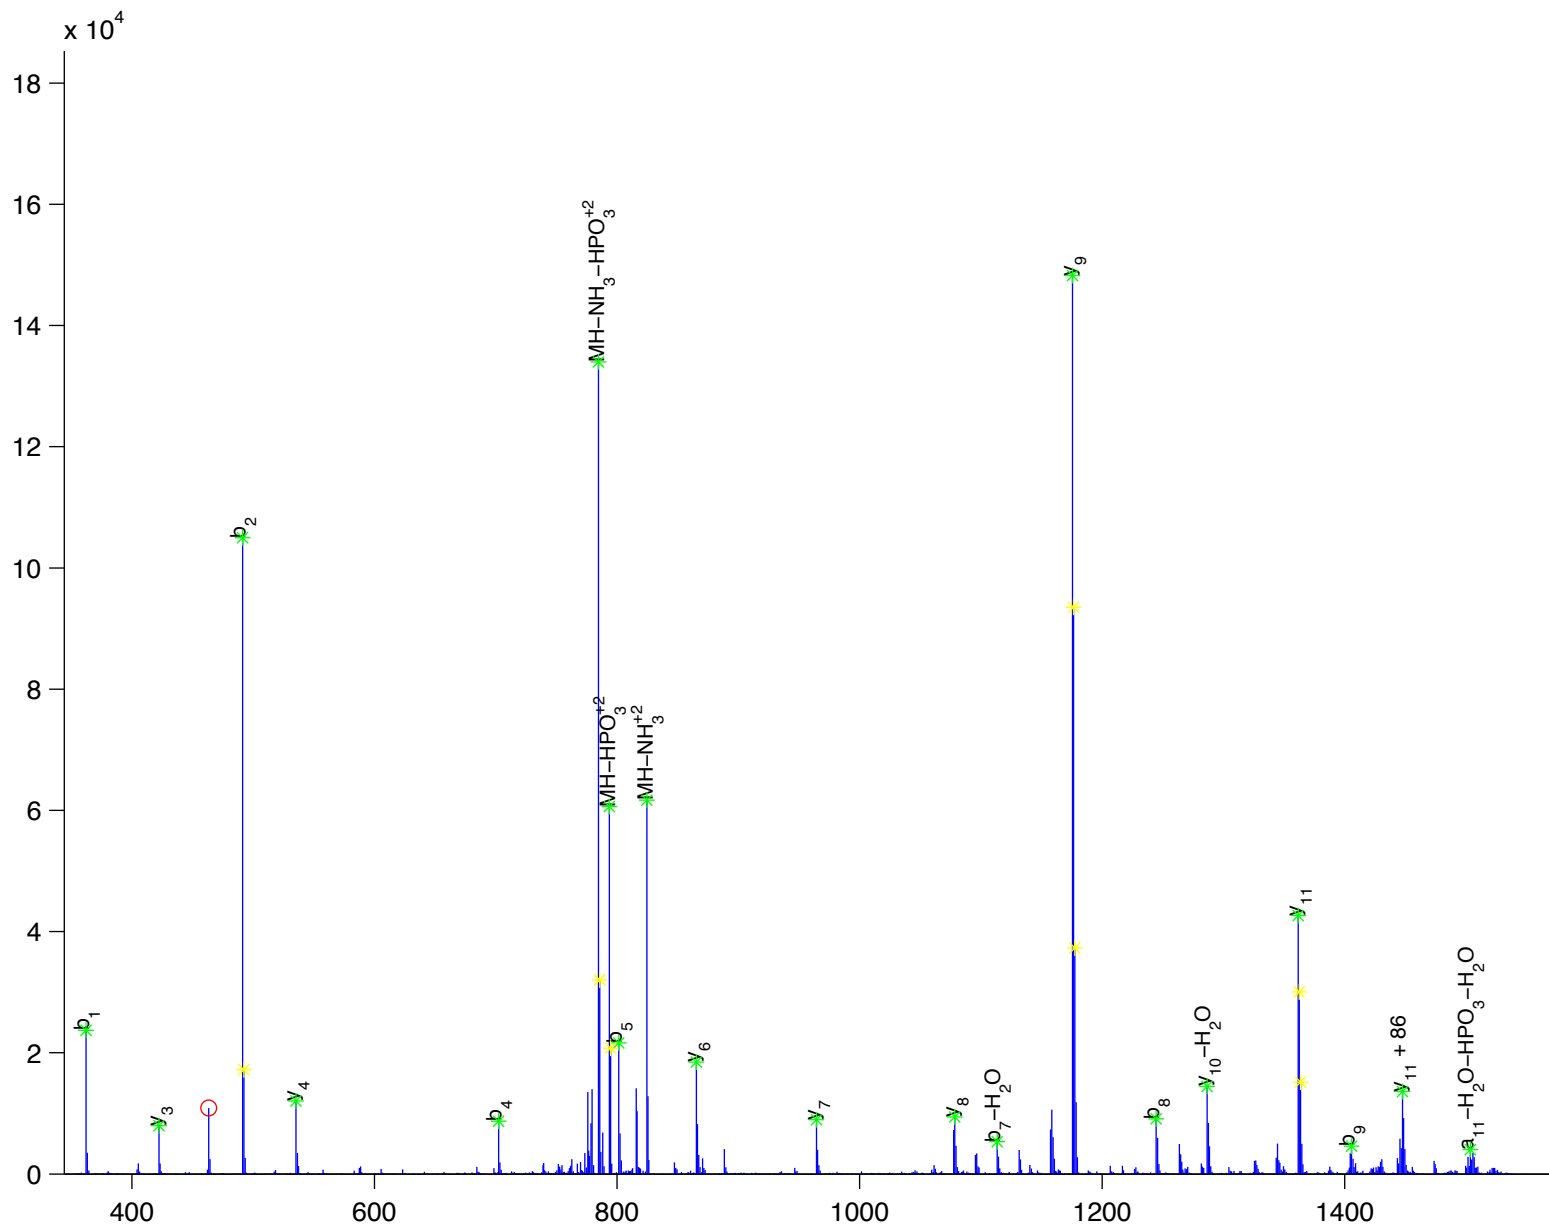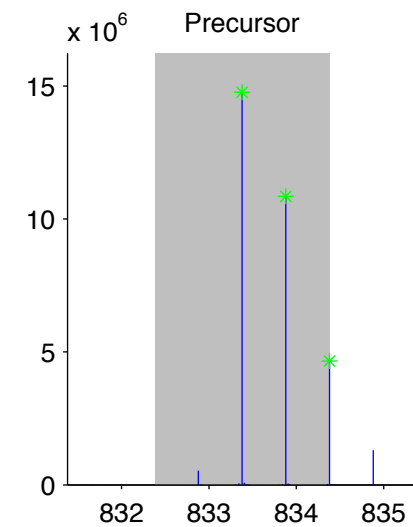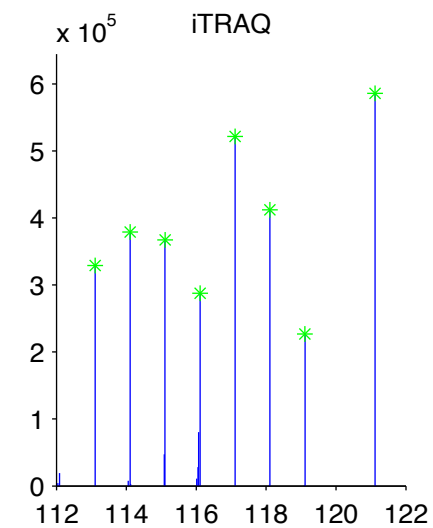



G[E]P[N]V[S]y[I]c[S]R

glycogen synthase kinase 3 alpha [Homo sapiens]

Charge State: +2

Scan Number: 5641

File Name: HJ050711\_GBMxeno\_bio1\_E\_HANNAH.raw

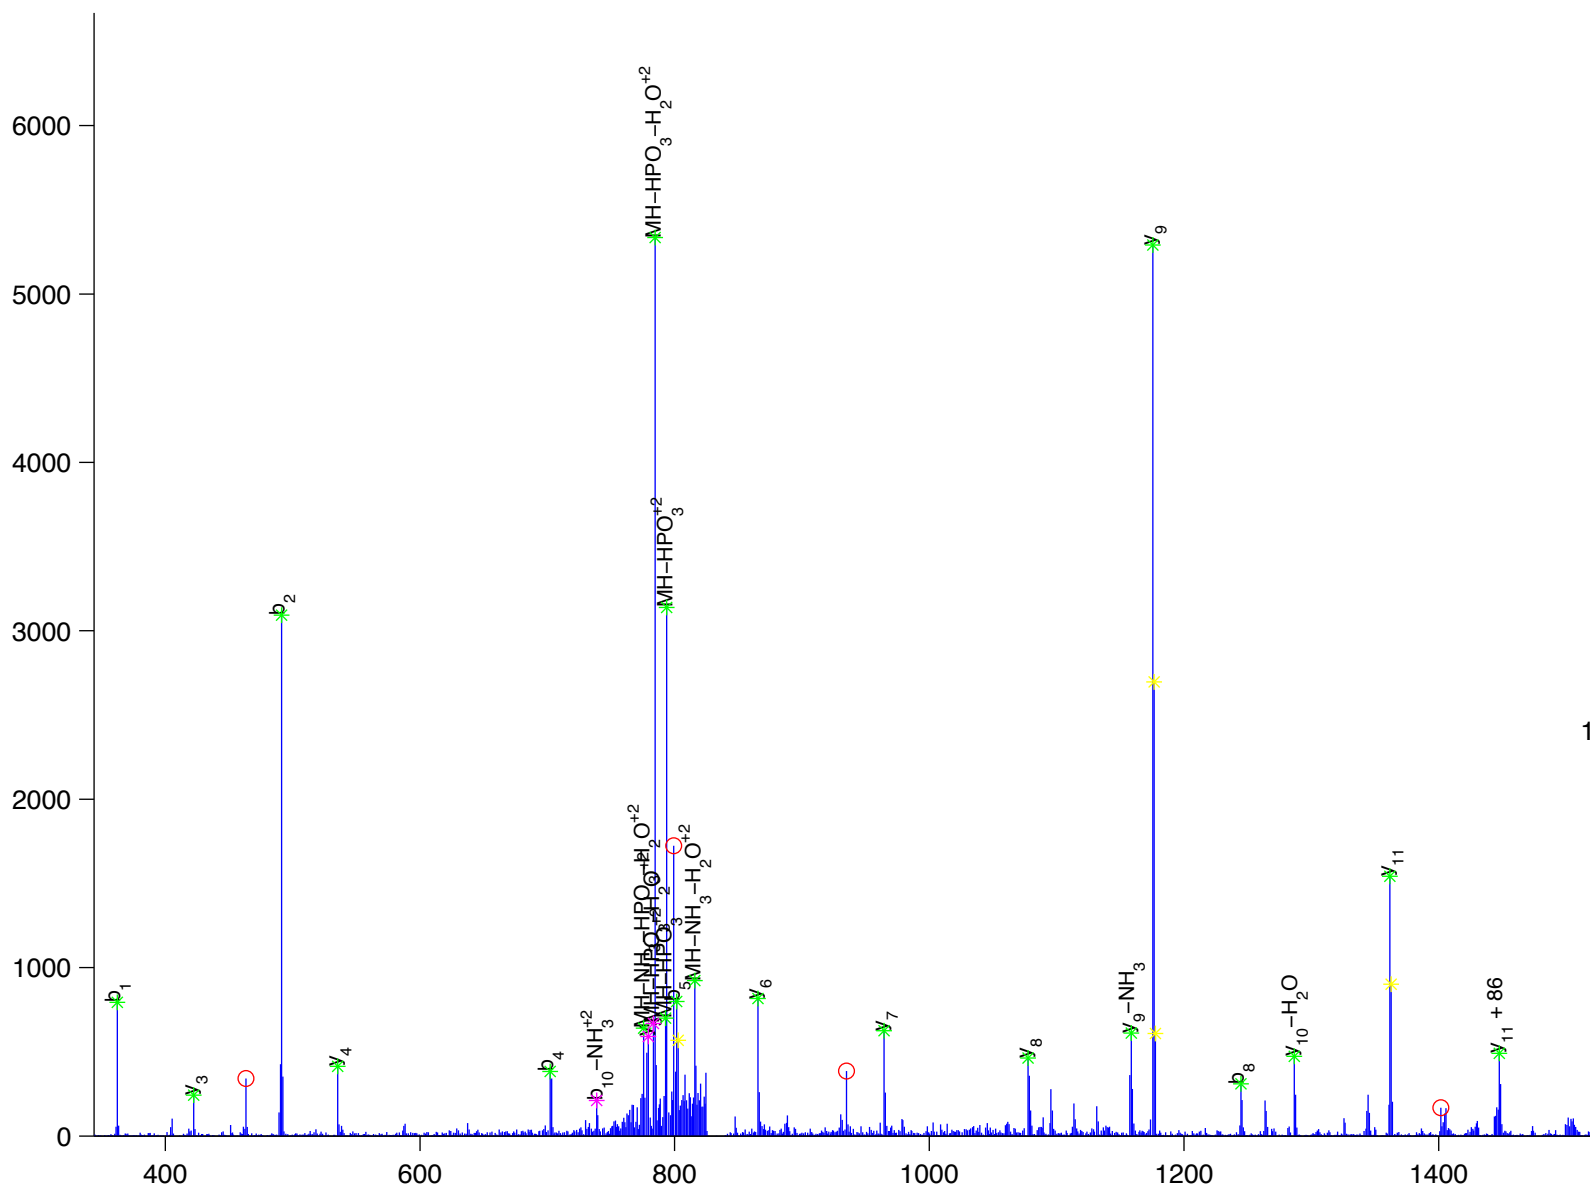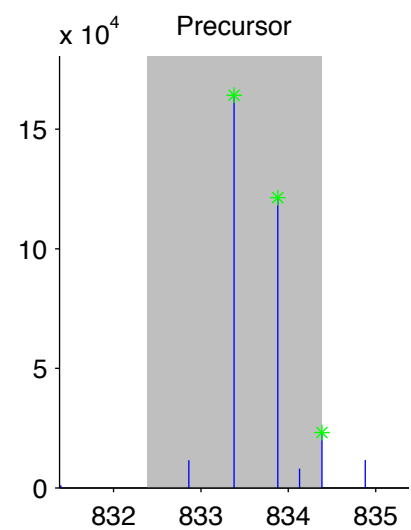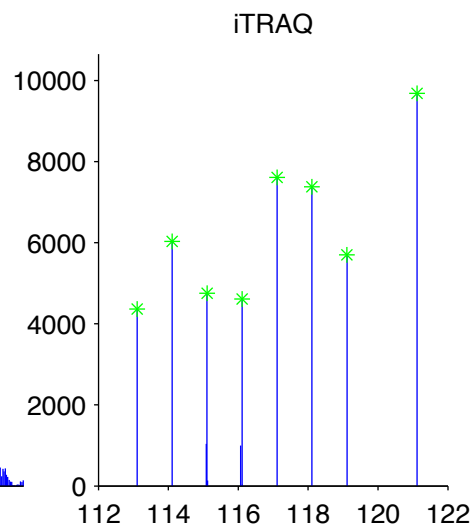

G[E]P[N]V[S]y[I]c[S]R

glycogen synthase kinase 3 alpha [Homo sapiens]

Charge State: +2

Scan Number: 5666

File Name: HJ050711\_GBMxeno\_bio1\_E\_HANNAH.raw

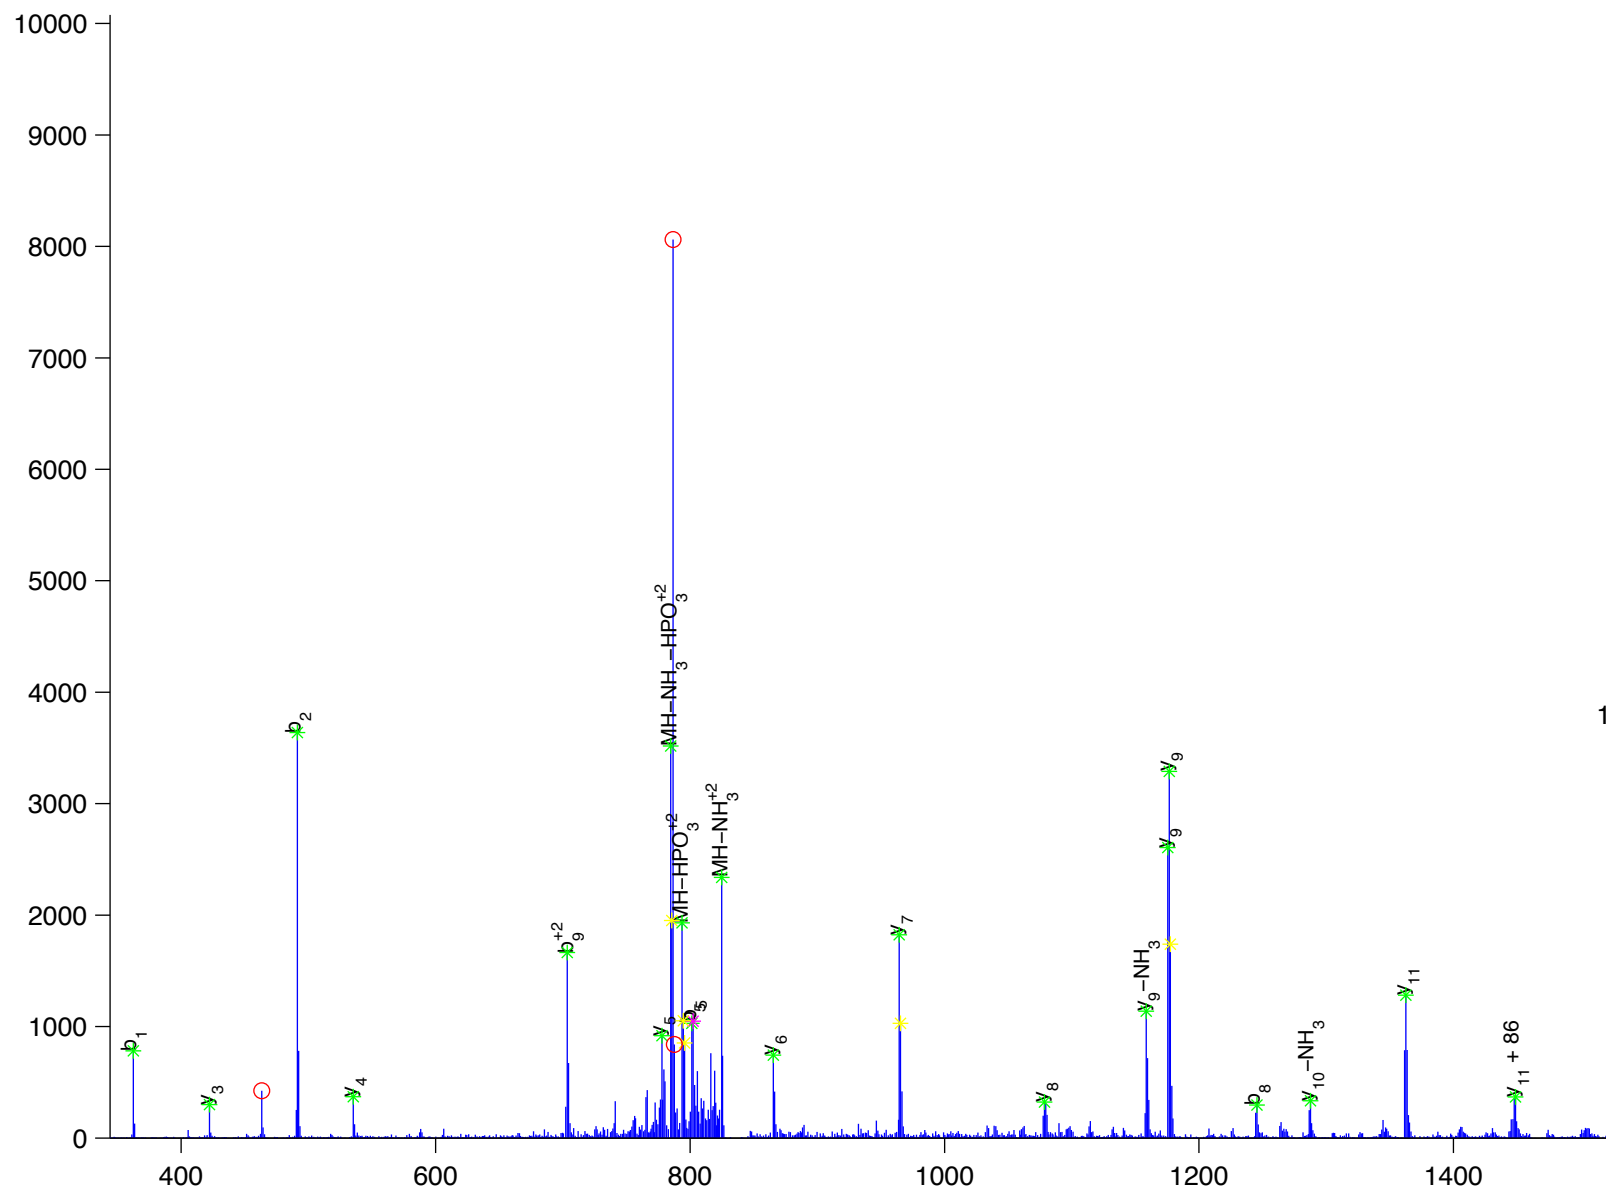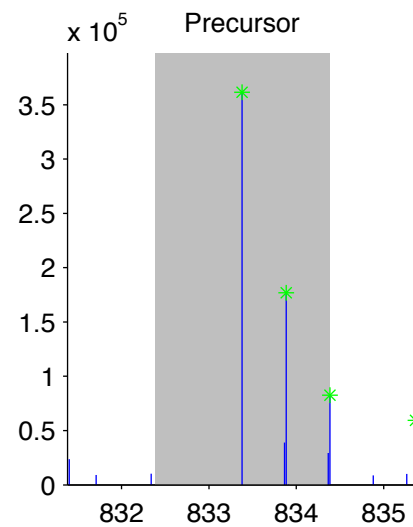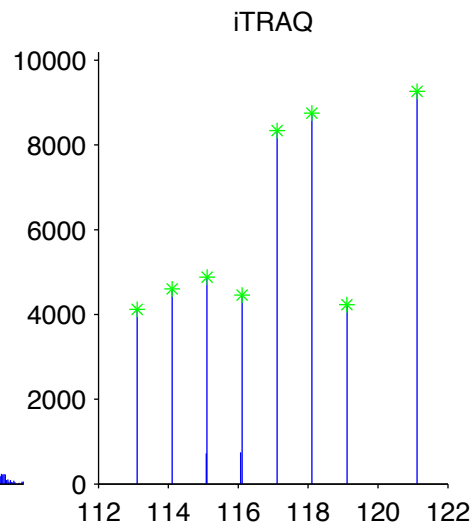

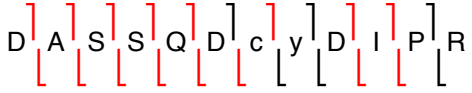

GRB2-associated binding protein 1 isoform a [Homo sapiens]

Charge State: +2

Scan Number: 4312

File Name: HJ050711\_GBMxeno\_bio1\_E\_HANNAH.raw

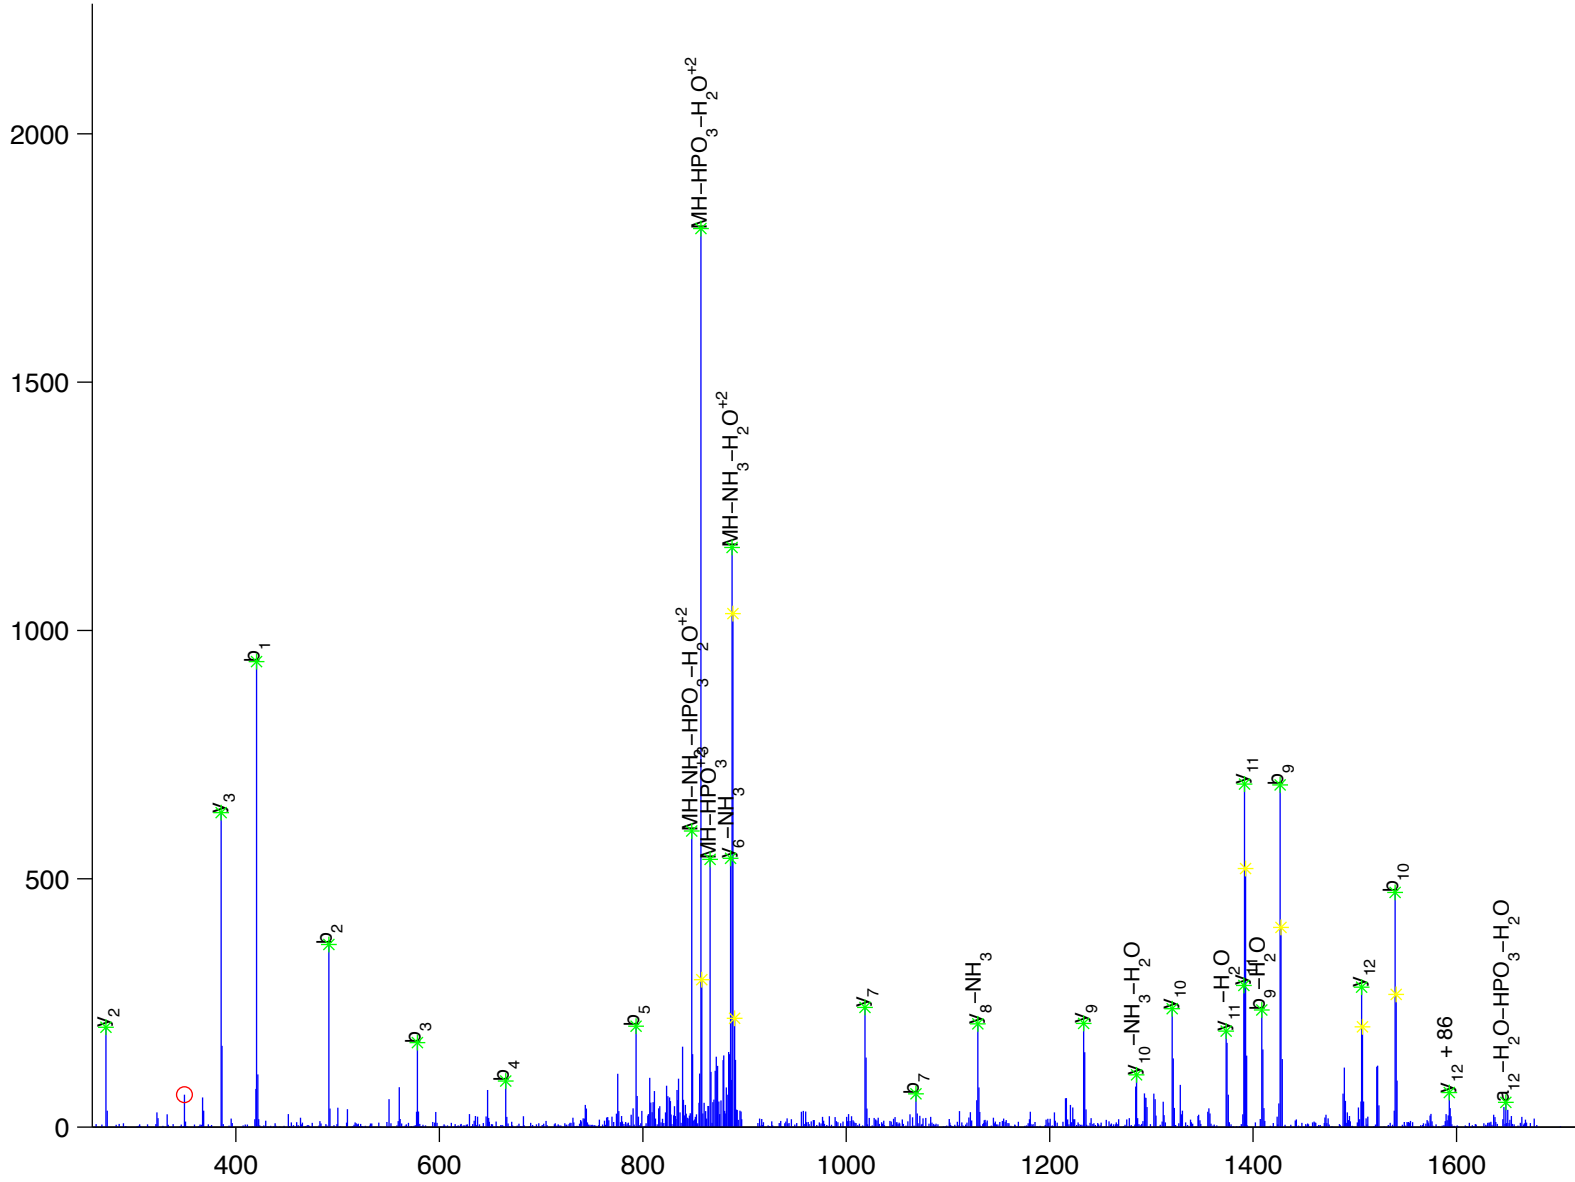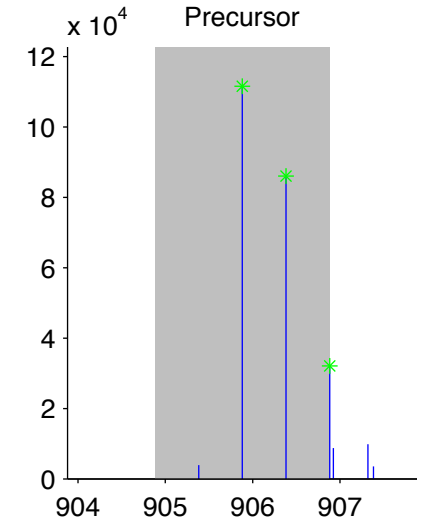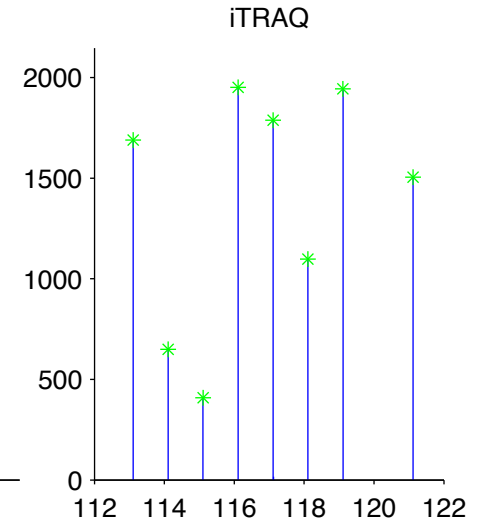

G [D] [K] [Q] [V] [E] [y] [L] [D] [L] [D] [L] [D] [S] [G] [K]

GRB2-associated binding protein 1 isoform a [Homo sapiens]

Charge State: +3

Scan Number: 7027

File Name: HJ050711\_GBMxeno\_bio1\_E\_HANNAH.raw

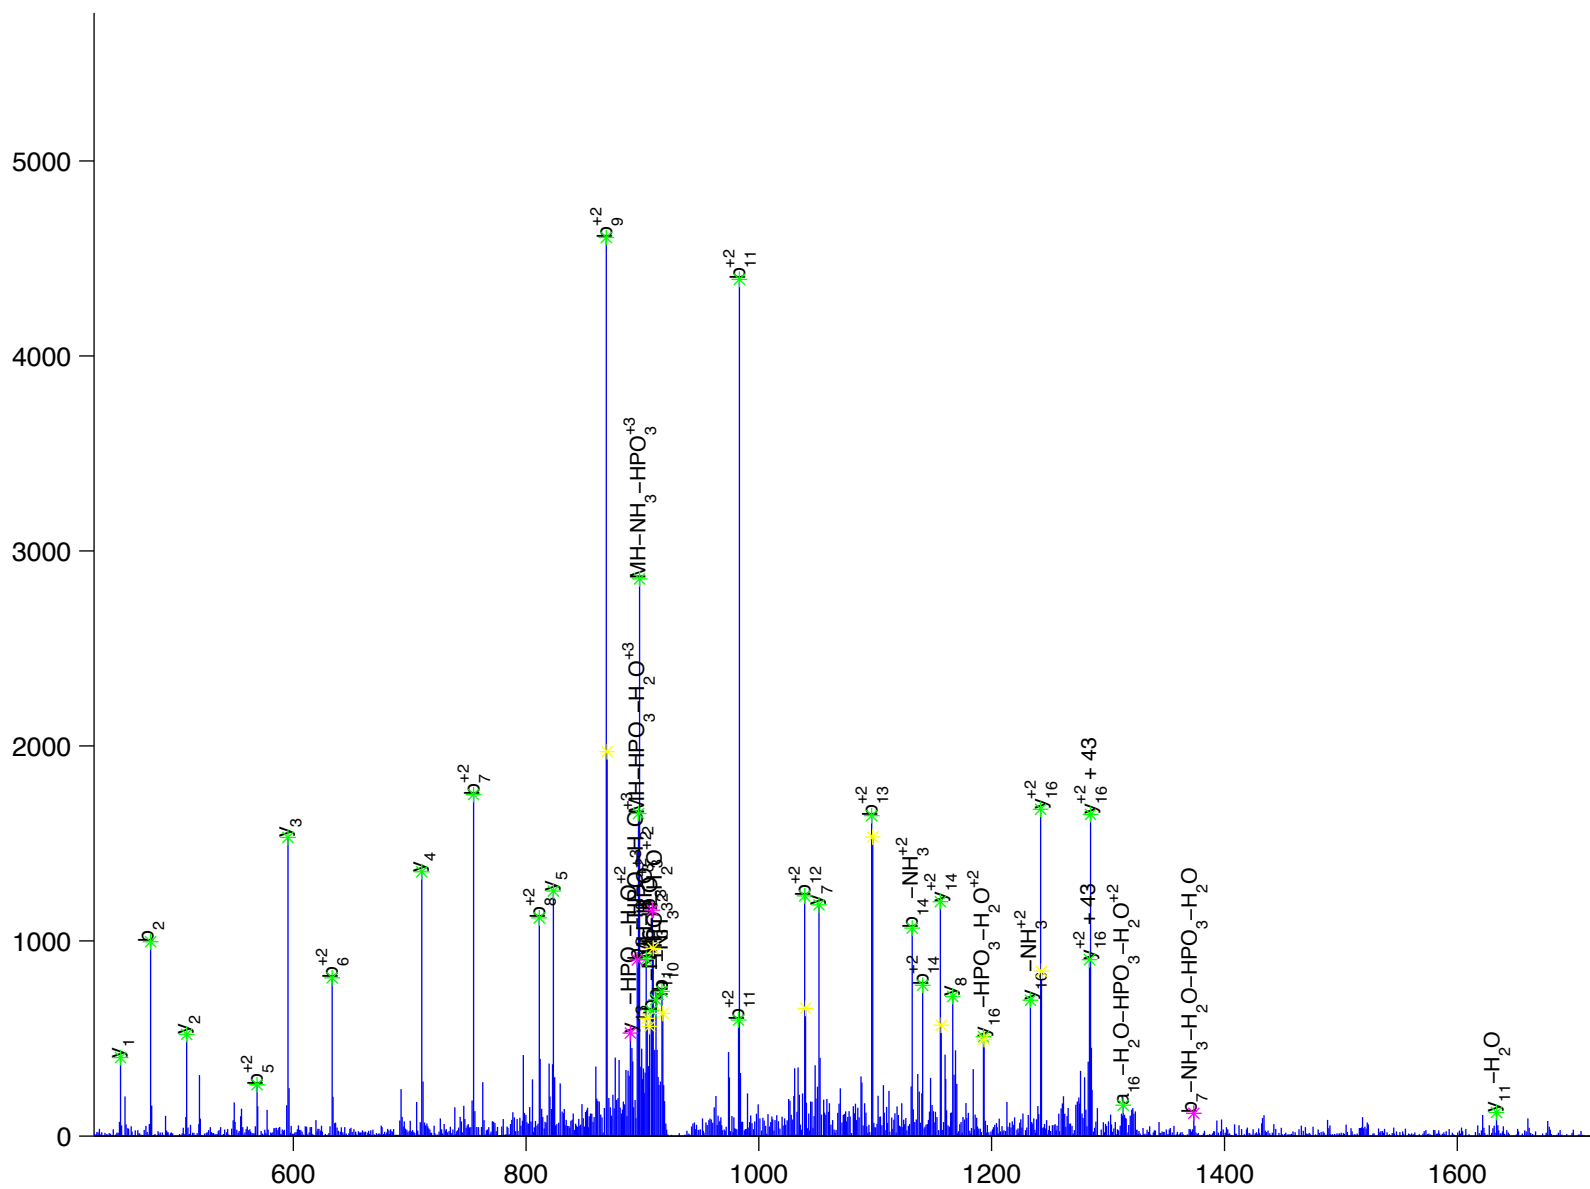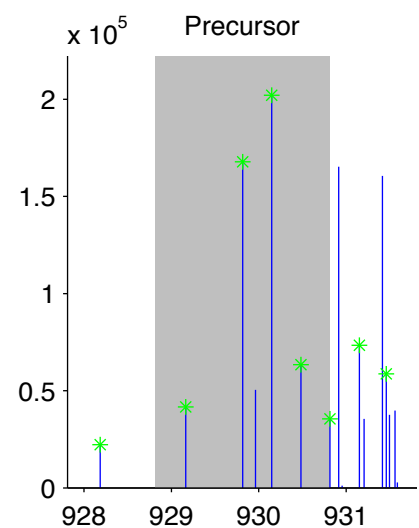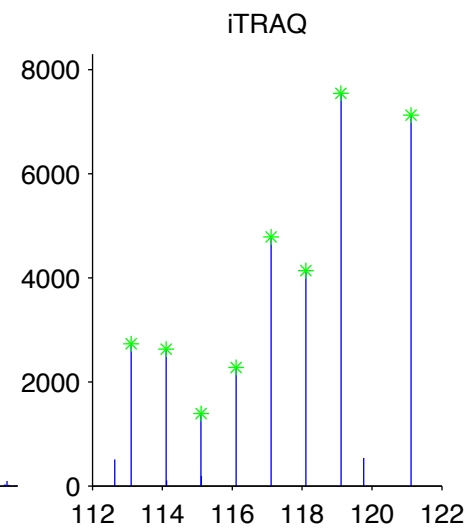

G [D] [K] [Q] [V] [E] [y] [L] [D] [L] [D] [L] [D] [S] [G] [K]

GRB2-associated binding protein 1 isoform a [Homo sapiens]

Charge State: +3

Scan Number: 7046

File Name: HJ050711\_GBMxeno\_bio1\_E\_HANNAH.raw

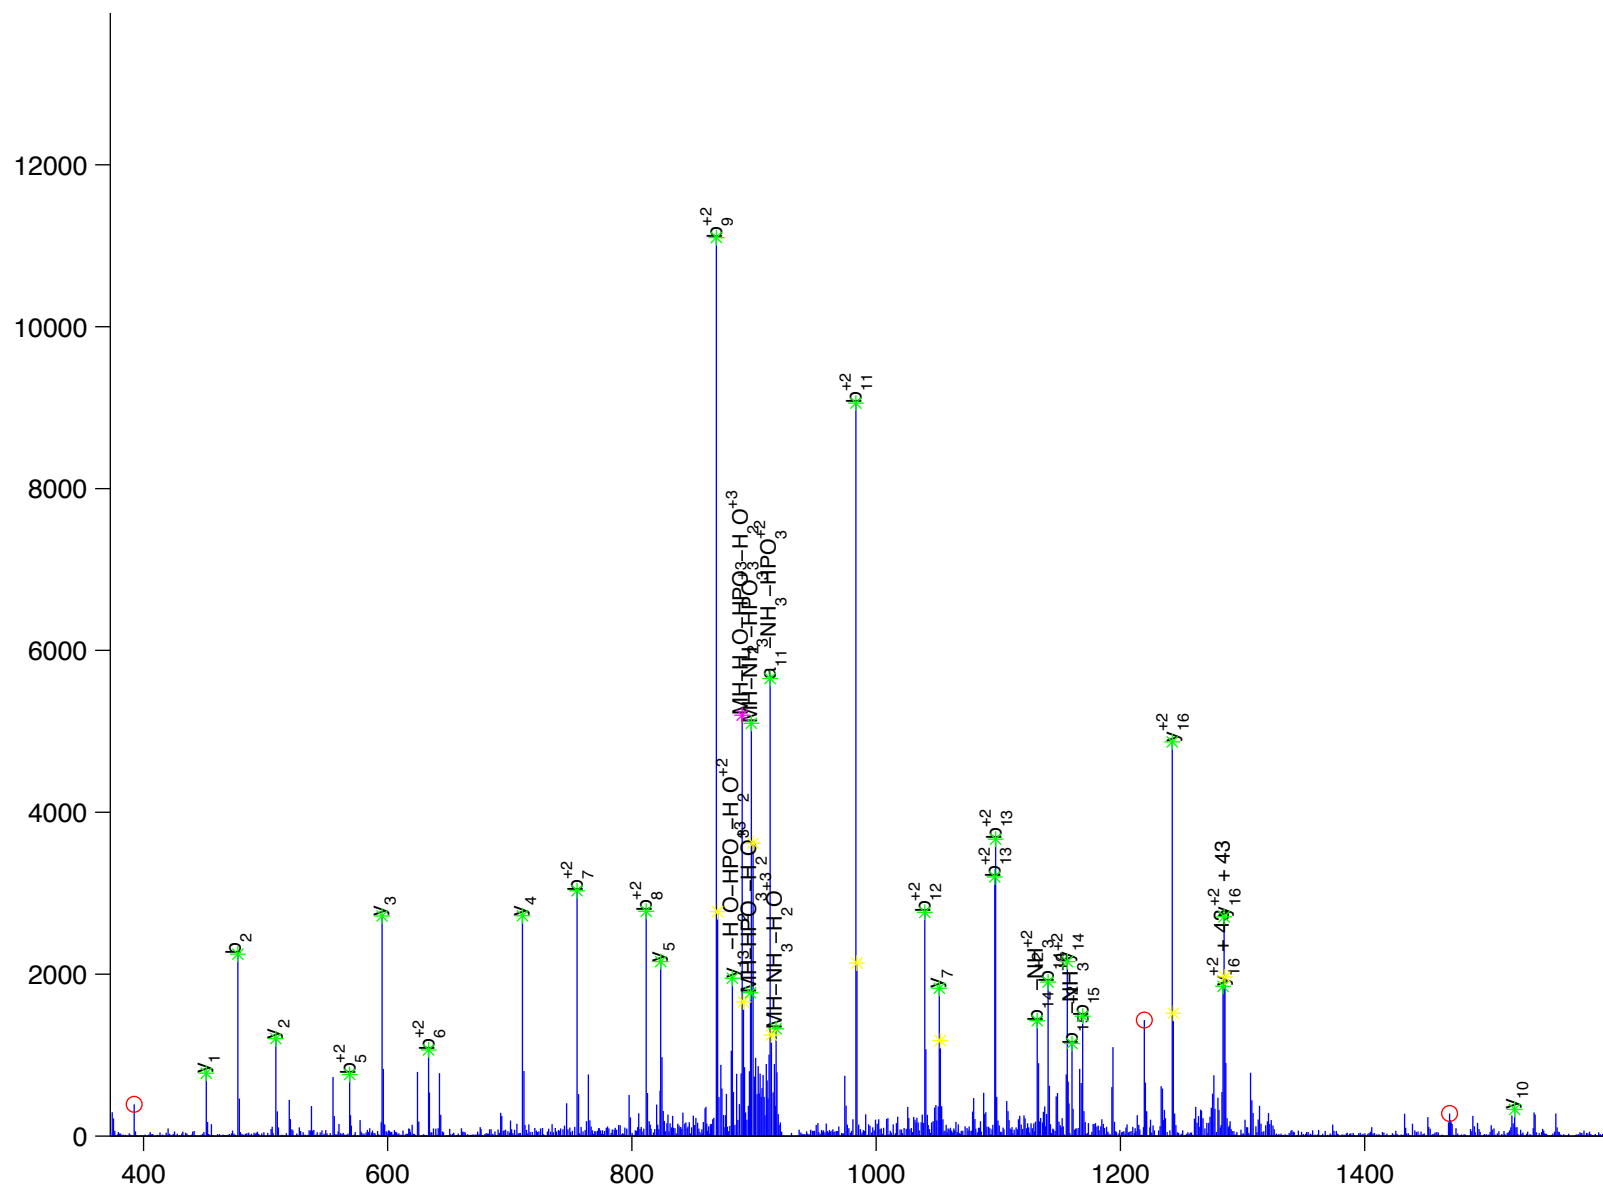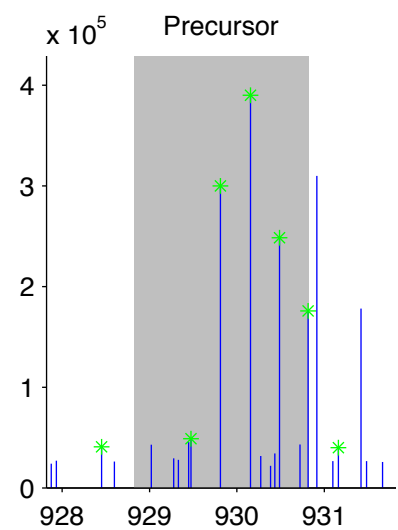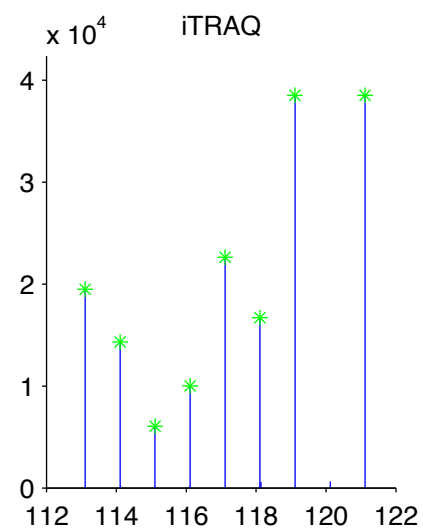

Q[V]E[y]L[D]L[D]L[D]S[G]K

GRB2-associated binding protein 1 isoform a [Homo sapiens]

Charge State: +3

Scan Number: 8130

File Name: HJ050711\_GBMxeno\_bio1\_E\_HANNAH.raw

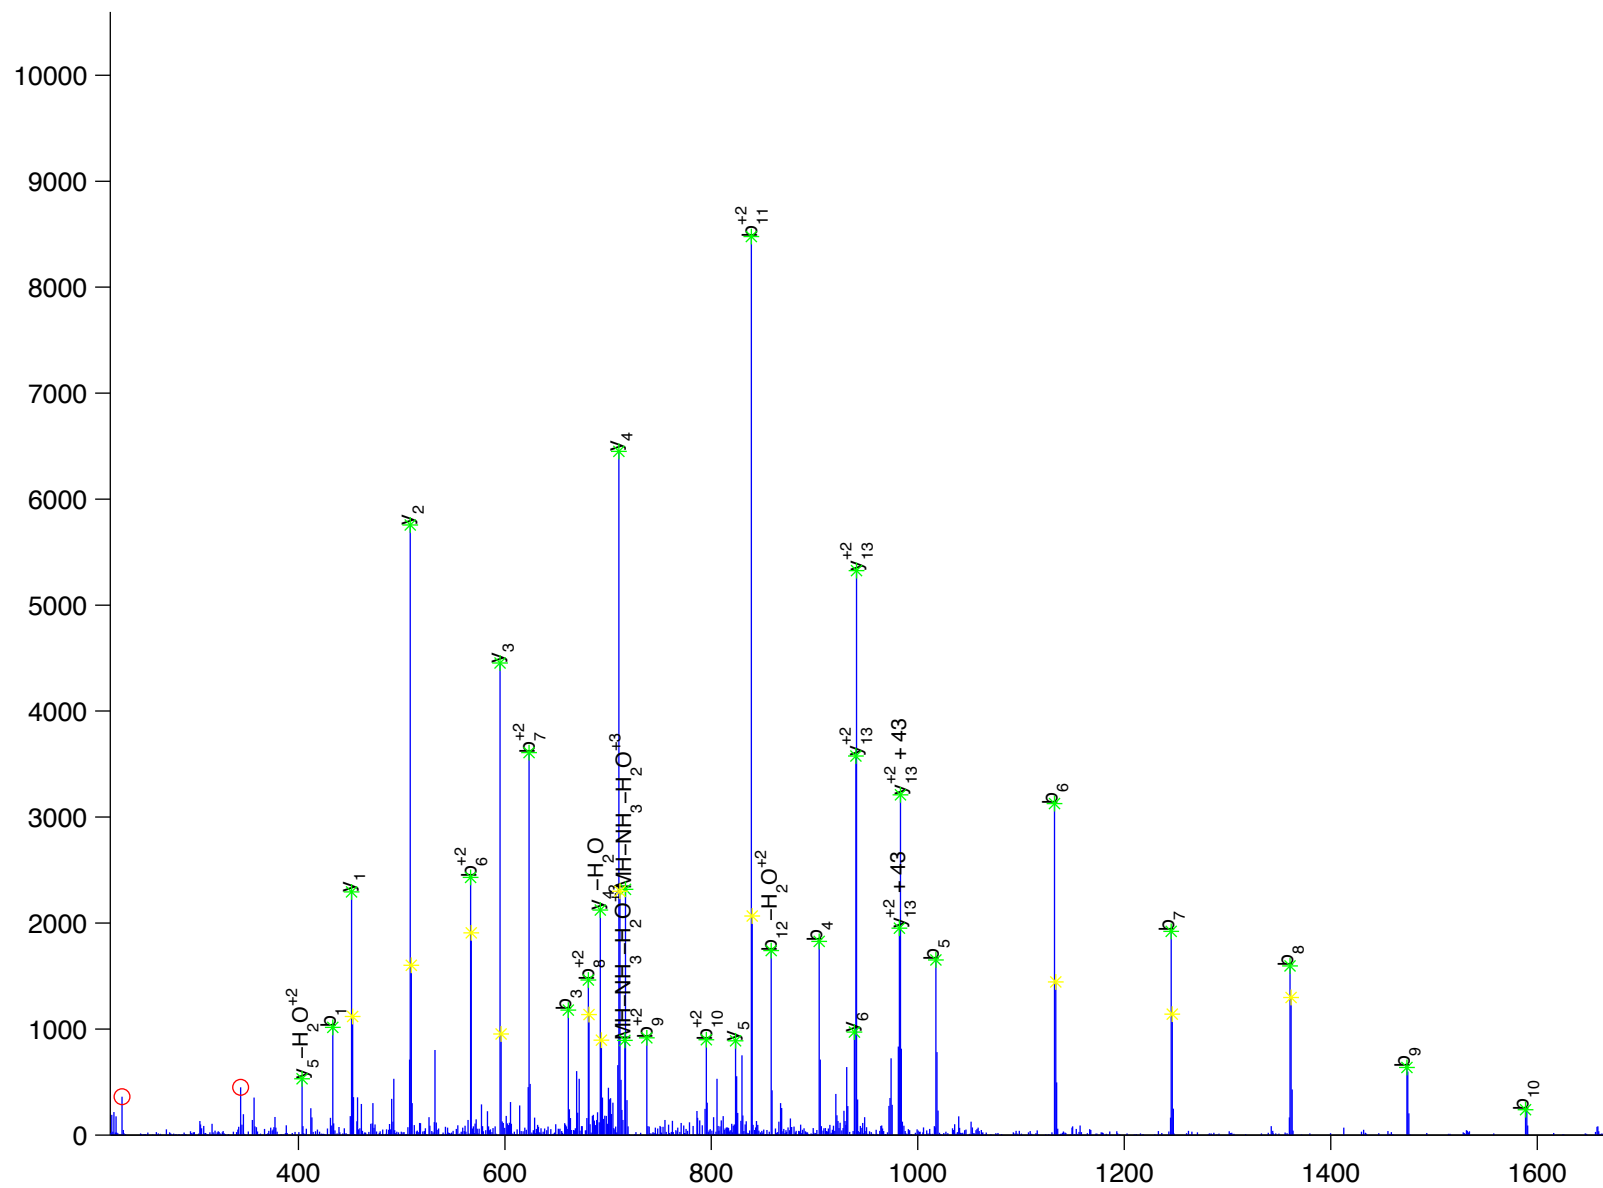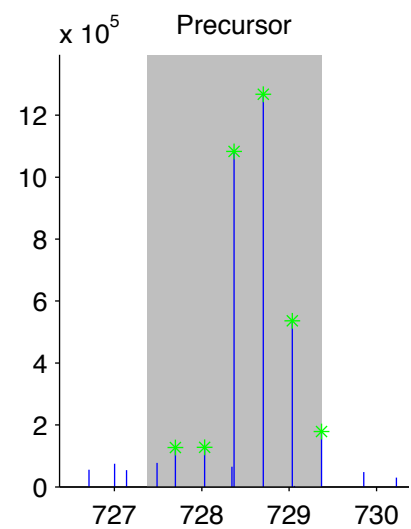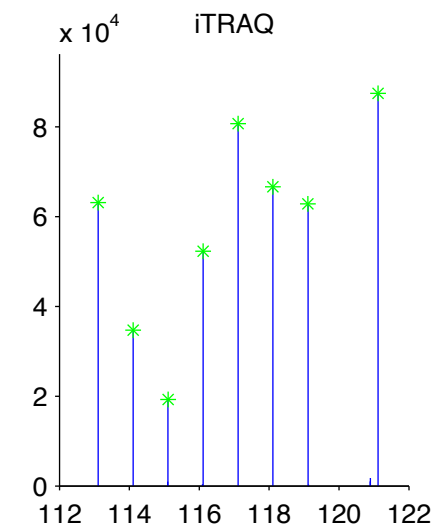

Q [ D ] E [ H ] G [ y ] I [ S ] R

heat shock 27kDa protein 1 [Homo sapiens]

Charge State: +3

Scan Number: 2321

File Name: HJ050711\_GBMxeno\_bio1\_E\_HANNAH.raw

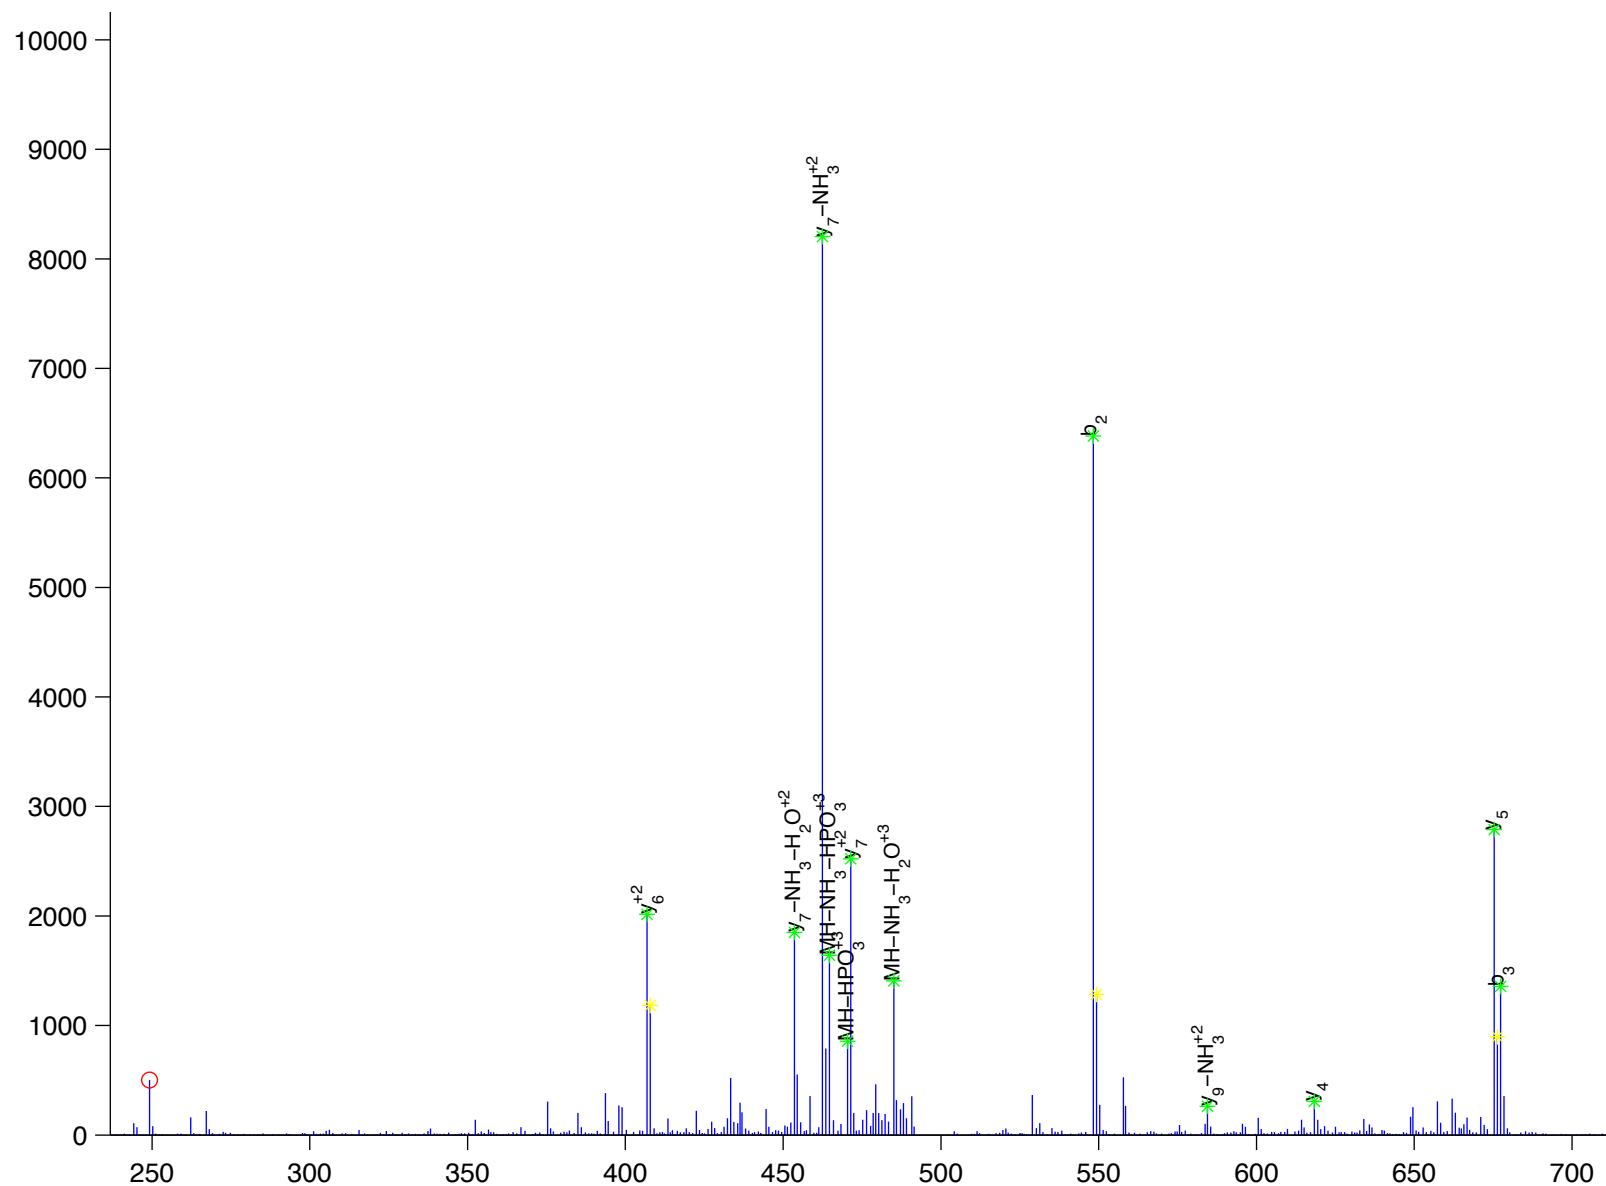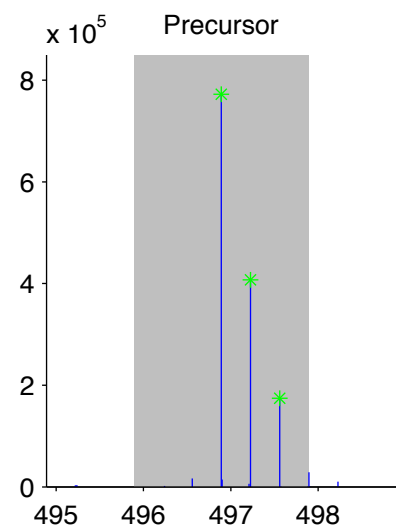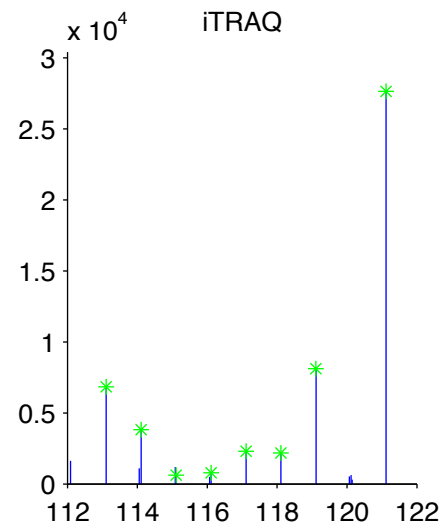

Y I D Q E E L N K

heat shock 90kDa protein 1, beta [Homo sapiens]

Charge State: +3

Scan Number: 5727

File Name: HJ050711\_GBMxeno\_bio1\_E\_HANNAH.raw

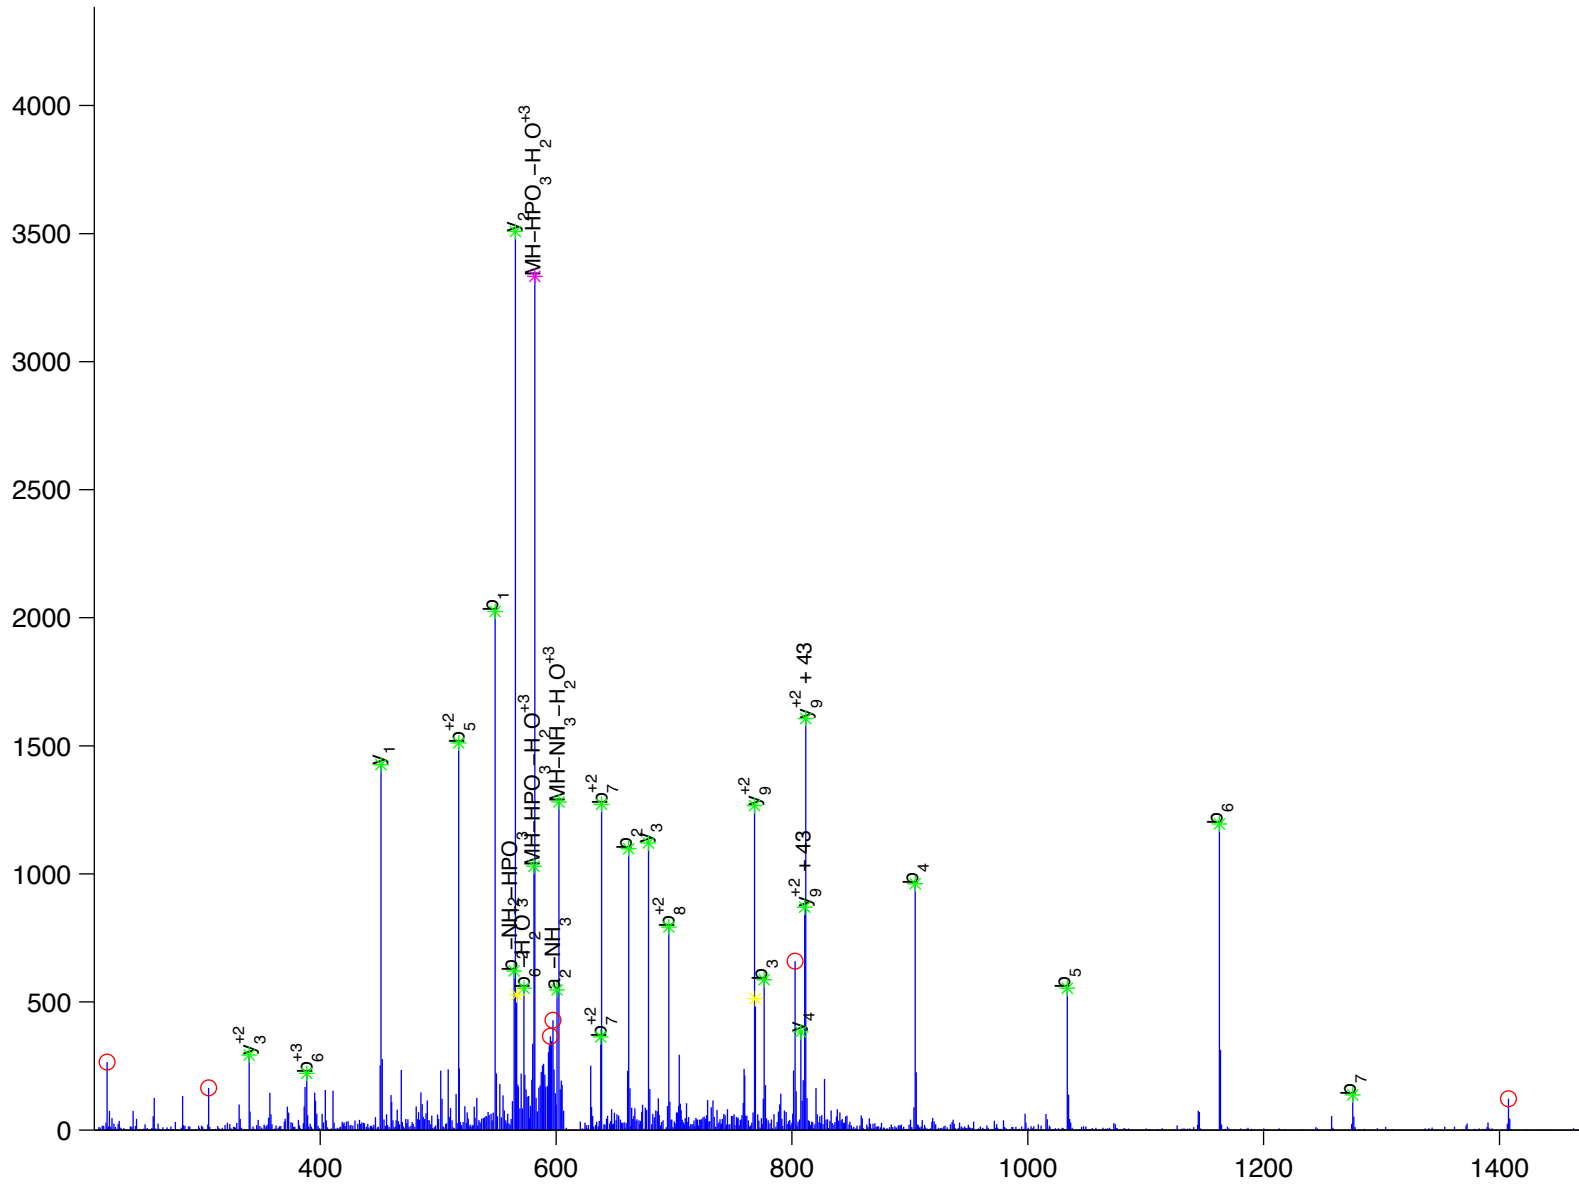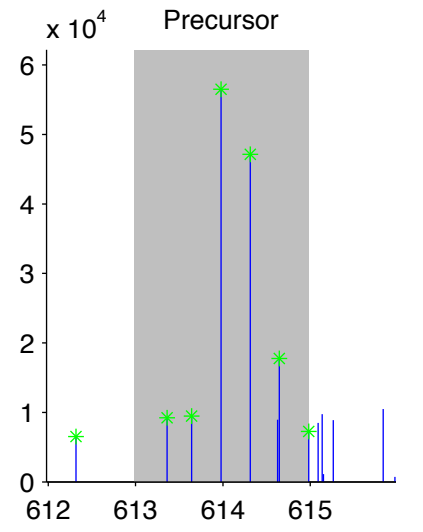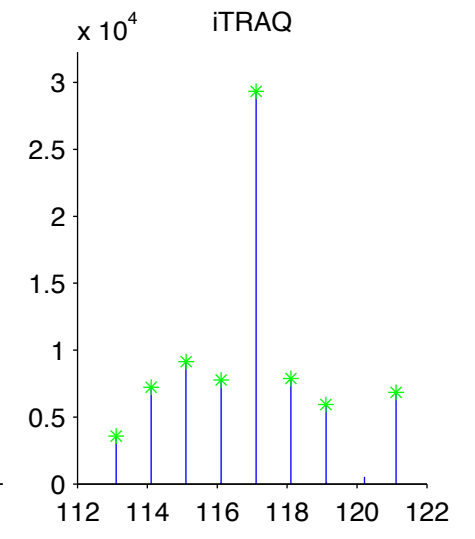



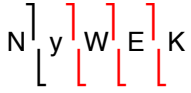

hepatocyte growth factor-regulated tyrosine kinase substrate [Homo sapiens]

Charge State: +3

Scan Number: 5053

File Name: HJ050711\_GBMxeno\_bio1\_E\_HANNAH.raw

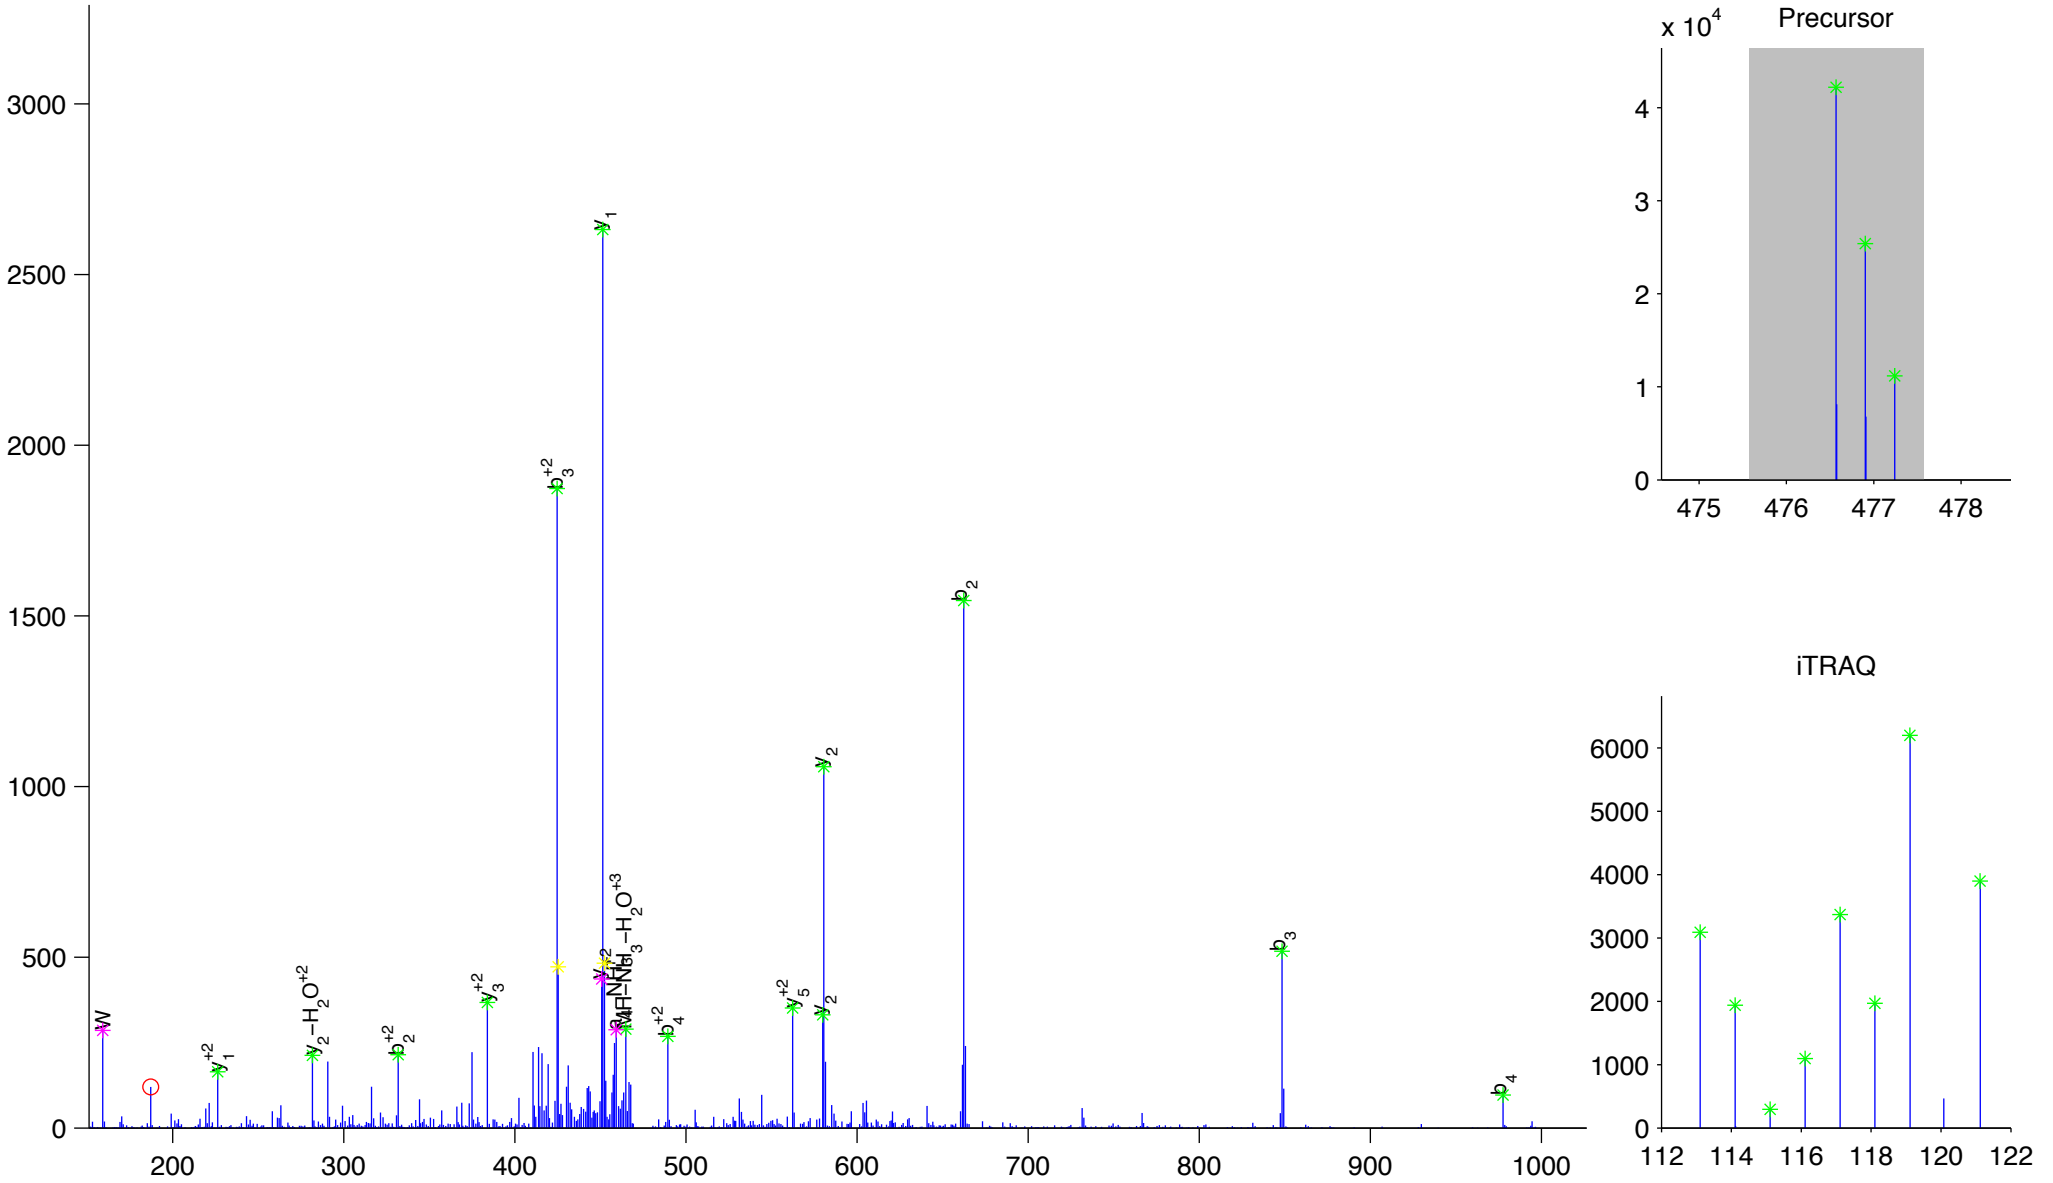

V [ c ] E [ P ] c [ y ] E [ Q ] L [ N ] R

hepatocyte growth factor-regulated tyrosine kinase substrate [Homo sapiens]

Charge State: +3

Scan Number: 5158

File Name: HJ050711\_GBMxeno\_bio1\_E\_HANNAH.raw

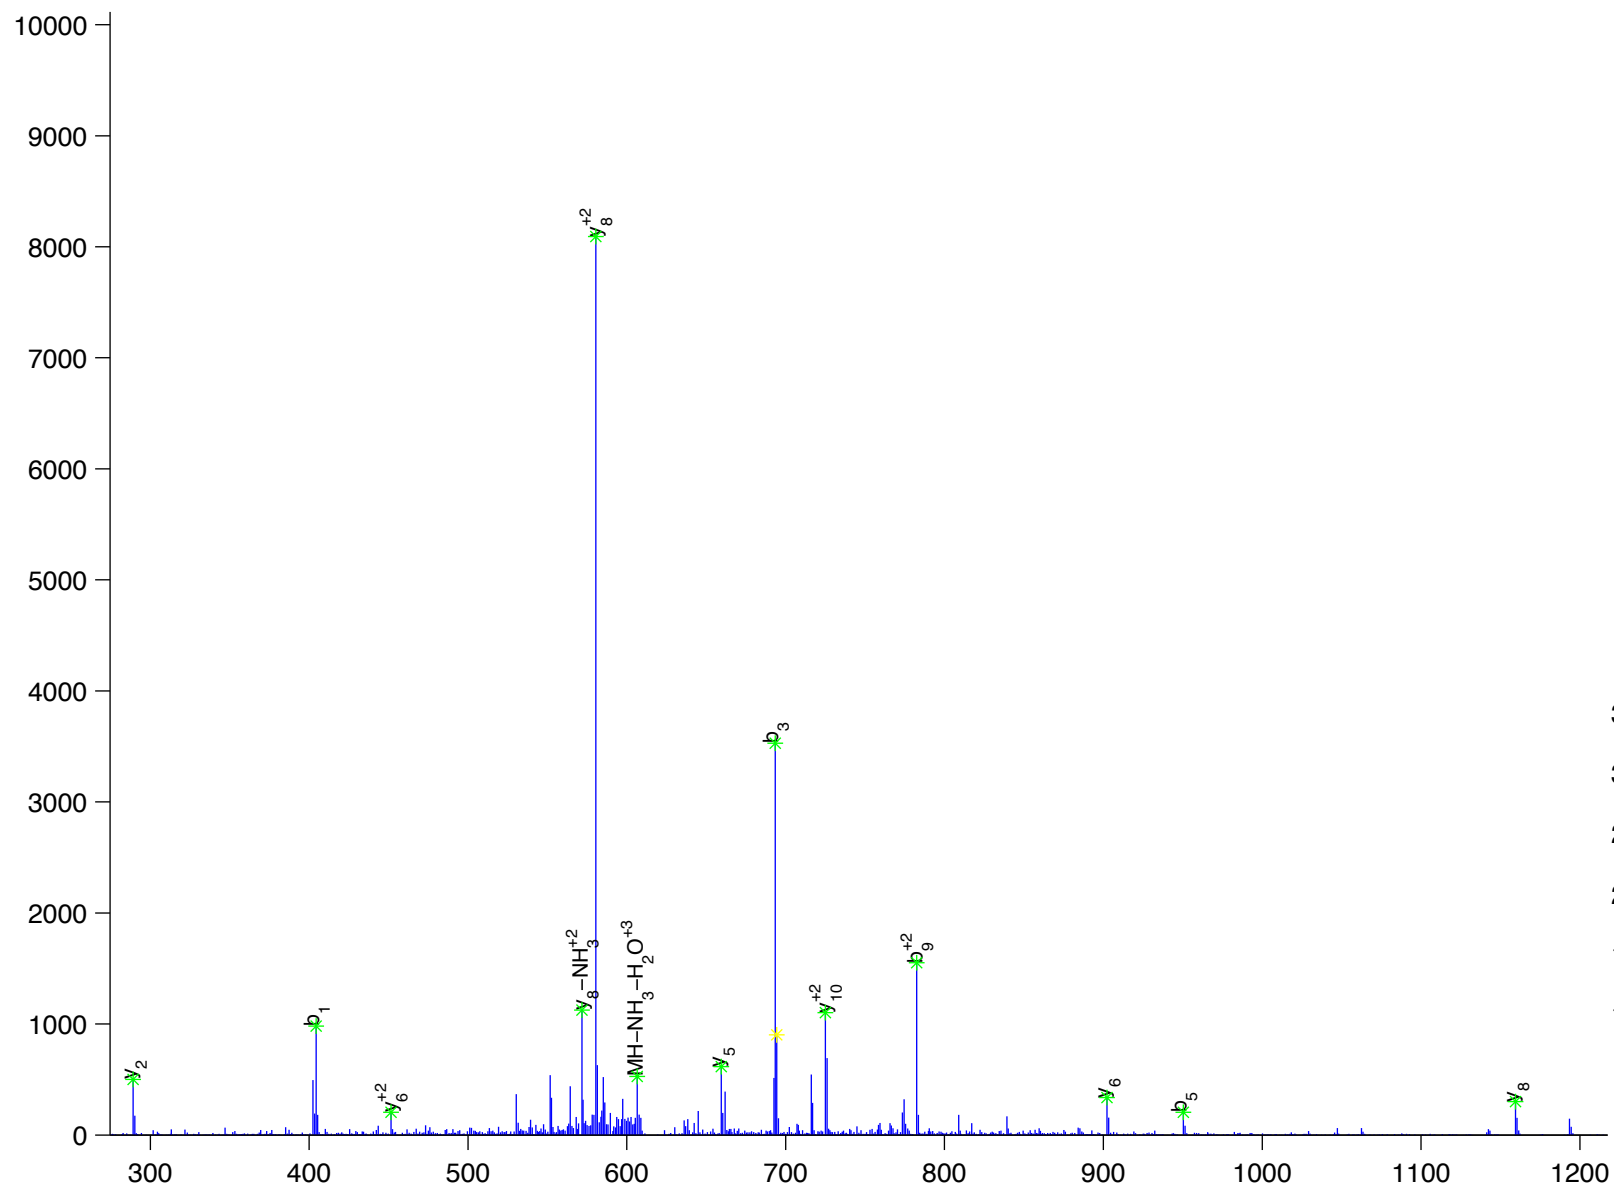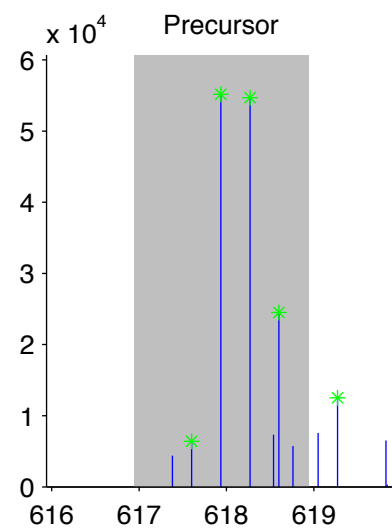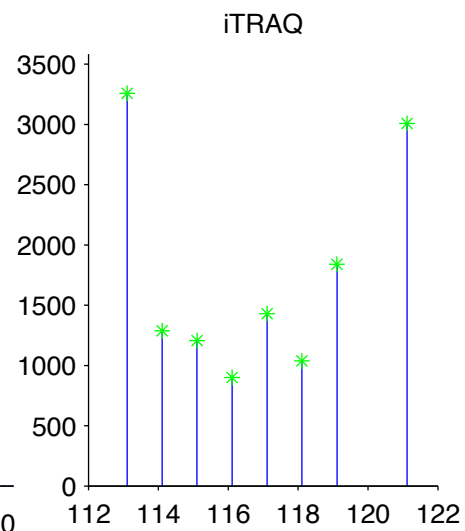

G [ P ] P [ Q ] E [ E ] E [ E ] E [ D ] E [ E ] E [ E ] A [ T ] K [ E ] D [ A ] E [ A ] P [ G ] I [ R ]

hepatoma-derived growth factor (high-mobility group protein 1-like) [Homo sapiens]

Charge State: +4

Scan Number: 5725

File Name: HJ050711\_GBMxeno\_bio1\_E\_HANNAH.raw

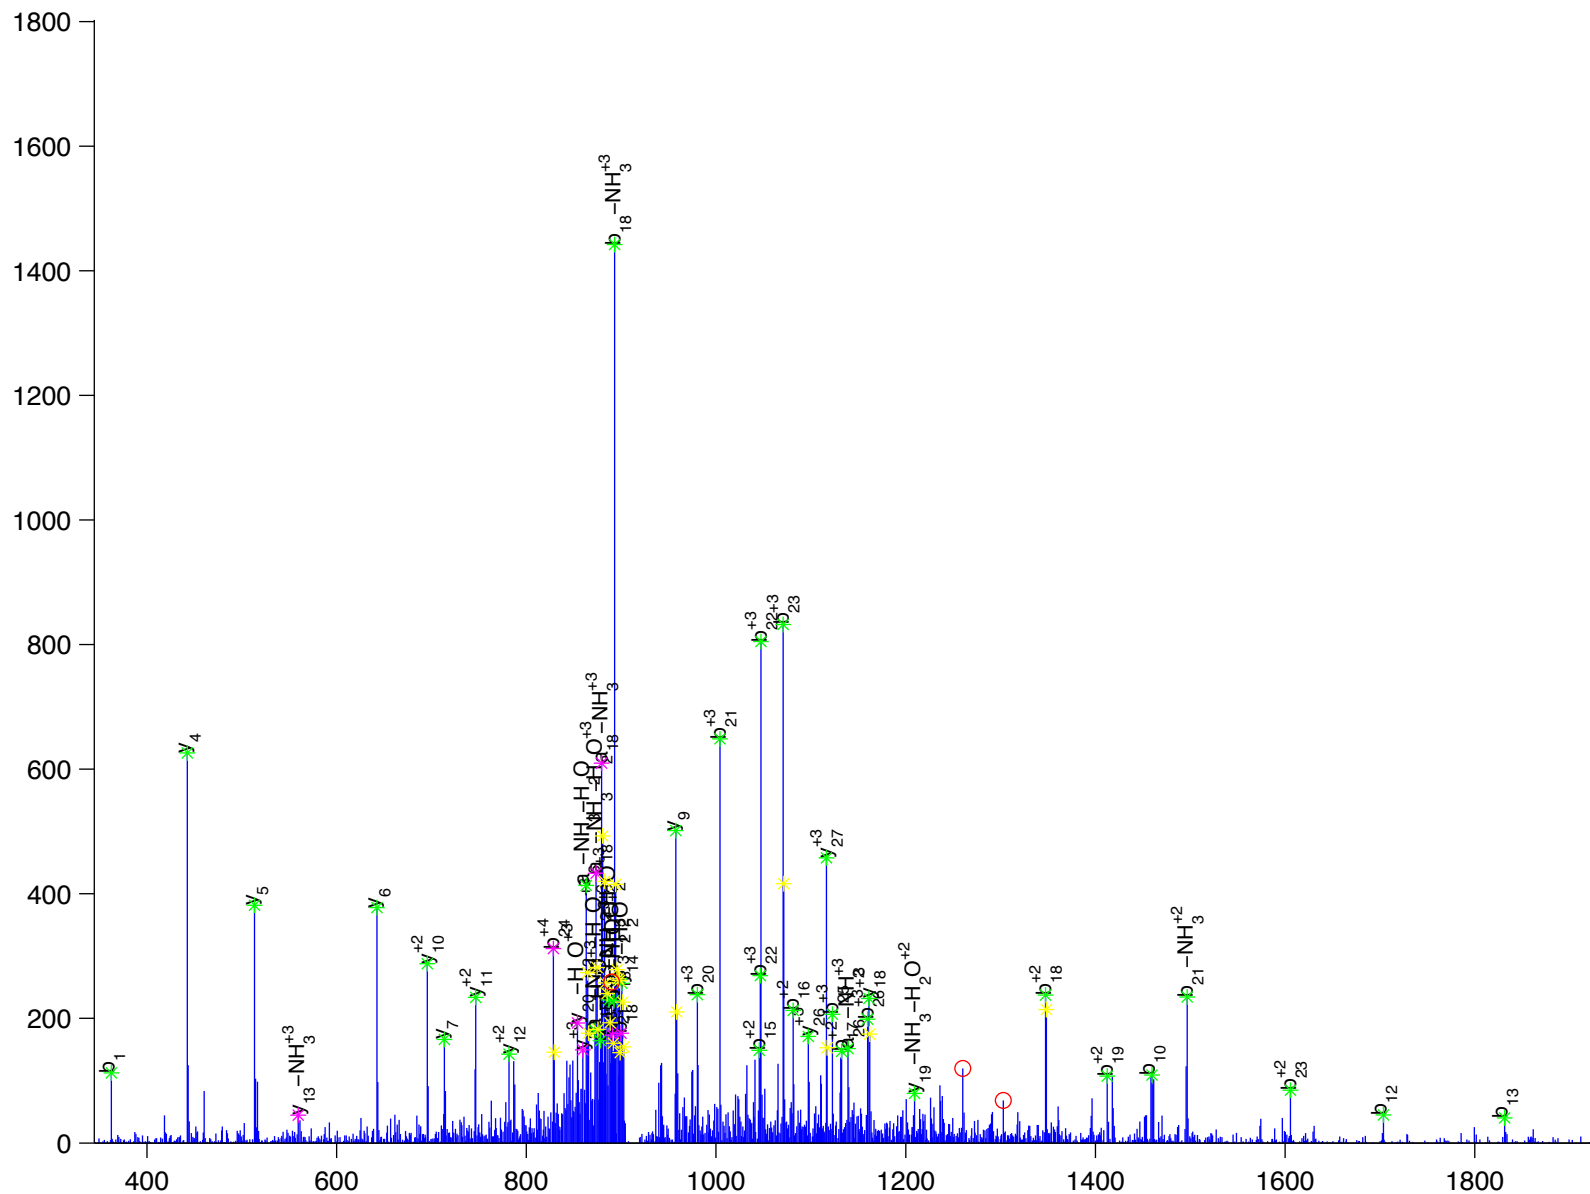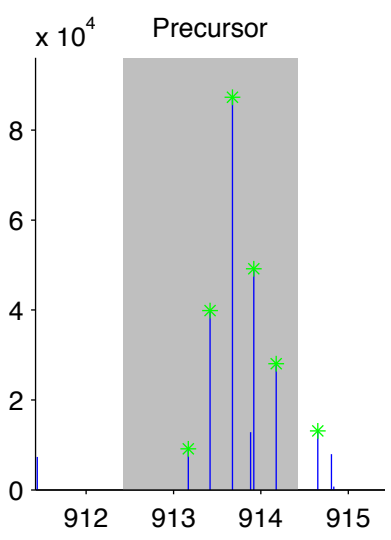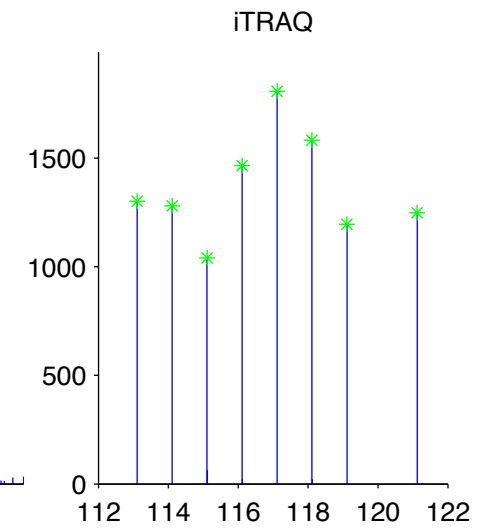

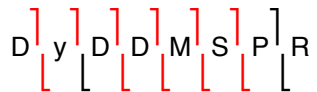

heterogeneous nuclear ribonucleoprotein K isoform b [Homo sapiens]

Charge State: +2

Scan Number: 3522

File Name: HJ050711\_GBMxeno\_bio1\_E\_HANNAH.raw

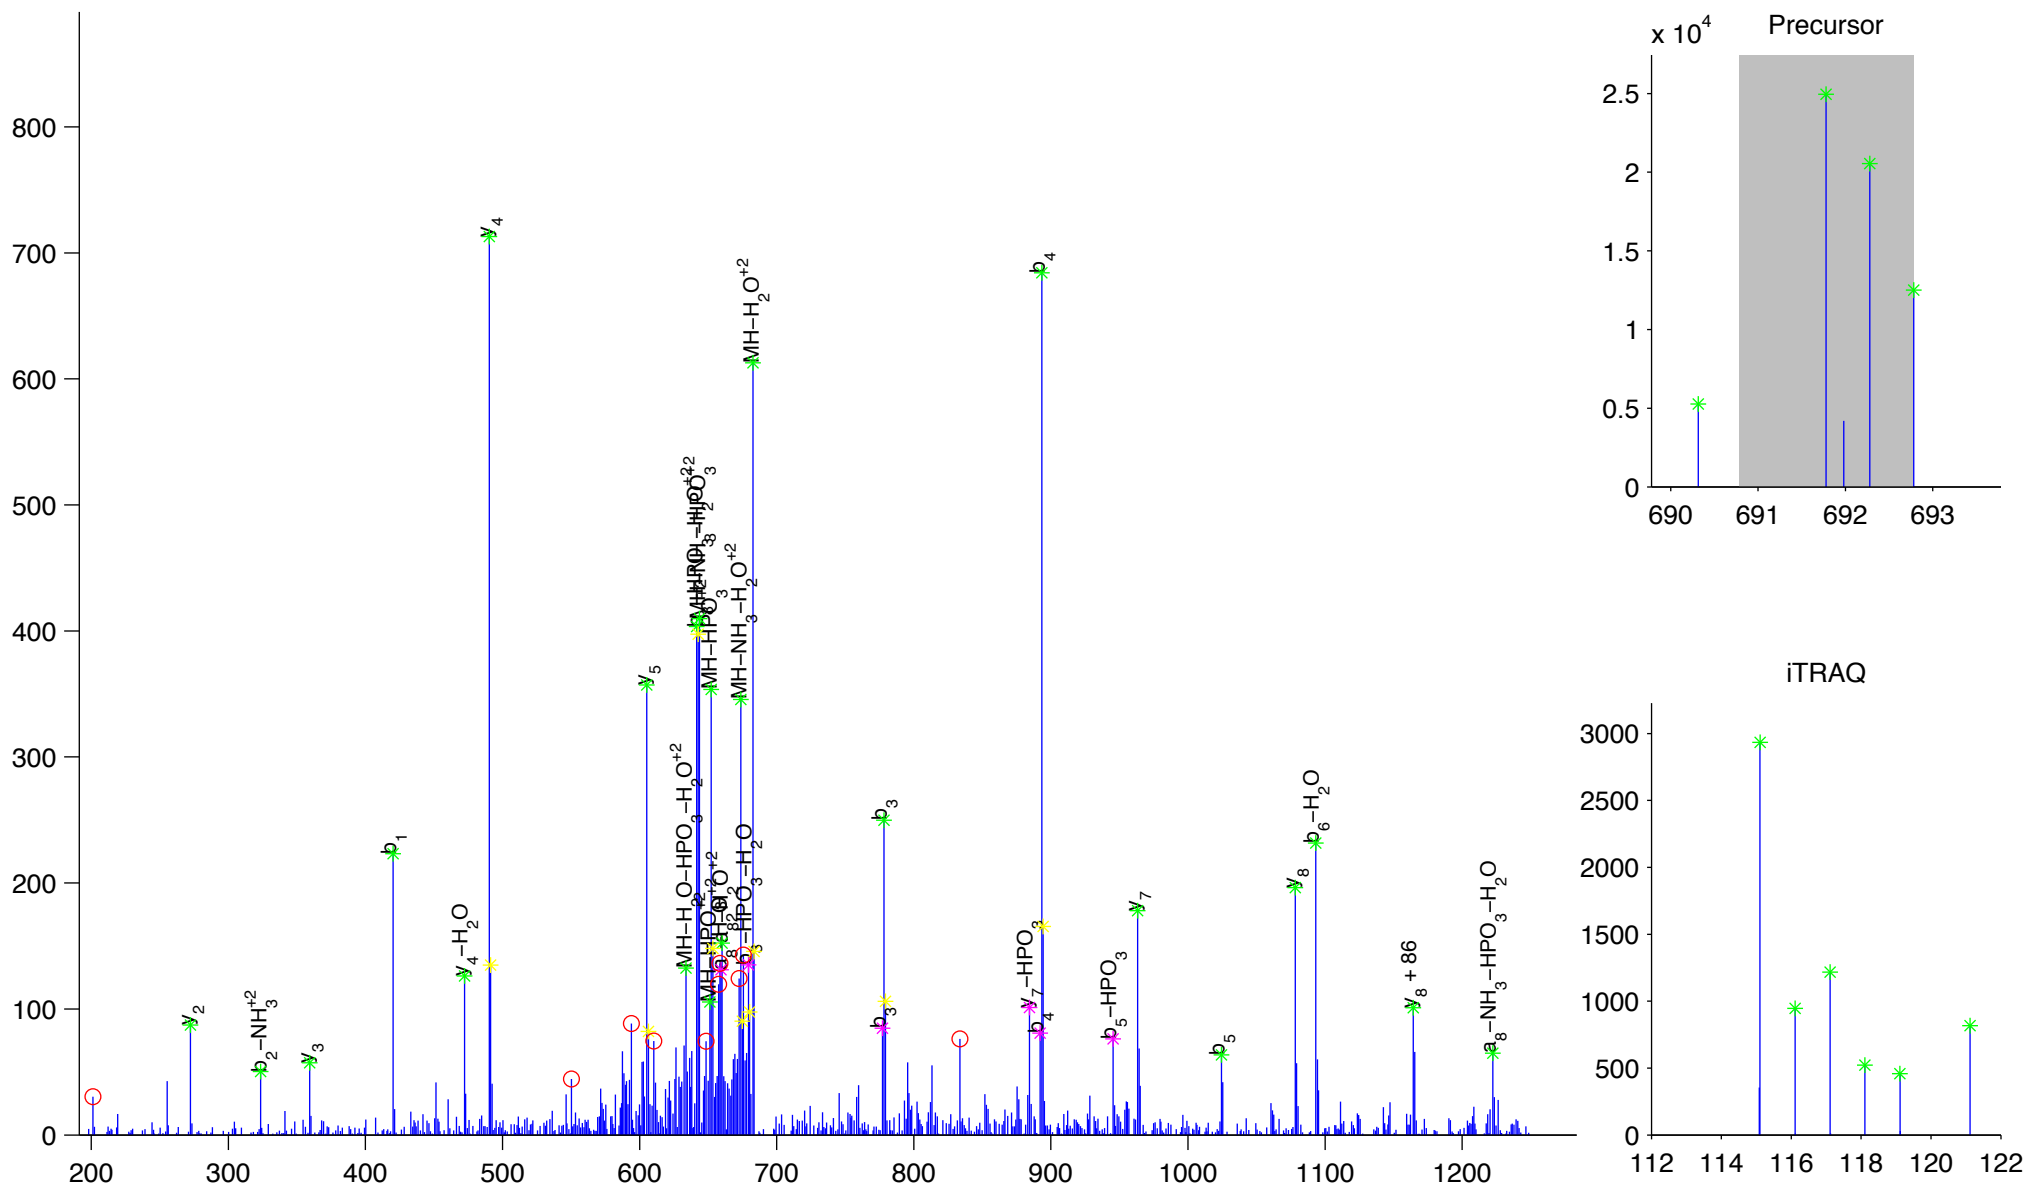

G [ G ] [ D ] [ L ] [ M ] [ A ] y [ D ] [ R ] [ R ]

heterogeneous nuclear ribonucleoprotein K isoform b [Homo sapiens]

Charge State: +3

Scan Number: 4133

File Name: HJ050711\_GBMxeno\_bio1\_E\_HANNAH.raw

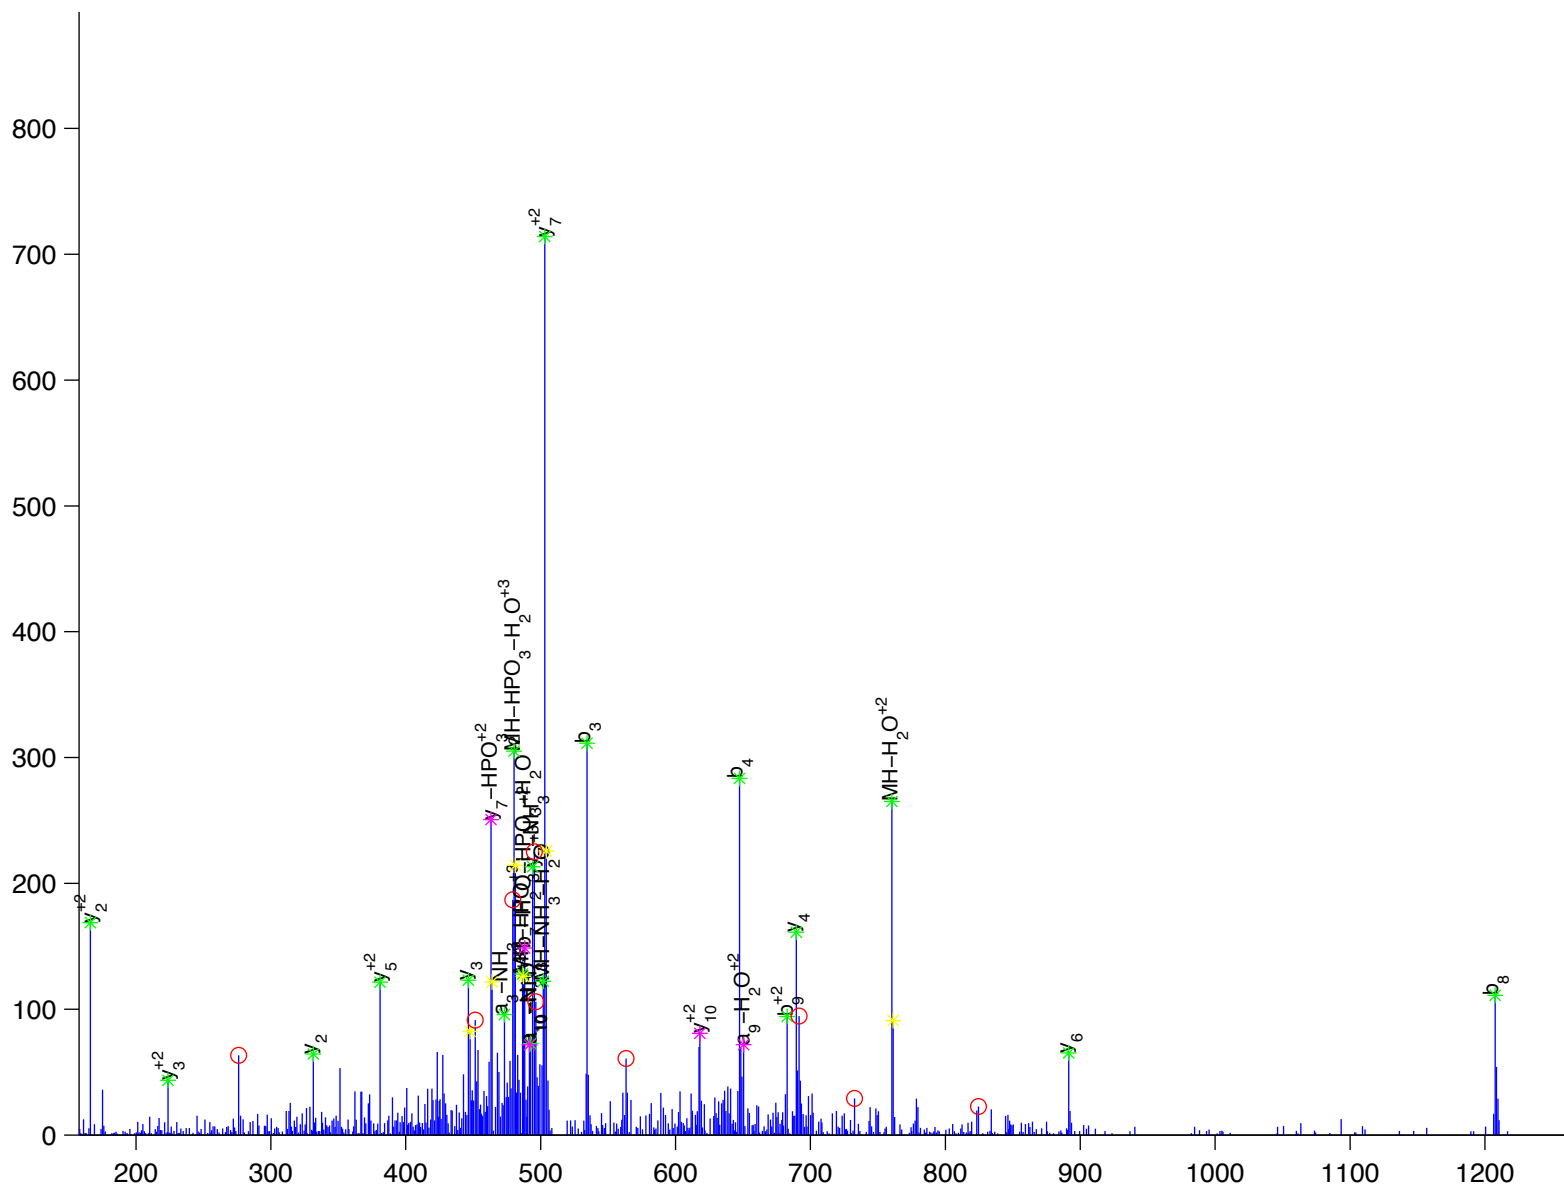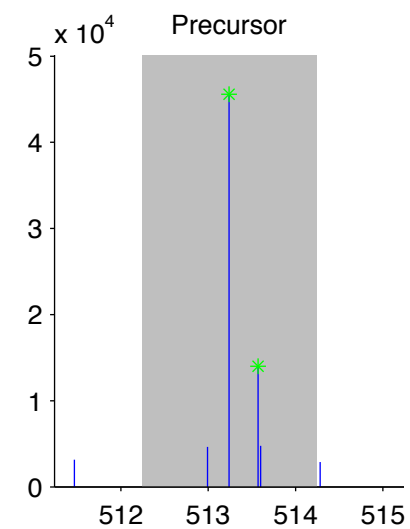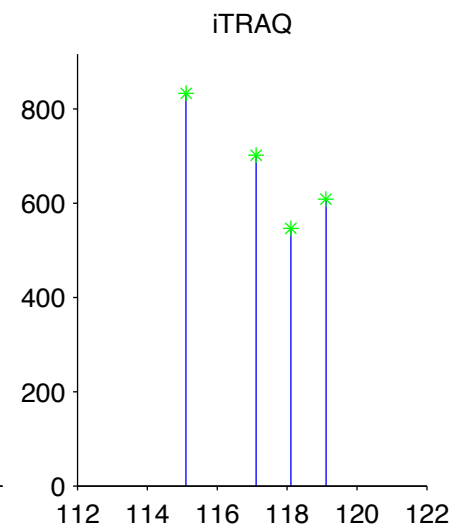

I [ S ] G [ L ] I [ y ] E [ E ] T [ R ]

histone cluster 1, H4a [Homo sapiens]

Charge State: +2

Scan Number: 9314

File Name: HJ050711\_GBMxeno\_bio1\_E\_HANNAH.raw

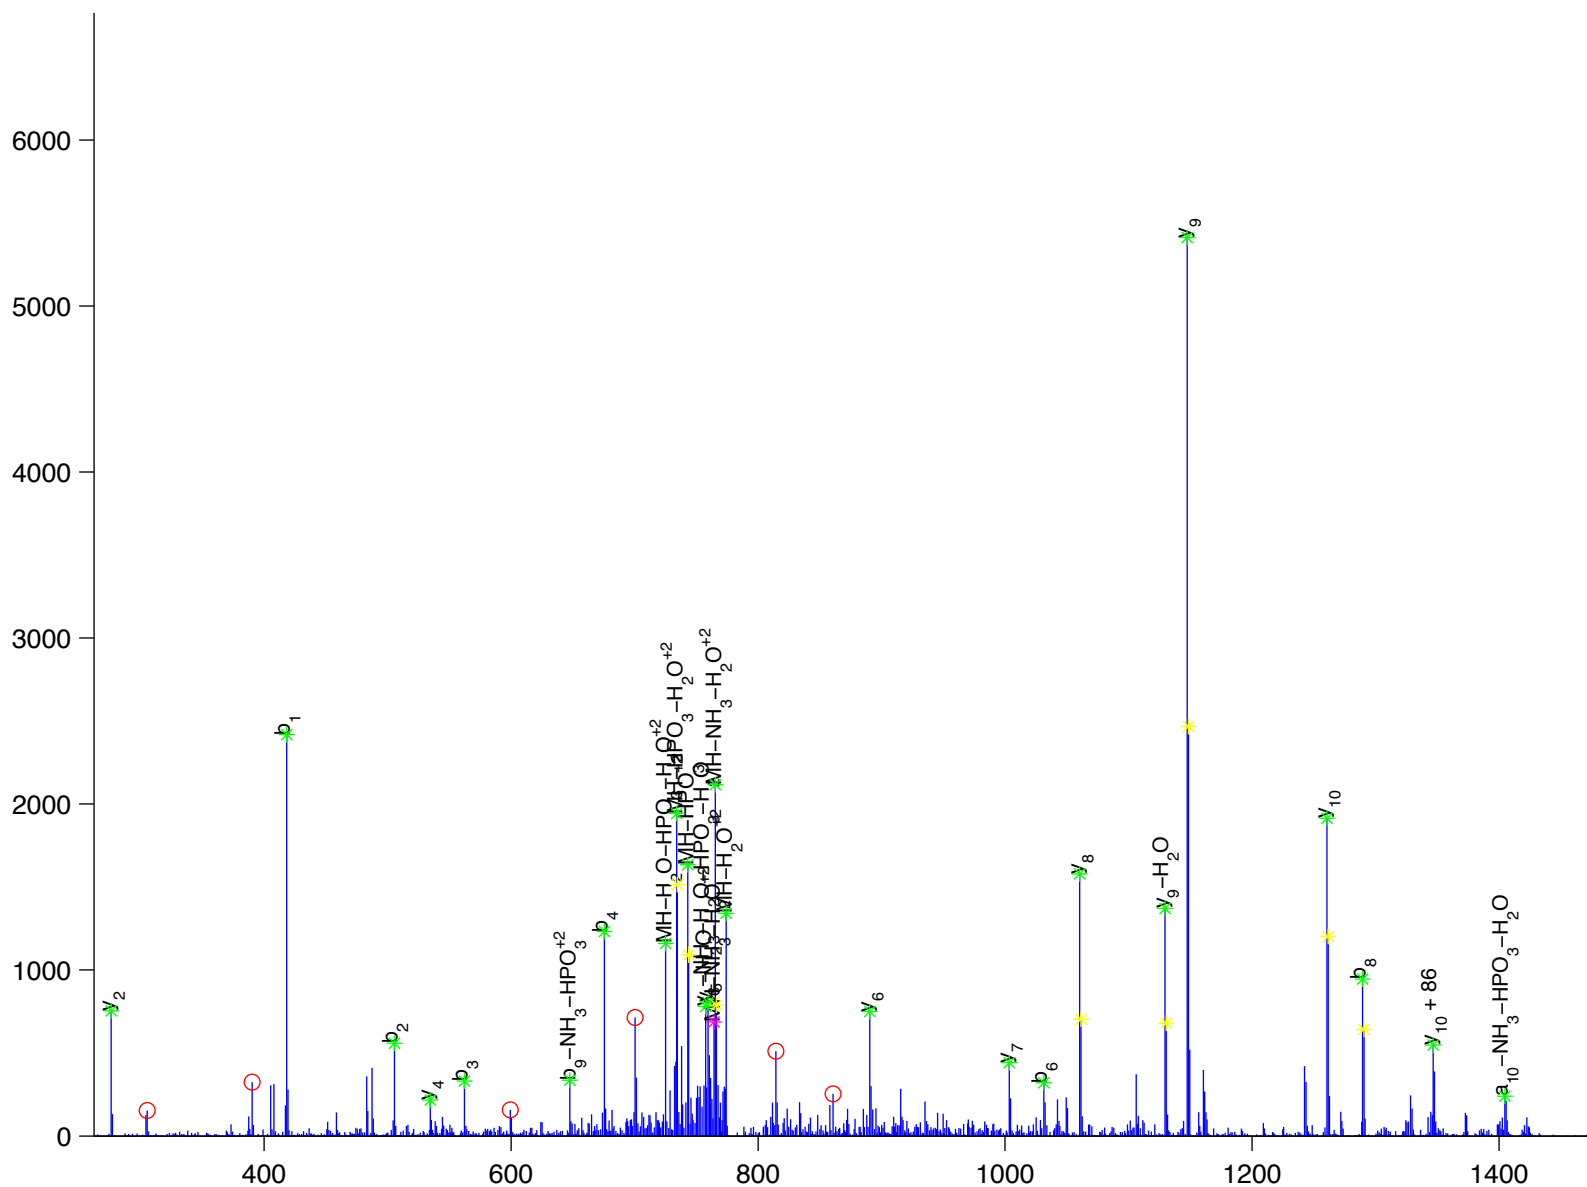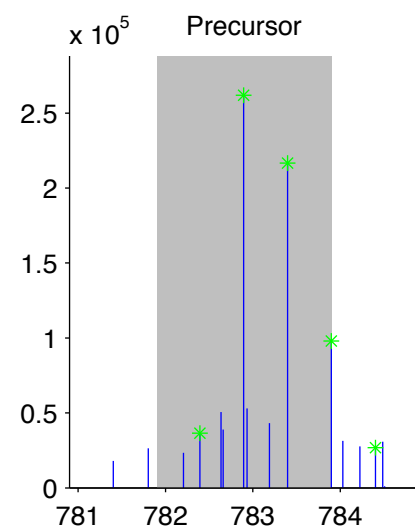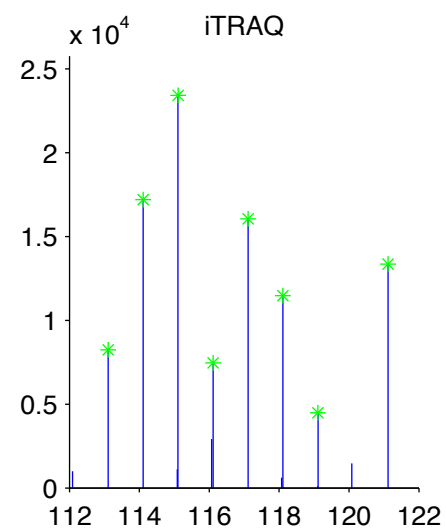

T[V]c[S]T[y]L[Q]S[R]

homeodomain interacting protein kinase 3 isoform 1 [Homo sapiens]

Charge State: +2

Scan Number: 4352

File Name: HJ050711\_GBMxeno\_bio1\_E\_HANNAH.raw

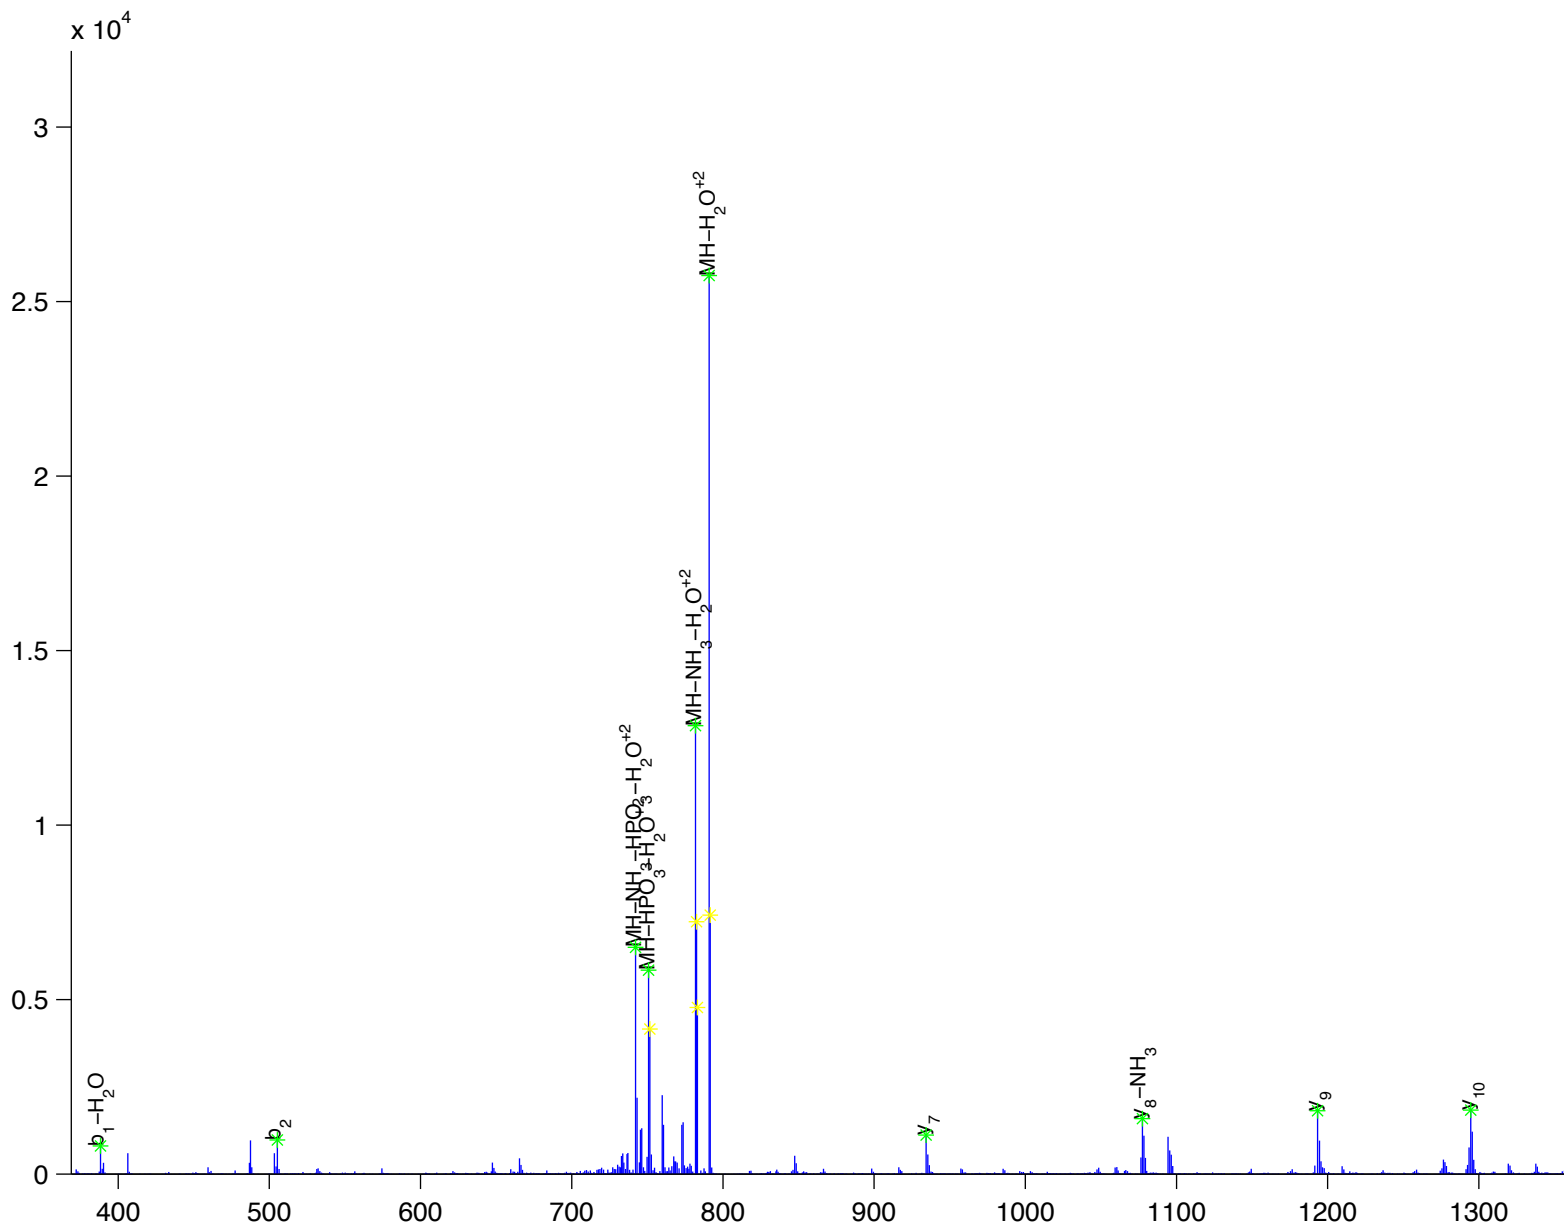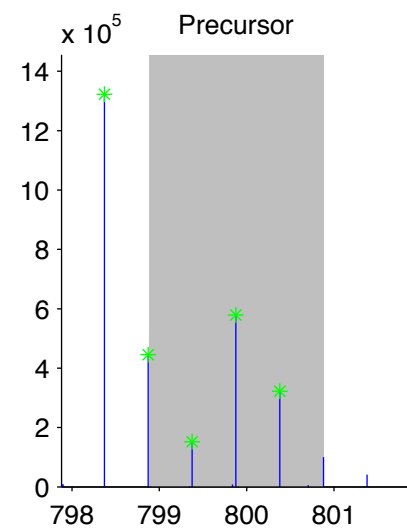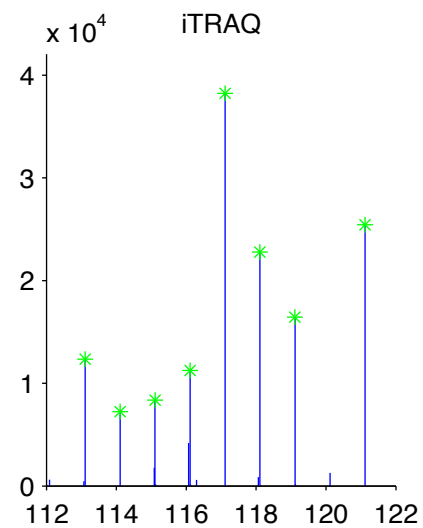

A [ V ] c [ S ] T [ y ] L [ Q ] S [ R ]

homeodomain-interacting protein kinase 1 isoform 2 [Homo sapiens]

Charge State: +2

Scan Number: 4434

File Name: HJ050711\_GBMxeno\_bio1\_E\_HANNAH.raw

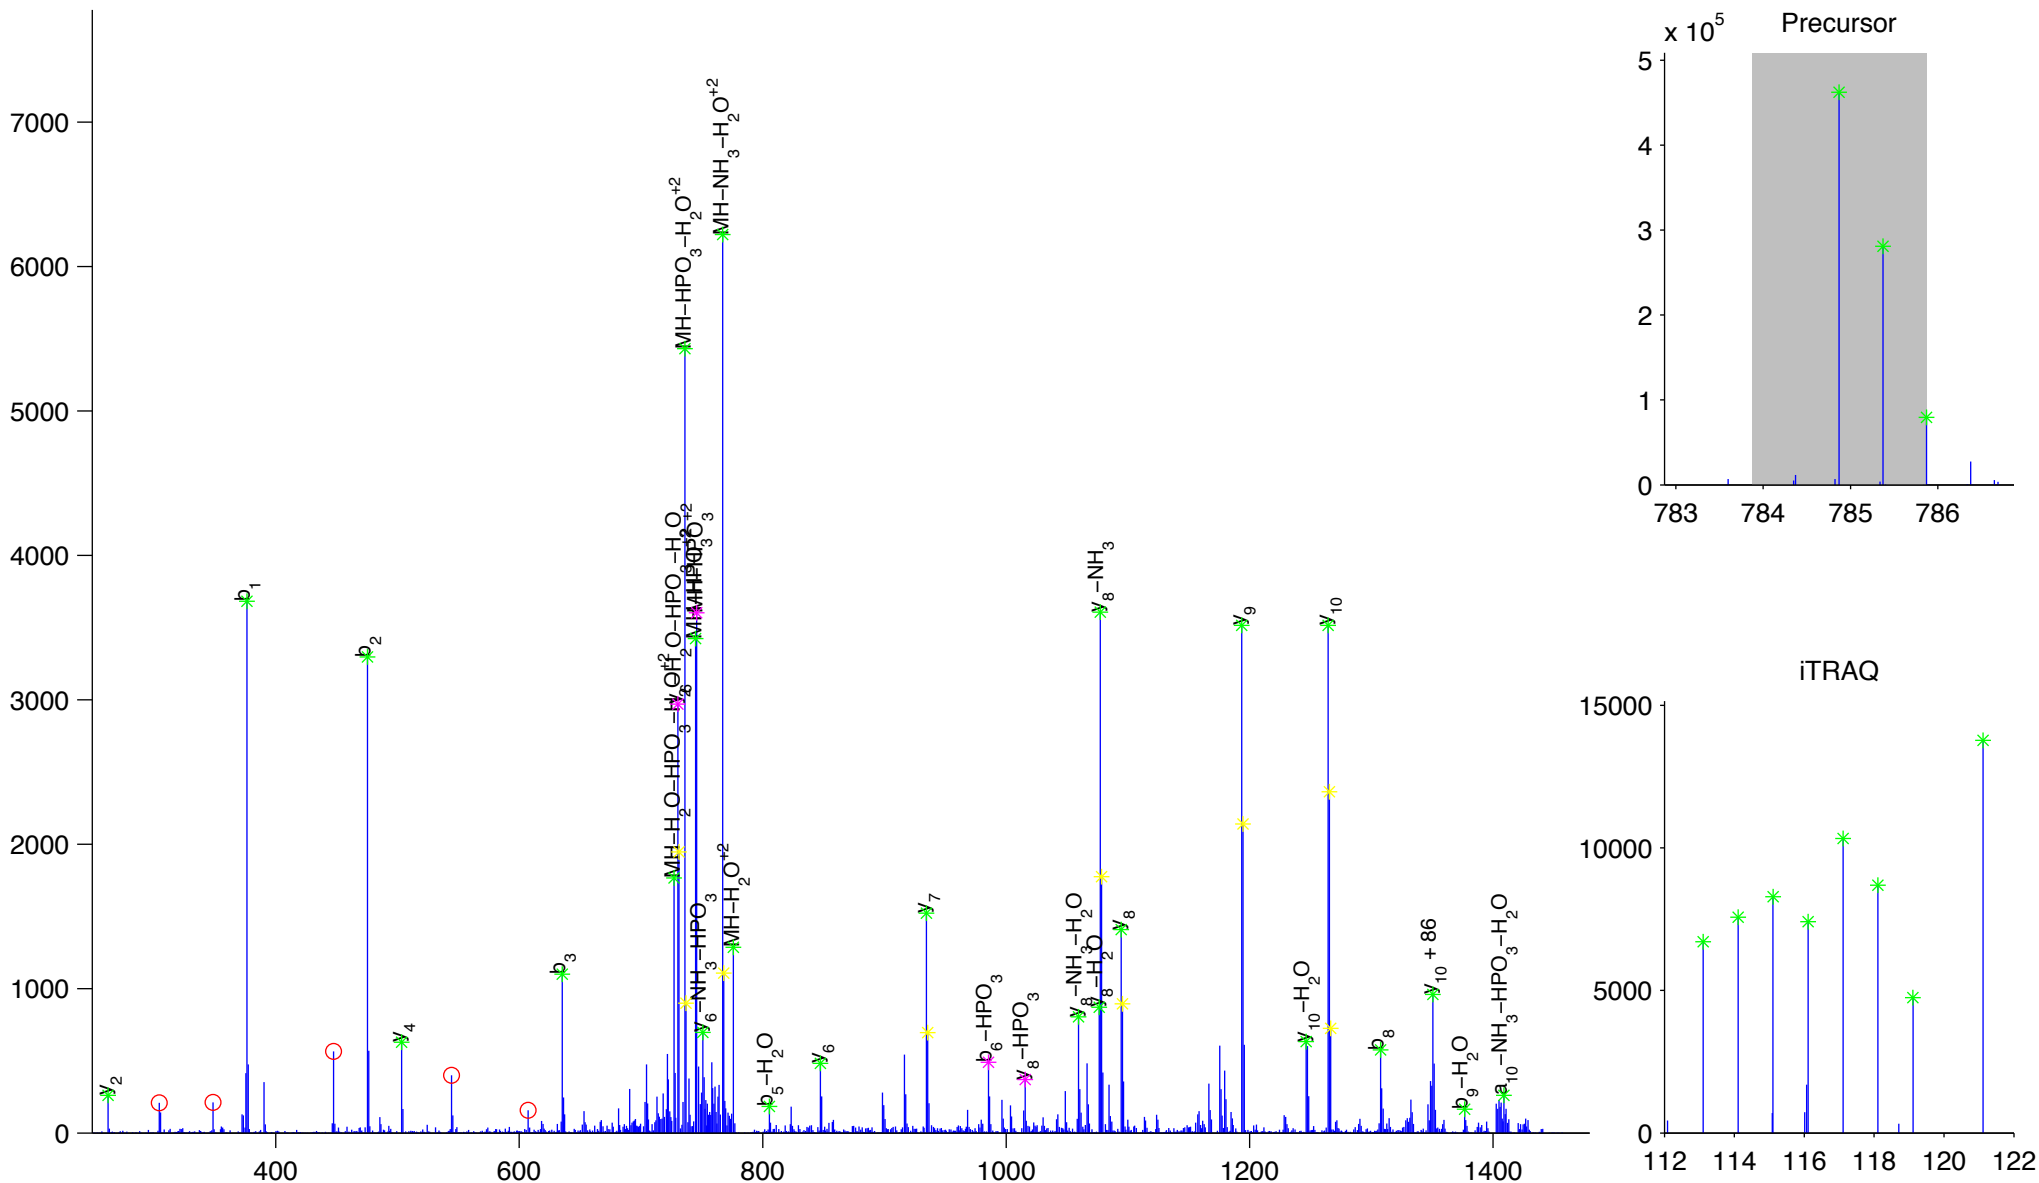



A [ V ] c [ S ] T [ y ] L [ Q ] S [ R ]

homeodomain-interacting protein kinase 1 isoform 2 [Homo sapiens]

Charge State: +2

Scan Number: 4524

File Name: HJ050711\_GBMxeno\_bio1\_E\_HANNAH.raw

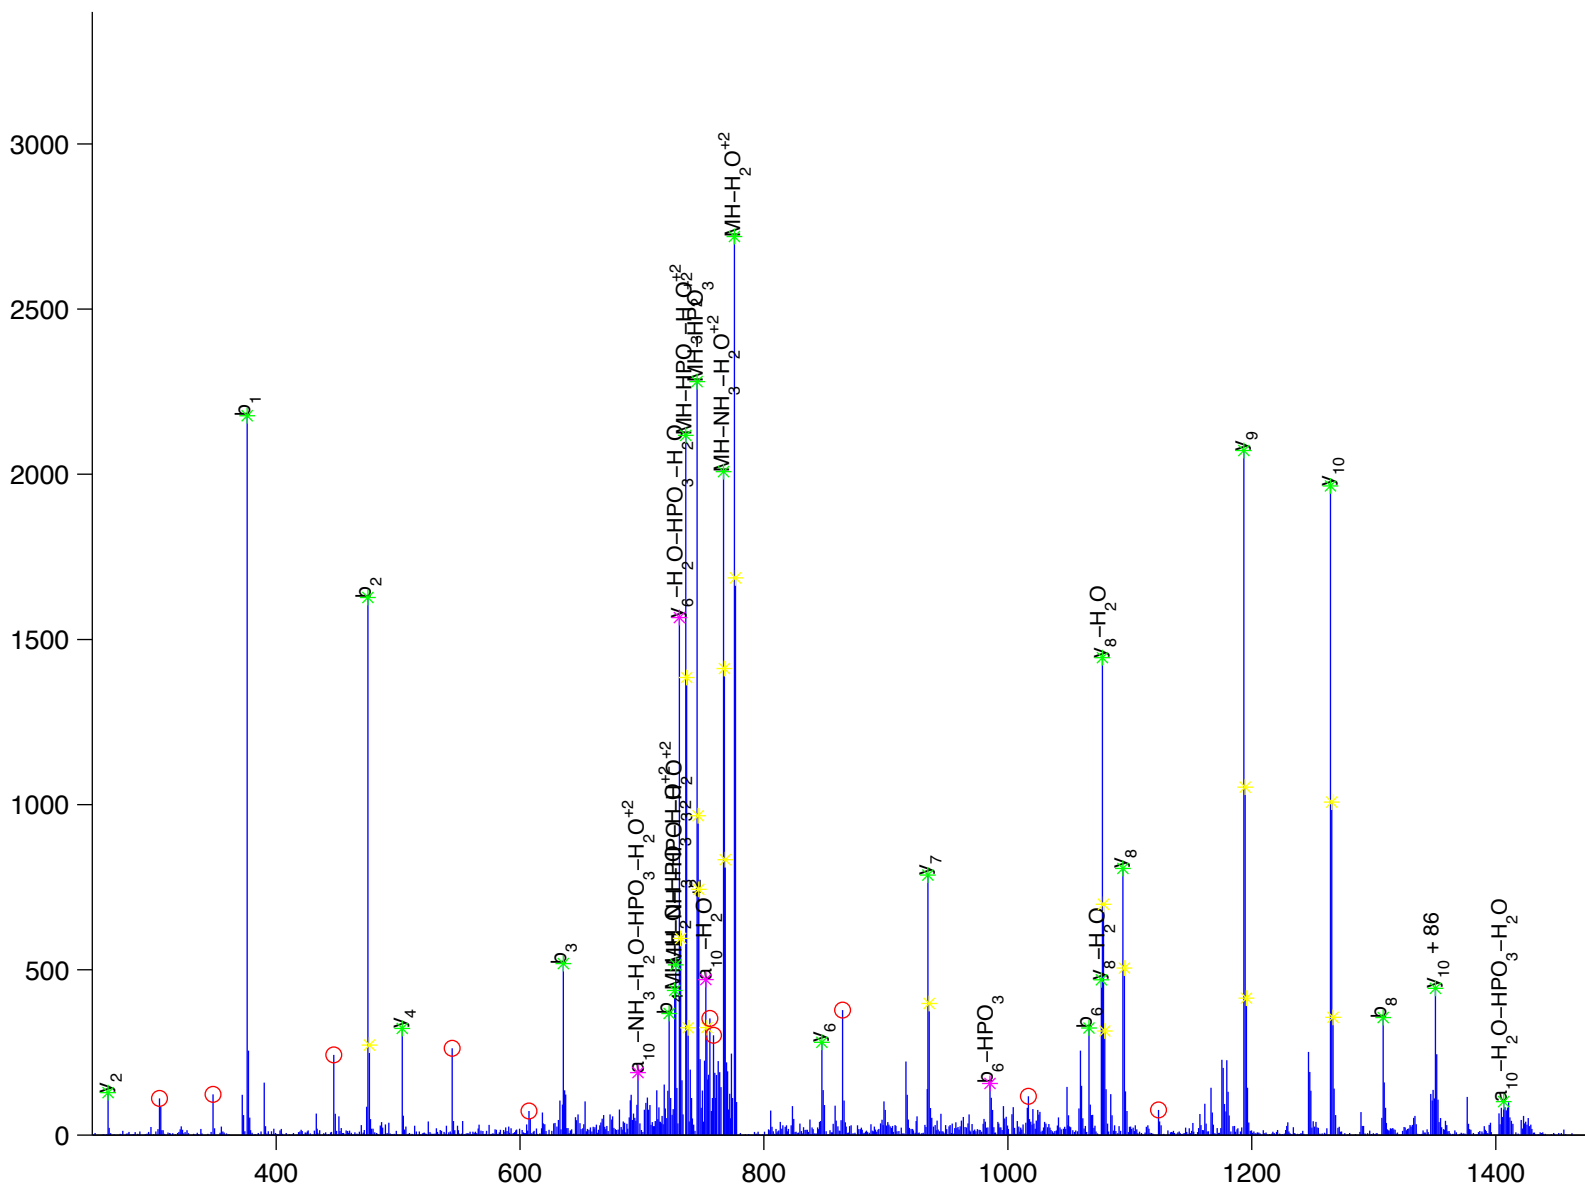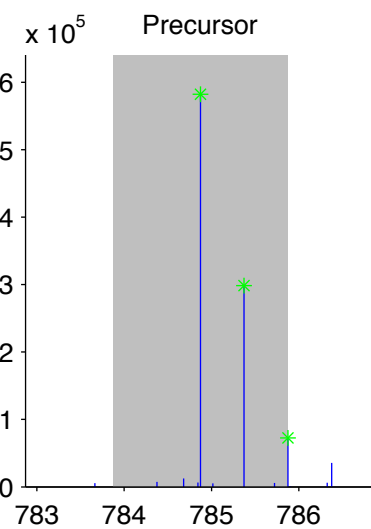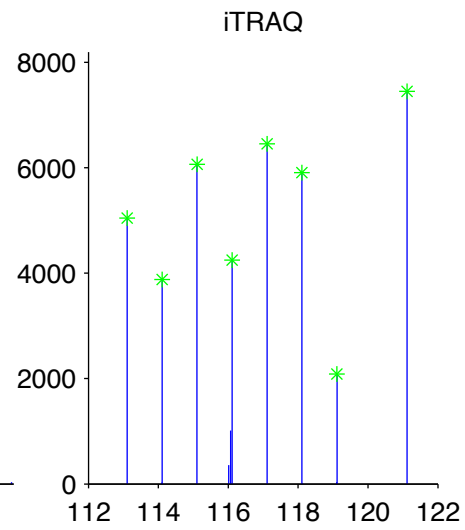

G [ R ] A [ P ] t [ G ] c [ H ] G [ E ] S [ R ]

hypothetical protein LOC401827 [Homo sapiens]

Charge State: +2

Scan Number: 5330

File Name: HJ050711\_GBMxeno\_bio1\_E\_HANNAH.raw

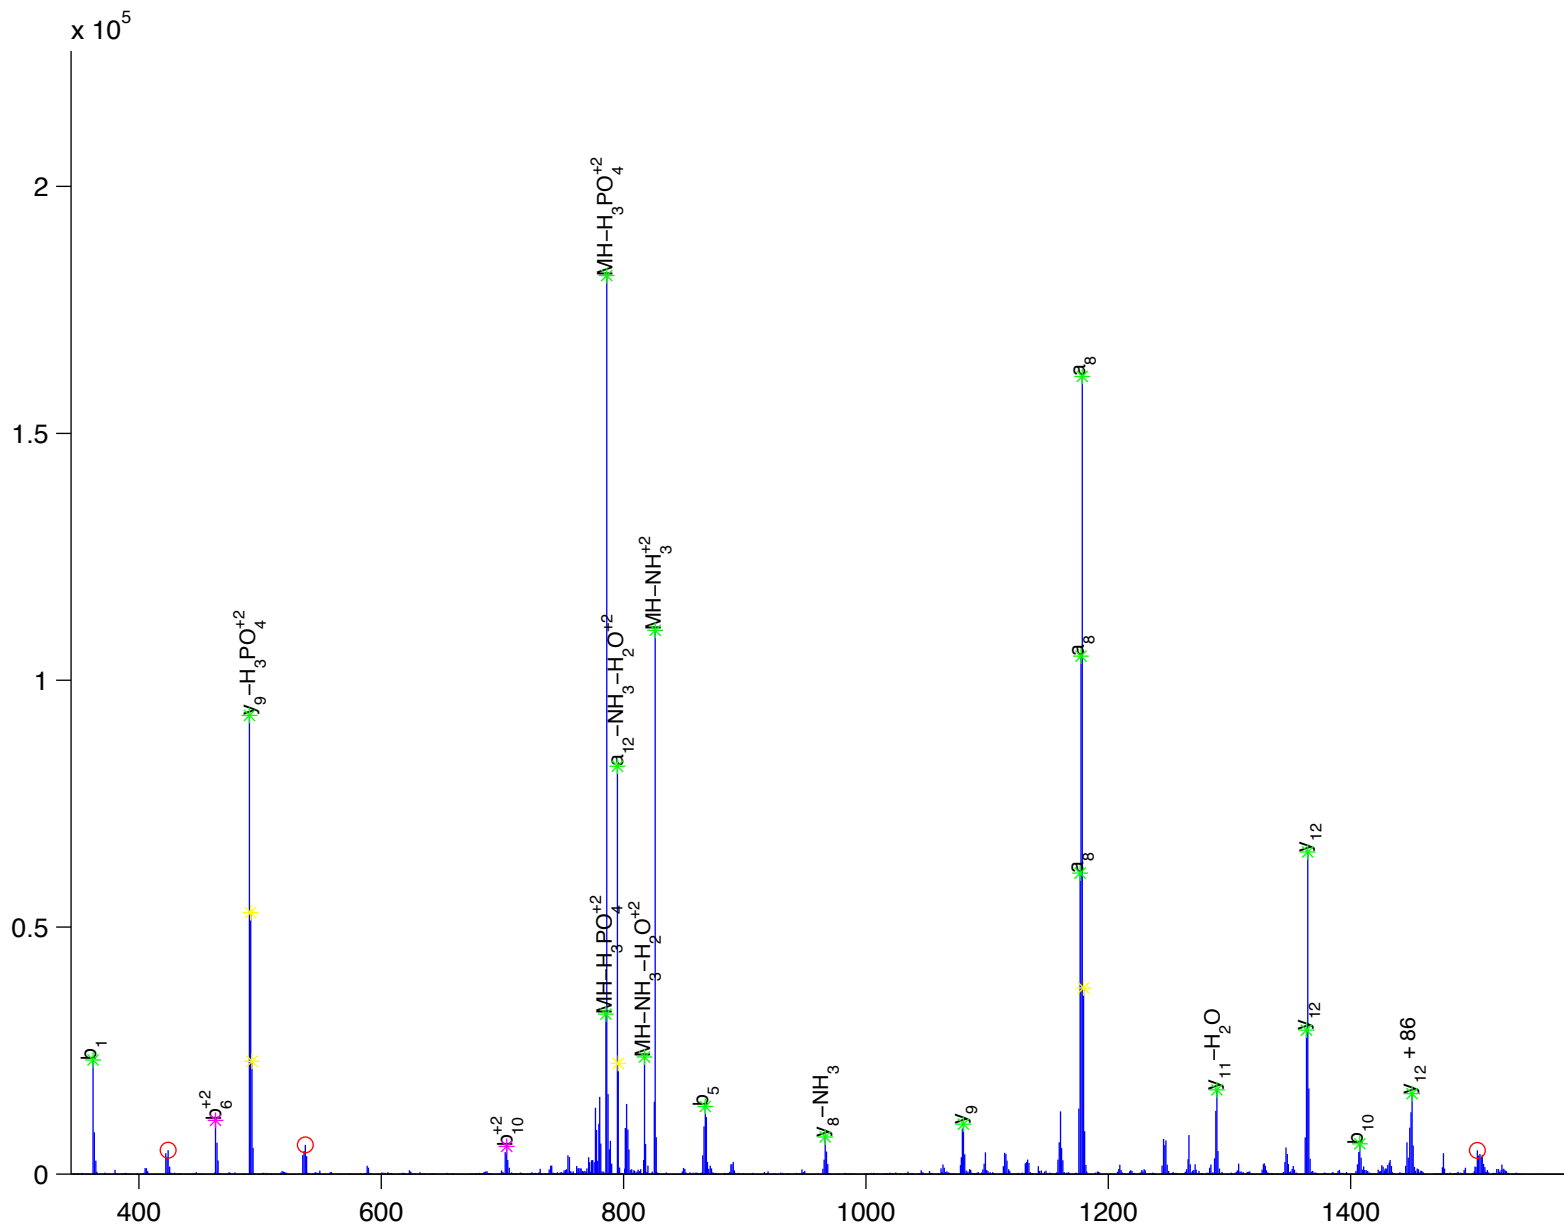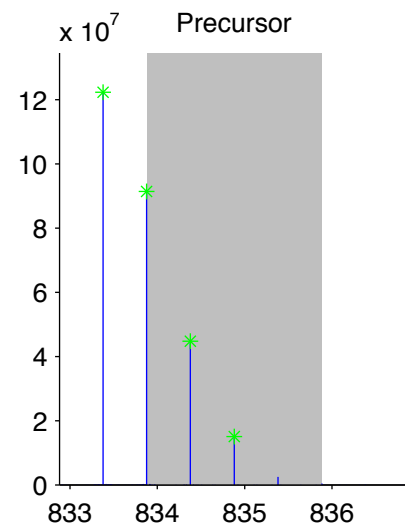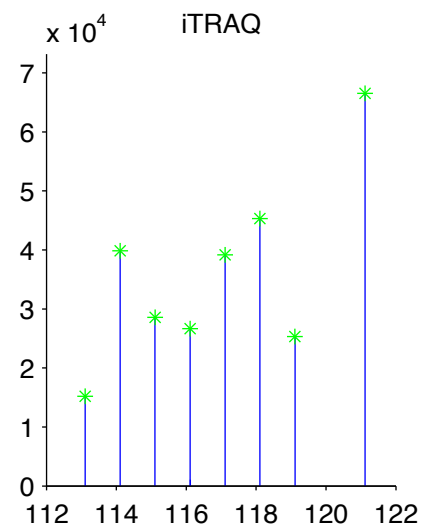

D [ H V V E G E P Y A G ] y [ D ] R

hypothetical protein LOC9917 [Homo sapiens]

Charge State: +3

Scan Number: 4072

File Name: HJ050711\_GBMxeno\_bio1\_E\_HANNAH.raw

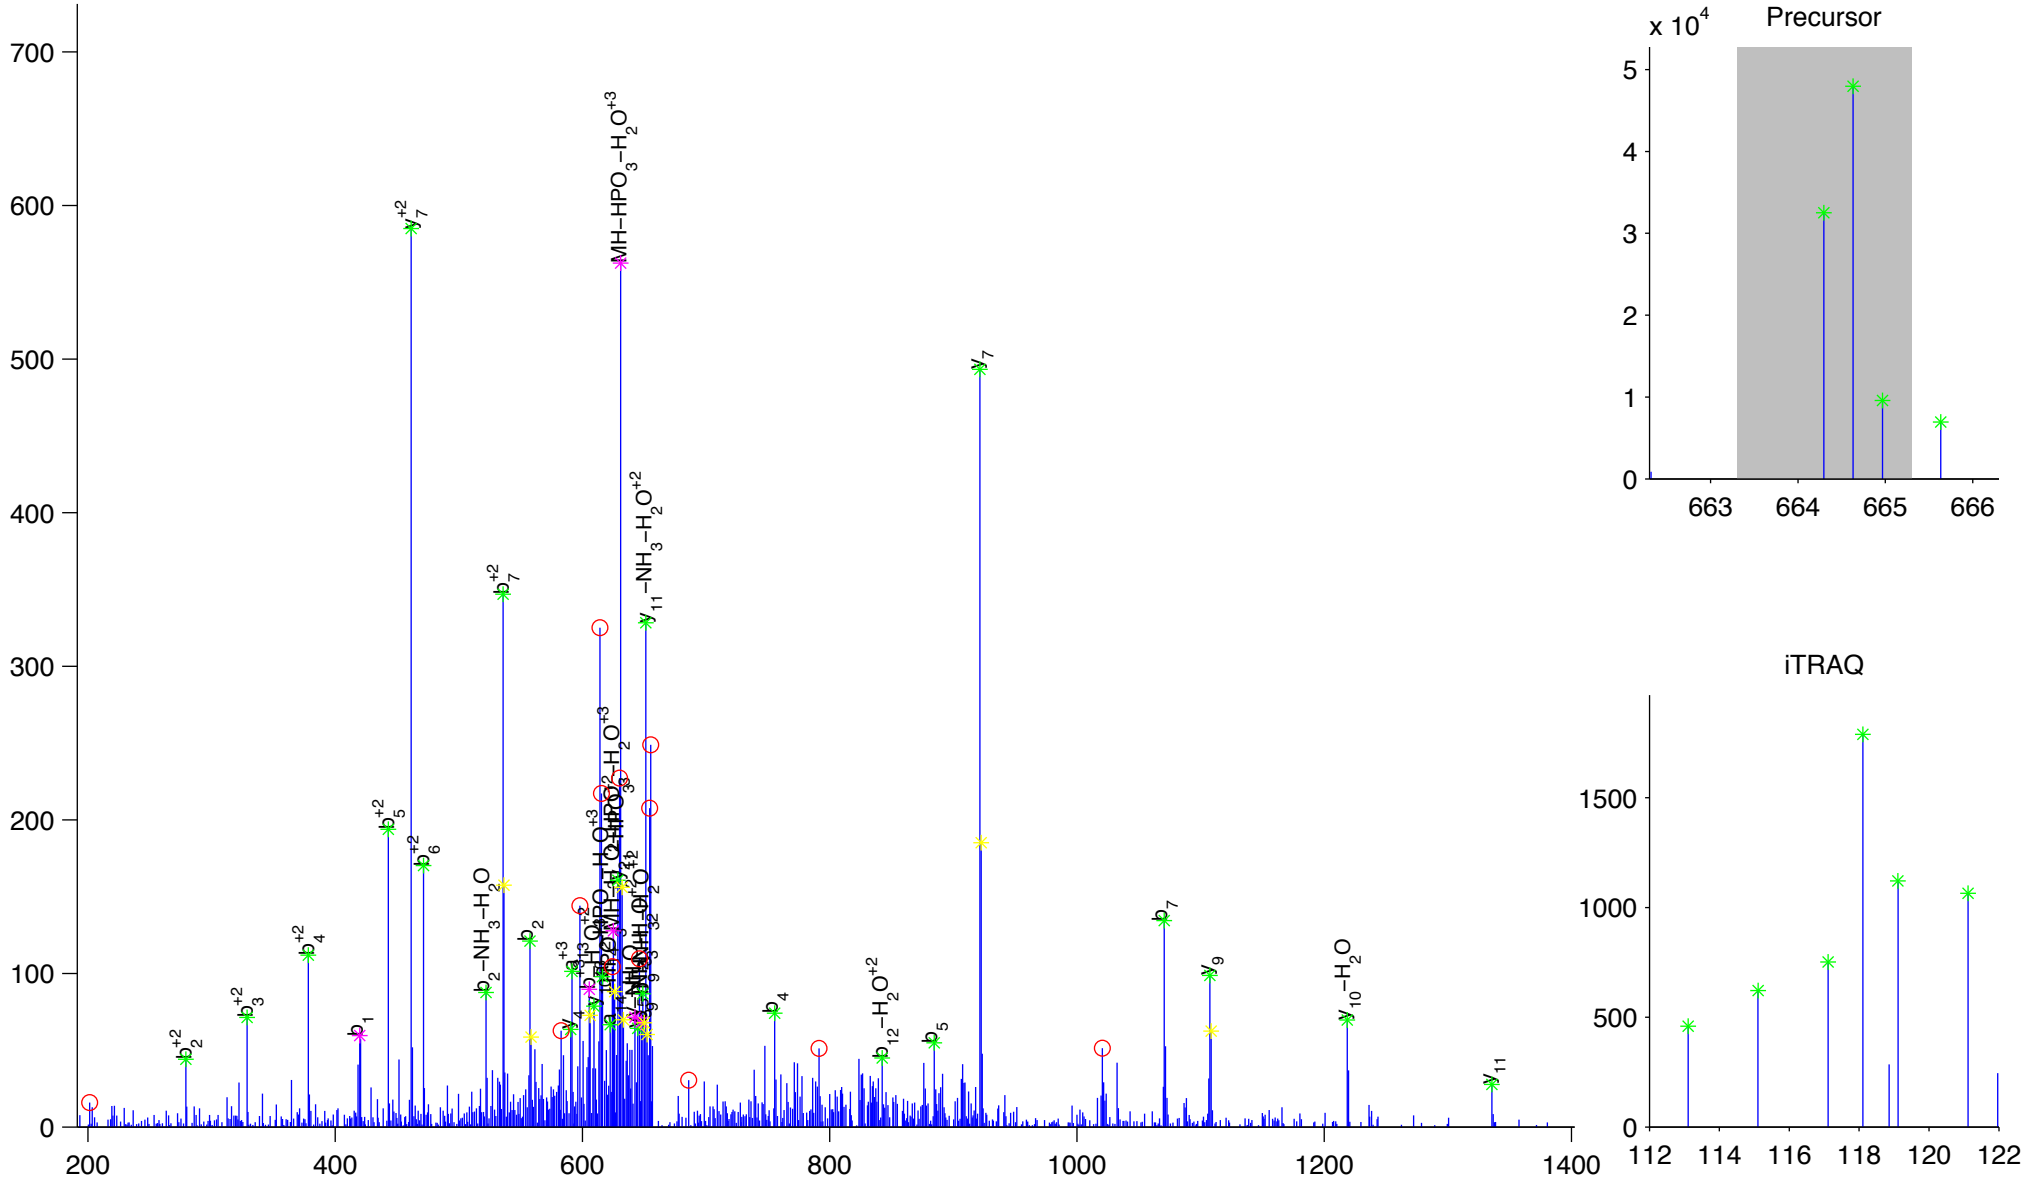

M[V]V[E]S[A]y[E]V[I]K

lactate dehydrogenase B [Homo sapiens]

Charge State: +3

Scan Number: 8048

File Name: HJ050711\_GBMxeno\_bio1\_E\_HANNAH.raw

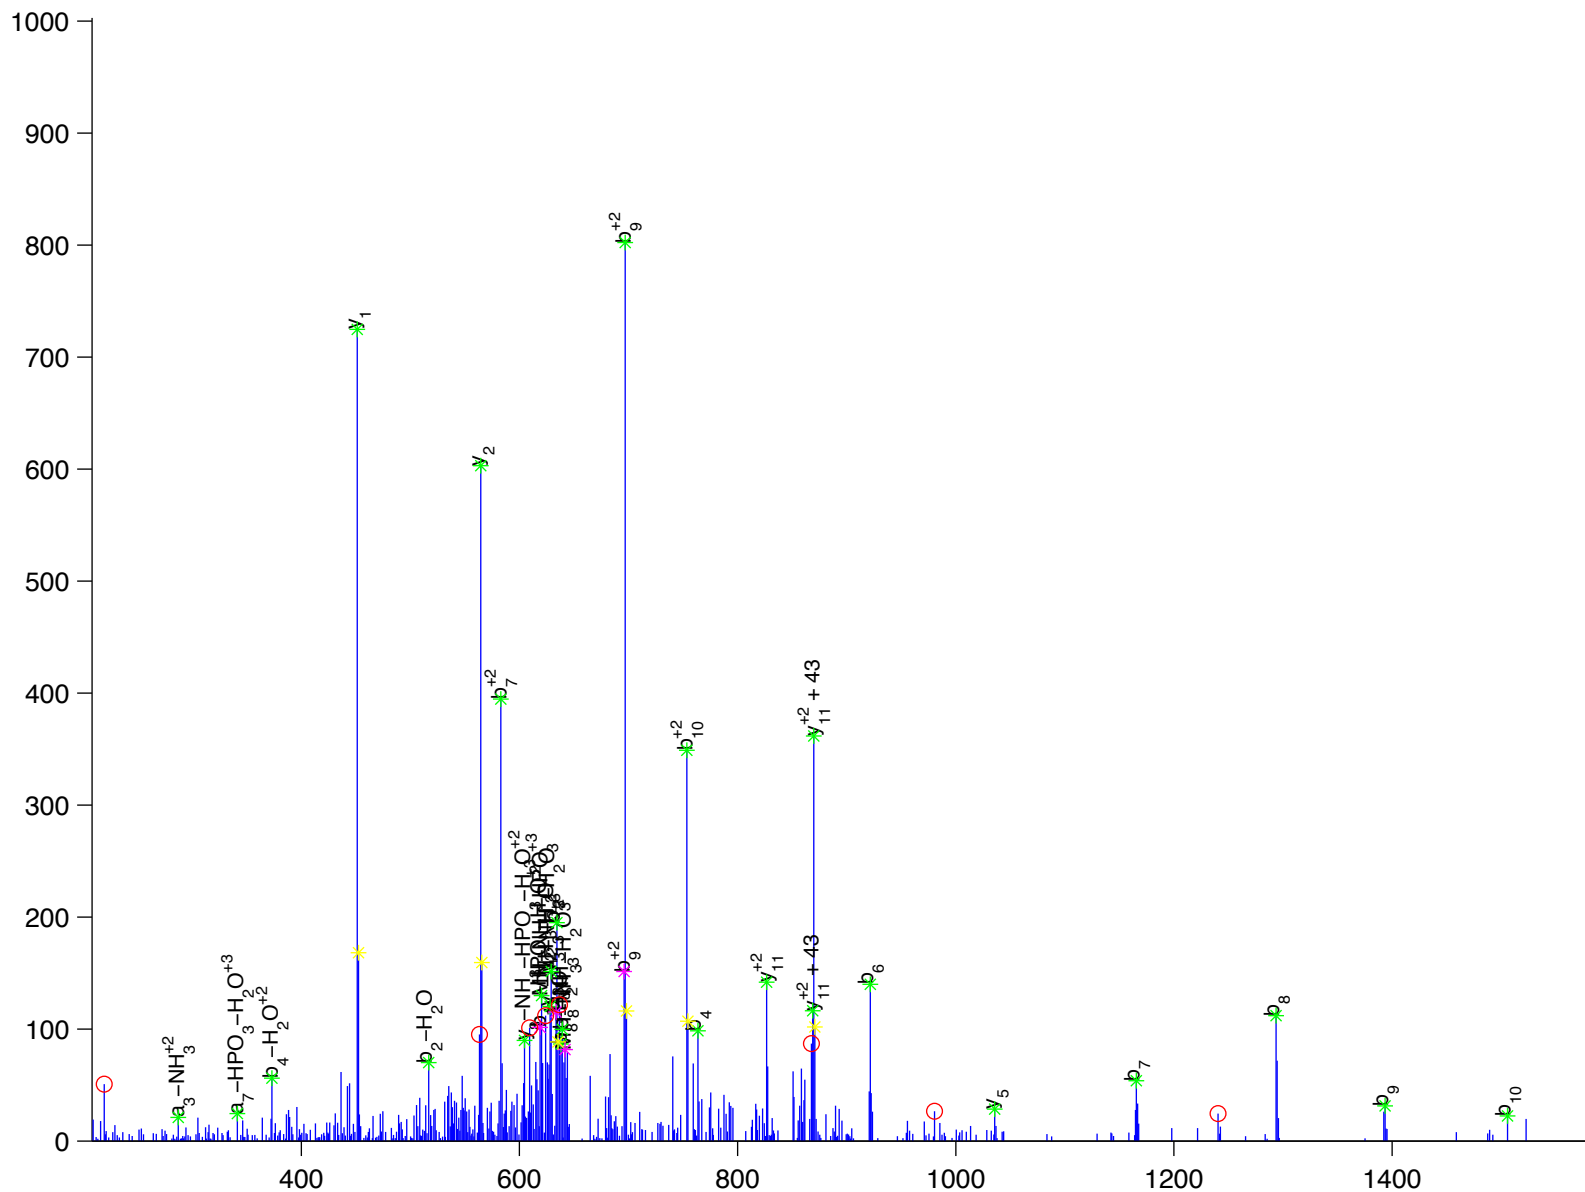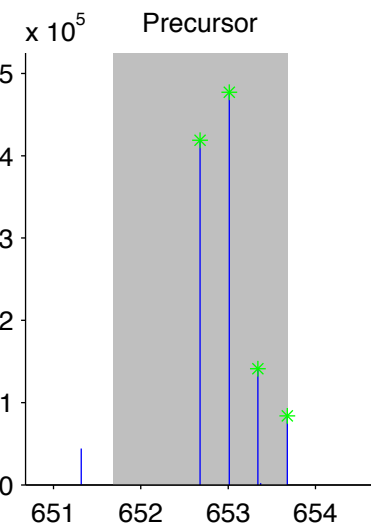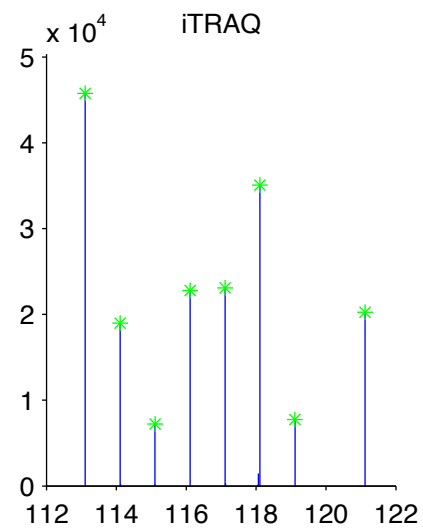

S [ E ] N [ E ] D [ I ] y [ Y ] K

Iatrophilin 2 precursor [Homo sapiens]

Charge State: +3

Scan Number: 4820

File Name: HJ050711\_GBMxeno\_bio1\_E\_HANNAH.raw

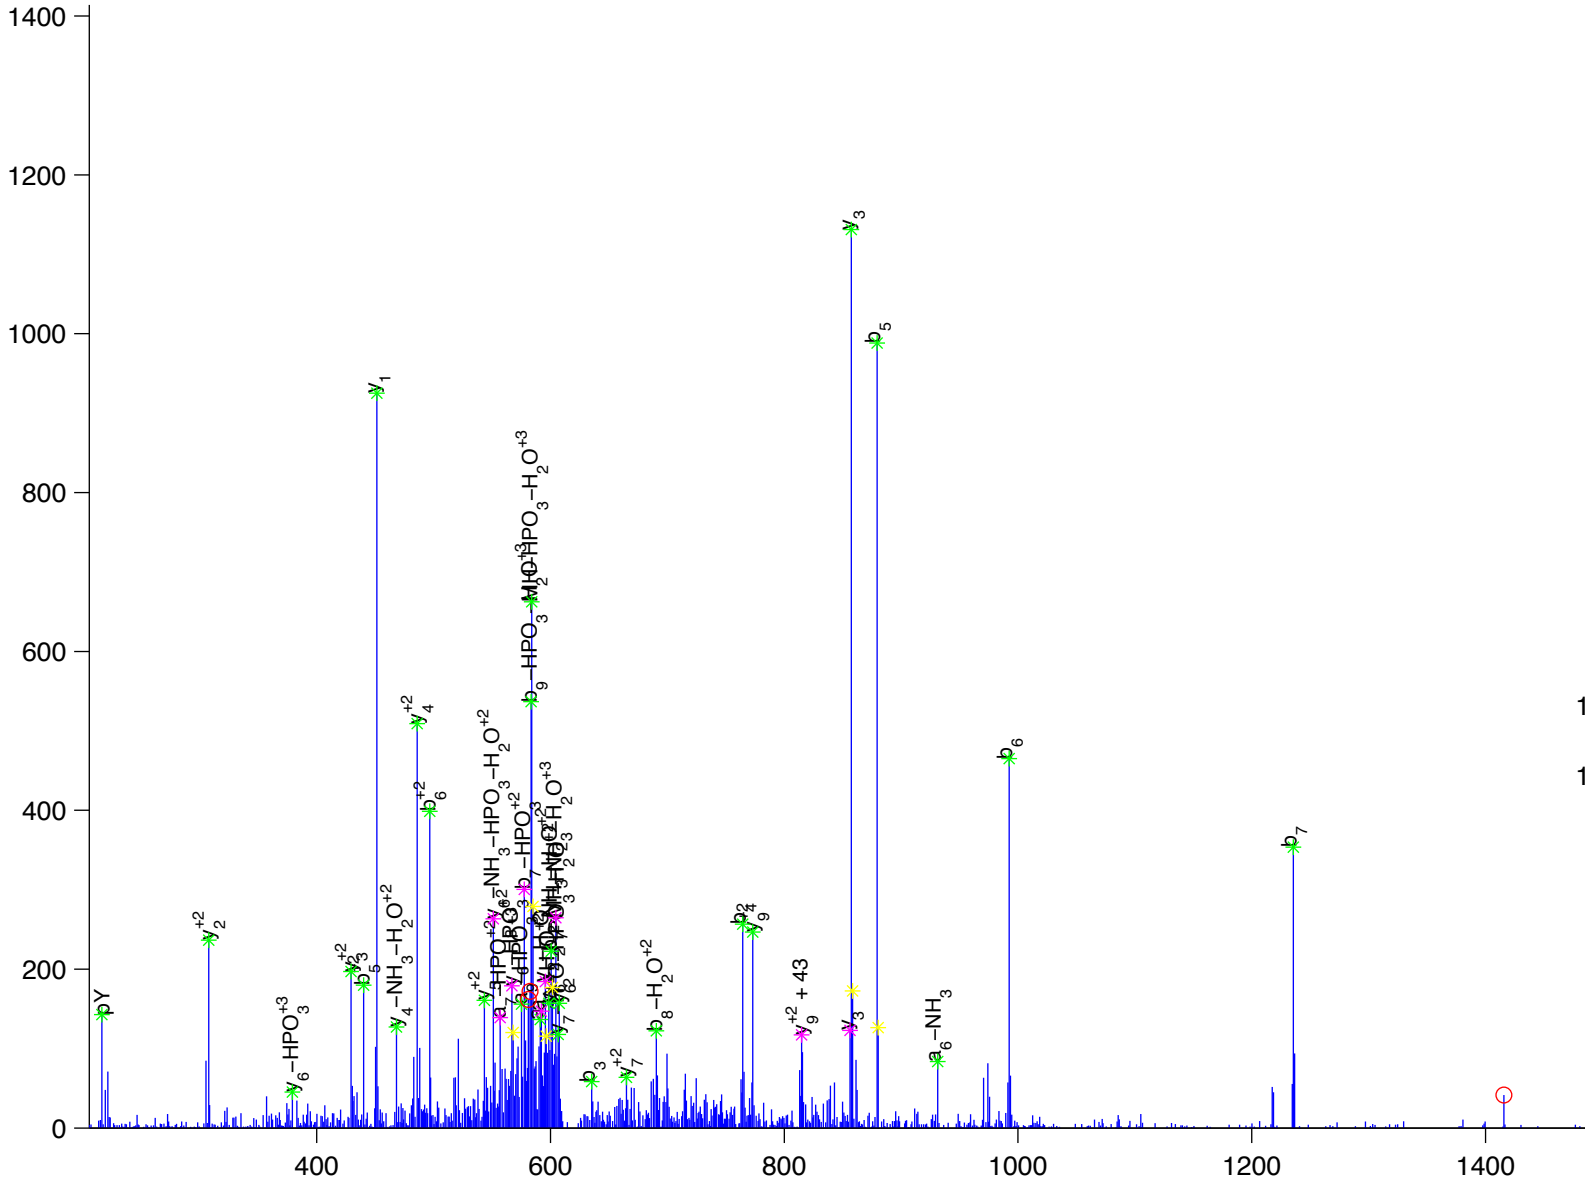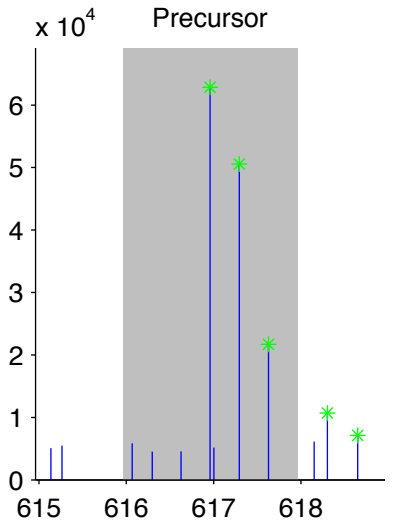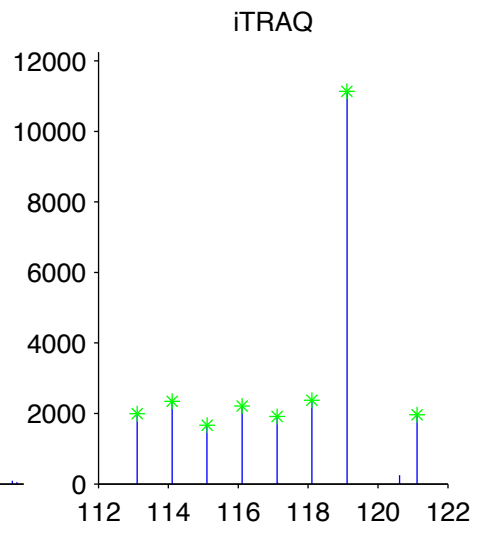

E [P] c [L] H [P] L [E] P [D] E [V] E [y] E [P] R

leucyl/cystinyl aminopeptidase isoform 2 [Homo sapiens]  
 Charge State: +3  
 Scan Number: 6317  
 File Name: HJ050711\_GBMxeno\_bio1\_E\_HANNAH.raw

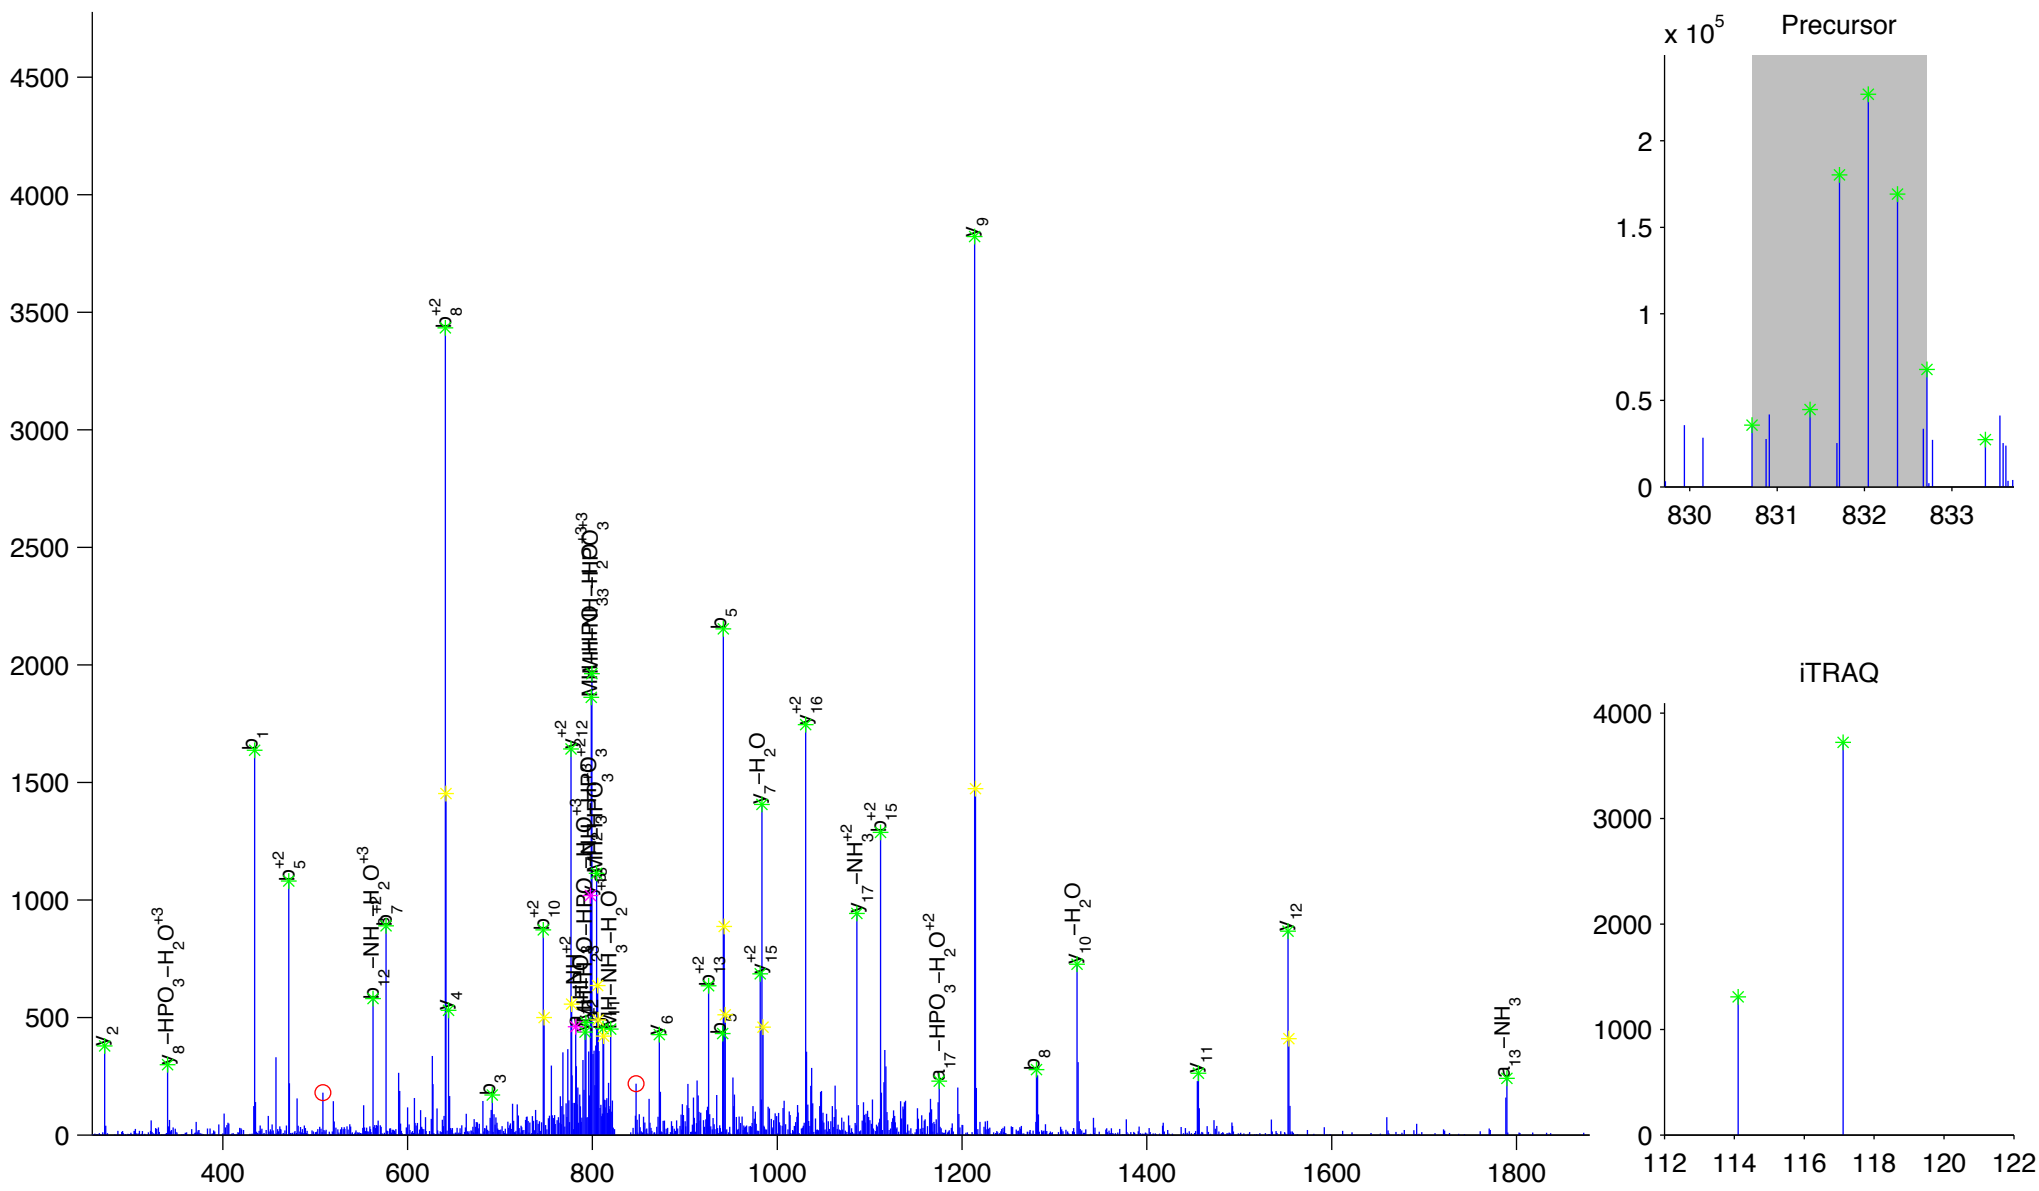

V[A]D[P]D[H]D[H]T[G]F[L]T[E]y[V]A[T]R

mitogen-activated protein kinase 1 [Homo sapiens]

Charge State: +2

Scan Number: 6315

File Name: HJ050711\_GBMxeno\_bio1\_E\_HANNAH.raw

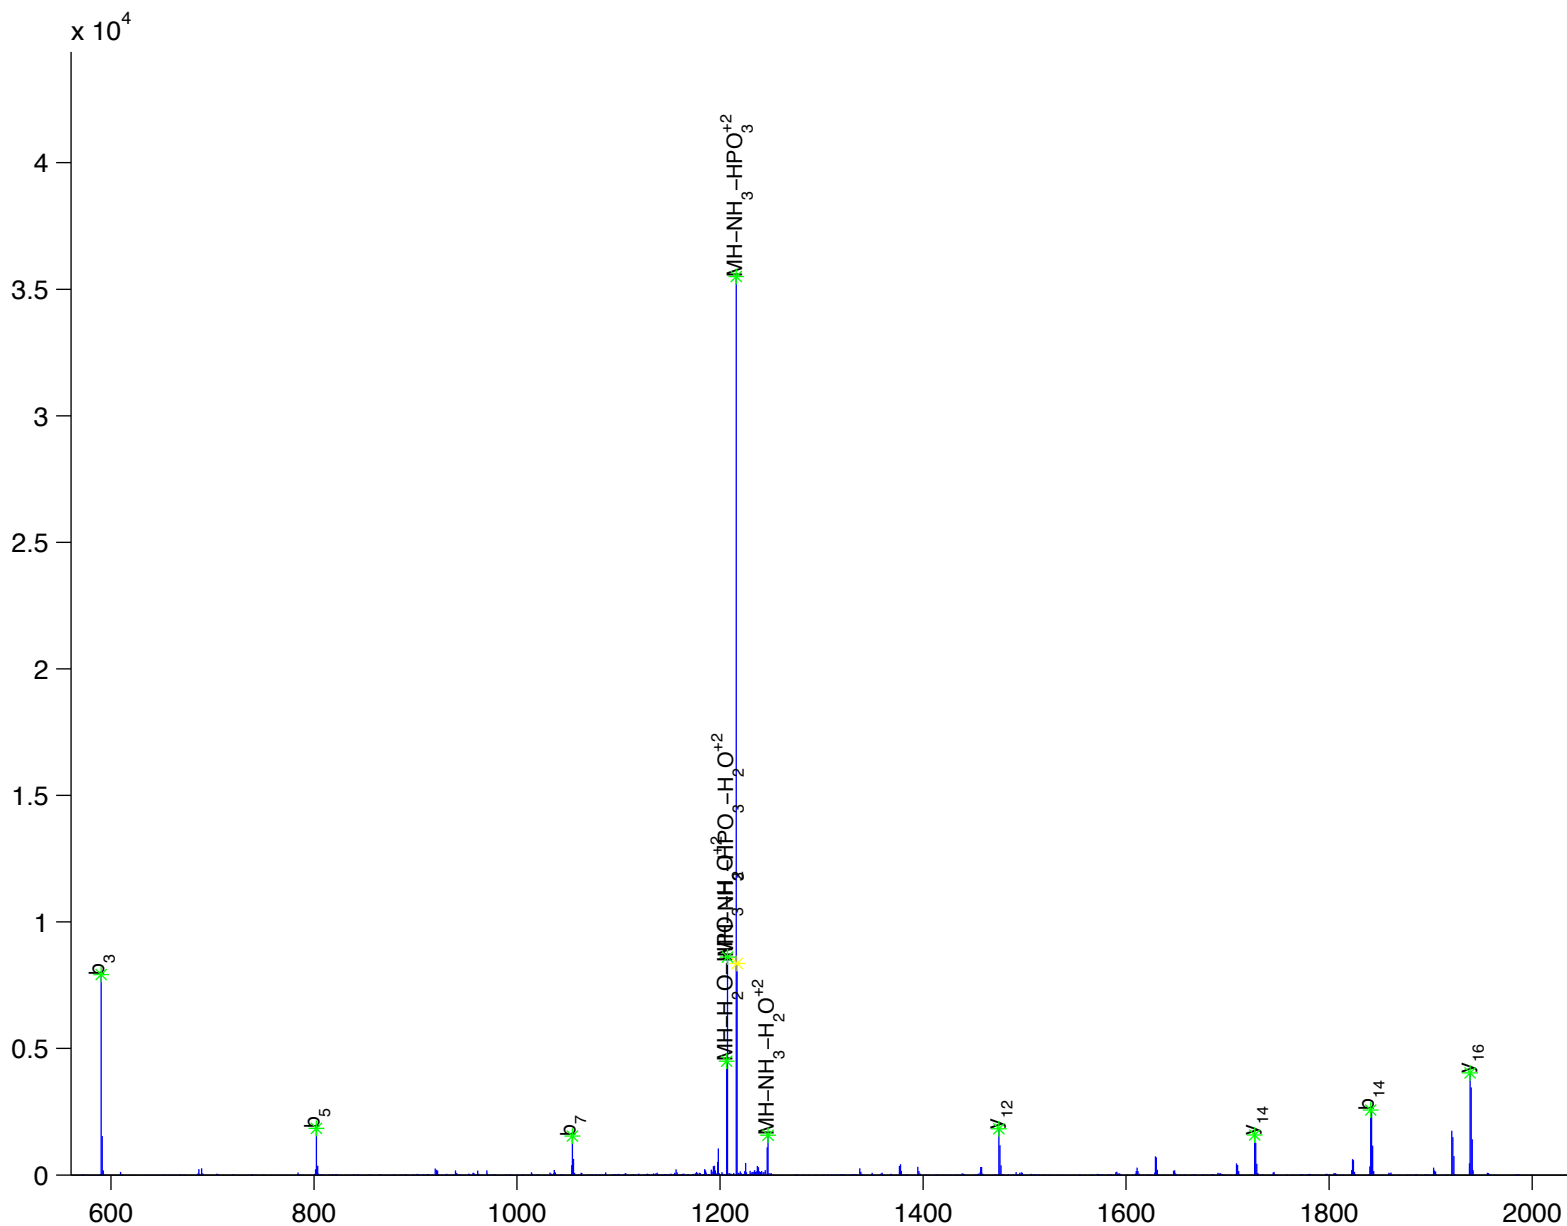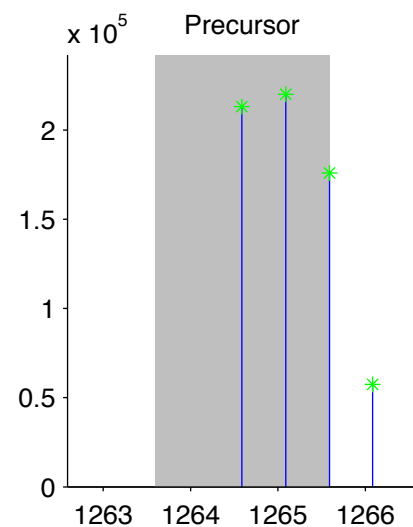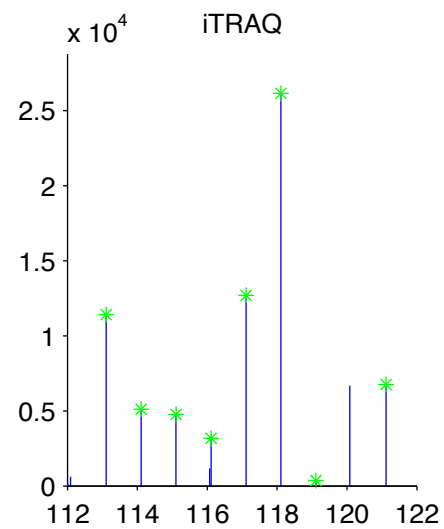

V[A][D][P][D][H][D][H][T][G][F][L][T][E]y[V][A][T]R

mitogen-activated protein kinase 1 [Homo sapiens]

Charge State: +4

Scan Number: 6387

File Name: HJ050711\_GBMxeno\_bio1\_E\_HANNAH.raw

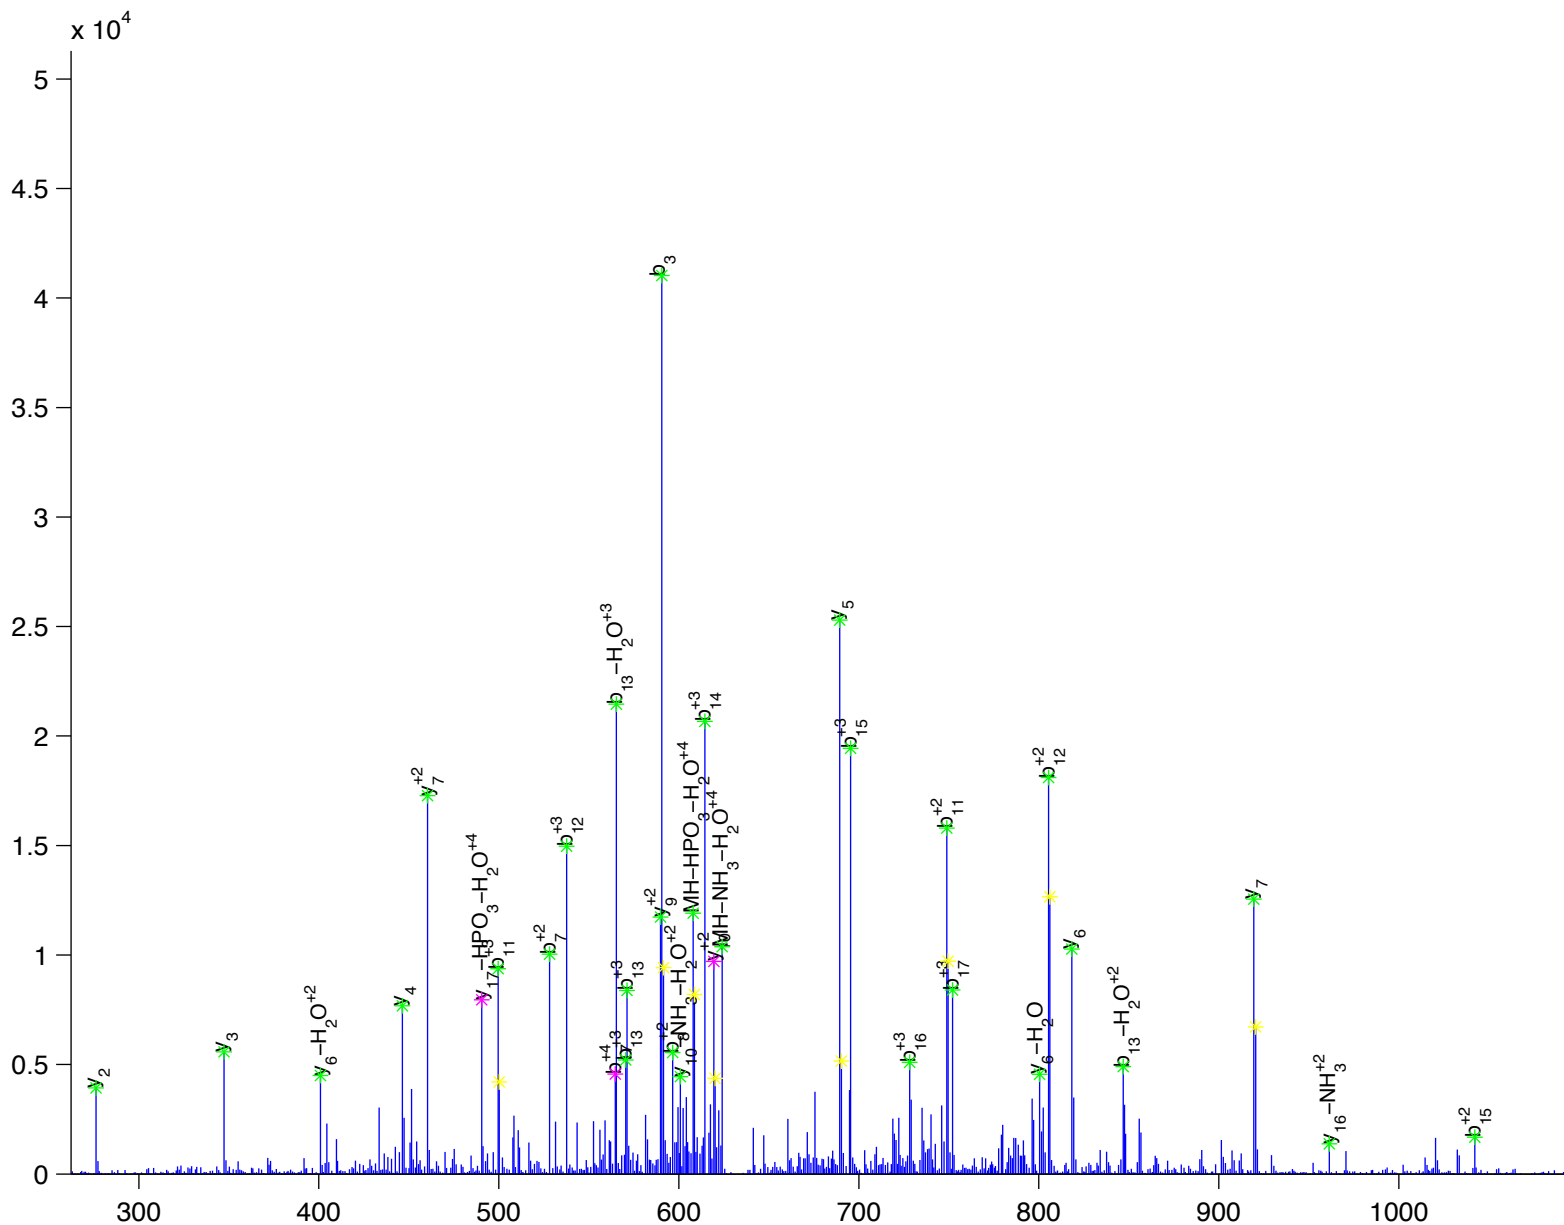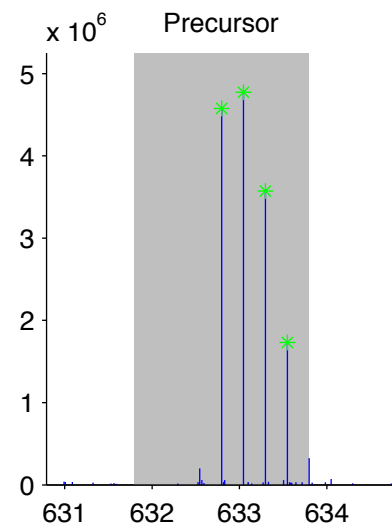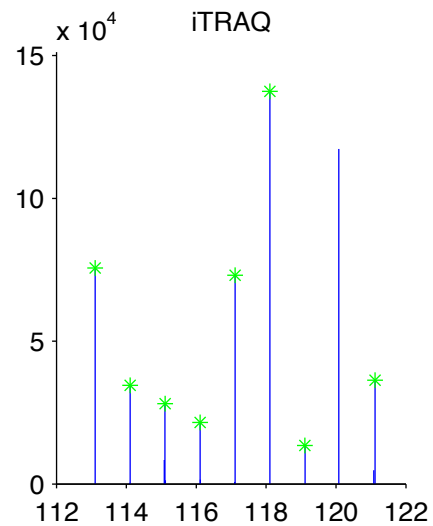



V[A]D[P]D[H]D[H]T[G]F[L]T[E]y[V]A[T]R

mitogen-activated protein kinase 1 [Homo sapiens]

Charge State: +3

Scan Number: 6473

File Name: HJ050711\_GBMxeno\_bio1\_E\_HANNAH.raw

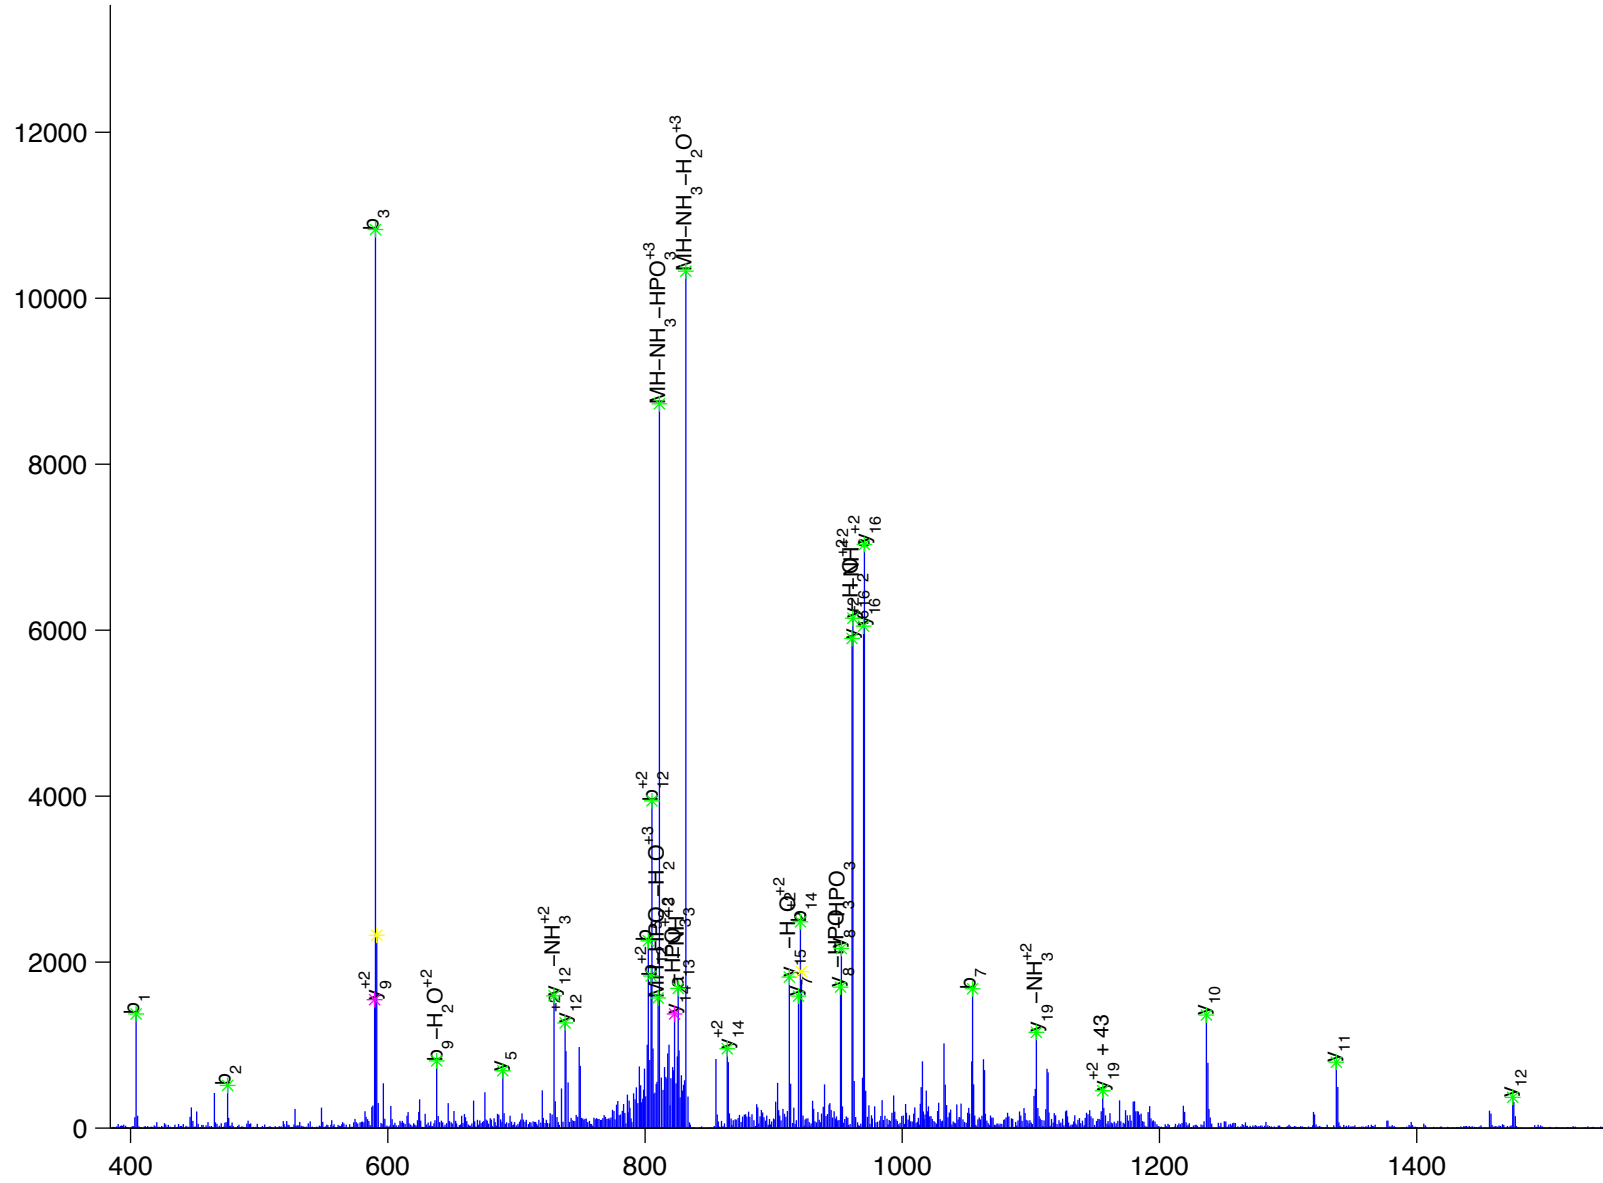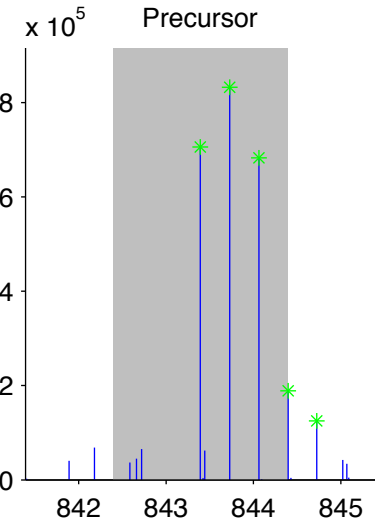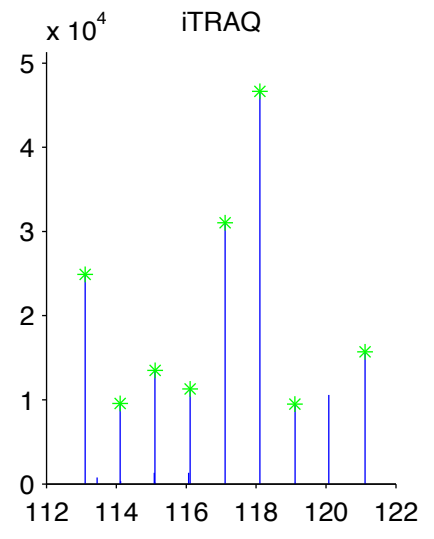

Q[A]D[E]E[m]T[G]y[V]A[T]R

mitogen-activated protein kinase 11 [Homo sapiens]

Charge State: +3

Scan Number: 3073

File Name: HJ050711\_GBMxeno\_bio1\_E\_HANNAH.raw

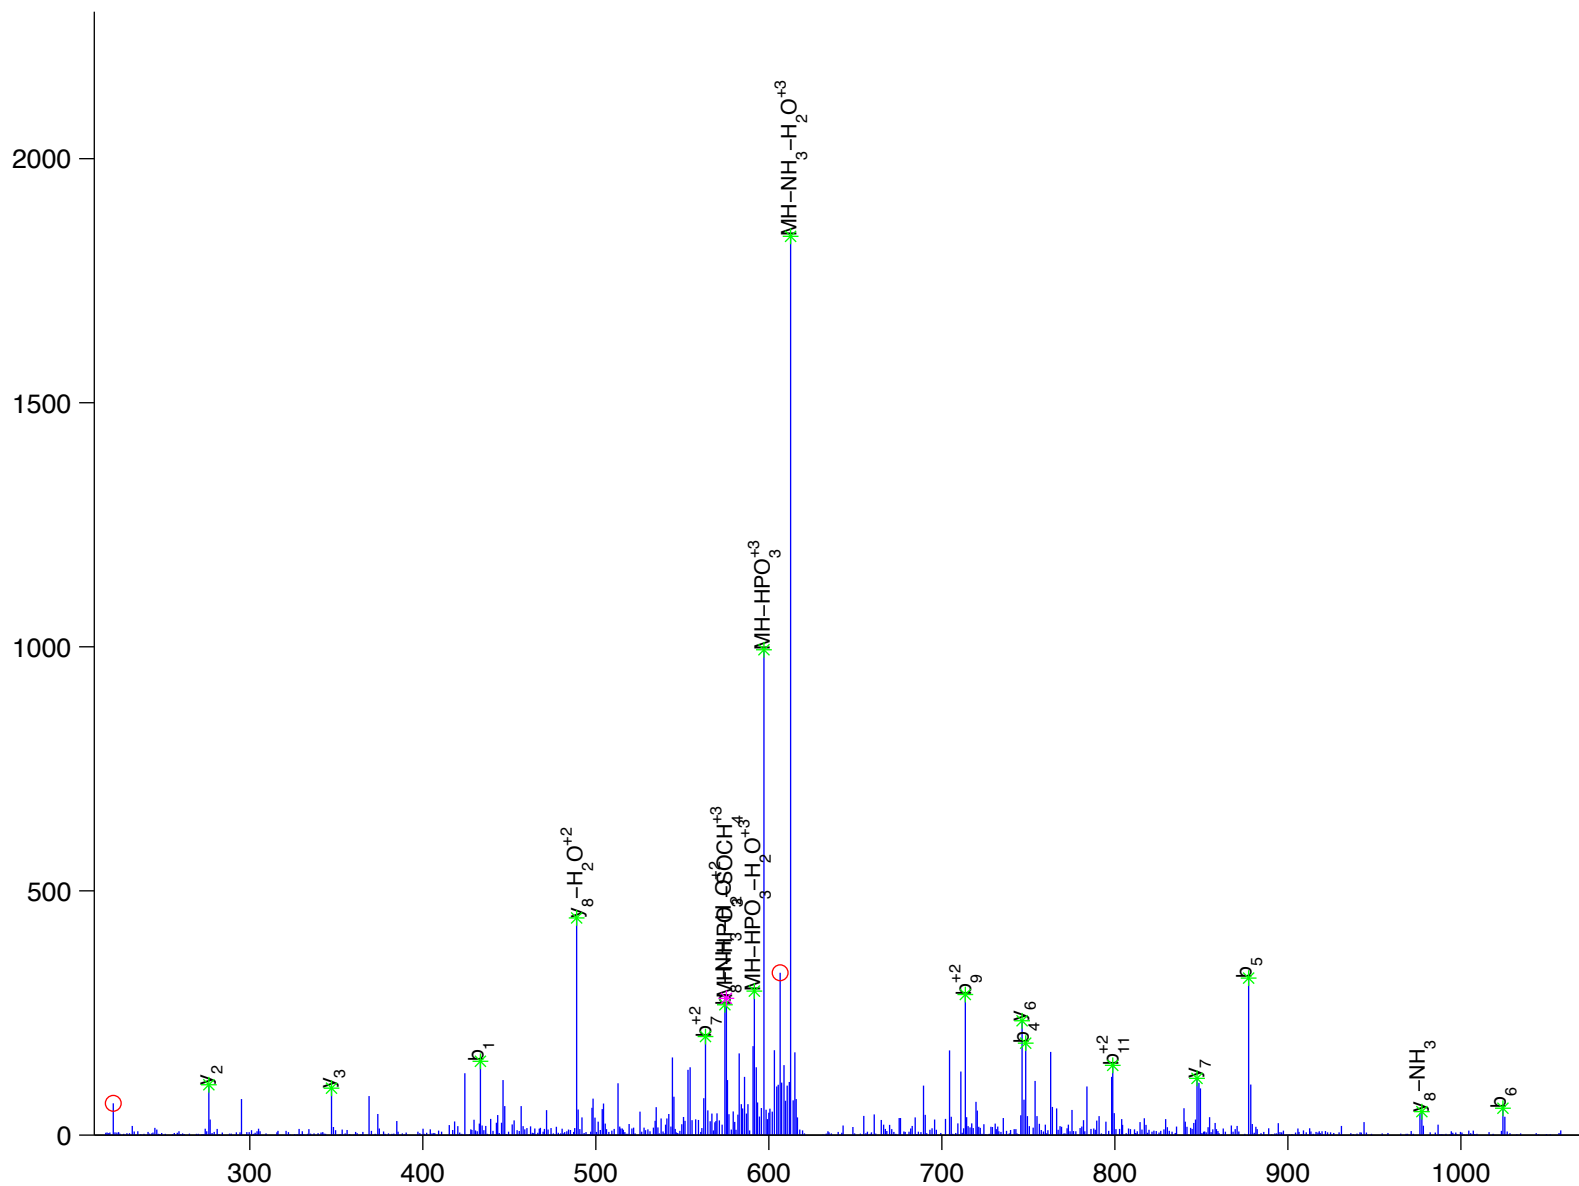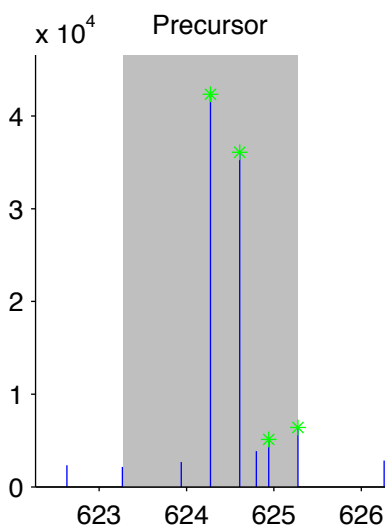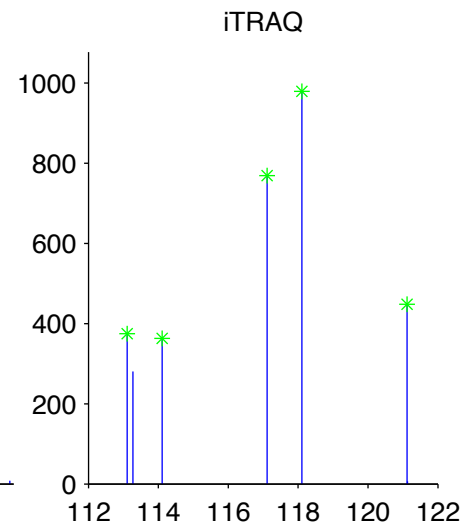

Q [ A ] [ D ] [ E ] [ E ] [ m ] [ T ] [ G ] [ y ] [ V ] [ A ] [ T ] [ R ]

mitogen-activated protein kinase 11 [Homo sapiens]

Charge State: +2

Scan Number: 3075

File Name: HJ050711\_GBMxeno\_bio1\_E\_HANNAH.raw

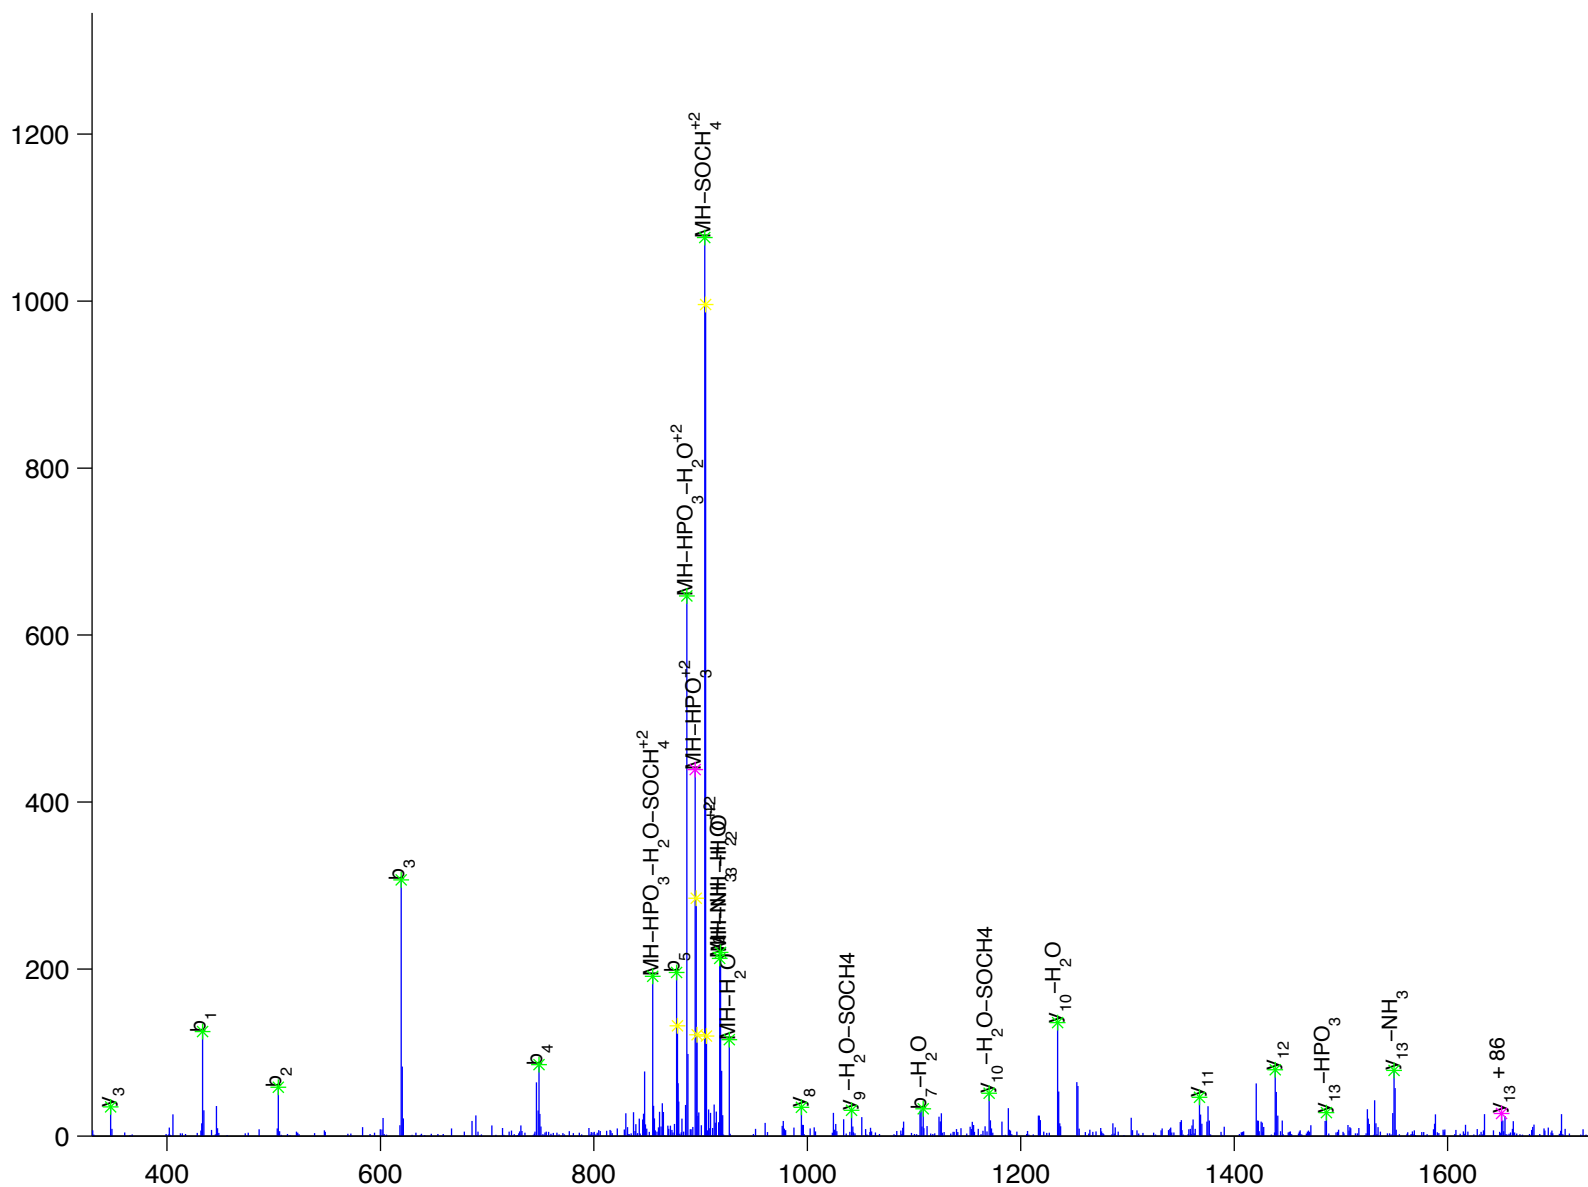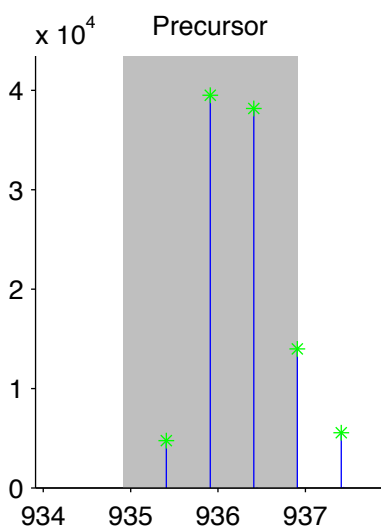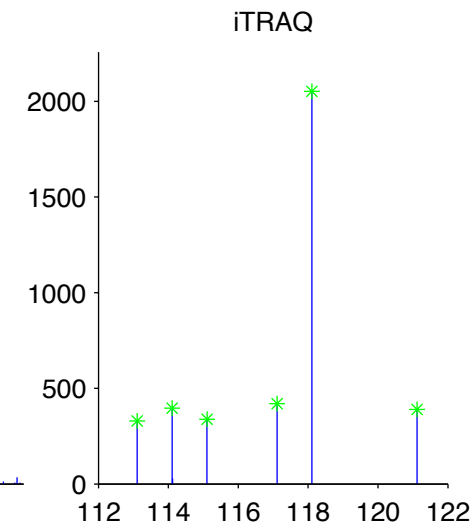

Q[A][D][E][E][M][T][G]y[V][A][T]R

mitogen-activated protein kinase 11 [Homo sapiens]

Charge State: +2

Scan Number: 4858

File Name: HJ050711\_GBMxeno\_bio1\_E\_HANNAH.raw

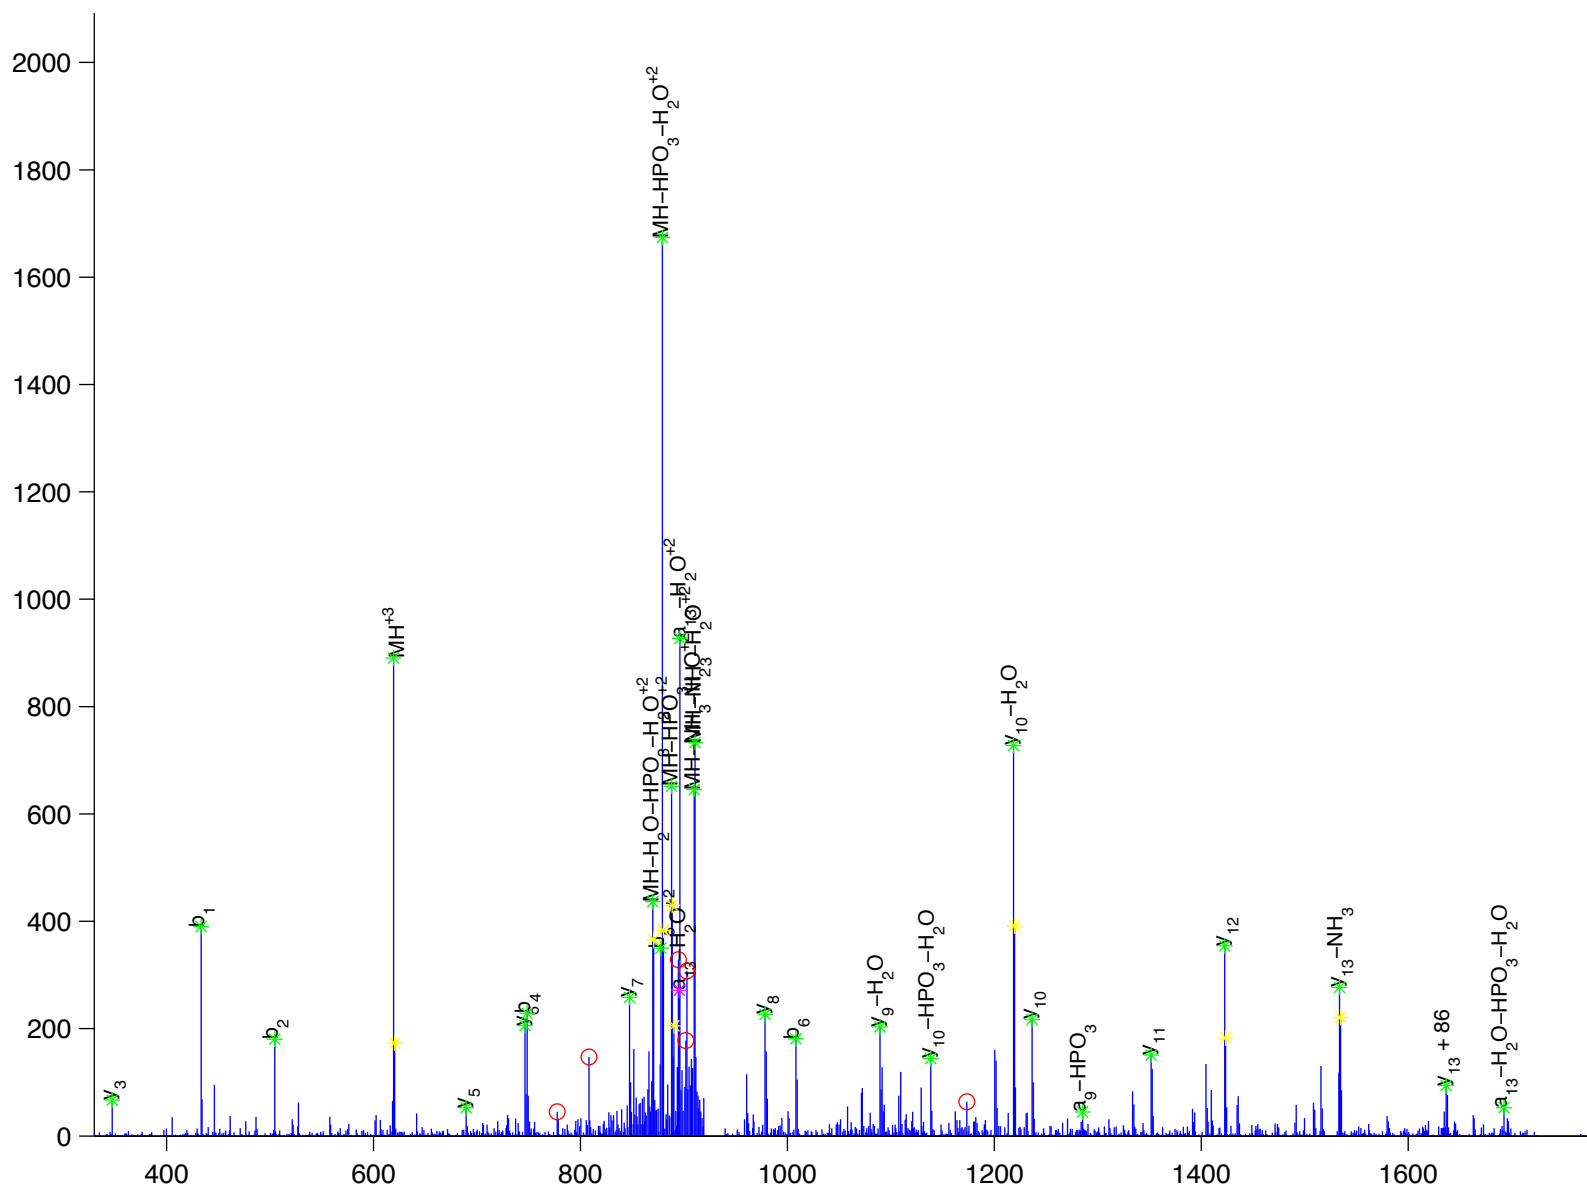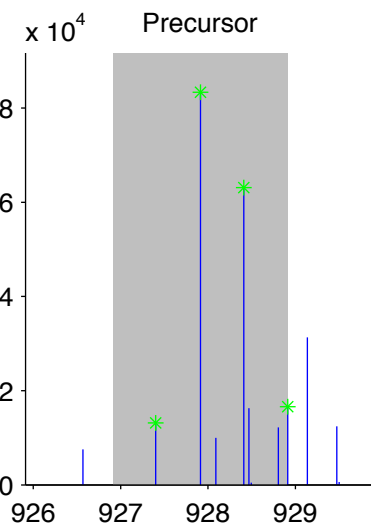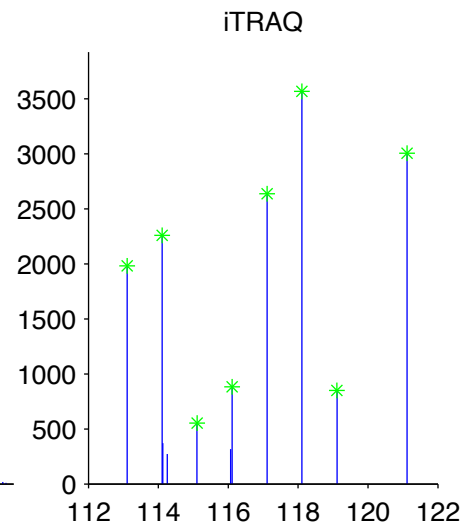

Q [ A ] D [ S ] E [ m ] T [ G ] y [ V ] V [ T ] R

mitogen-activated protein kinase 12 [Homo sapiens]

Charge State: +2

Scan Number: 3556

File Name: HJ050711\_GBMxeno\_bio1\_E\_HANNAH.raw

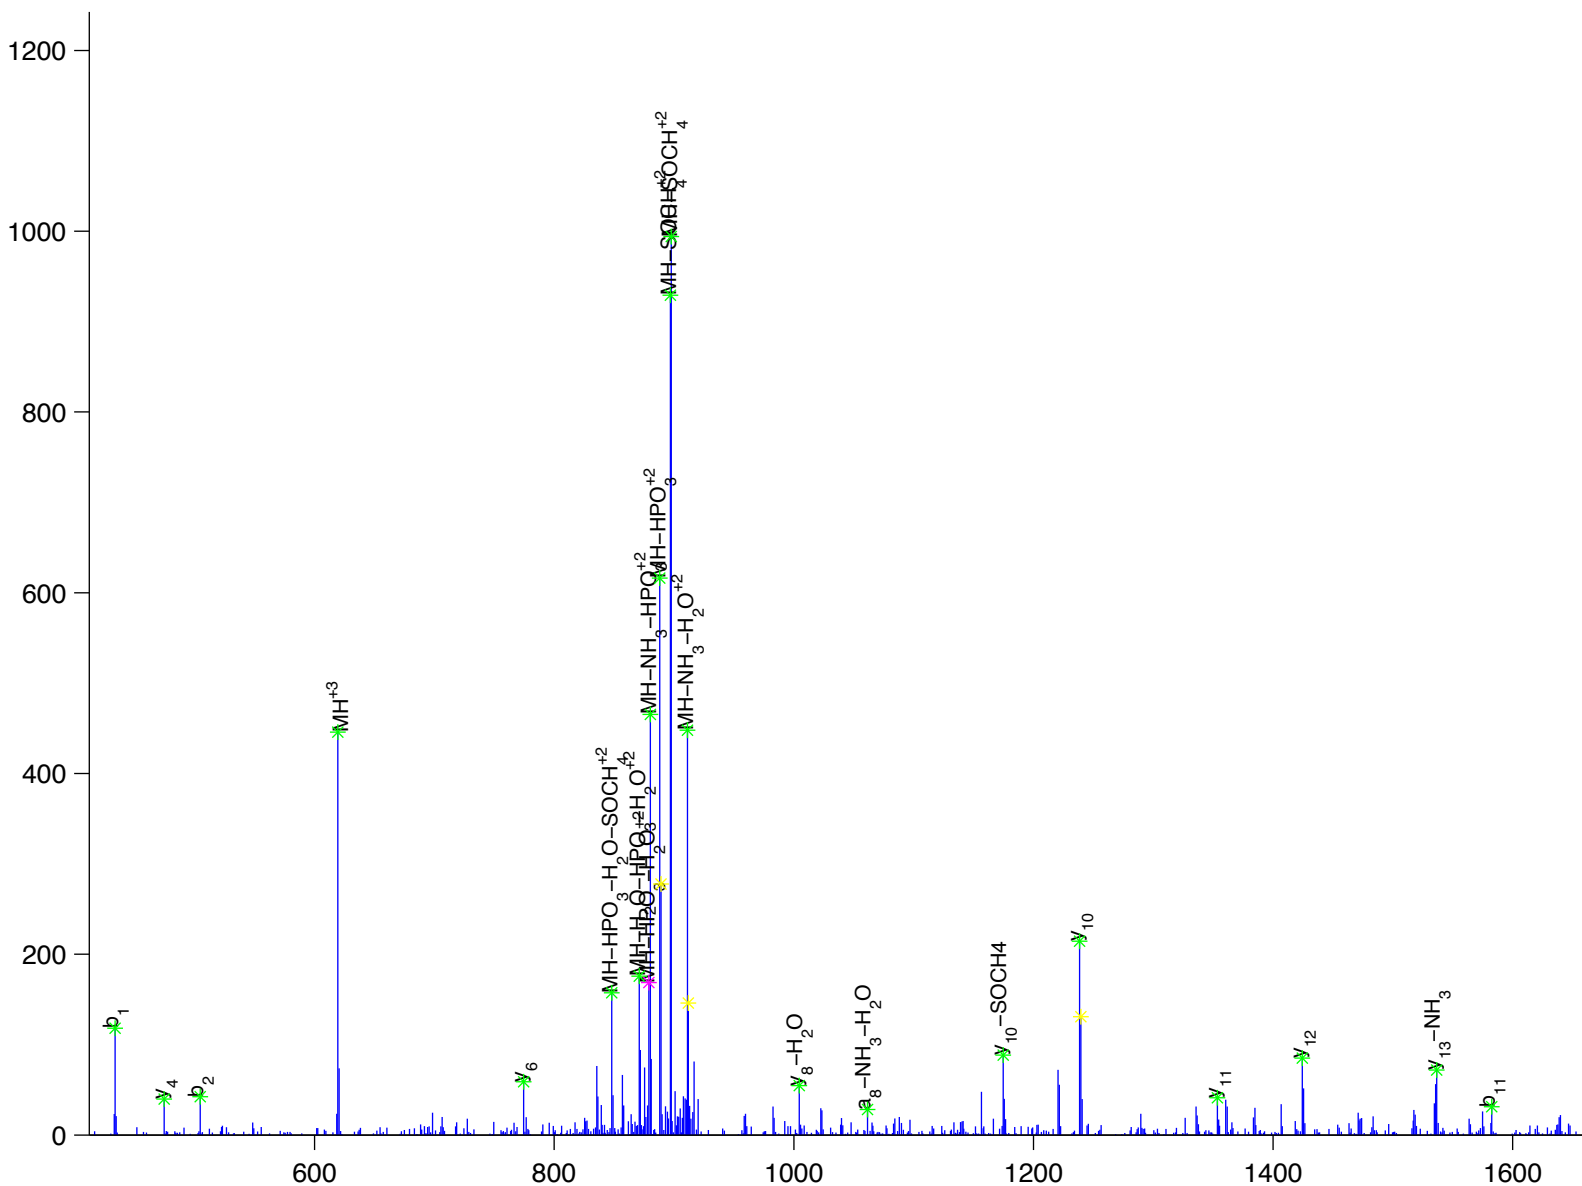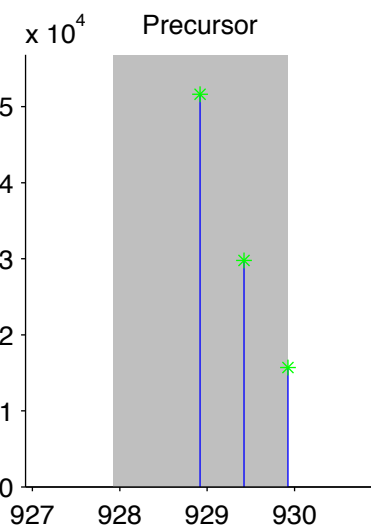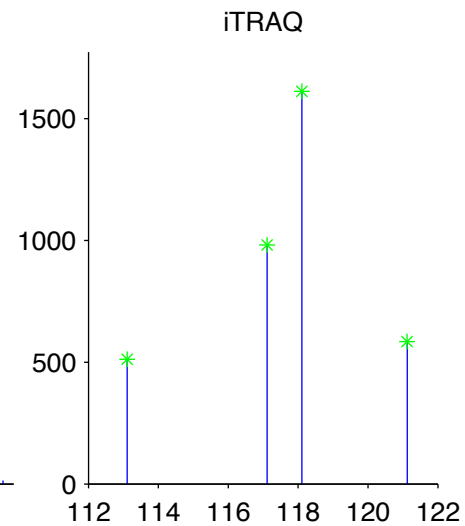

Q[A][D][S][E][M][T][G]y[V][V][T]R

mitogen-activated protein kinase 12 [Homo sapiens]

Charge State: +3

Scan Number: 5299

File Name: HJ050711\_GBMxeno\_bio1\_E\_HANNAH.raw

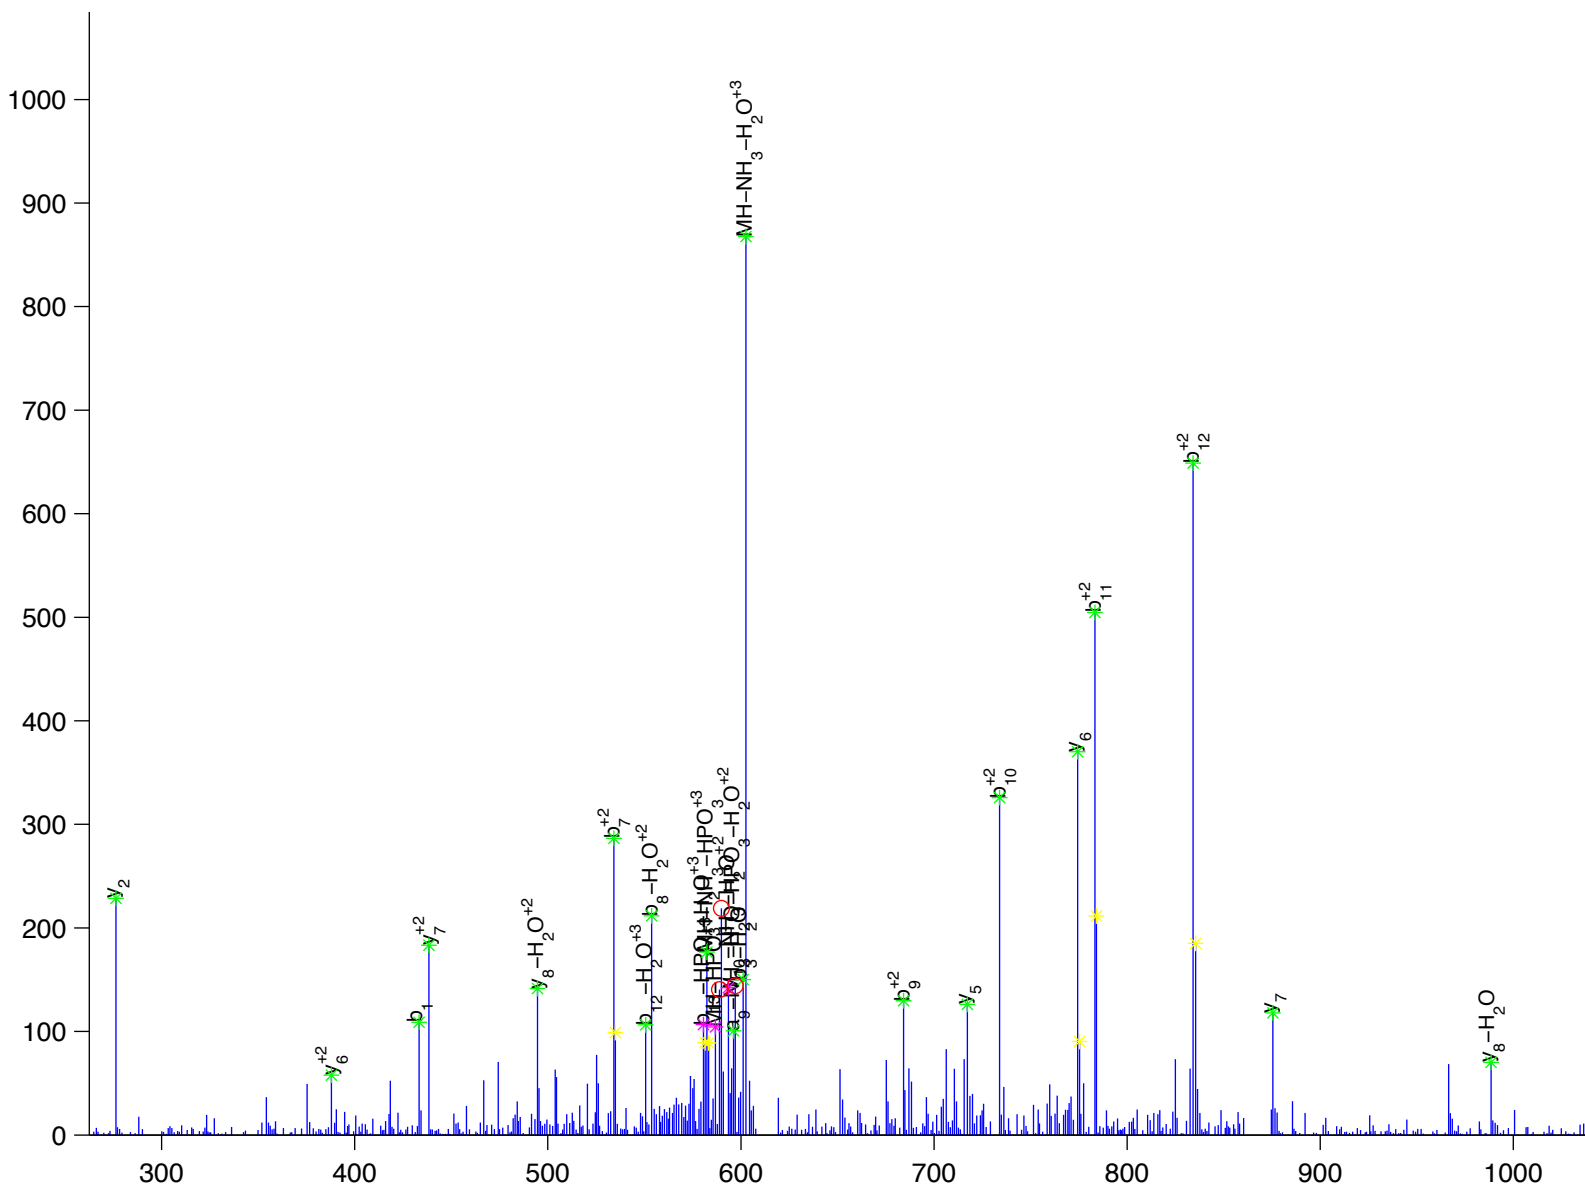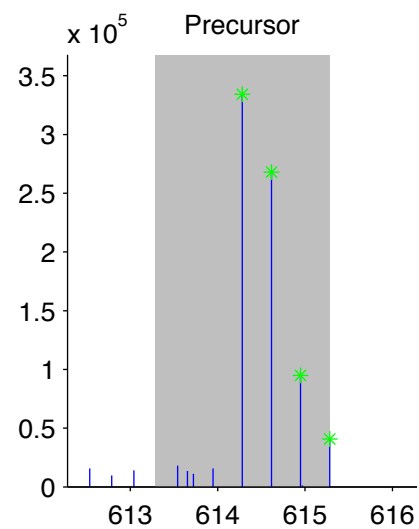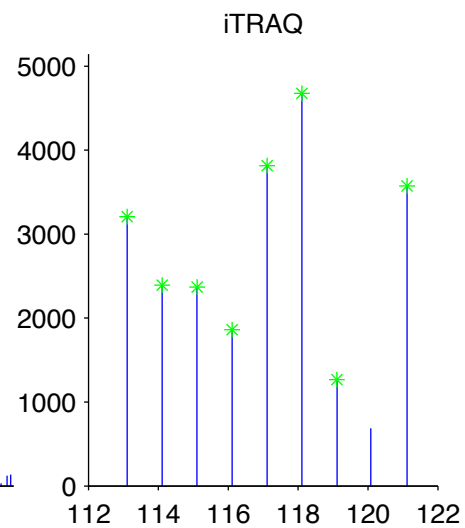

Q [ A ] [ D ] [ S ] [ E ] [ M ] [ T ] [ G ] [ y ] [ V ] [ V ] [ T ] [ R ]

mitogen-activated protein kinase 12 [Homo sapiens]

Charge State: +2

Scan Number: 5301

File Name: HJ050711\_GBMxeno\_bio1\_E\_HANNAH.raw

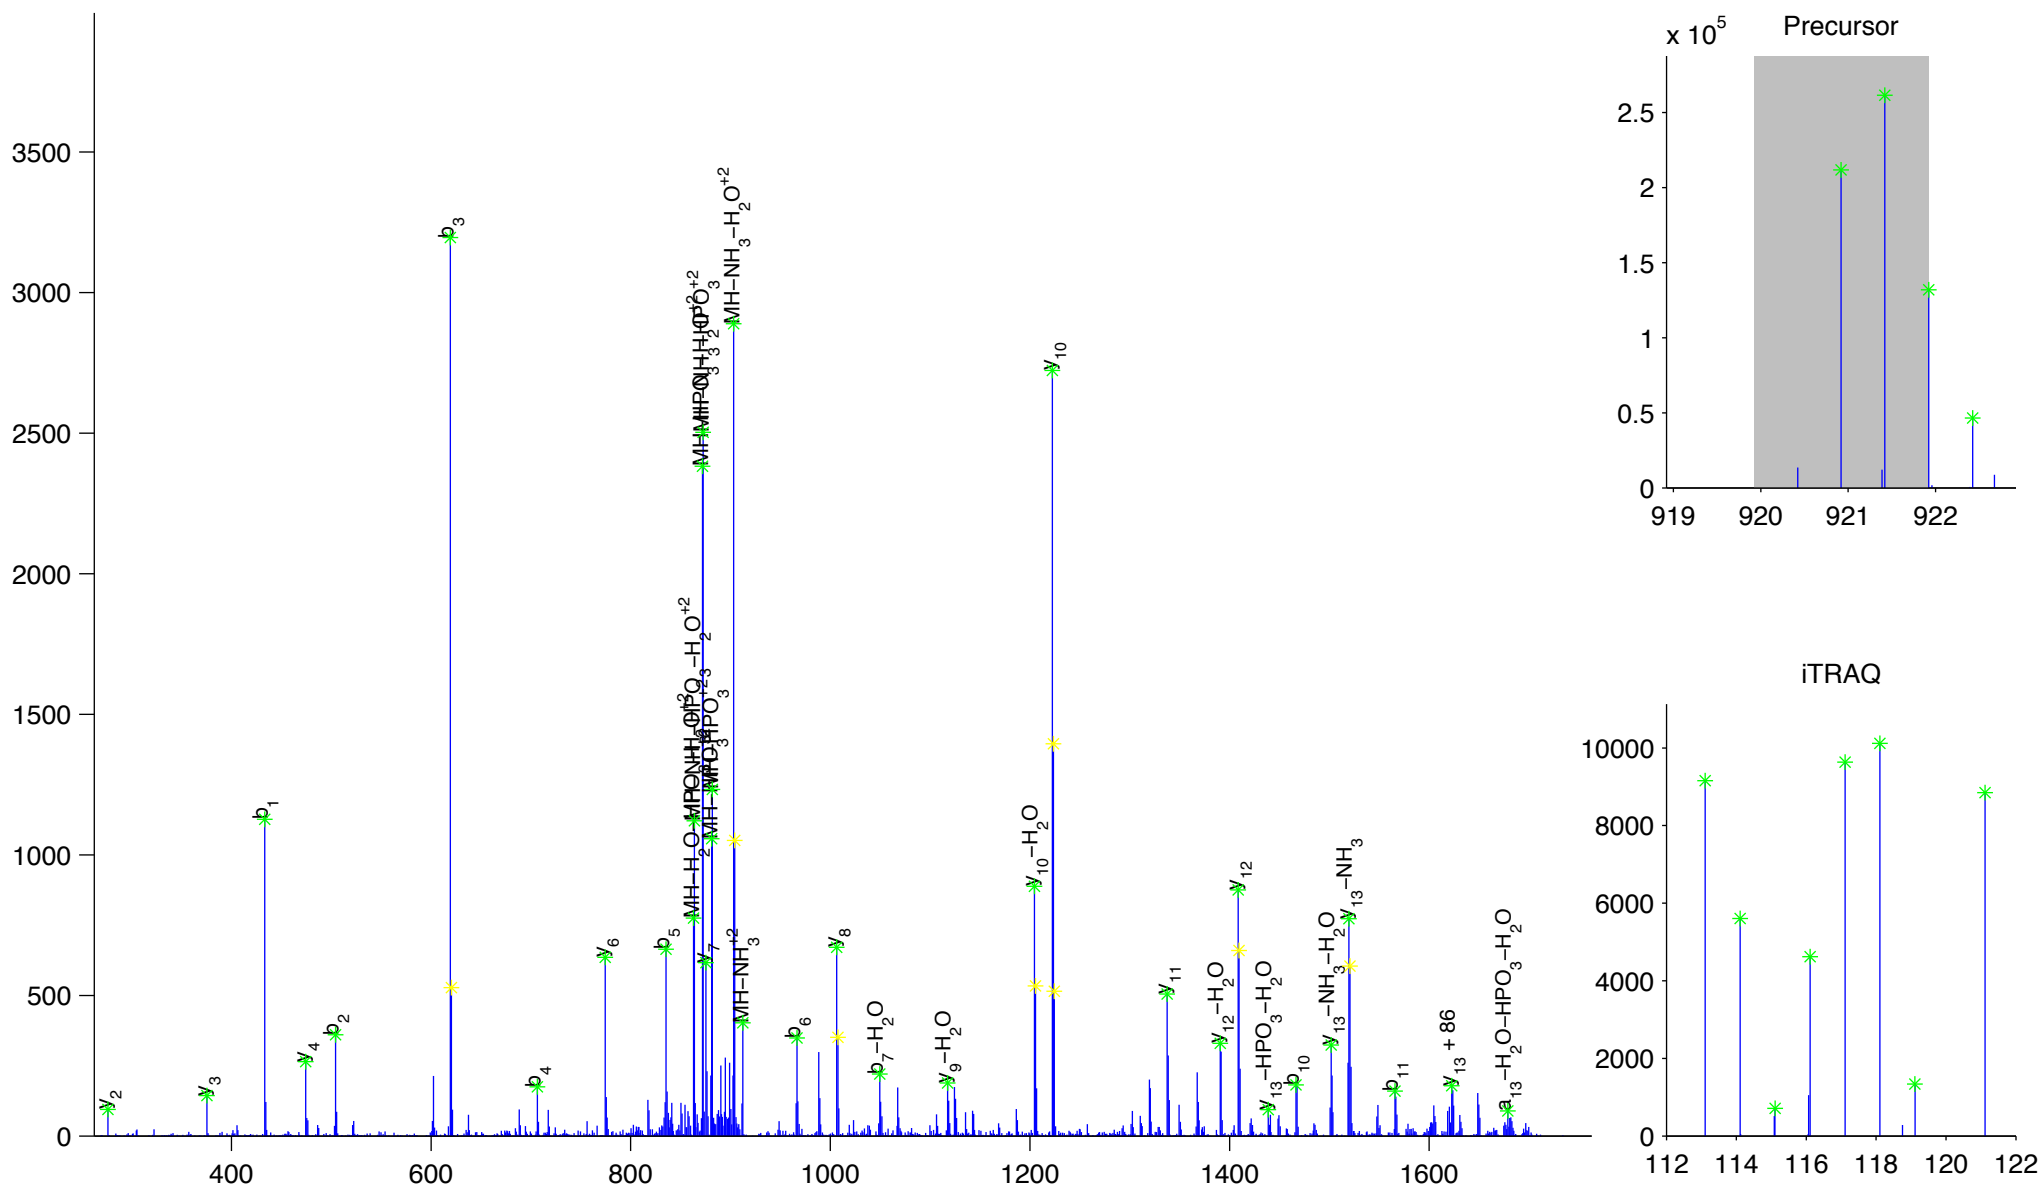

H [ T ] [ D ] [ D ] [ E ] [ m ] [ T ] [ G ] [ y ] [ V ] [ A ] [ T ] [ R ]

mitogen-activated protein kinase 14 isoform 1 [Homo sapiens]

Charge State: +3

Scan Number: 2313

File Name: HJ050711\_GBMxeno\_bio1\_E\_HANNAH.raw

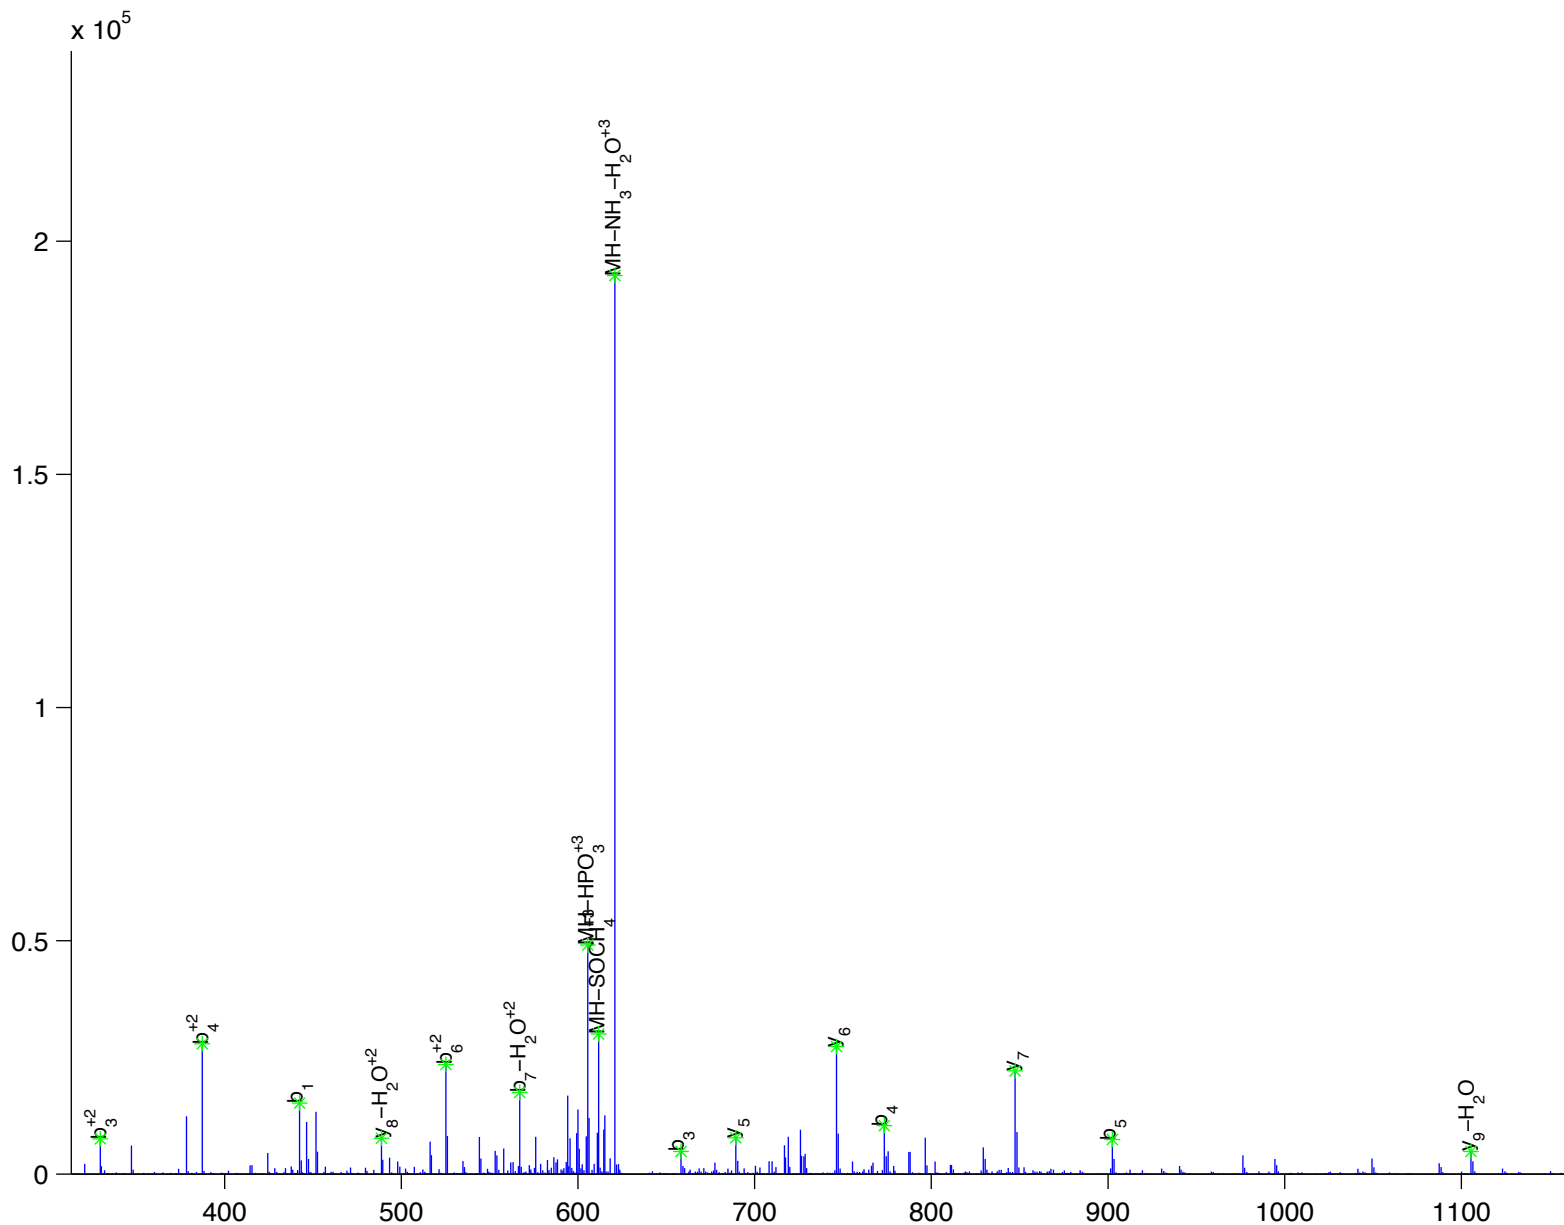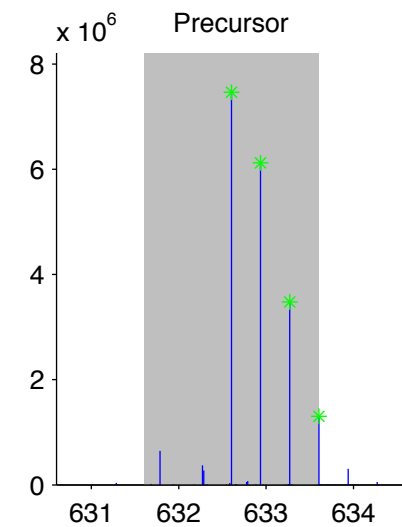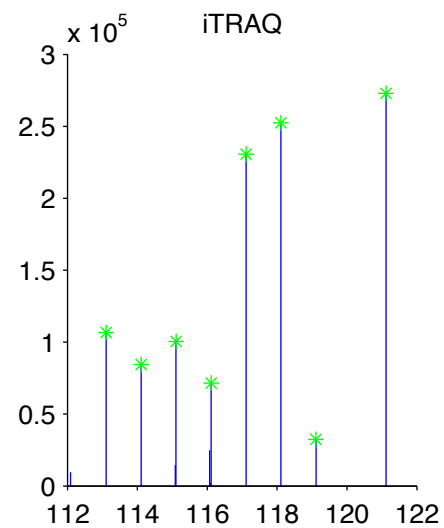



H [ T ] [ D ] [ D ] [ E ] [ m ] [ T ] [ G ] [ y ] [ V ] [ A ] [ T ] [ R ]

mitogen-activated protein kinase 14 isoform 1 [Homo sapiens]

Charge State: +2

Scan Number: 2315

File Name: HJ050711\_GBMxeno\_bio1\_E\_HANNAH.raw

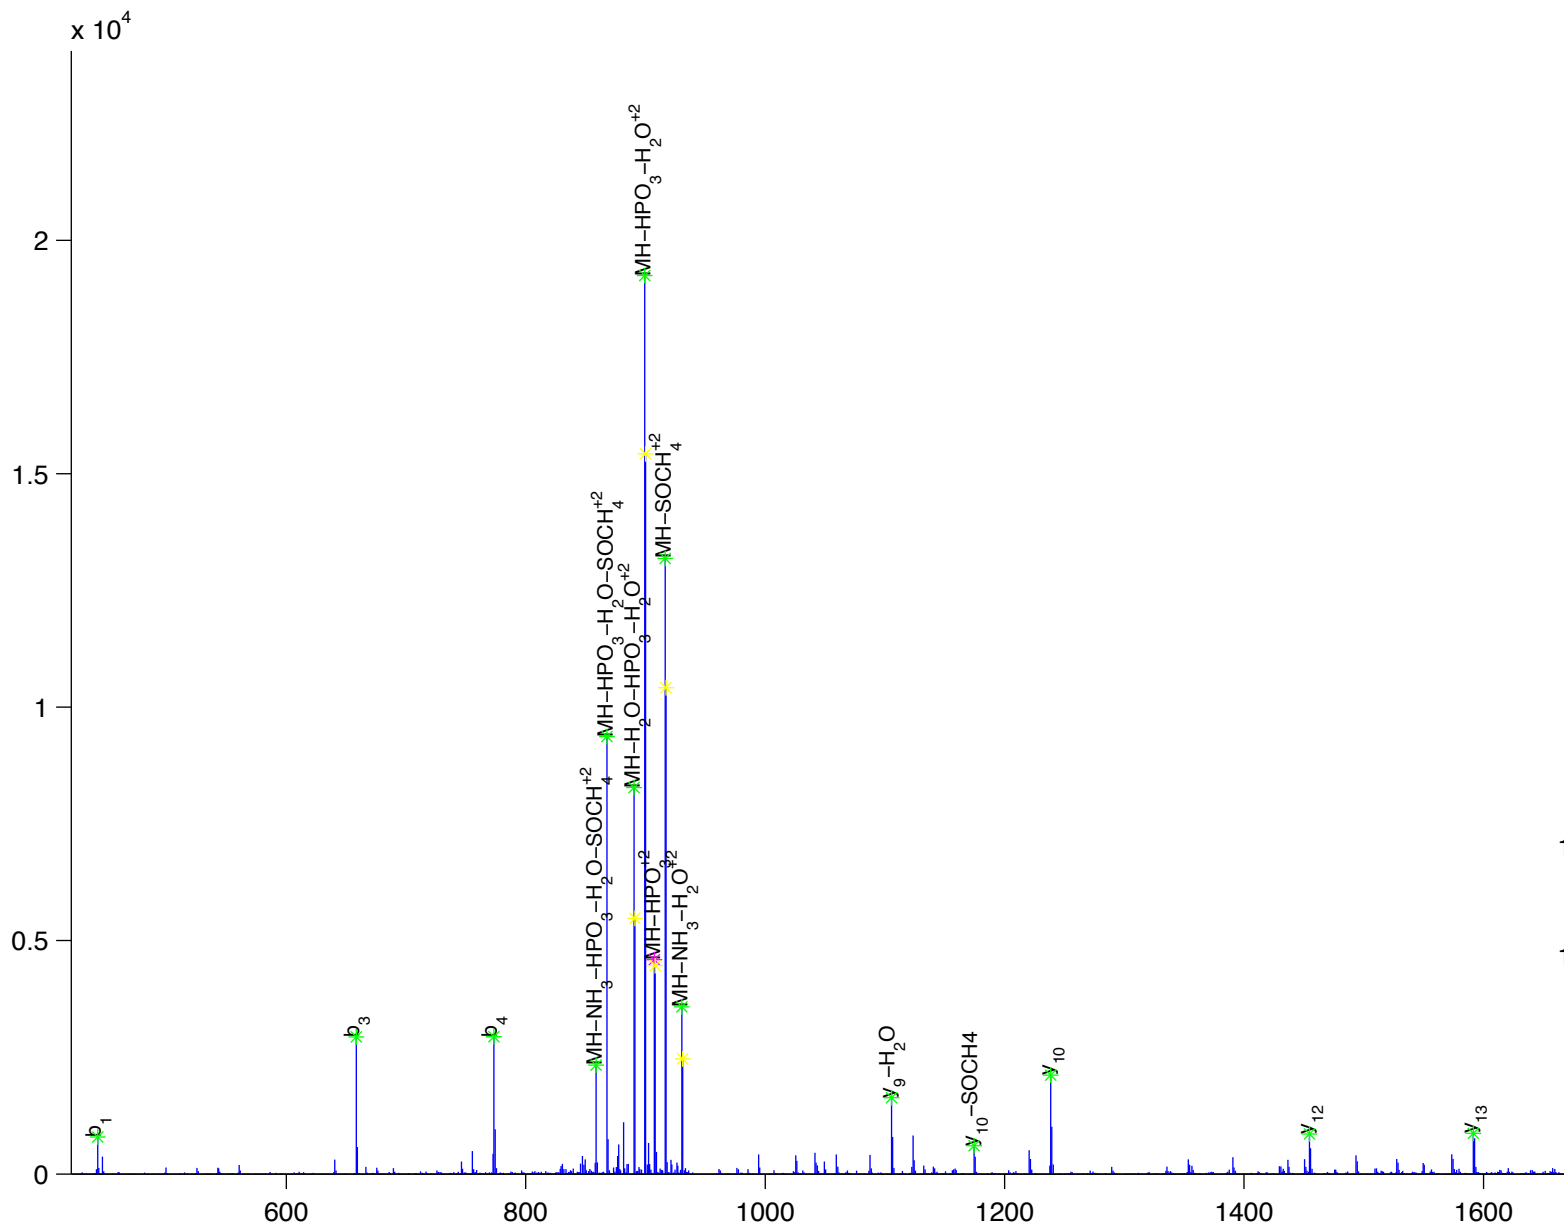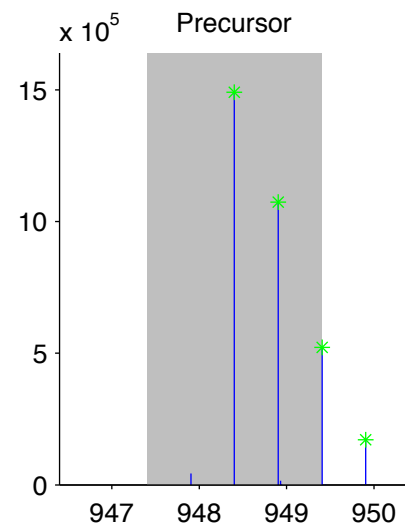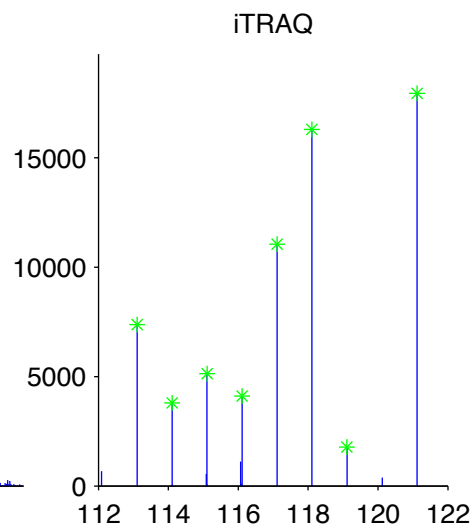

H [ T ] [ D ] [ D ] [ E ] [ m ] [ T ] [ G ] [ y ] [ V ] [ A ] [ T ] [ R ]

mitogen-activated protein kinase 14 isoform 1 [Homo sapiens]

Charge State: +2

Scan Number: 2319

File Name: HJ050711\_GBMxeno\_bio1\_E\_HANNAH.raw

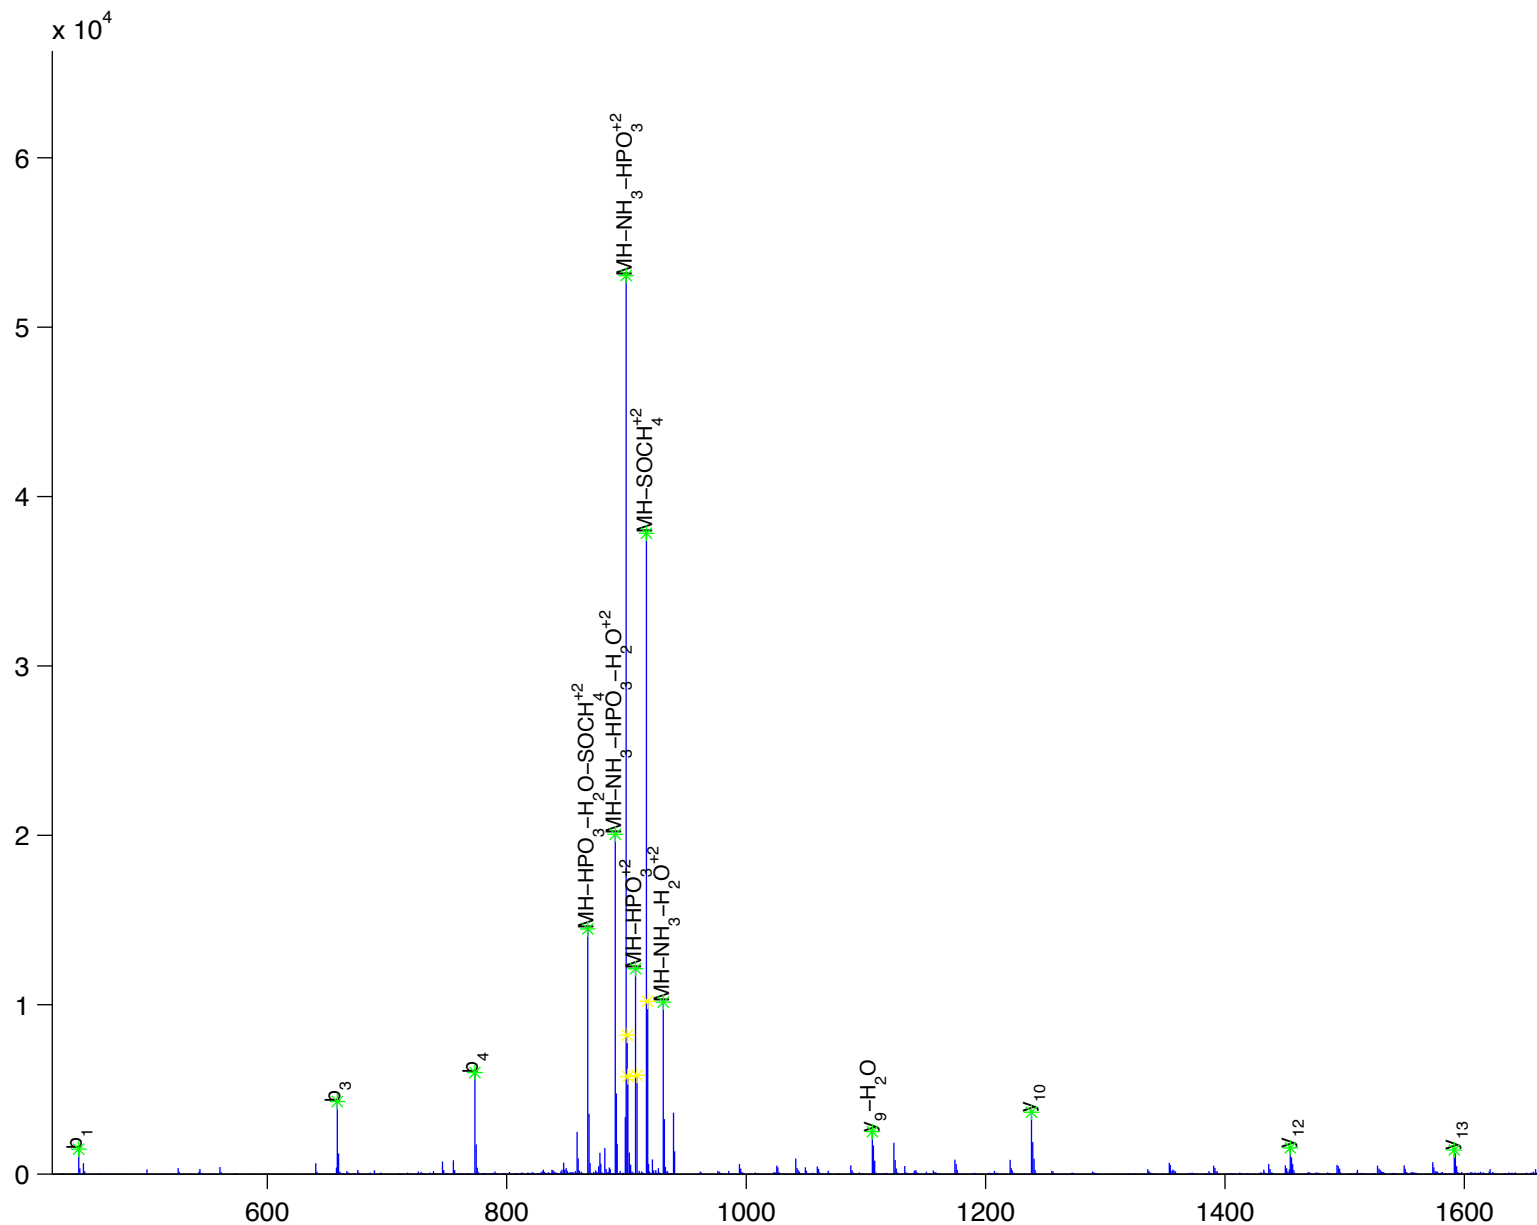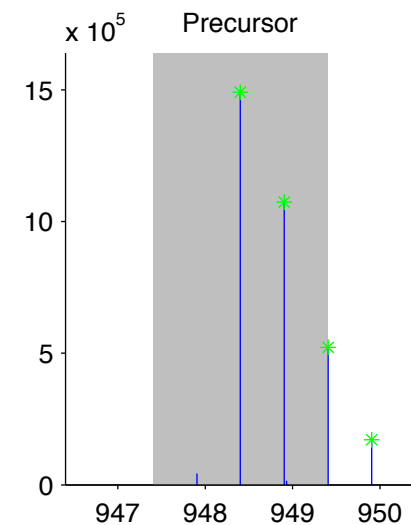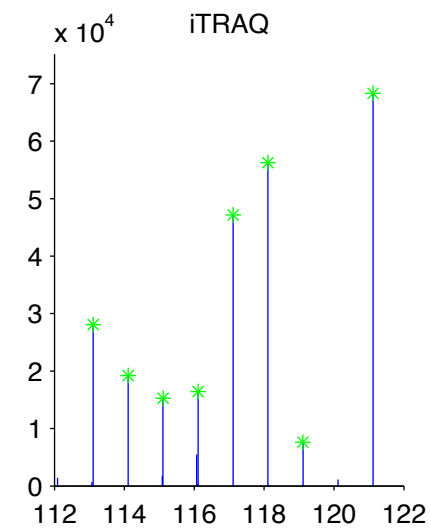

H [ T ] [ D ] [ D ] [ E ] [ m ] [ T ] [ G ] [ y ] [ V ] [ A ] [ T ] [ R ]

mitogen-activated protein kinase 14 isoform 1 [Homo sapiens]

Charge State: +3

Scan Number: 2327

File Name: HJ050711\_GBMxeno\_bio1\_E\_HANNAH.raw

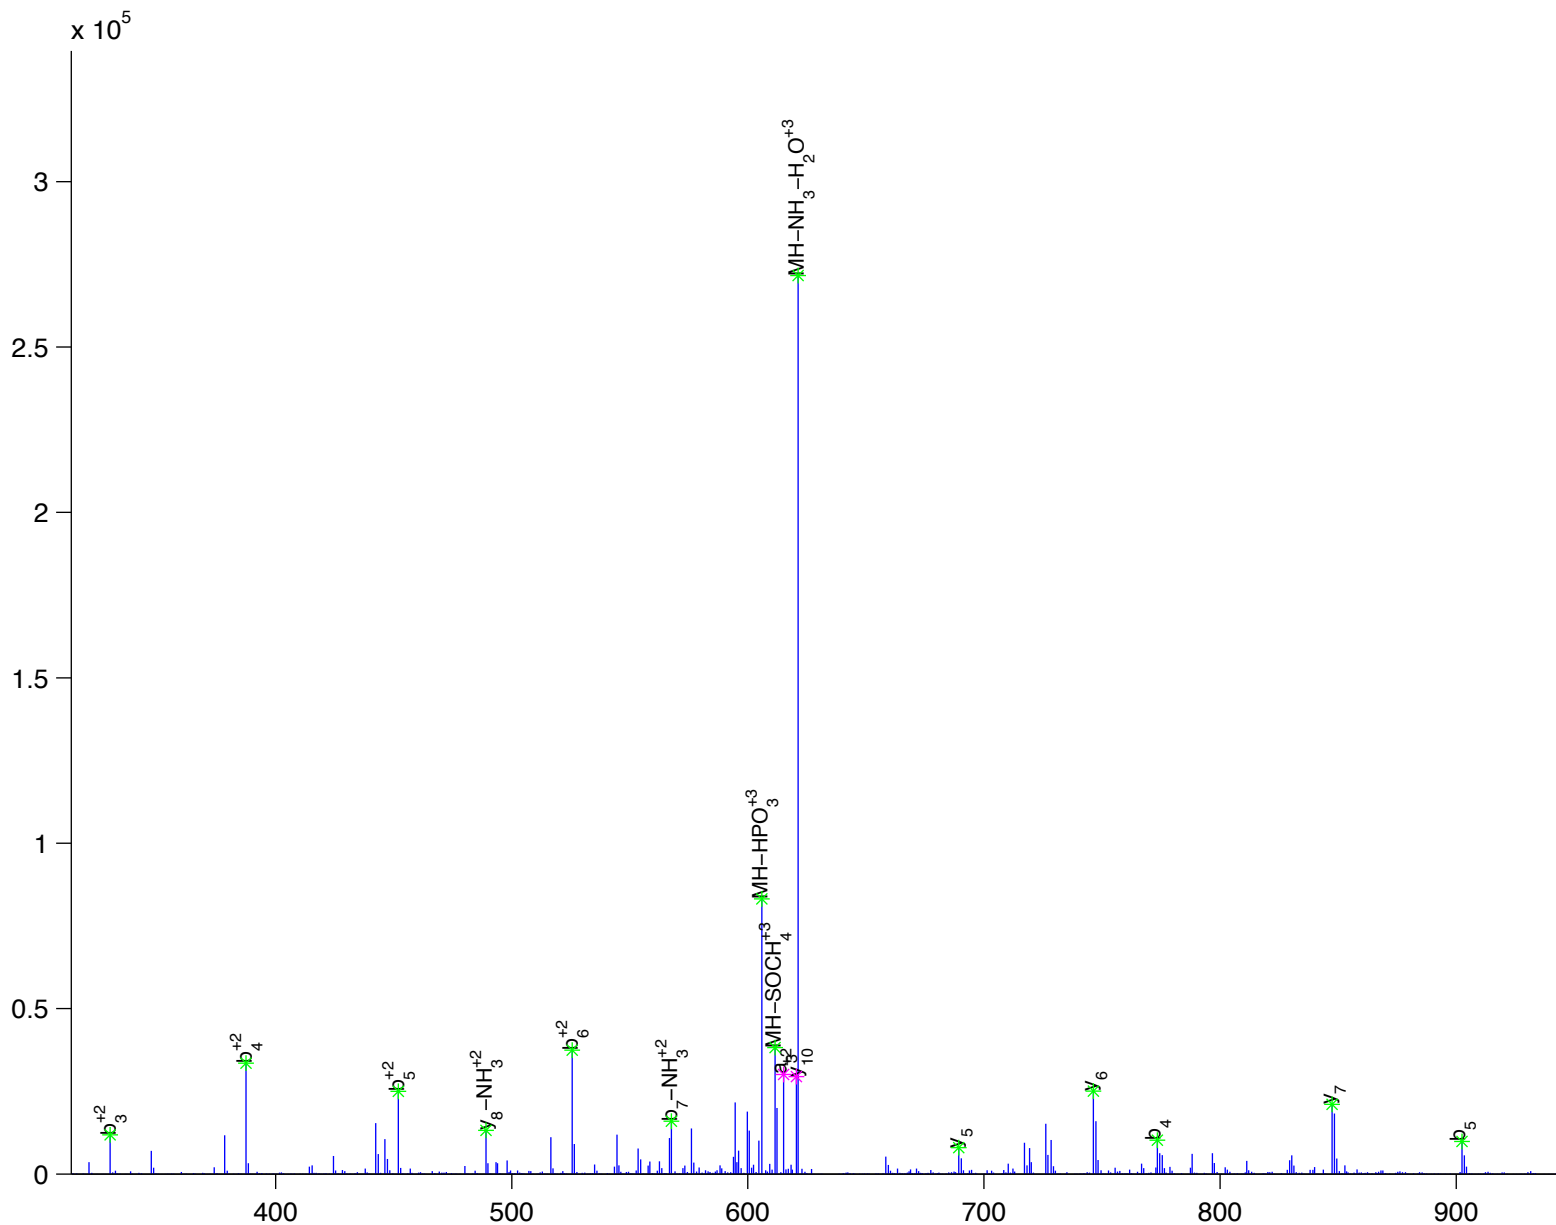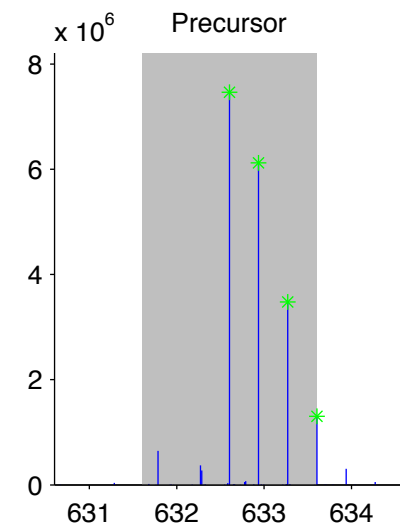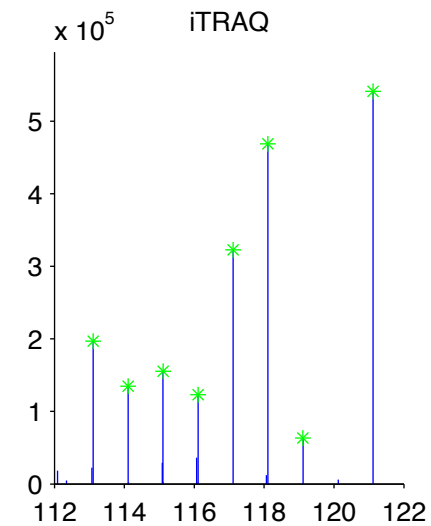

H<sup>+</sup>T<sup>+</sup>D<sup>+</sup>D<sup>+</sup>E<sup>+</sup>m<sup>+</sup>T<sup>+</sup>G<sup>+</sup>y<sup>+</sup>V<sup>+</sup>A<sup>+</sup>T<sup>+</sup>R

mitogen-activated protein kinase 14 isoform 1 [Homo sapiens]

Charge State: +3

Scan Number: 2481

File Name: HJ050711\_GBMxeno\_bio1\_E\_HANNAH.raw

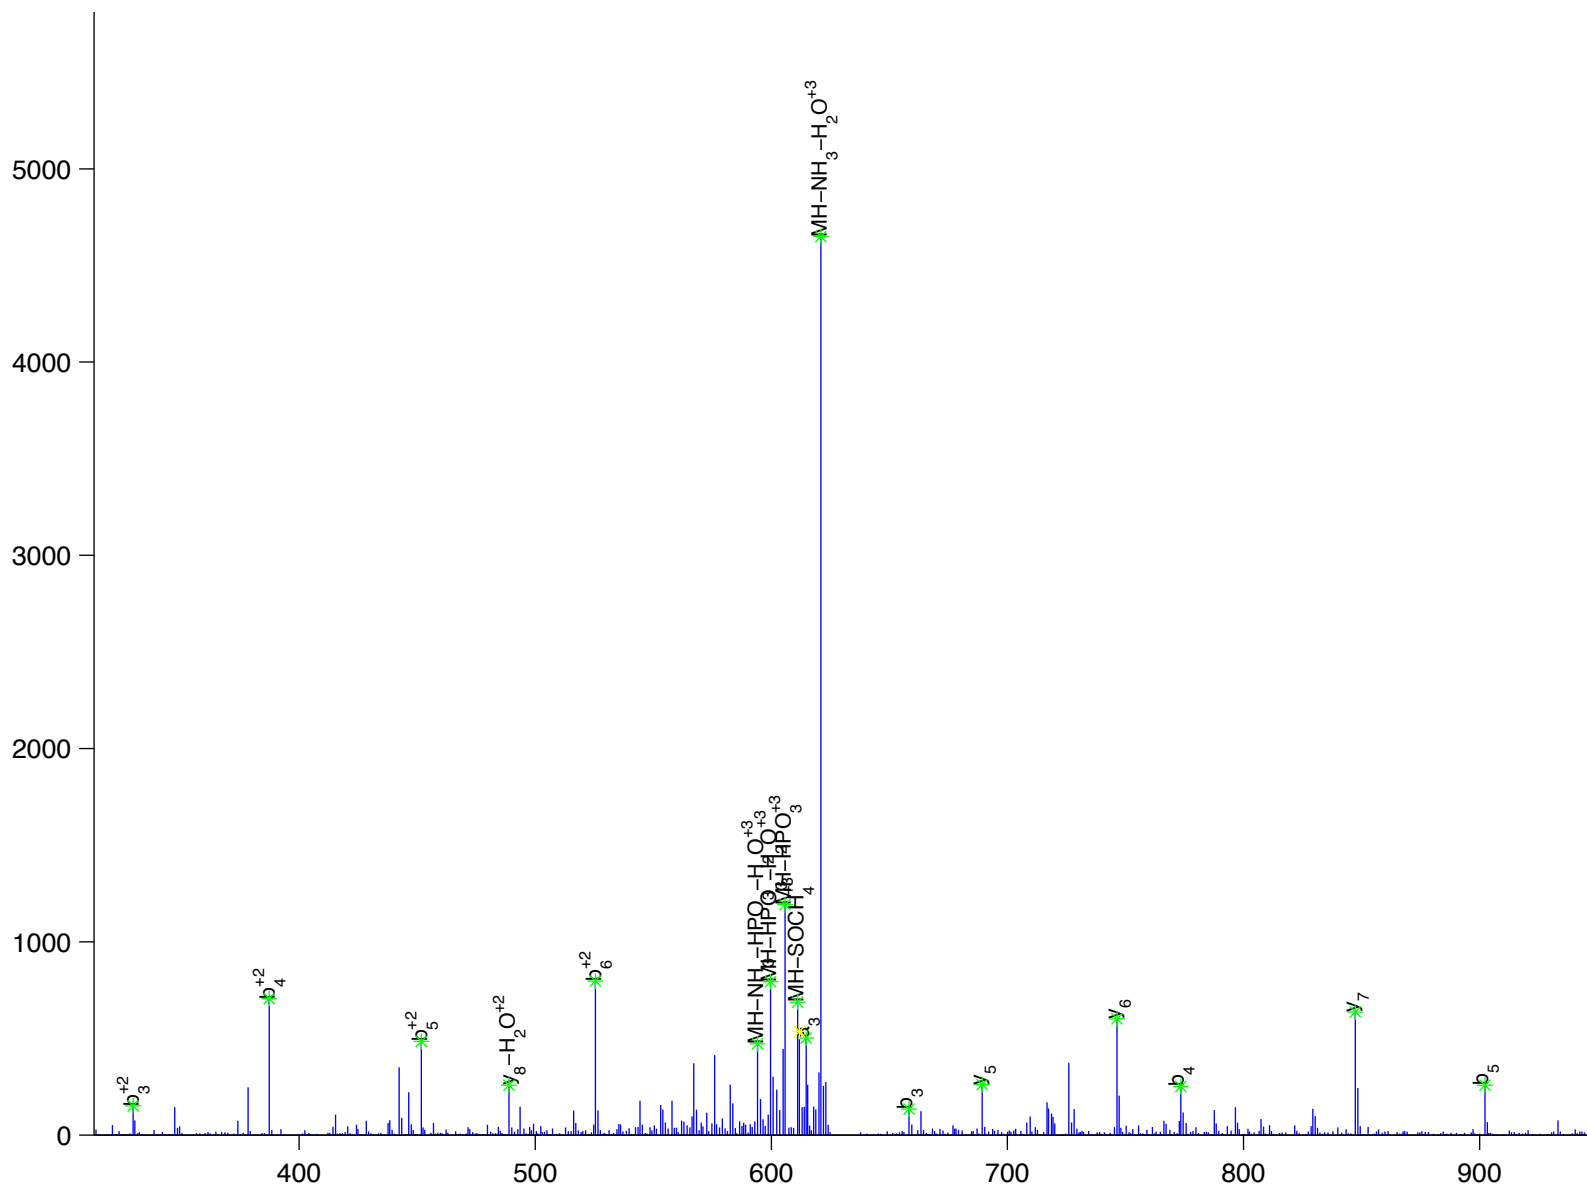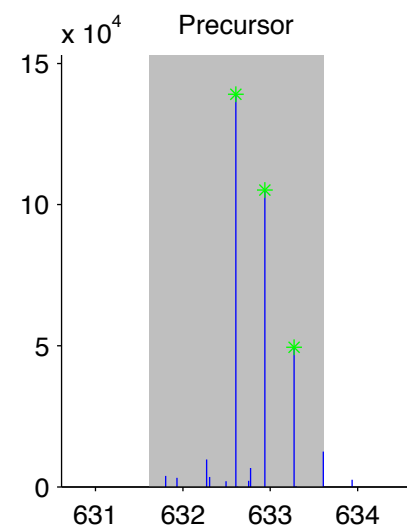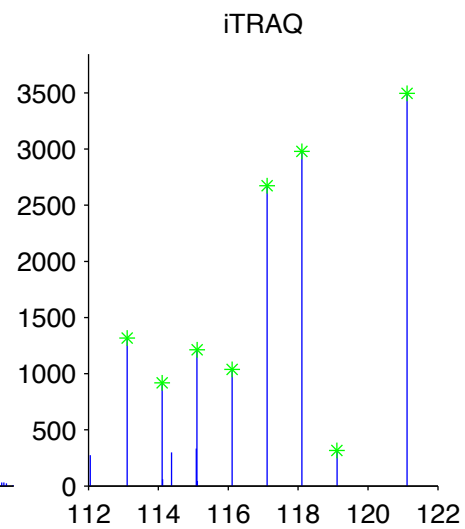

H T D D E m T G y V A T R

mitogen-activated protein kinase 14 isoform 1 [Homo sapiens]

Charge State: +3

Scan Number: 2649

File Name: HJ050711\_GBMxeno\_bio1\_E\_HANNAH.raw

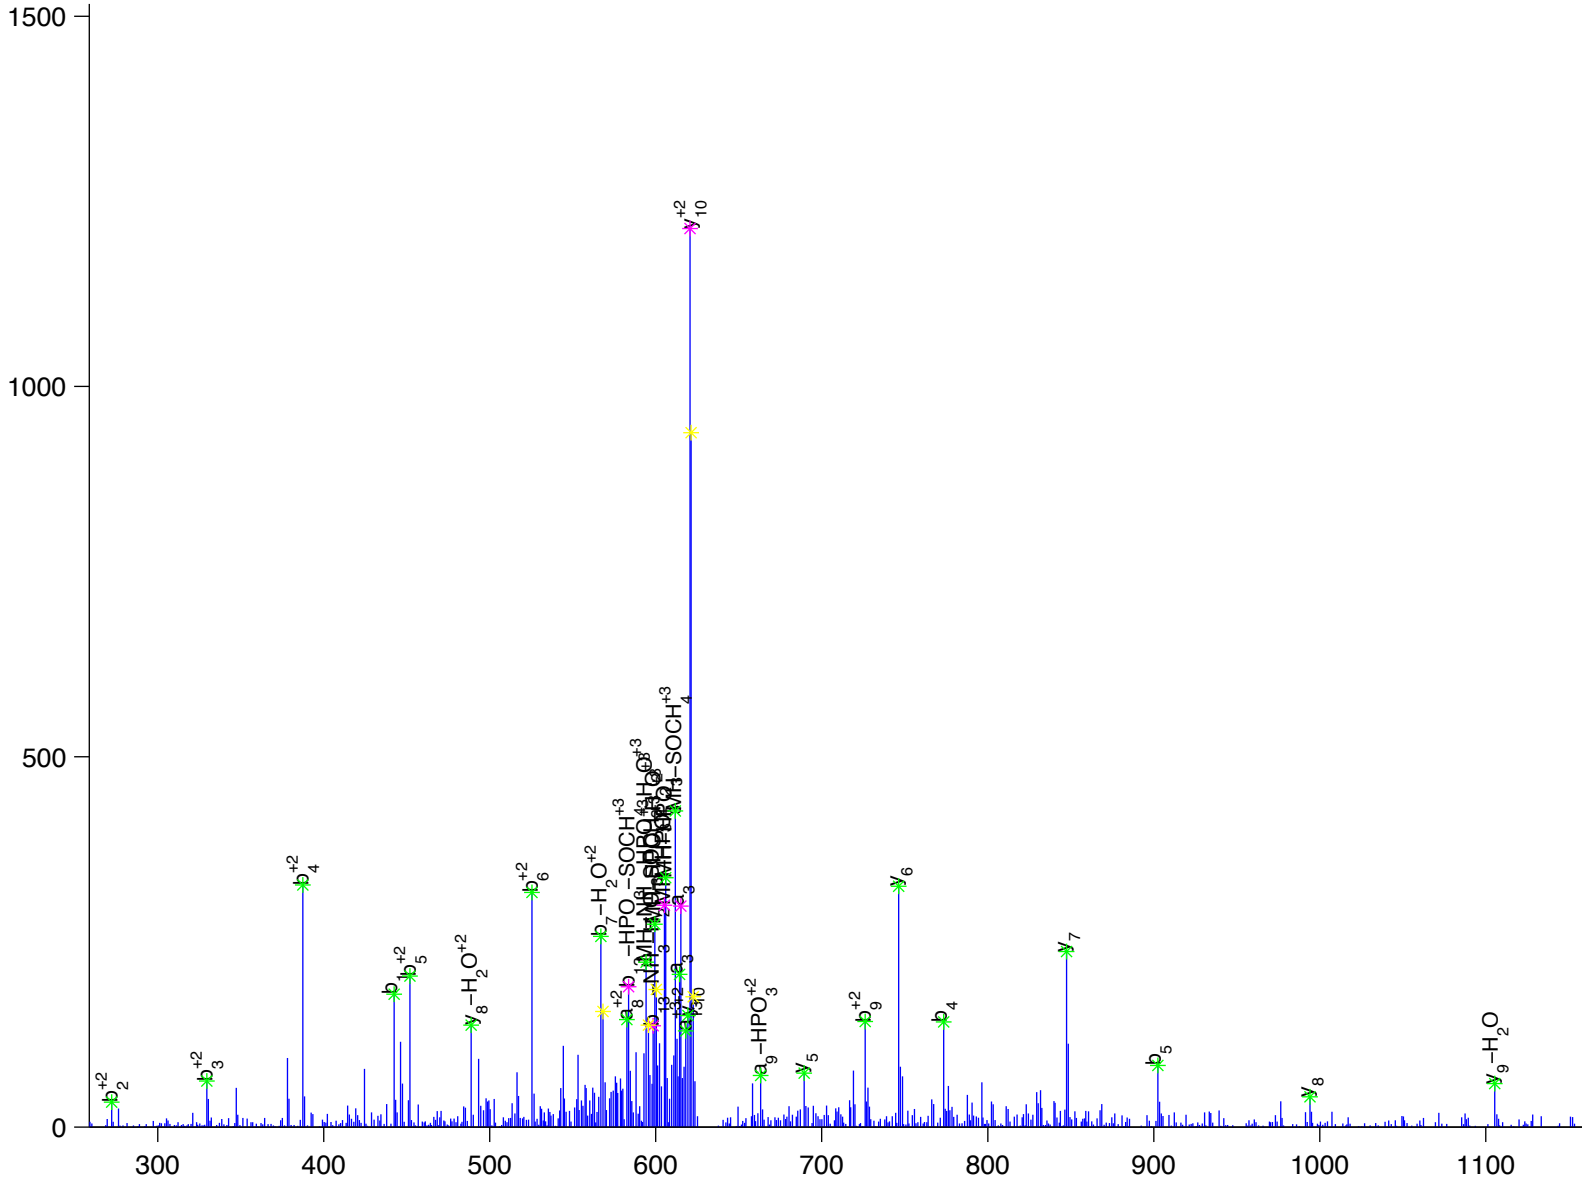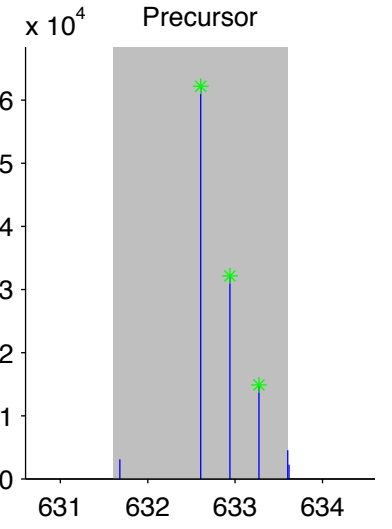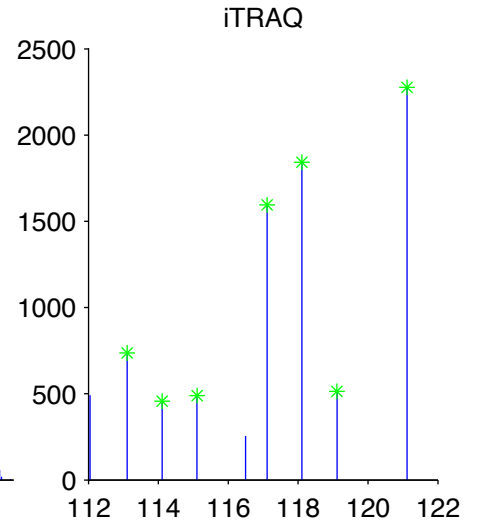

H T D D E m T G y V A T R

mitogen-activated protein kinase 14 isoform 1 [Homo sapiens]

Charge State: +3

Scan Number: 3159

File Name: HJ050711\_GBMxeno\_bio1\_E\_HANNAH.raw

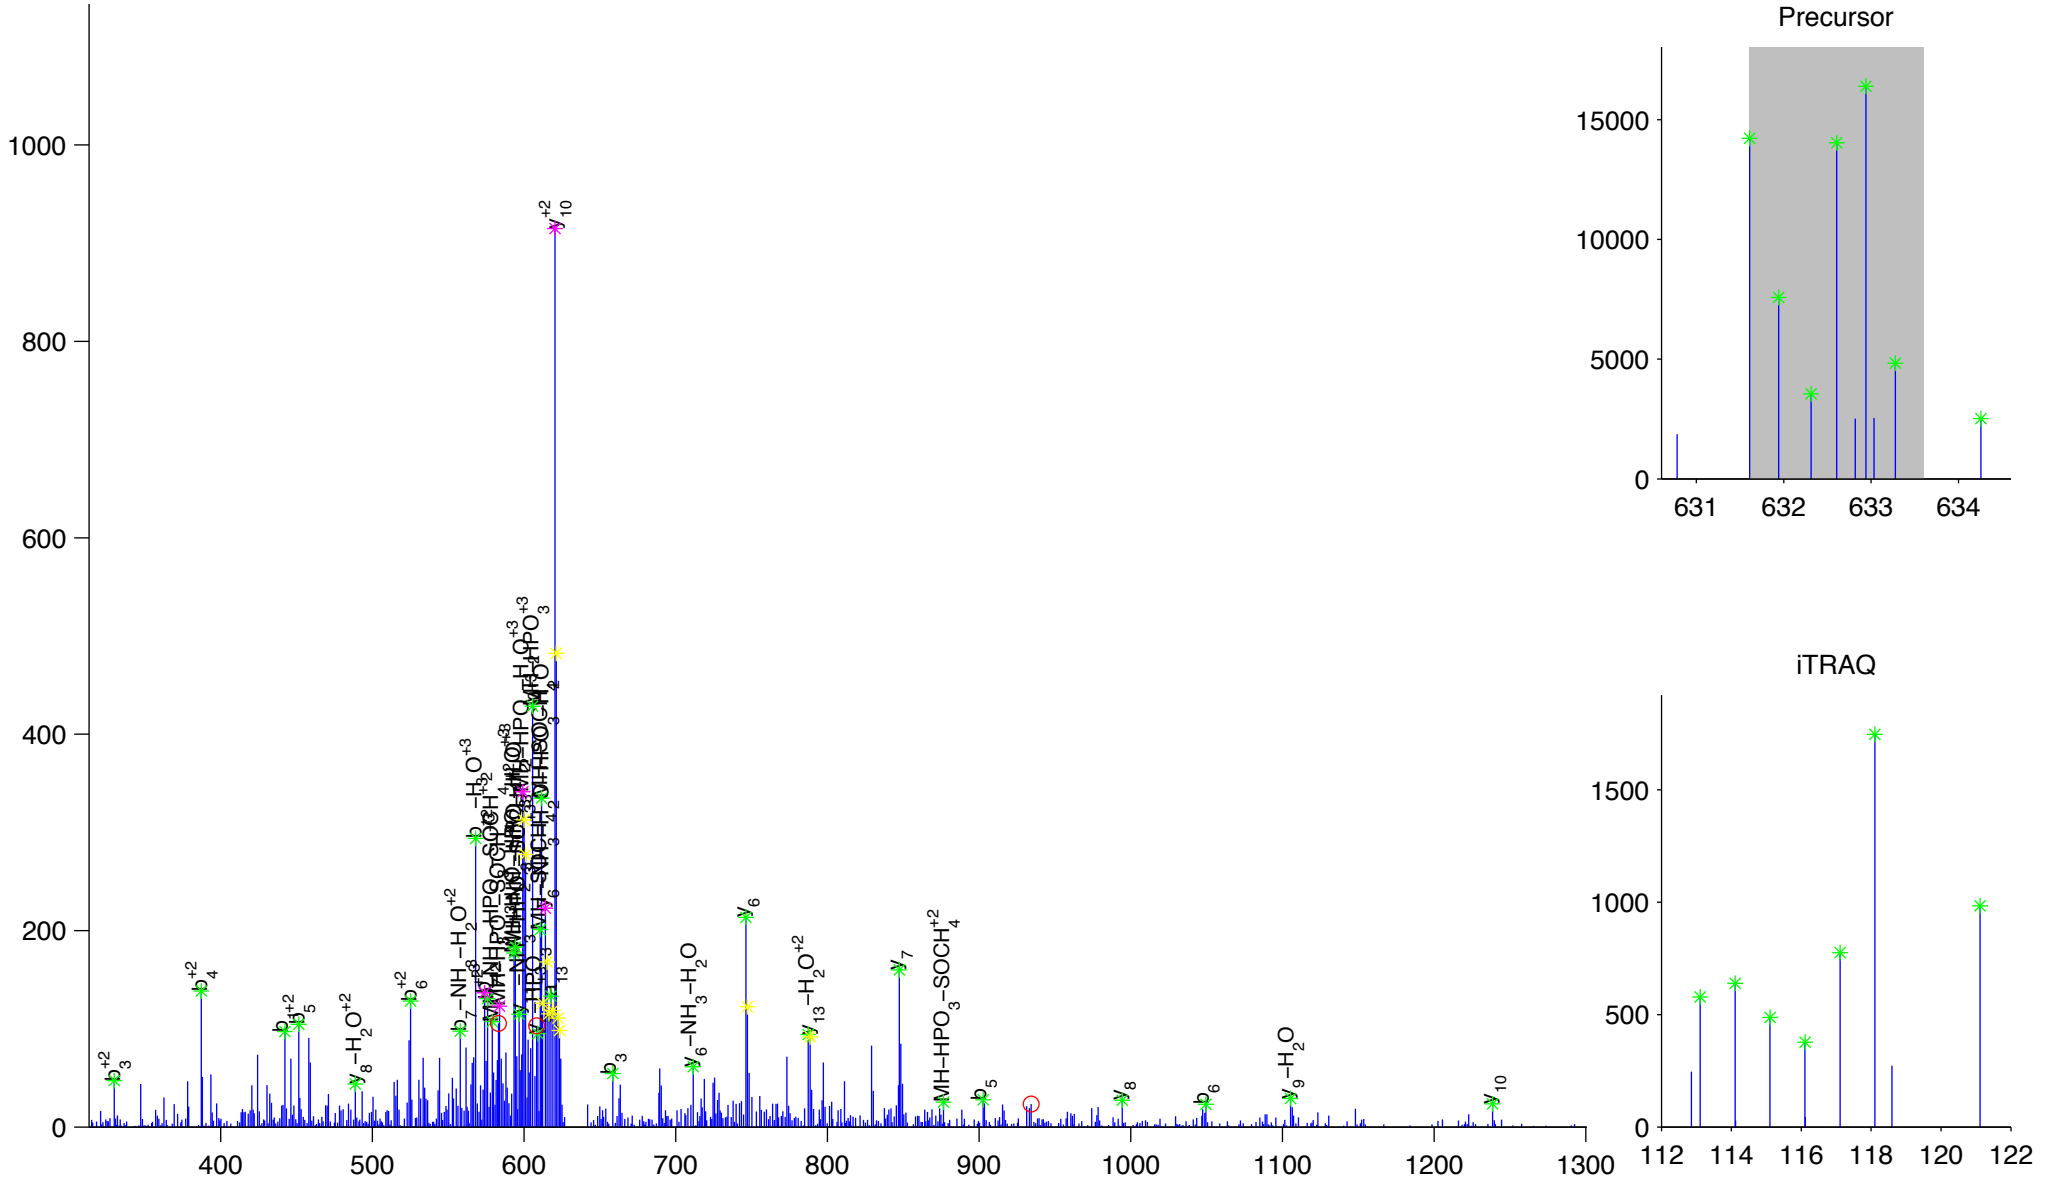

H T D D E M T G y V A T R

mitogen-activated protein kinase 14 isoform 1 [Homo sapiens]

Charge State: +2

Scan Number: 3426

File Name: HJ050711\_GBMxeno\_bio1\_E\_HANNAH.raw

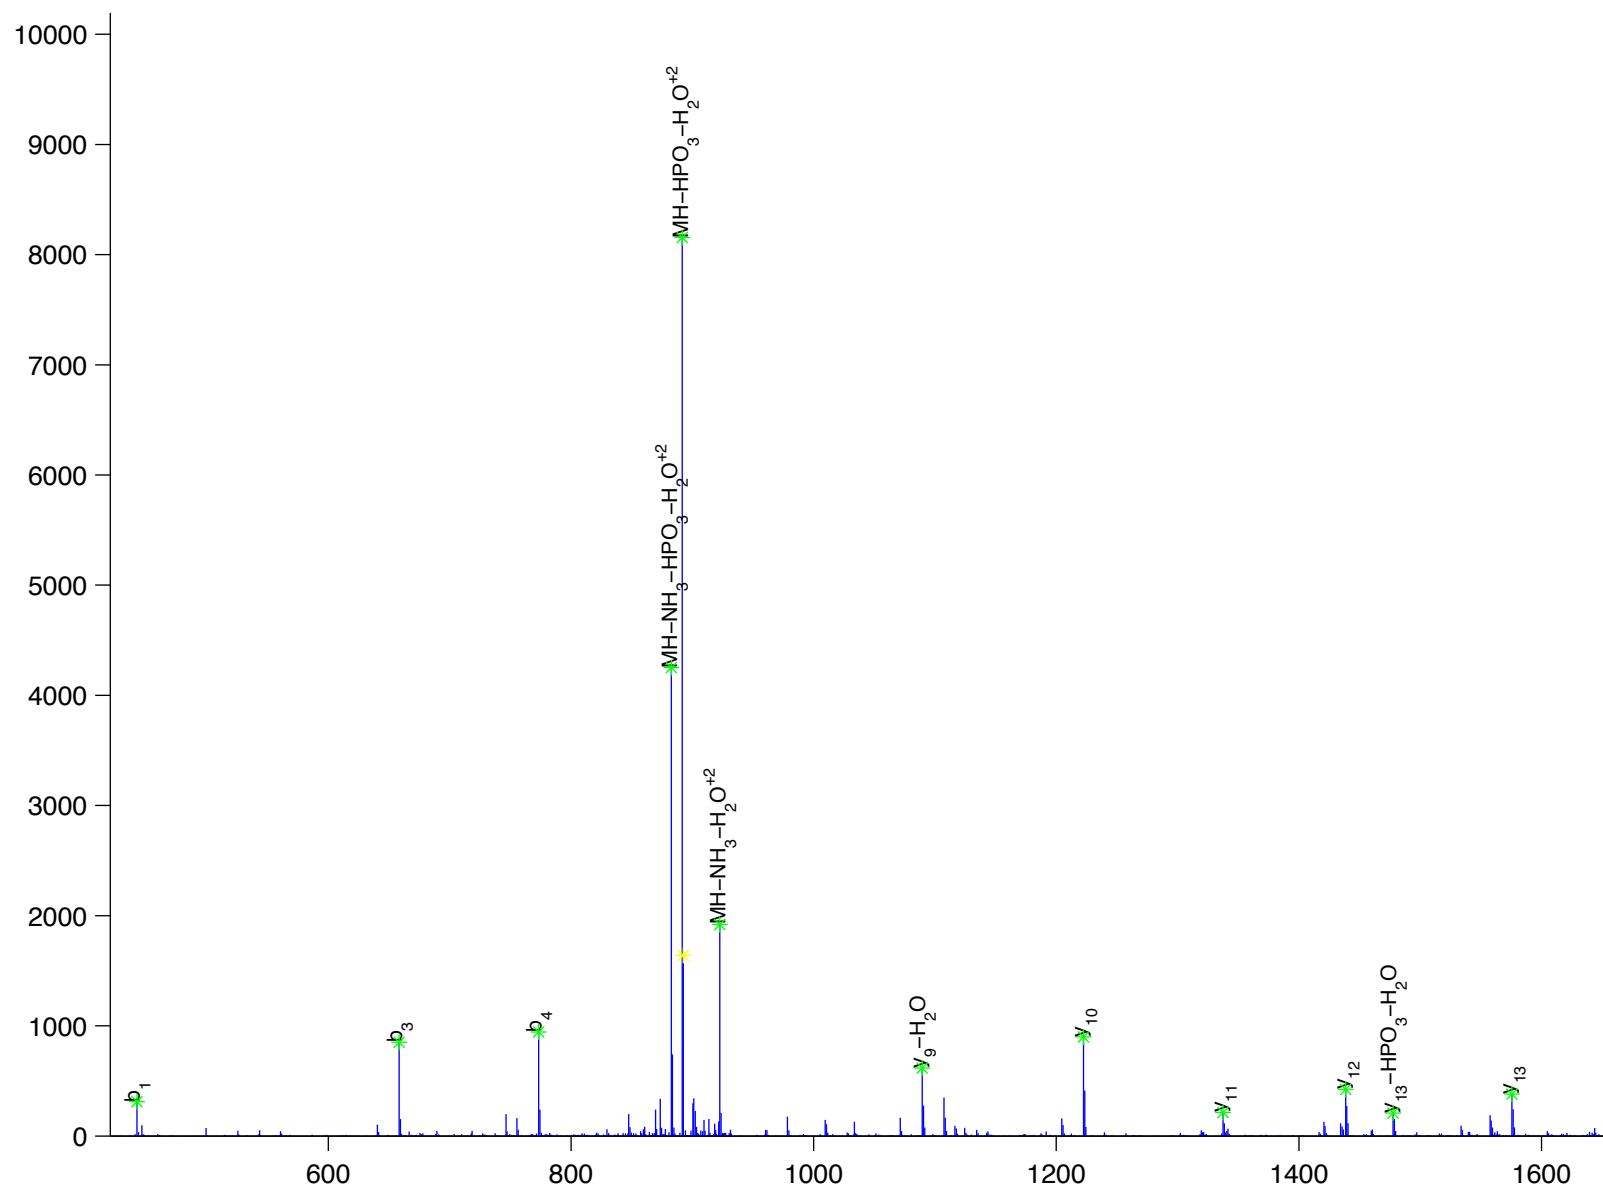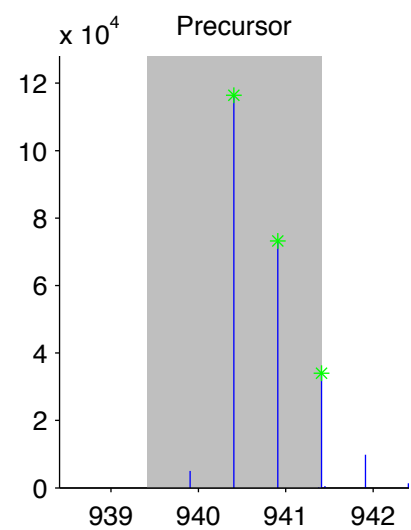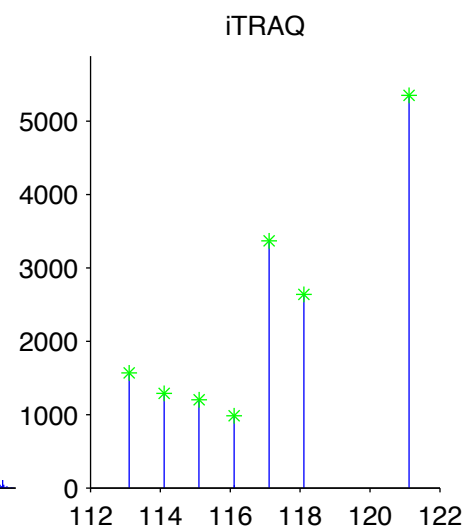

H [ T ] [ D ] [ D ] [ E ] [ M ] [ T ] [ G ] [ y ] [ V ] [ A ] [ T ] [ R ]

mitogen-activated protein kinase 14 isoform 1 [Homo sapiens]

Charge State: +2

Scan Number: 3455

File Name: HJ050711\_GBMxeno\_bio1\_E\_HANNAH.raw

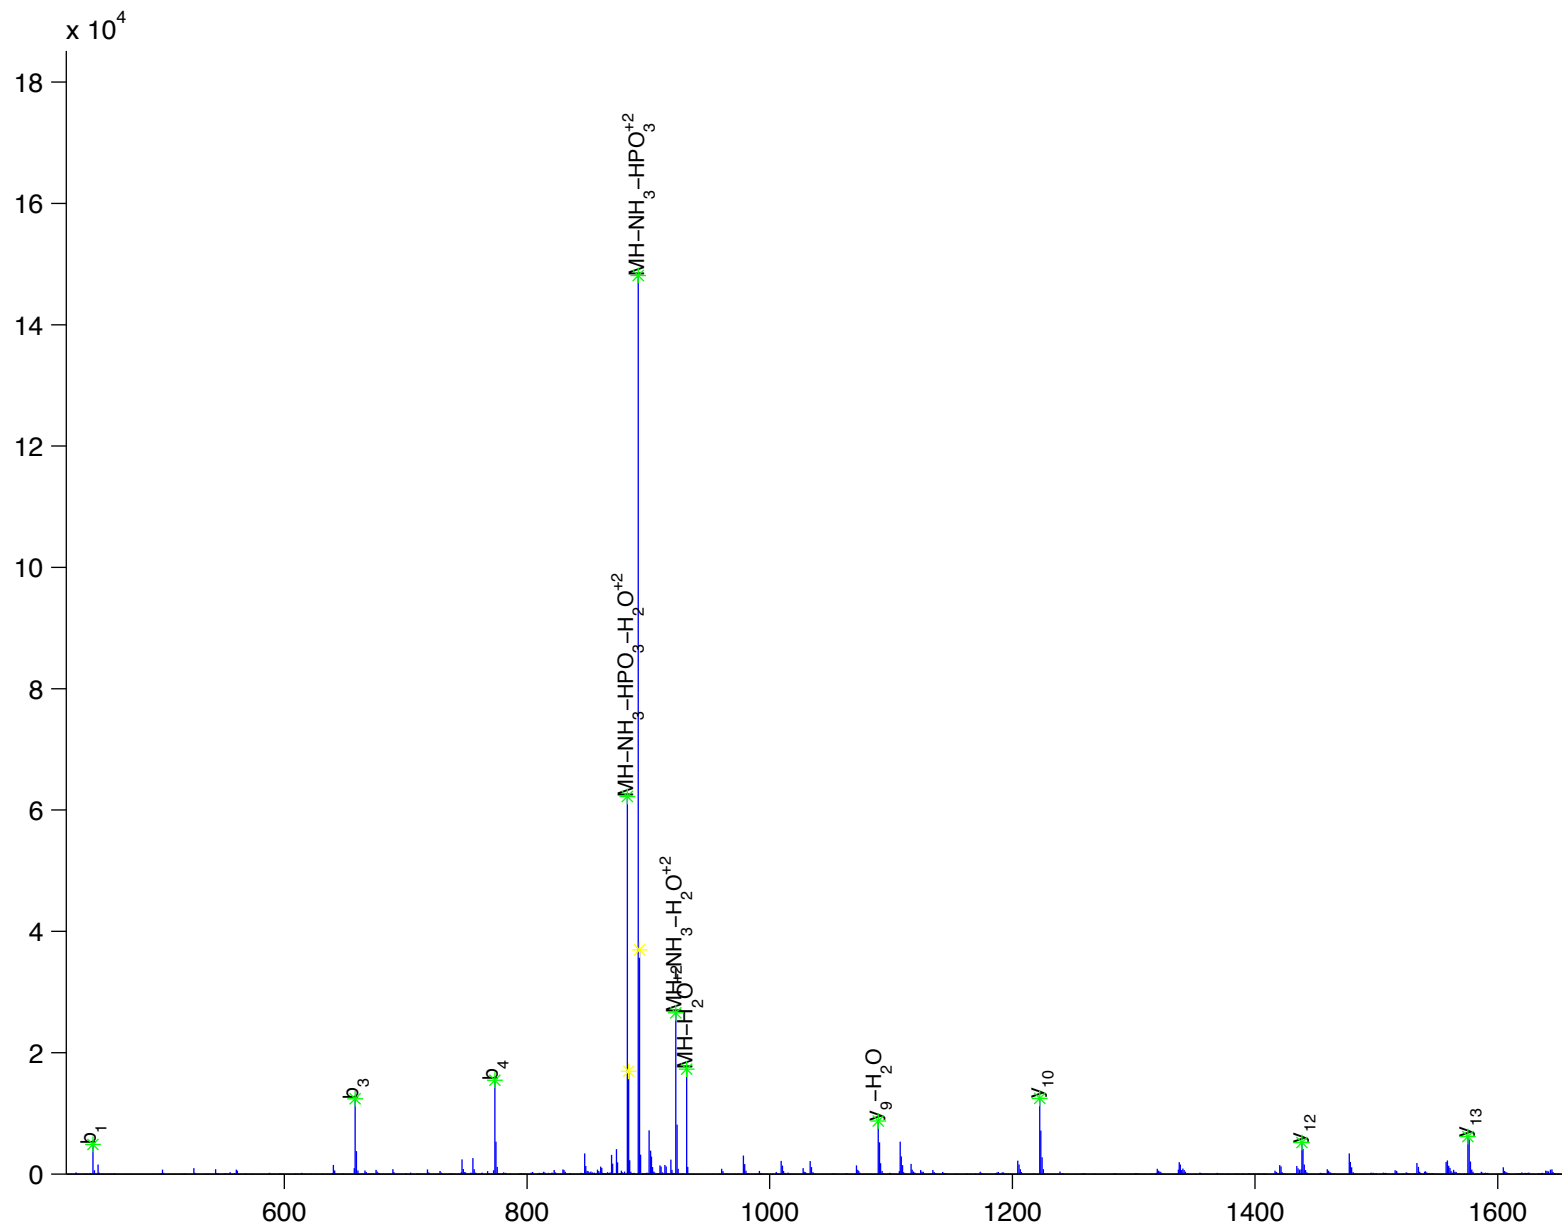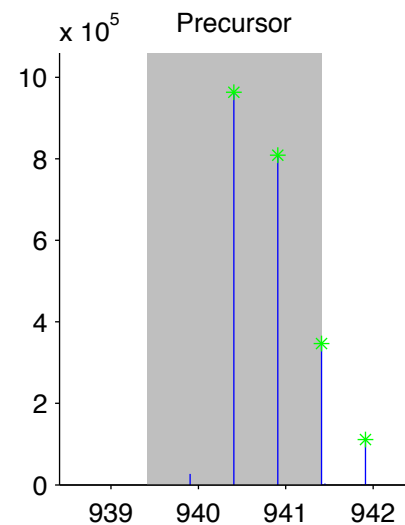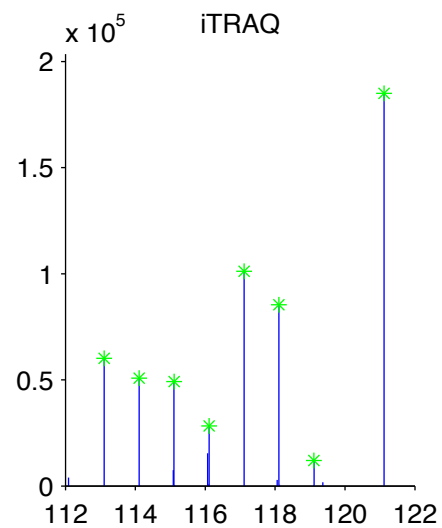



H [ T ] [ D ] [ D ] [ E ] [ M ] [ T ] [ G ] y [ V ] [ A ] [ T ] R

mitogen-activated protein kinase 14 isoform 1 [Homo sapiens]

Charge State: +3

Scan Number: 3552

File Name: HJ050711\_GBMxeno\_bio1\_E\_HANNAH.raw

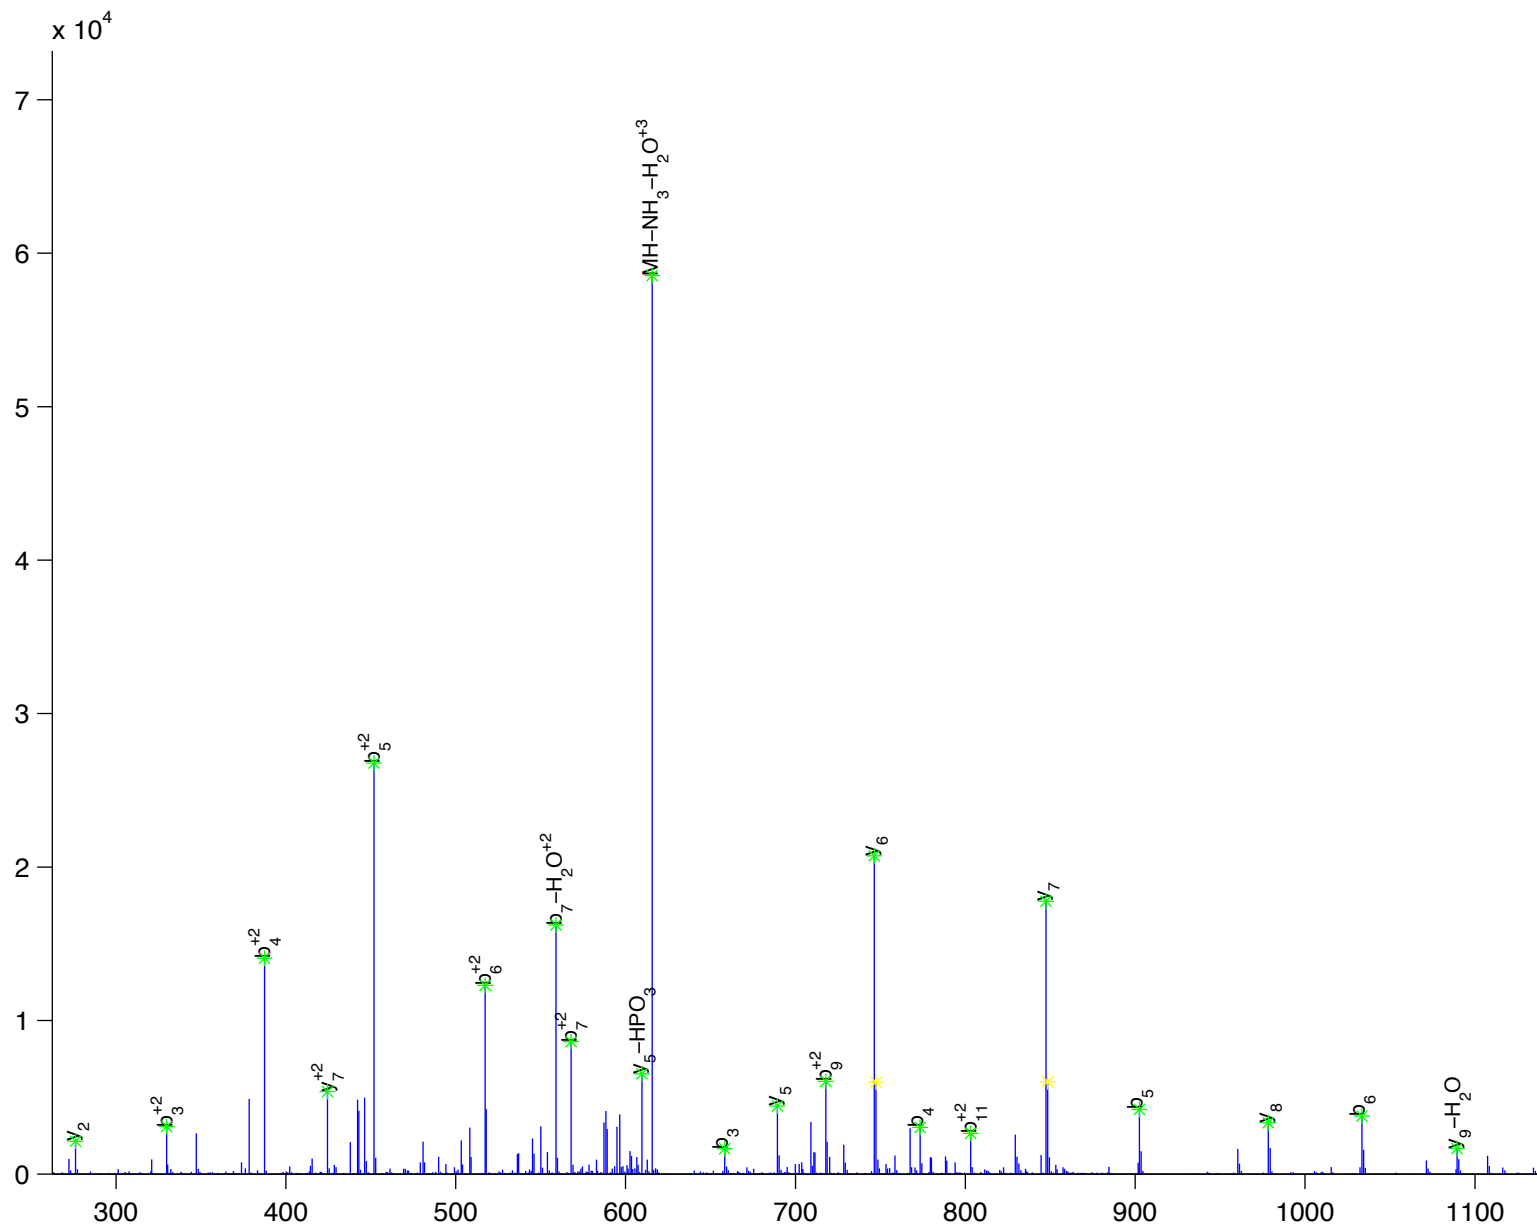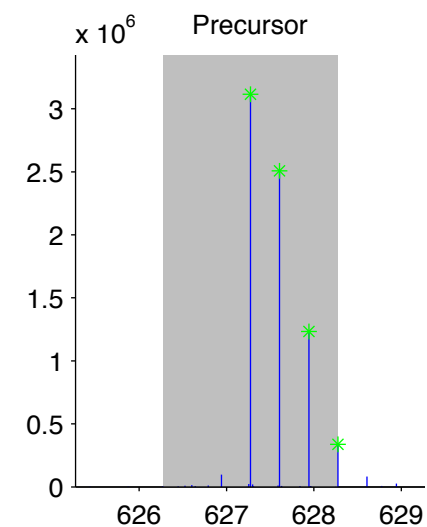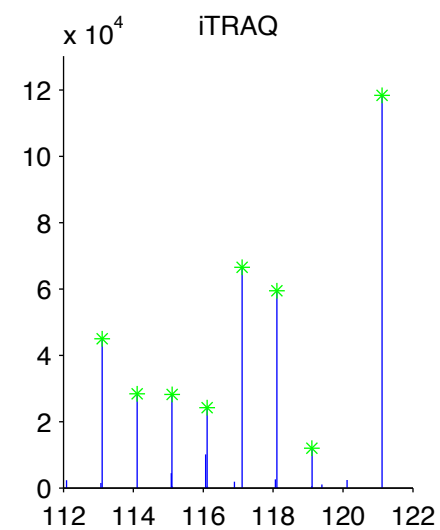

H T D D E M T G y V A T R

mitogen-activated protein kinase 14 isoform 1 [Homo sapiens]

Charge State: +2

Scan Number: 3594

File Name: HJ050711\_GBMxeno\_bio1\_E\_HANNAH.raw

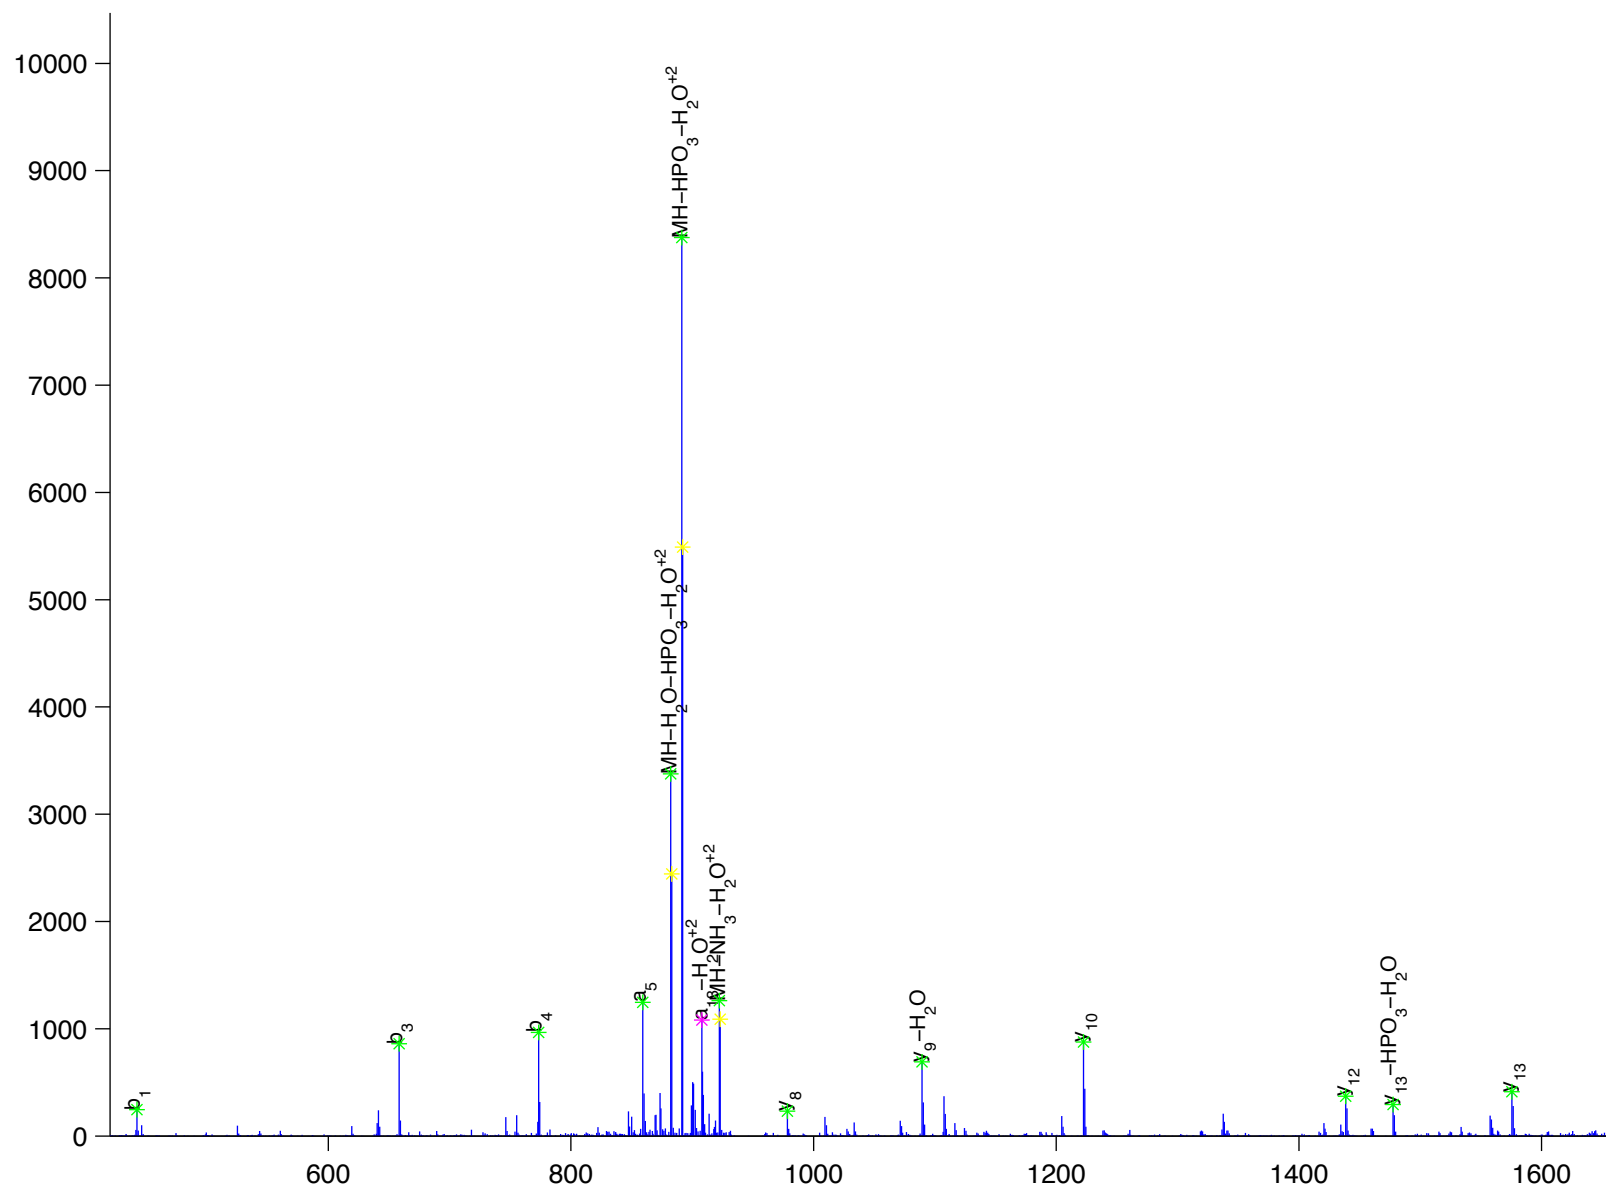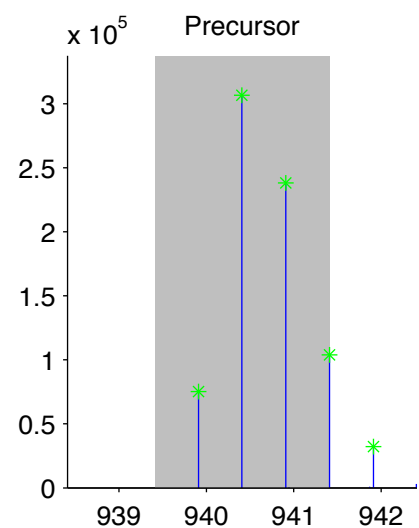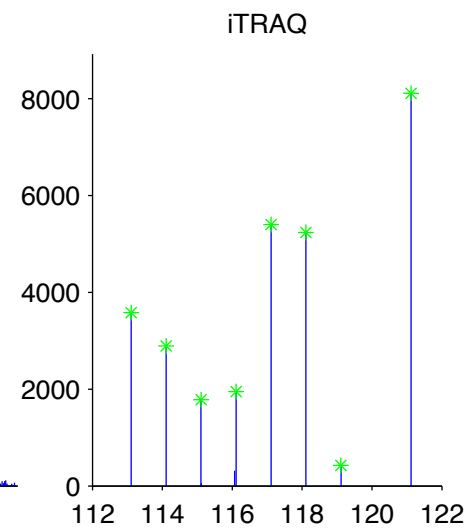

H [ T ] [ D ] [ D ] [ E ] [ M ] [ T ] [ G ] [ y ] [ V ] [ A ] [ T ] [ R ]

mitogen-activated protein kinase 14 isoform 1 [Homo sapiens]

Charge State: +2

Scan Number: 3625

File Name: HJ050711\_GBMxeno\_bio1\_E\_HANNAH.raw

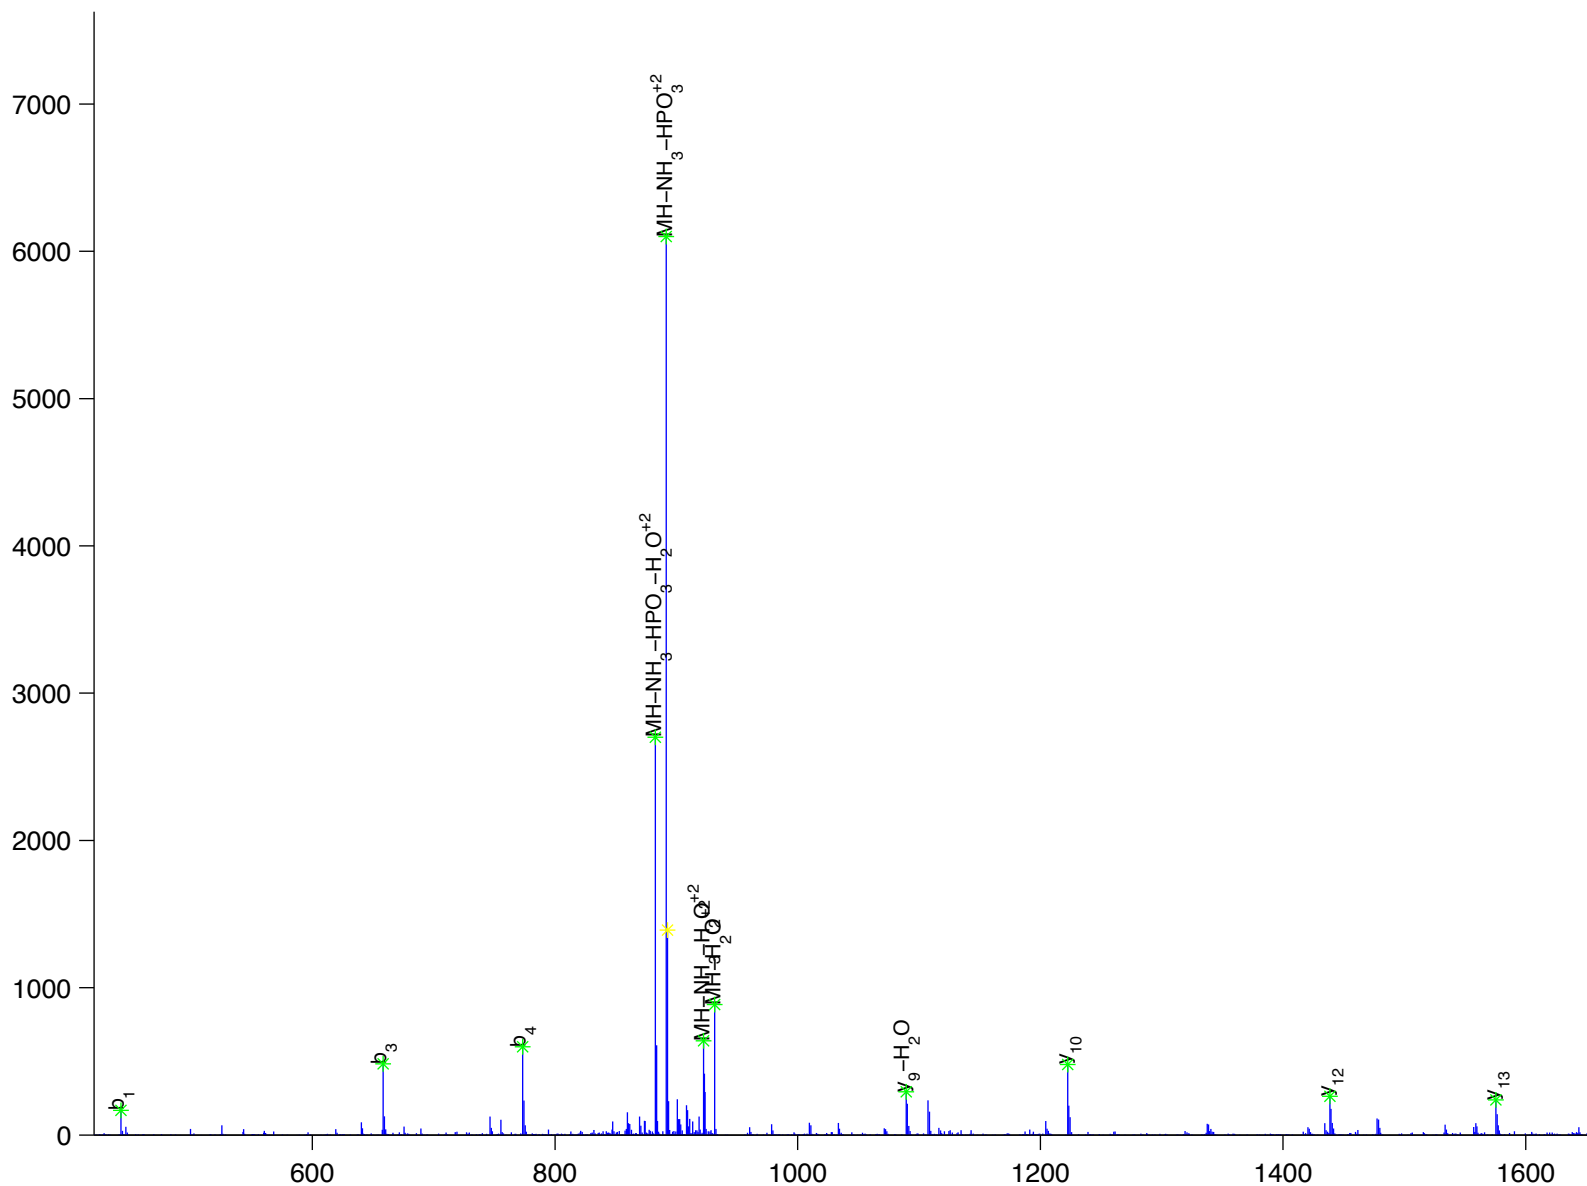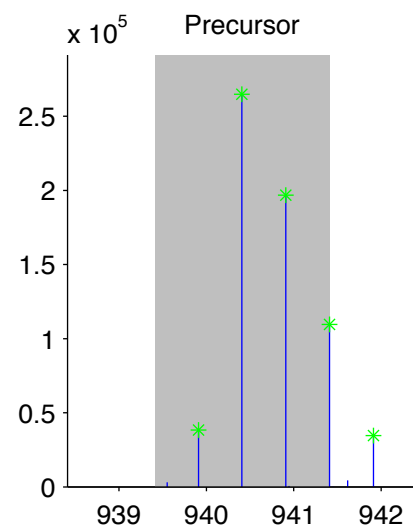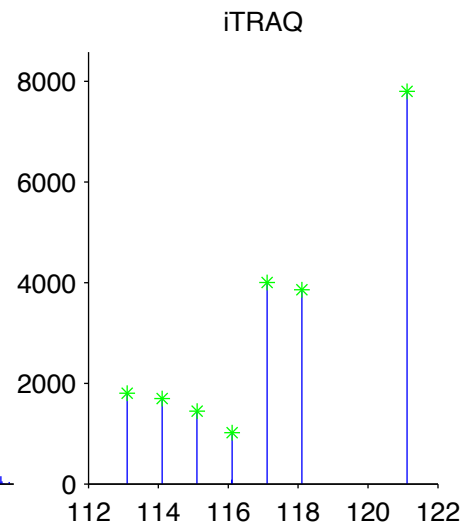

H [ T ] [ D ] [ D ] [ E ] [ M ] t [ G ] y [ V ] A [ T ] R

mitogen-activated protein kinase 14 isoform 1 [Homo sapiens]

Charge State: +3

Scan Number: 3699

File Name: HJ050711\_GBMxeno\_bio1\_E\_HANNAH.raw

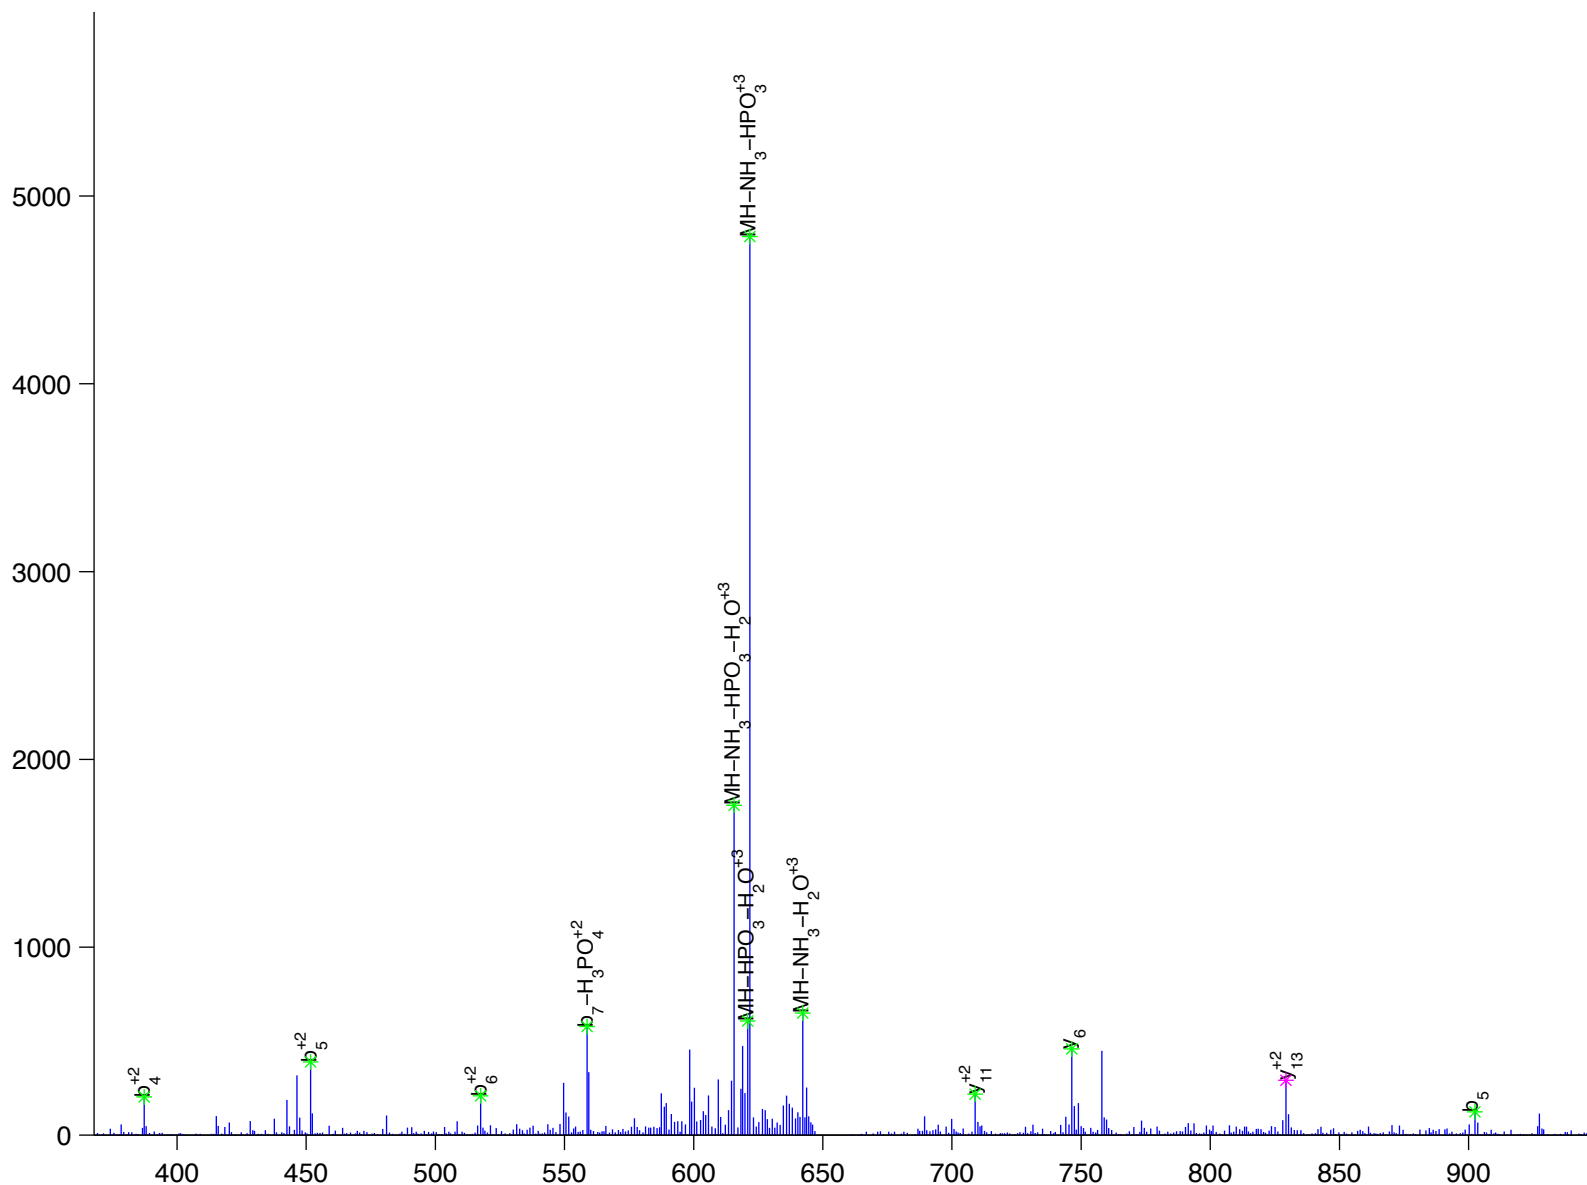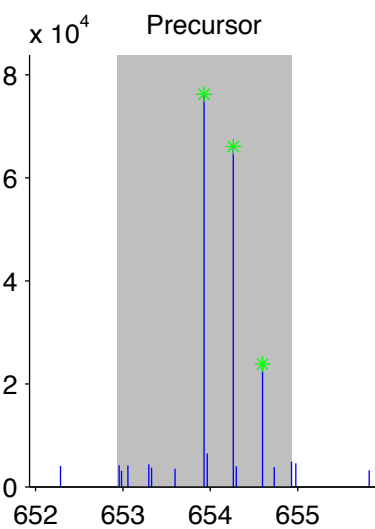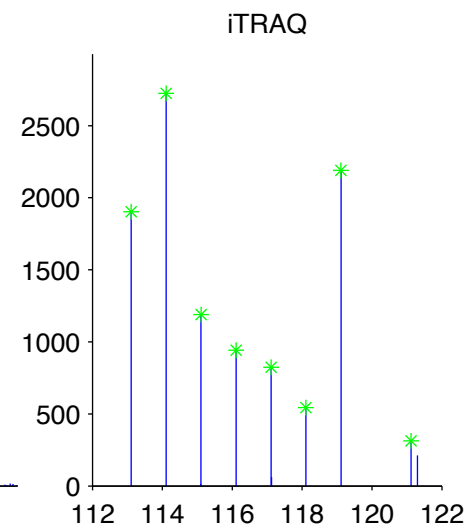

H [ T ] [ D ] [ D ] [ E ] [ M ] [ T ] [ G ] y [ V ] [ A ] [ T ] R

mitogen-activated protein kinase 14 isoform 1 [Homo sapiens]

Charge State: +3

Scan Number: 3720

File Name: HJ050711\_GBMxeno\_bio1\_E\_HANNAH.raw

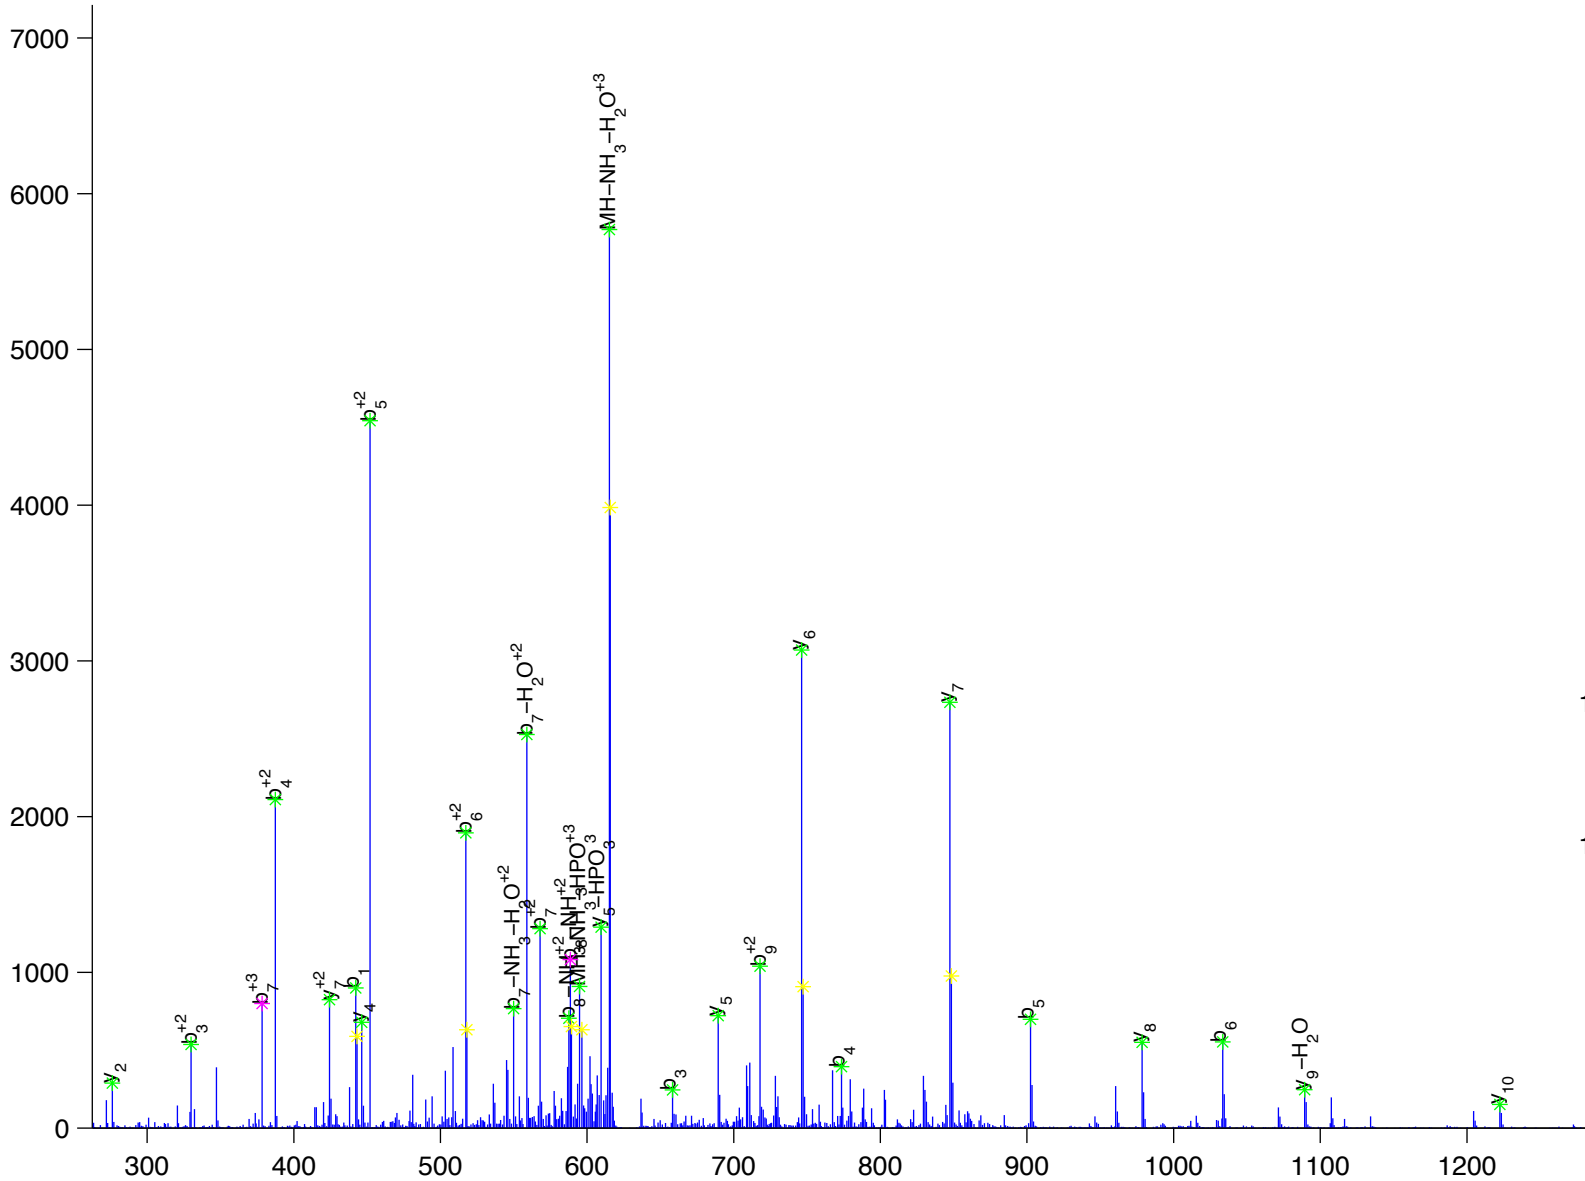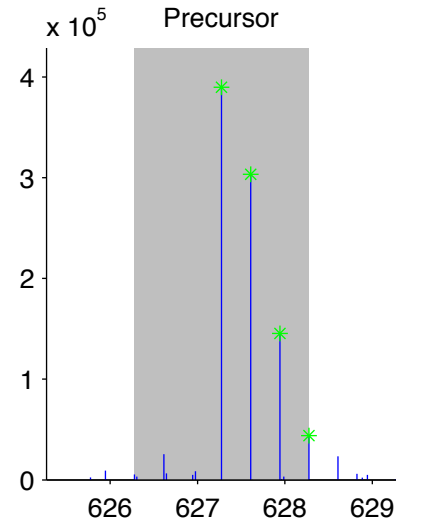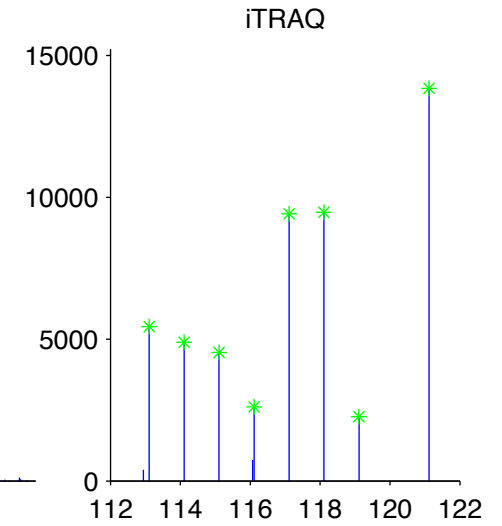

H  
[ T ]  
[ [ D ]  
[ [ D ]  
[ [ E ]  
[ [ M ]  
[ [ t ]  
[ [ G ]  
[ [ y ]  
[ [ V ]  
[ [ A ]  
[ [ T ]  
R

mitogen-activated protein kinase 14 isoform 1 [Homo sapiens]

Charge State: +3

Scan Number: 3867

File Name: HJ050711\_GBMxeno\_bio1\_E\_HANNAH.raw

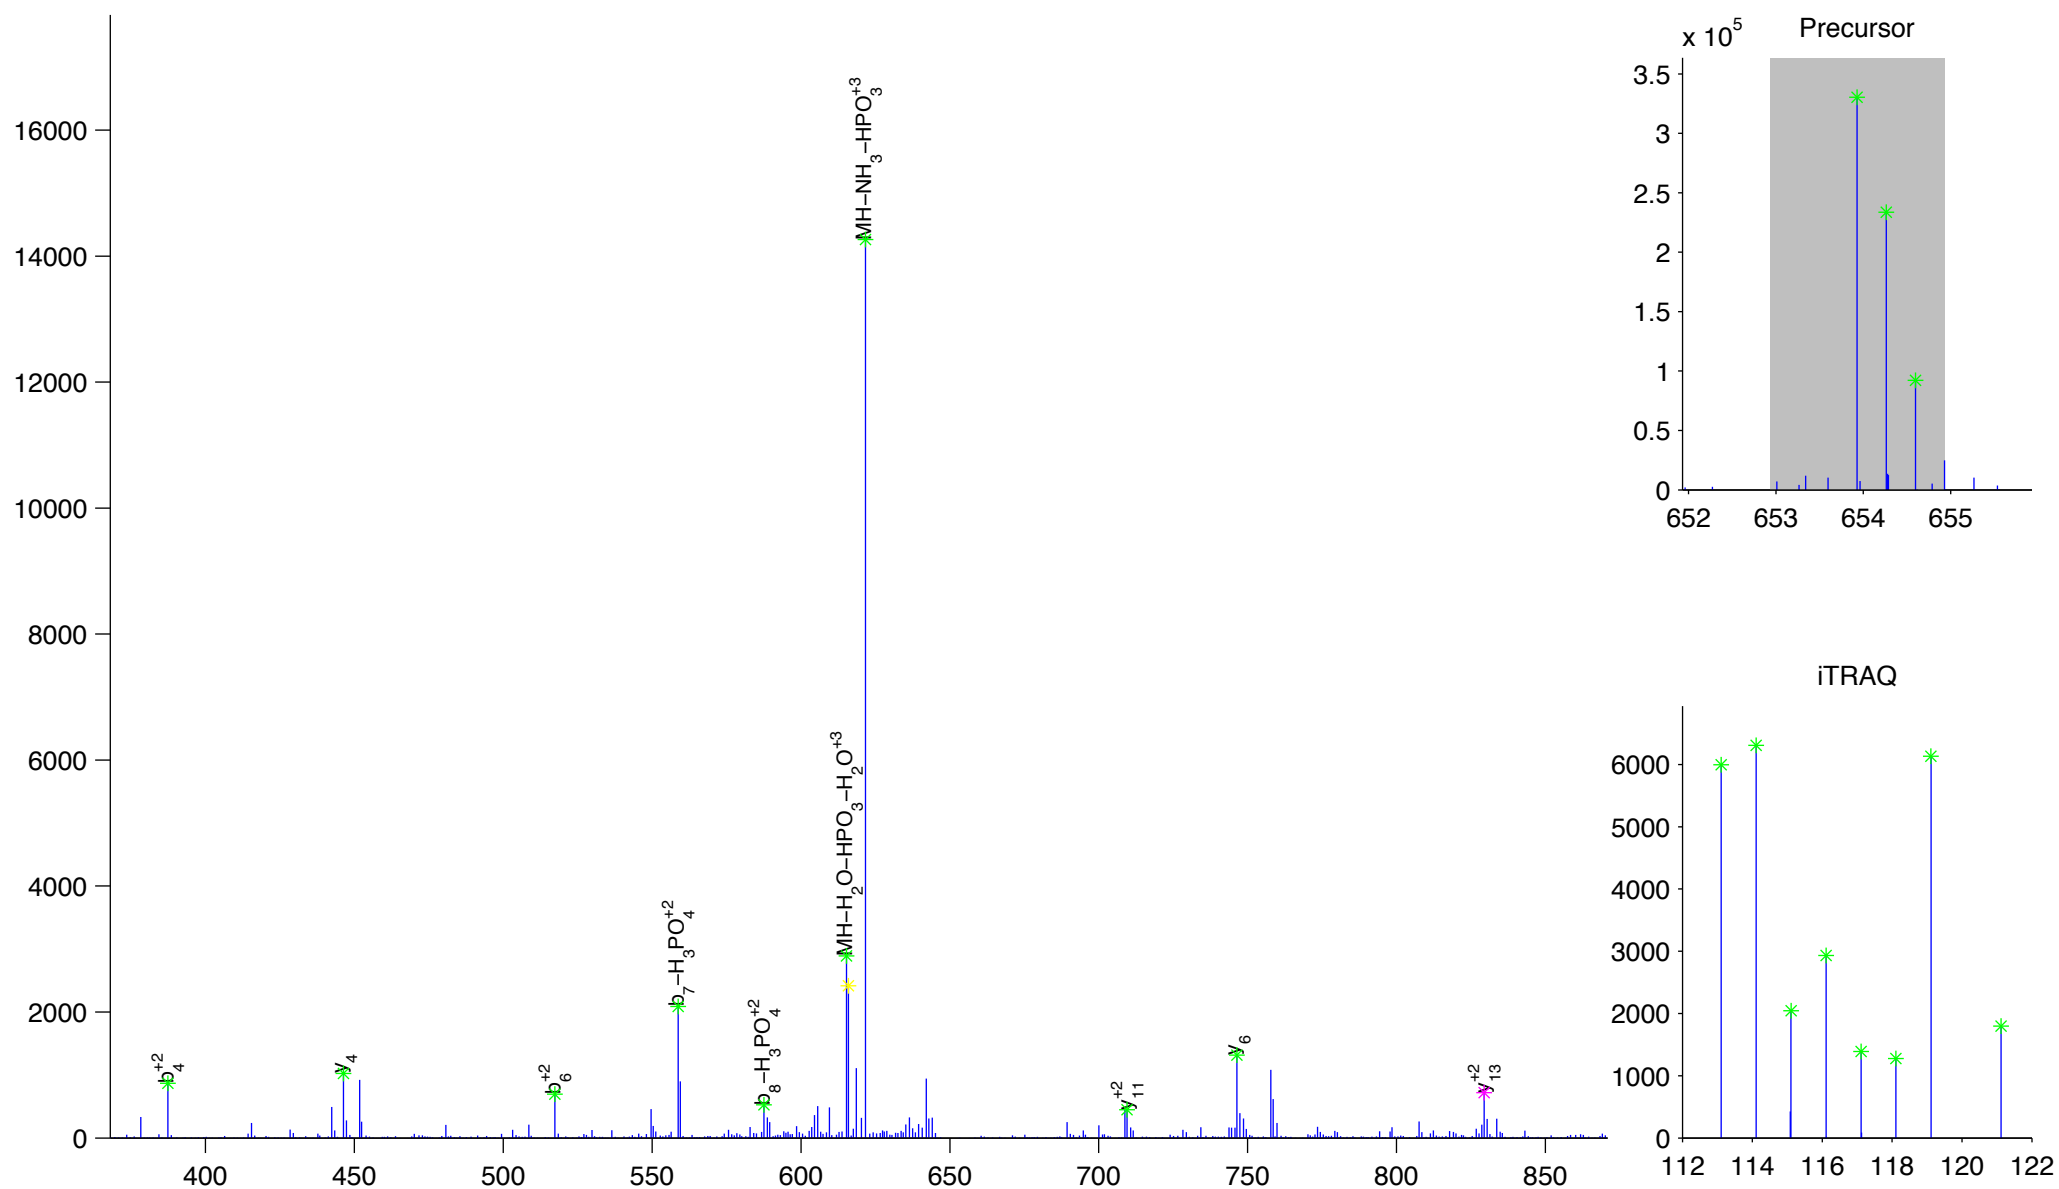

H [ T ] [ D ] [ D ] [ E ] [ M ] [ T ] [ G ] y [ V ] [ A ] [ T ] R

mitogen-activated protein kinase 14 isoform 1 [Homo sapiens]

Charge State: +3

Scan Number: 3888

File Name: HJ050711\_GBMxeno\_bio1\_E\_HANNAH.raw

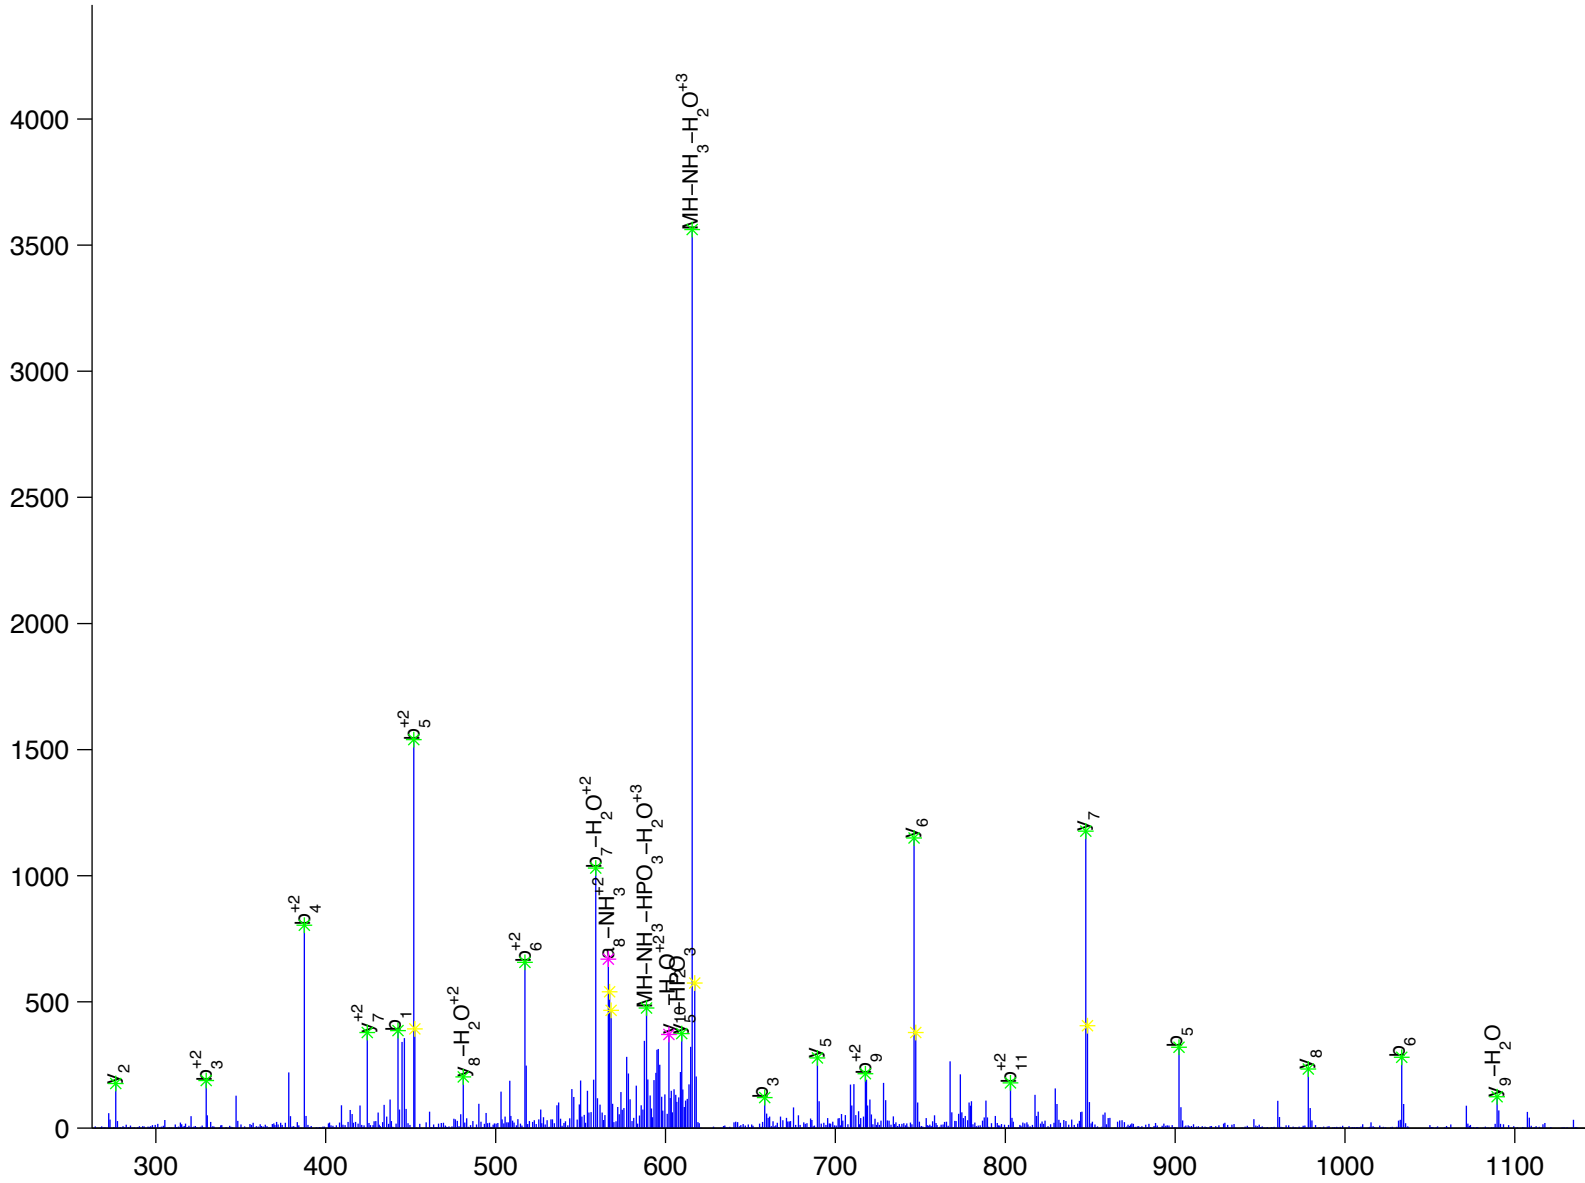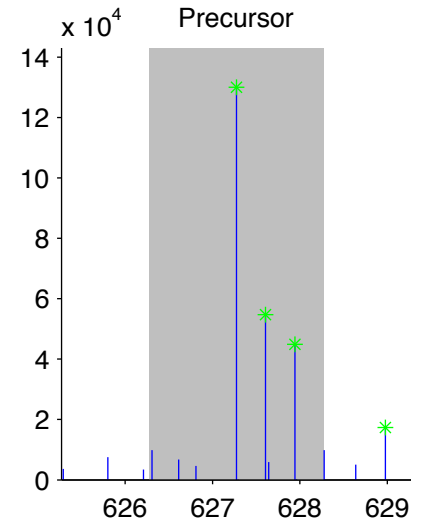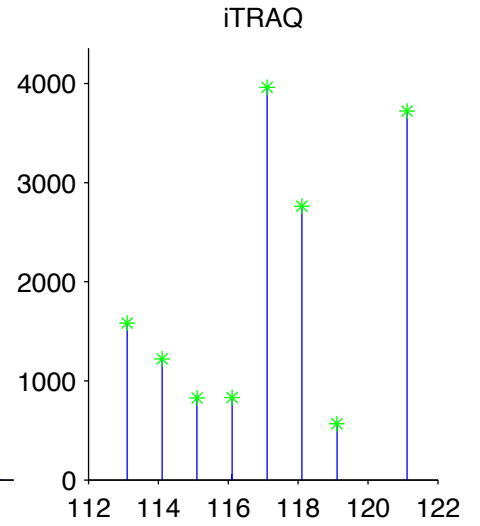

H  
[ T ]  
[ D ]  
[ D ]  
[ E ]  
[ M ]  
t  
[ G ]  
y  
[ V ]  
[ A ]  
[ T ]  
R

mitogen-activated protein kinase 14 isoform 1 [Homo sapiens]

Charge State: +3

Scan Number: 4039

File Name: HJ050711\_GBMxeno\_bio1\_E\_HANNAH.raw

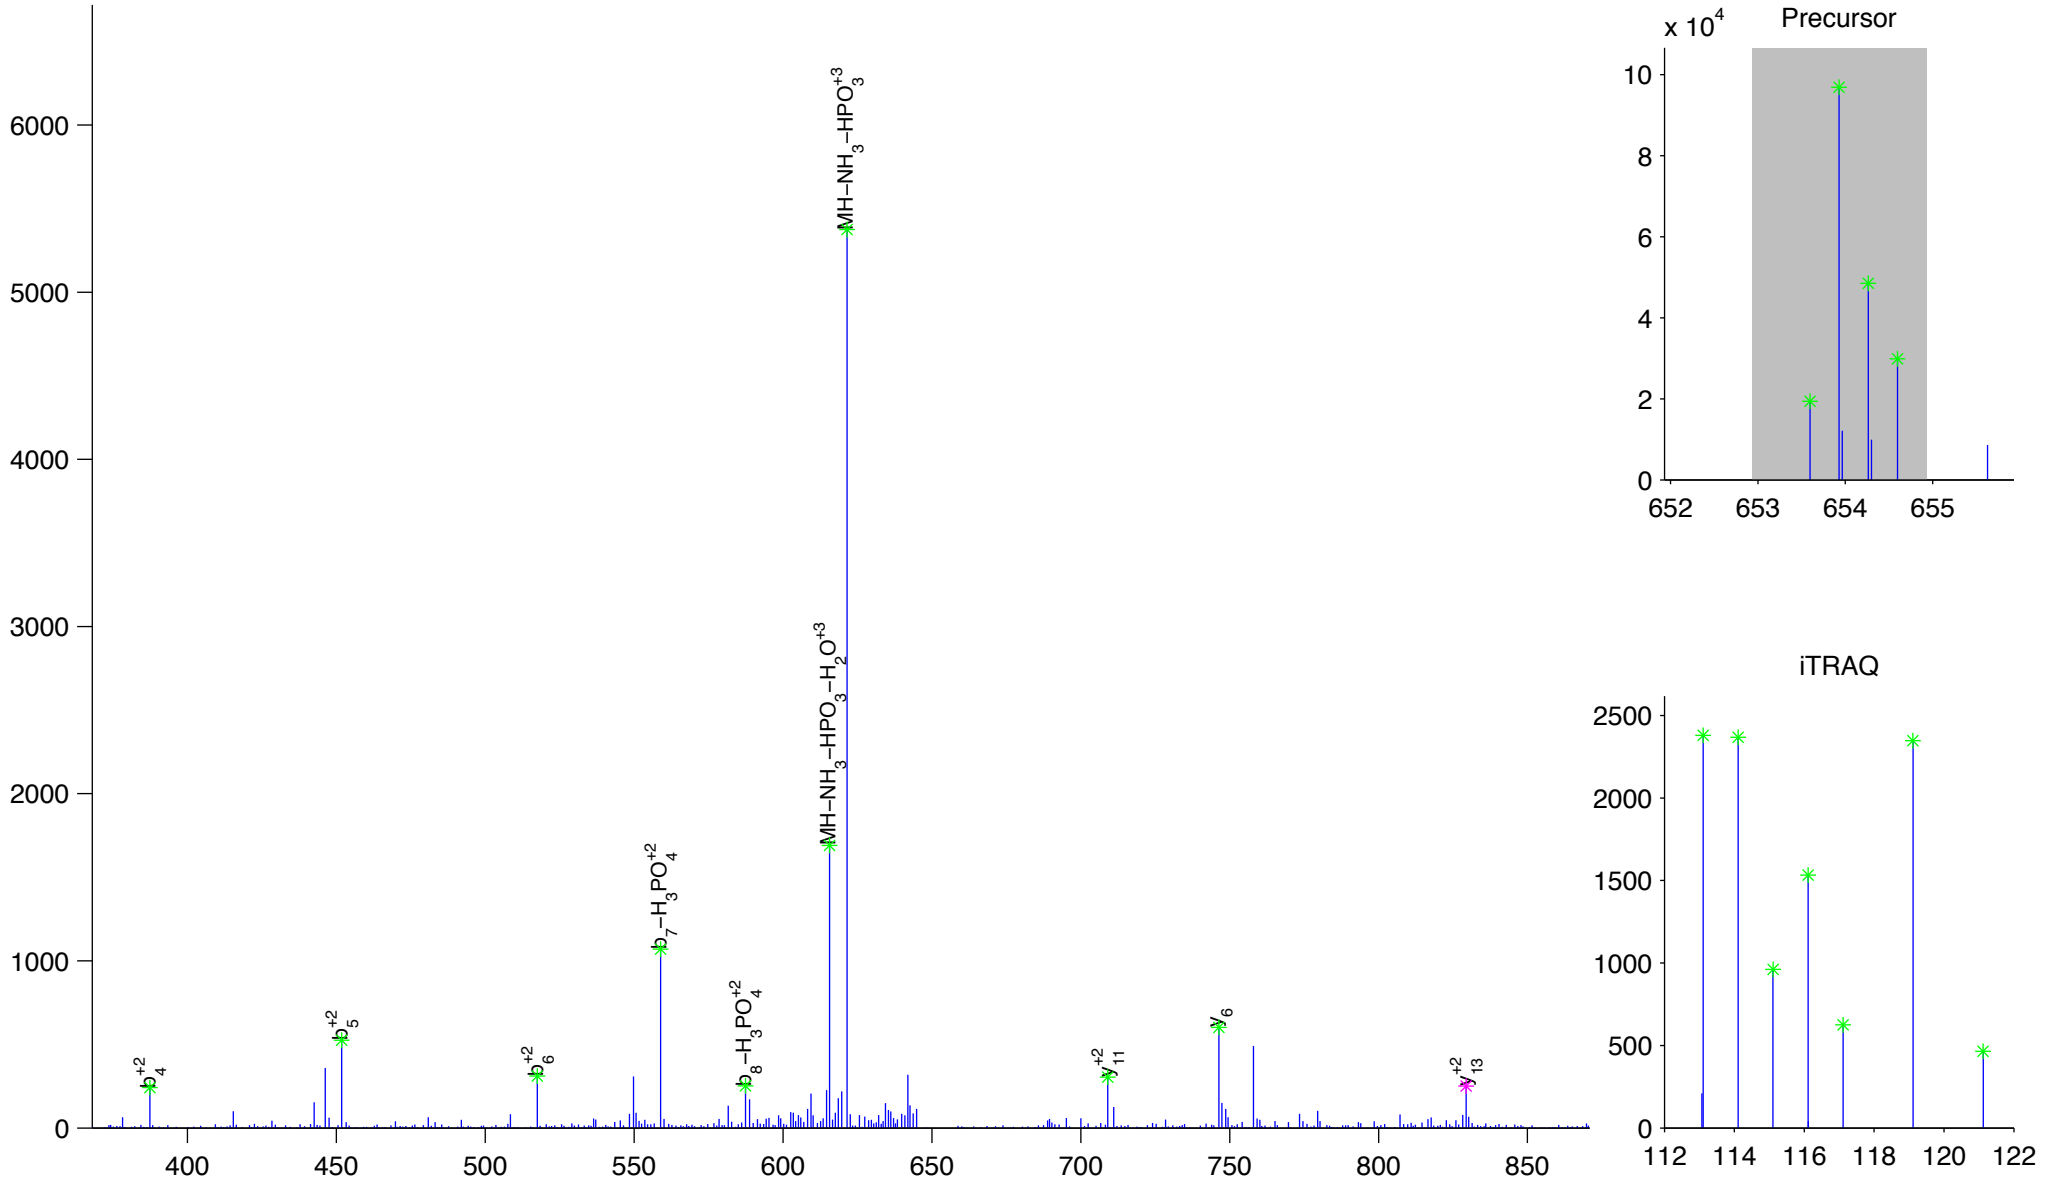



H [ T ] [ D ] [ D ] [ E ] [ M ] [ T ] [ G ] y [ V ] [ A ] [ T ] R

mitogen-activated protein kinase 14 isoform 1 [Homo sapiens]

Charge State: +3

Scan Number: 4077

File Name: HJ050711\_GBMxeno\_bio1\_E\_HANNAH.raw

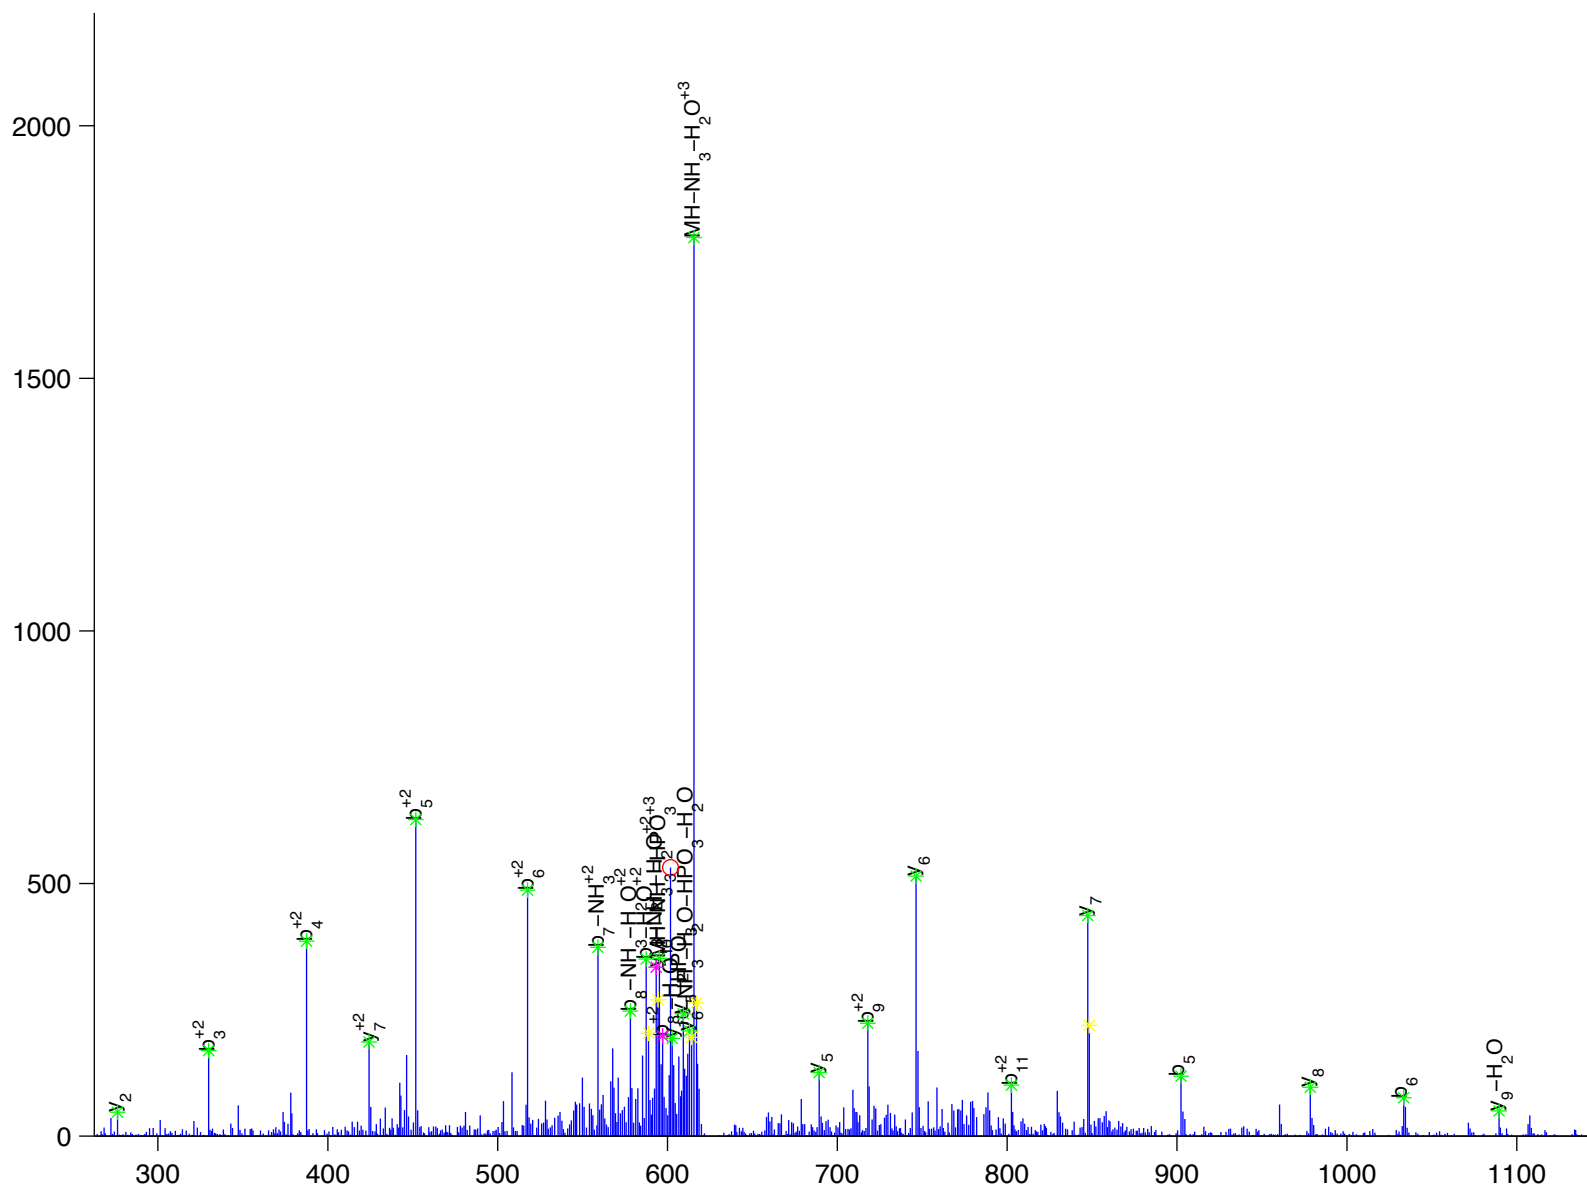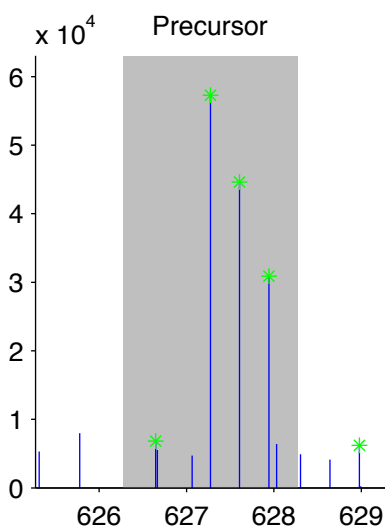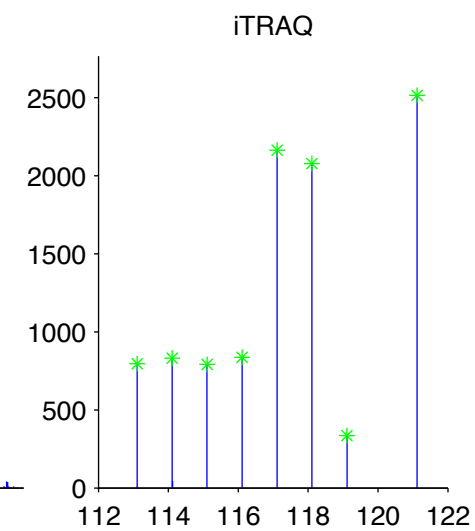

H [ T ] [ D ] [ D ] [ E ] [ M ] t [ G ] y [ V ] A [ T ] R

mitogen-activated protein kinase 14 isoform 1 [Homo sapiens]

Charge State: +3

Scan Number: 4207

File Name: HJ050711\_GBMxeno\_bio1\_E\_HANNAH.raw

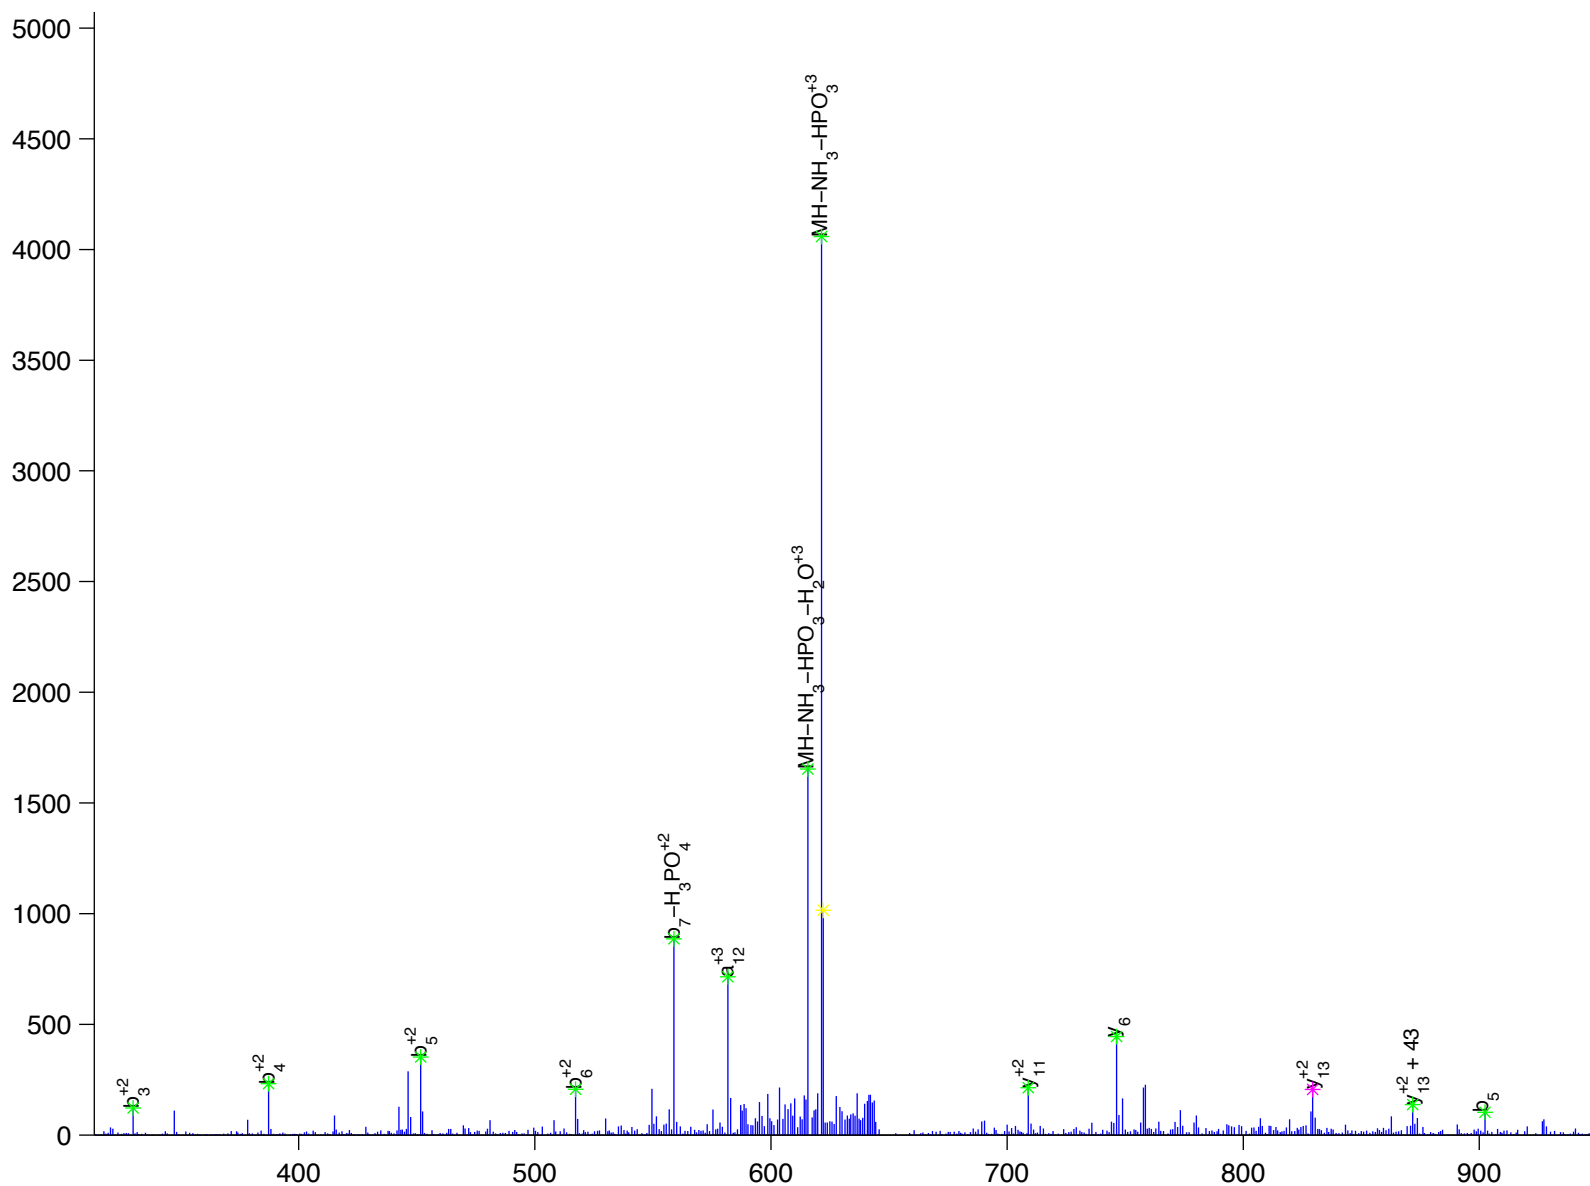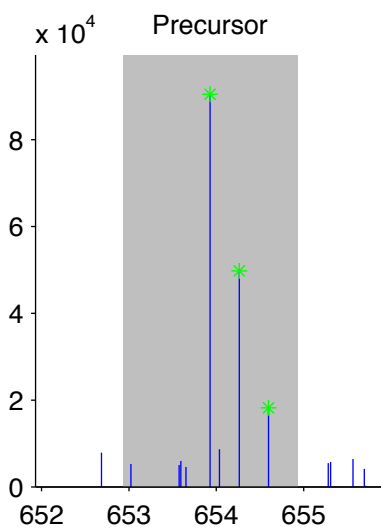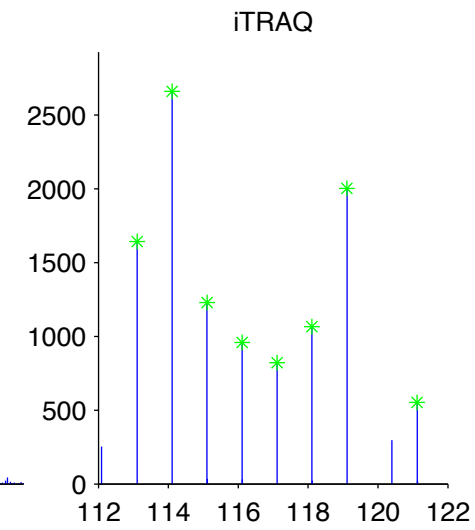

H [ T ] [ D ] [ D ] [ E ] [ M ] [ T ] [ G ] y [ V ] [ A ] [ T ] R

mitogen-activated protein kinase 14 isoform 1 [Homo sapiens]

Charge State: +3

Scan Number: 4249

File Name: HJ050711\_GBMxeno\_bio1\_E\_HANNAH.raw

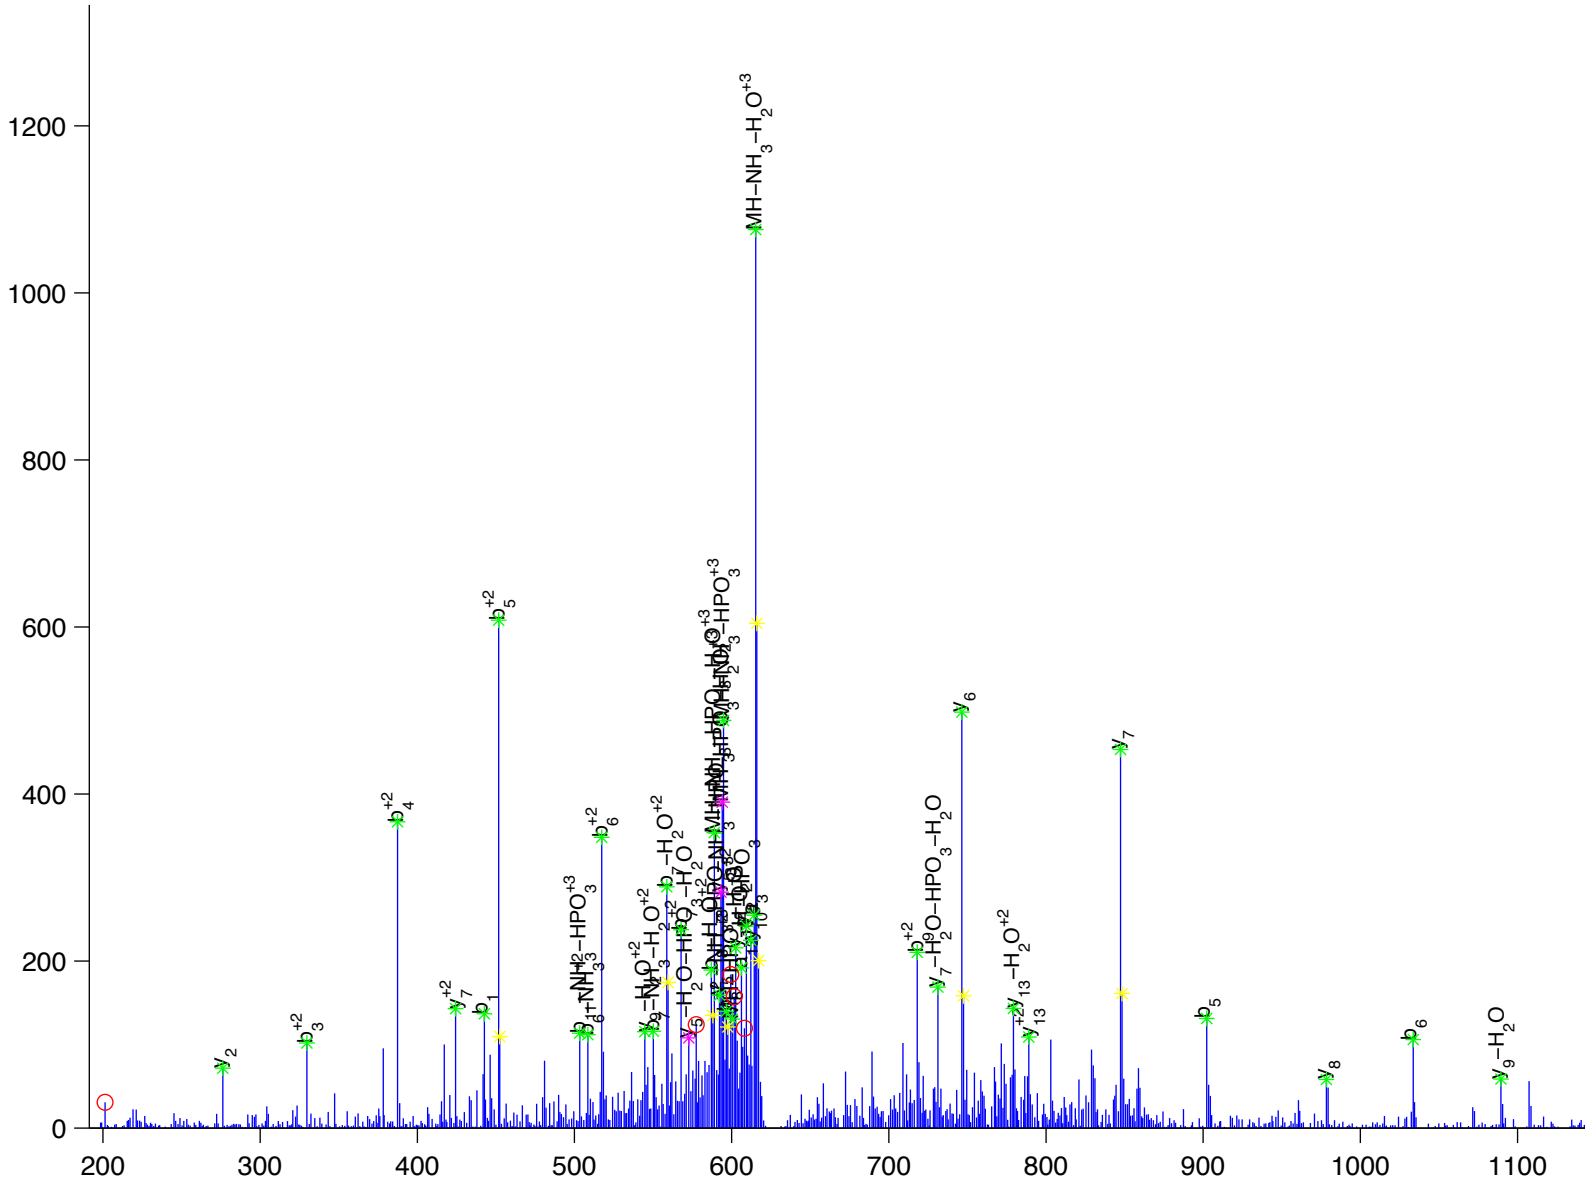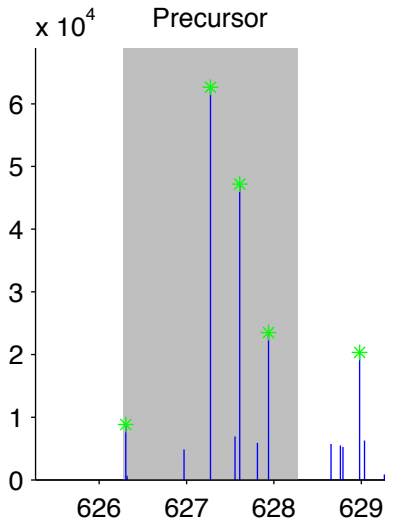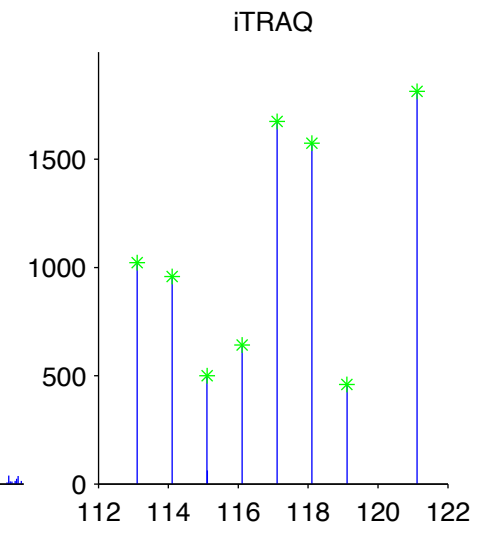

I [A] [D] [P] [E] [H] [D] [H] [T] [G] [F] [L] [T] [E] y [V] [A] [T] R

mitogen-activated protein kinase 3 isoform 2 [Homo sapiens]

Charge State: +4

Scan Number: 6576

File Name: HJ050711\_GBMxeno\_bio1\_E\_HANNAH.raw

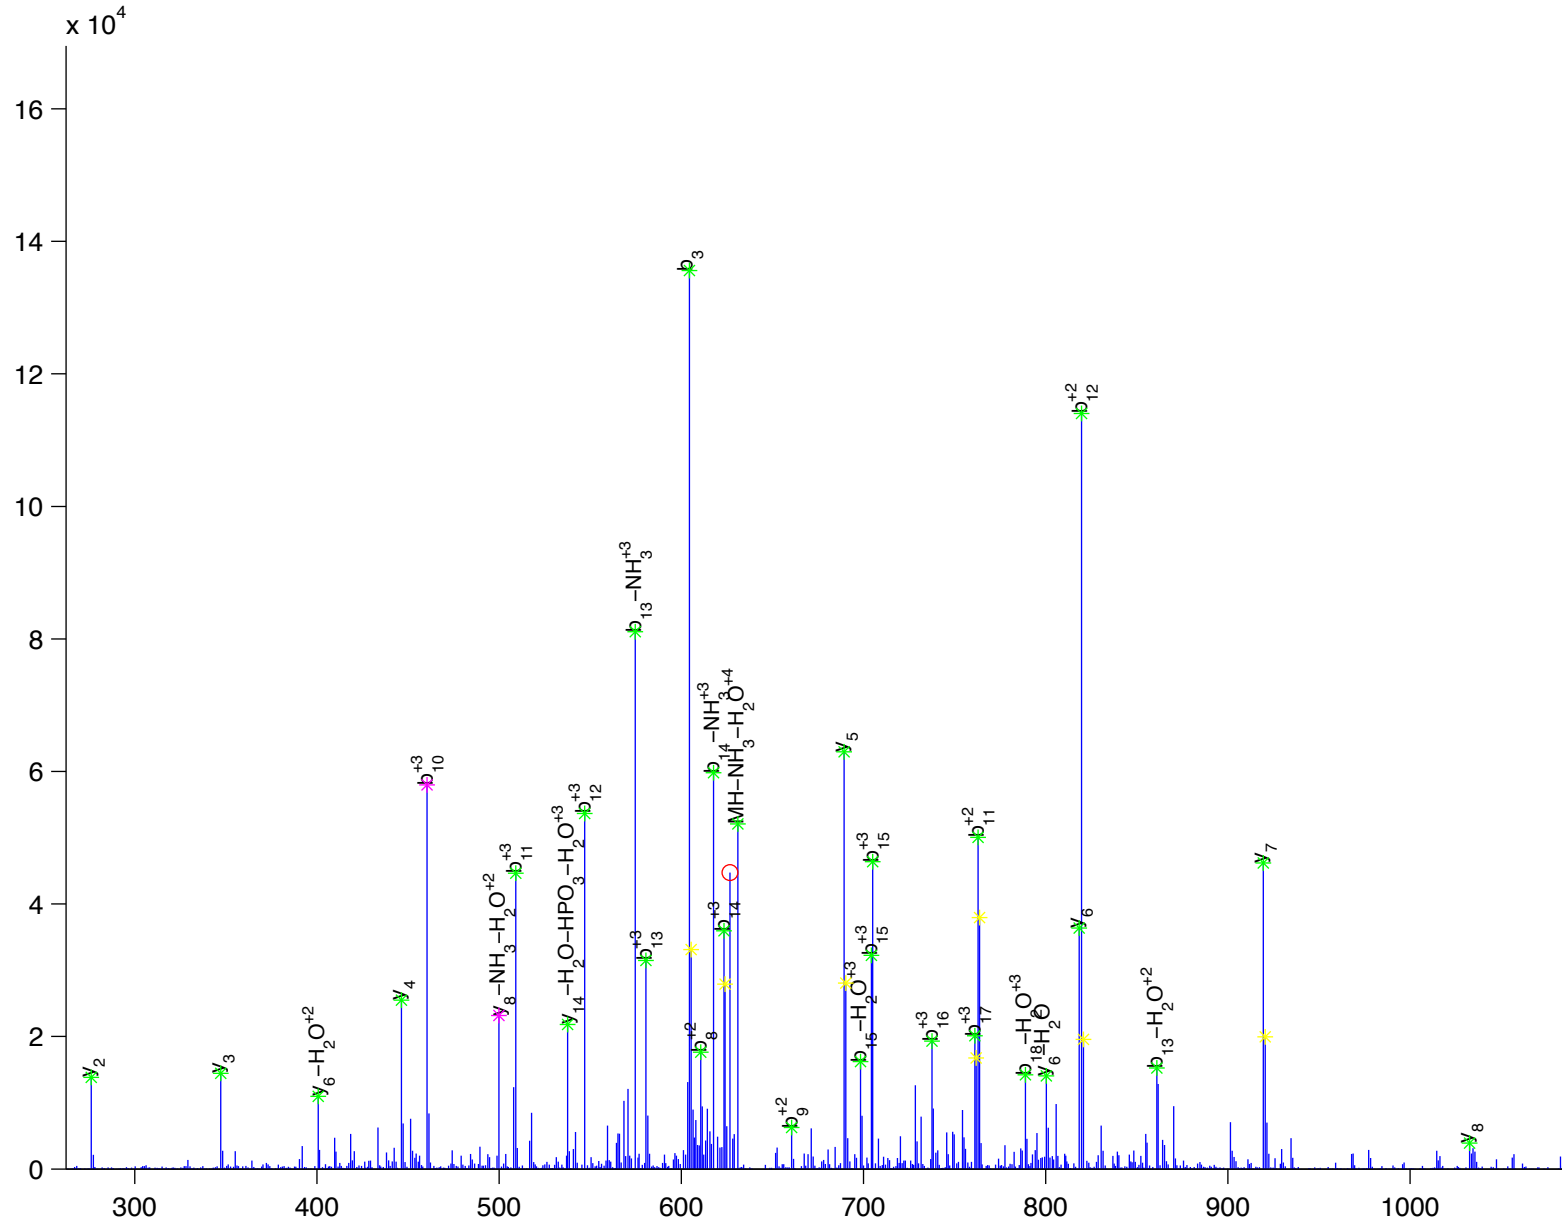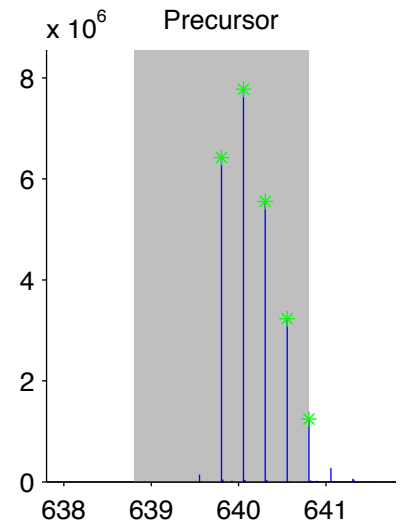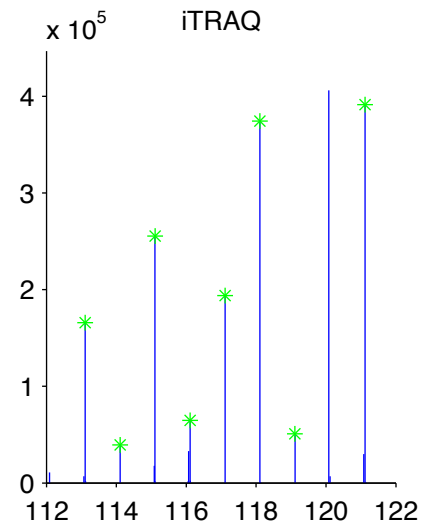

I [A] [D] [P] [E] [H] [D] [H] [T] [G] [F] [L] [T] [E] y [V] [A] [T] [R]

mitogen-activated protein kinase 3 isoform 2 [Homo sapiens]

Charge State: +3

Scan Number: 6578

File Name: HJ050711\_GBMxeno\_bio1\_E\_HANNAH.raw

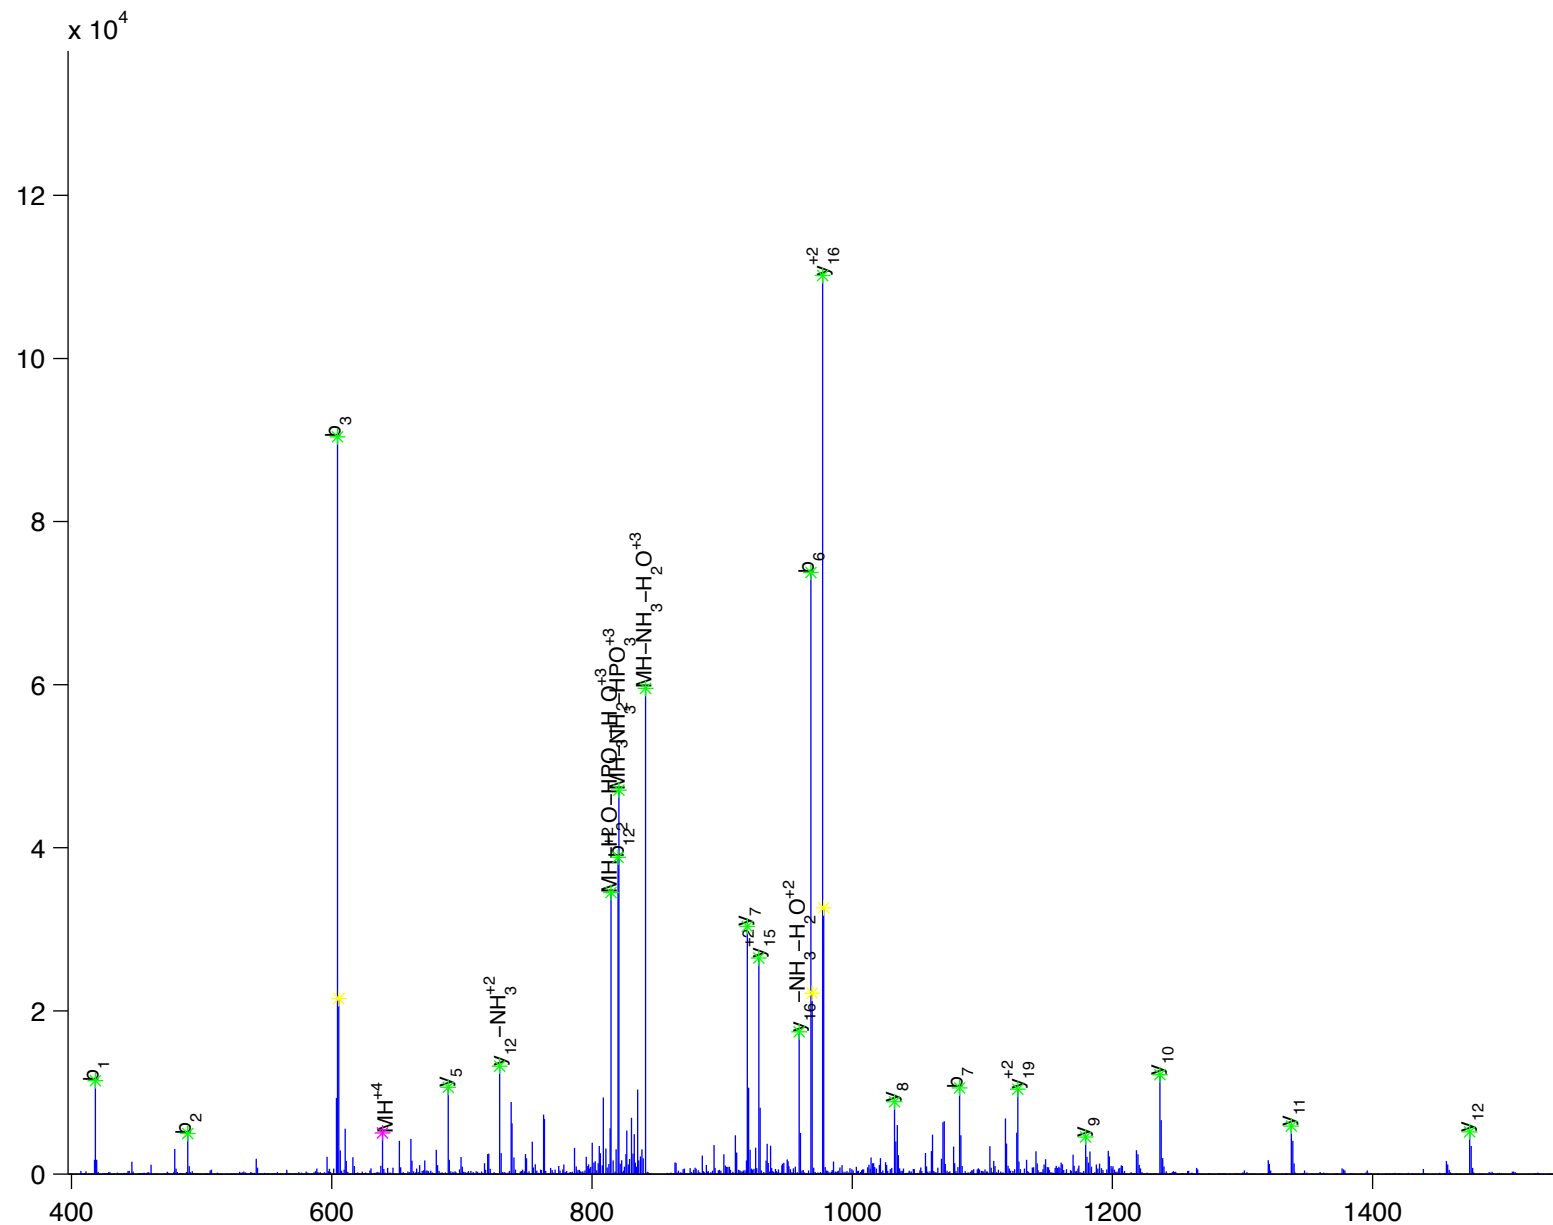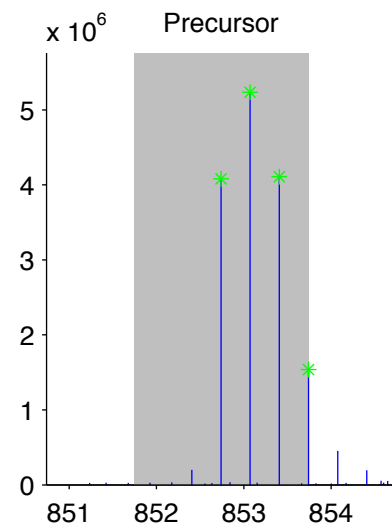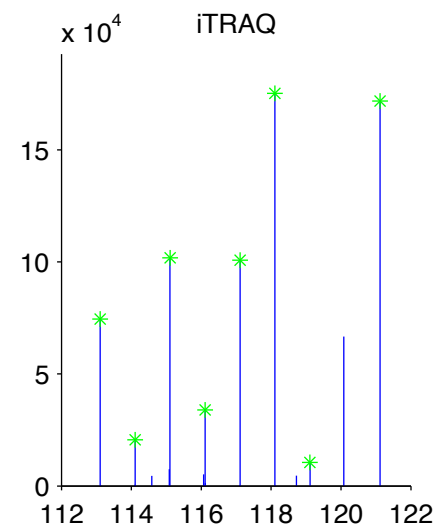

I [A] [D] [P] [E] [H] [D] [H] [T] [G] [F] [L] [T] [E] y [V] [A] [T] [R]

mitogen-activated protein kinase 3 isoform 2 [Homo sapiens]

Charge State: +3

Scan Number: 6605

File Name: HJ050711\_GBMxeno\_bio1\_E\_HANNAH.raw

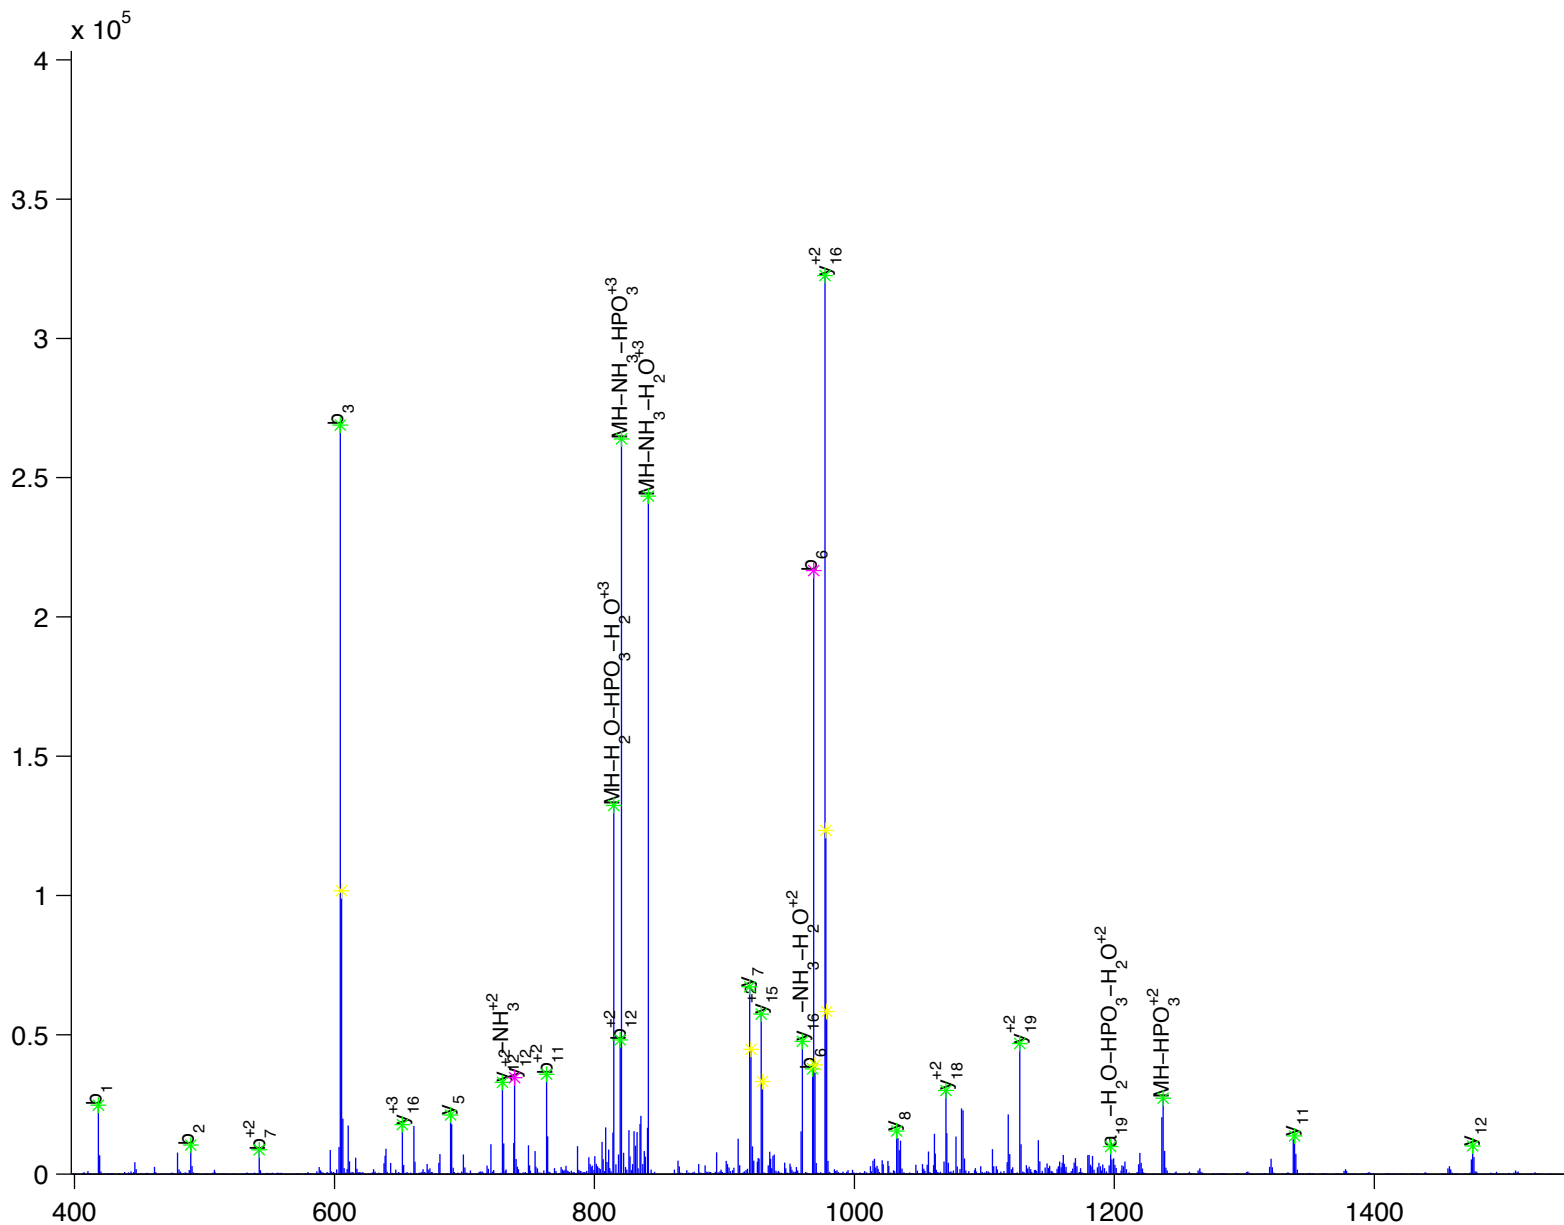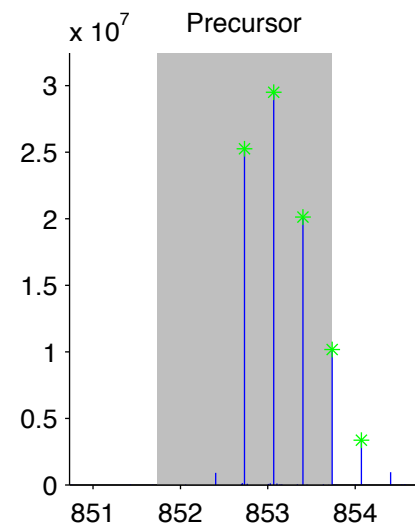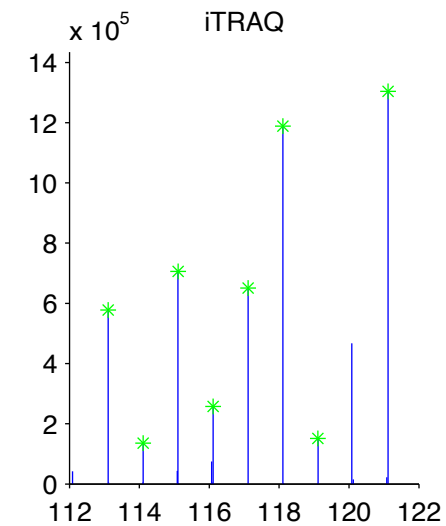



S [ E ] [ S ] [ V ] [ V ] y [ A ] [ D ] [ I ] R

myelin protein zero-like 1 isoform a [Homo sapiens]

Charge State: +2

Scan Number: 6116

File Name: HJ050711\_GBMxeno\_bio1\_E\_HANNAH.raw

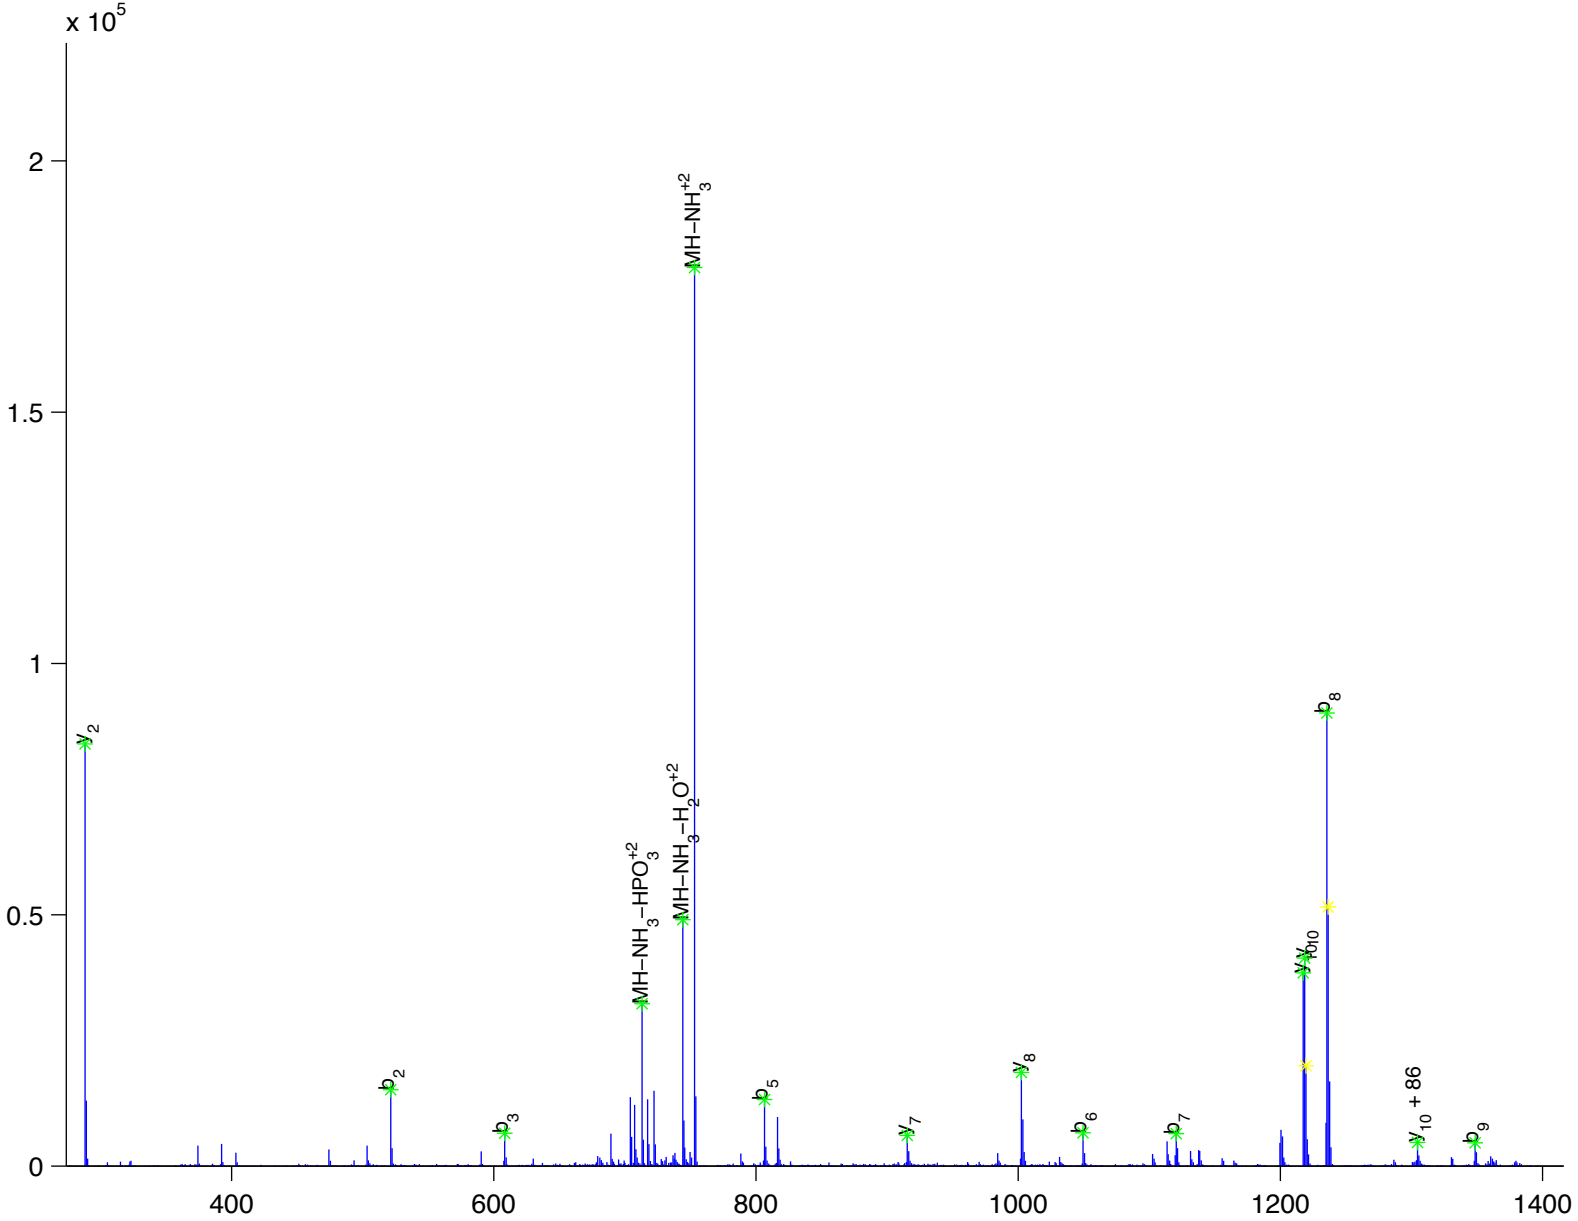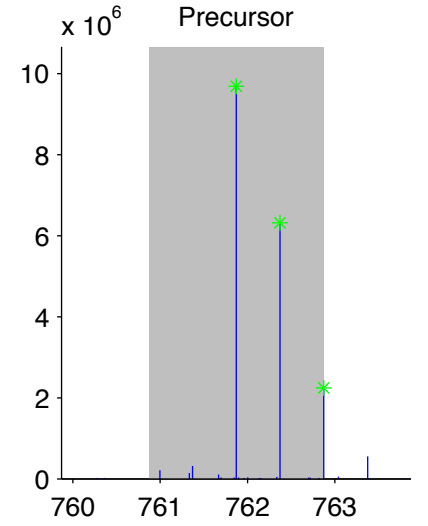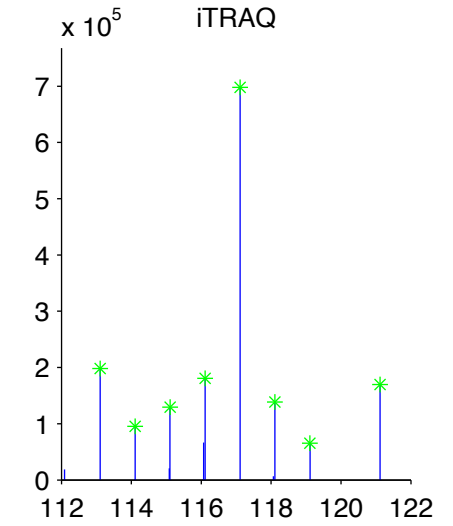



N [ L ] E [ E ] E [ E ] E [ N ] L [ G ] K [ G ] E [ y ] Q [ E ] S [ L ] R

nestin [Homo sapiens]

Charge State: +4

Scan Number: 5757

File Name: HJ050711\_GBMxeno\_bio1\_E\_HANNAH.raw

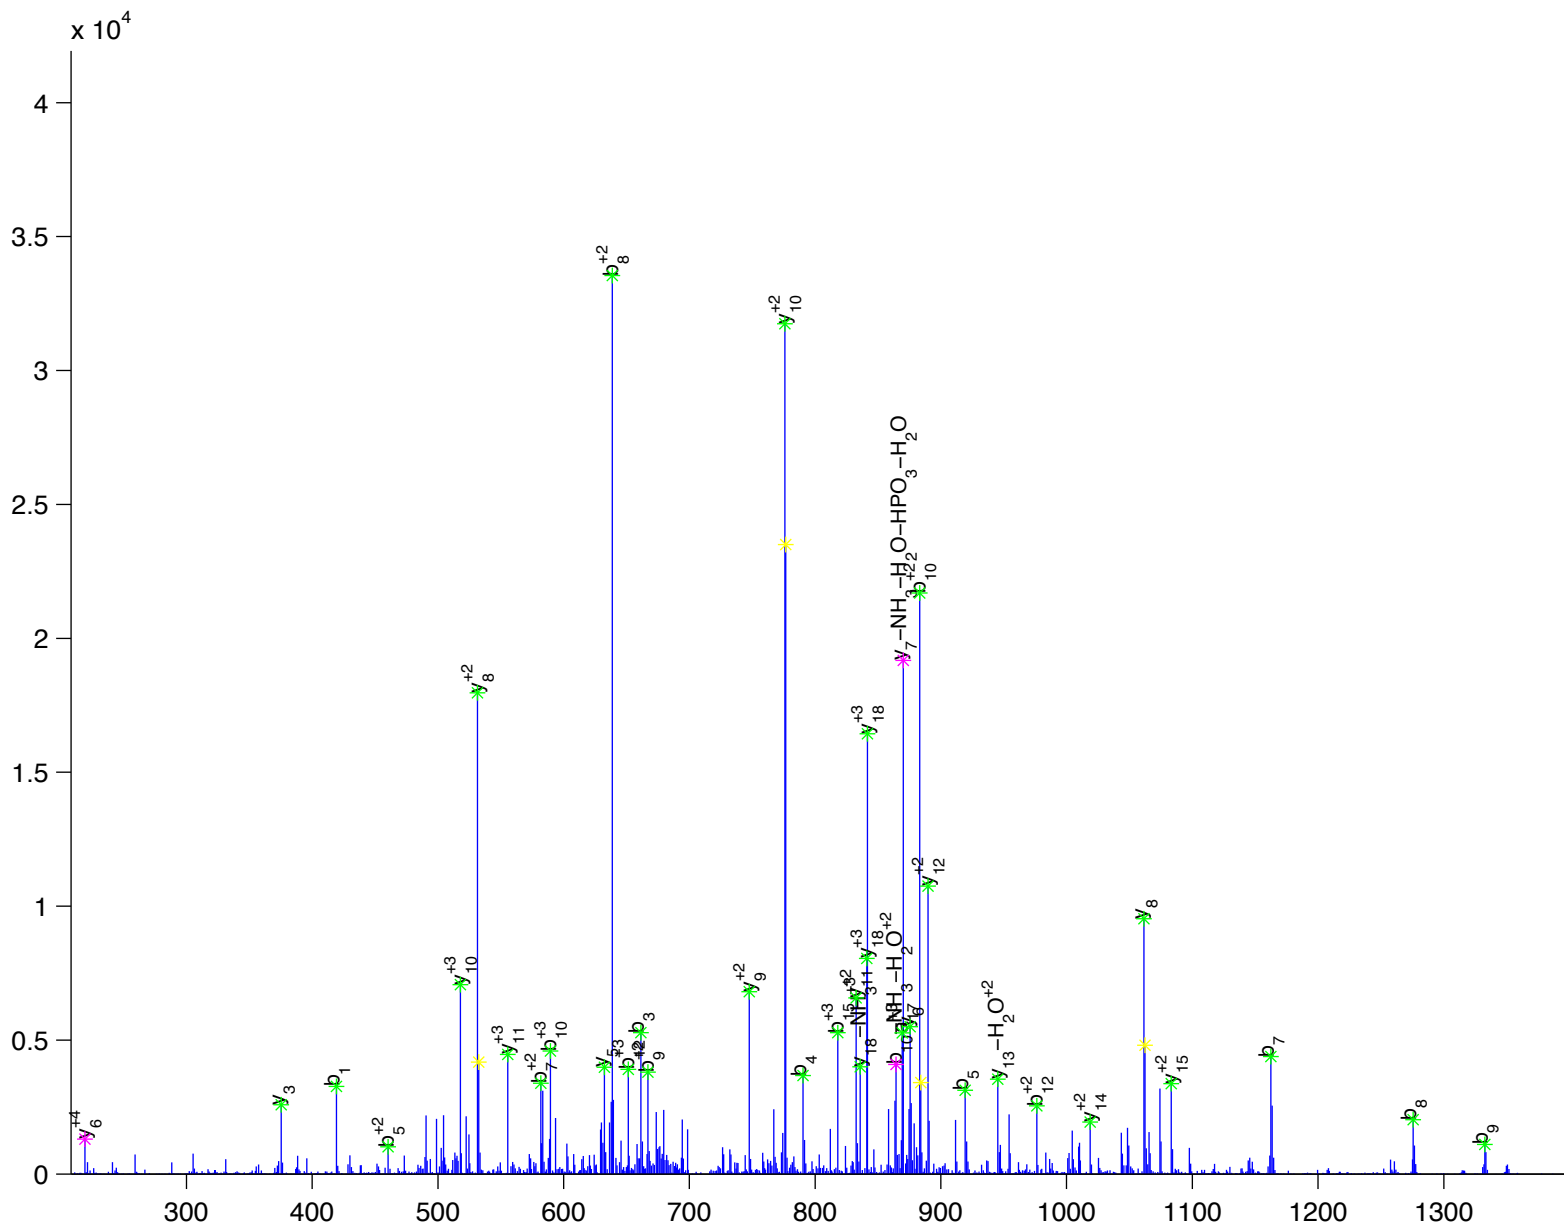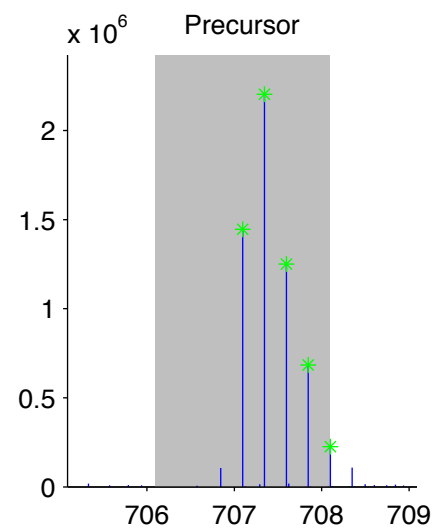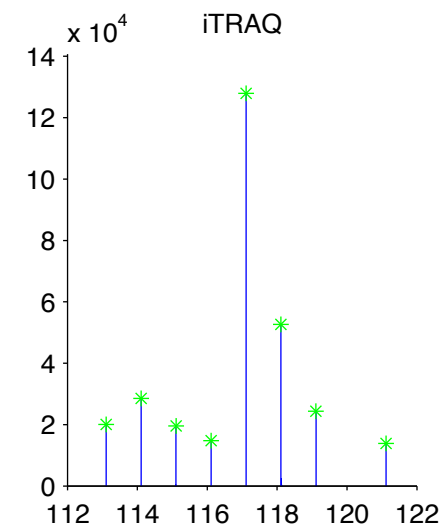

N [ L ] [ E ] [ E ] [ E ] [ E ] [ N ] [ L ] [ G ] [ K ] [ G ] [ E ] [ y ] [ Q ] [ E ] [ S ] [ L ] [ R ]

nestin [Homo sapiens]

Charge State: +3

Scan Number: 5759

File Name: HJ050711\_GBMxeno\_bio1\_E\_HANNAH.raw

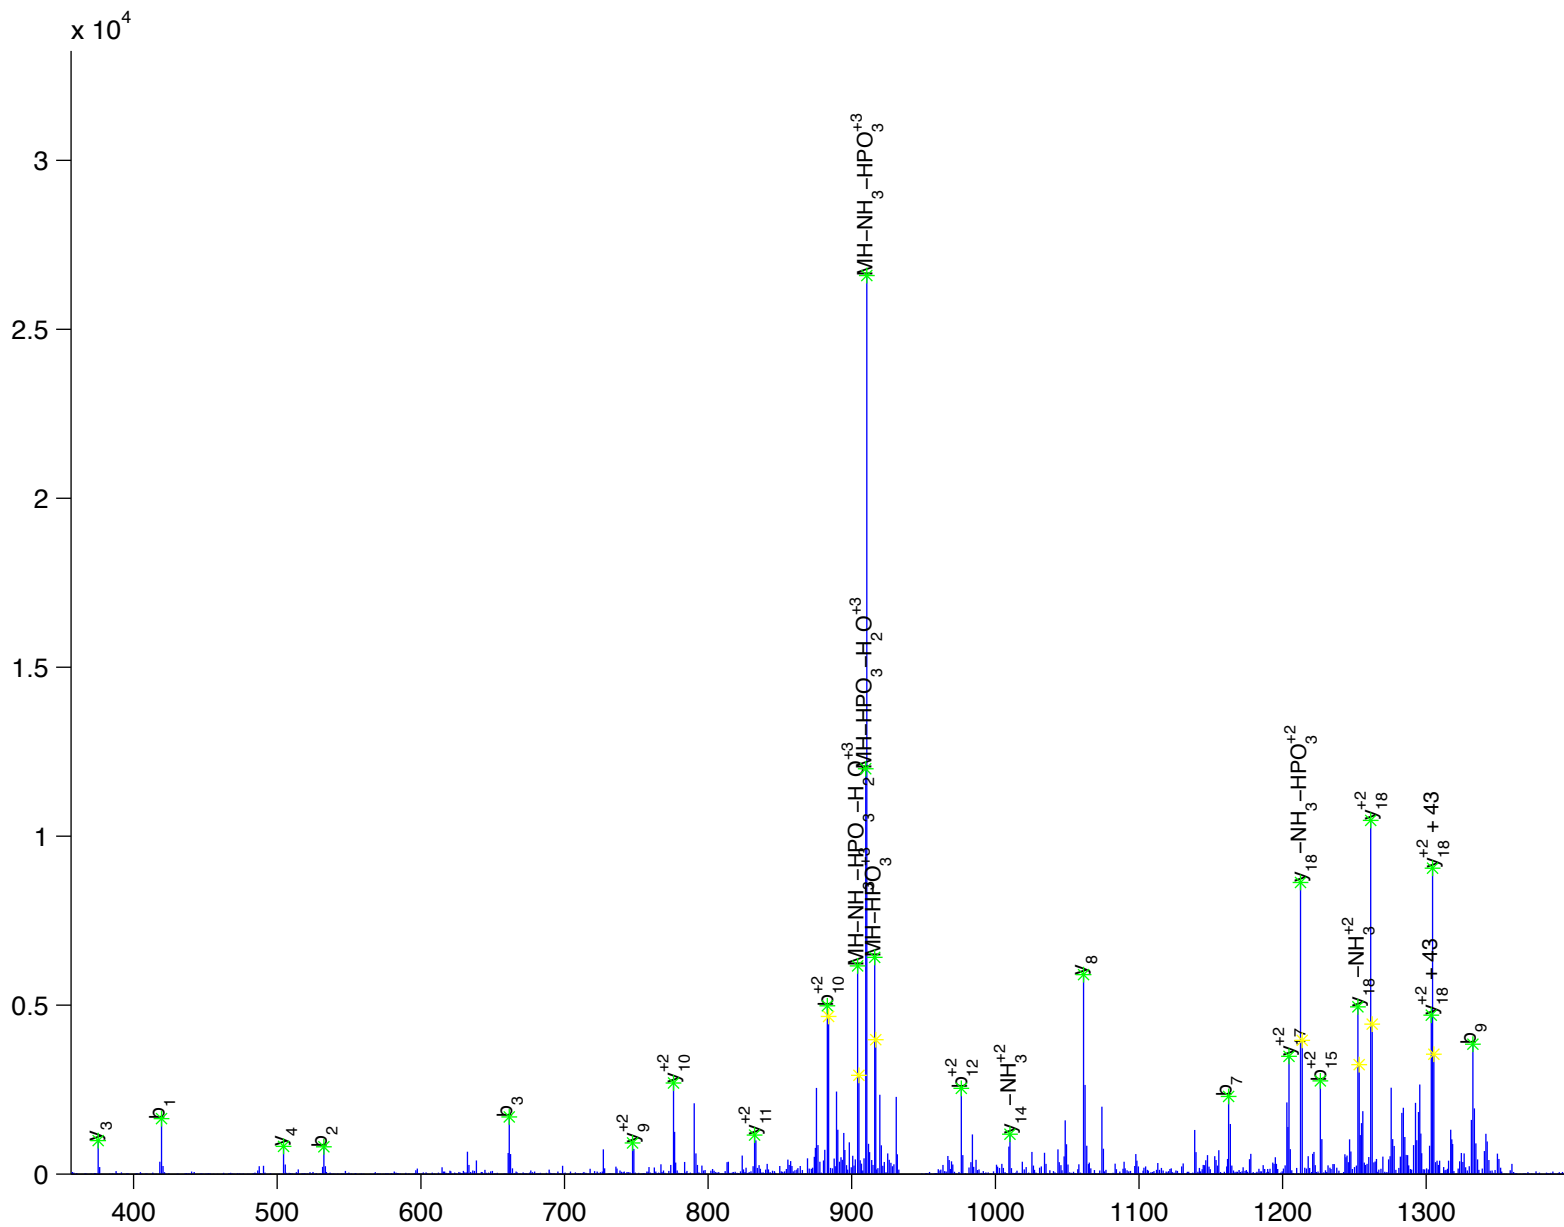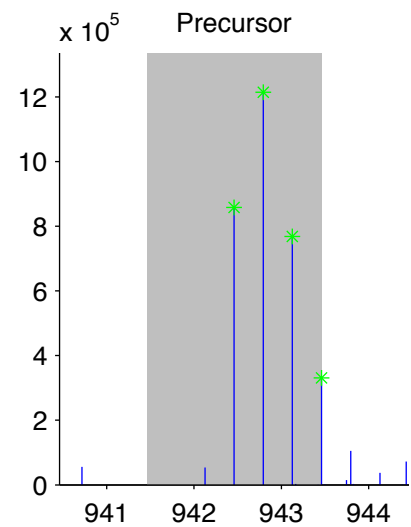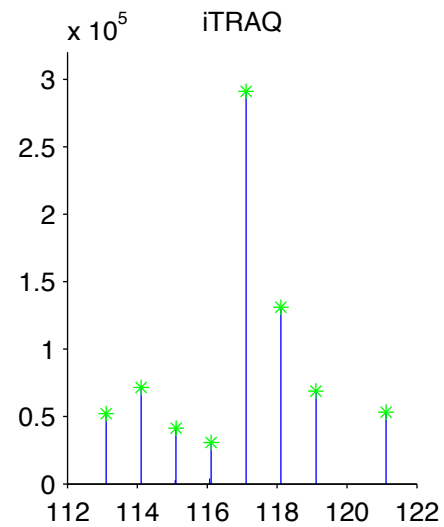

N [ L ] E [ E ] E [ E ] N [ L ] G [ K ] G [ E ] y [ Q ] E [ S ] L [ R ]

nestin [Homo sapiens]

Charge State: +3

Scan Number: 5775

File Name: HJ050711\_GBMxeno\_bio1\_E\_HANNAH.raw

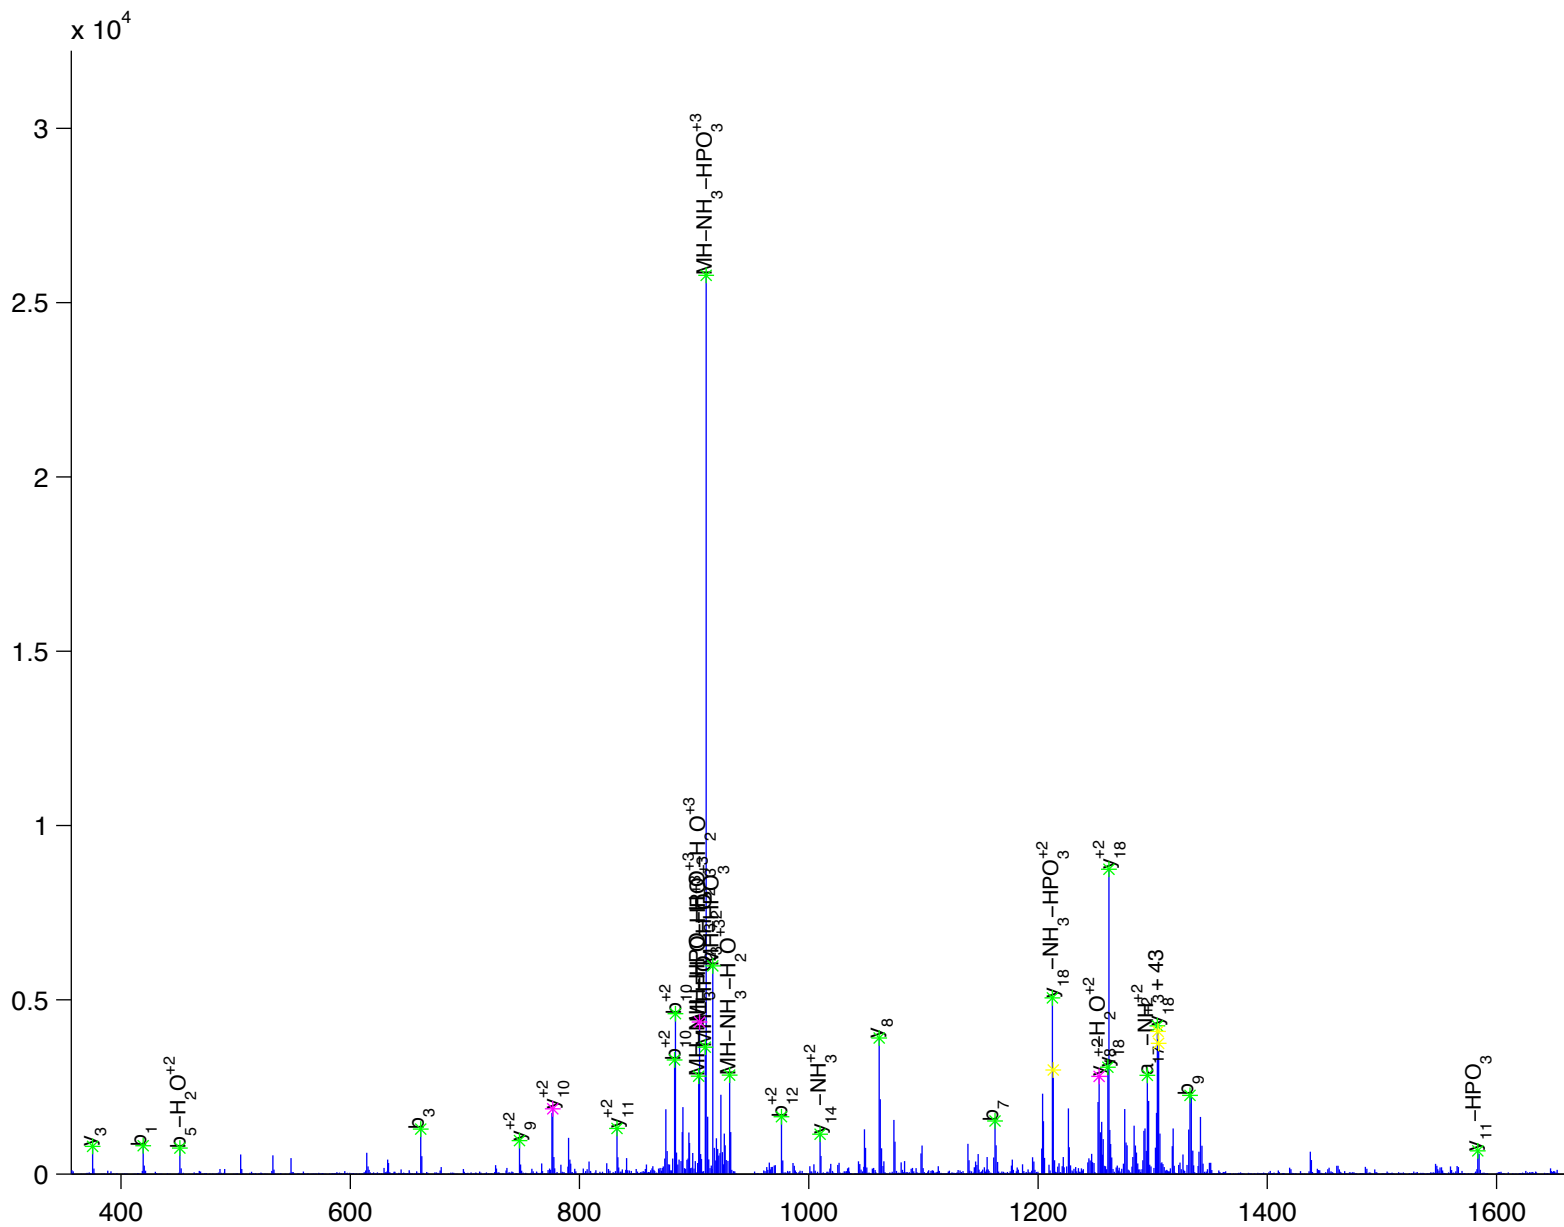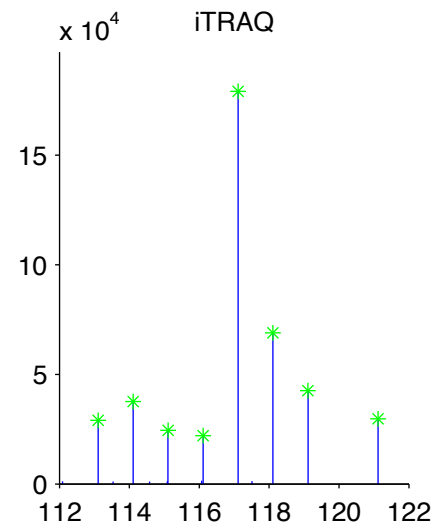

E[K]DyD[F]P[P]P[M]R

neural precursor cell expressed, developmentally down-regulated 9 isoform 1 [Homo sapiens]

Charge State: +3

Scan Number: 5988

File Name: HJ050711\_GBMxeno\_bio1\_E\_HANNAH.raw

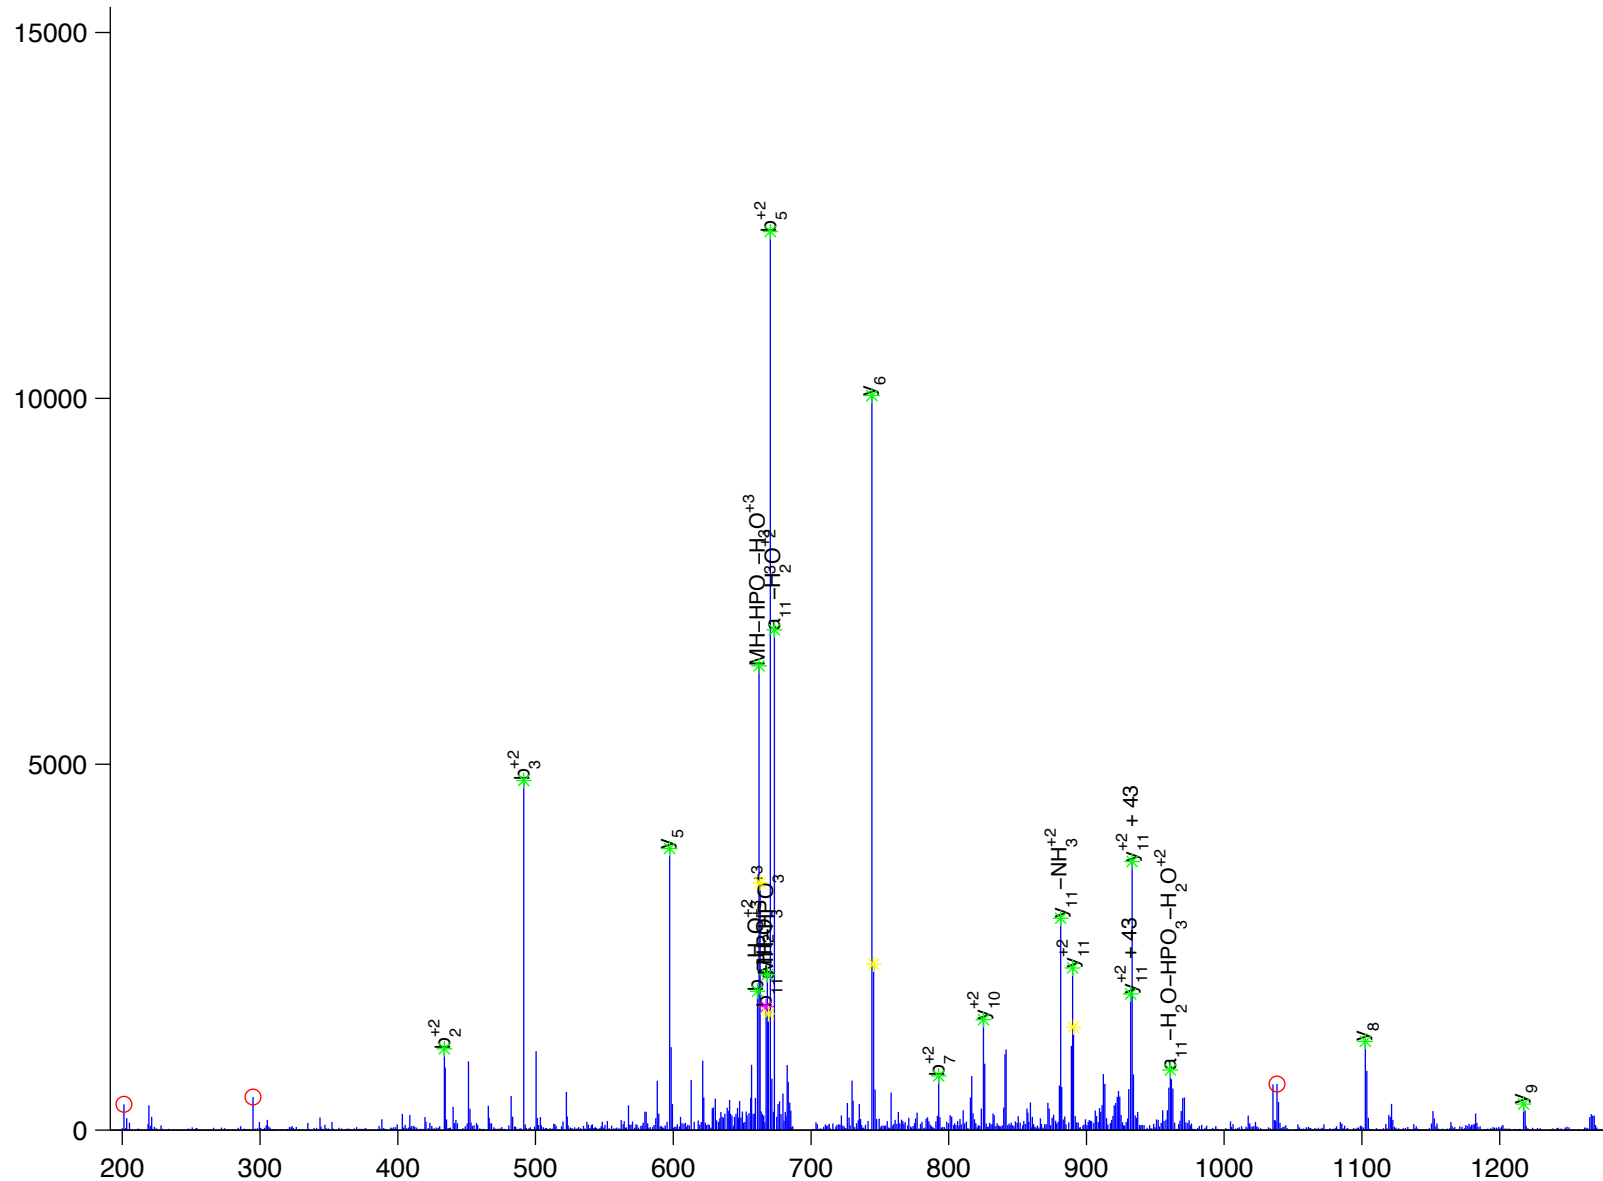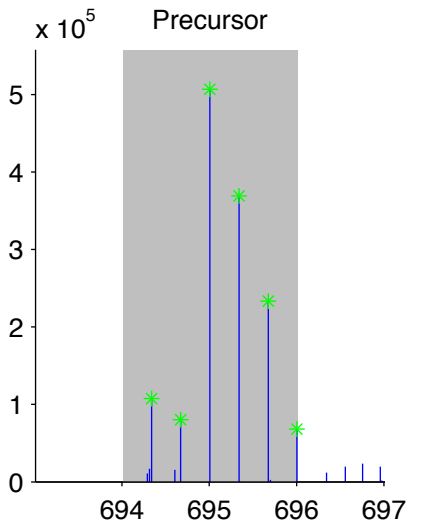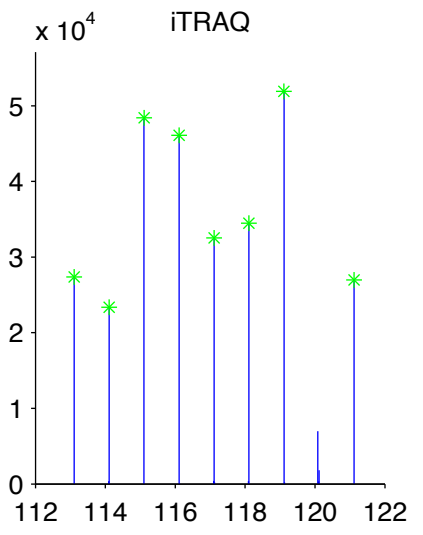

y [ L ] [ T ] [ A ] [ E ] [ E ] [ T ] [ D ] K

nuclear receptor coactivator 5 [Homo sapiens]

Charge State: +3

Scan Number: 5028

File Name: HJ050711\_GBMxeno\_bio1\_E\_HANNAH.raw

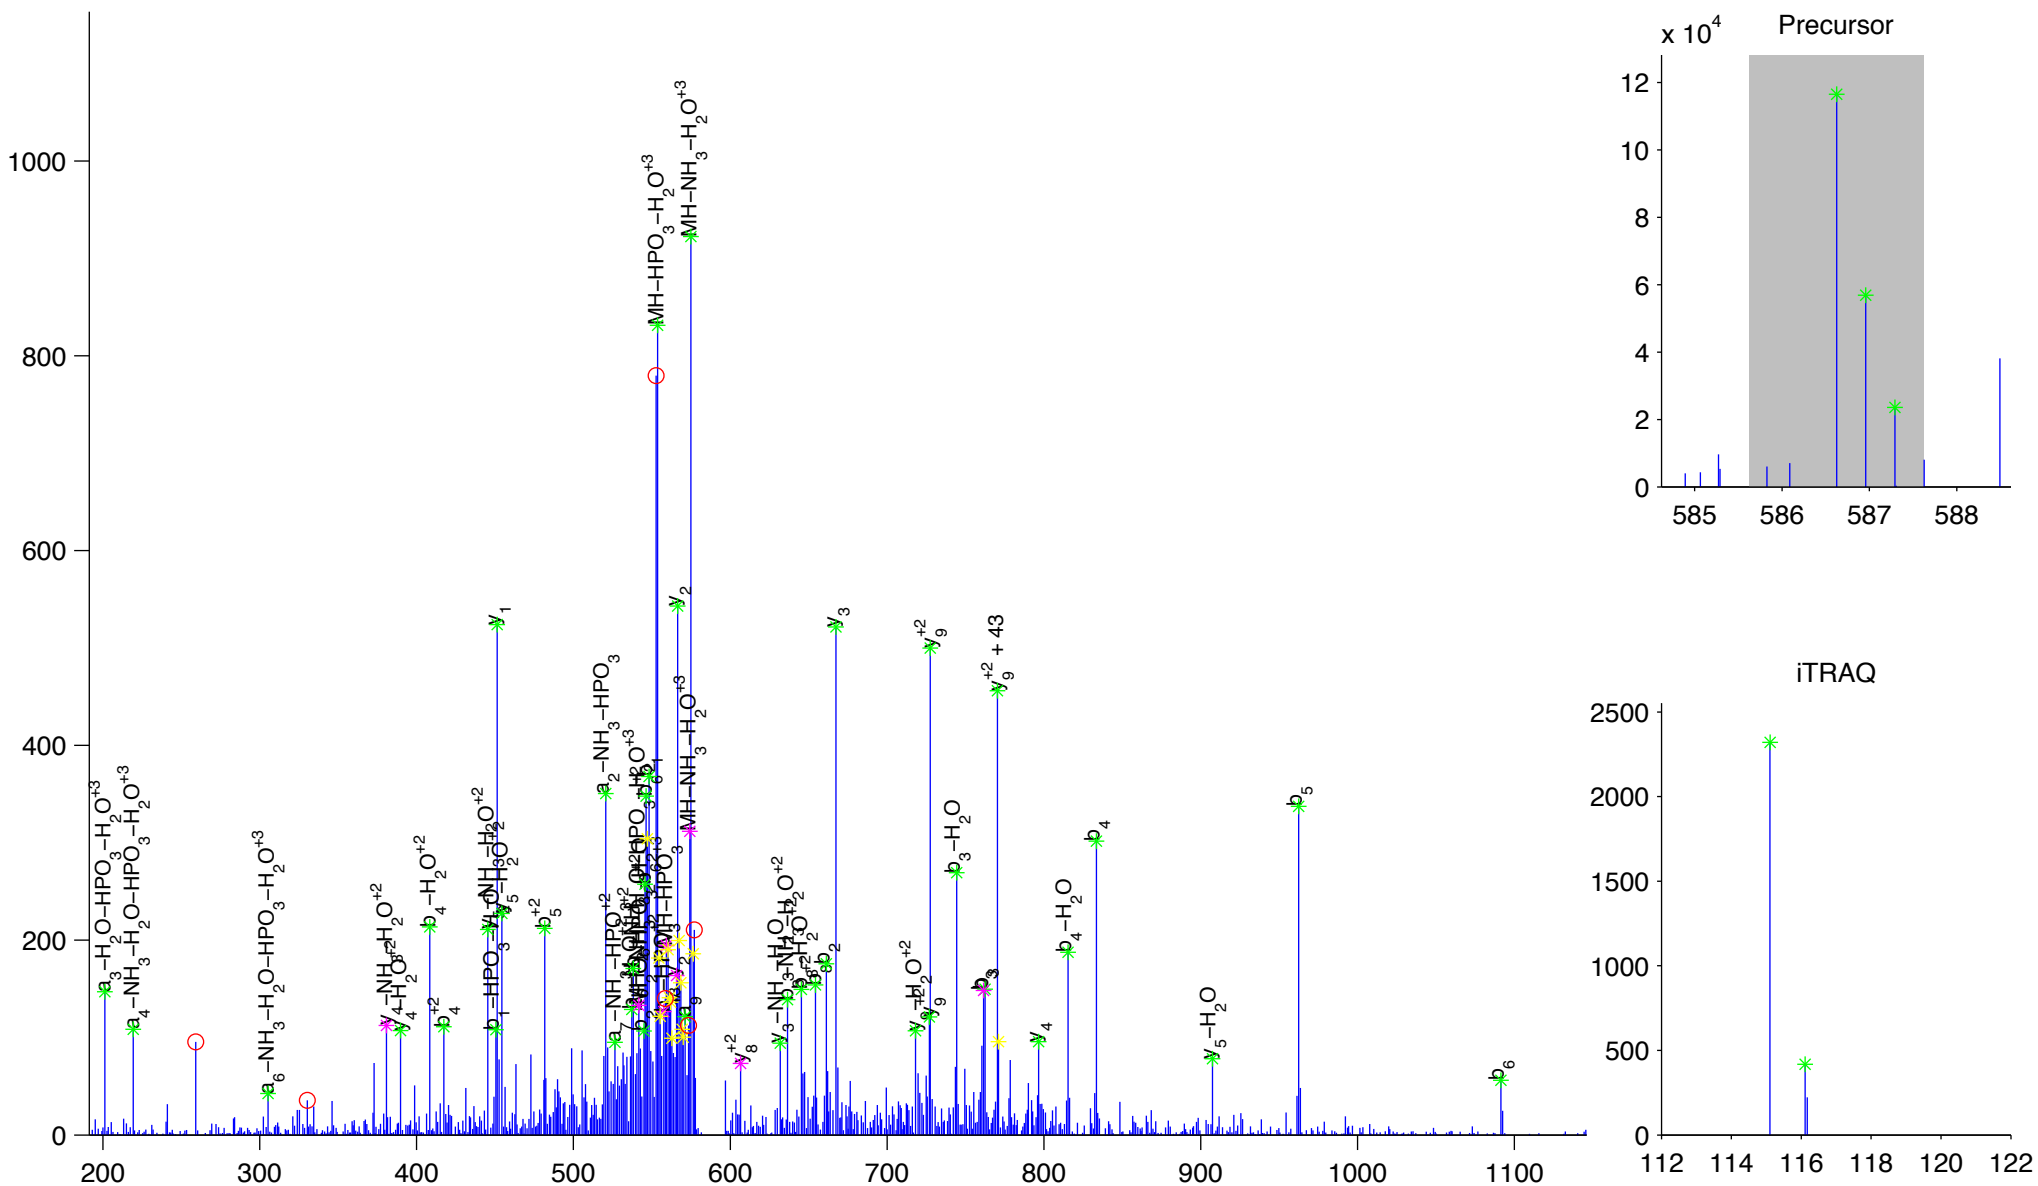

R[P]Q[y]S[N]P[P]V[Q]G[E]V[M]E[G]A[D]N[Q]G[A]G[E]Q[G]R[P]V[R]

nuclease sensitive element binding protein 1 [Homo sapiens]

Charge State: +4

Scan Number: 4431

File Name: HJ050711\_GBMxeno\_bio1\_E\_HANNAH.raw

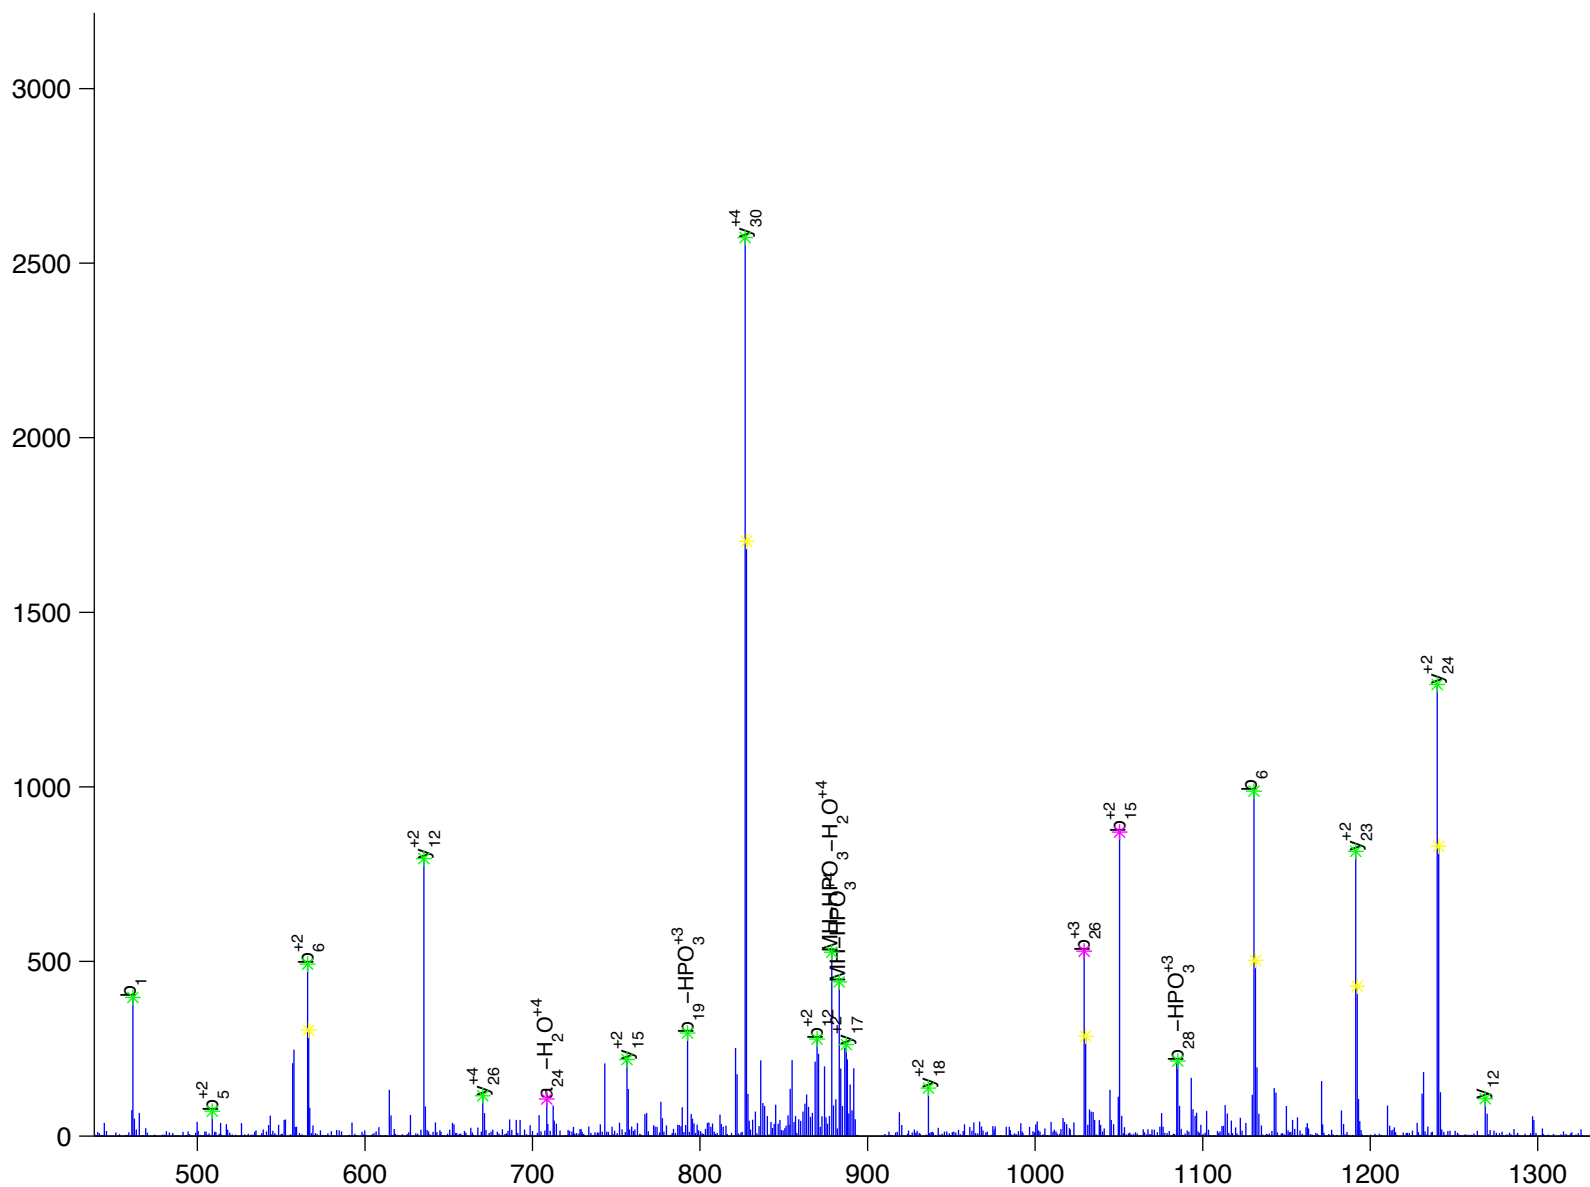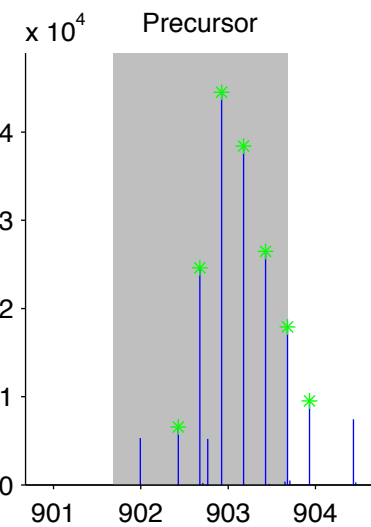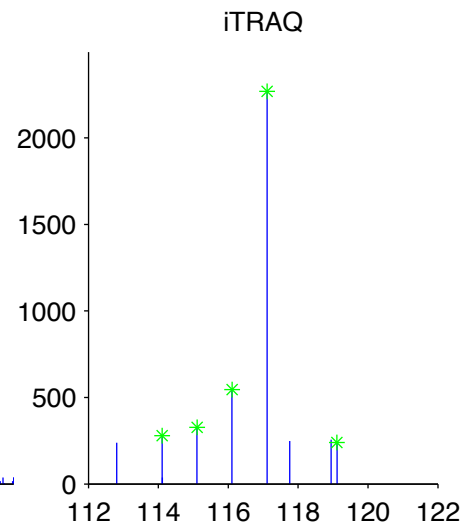

E R D y A E I Q D F H R

partitioning-defective protein 3 homolog [Homo sapiens]

Charge State: +3

Scan Number: 4335

File Name: HJ050711\_GBMxeno\_bio1\_E\_HANNAH.raw

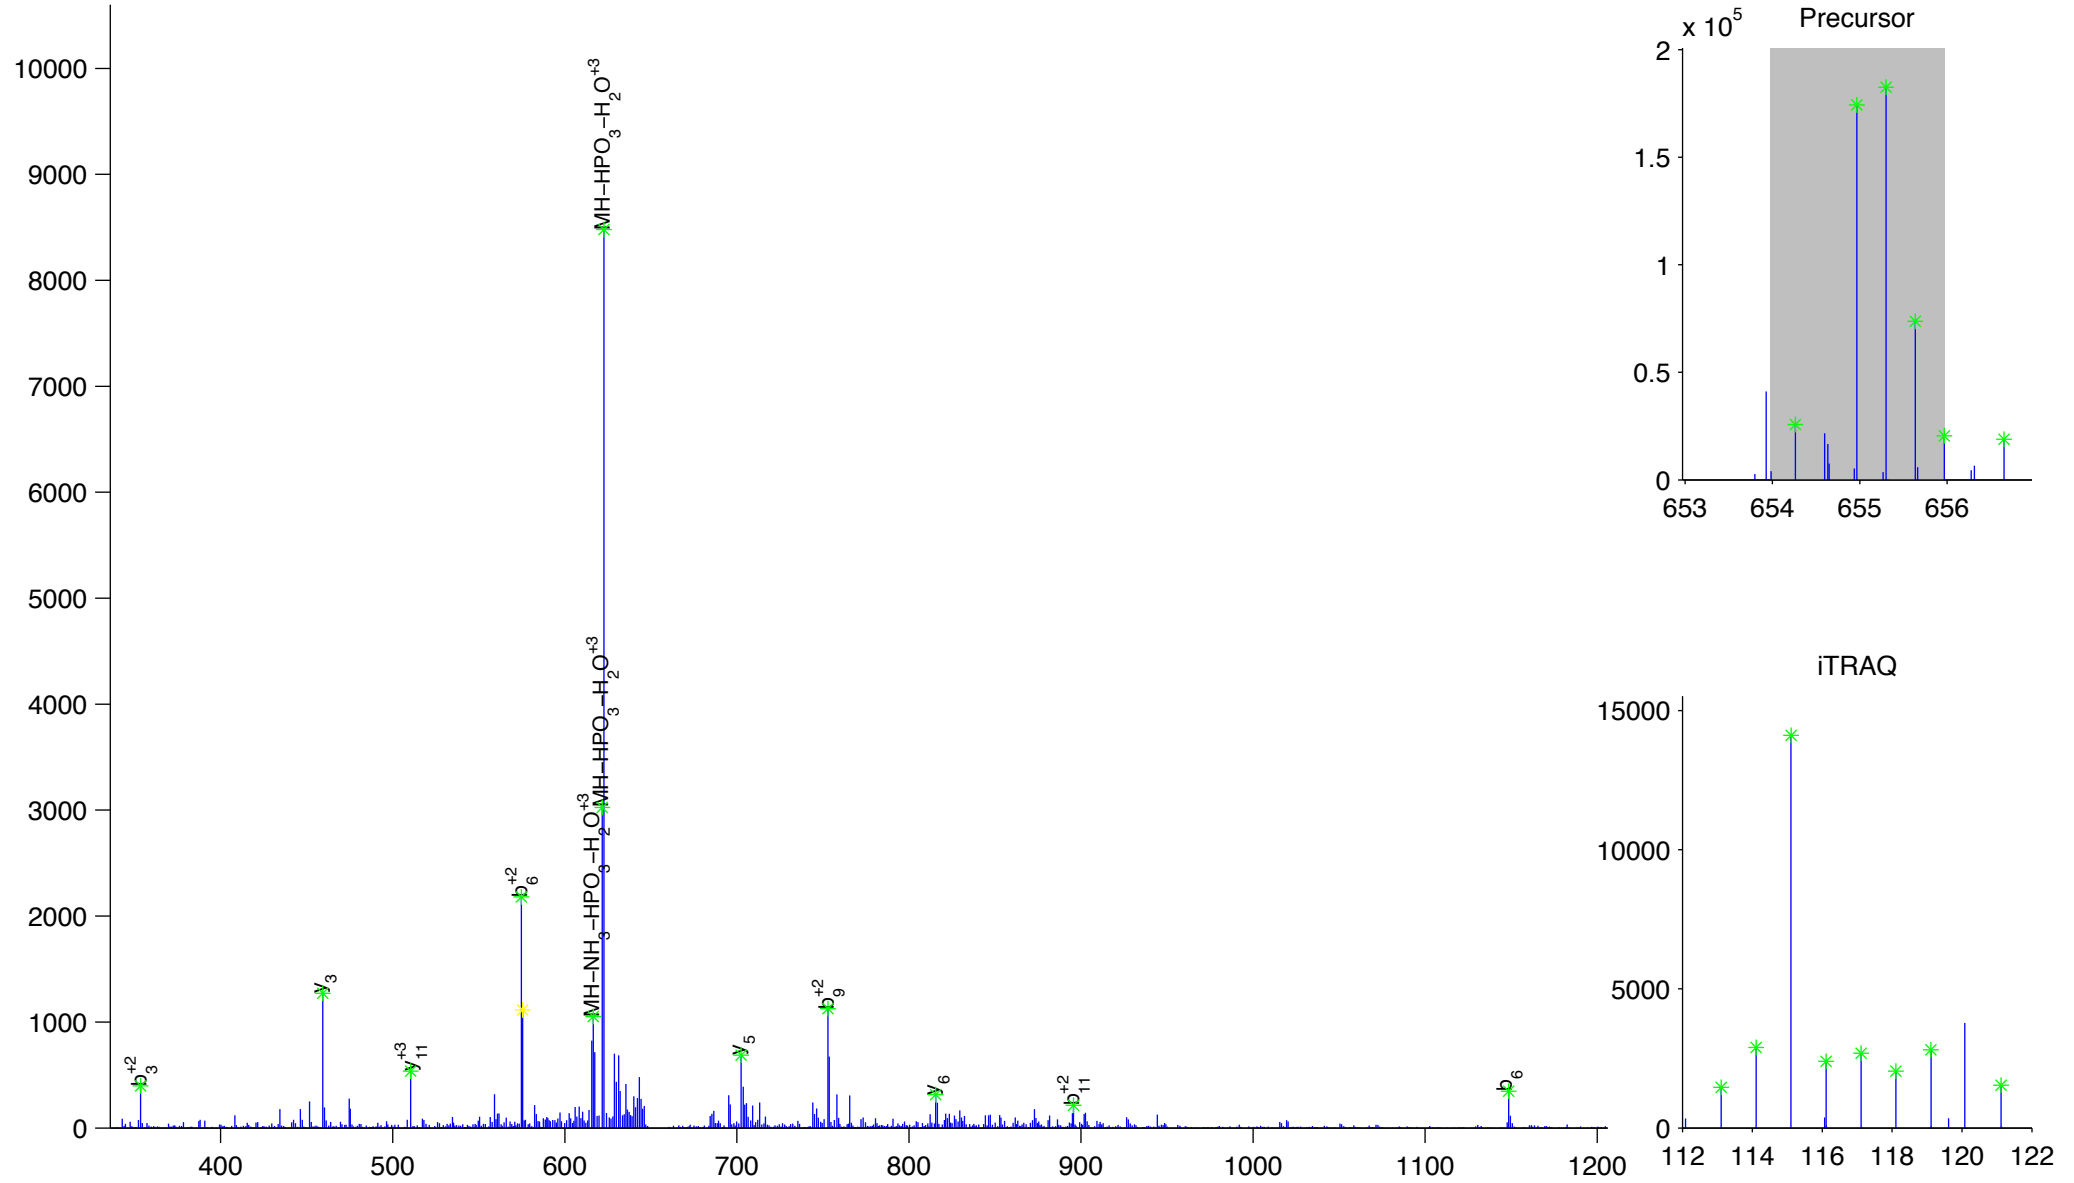

V [G] [E] [E] [E] [H] [V] [y] [S] [F] [P] [N] K

paxillin [Homo sapiens]

Charge State: +3

Scan Number: 5418

File Name: HJ050711\_GBMxeno\_bio1\_E\_HANNAH.raw

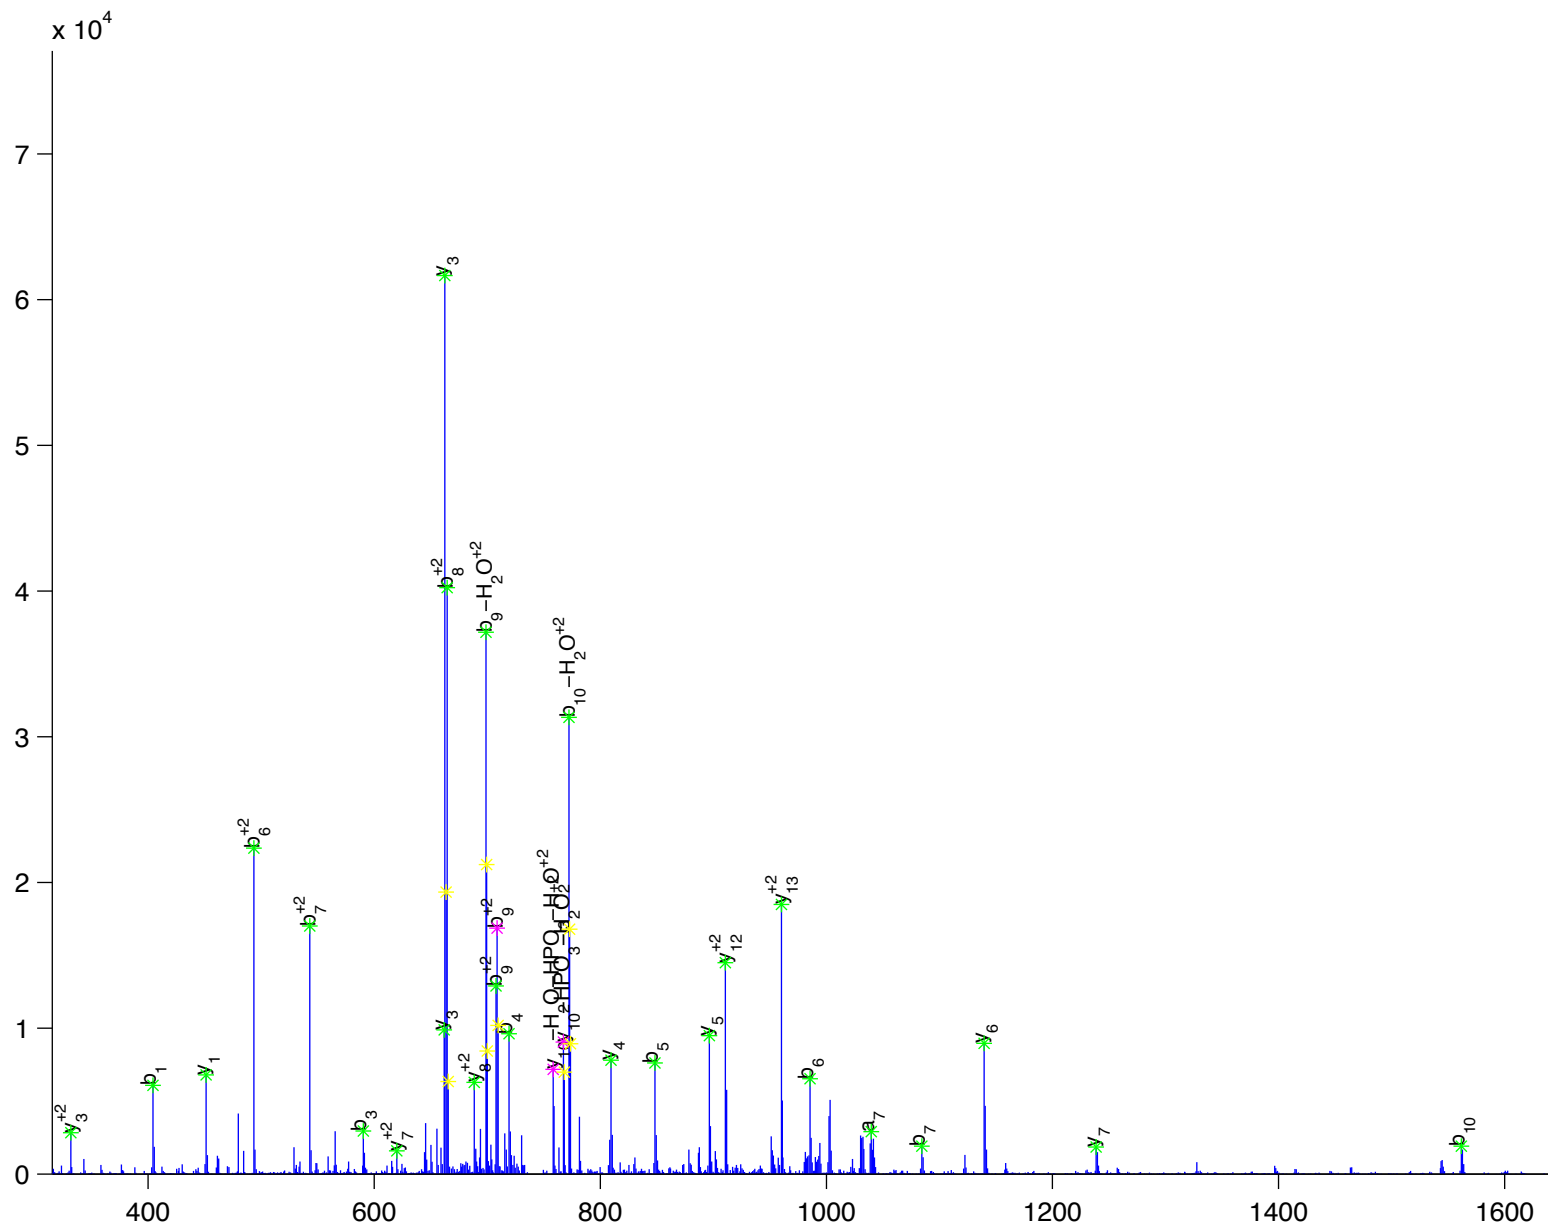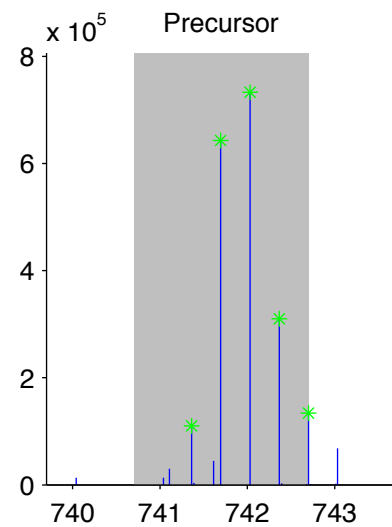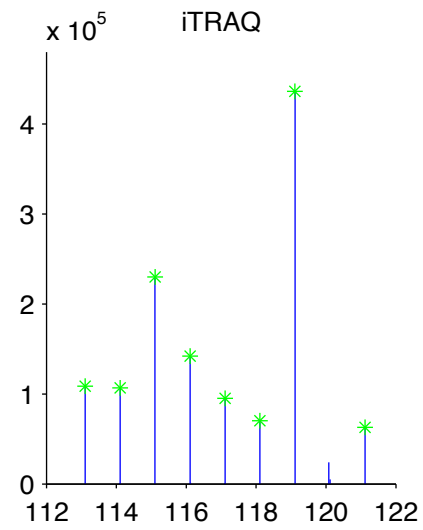



V [G] [E] [E] [E] [H] [V] [y] [S] [F] [P] [N] K

paxillin [Homo sapiens]

Charge State: +3

Scan Number: 5582

File Name: HJ050711\_GBMxeno\_bio1\_E\_HANNAH.raw

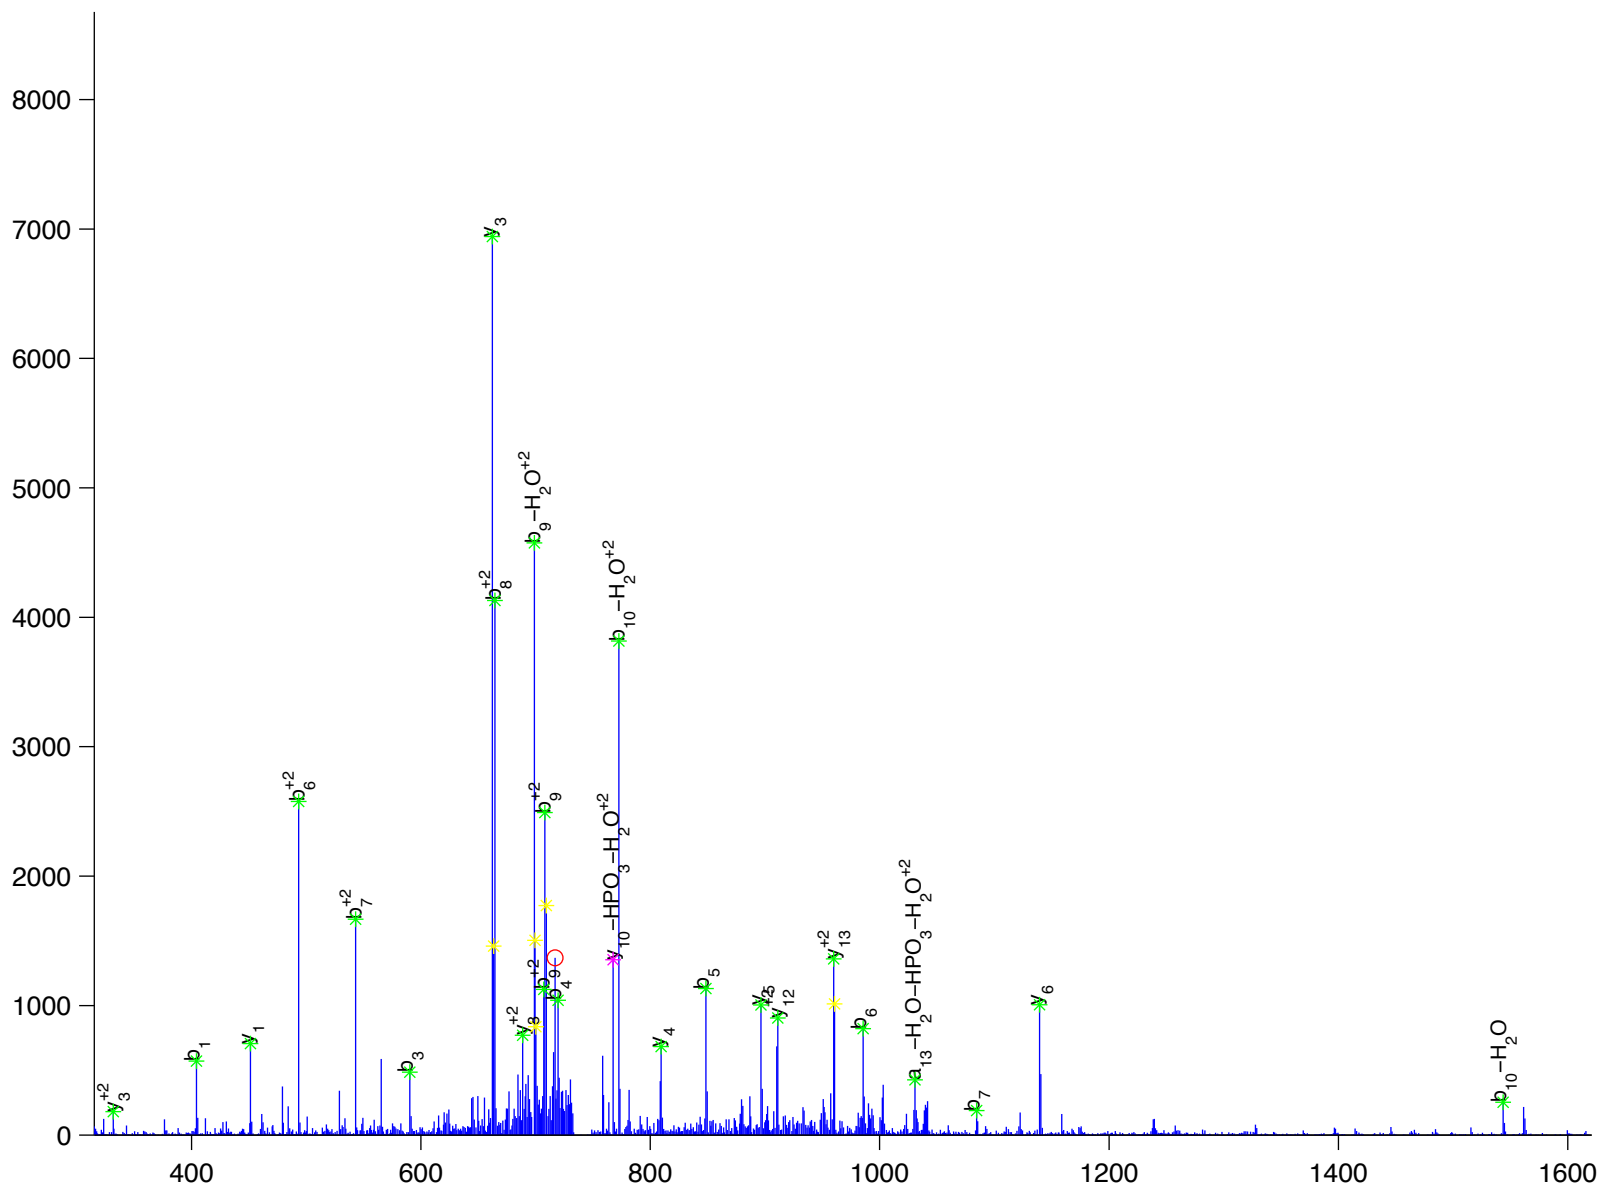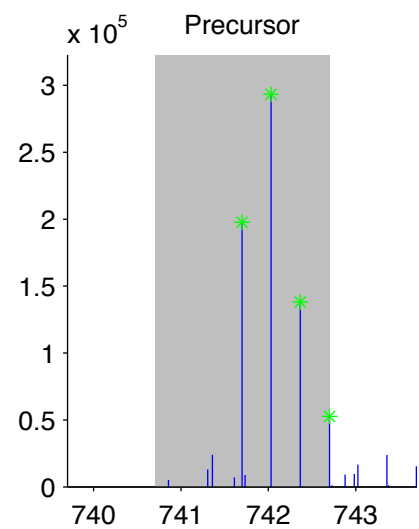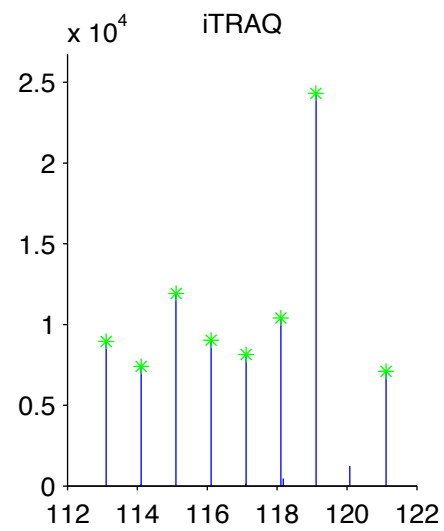

L [G] [E] [G] [T] y [A] [T] [V] [F] K

PCTAIRE protein kinase 3 isoform b [Homo sapiens]

Charge State: +2

Scan Number: 6431

File Name: HJ050711\_GBMxeno\_bio1\_E\_HANNAH.raw

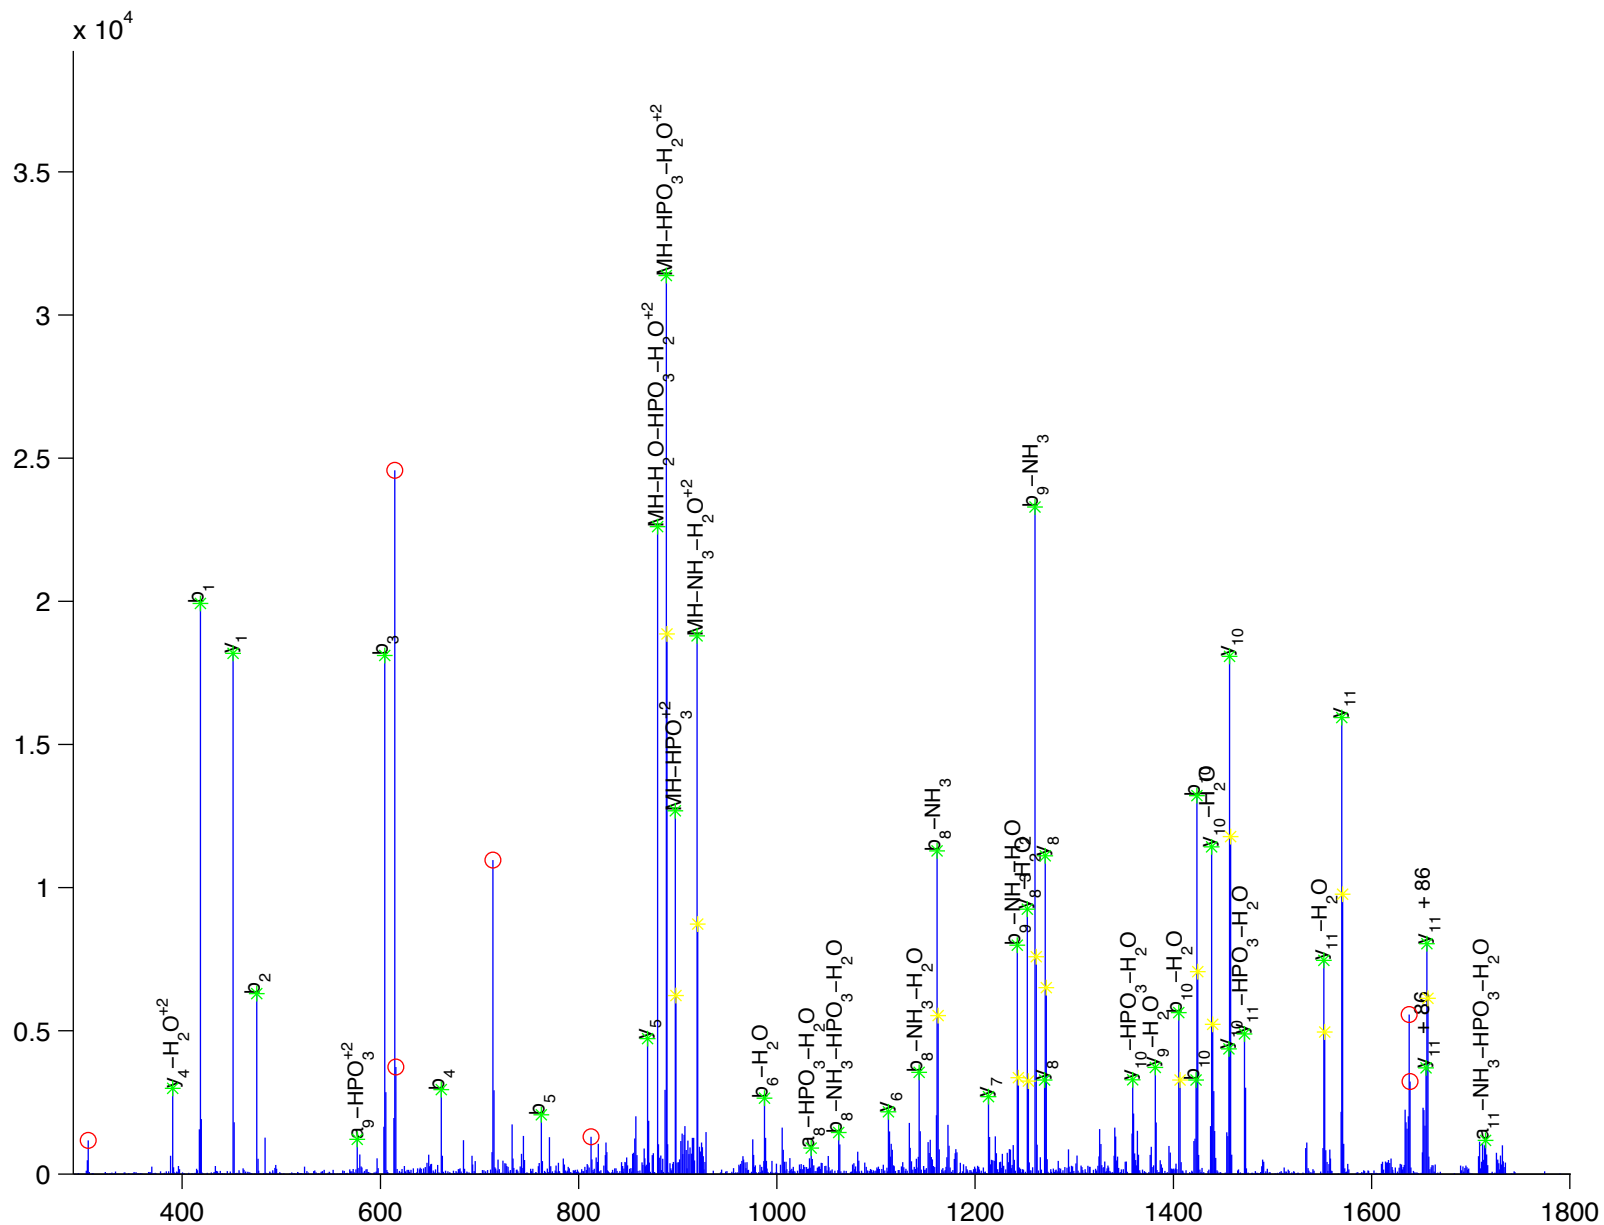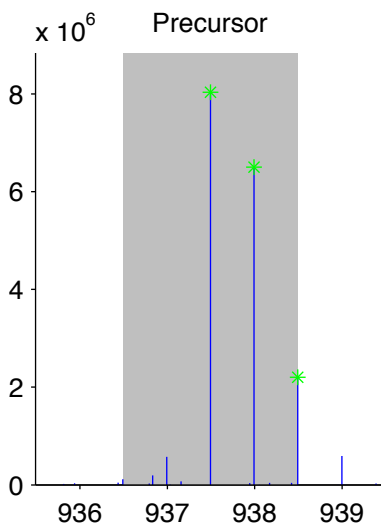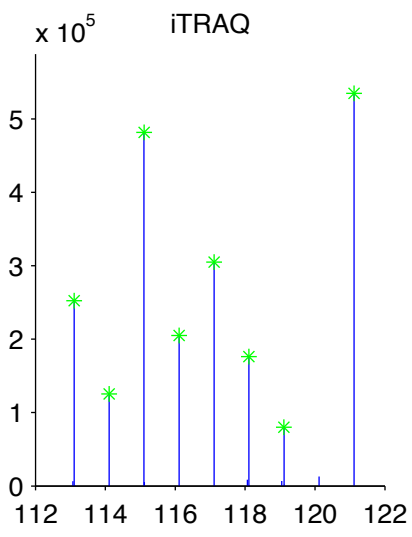

L [G] [E] [G] [T] y [A] [T] [V] [F] K

PCTAIRE protein kinase 3 isoform b [Homo sapiens]

Charge State: +2

Scan Number: 6433

File Name: HJ050711\_GBMxeno\_bio1\_E\_HANNAH.raw

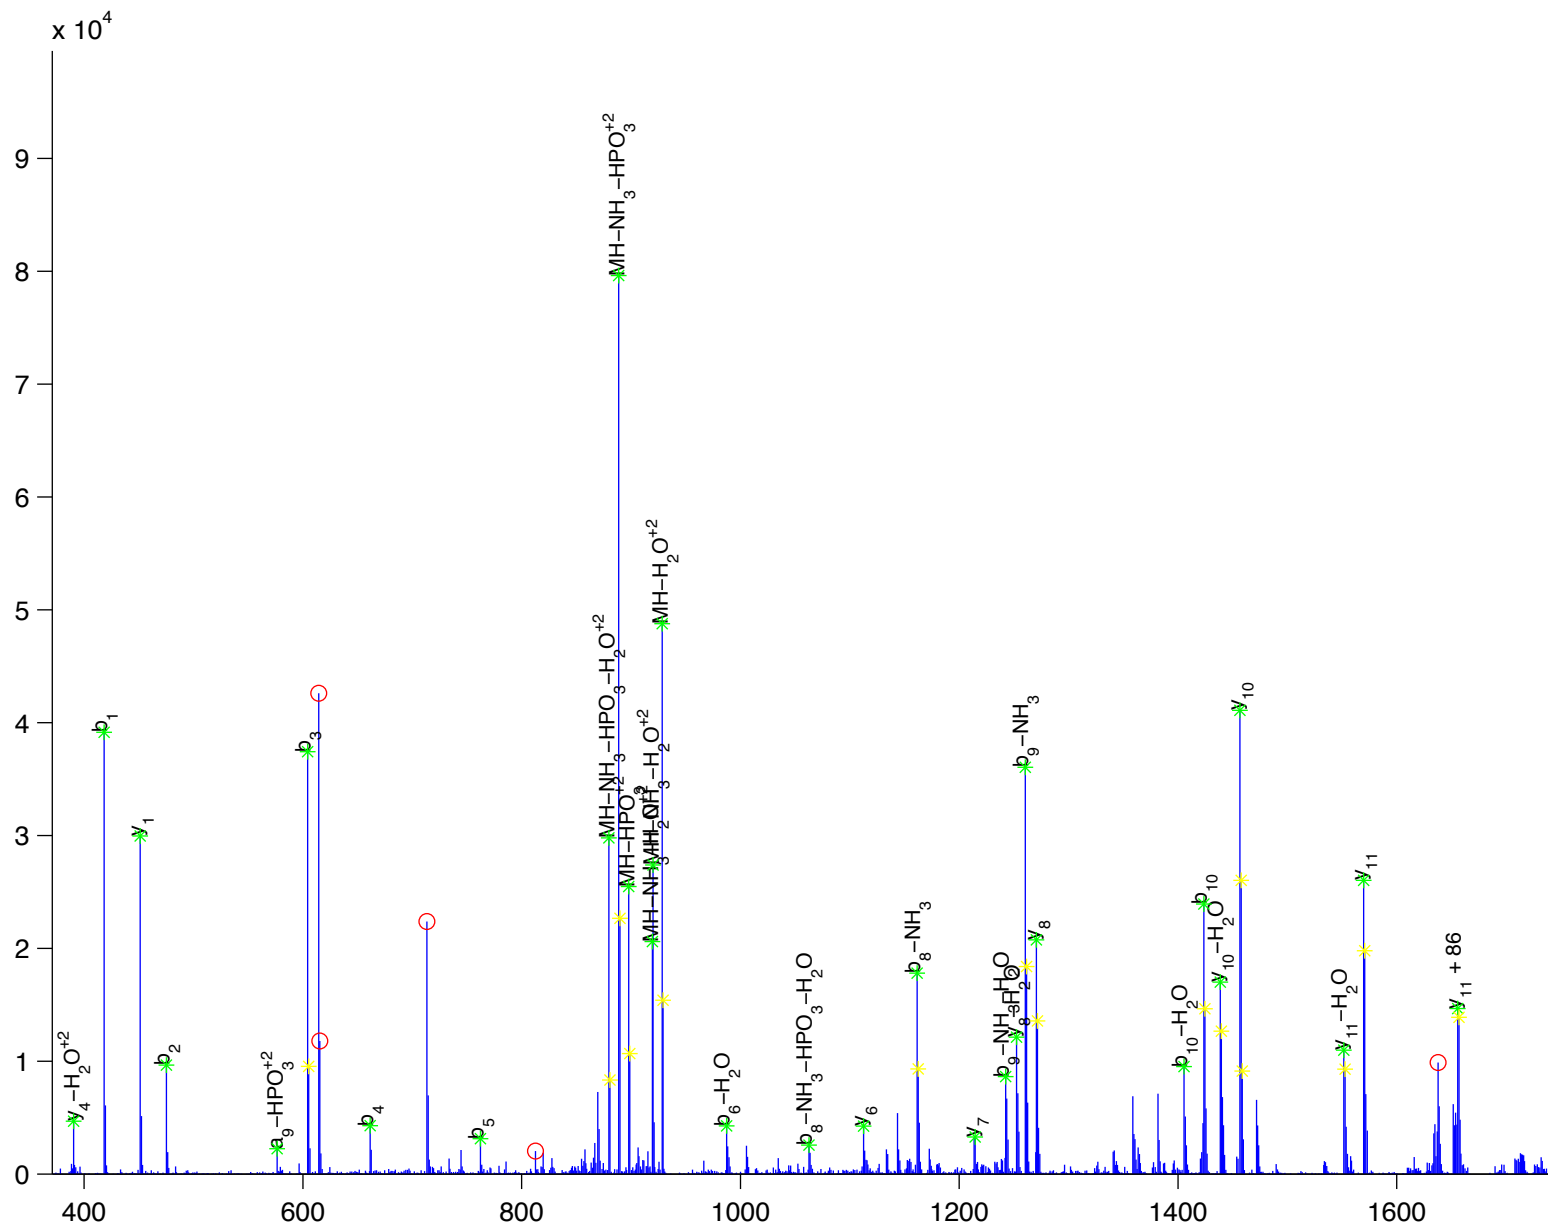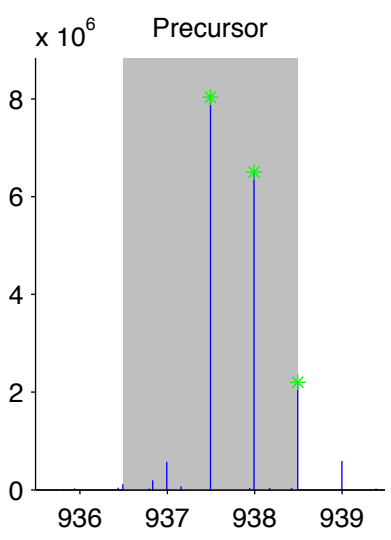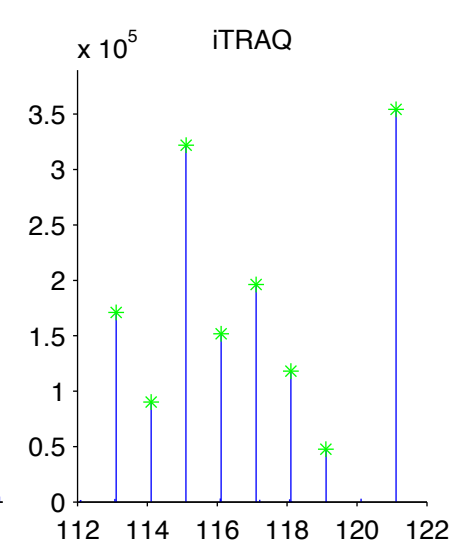

H[V]E[A]V[y]I[D]I[A]D]R

phosphatidylinositol transfer protein, alpha [Homo sapiens]

Charge State: +3

Scan Number: 6515

File Name: HJ050711\_GBMxeno\_bio1\_E\_HANNAH.raw

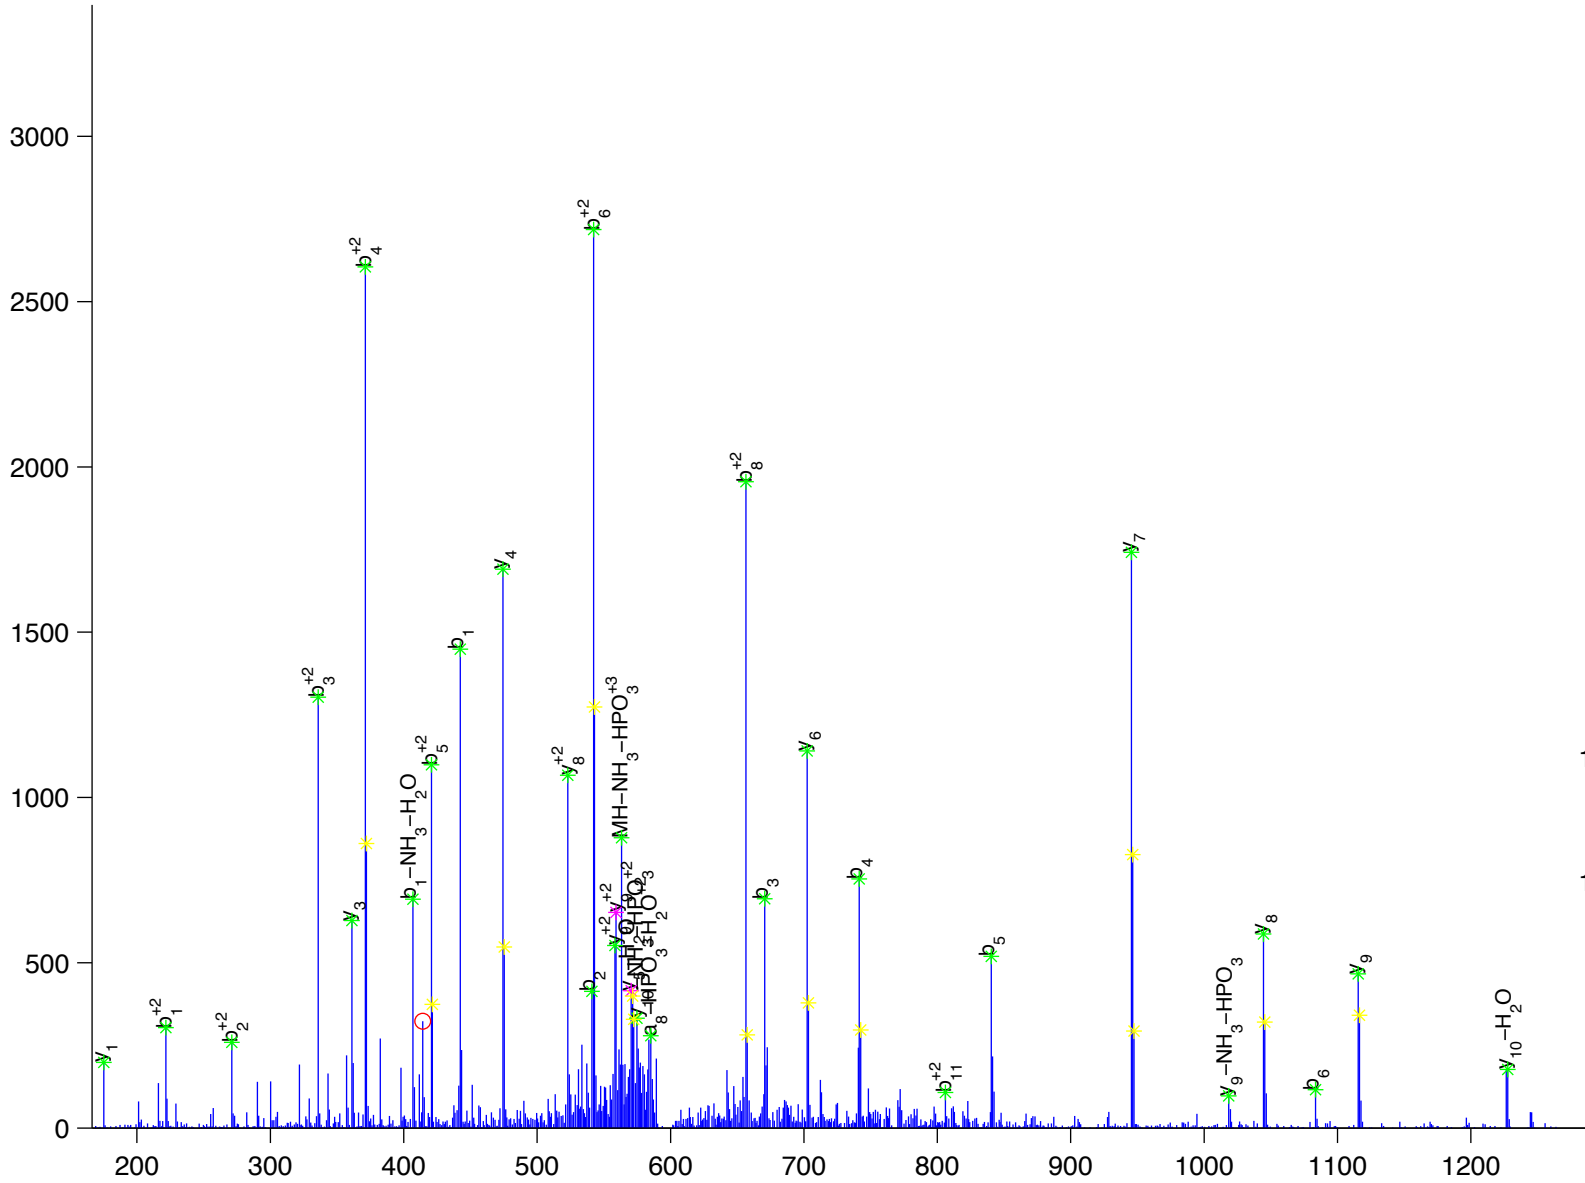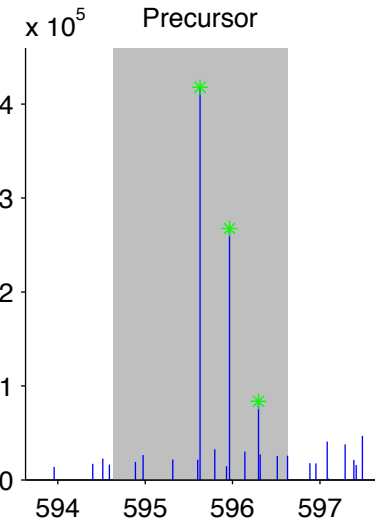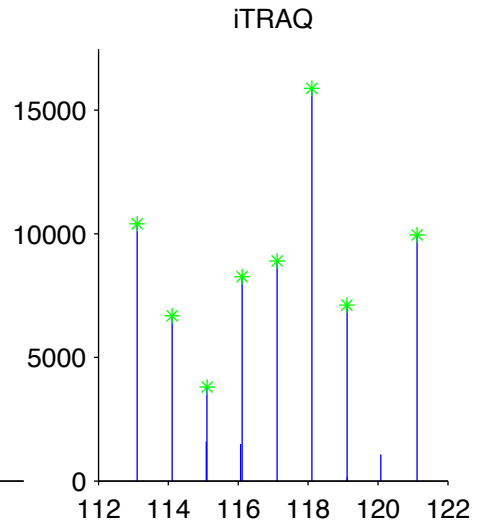

L [ y ] E [ E ] Y [ T ] R

phosphoinositide-3-kinase, regulatory subunit 1 (alpha) isoform 3 [Homo sapiens]

Charge State: +2

Scan Number: 5763

File Name: HJ050711\_GBMxeno\_bio1\_E\_HANNAH.raw

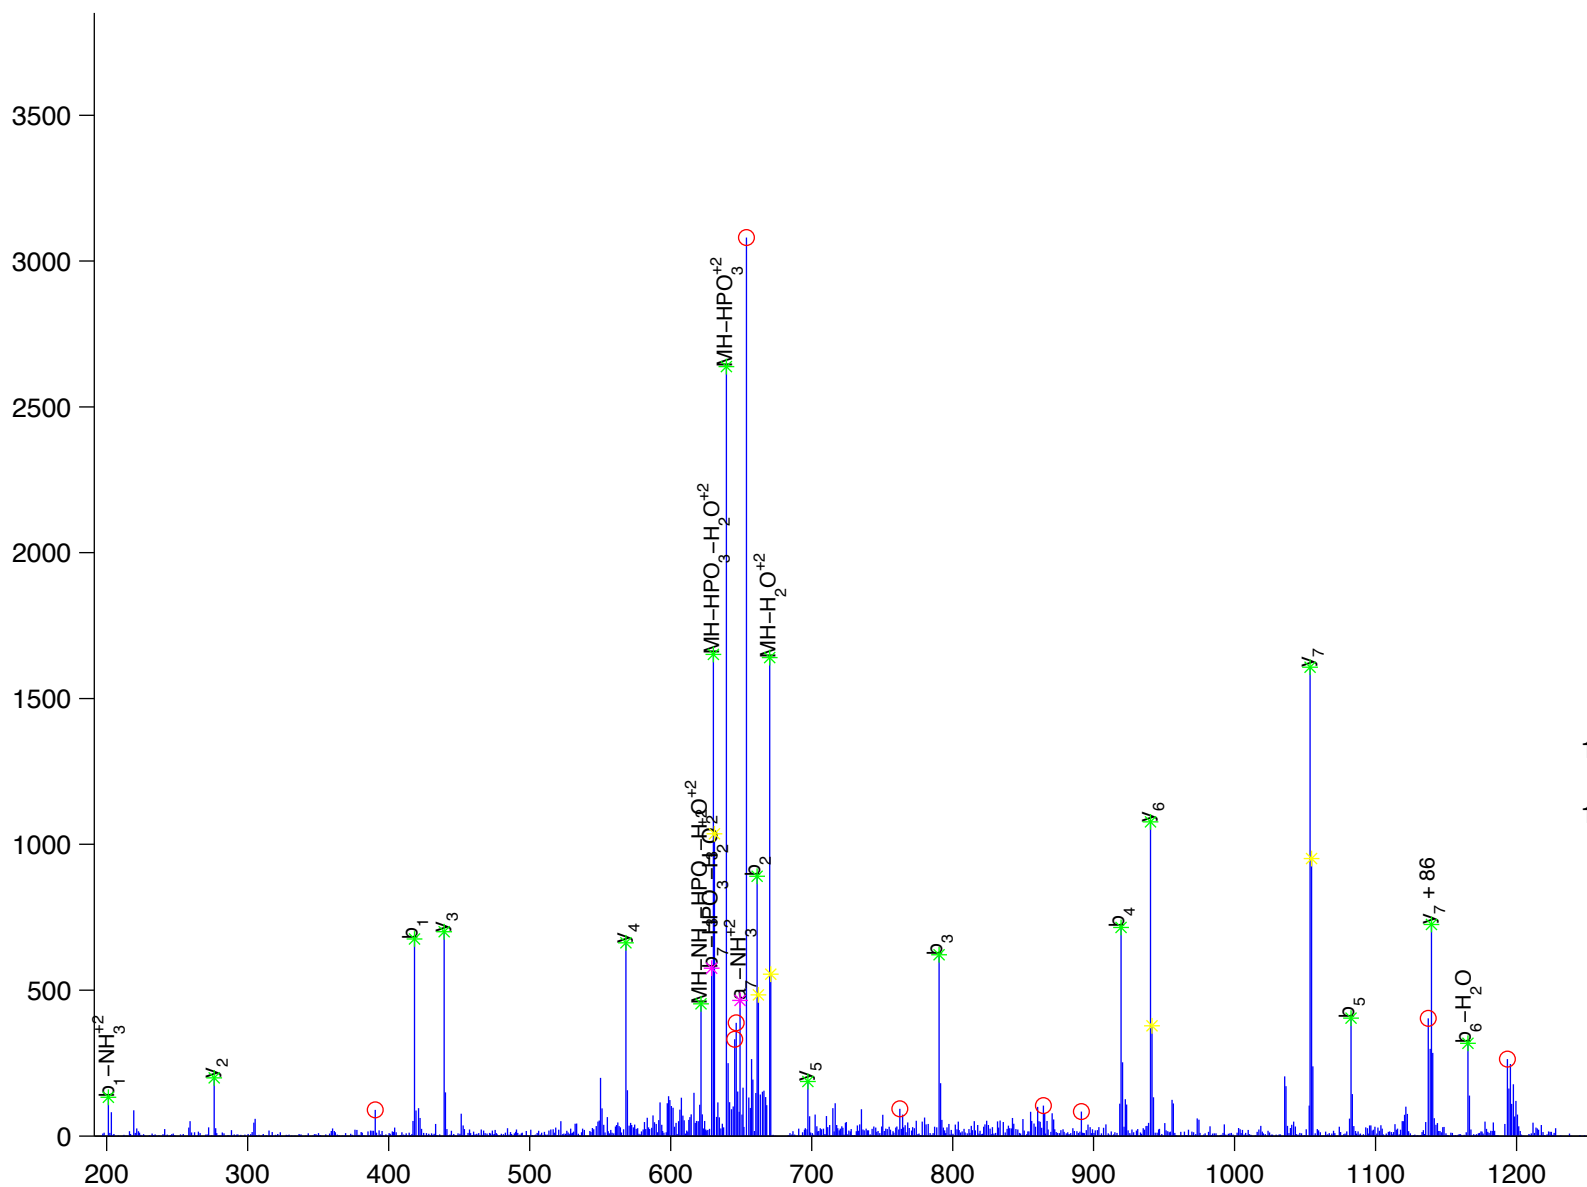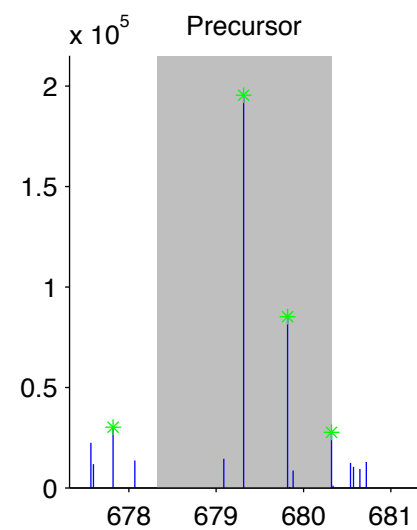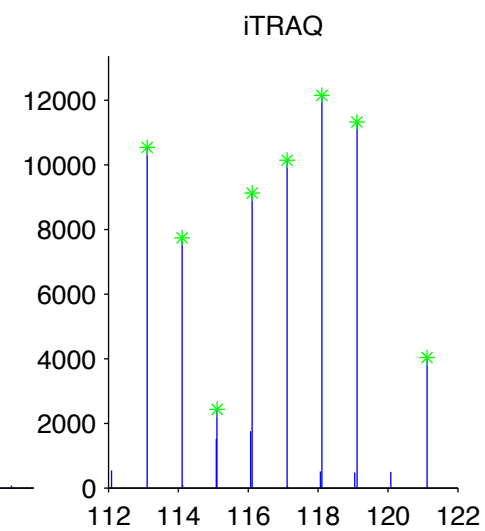

N[E]T[E]D[Q]y[A]L[M]E[D]E[D]D[L]P[H]H[E]E[R]

phosphoinositide-3-kinase, regulatory subunit 2 (beta) [Homo sapiens]

Charge State: +3

Scan Number: 5801

File Name: HJ050711\_GBMxeno\_bio1\_E\_HANNAH.raw

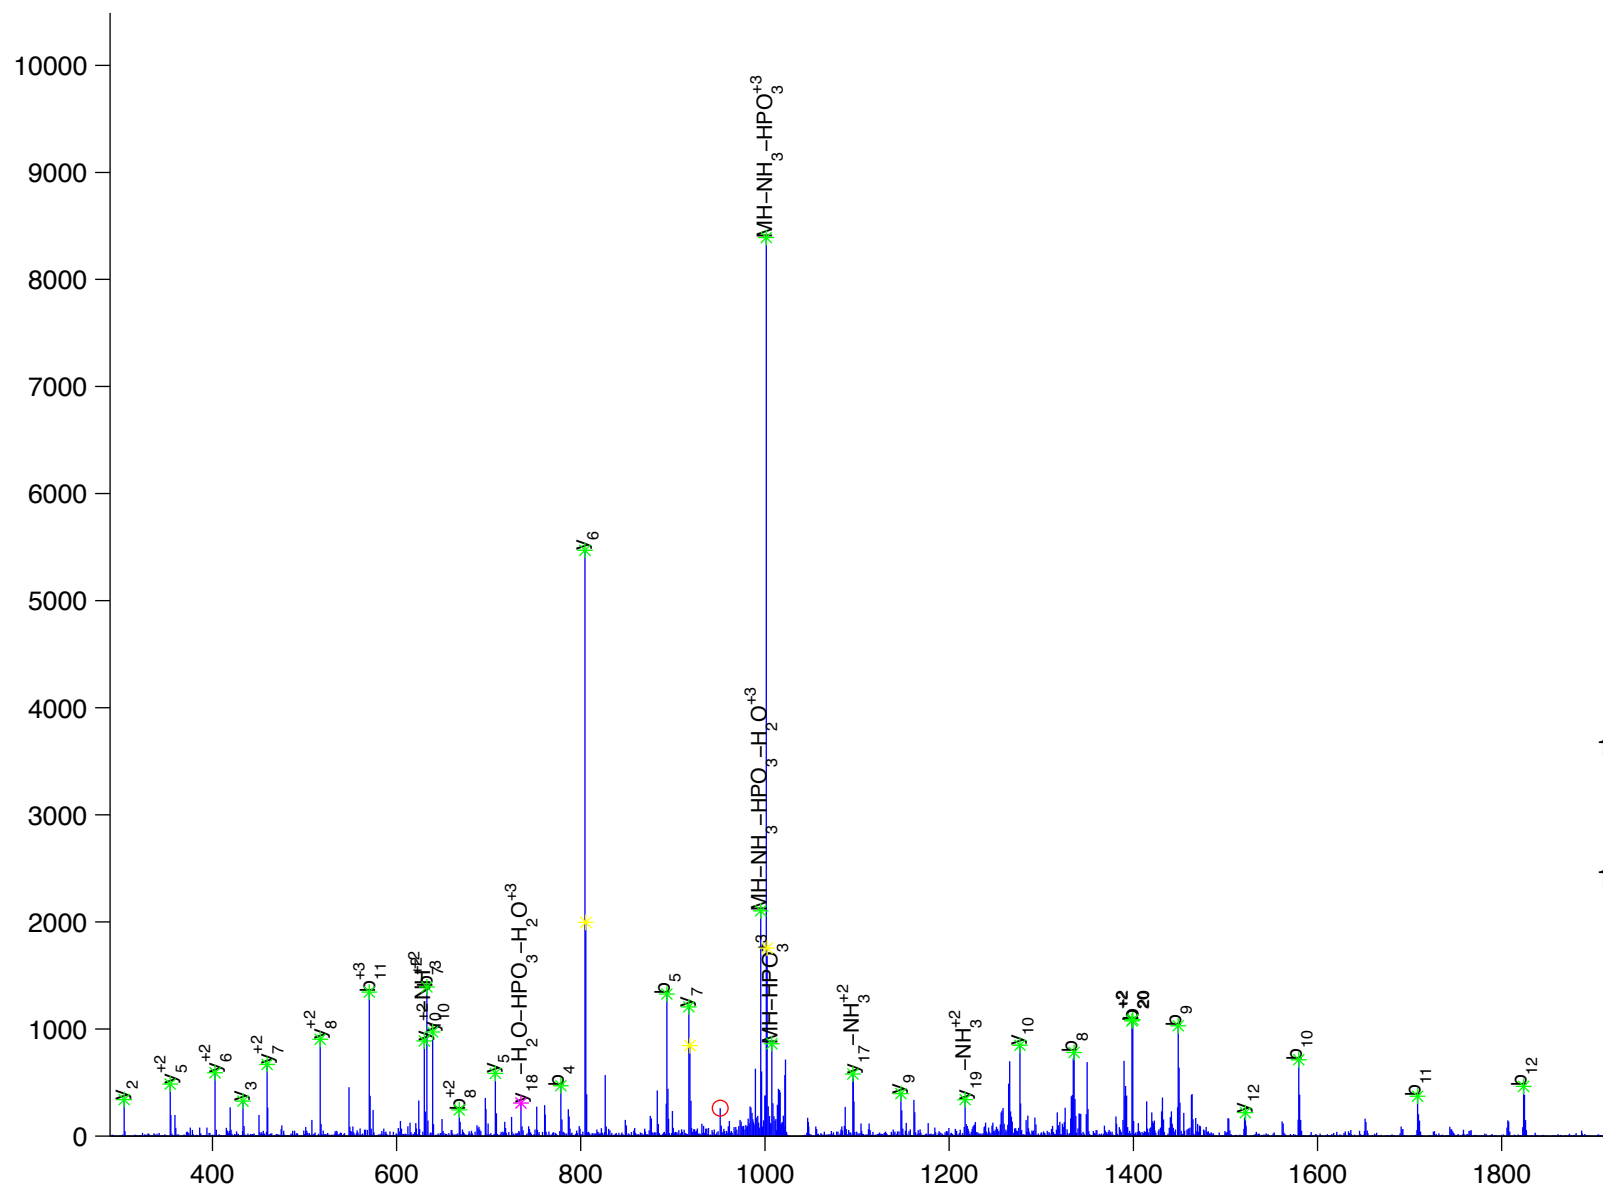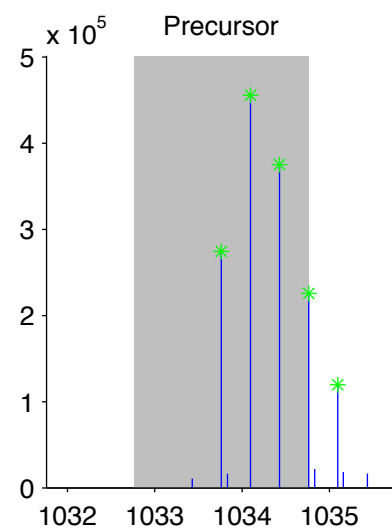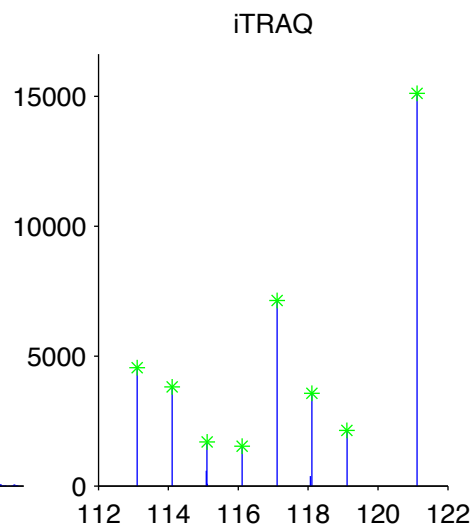

S [ R ] E [ Y ] D [ Q ] L [ y ] E [ E ] Y [ T ] R

phosphoinositide-3-kinase, regulatory subunit 2 (beta) [Homo sapiens]

Charge State: +3

Scan Number: 6067

File Name: HJ050711\_GBMxeno\_bio1\_E\_HANNAH.raw

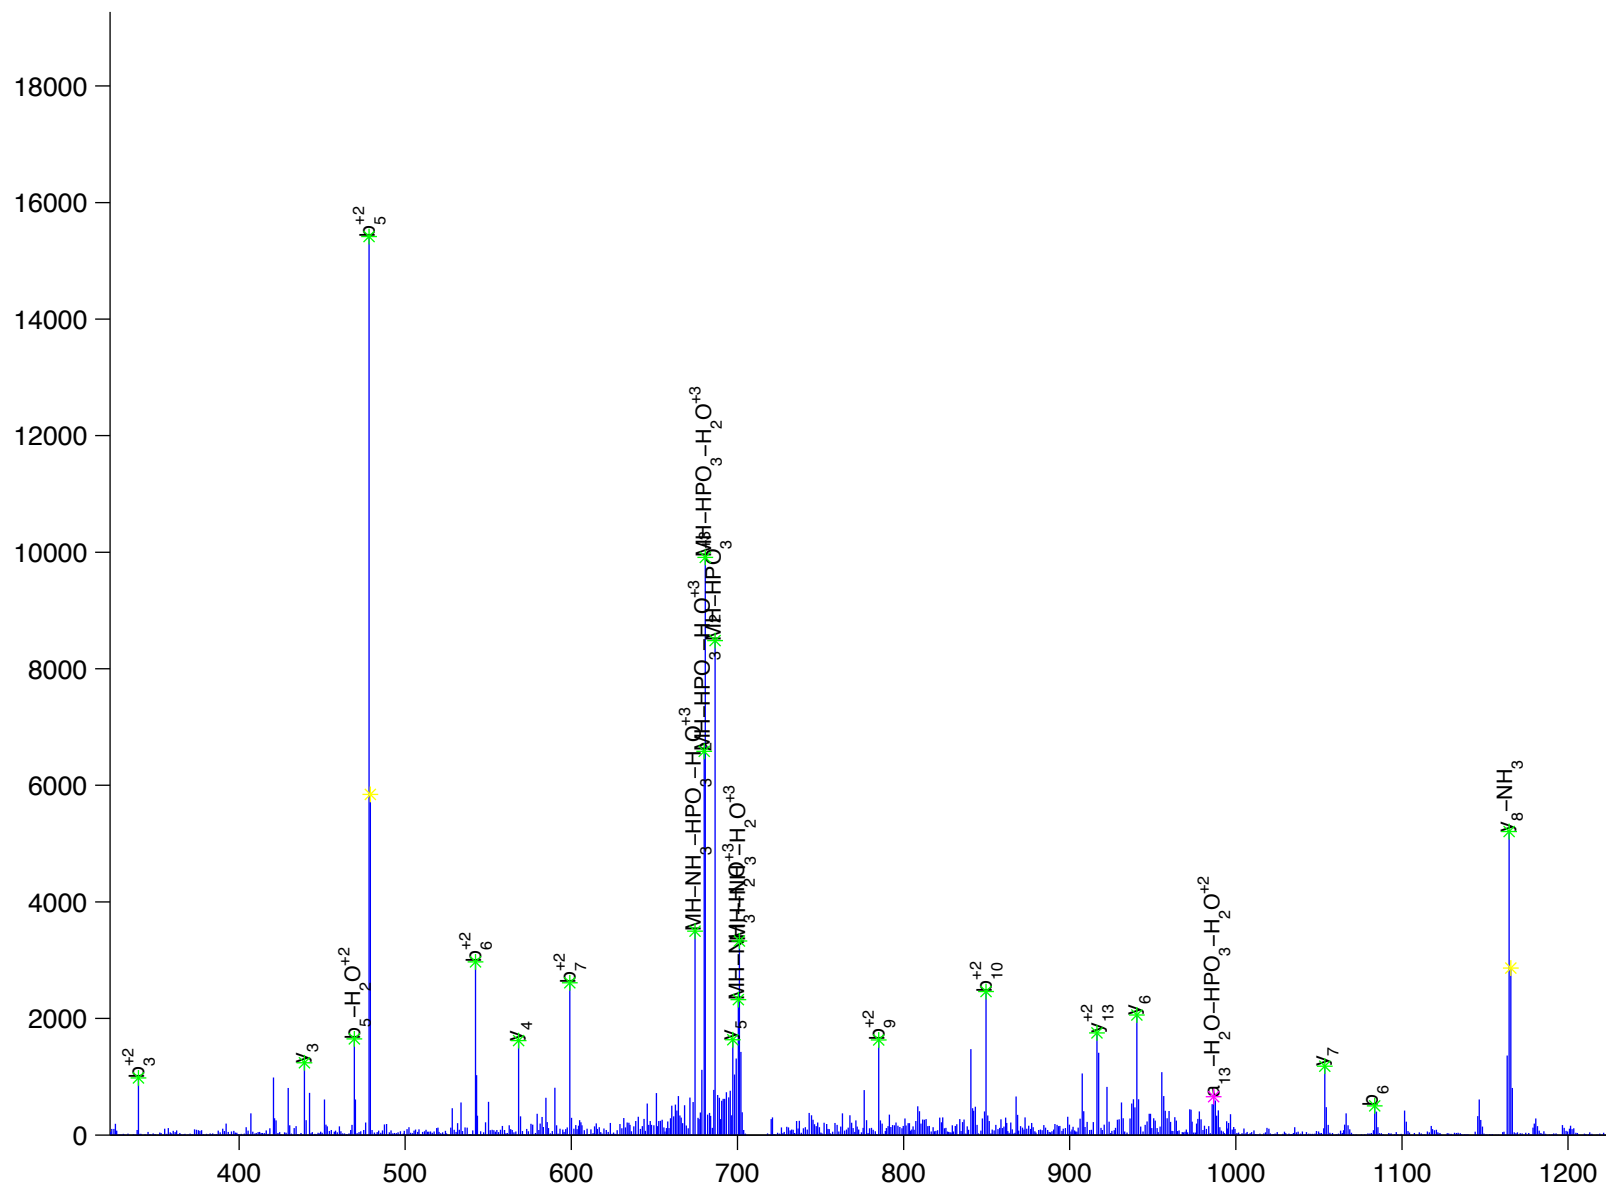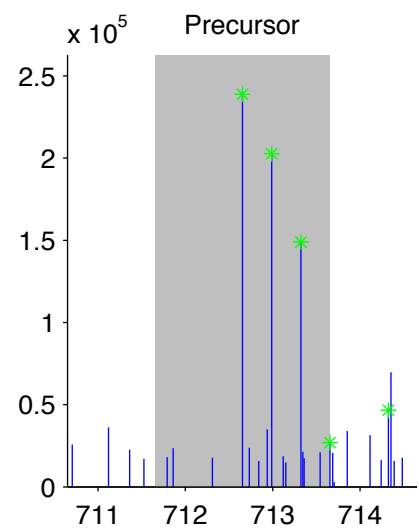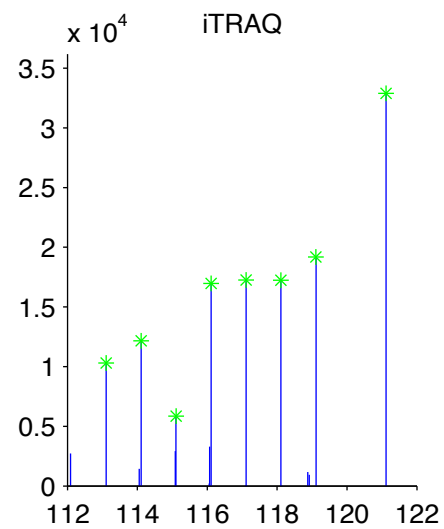

E [ Y ] [ D ] [ Q ] [ L ] y [ E ] [ E ] [ Y ] [ T ] R

phosphoinositide-3-kinase, regulatory subunit 2 (beta) [Homo sapiens]

Charge State: +2

Scan Number: 6989

File Name: HJ050711\_GBMxeno\_bio1\_E\_HANNAH.raw

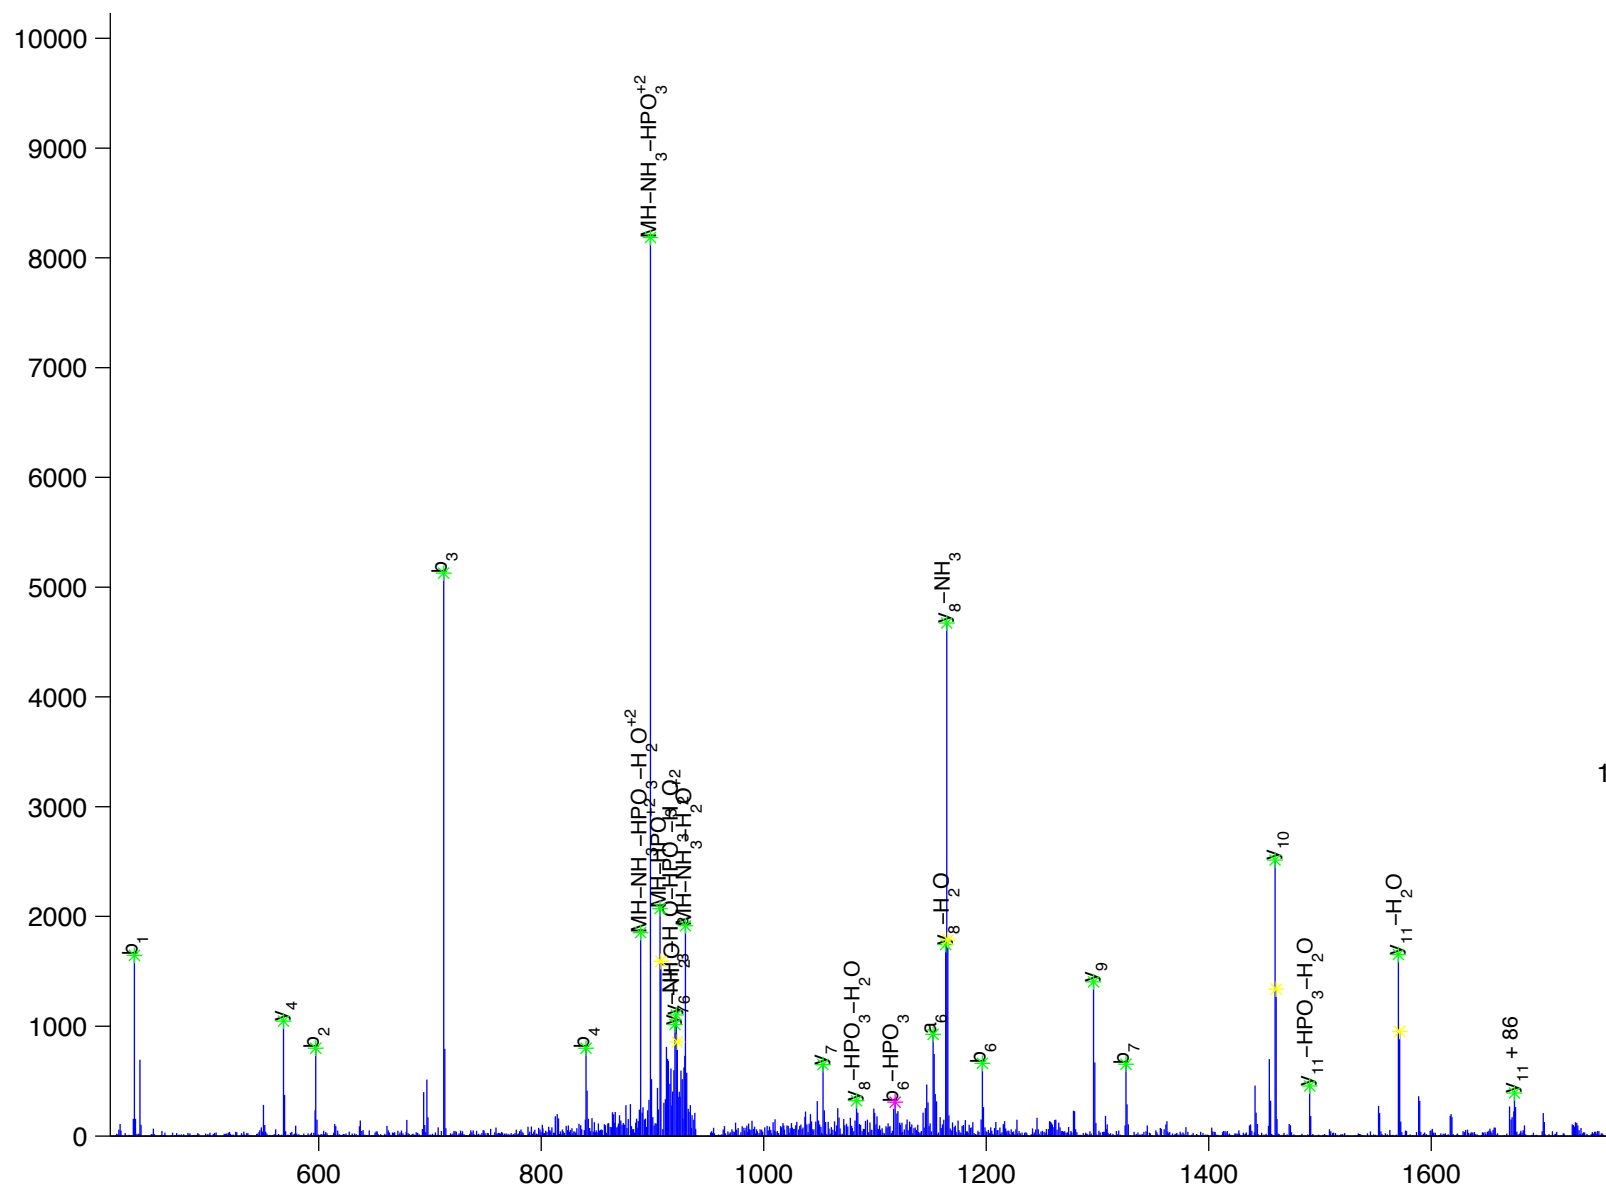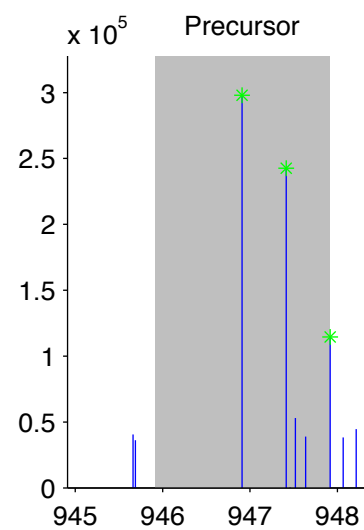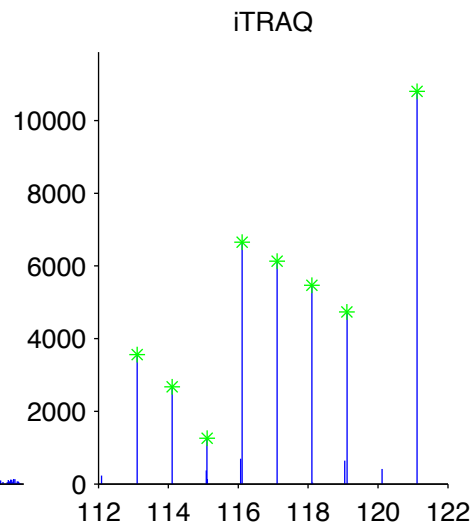



I [G] T [A] E [P] D [y] [G] A [L] Y [E] [G] R

phospholipase C gamma 1 isoform b [Homo sapiens]

Charge State: +2

Scan Number: 6723

File Name: HJ050711\_GBMxeno\_bio1\_E\_HANNAH.raw

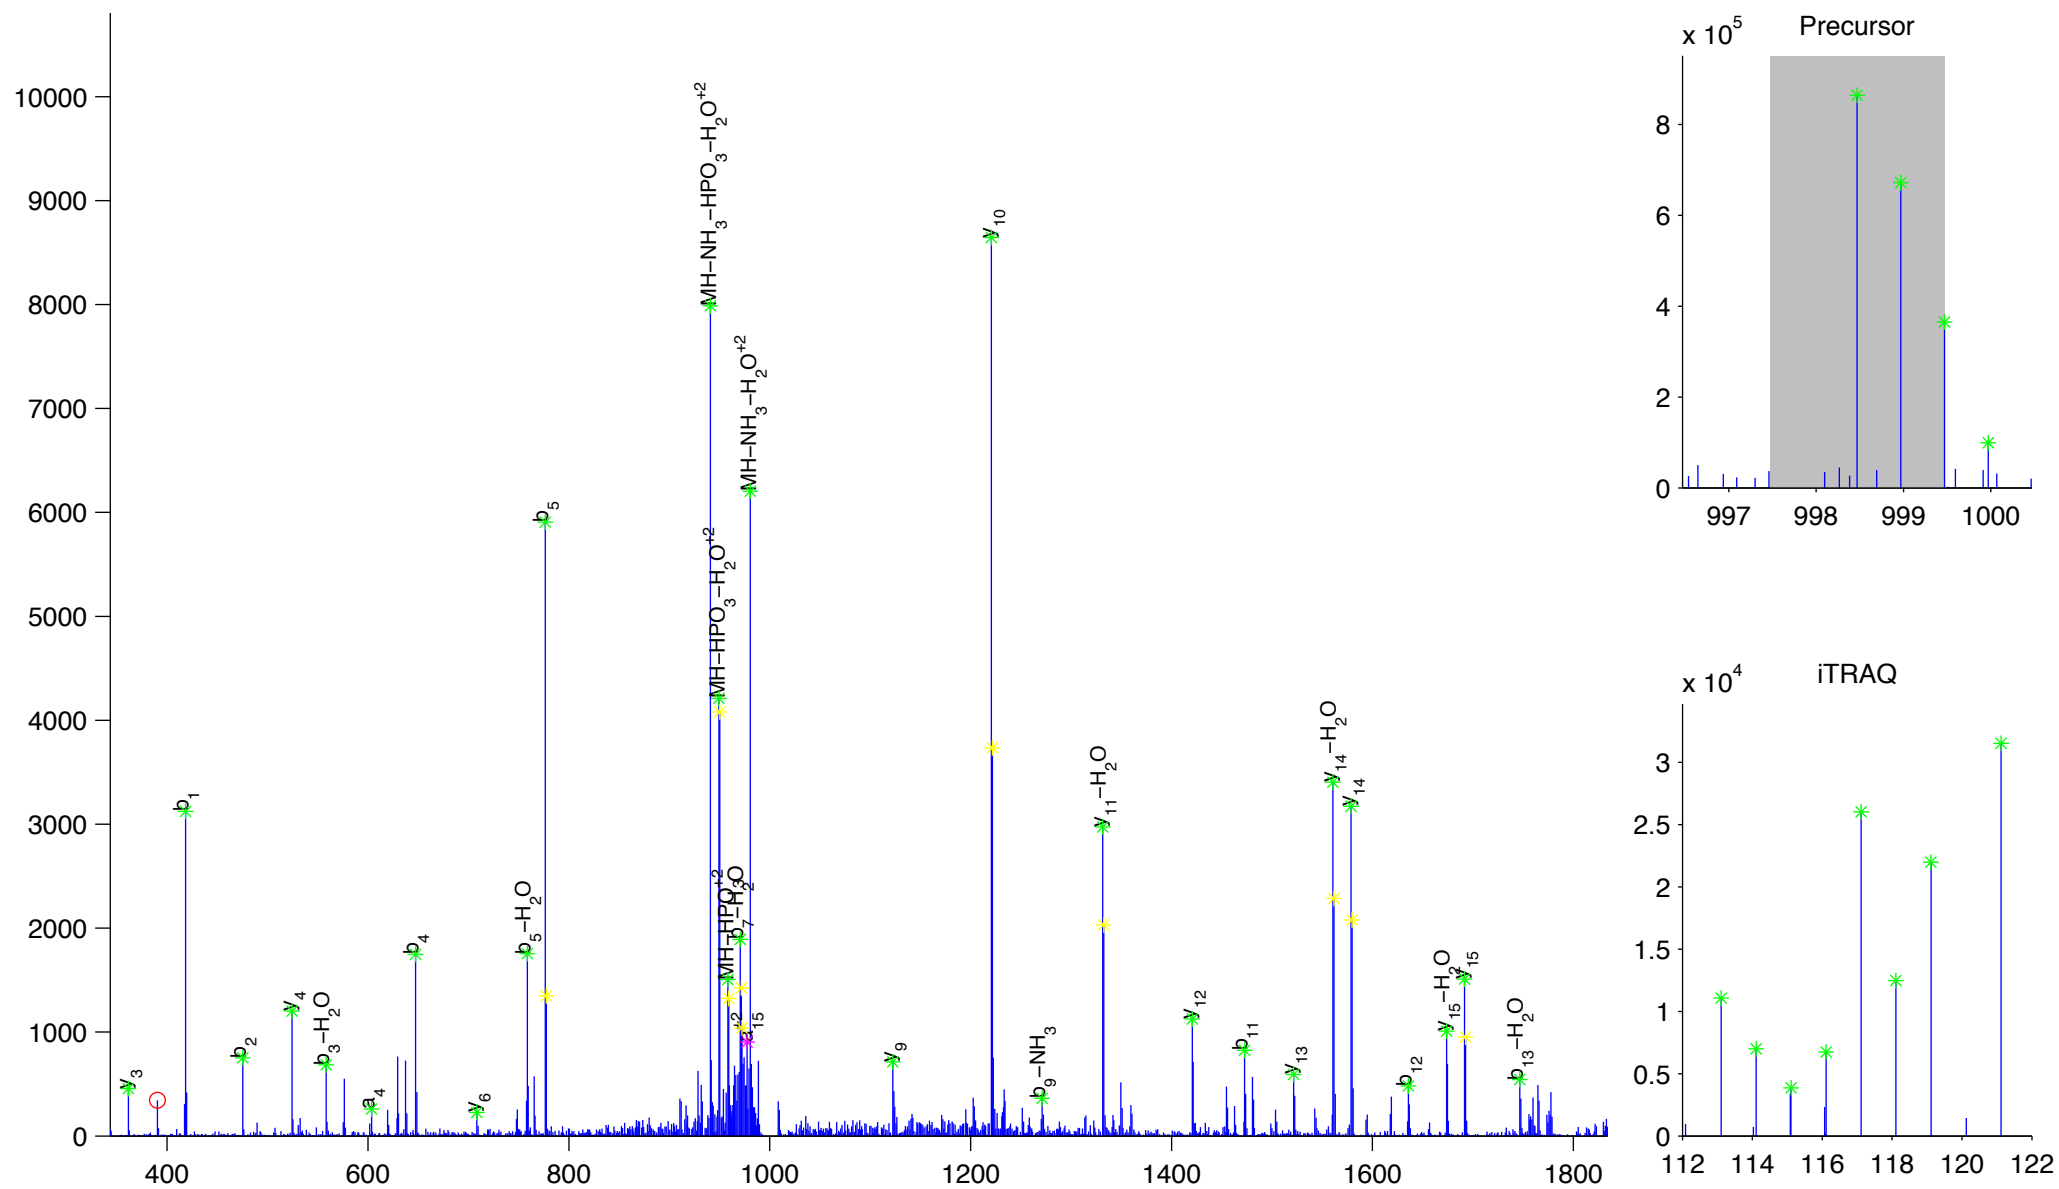

I [G] [T] [A] [E] [P] [D] y [G] [A] [L] [Y] [E] [G] R

phospholipase C gamma 1 isoform b [Homo sapiens]

Charge State: +2

Scan Number: 6746

File Name: HJ050711\_GBMxeno\_bio1\_E\_HANNAH.raw

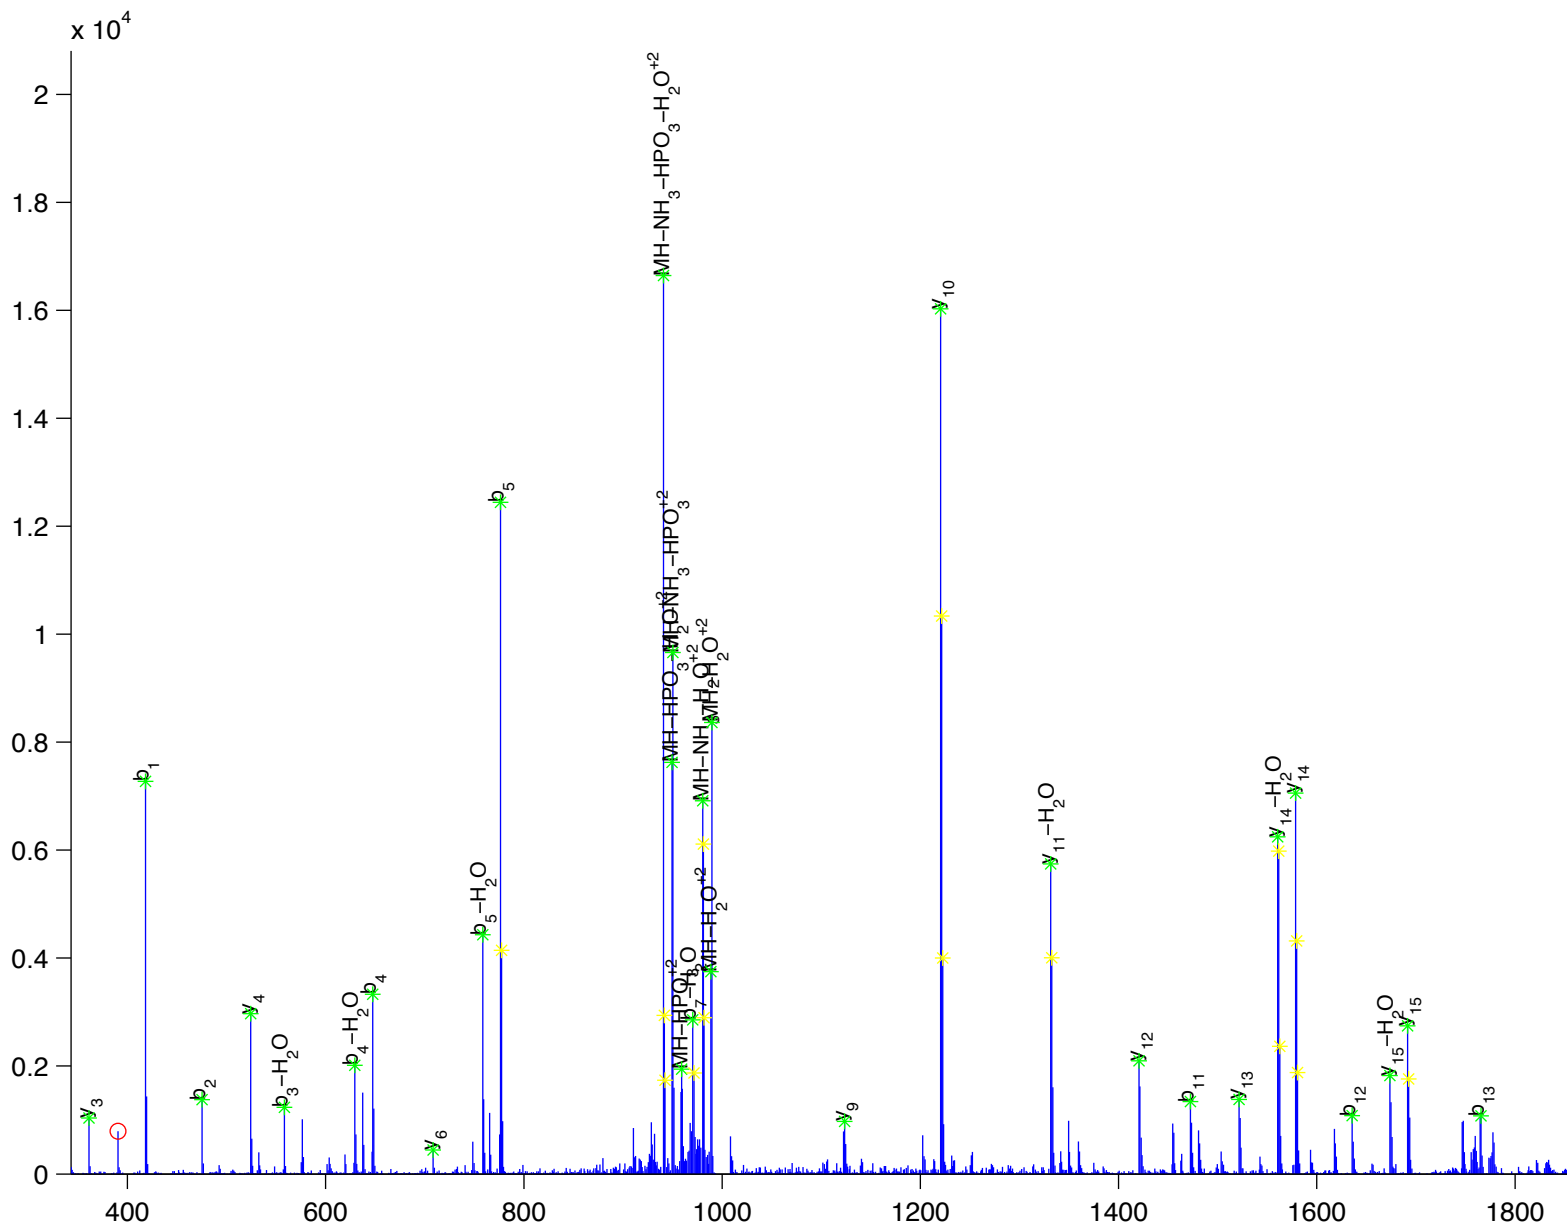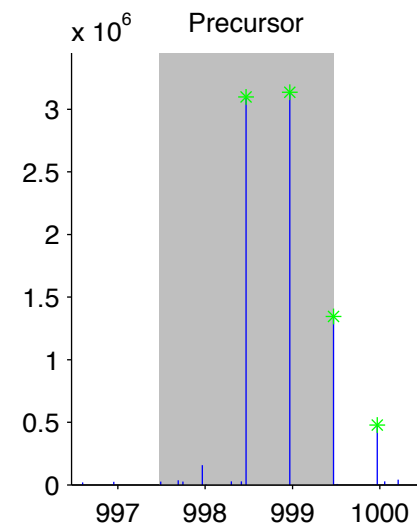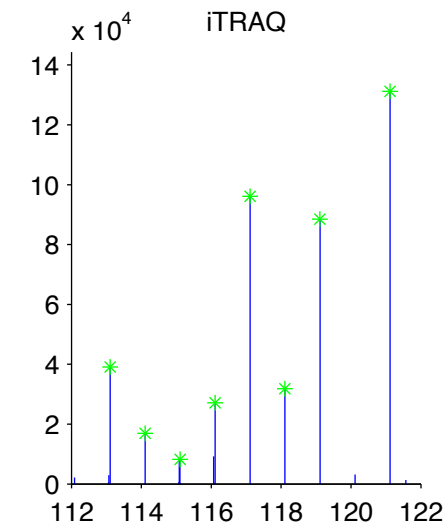

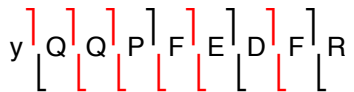

phospholipase C gamma 1 isoform b [Homo sapiens]

Charge State: +3

Scan Number: 7340

File Name: HJ050711\_GBMxeno\_bio1\_E\_HANNAH.raw

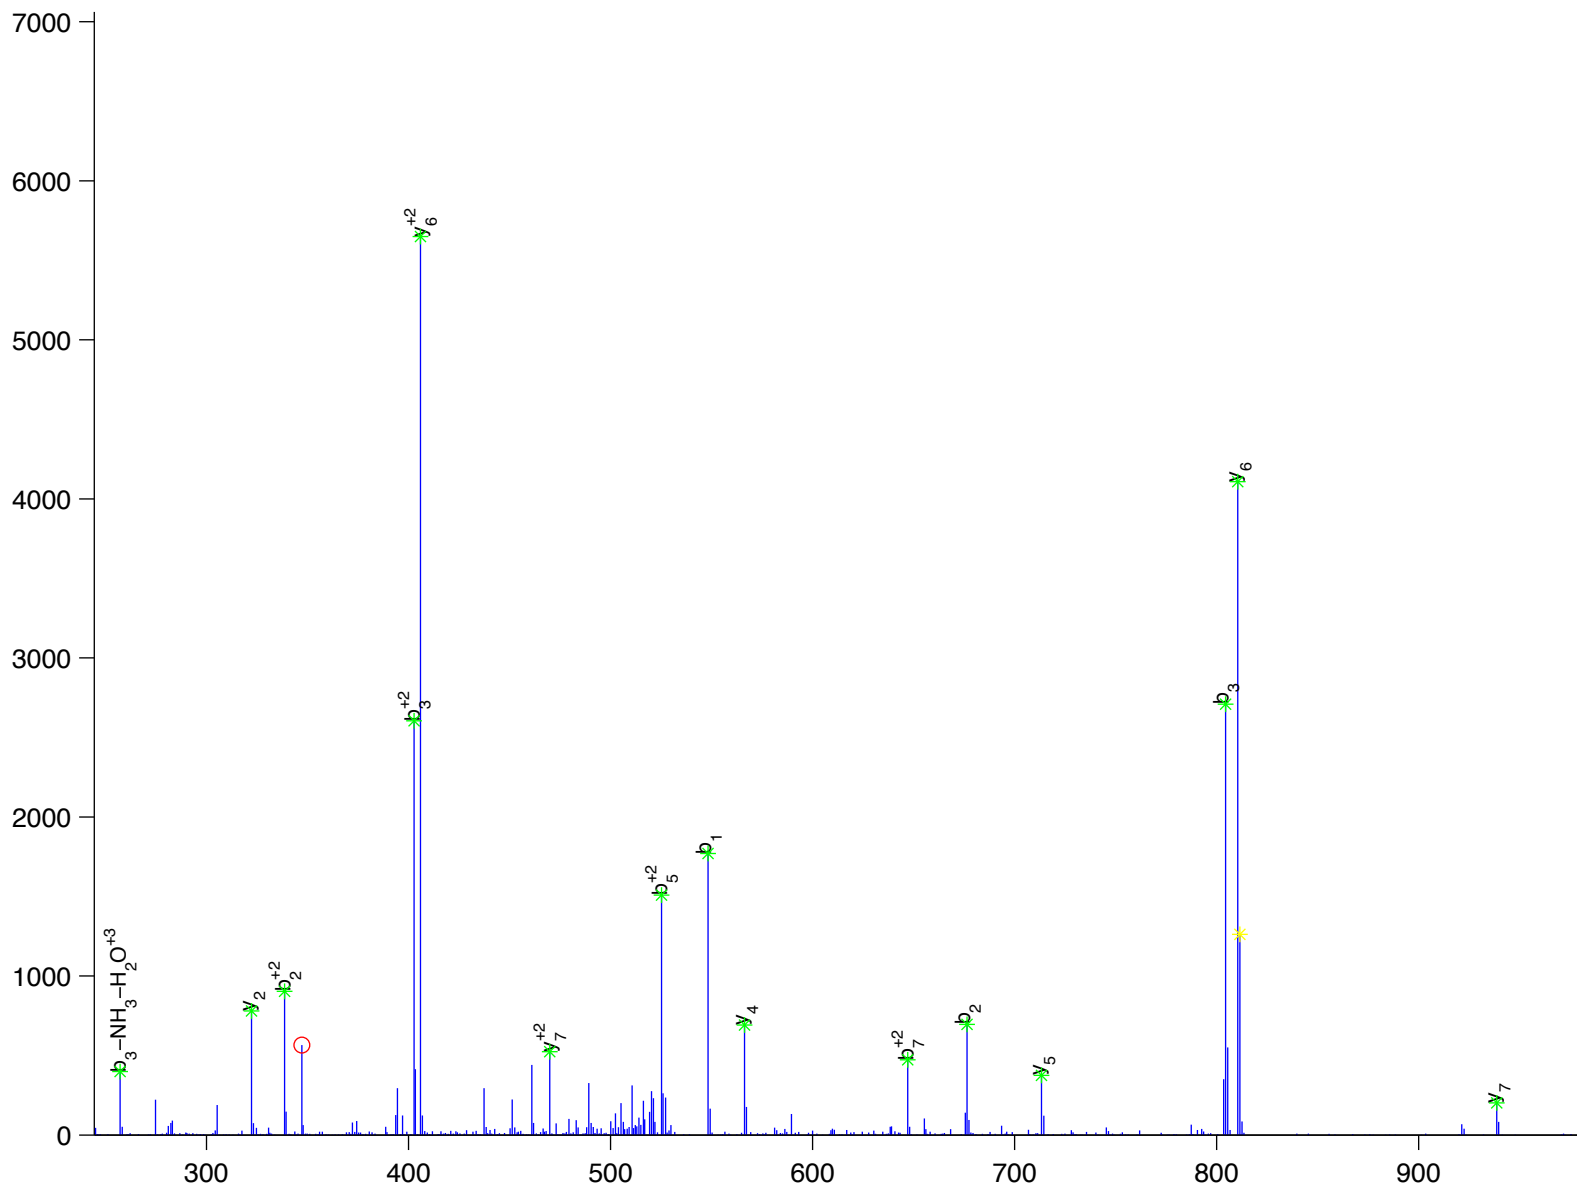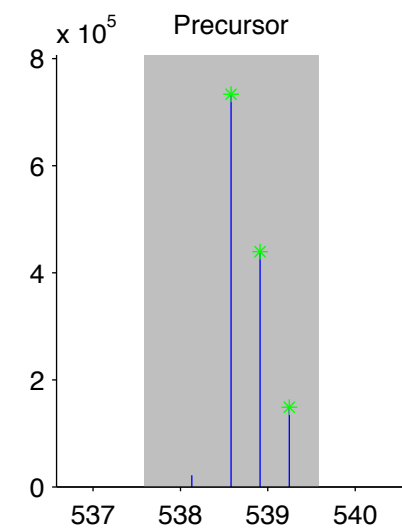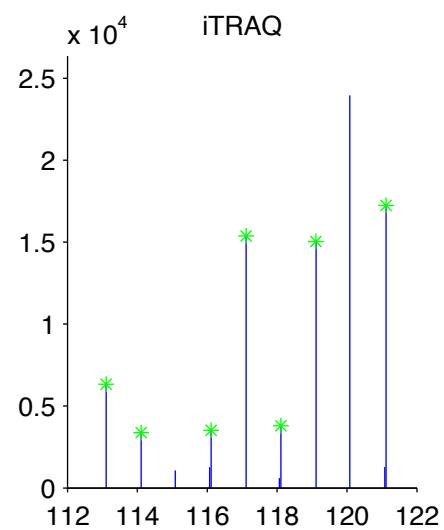

N [ P ] G [ F ] y [ V ] E [ A ] N [ P ] M [ P ] T [ F ] K

phospholipase C gamma 1 isoform b [Homo sapiens]

Charge State: +3

Scan Number: 8306

File Name: HJ050711\_GBMxeno\_bio1\_E\_HANNAH.raw

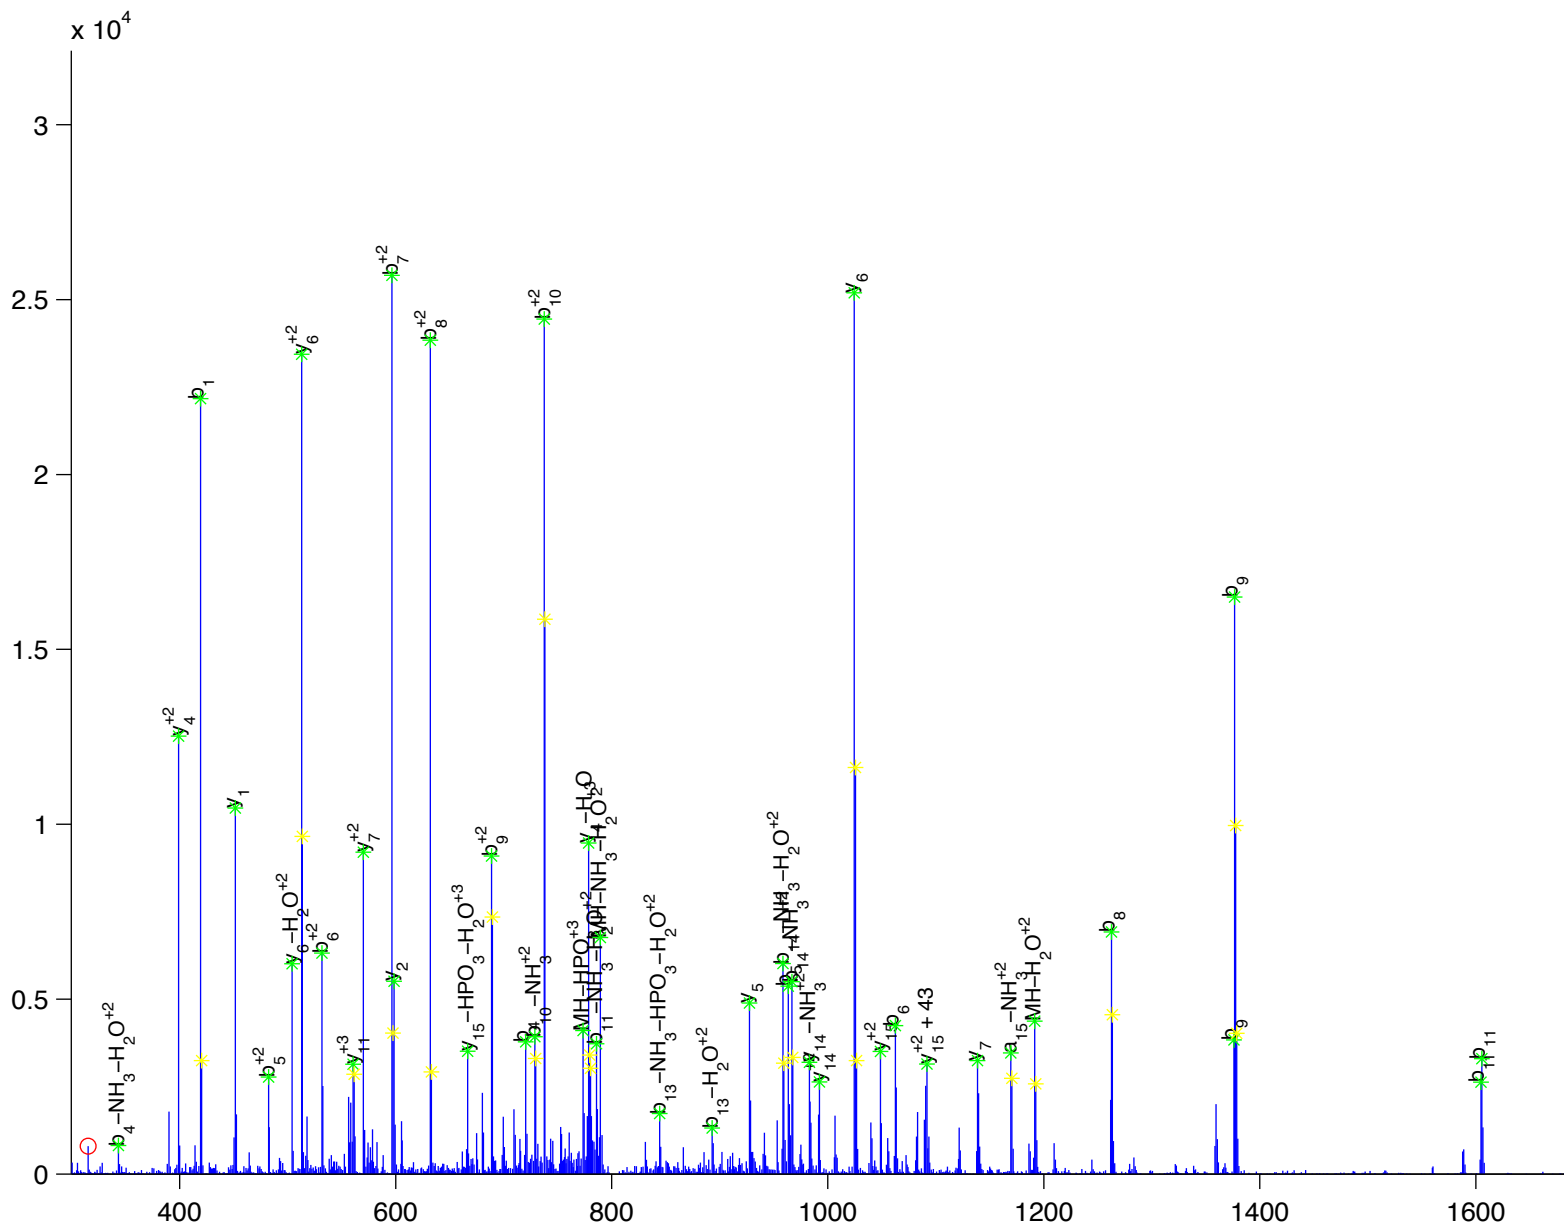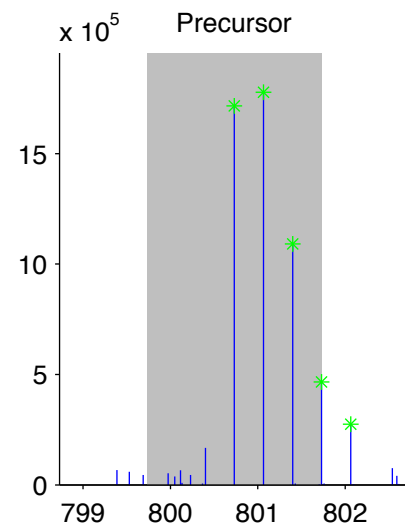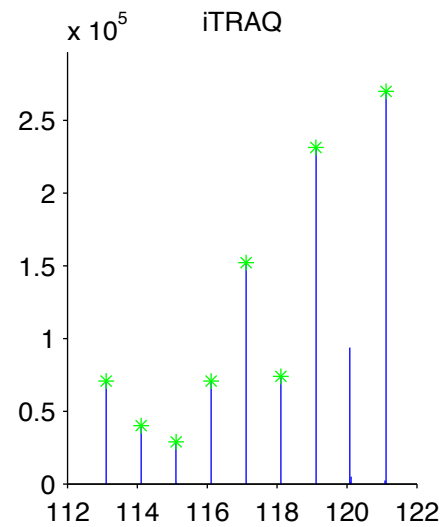

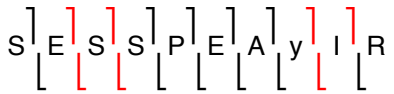

phospholipase C, gamma 2 [Homo sapiens]

Charge State: +2

Scan Number: 6116

File Name: HJ050711\_GBMxeno\_bio1\_E\_HANNAH.raw

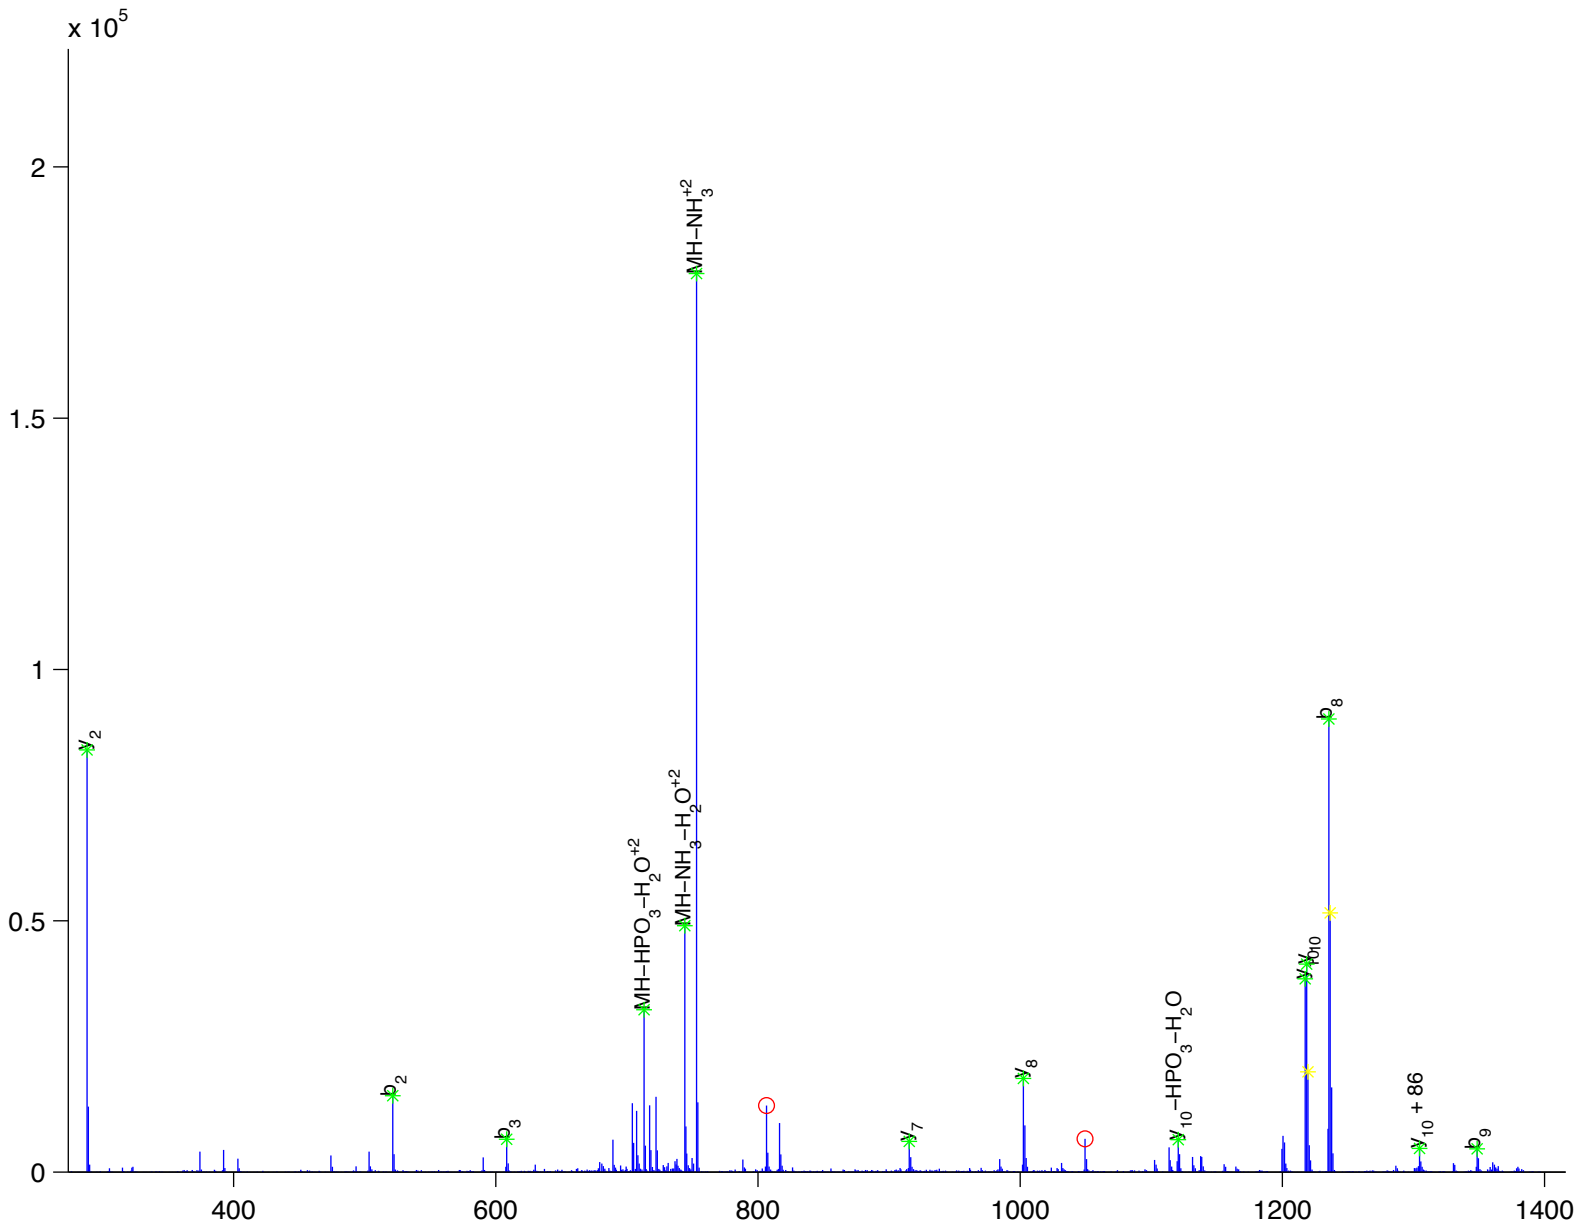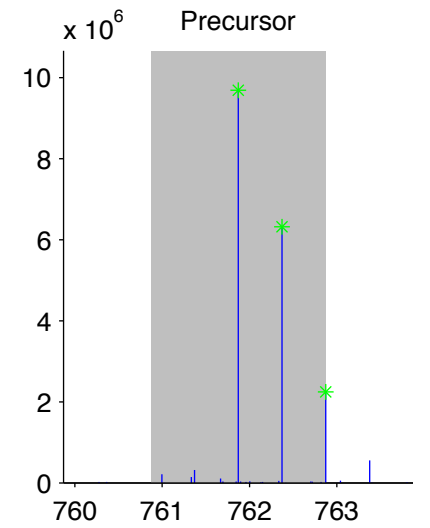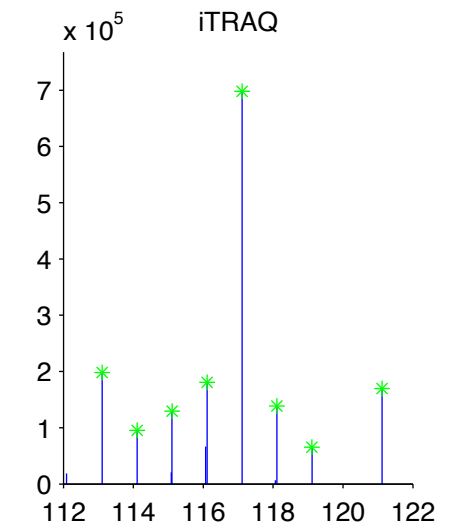

y [ S ] [ D ] [ I ] [ Q ] R

platelet-derived growth factor receptor alpha precursor [Homo sapiens]

Charge State: +2

Scan Number: 2980

File Name: HJ050711\_GBMxeno\_bio1\_E\_HANNAH.raw

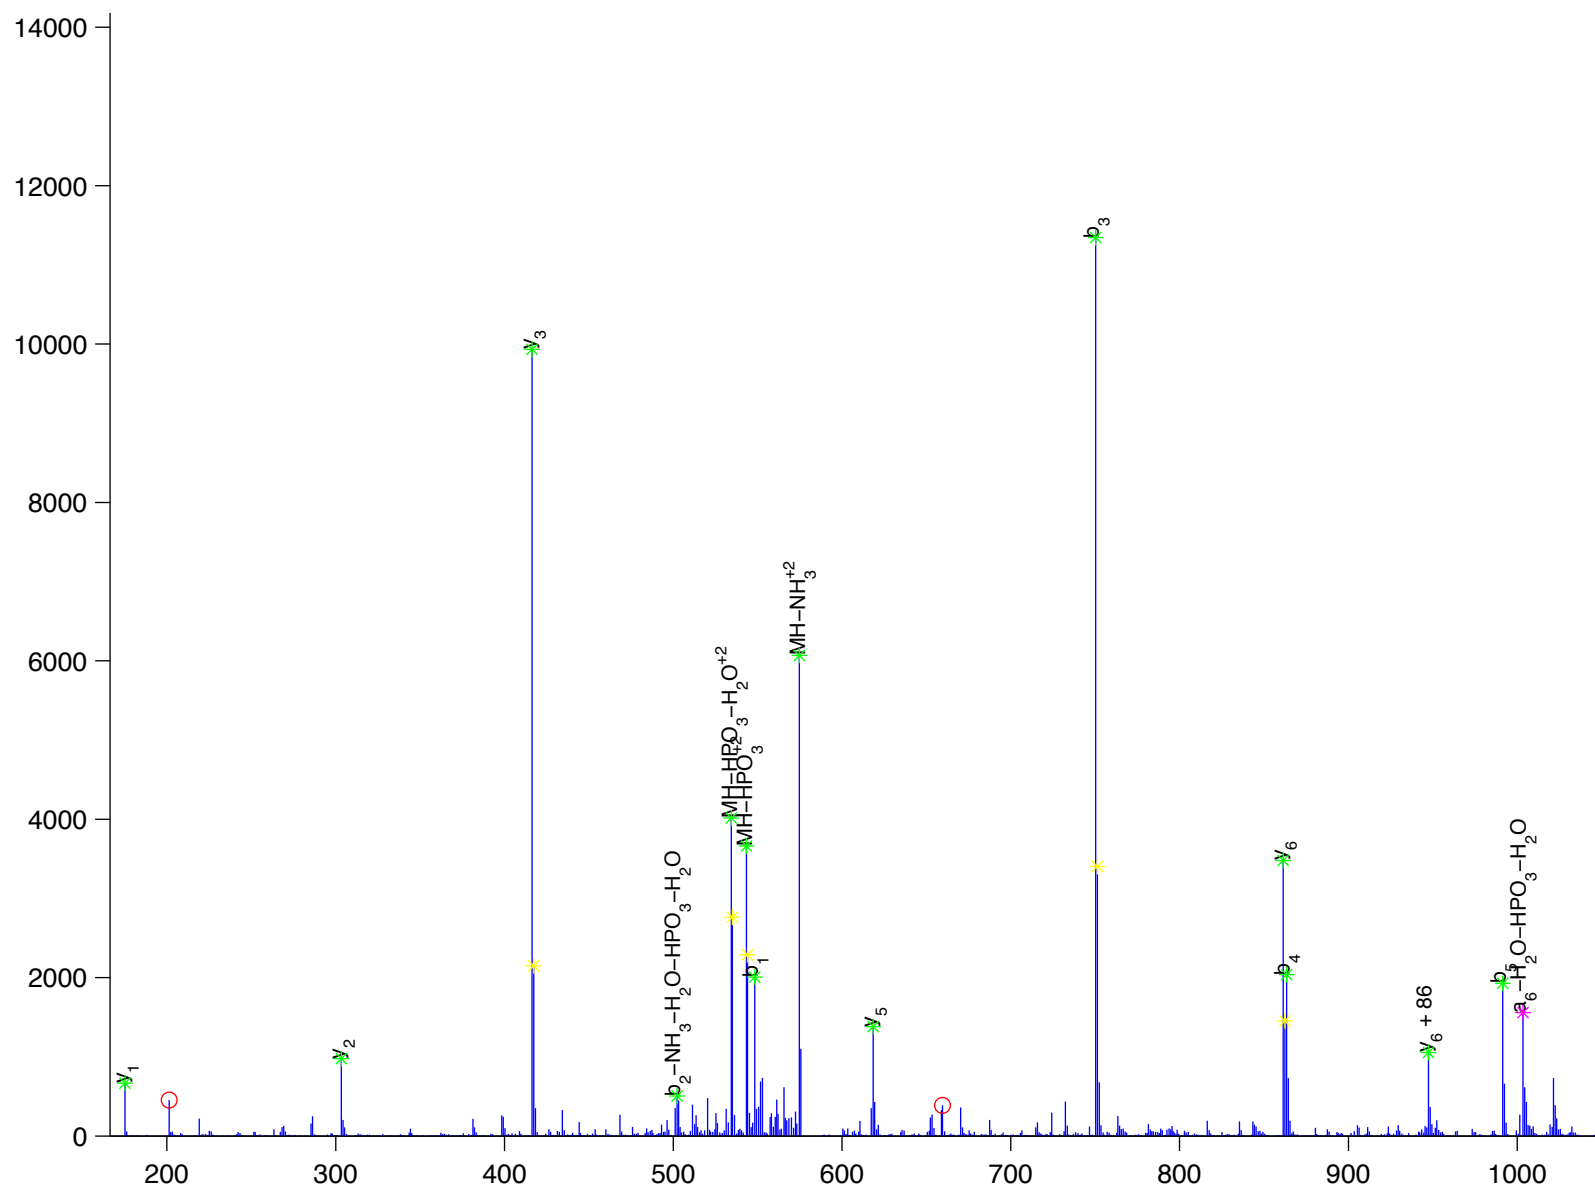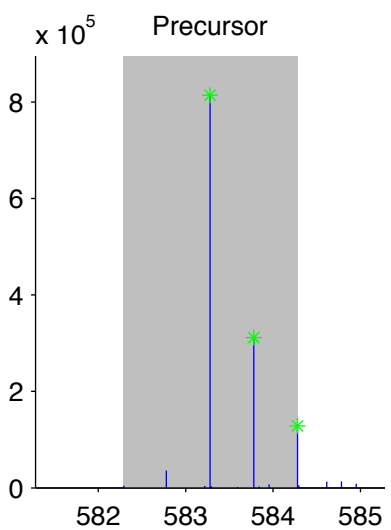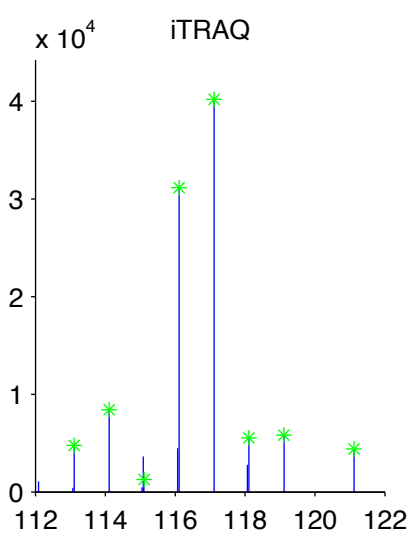

V [ D ] S [ D ] N [ A ] y [ I ] G [ V ] T [ Y ] K

platelet-derived growth factor receptor alpha precursor [Homo sapiens]

Charge State: +3

Scan Number: 6349

File Name: HJ050711\_GBMxeno\_bio1\_E\_HANNAH.raw

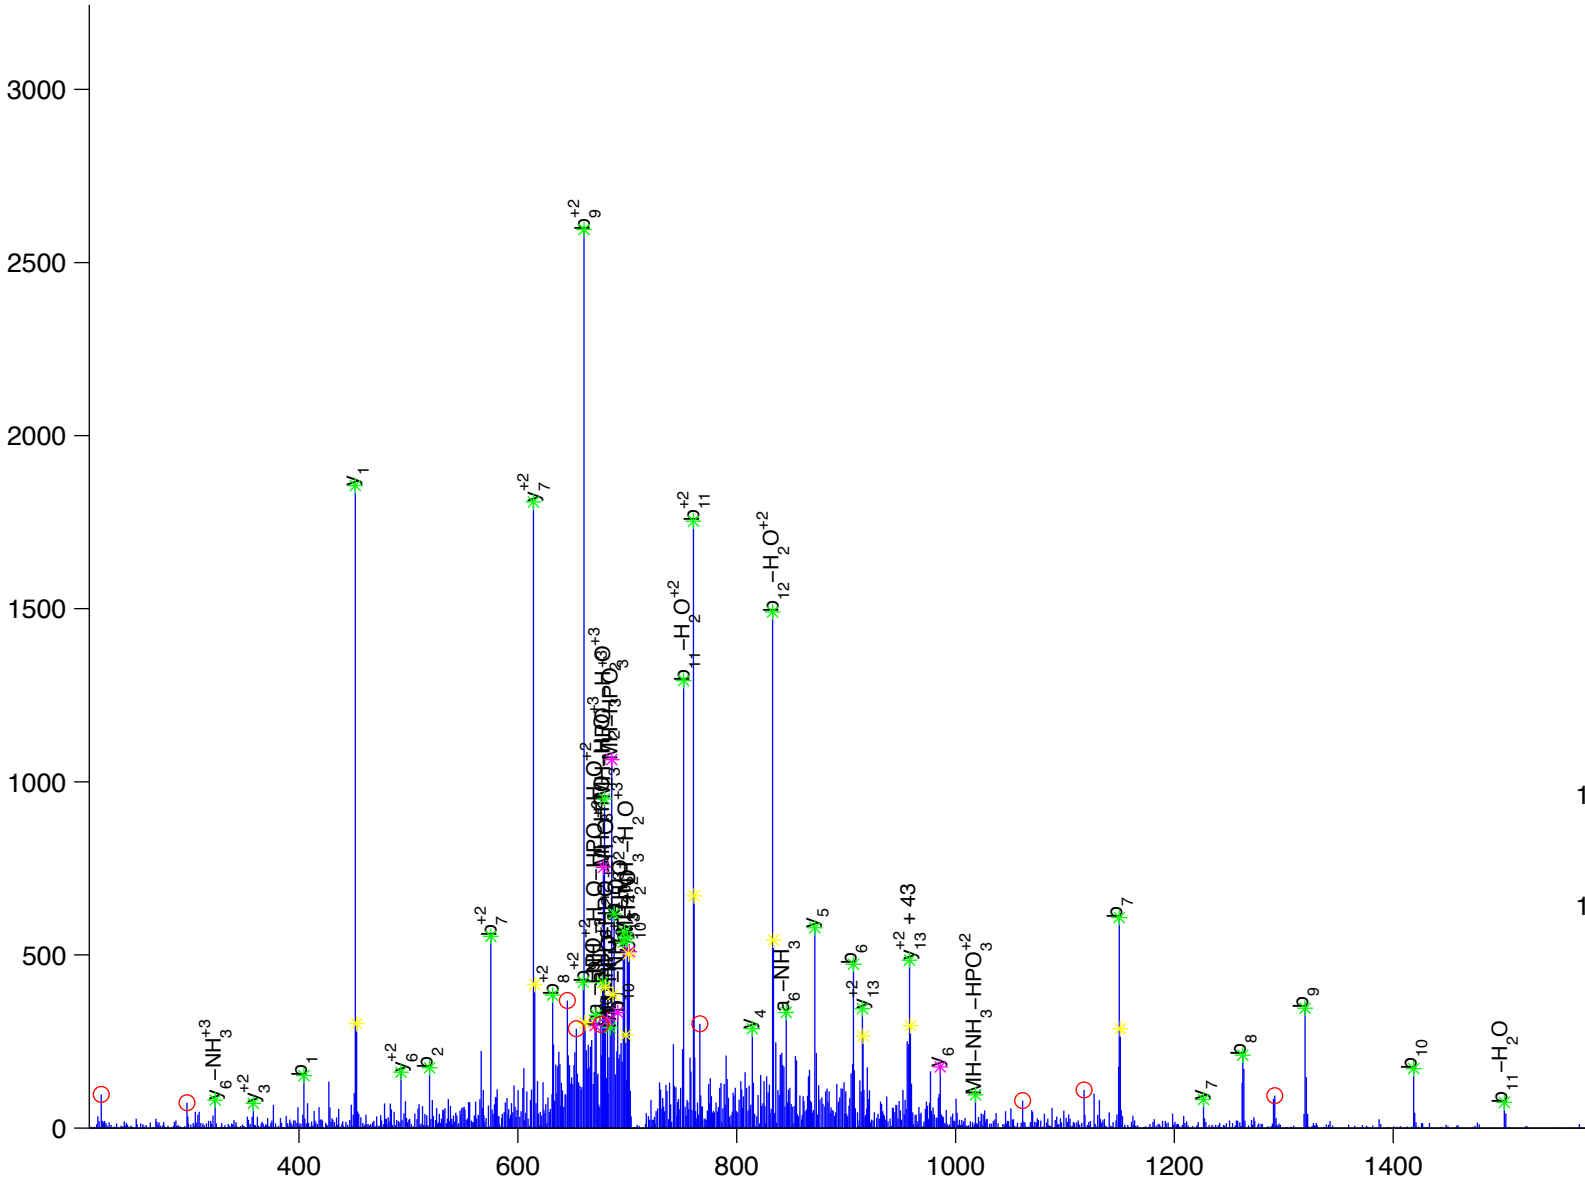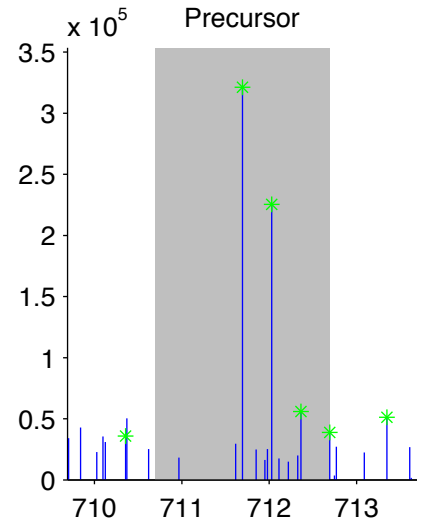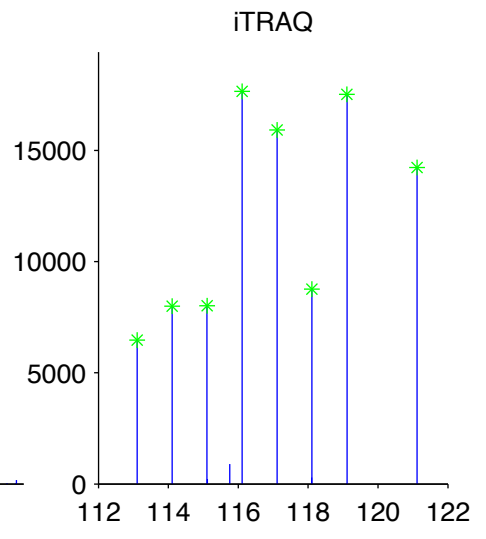

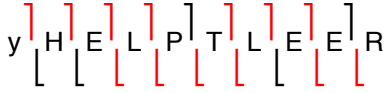

poliovirus receptor related 2 isoform delta precursor [Homo sapiens]

Charge State: +3

Scan Number: 6040

File Name: HJ050711\_GBMxeno\_bio1\_E\_HANNAH.raw

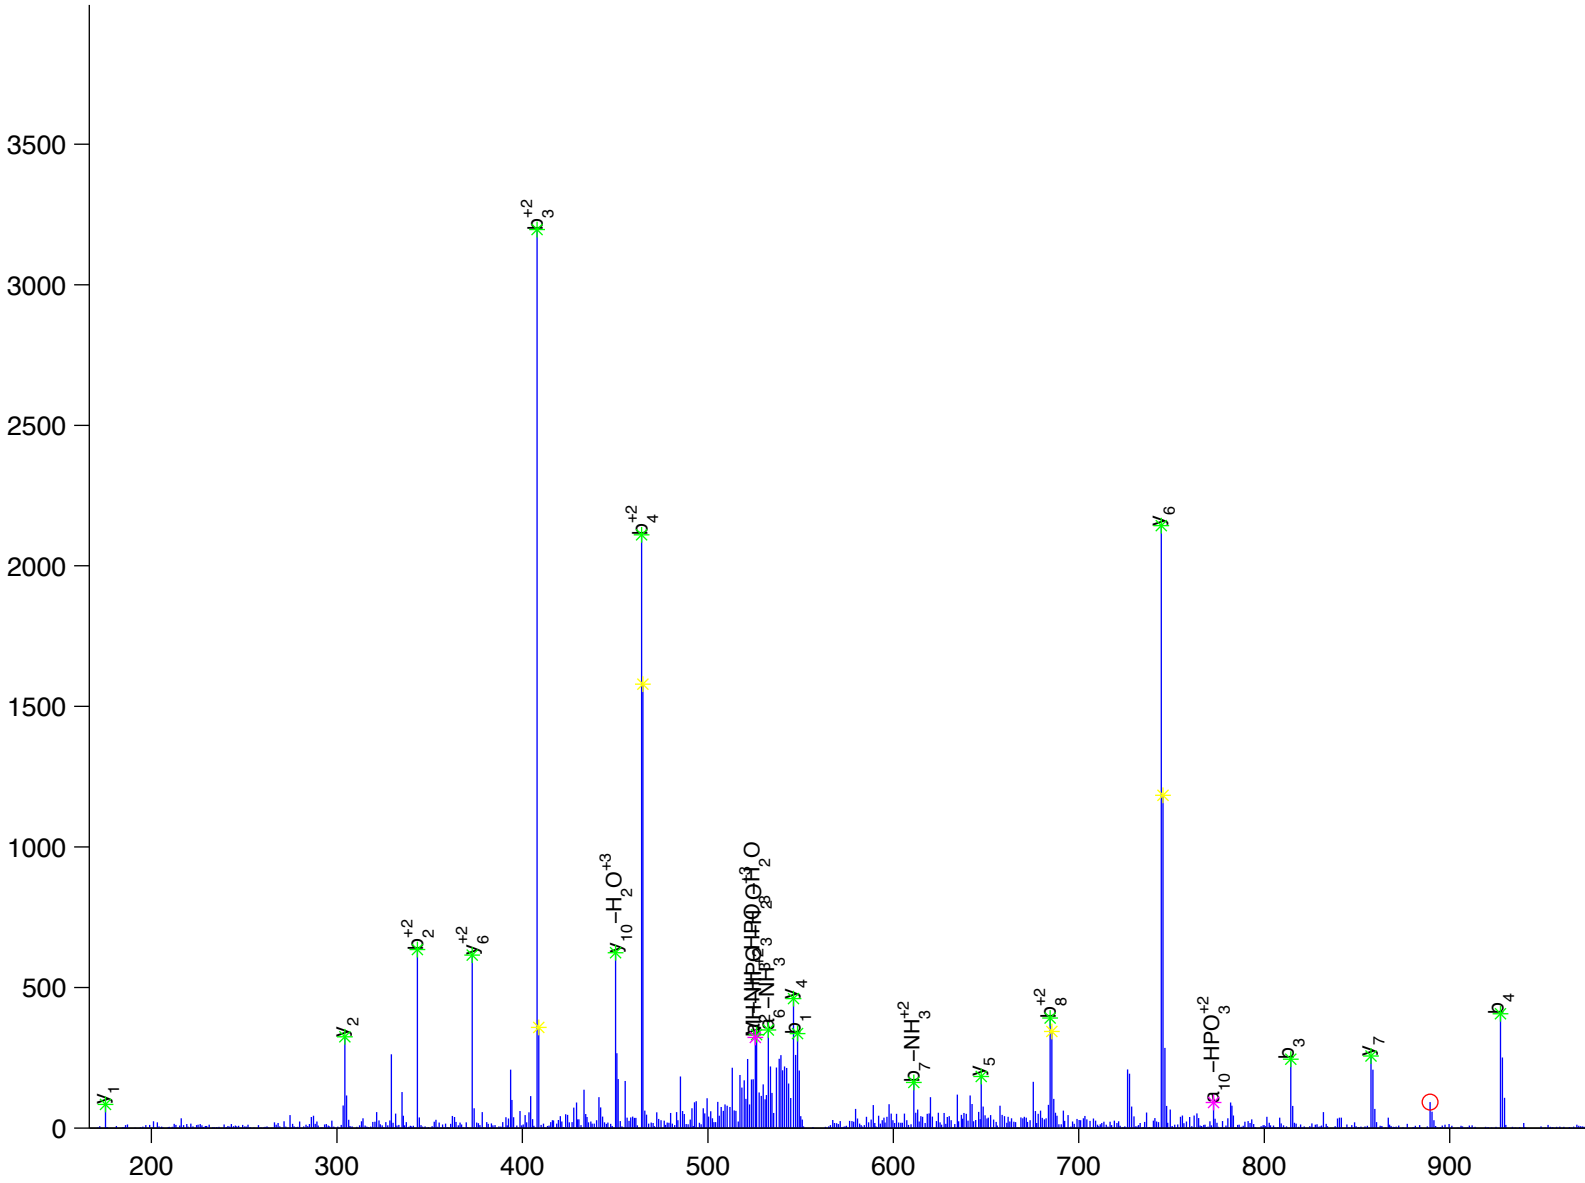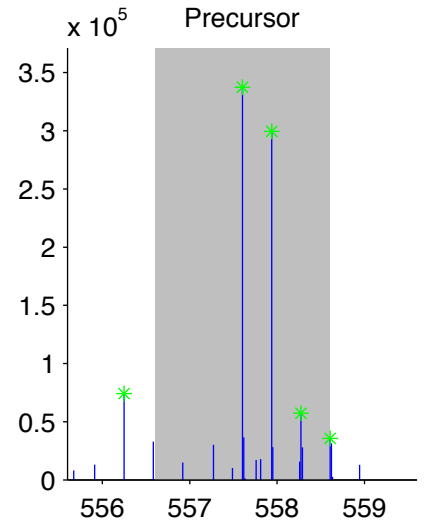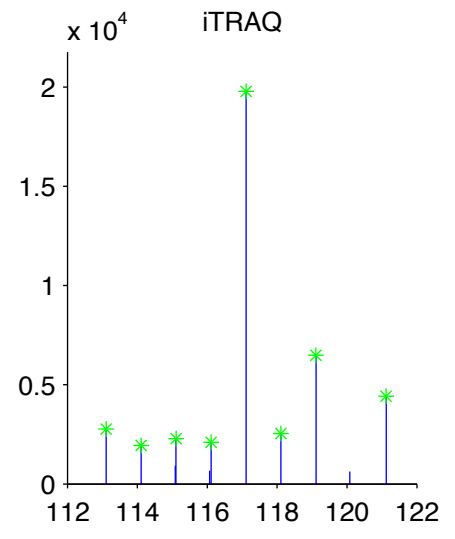



E [ A ] E [ y ] F [ E ] L [ P ] E [ L ] V [ R ]

potassium channel tetramerisation domain containing 12 [Homo sapiens]

Charge State: +2

Scan Number: 9516

File Name: HJ050711\_GBMxeno\_bio1\_E\_HANNAH.raw

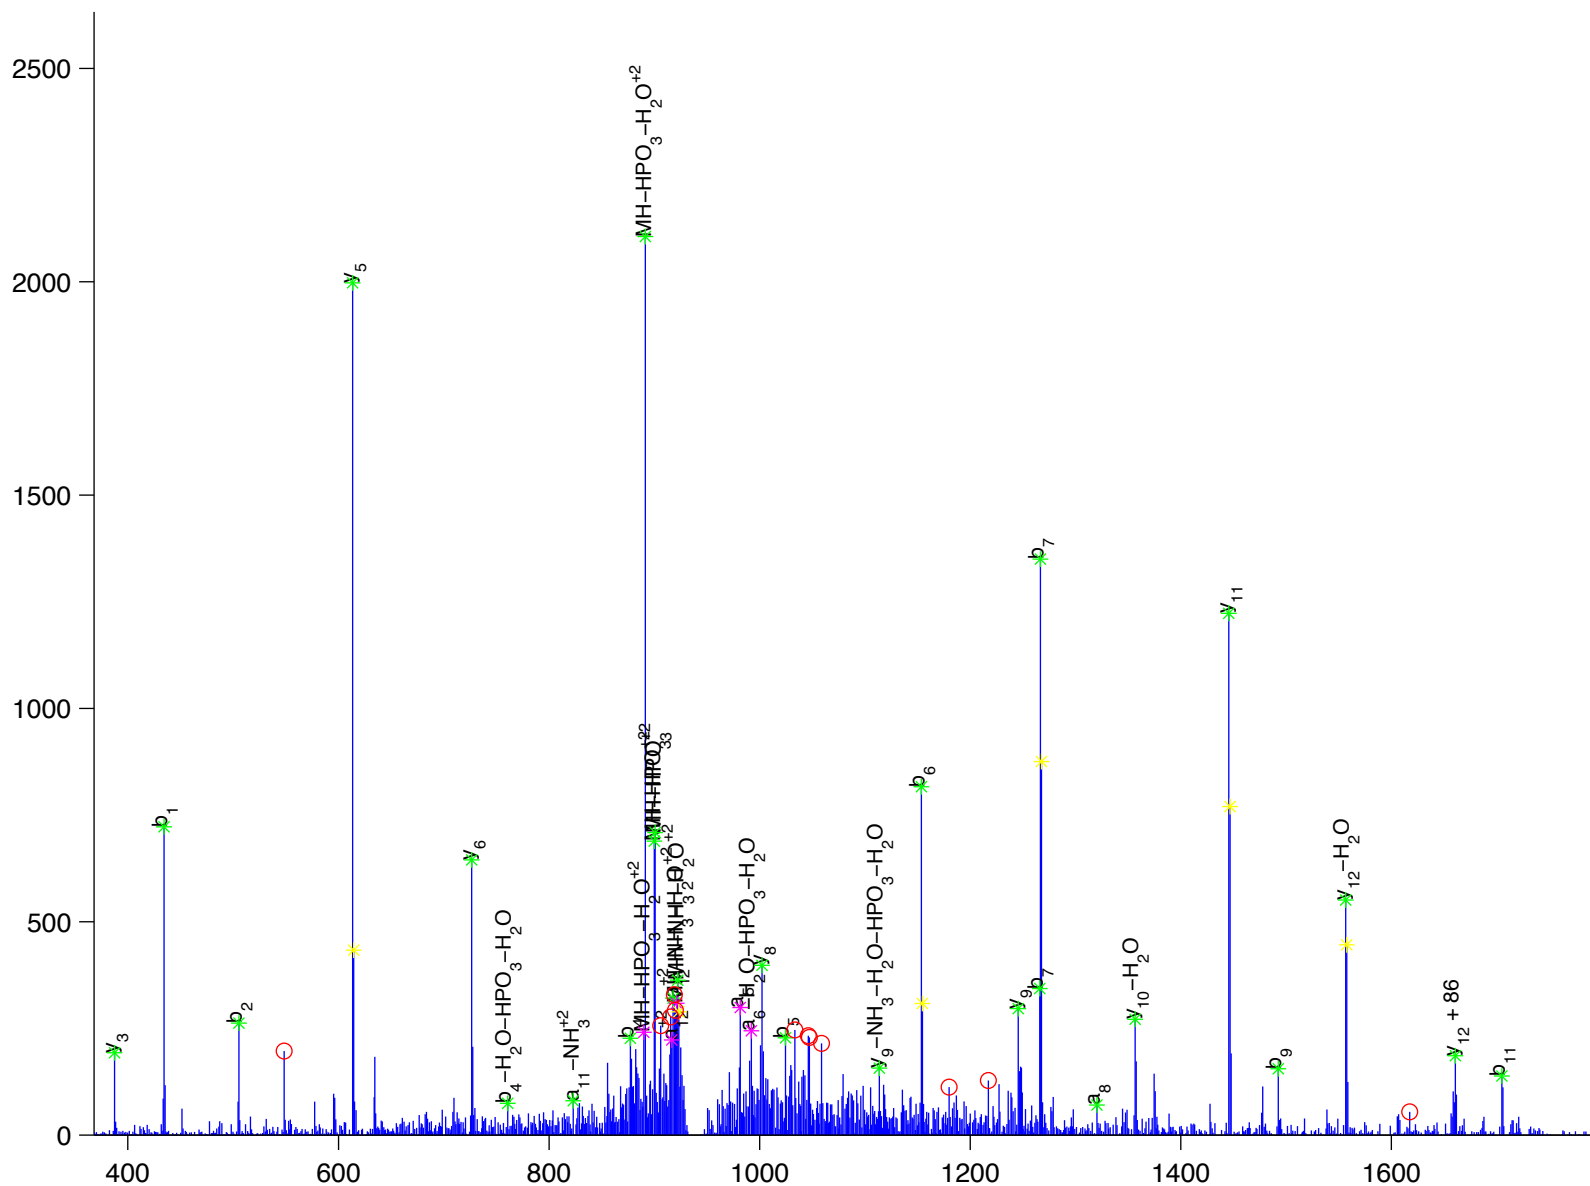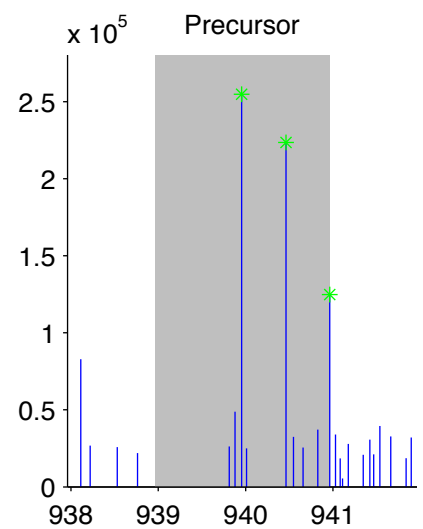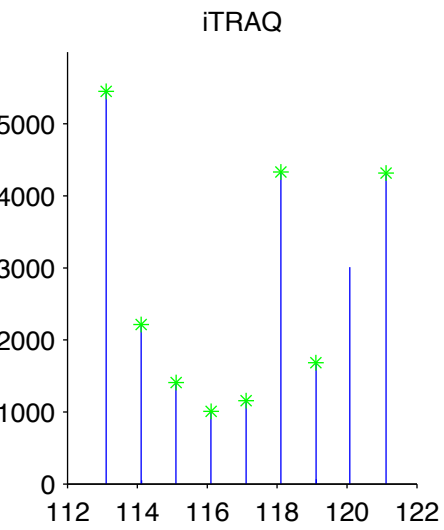

E [ A ] [ T ] [ Q ] [ P ] [ E ] [ P ] [ I ] [ y ] [ A ] [ E ] [ S ] [ T ] [ K ] [ R ]

pragmin [Homo sapiens]

Charge State: +3

Scan Number: 4182

File Name: HJ050711\_GBMxeno\_bio1\_E\_HANNAH.raw

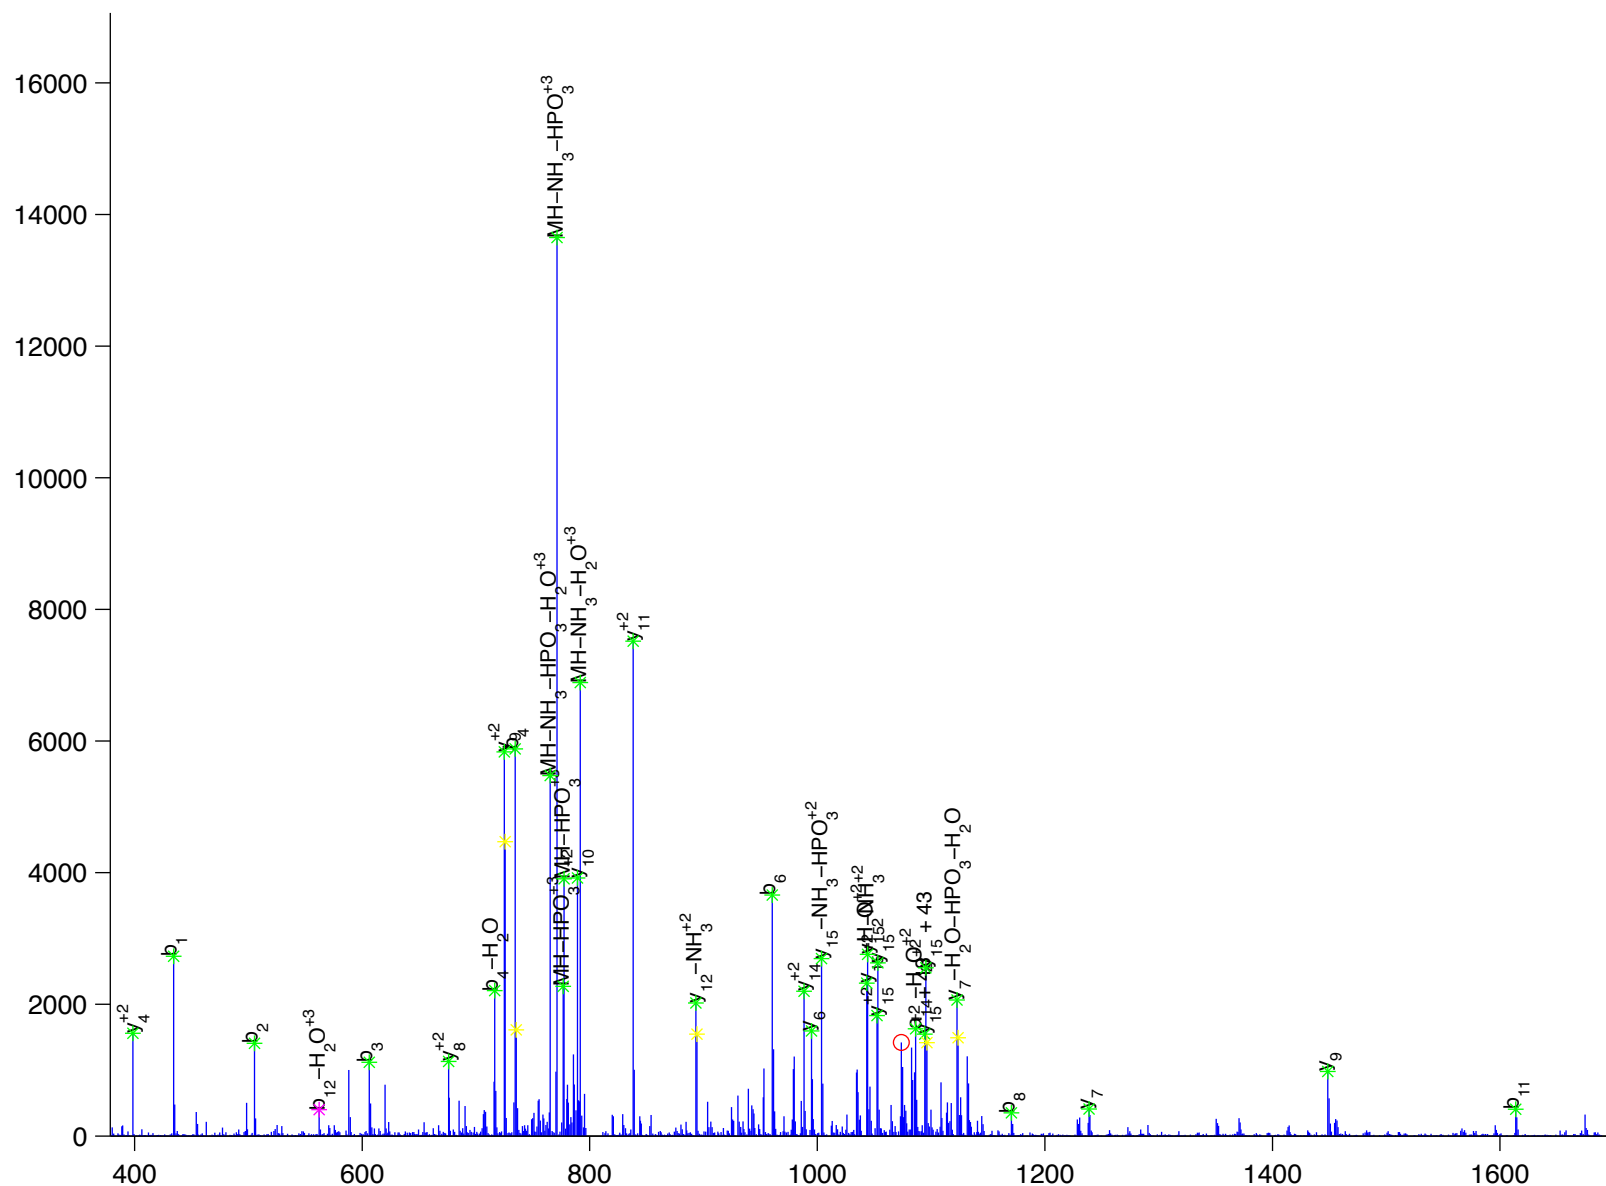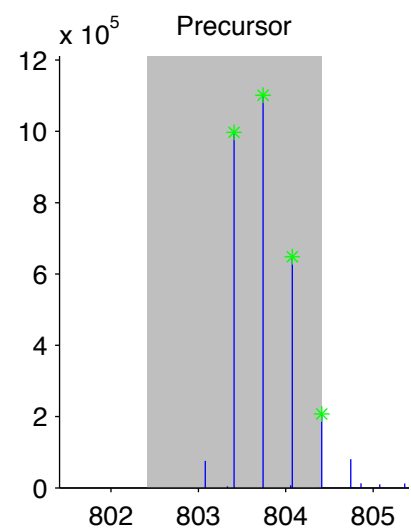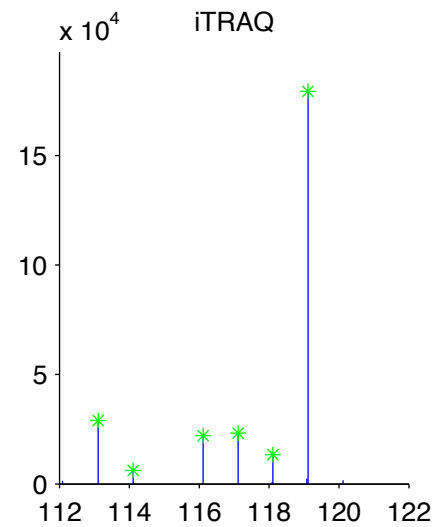

E [ A ] T [ Q ] P [ E ] P [ I ] y [ A ] E [ S ] T [ K ] R

pragmin [Homo sapiens]

Charge State: +3

Scan Number: 4350

File Name: HJ050711\_GBMxeno\_bio1\_E\_HANNAH.raw

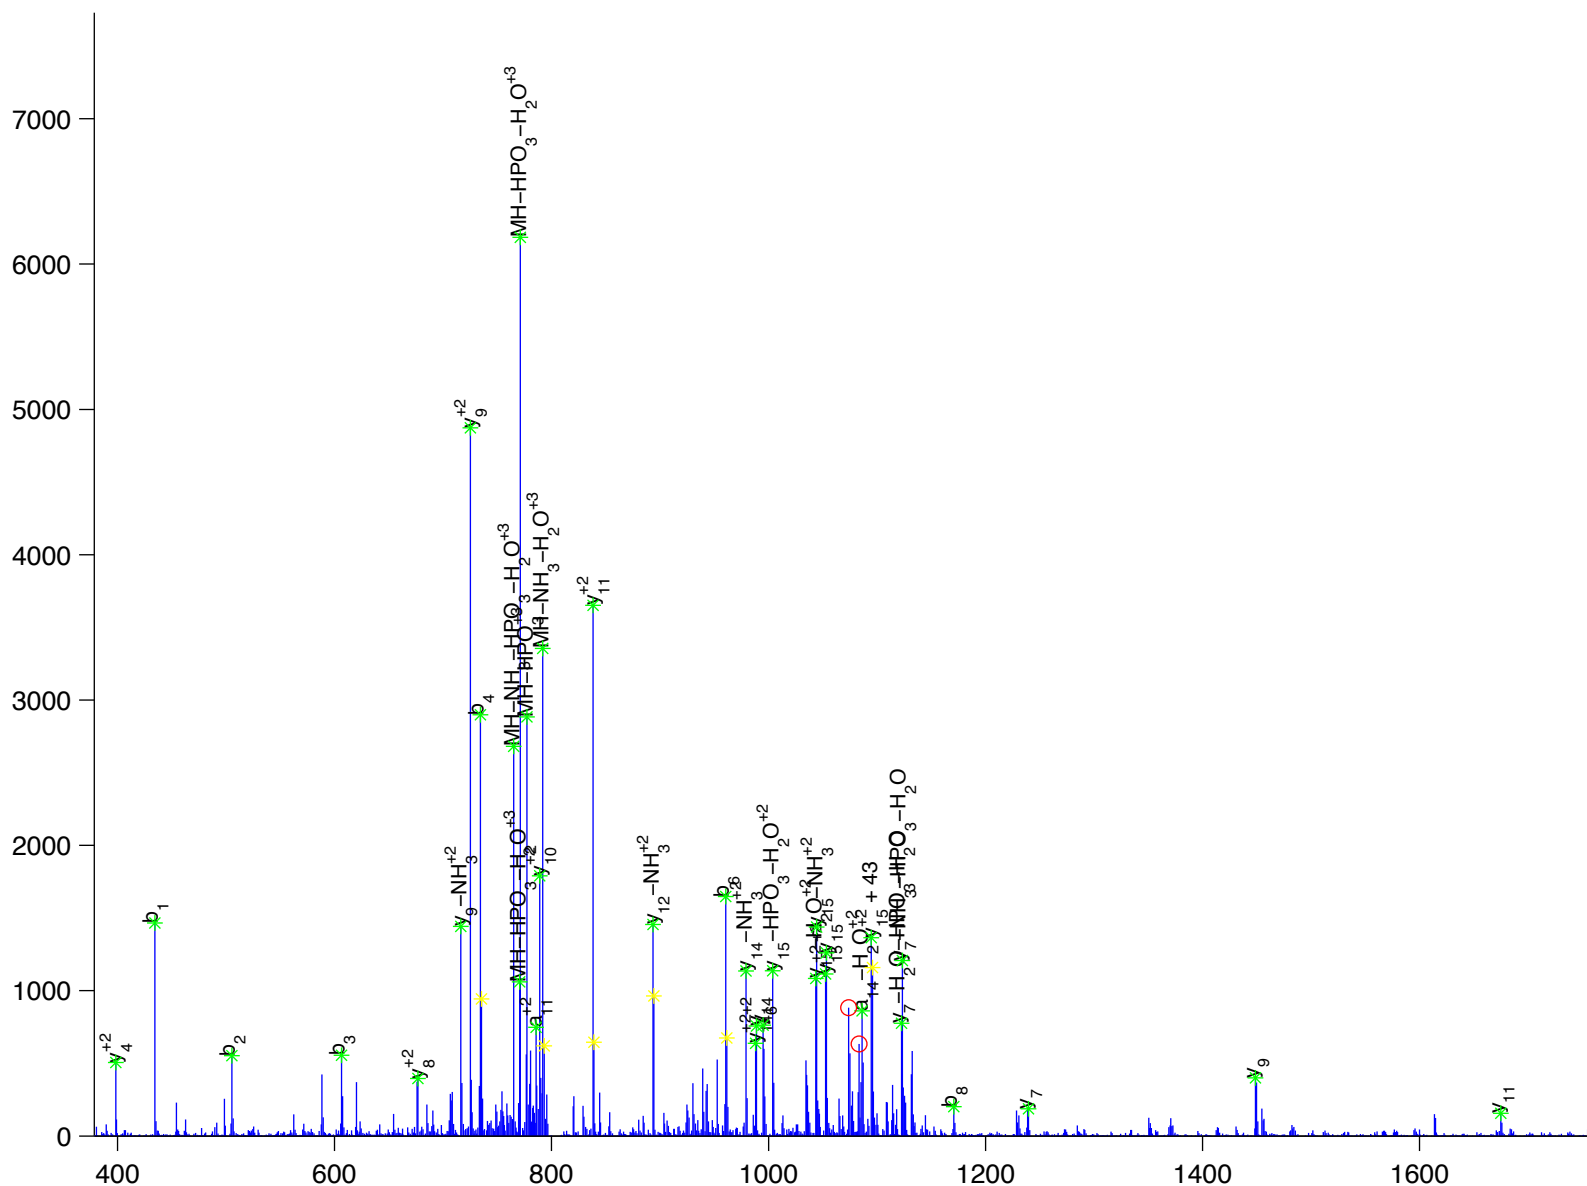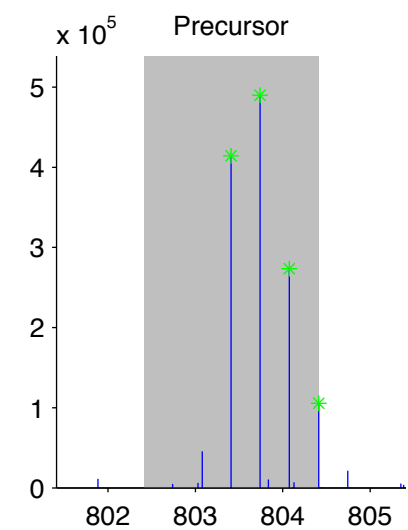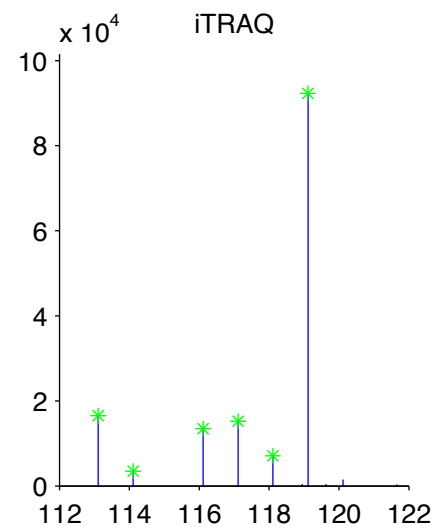

E [A] [T] [Q] [P] [E] [P] [I] [y] [A] [E] [S] [T] [K]

pragmin [Homo sapiens]

Charge State: +3

Scan Number: 4898

File Name: HJ050711\_GBMxeno\_bio1\_E\_HANNAH.raw

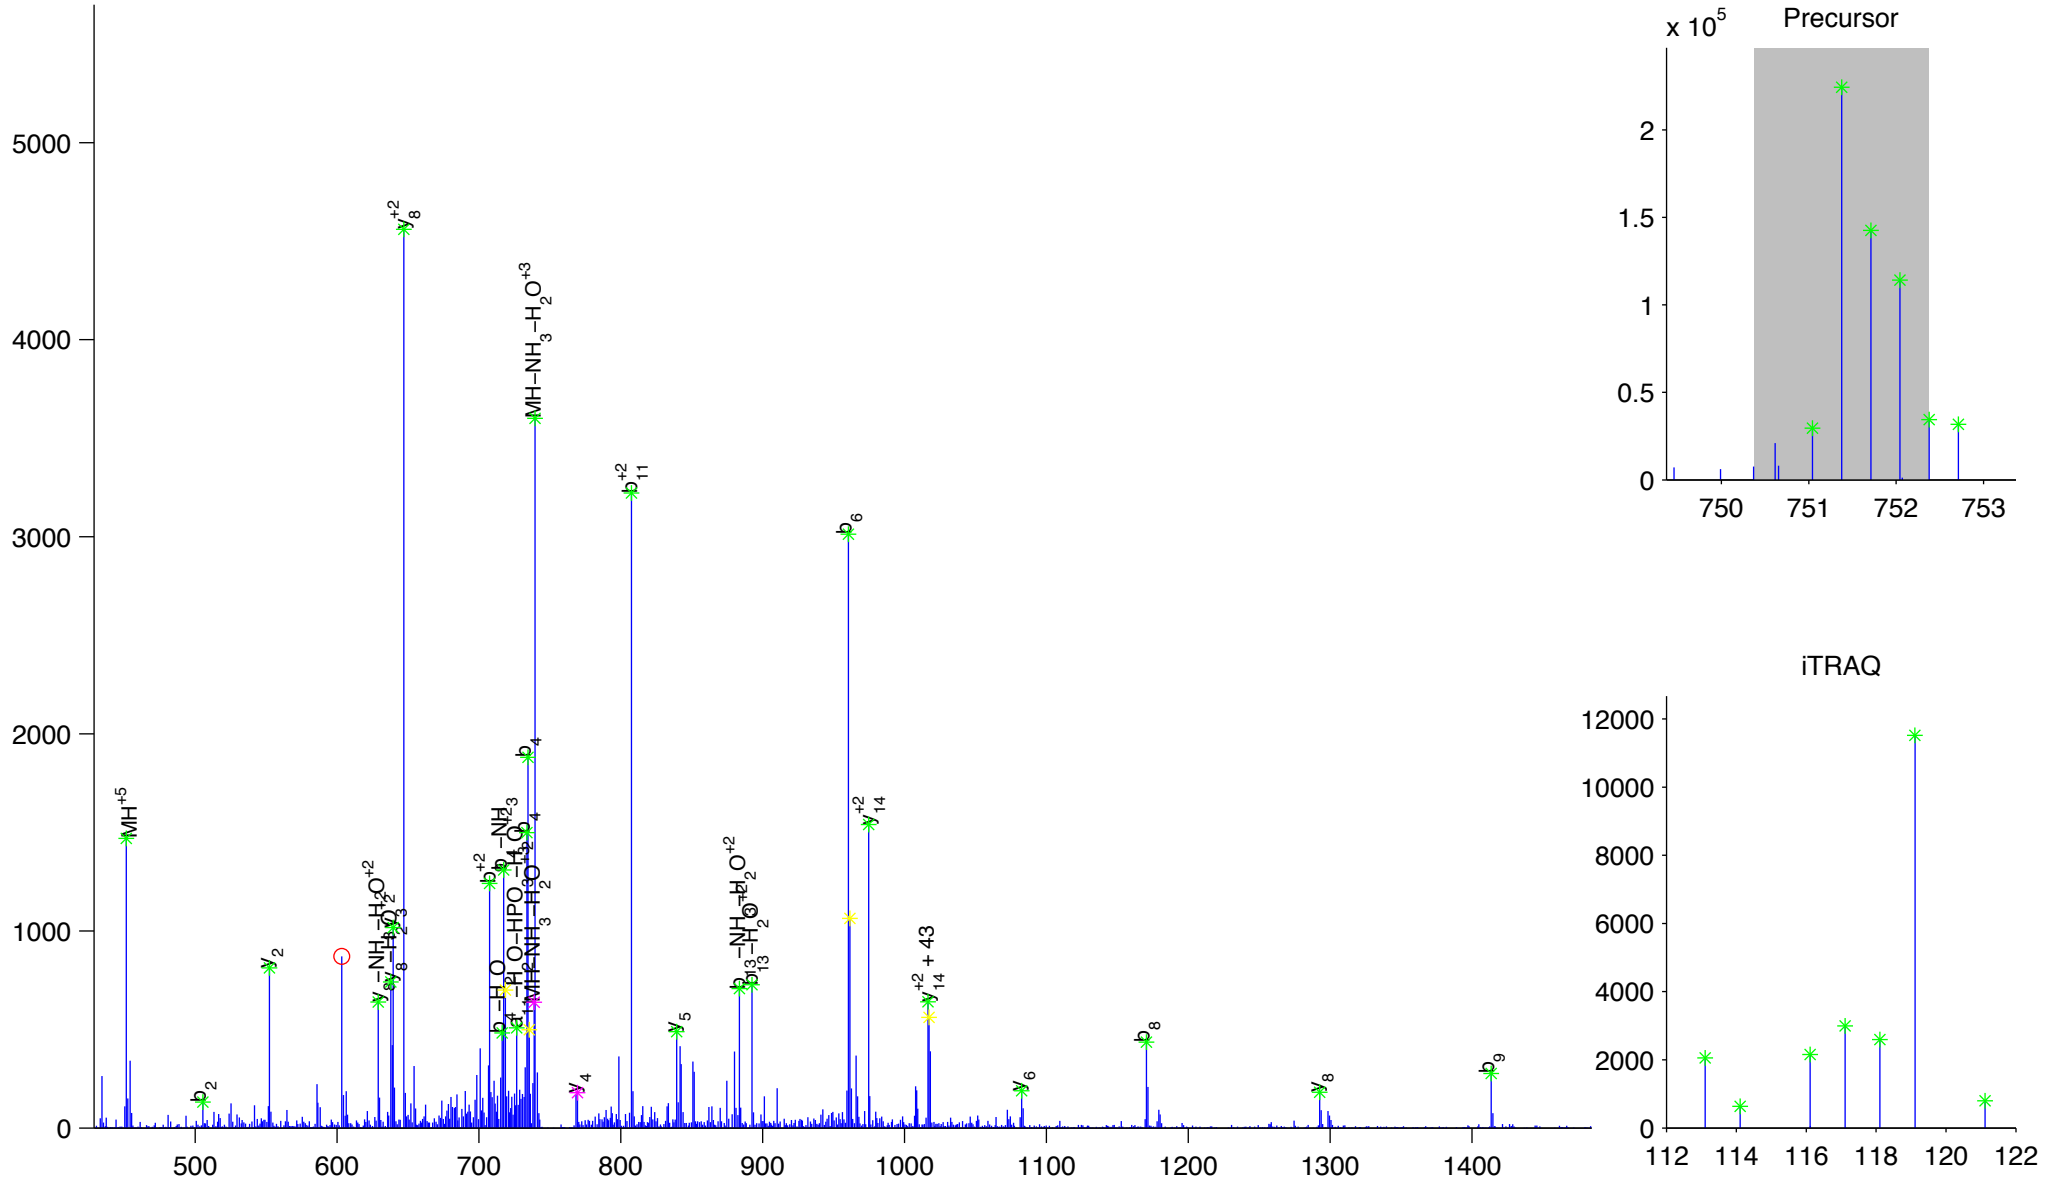

E [ A ] T [ Q ] P [ E ] P [ I ] y [ A ] E [ S ] T [ K ]

pragmin [Homo sapiens]

Charge State: +2

Scan Number: 4948

File Name: HJ050711\_GBMxeno\_bio1\_E\_HANNAH.raw

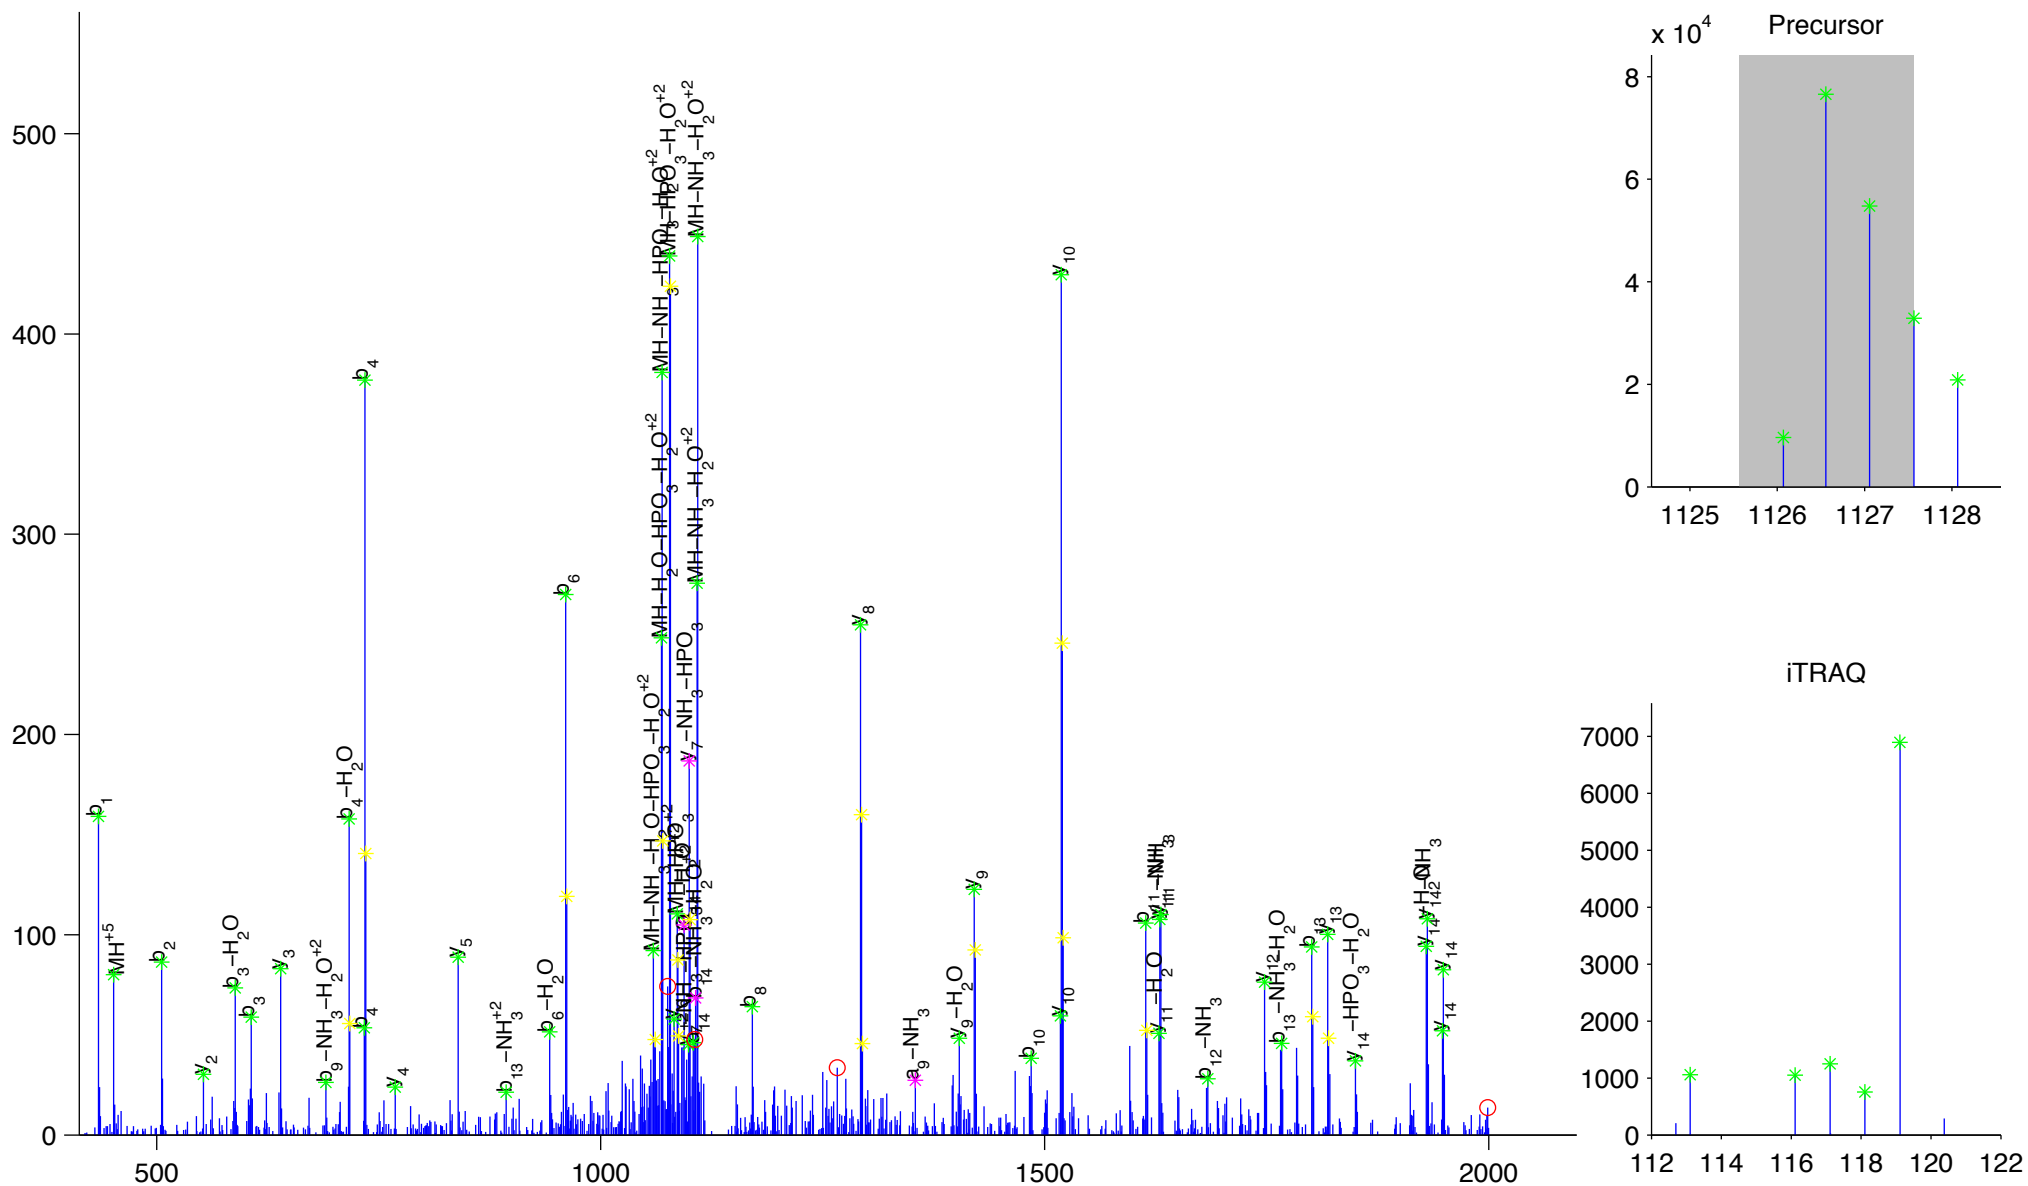

S [ G ] t [ c ] G [ A ] E [ A ] A [ A ] A [ A ] A [ Q ] L [ I ] A [ G ] T [ G ] S [ t ] R

PREDICTED: hypothetical protein [Homo sapiens]

Charge State: +4

Scan Number: 6599

File Name: HJ050711\_GBMxeno\_bio1\_E\_HANNAH.raw

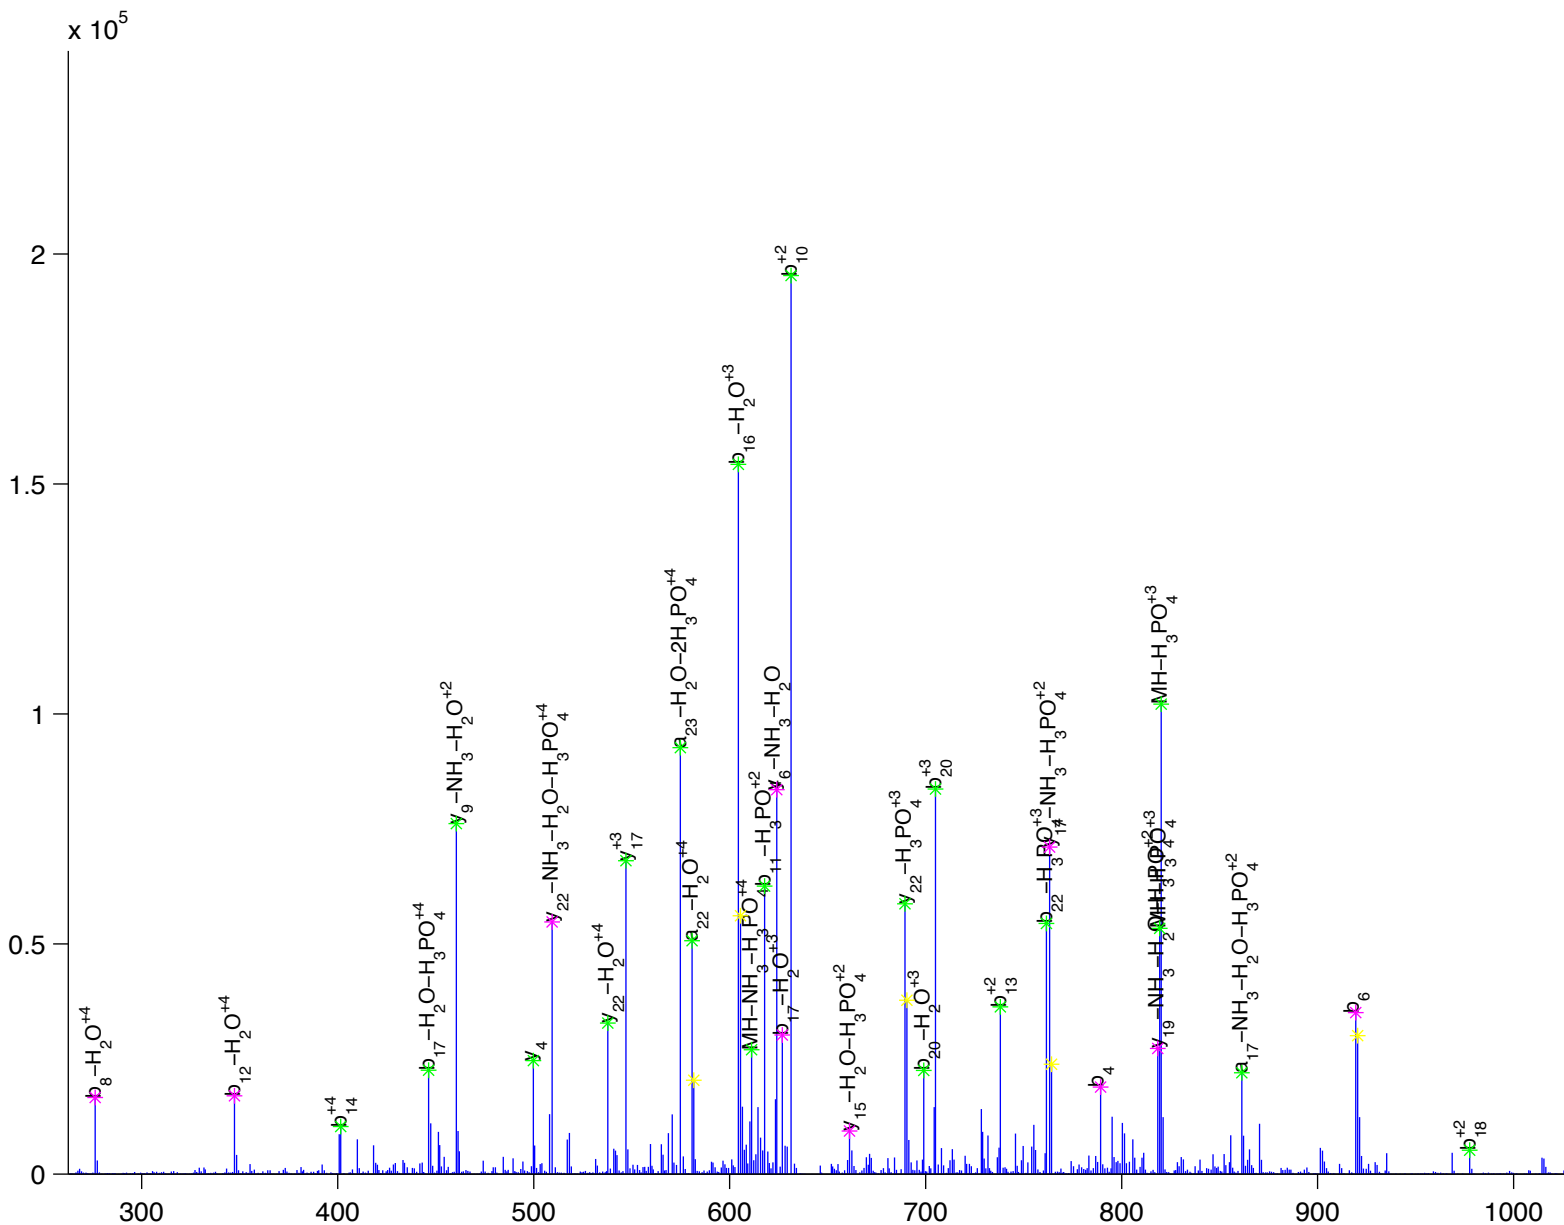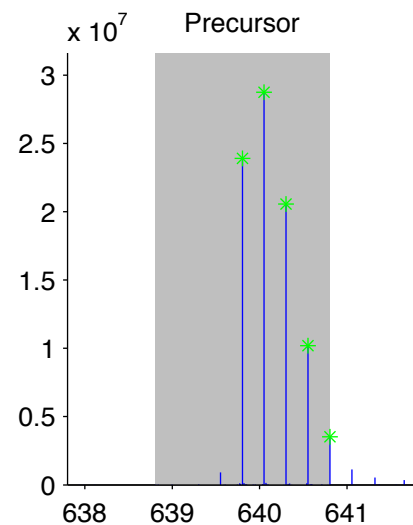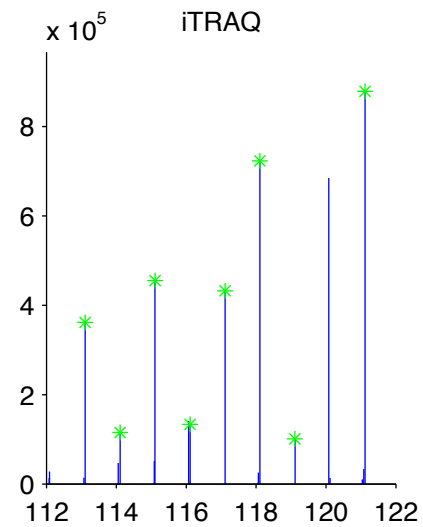

L [ W ] L [ E ] A [ M ] D [ G ] K [ E ] P [ I ] y [ T ] L [ P ] A [ I ] I [ S ] K

PREDICTED: hypothetical protein LOC143872 [Homo sapiens]

Charge State: +3

Scan Number: 9946

File Name: HJ050711\_GBMxeno\_bio1\_E\_HANNAH.raw

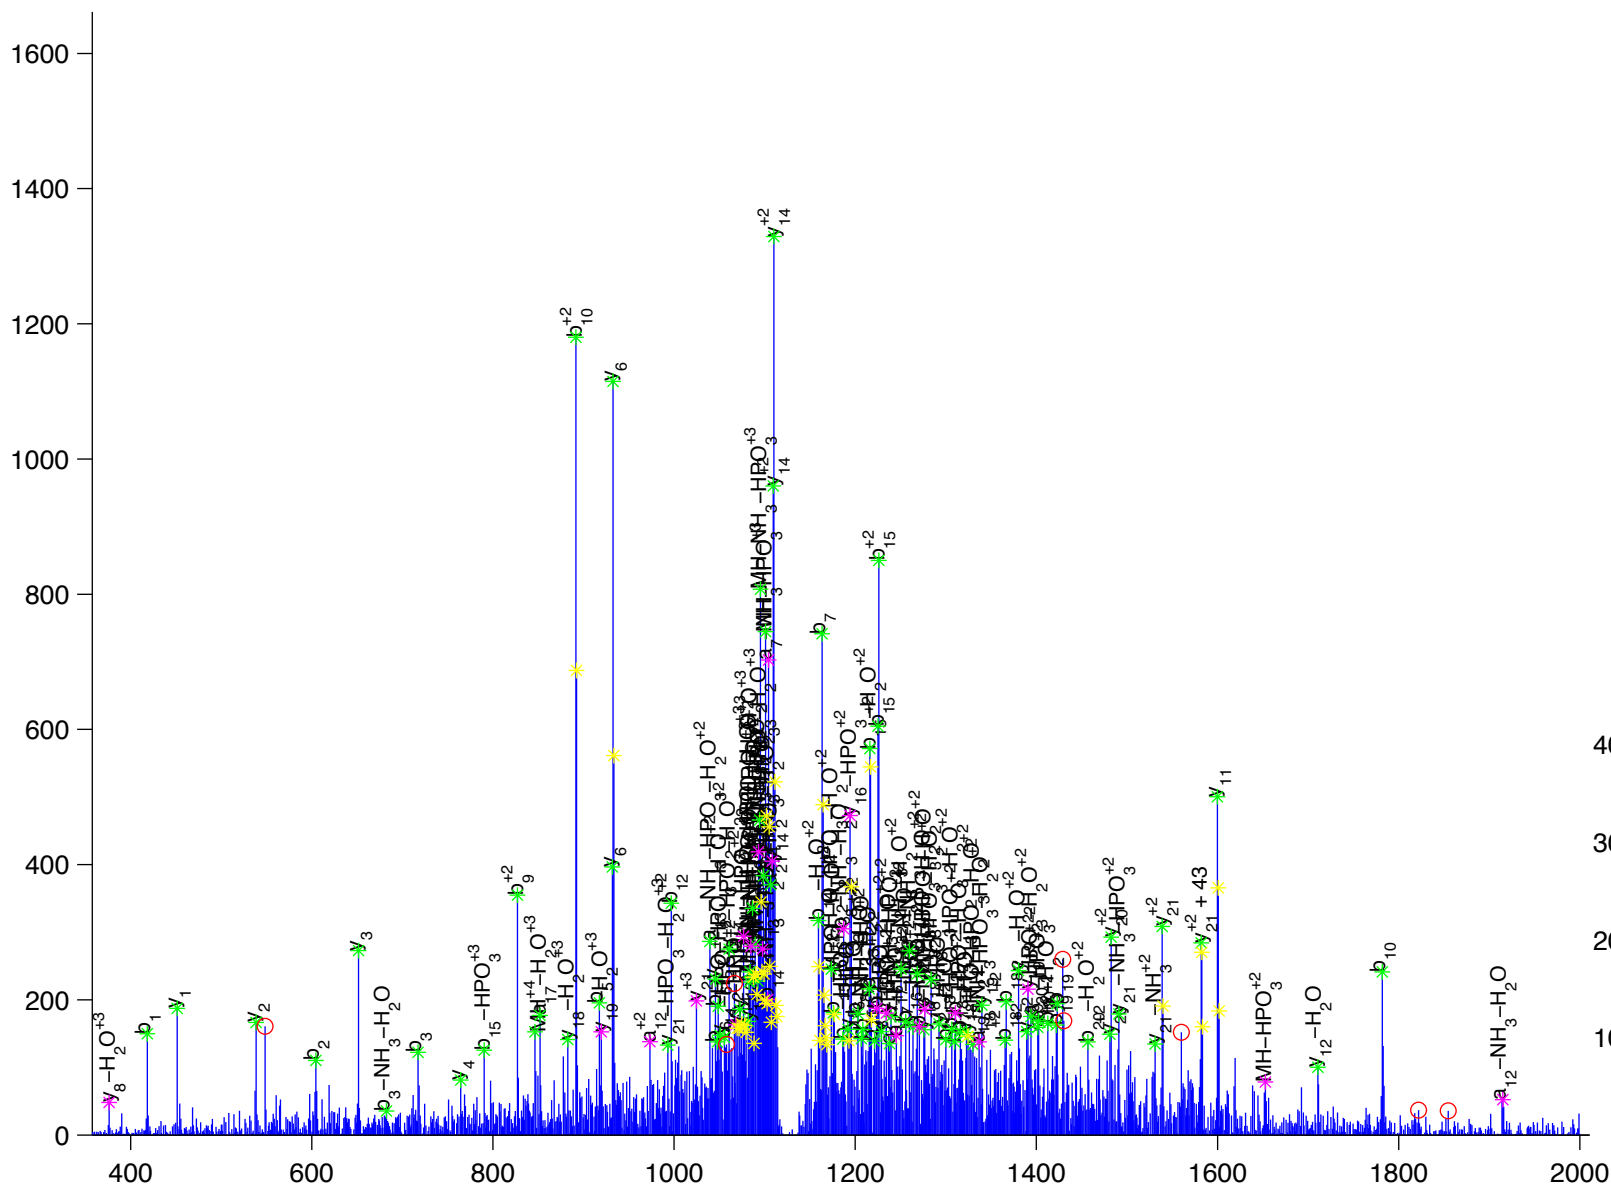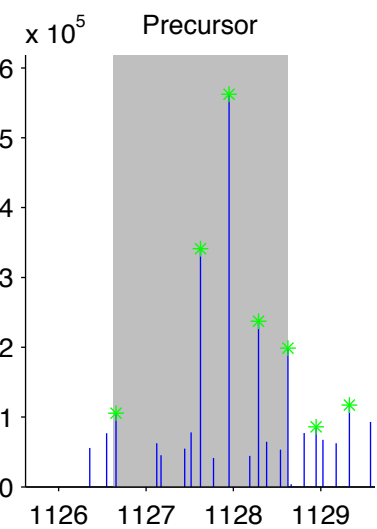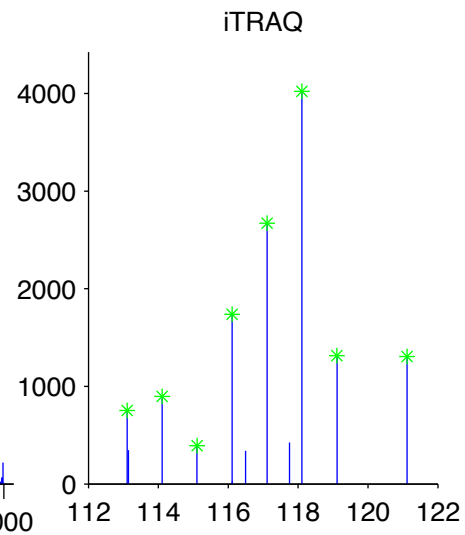

D [ S ] y [ V ] G [ E ] D [ A ] Q [ S ] K

PREDICTED: similar to actin alpha 1 skeletal muscle protein [Homo sapiens]

Charge State: +3

Scan Number: 3636

File Name: HJ050711\_GBMxeno\_bio1\_E\_HANNAH.raw

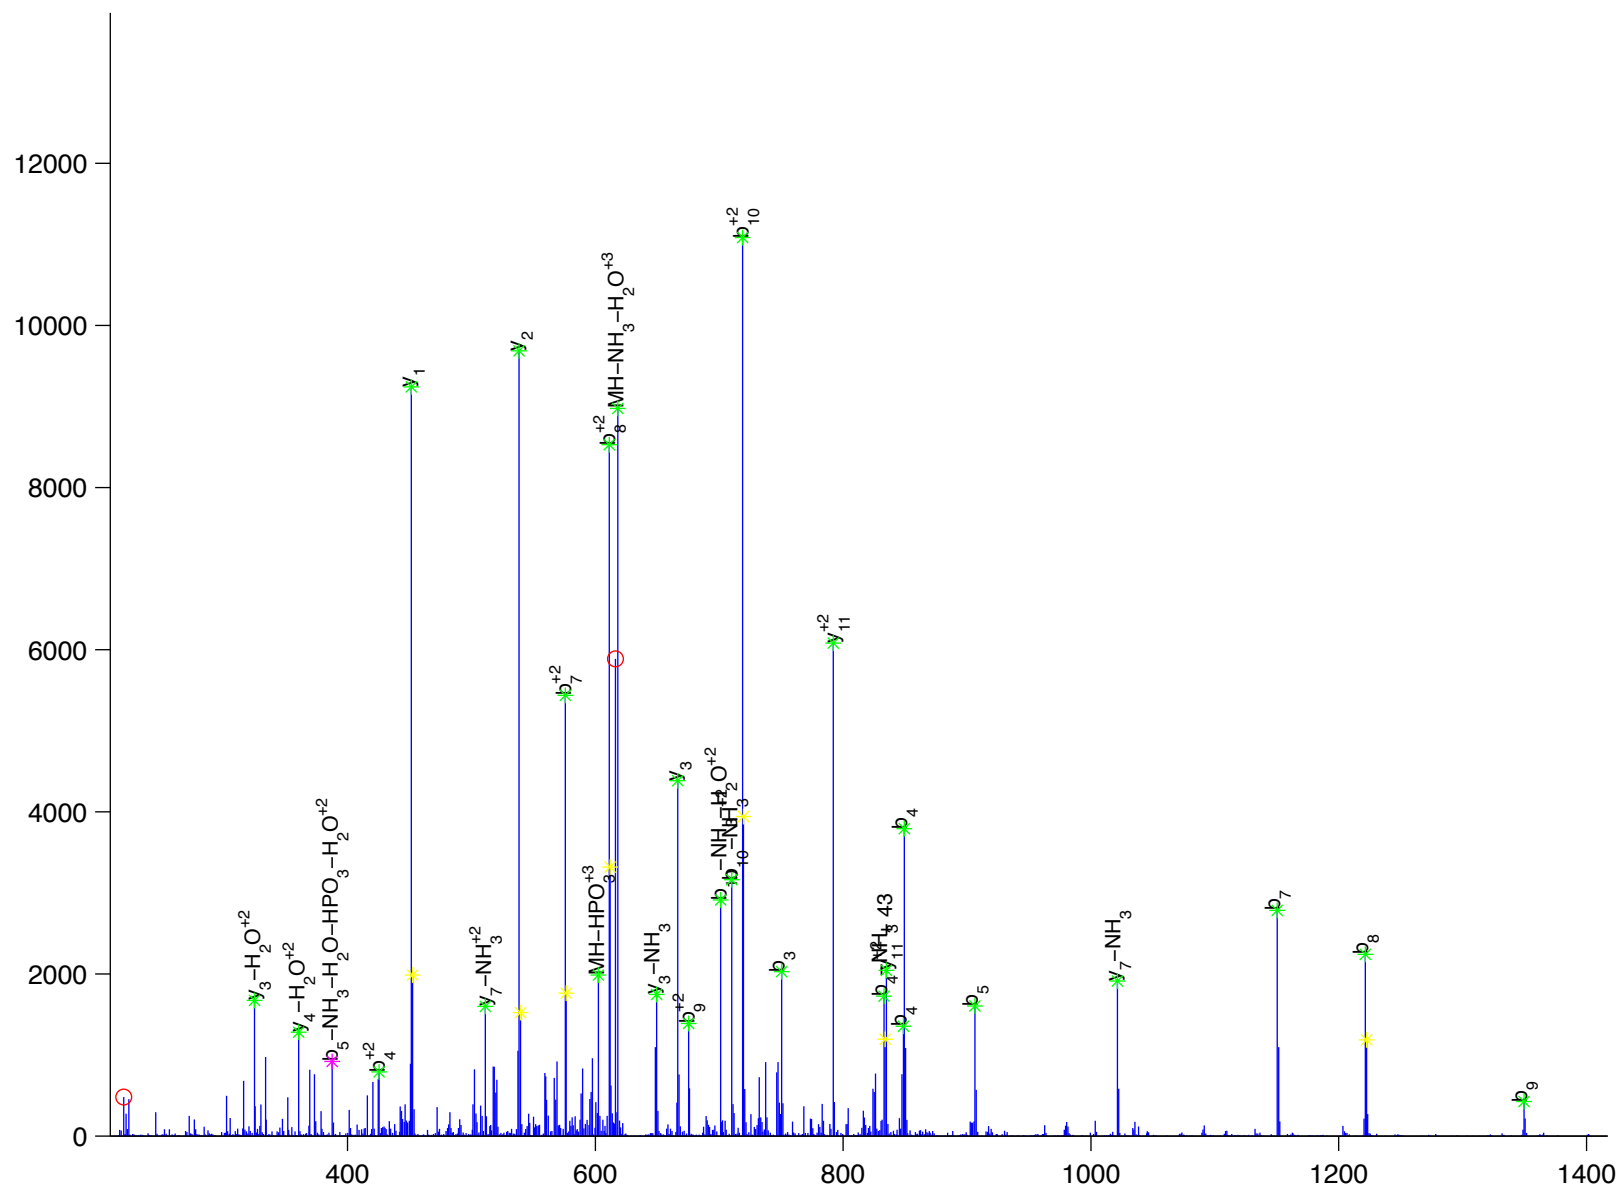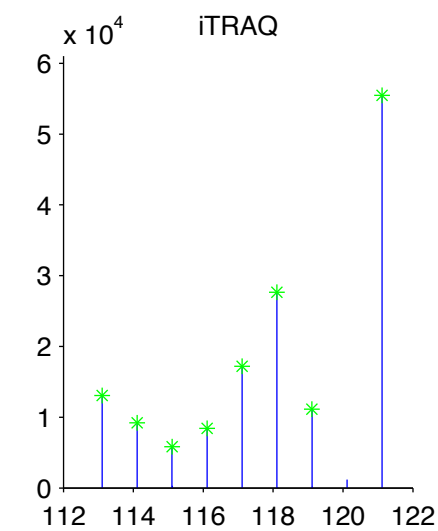



T [ F ] G [ E ] N [ y ] V [ Q ] E [ L ] L [ E ] K

proline synthetase co-transcribed homolog [Homo sapiens]

Charge State: +3

Scan Number: 9495

File Name: HJ050711\_GBMxeno\_bio1\_E\_HANNAH.raw

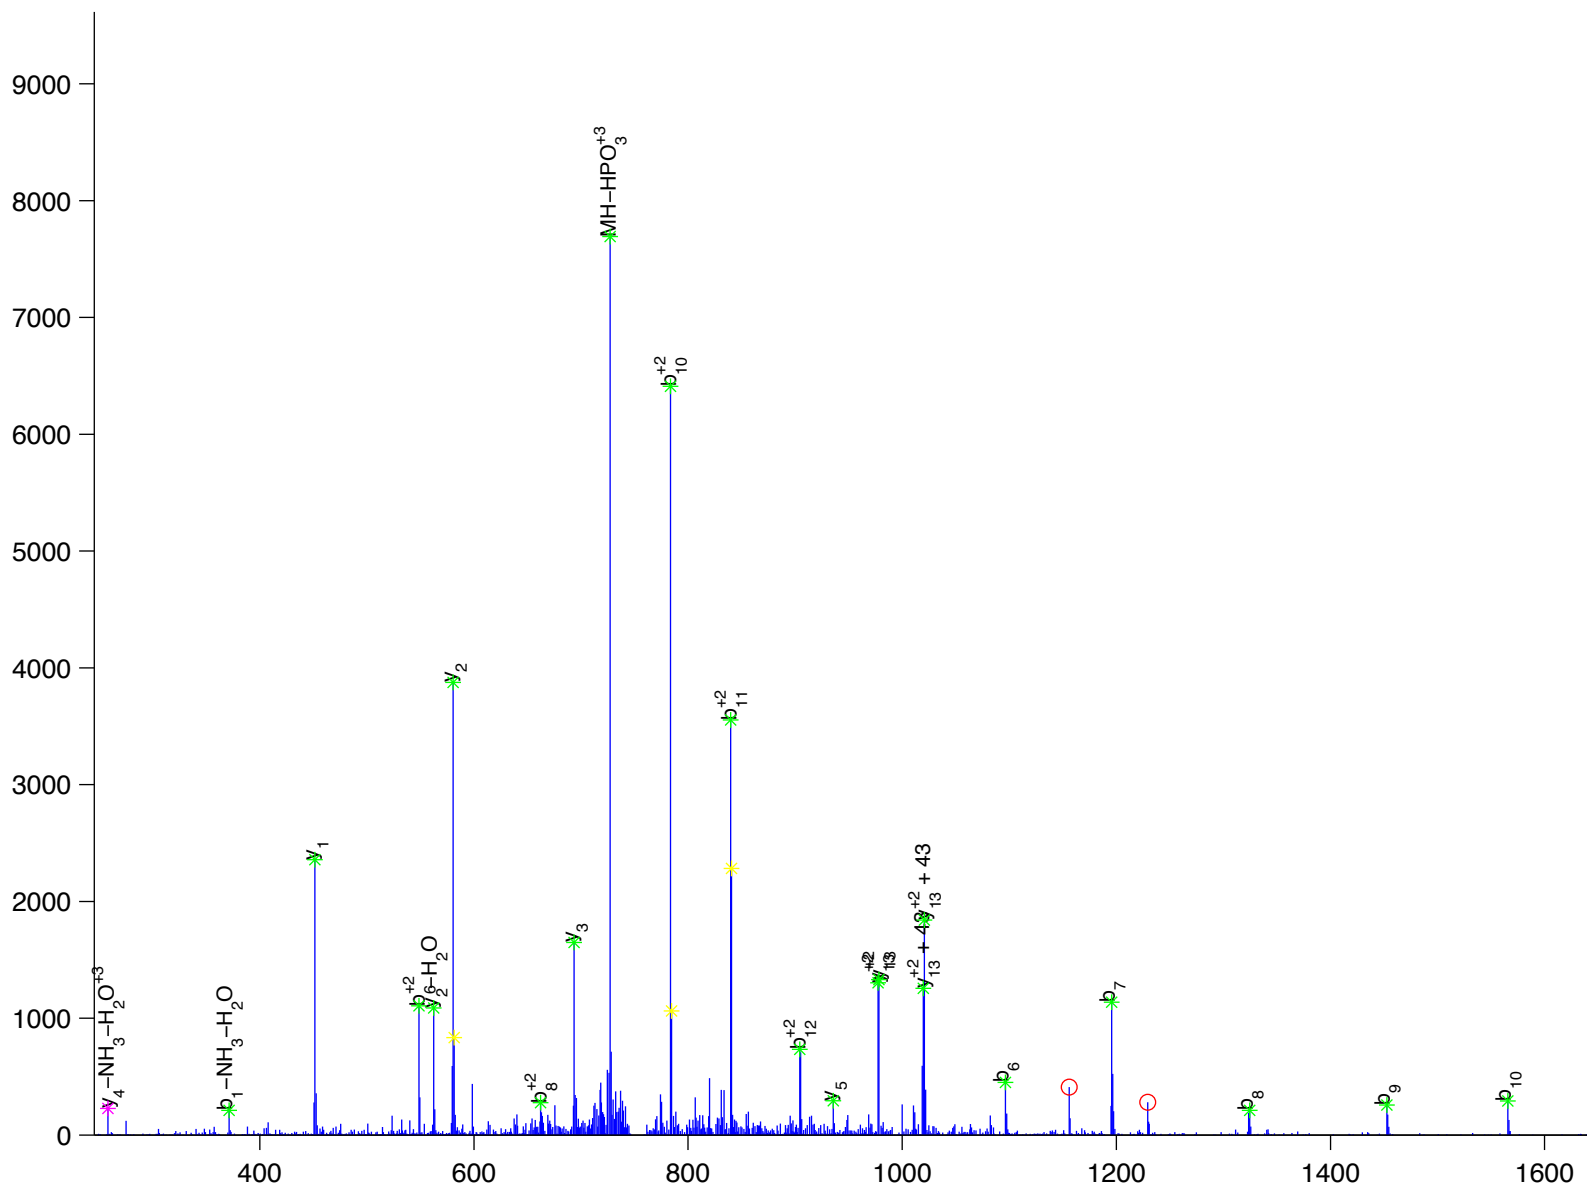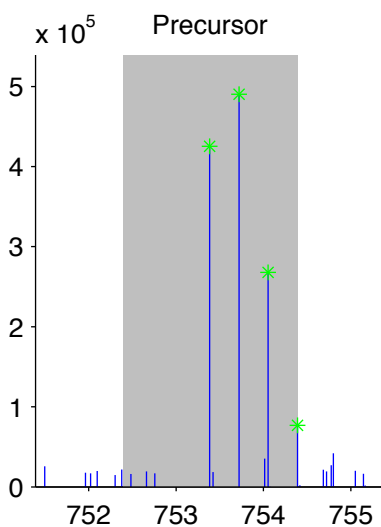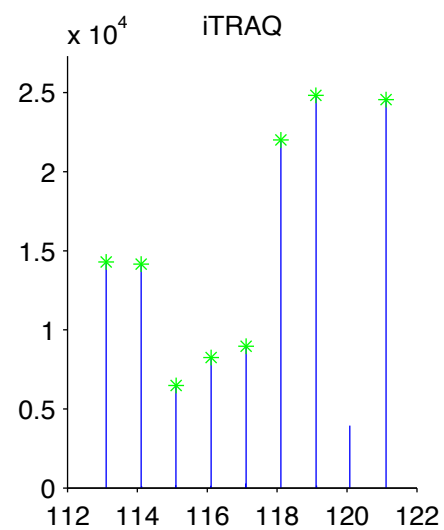

P [ D ] y [ L ] G [ A ] D [ Q ] R

proteasome 26S ATPase subunit 2 [Homo sapiens]

Charge State: +2

Scan Number: 4627

File Name: HJ050711\_GBMxeno\_bio1\_E\_HANNAH.raw

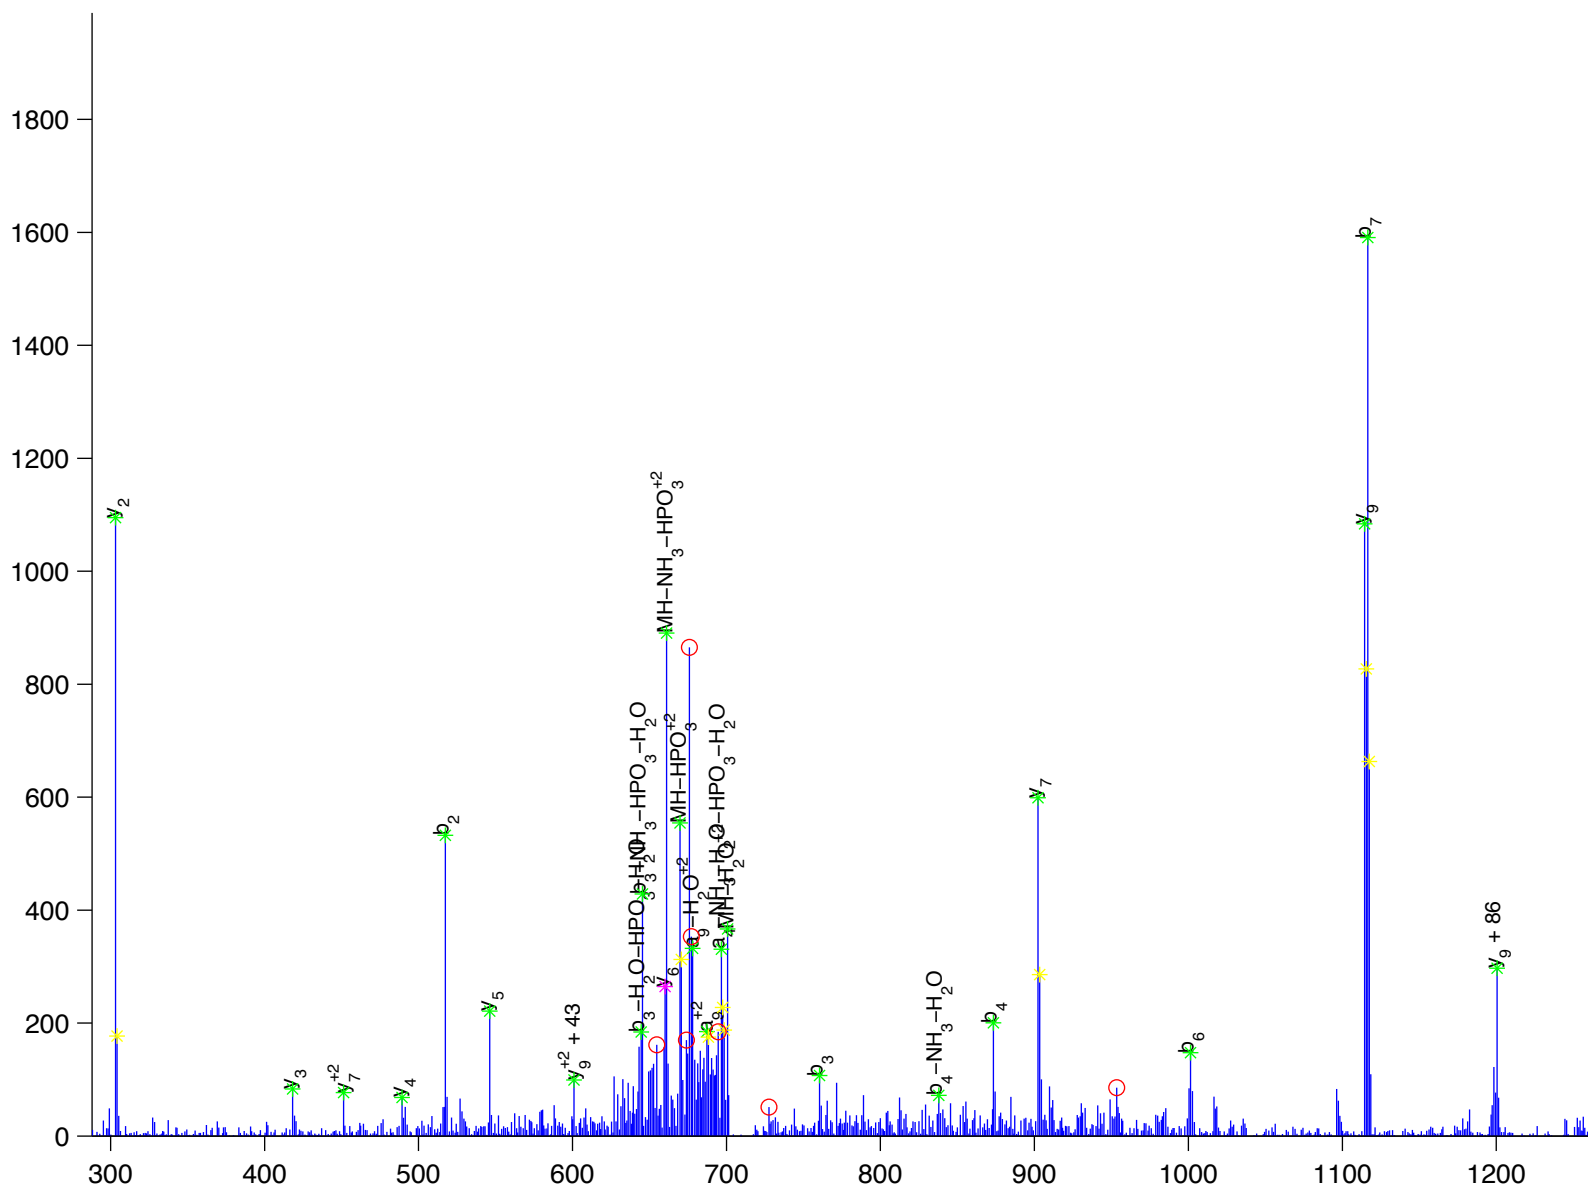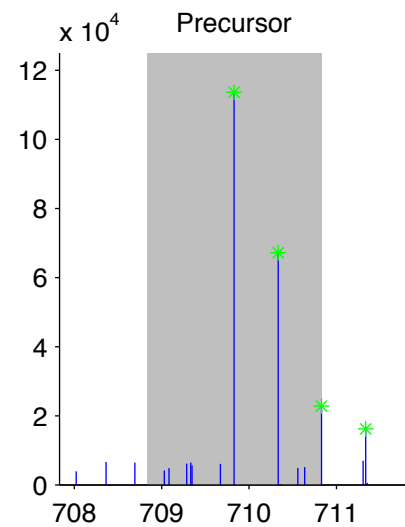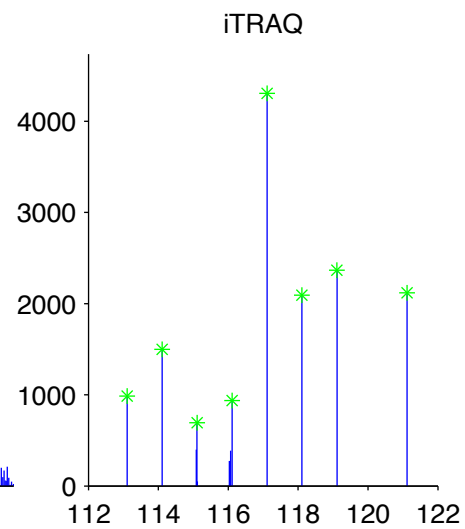

V [ y ] F [ Q ] S [ P ] P [ G ] A [ A ] G [ E ] G [ P ] G [ G ] A [ D ] D [ E ] G [ P ] V [ R ] R

protein phosphatase 1 regulatory subunit 14B [Homo sapiens]

Charge State: +3

Scan Number: 6053

File Name: HJ050711\_GBMxeno\_bio1\_E\_HANNAH.raw

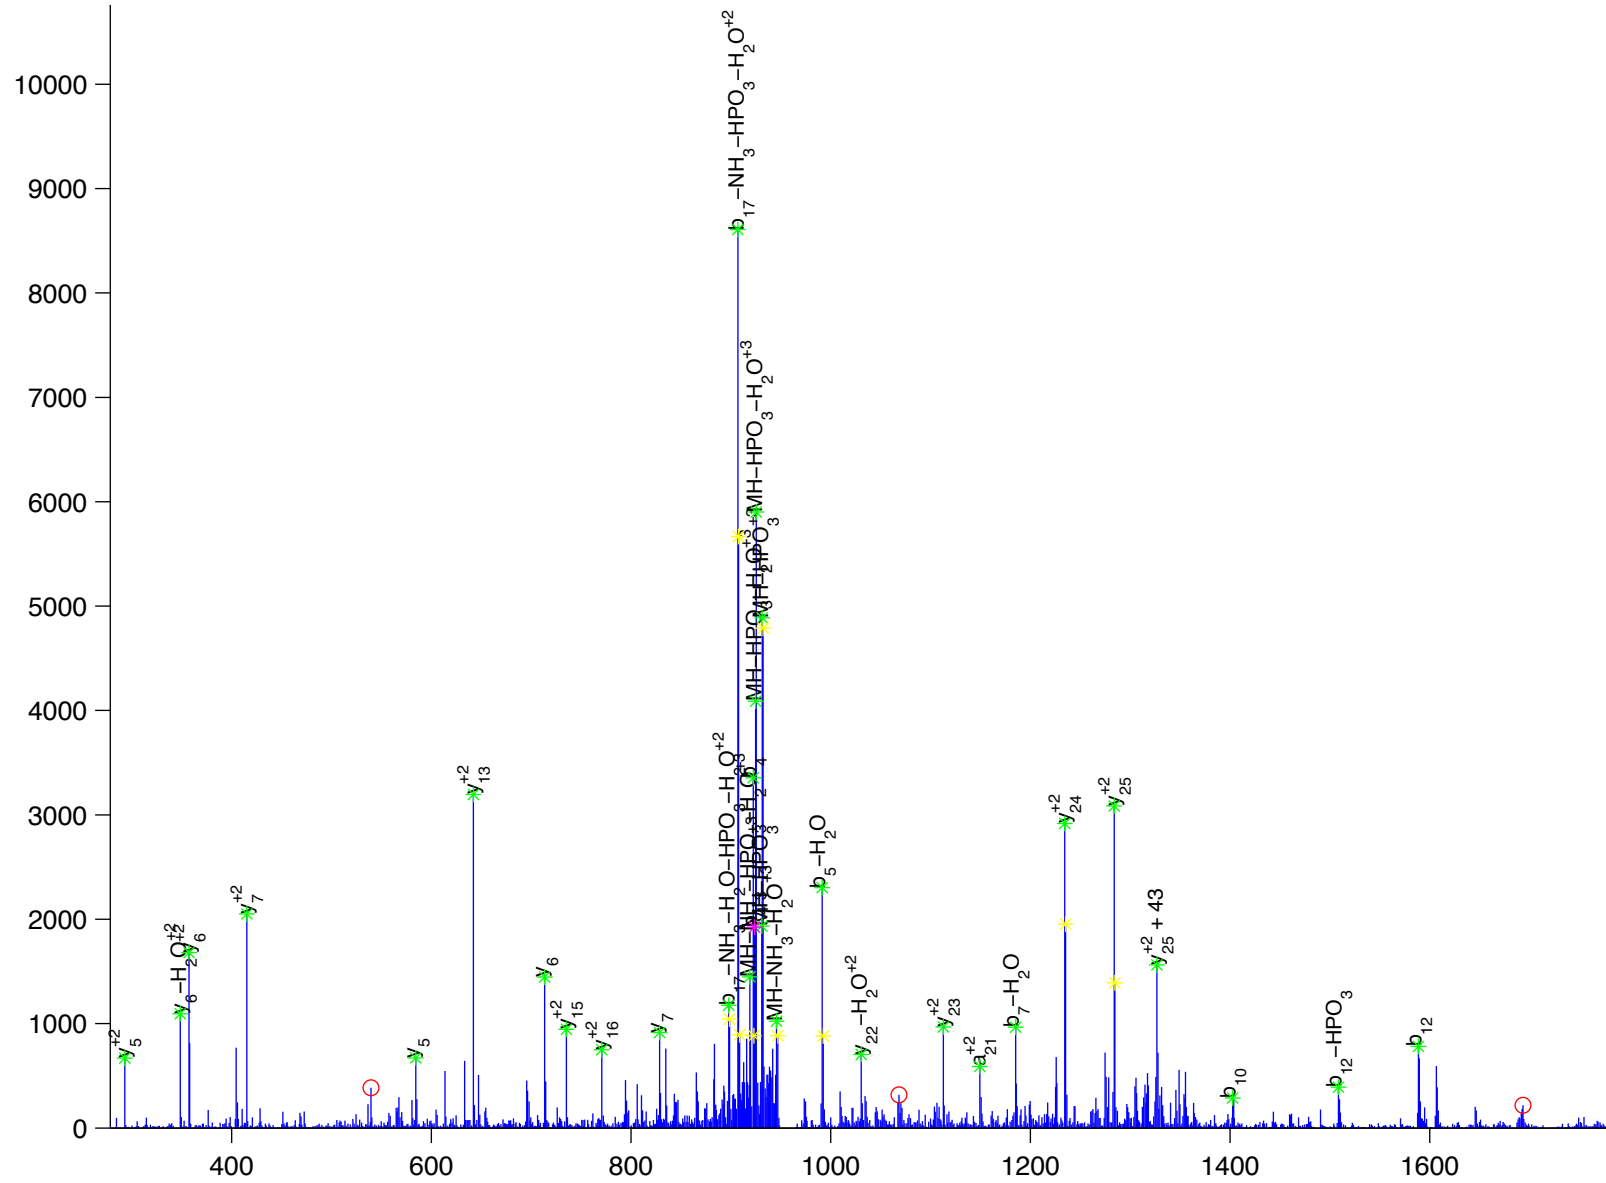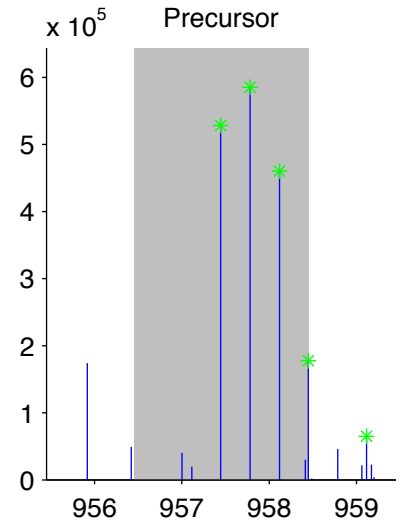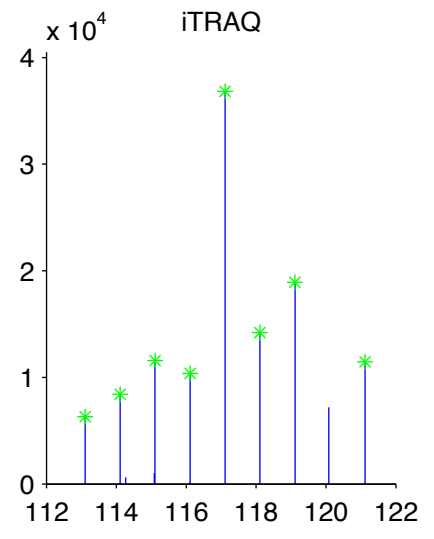

V [ y ] [ E ] [ N ] [ V ] [ G ] [ L ] [ M ] [ Q ] [ Q ] [ Q ] [ K ]

protein tyrosine phosphatase, non-receptor type 11 [Homo sapiens]

Charge State: +3

Scan Number: 6366

File Name: HJ050711\_GBMxeno\_bio1\_E\_HANNAH.raw

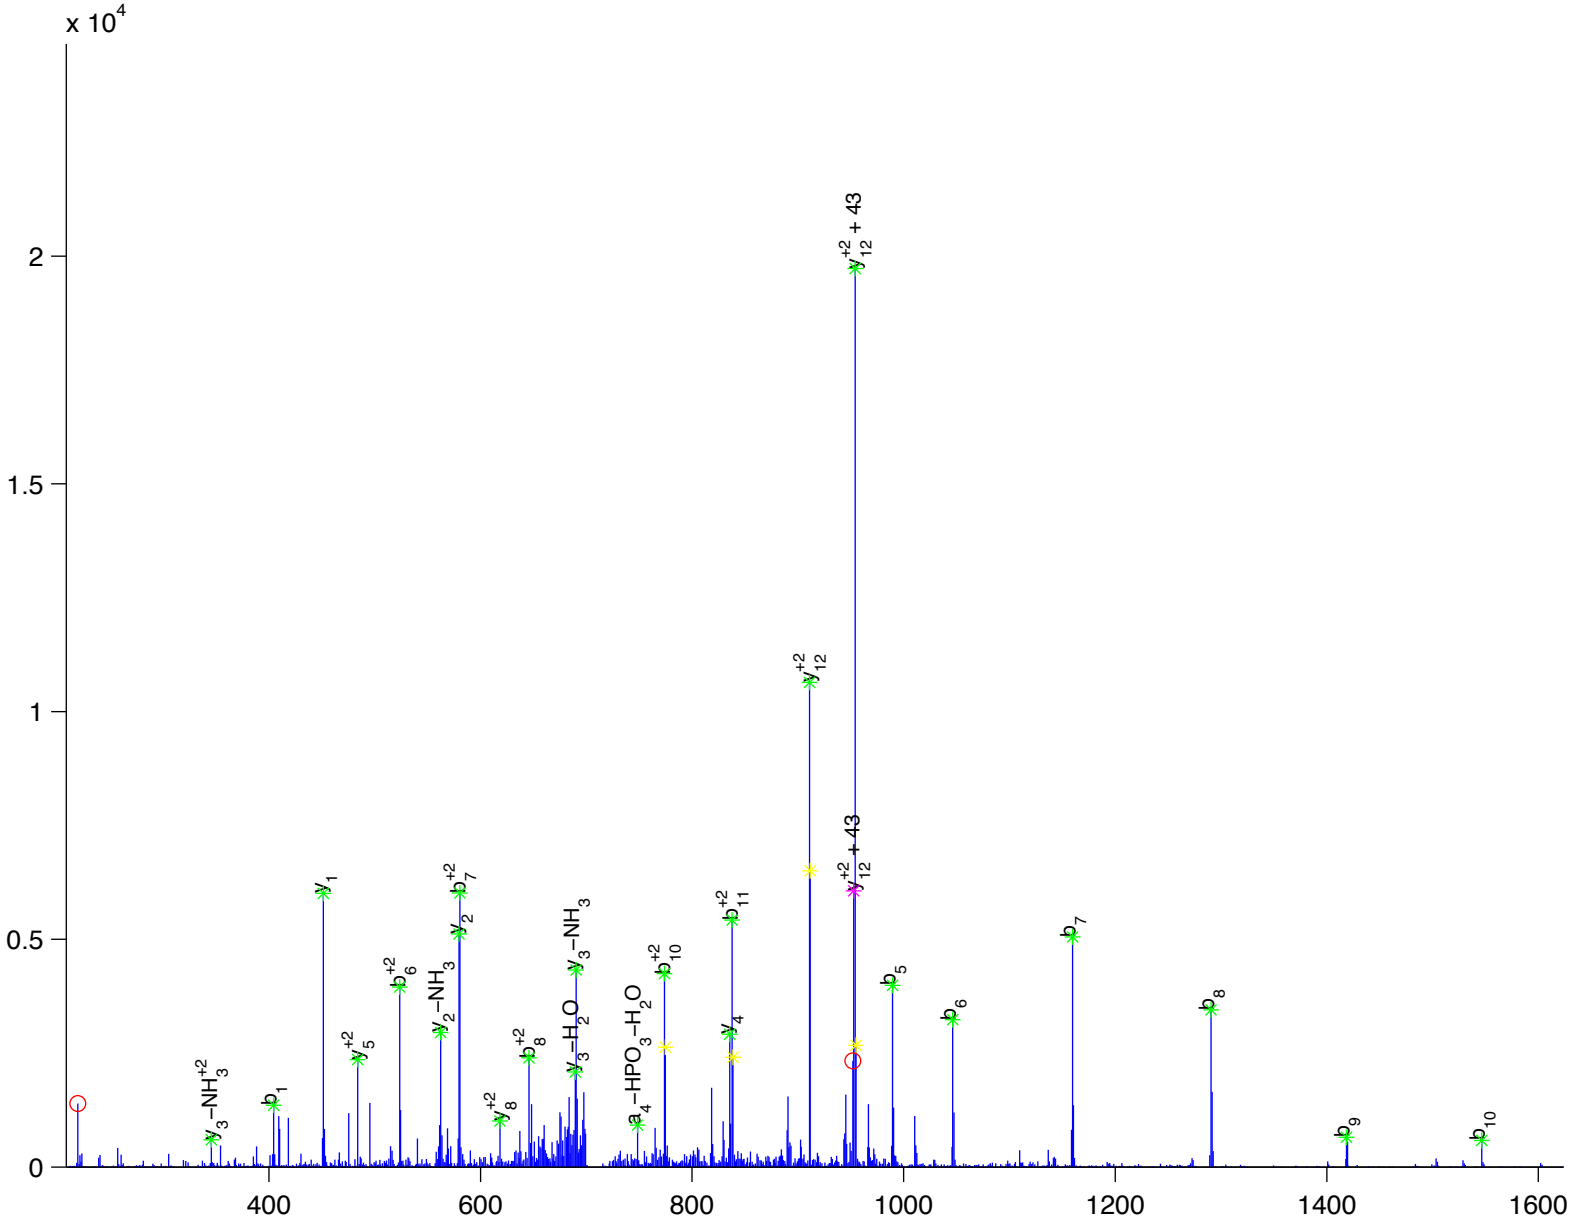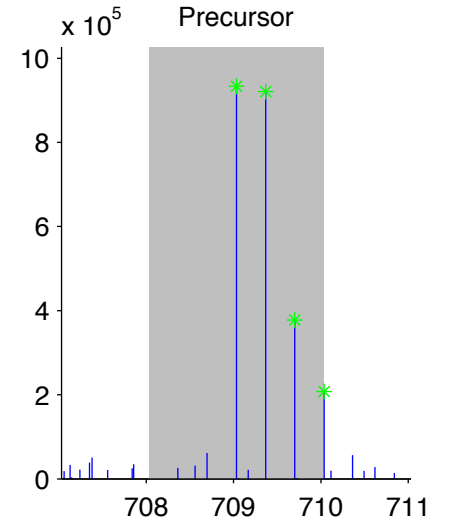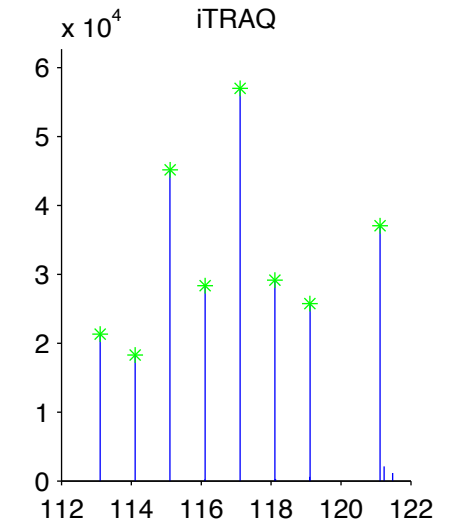

I [ Q ] N [ T ] G [ D ] y [ Y ] D [ L ] Y [ G ] G [ E ] K

protein tyrosine phosphatase, non-receptor type 11 [Homo sapiens]

Charge State: +2

Scan Number: 6853

File Name: HJ050711\_GBMxeno\_bio1\_E\_HANNAH.raw

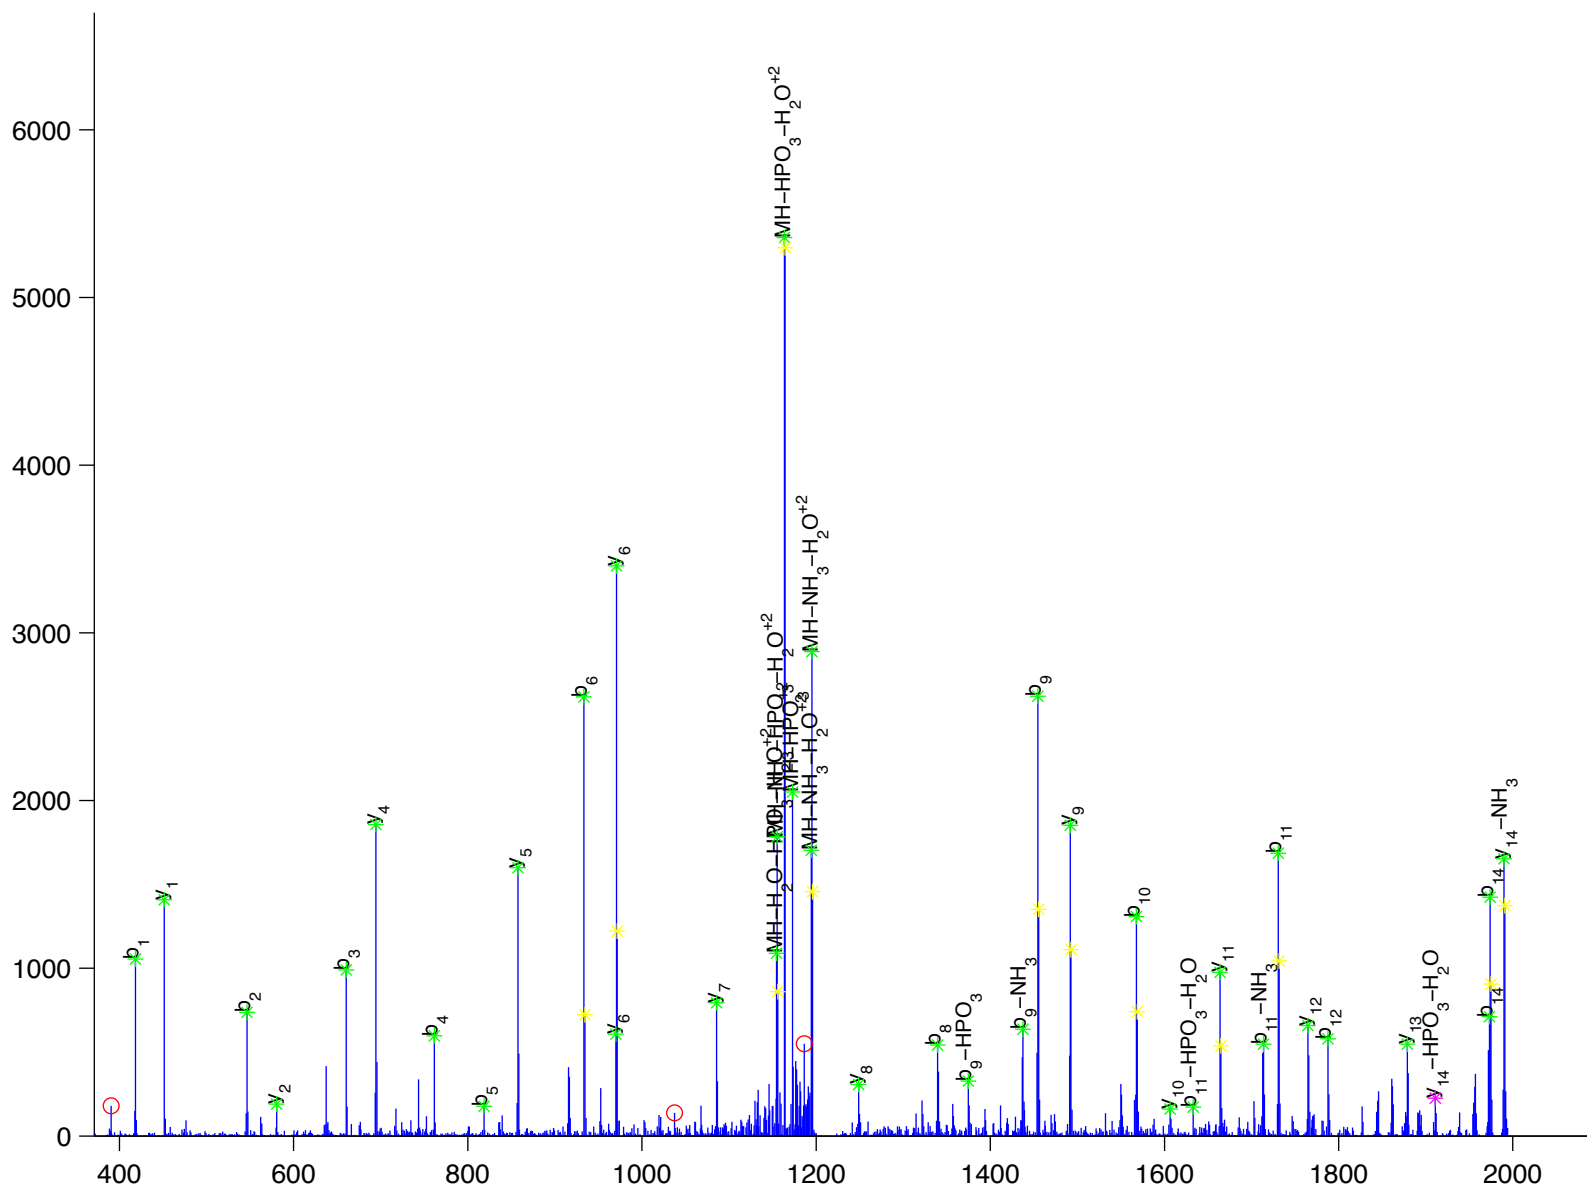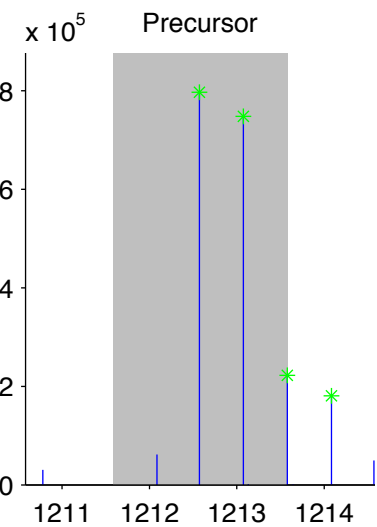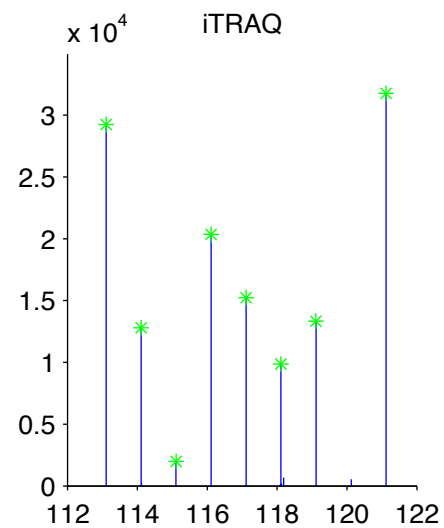

I [ Q ] N [ T ] G [ D ] y [ Y ] D [ L ] Y [ G ] G [ E ] K

protein tyrosine phosphatase, non-receptor type 11 [Homo sapiens]

Charge State: +3

Scan Number: 6891

File Name: HJ050711\_GBMxeno\_bio1\_E\_HANNAH.raw

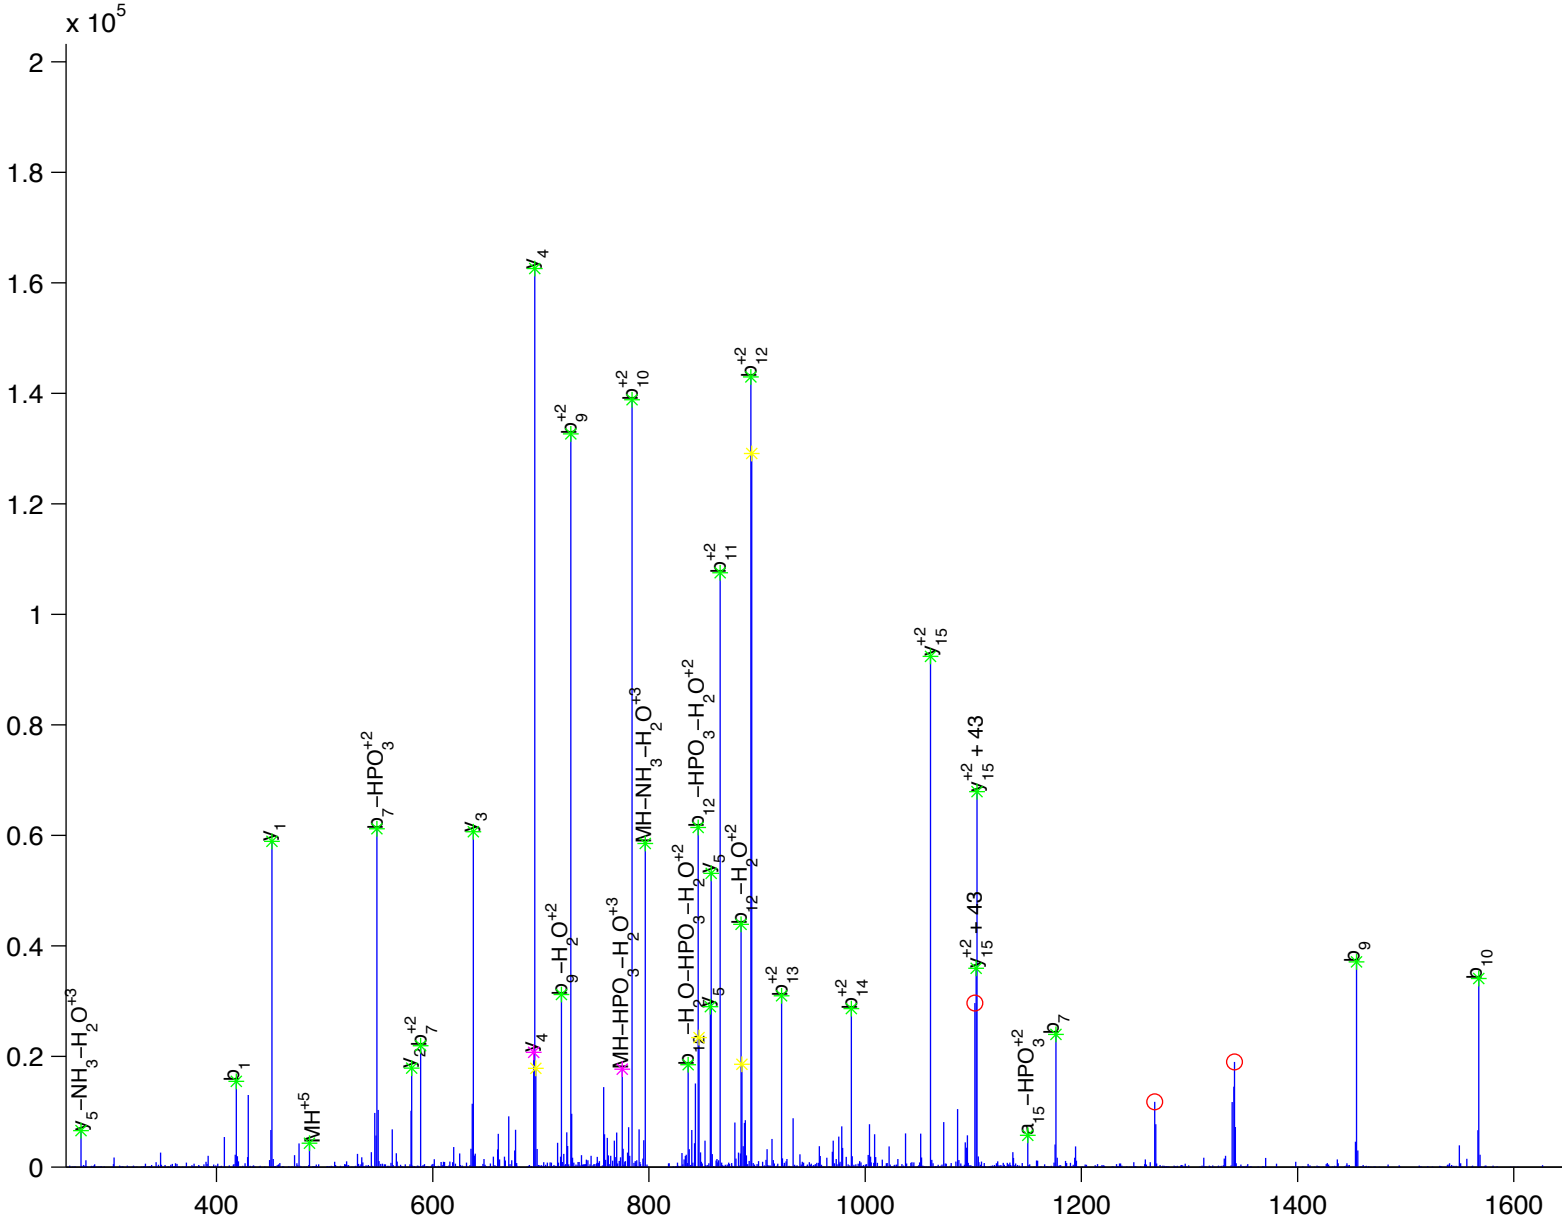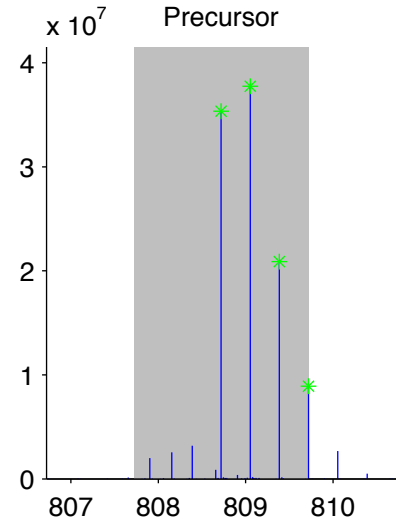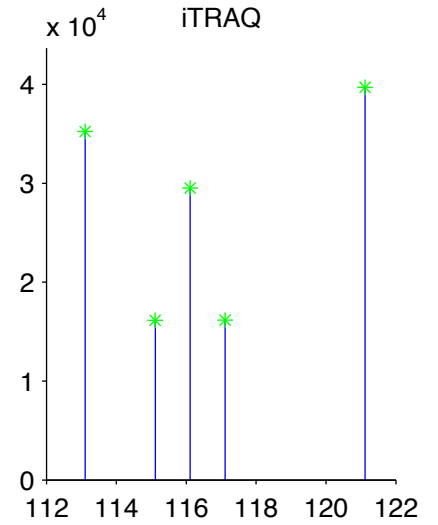

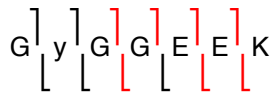

protein tyrosine phosphatase, non-receptor type 5 (striatum-enriched) isoform a [Homo sapiens]

Charge State: +3

Scan Number: 5053

File Name: HJ050711\_GBMxeno\_bio1\_E\_HANNAH.raw

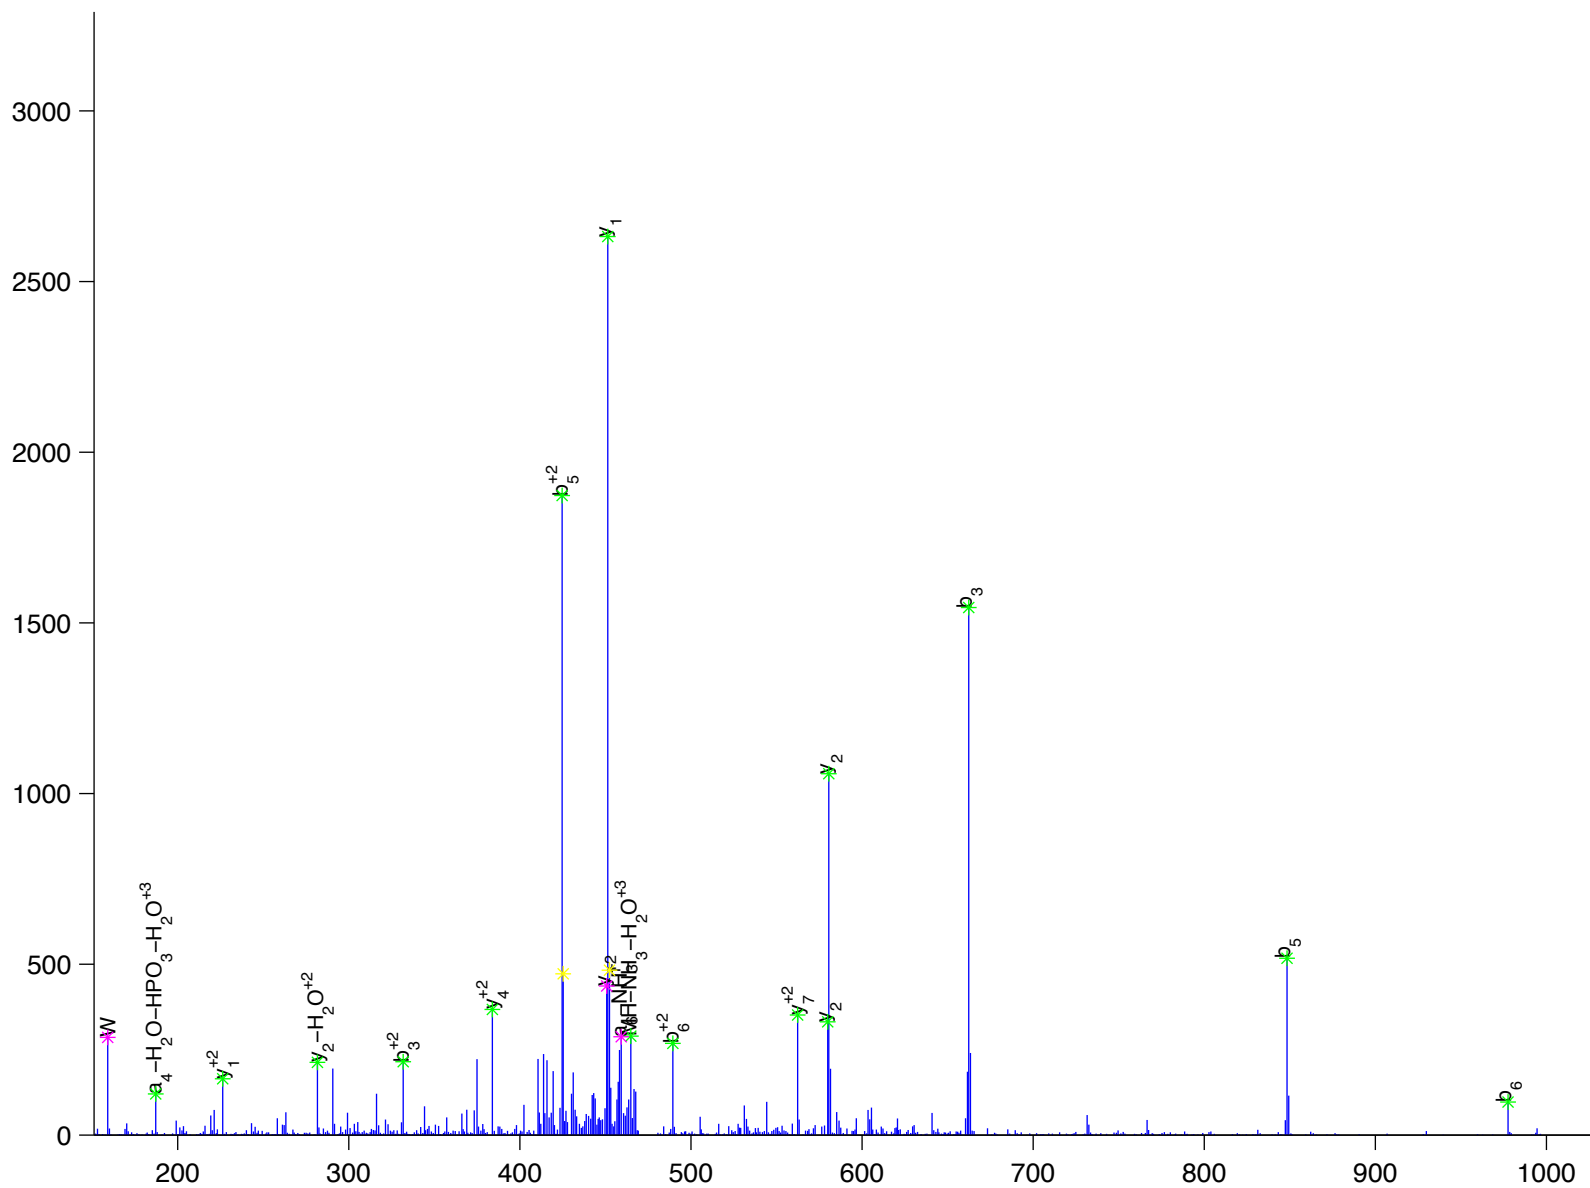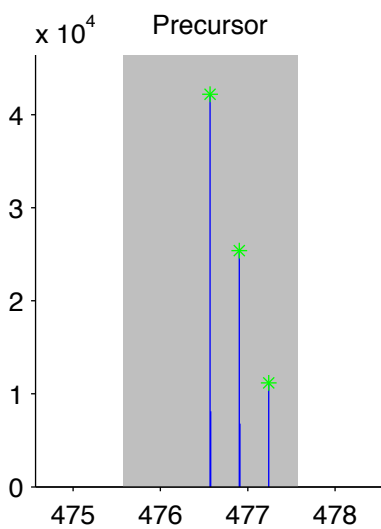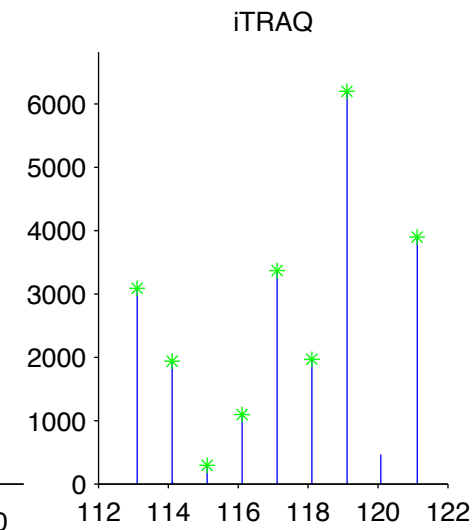

V[V]Q[E]Y[I]D[A]F[S]D[y]A[N]F]K

protein tyrosine phosphatase, receptor type, A isoform 1 precursor [Homo sapiens]

Charge State: +3

Scan Number: 10114

File Name: HJ050711\_GBMxeno\_bio1\_E\_HANNAH.raw

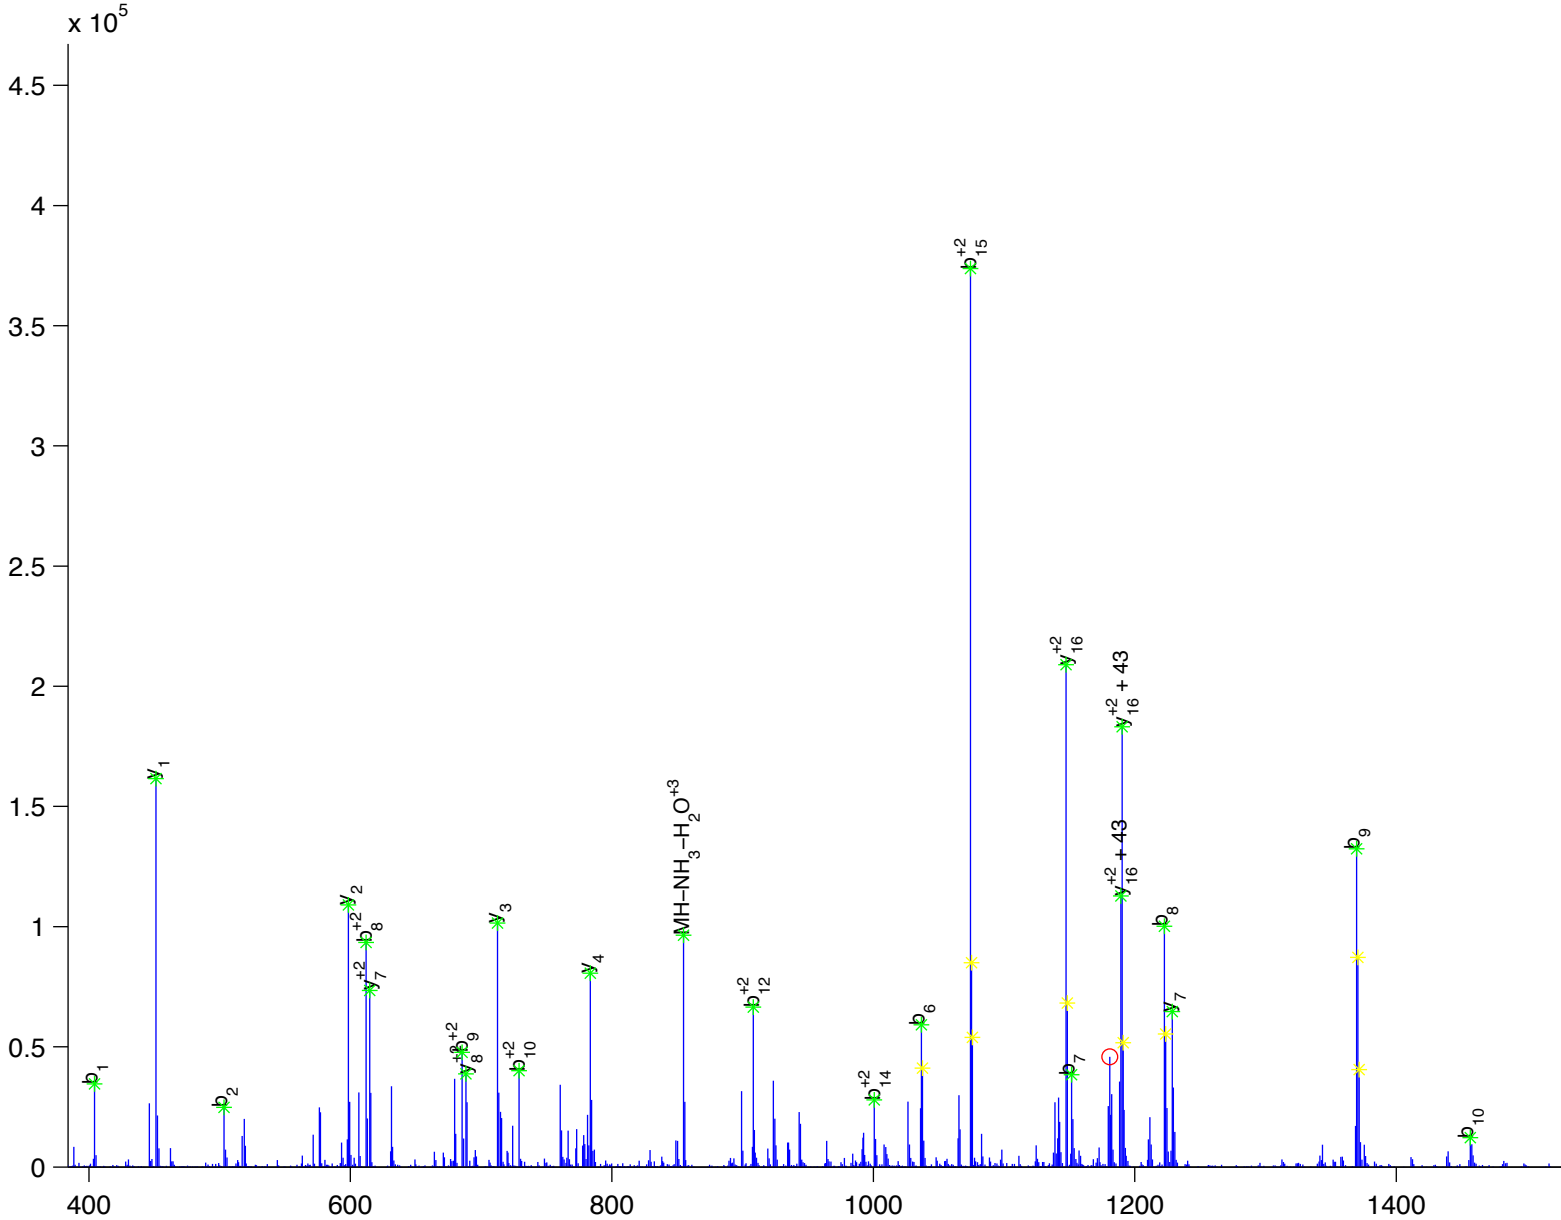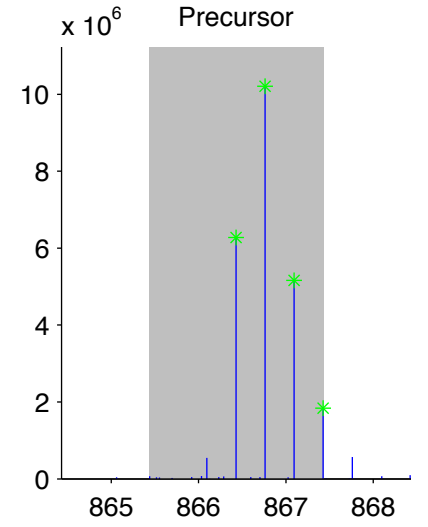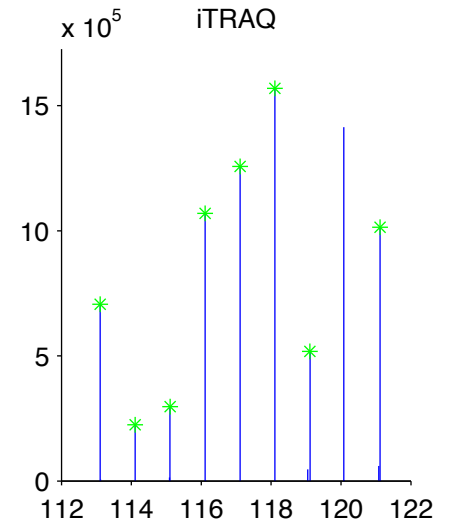



V V Q E Y I D A F S D y A N F K

protein tyrosine phosphatase, receptor type, A isoform 1 precursor [Homo sapiens]

Charge State: +2

Scan Number: 10127

File Name: HJ050711\_GBMxeno\_bio1\_E\_HANNAH.raw

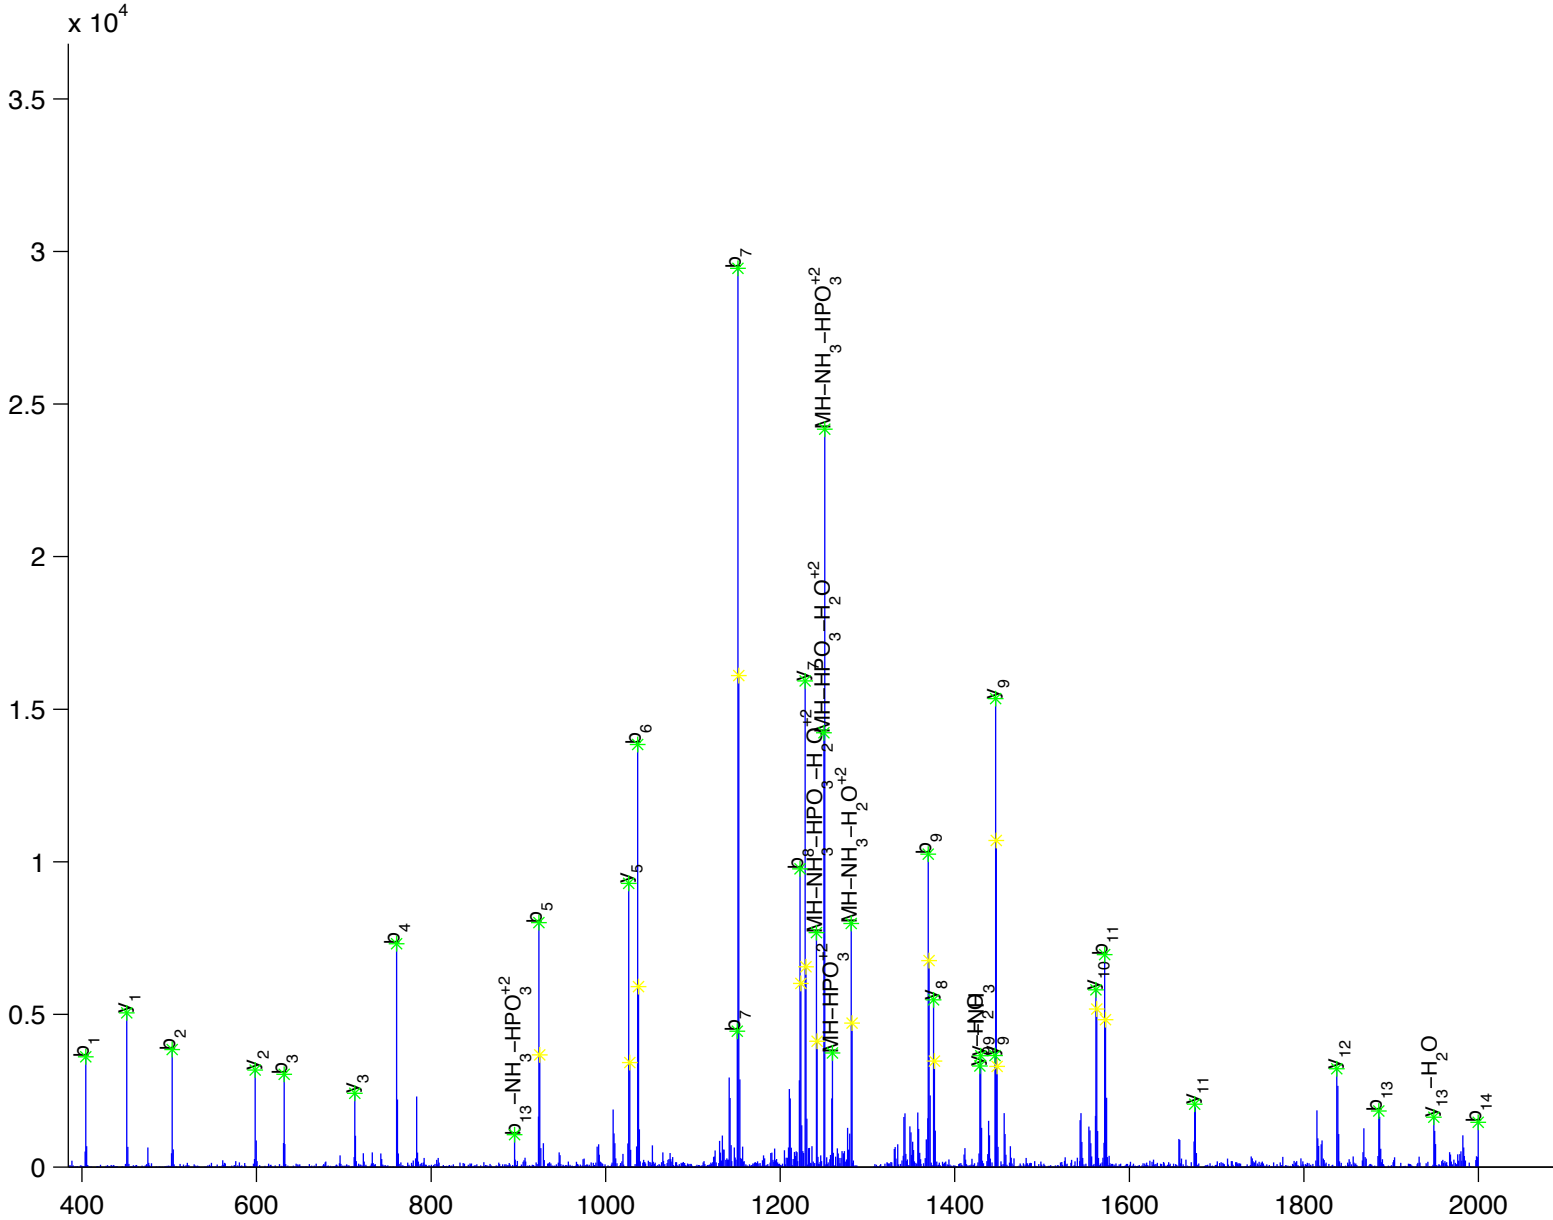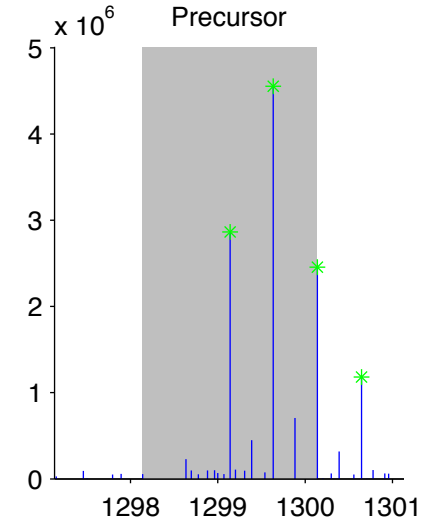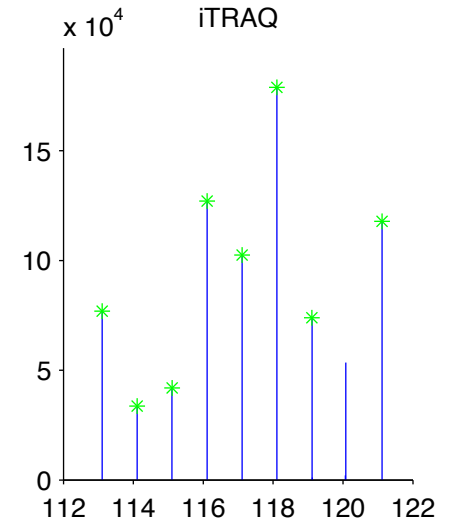

V V Q E Y I D A F S D y A N F K

protein tyrosine phosphatase, receptor type, A isoform 1 precursor [Homo sapiens]

Charge State: +4

Scan Number: 10133

File Name: HJ050711\_GBMxeno\_bio1\_E\_HANNAH.raw

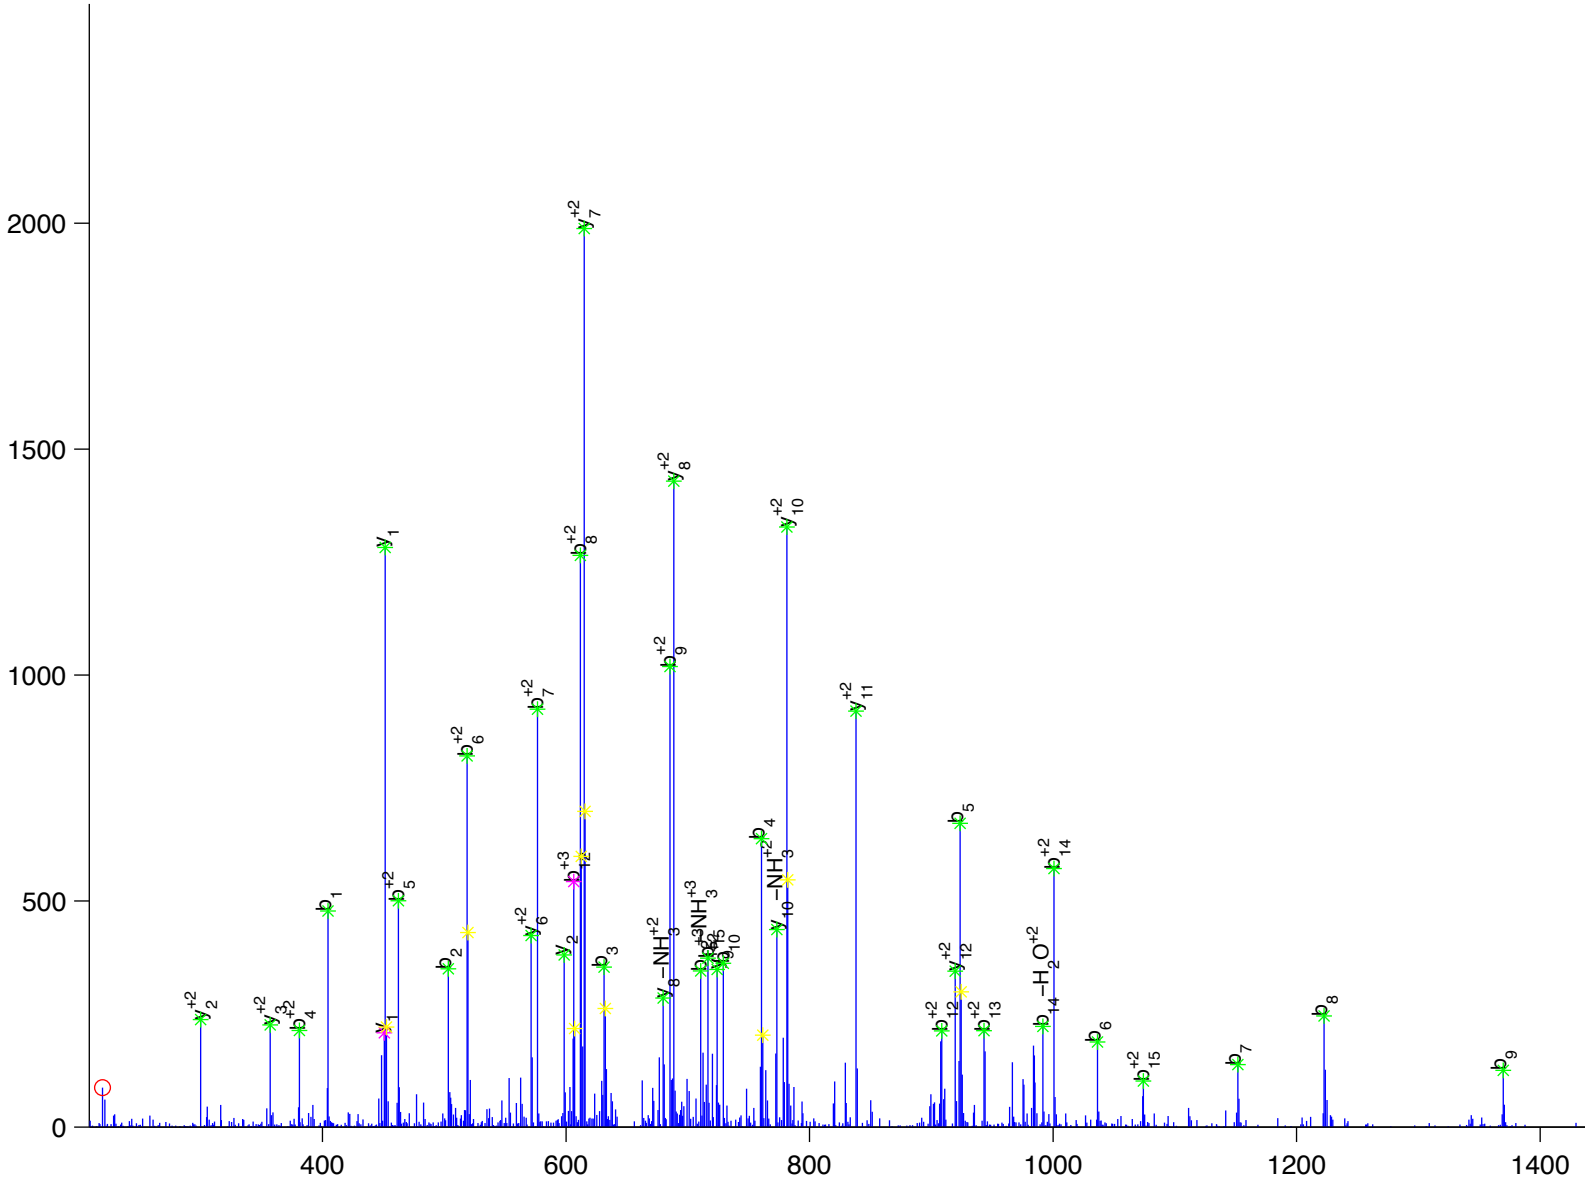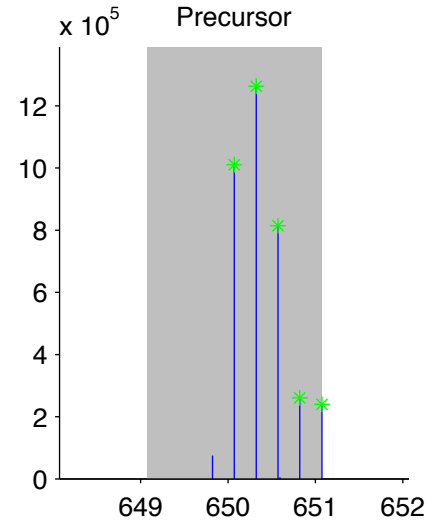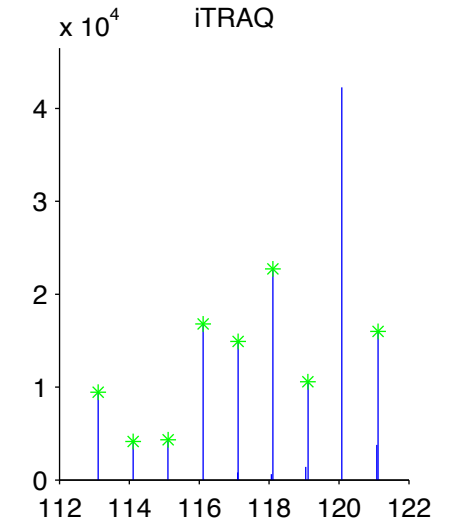

L I I Q D F I L E A T Q D D y V L E V R

protein tyrosine phosphatase, receptor-type, zeta1 precursor [Homo sapiens]

Charge State: +3

Scan Number: 10230

File Name: HJ050711\_GBMxeno\_bio1\_E\_HANNAH.raw

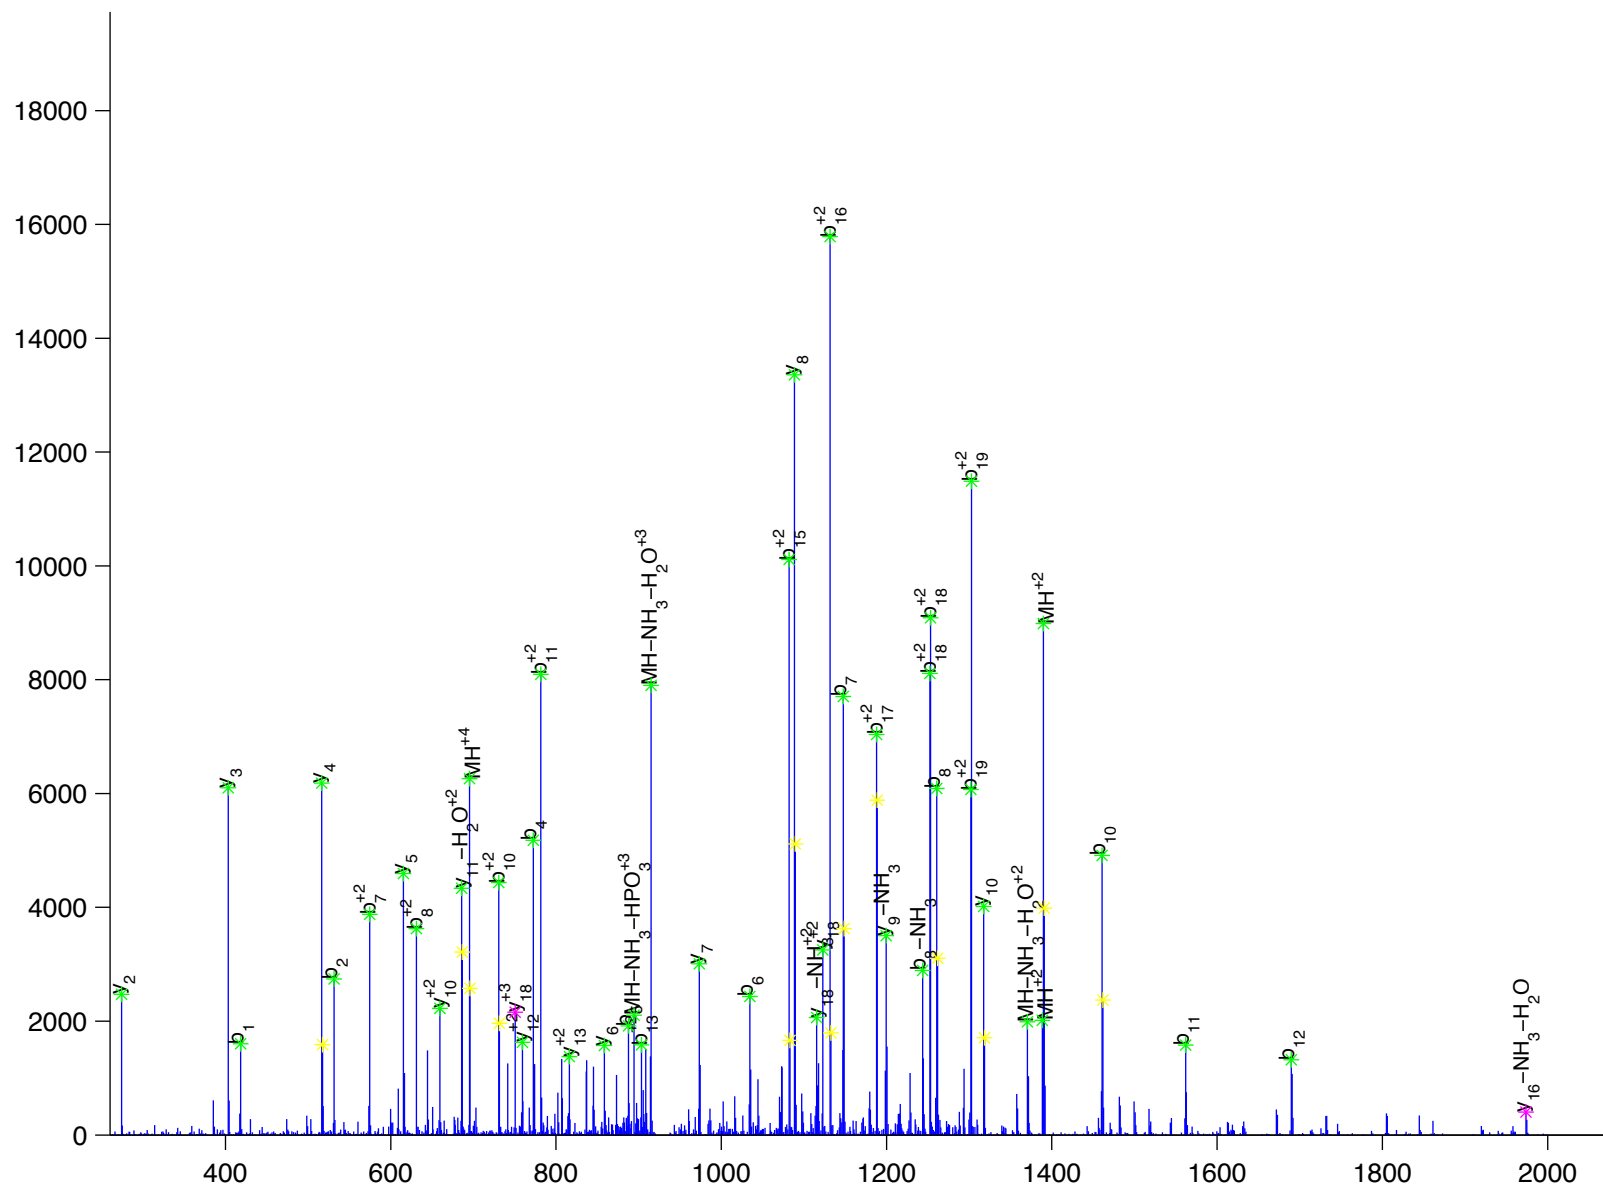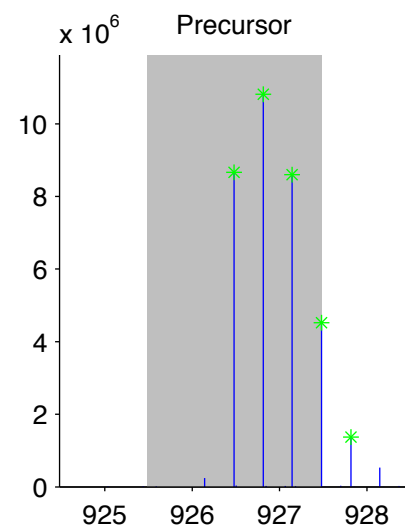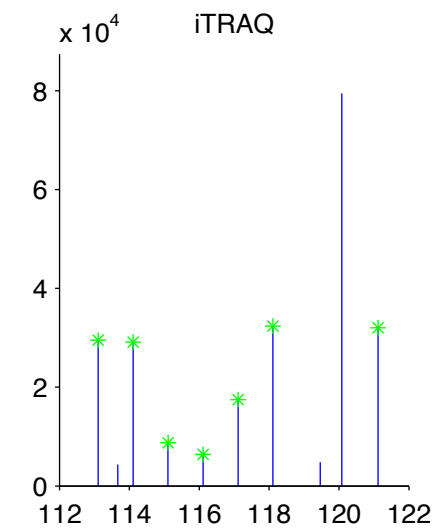

L I I Q D F I L E A T Q D D y V L E V R

protein tyrosine phosphatase, receptor-type, zeta1 precursor [Homo sapiens]

Charge State: +3

Scan Number: 10610

File Name: HJ050711\_GBMxeno\_bio1\_E\_HANNAH.raw

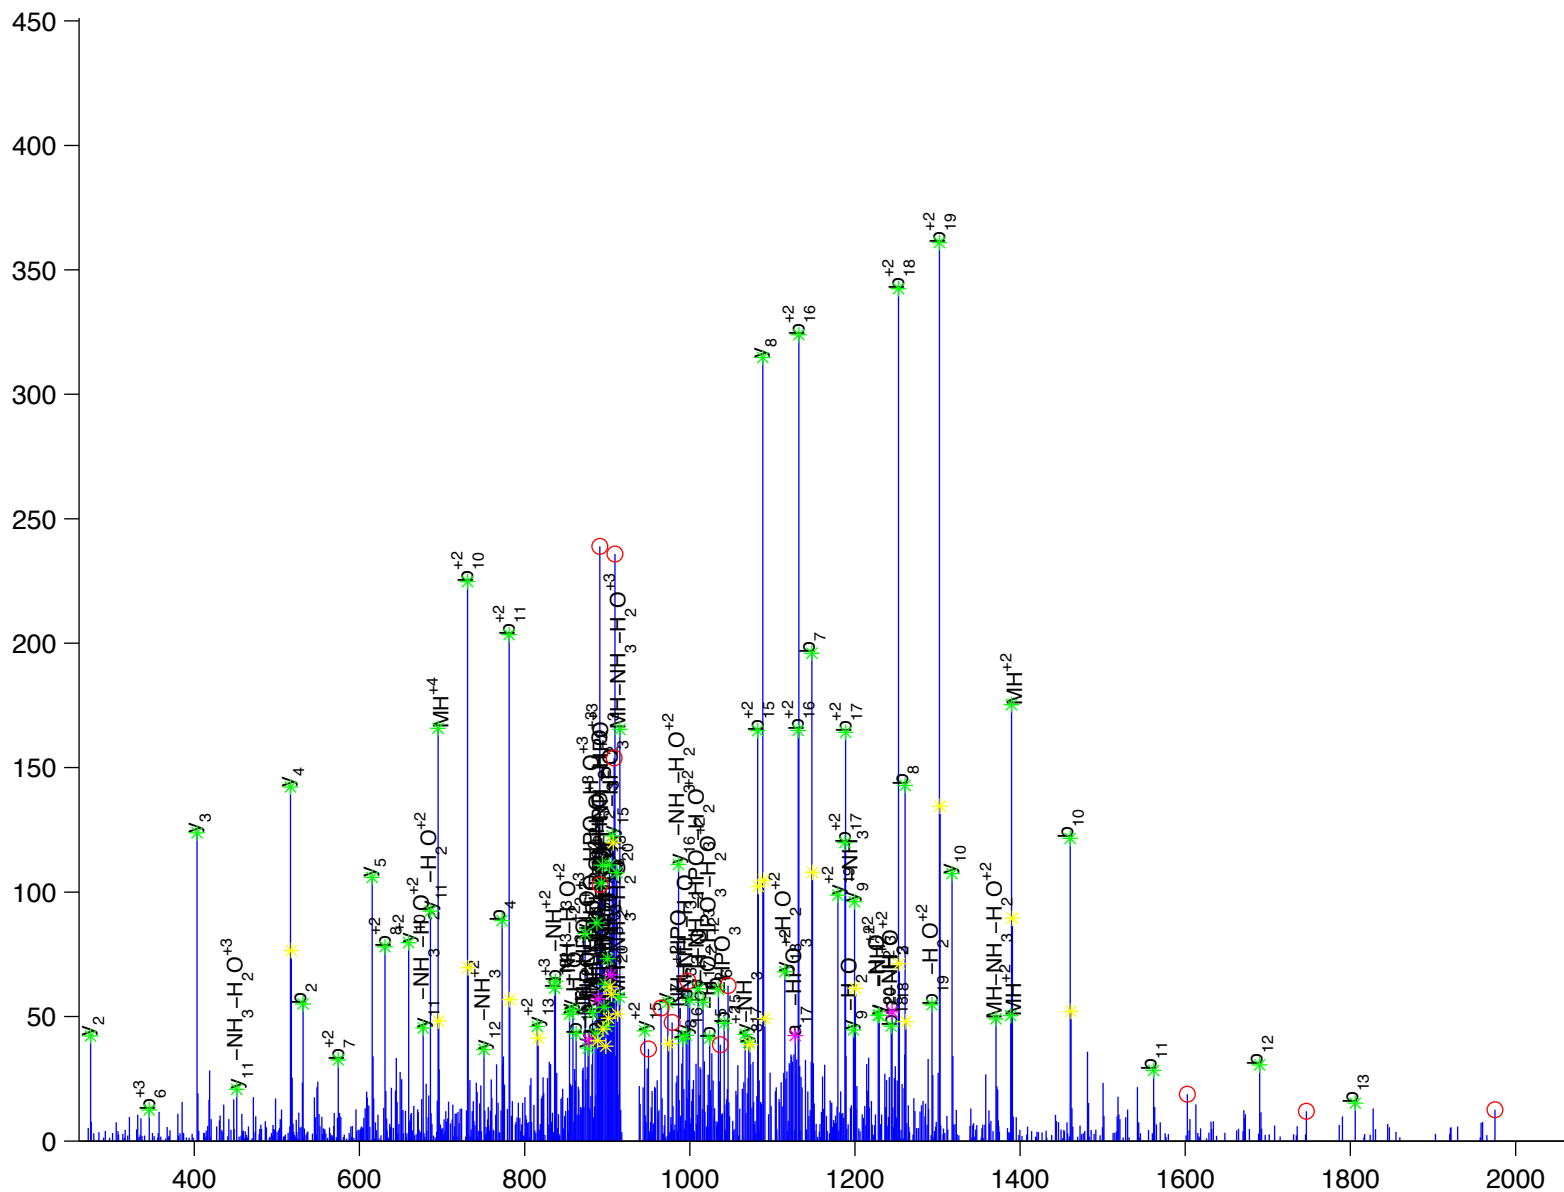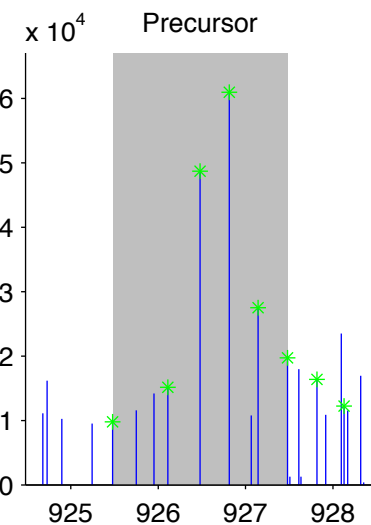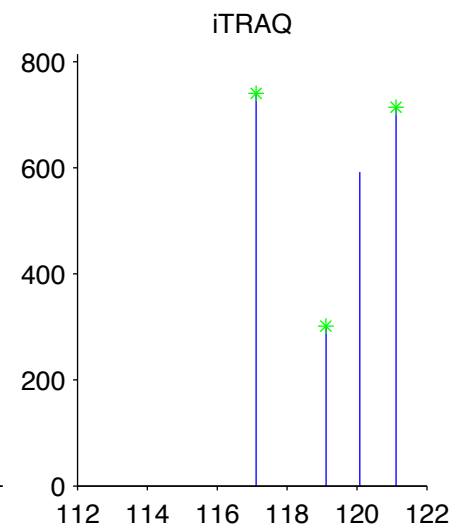

L I E D N E y T A R

protein-tyrosine kinase fyn isoform a [Homo sapiens]

Charge State: +3

Scan Number: 5744

File Name: HJ050711\_GBMxeno\_bio1\_E\_HANNAH.raw

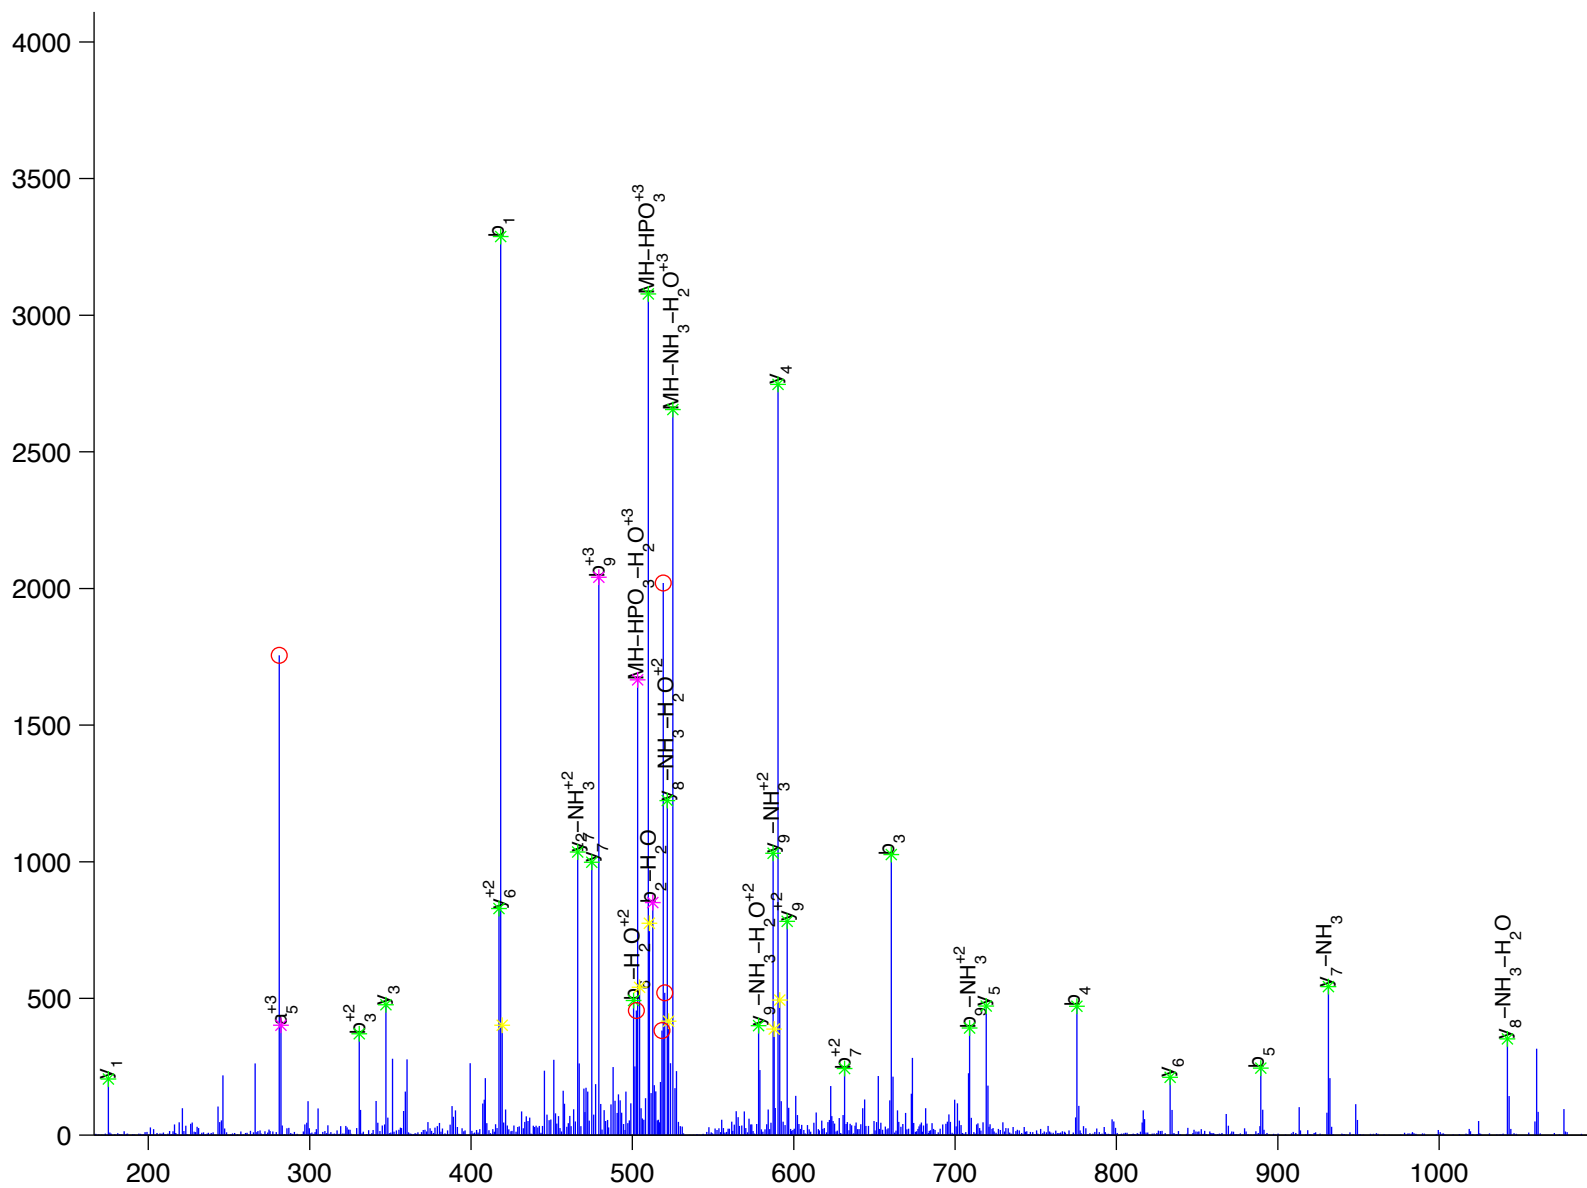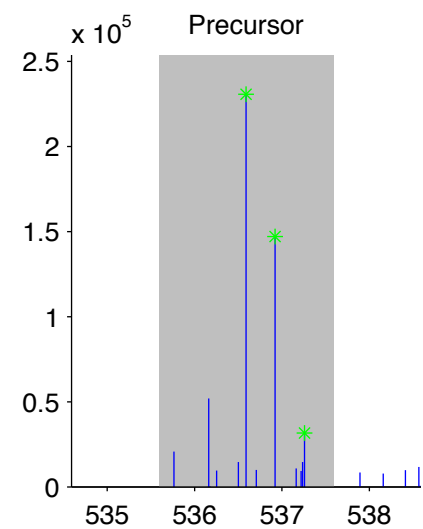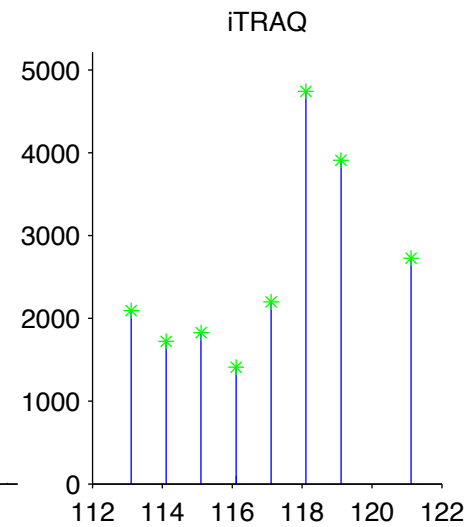

L I E D N E y T A R

protein-tyrosine kinase fyn isoform a [Homo sapiens]

Charge State: +2

Scan Number: 5767

File Name: HJ050711\_GBMxeno\_bio1\_E\_HANNAH.raw

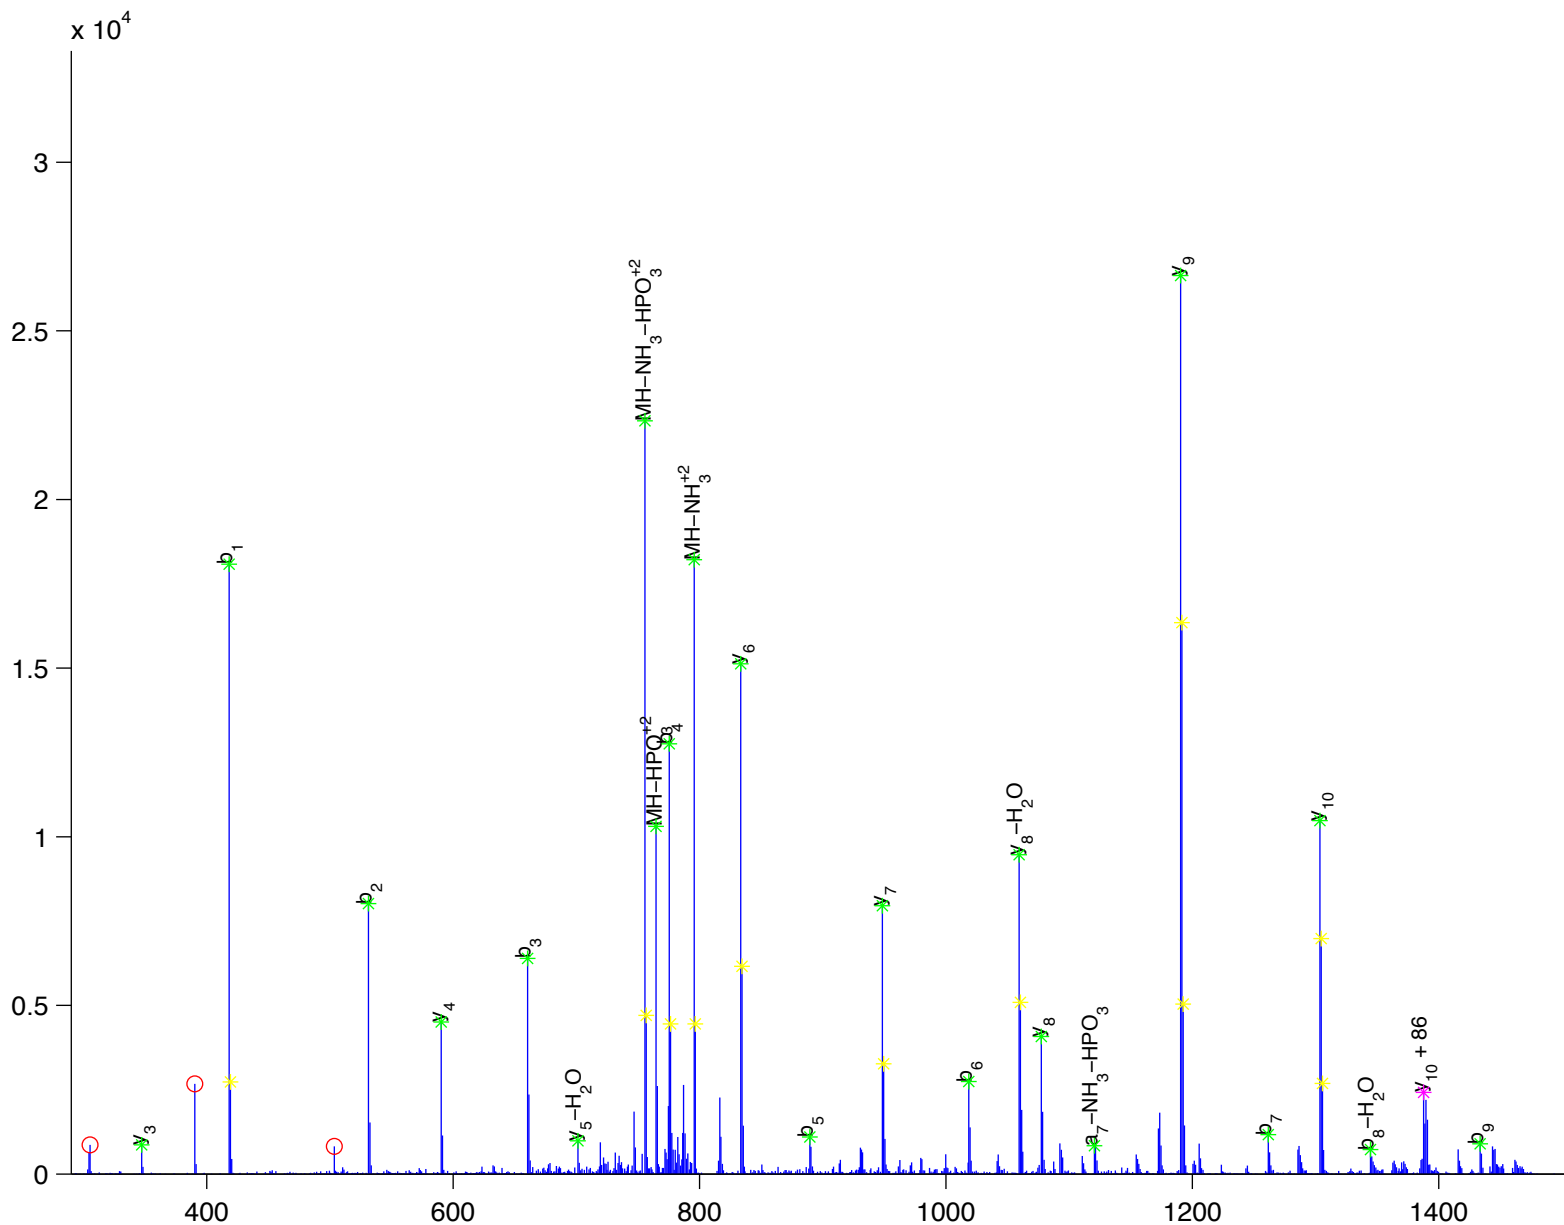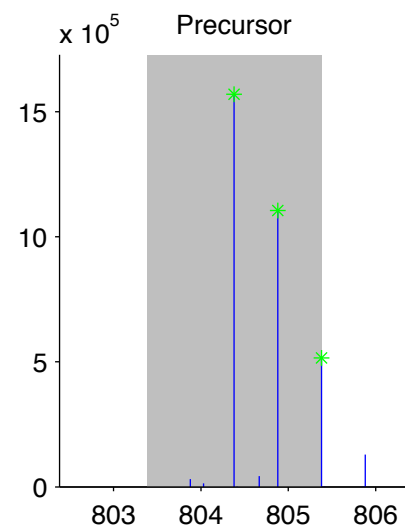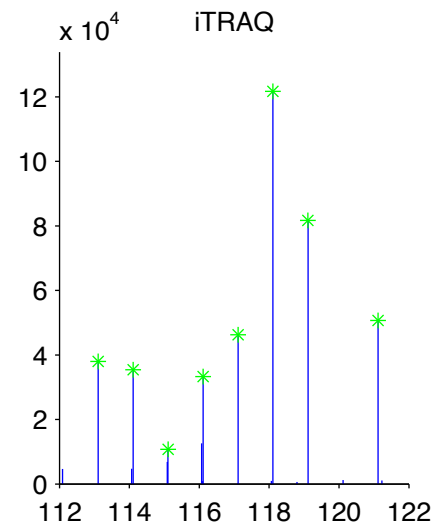

L I E D N E y T A R

protein-tyrosine kinase fyn isoform a [Homo sapiens]

Charge State: +2

Scan Number: 5883

File Name: HJ050711\_GBMxeno\_bio1\_E\_HANNAH.raw

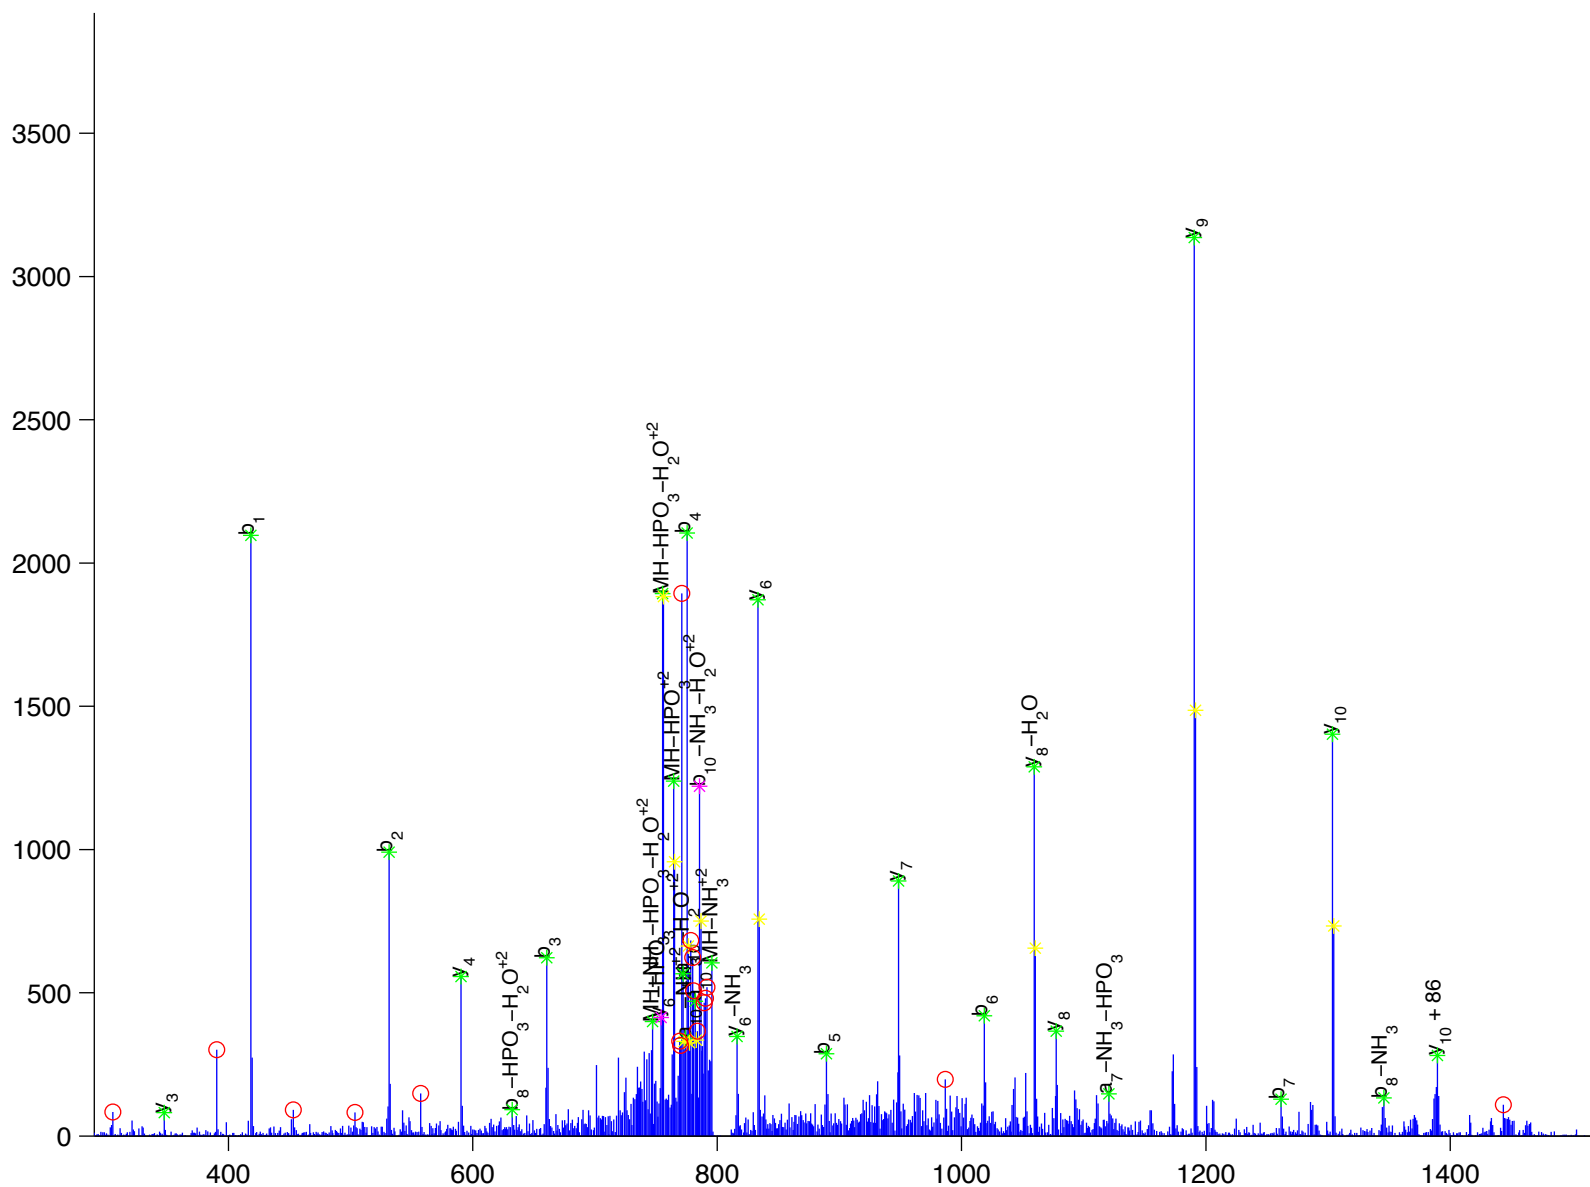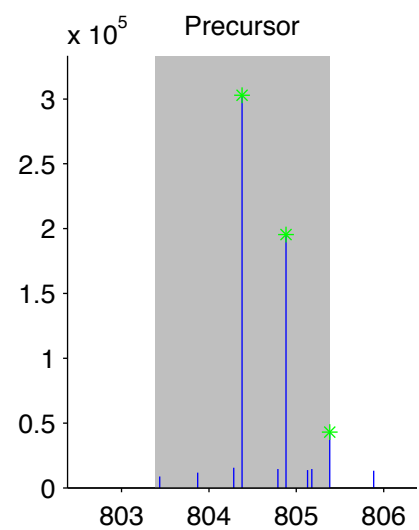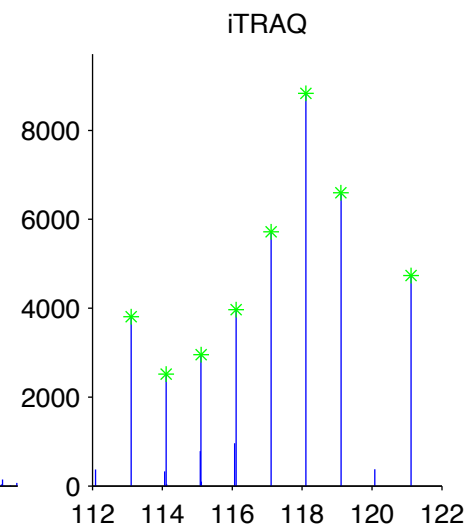

L I E D N E y T A R

protein-tyrosine kinase fyn isoform a [Homo sapiens]

Charge State: +3

Scan Number: 5925

File Name: HJ050711\_GBMxeno\_bio1\_E\_HANNAH.raw

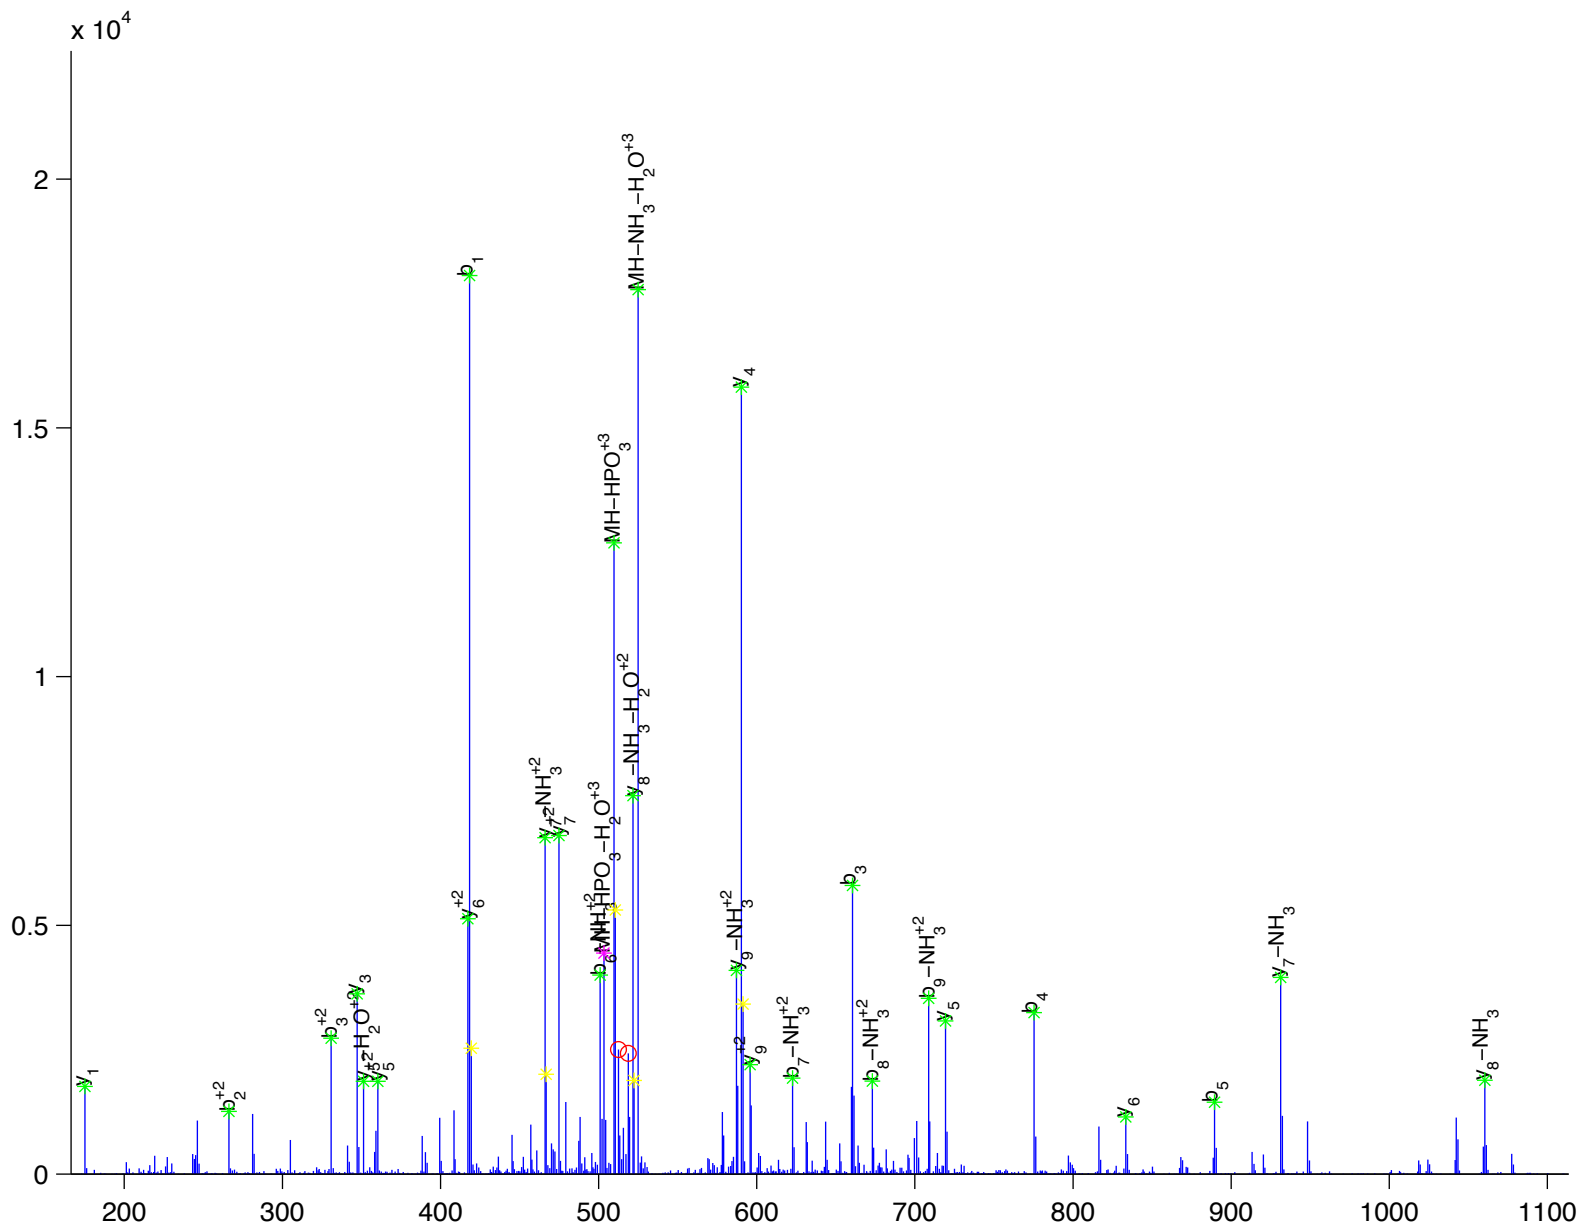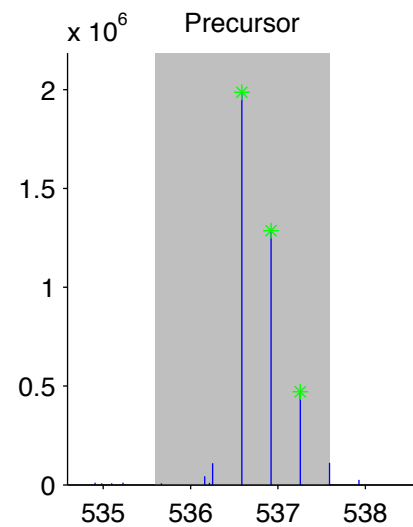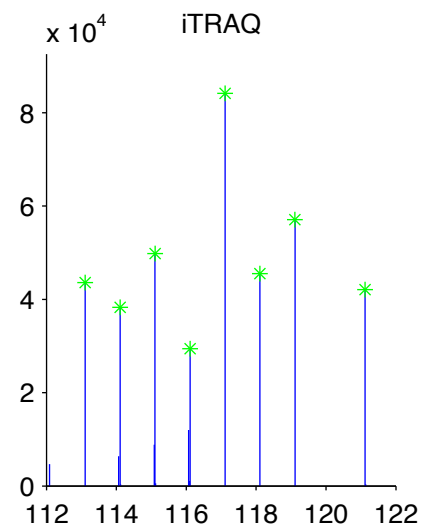



L I E D N E y T A R

protein-tyrosine kinase fyn isoform a [Homo sapiens]

Charge State: +2

Scan Number: 5948

File Name: HJ050711\_GBMxeno\_bio1\_E\_HANNAH.raw

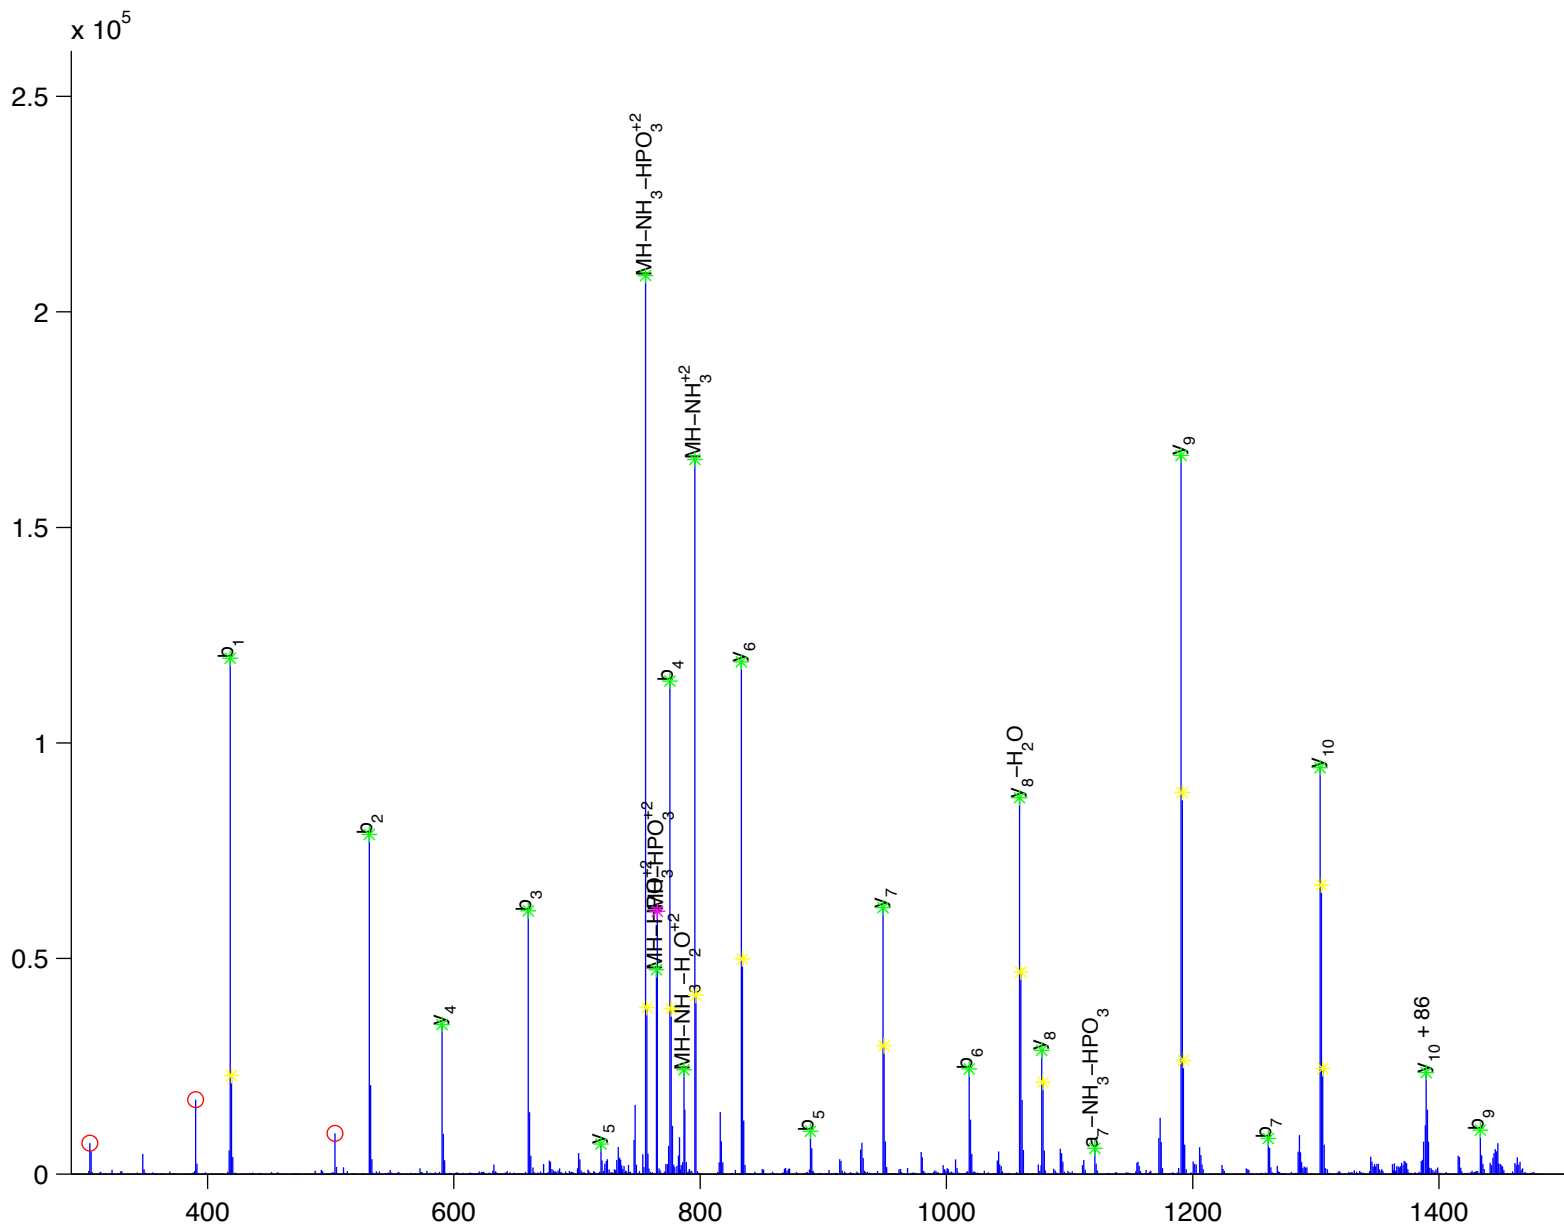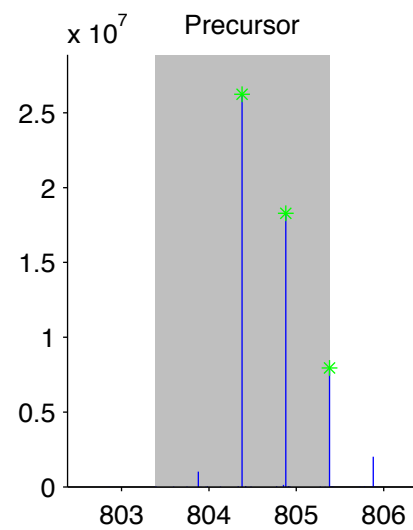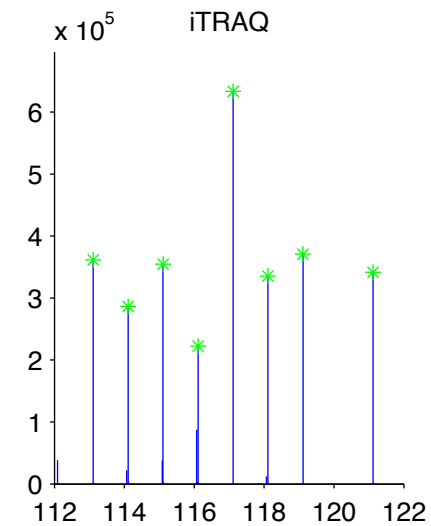

L I E D N E y T A R

protein-tyrosine kinase fyn isoform a [Homo sapiens]

Charge State: +2

Scan Number: 6072

File Name: HJ050711\_GBMxeno\_bio1\_E\_HANNAH.raw

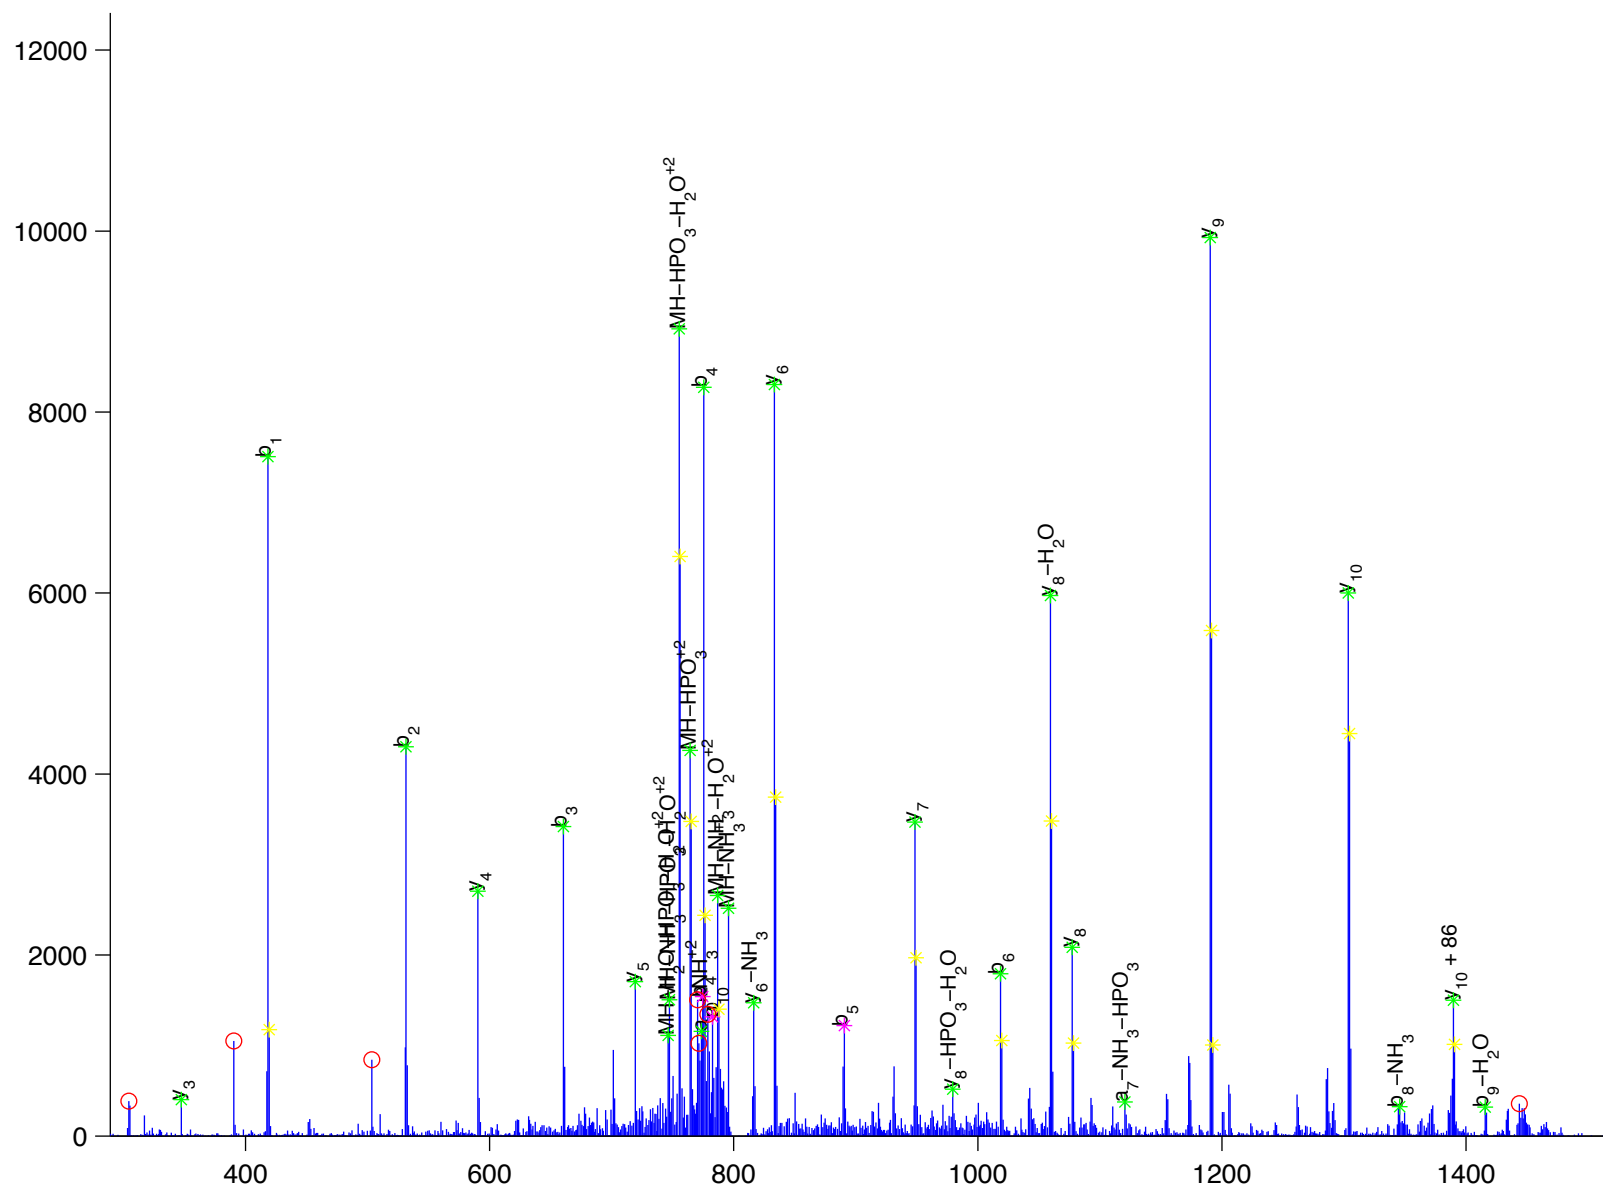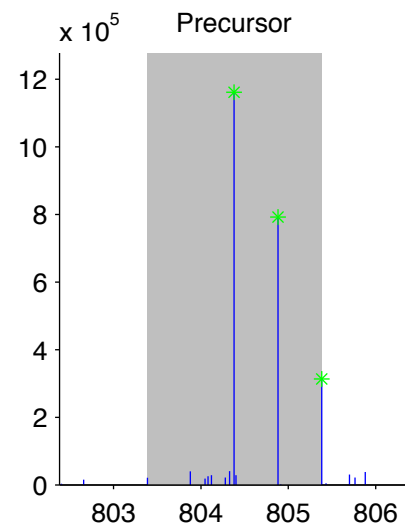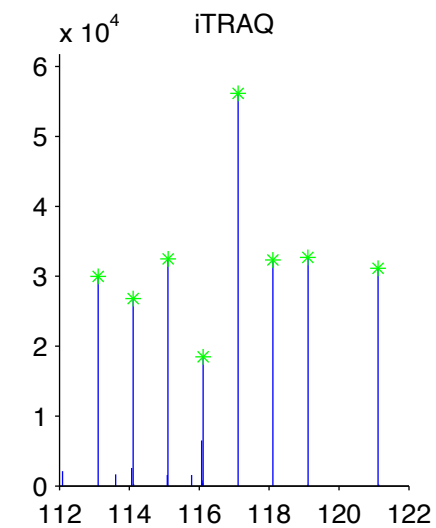

Y [ m ] E [ D ] S [ T ] y [ Y ] K

PTK2 protein tyrosine kinase 2 isoform a [Homo sapiens]

Charge State: +3

Scan Number: 4742

File Name: HJ050711\_GBMxeno\_bio1\_E\_HANNAH.raw

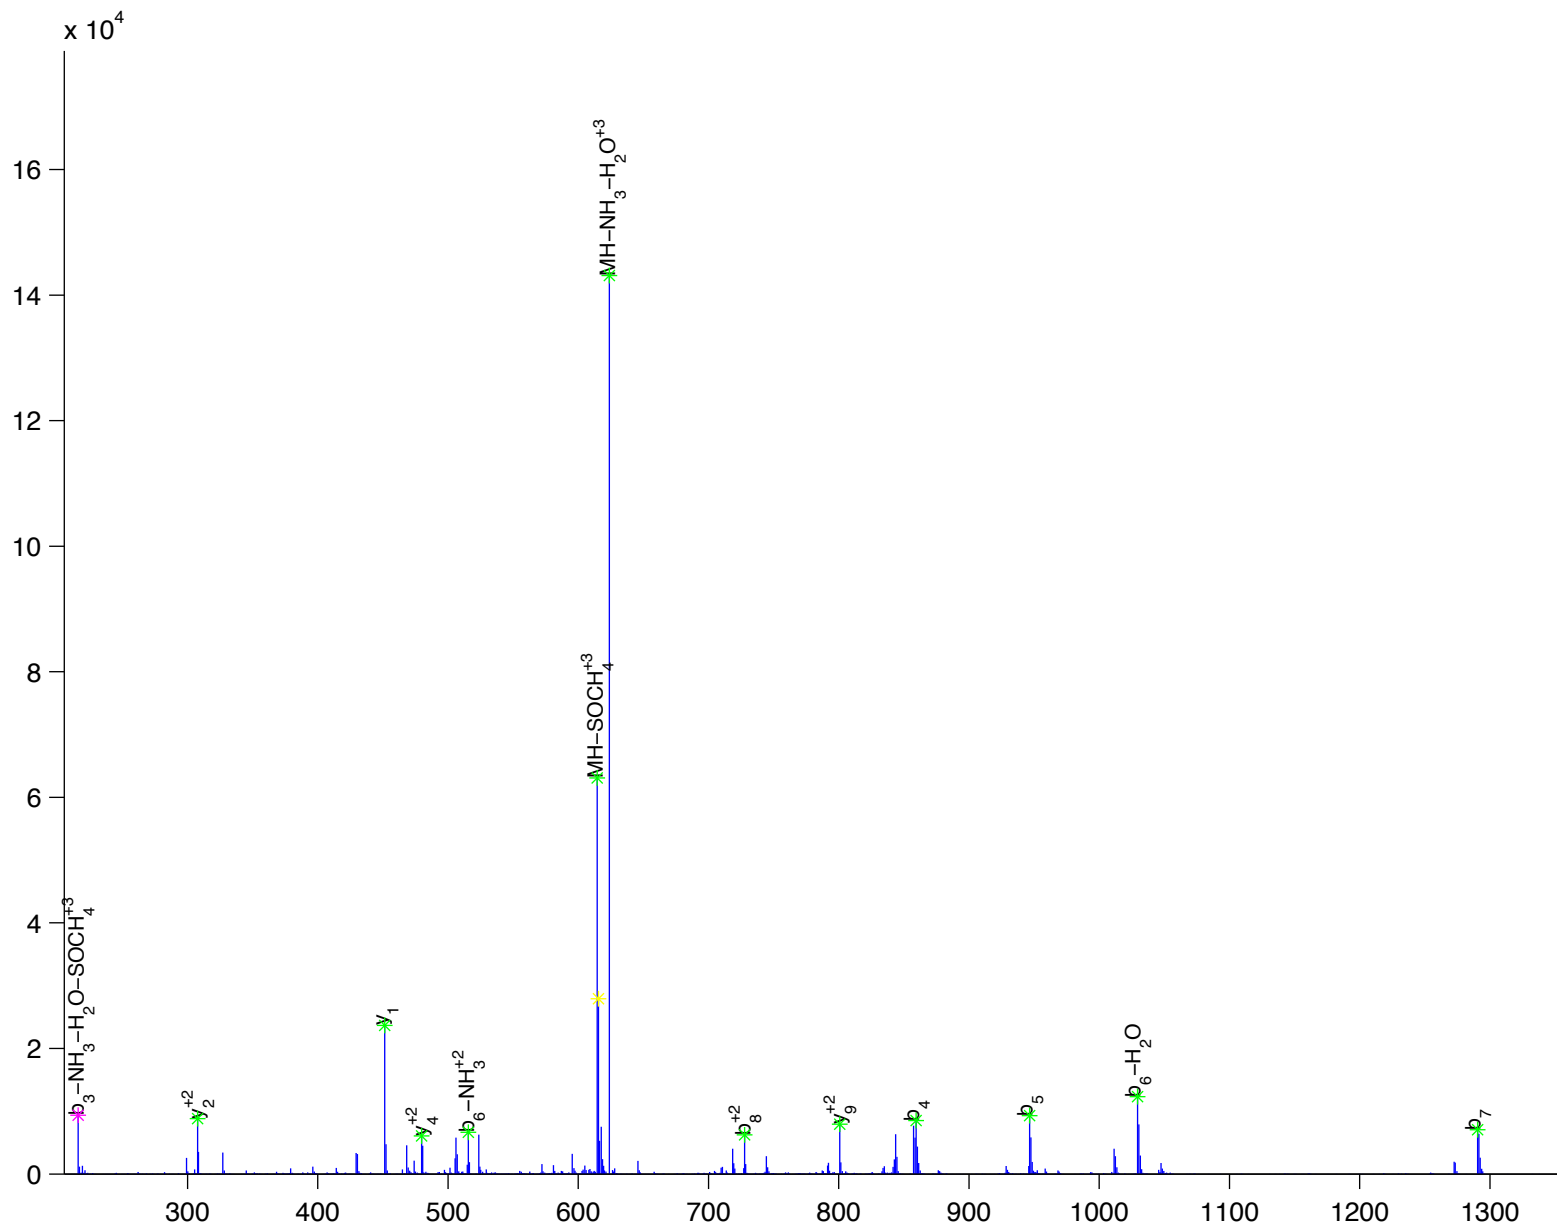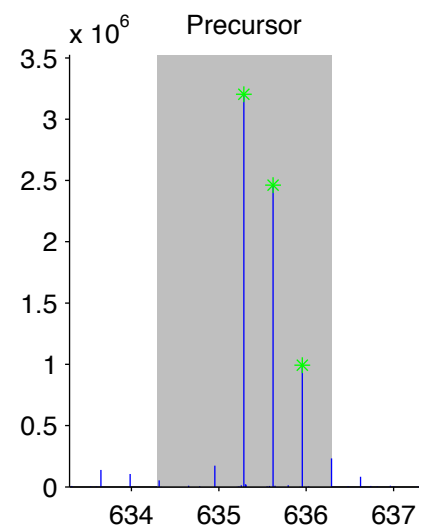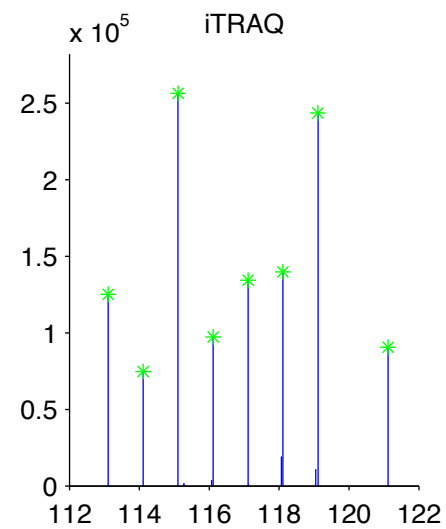

$y$ 
 $\left[ \begin{array}{c} \text{M} \\ \text{E} \\ \text{D} \\ \text{S} \\ \text{T} \\ \text{Y} \\ \text{Y} \end{array} \right] \text{K}$

PTK2 protein tyrosine kinase 2 isoform a [Homo sapiens]

Charge State: +3

Scan Number: 5761

File Name: HJ050711\_GBMxeno\_bio1\_E\_HANNAH.raw

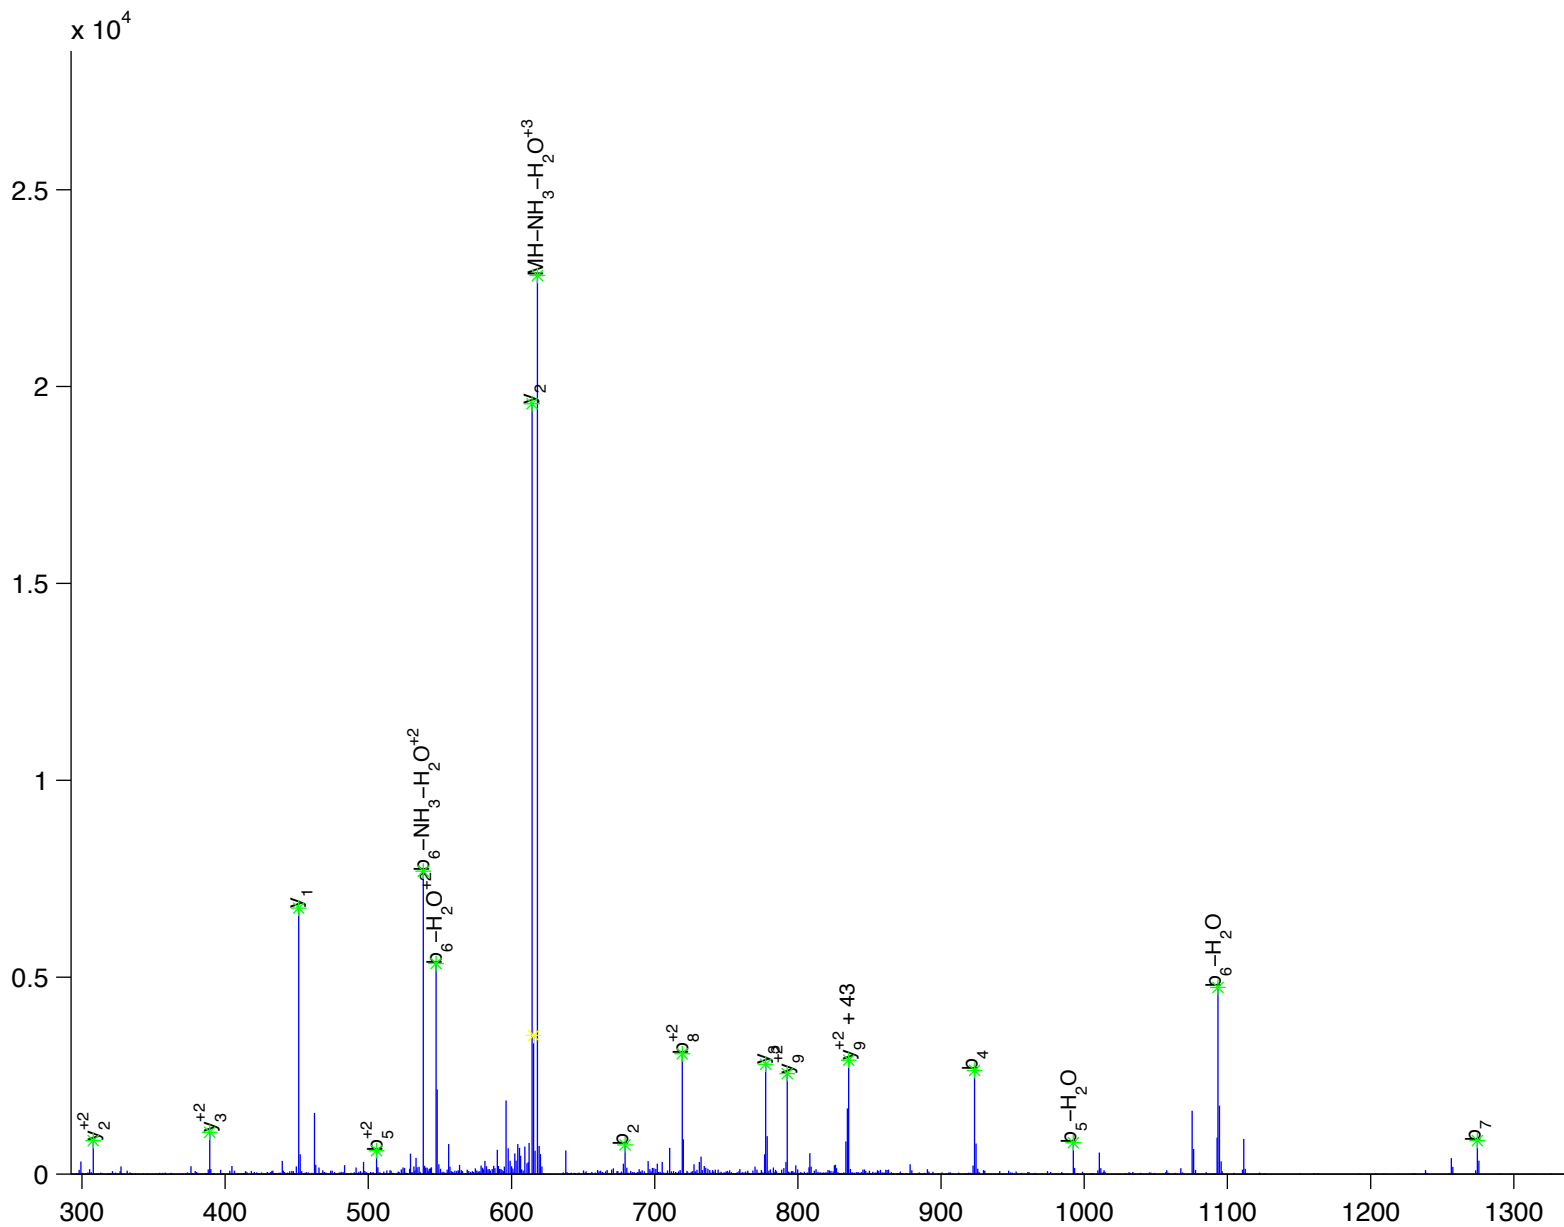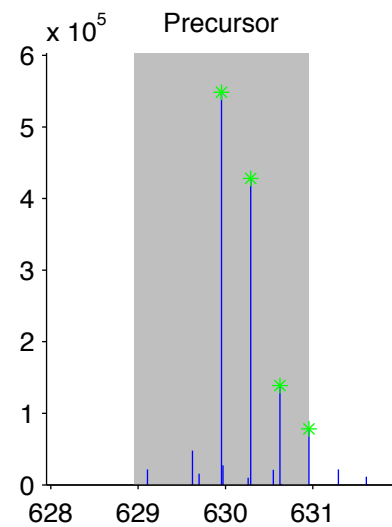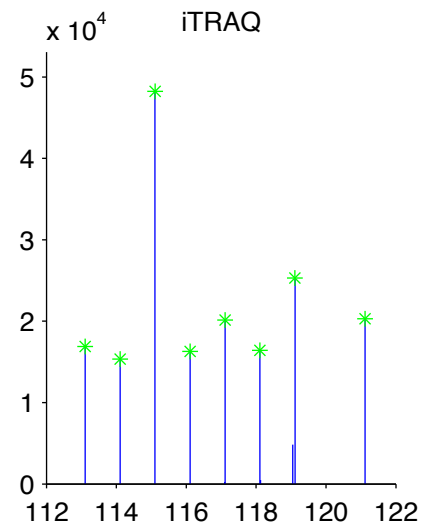

Y[M]E[D]S[T]yYK

PTK2 protein tyrosine kinase 2 isoform a [Homo sapiens]

Charge State: +2

Scan Number: 6051

File Name: HJ050711\_GBMxeno\_bio1\_E\_HANNAH.raw

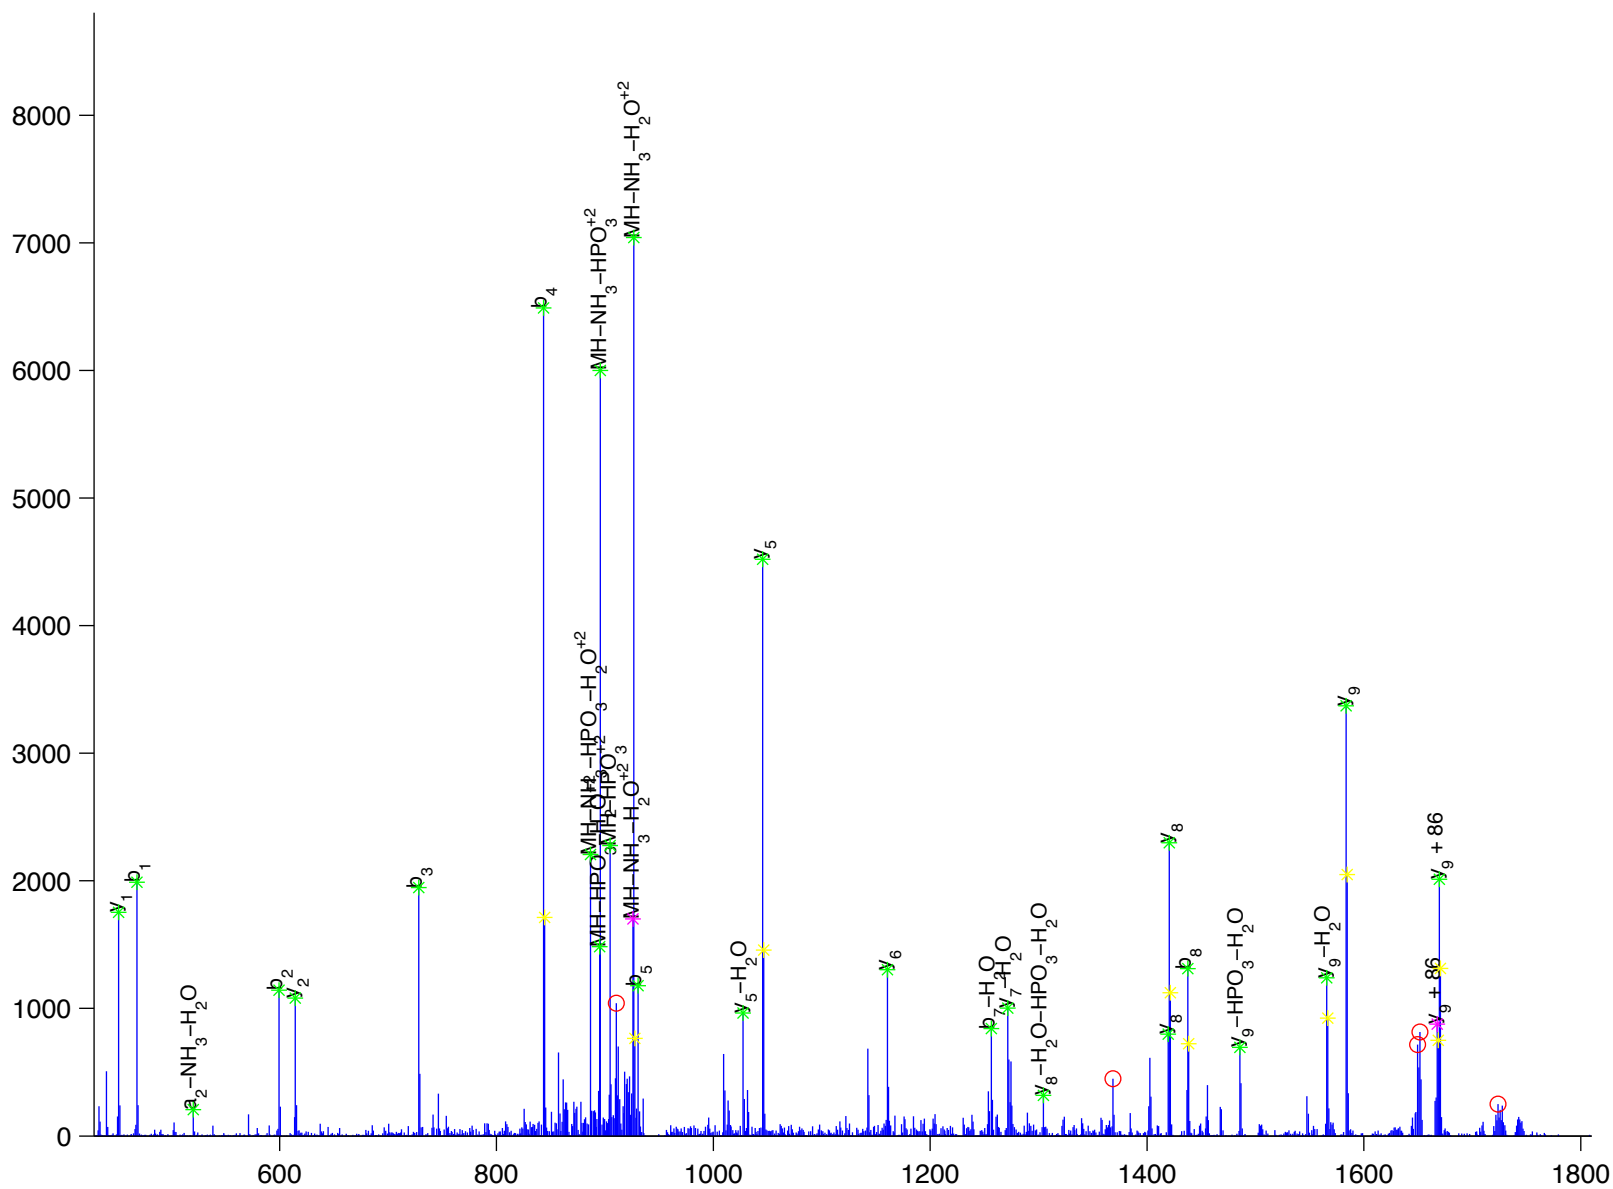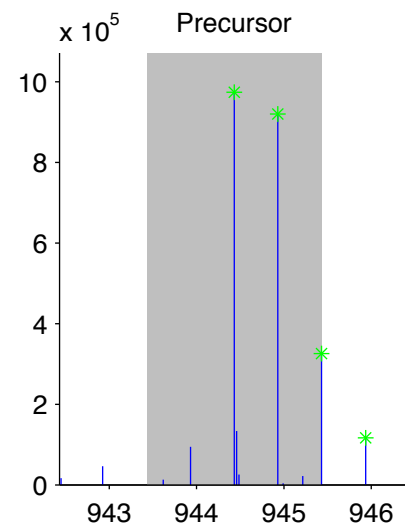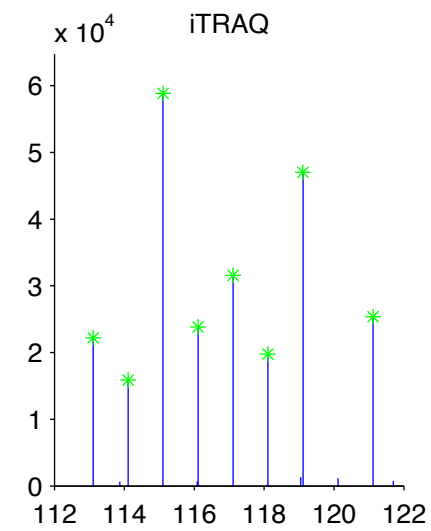

Y [ M ] E [ D ] S [ T ] y [ Y ] K

PTK2 protein tyrosine kinase 2 isoform a [Homo sapiens]

Charge State: +2

Scan Number: 6080

File Name: HJ050711\_GBMxeno\_bio1\_E\_HANNAH.raw

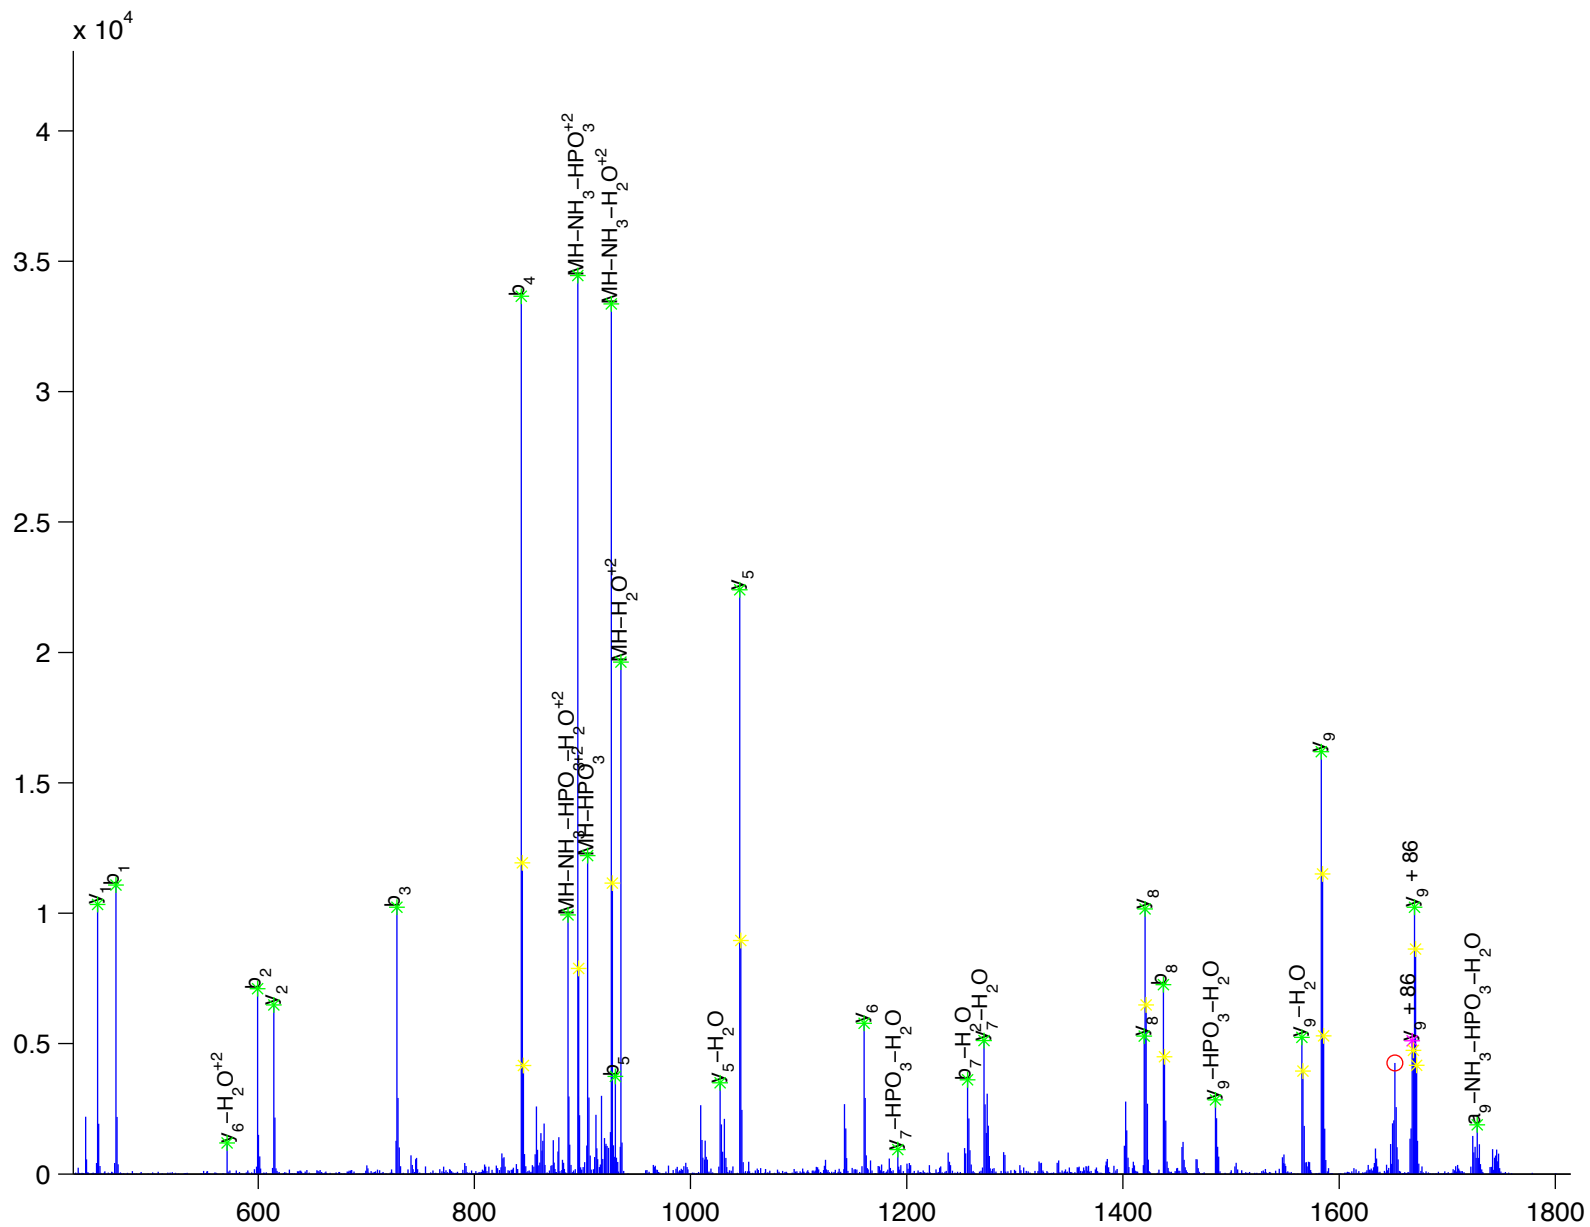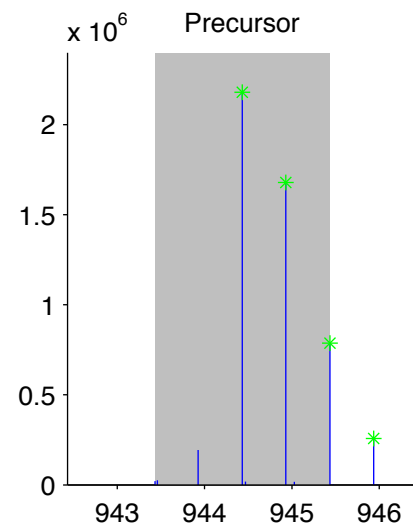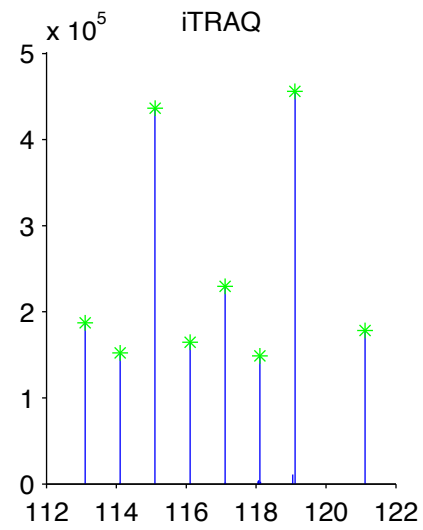

T H A V S V S E T D D y A E I I D E E D T Y T m P S T R

PTK2 protein tyrosine kinase 2 isoform a [Homo sapiens]

Charge State: +3

Scan Number: 6855

File Name: HJ050711\_GBMxeno\_bio1\_E\_HANNAH.raw

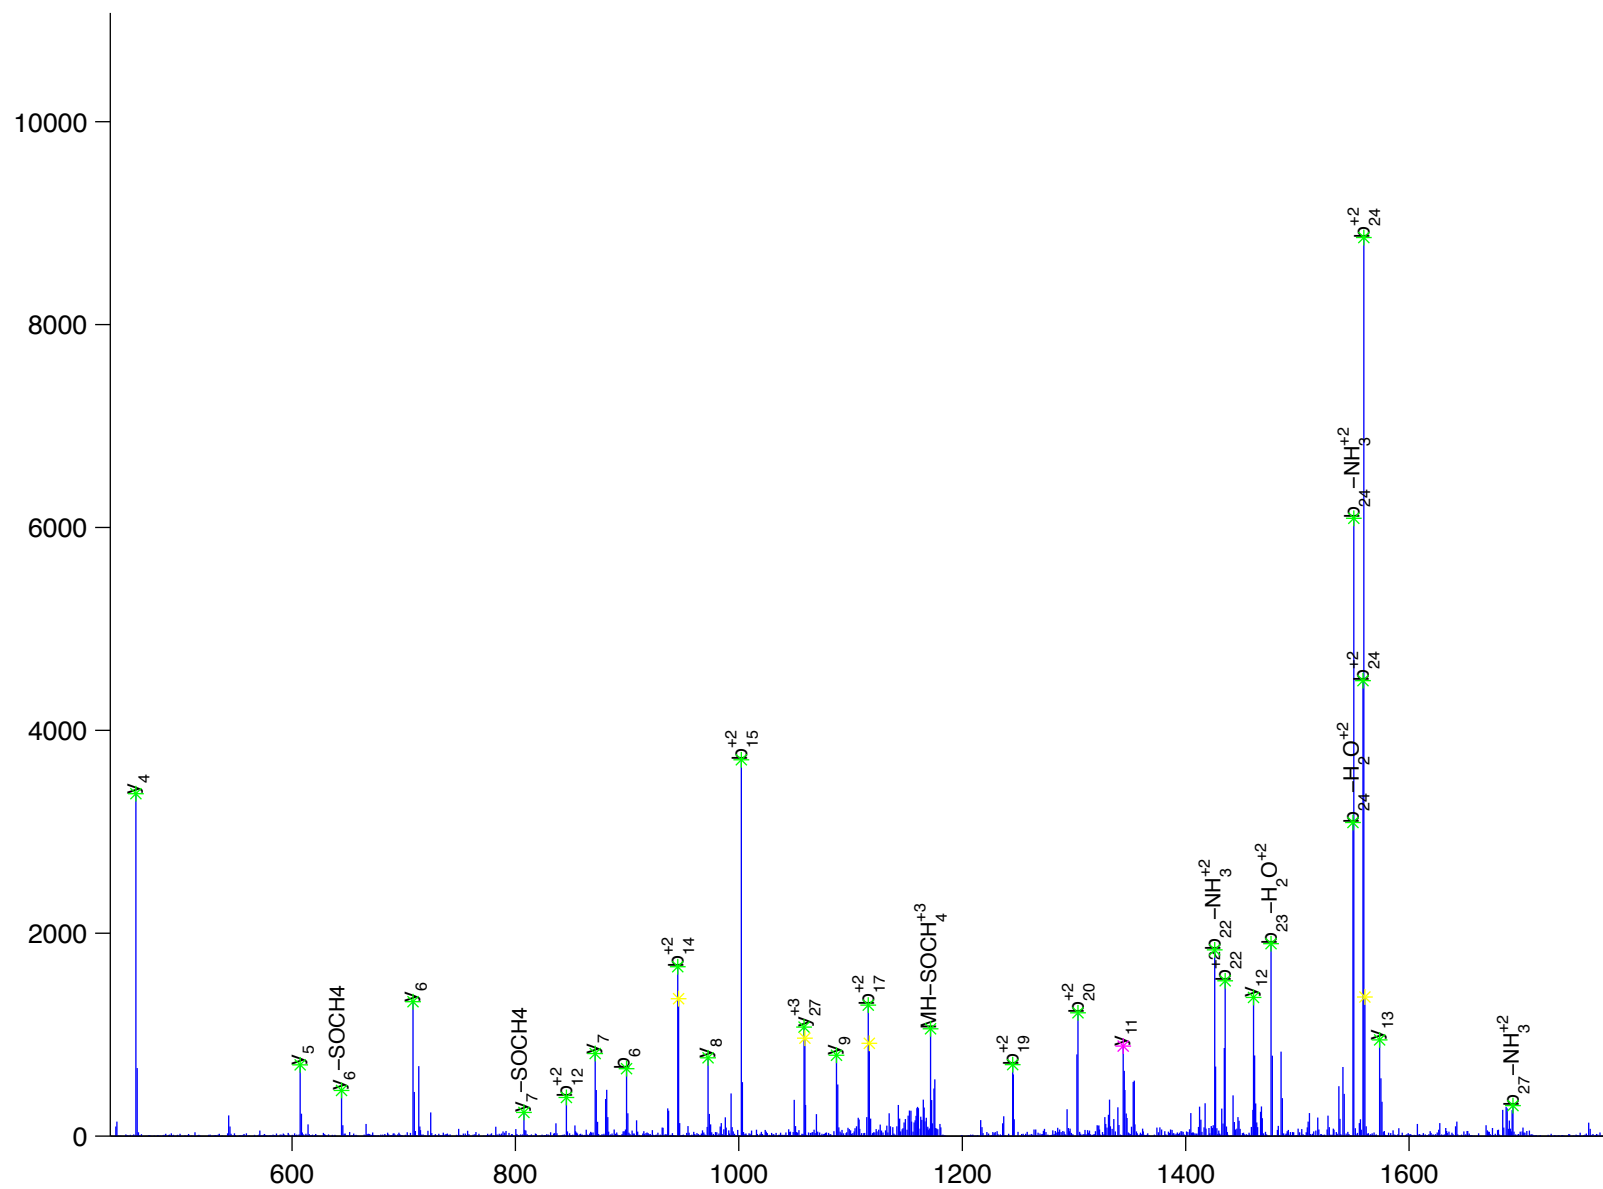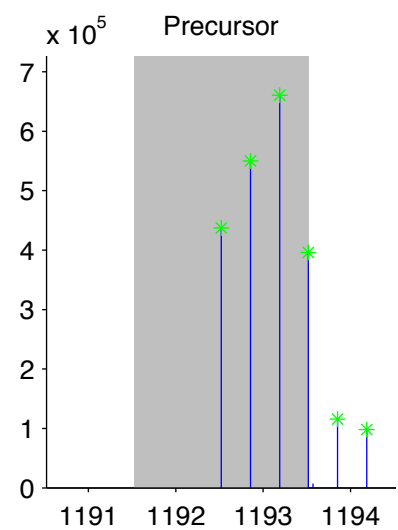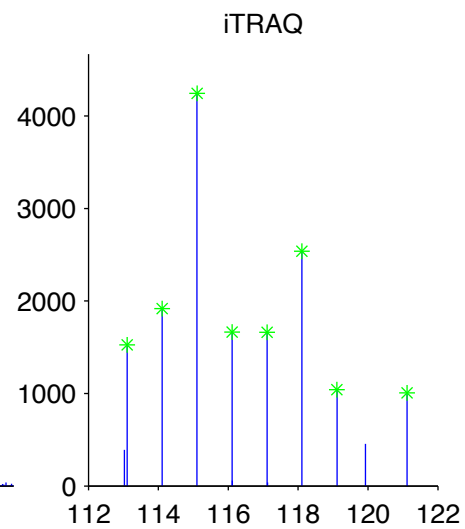

T [ H ] A [ V ] S [ V ] S [ E ] T [ D ] D [ y ] A [ E ] I [ I ] D [ E ] E [ D ] T [ Y ] T [ M ] P [ S ] T [ R ]

PTK2 protein tyrosine kinase 2 isoform a [Homo sapiens]

Charge State: +3

Scan Number: 7229

File Name: HJ050711\_GBMxeno\_bio1\_E\_HANNAH.raw

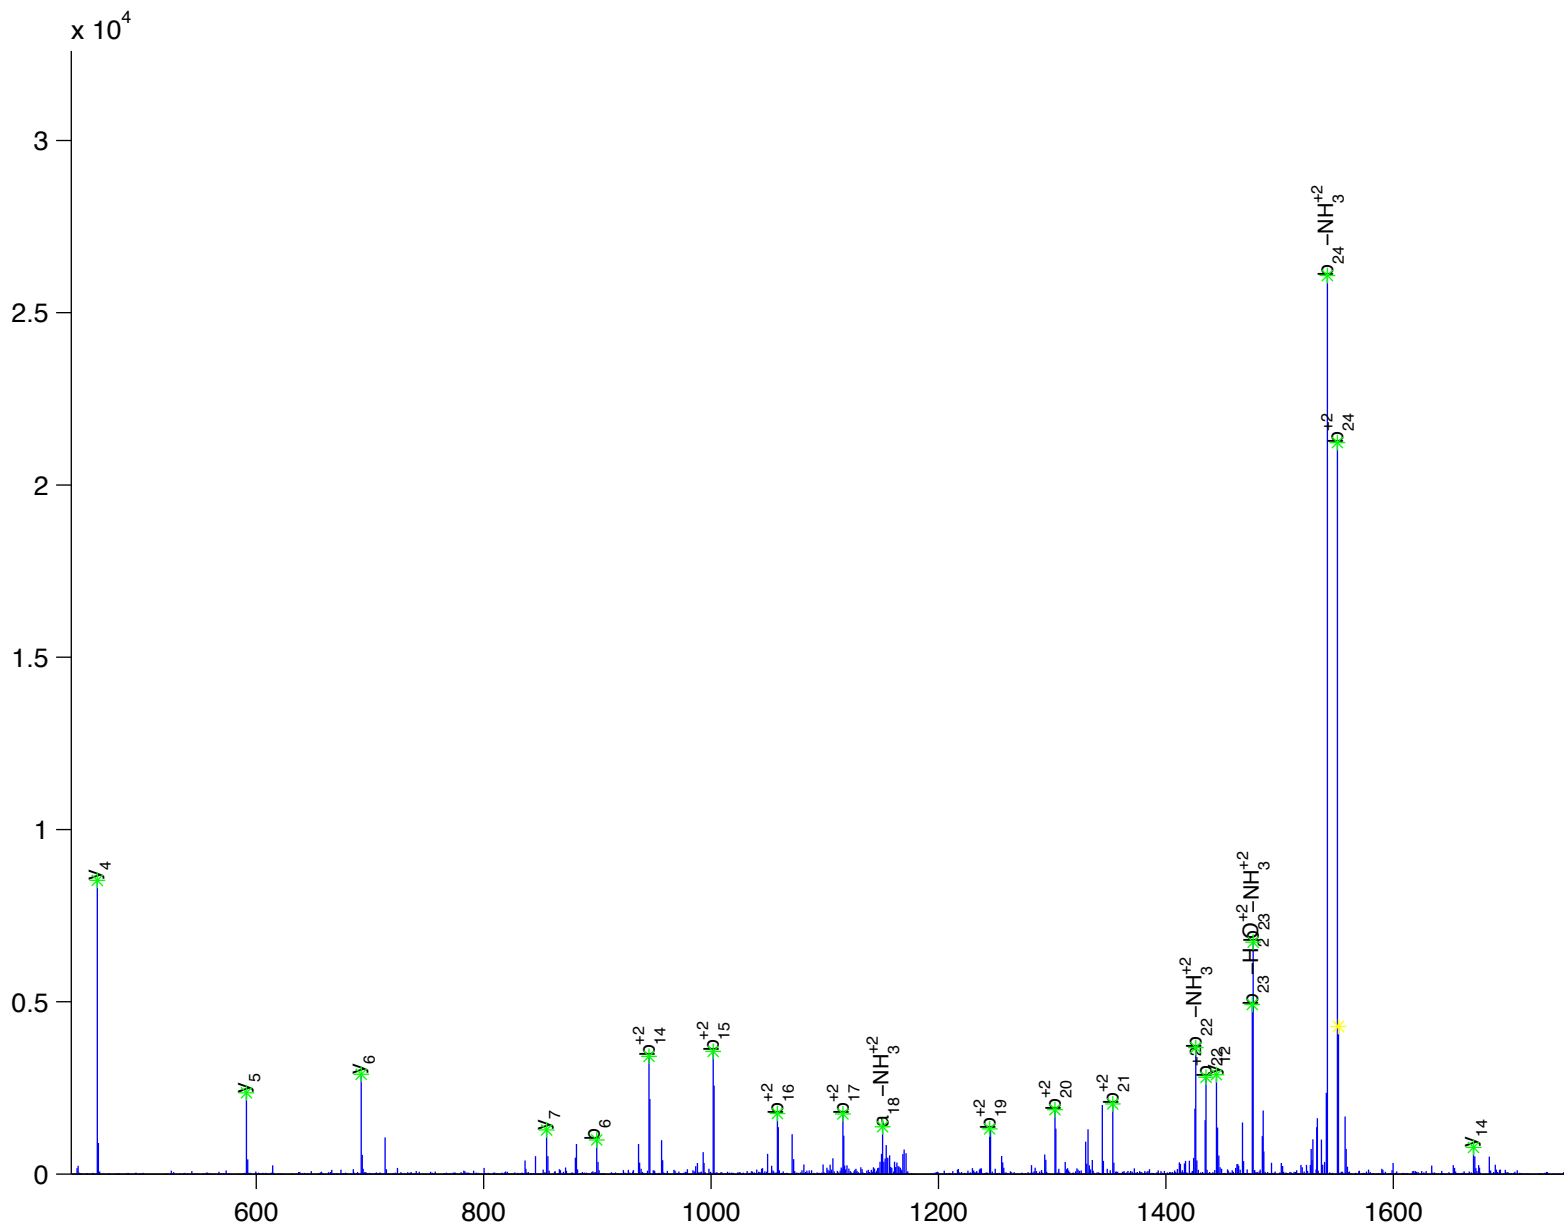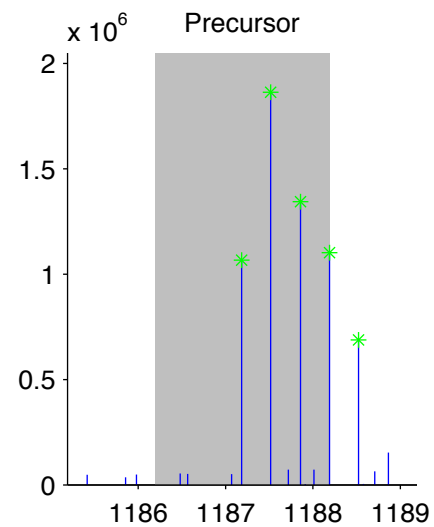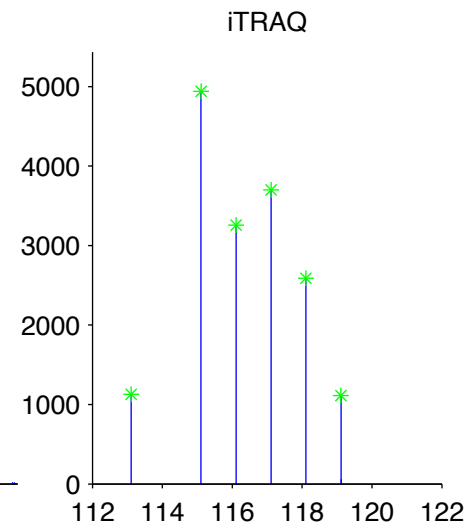



T[A]T[E]S[F]A[S]D[P]I[L]y[R]P[V]A[V]A[L]D[T]K

pyruvate kinase, muscle isoform 1 [Homo sapiens]

Charge State: +4

Scan Number: 8665

File Name: HJ050711\_GBMxeno\_bio1\_E\_HANNAH.raw

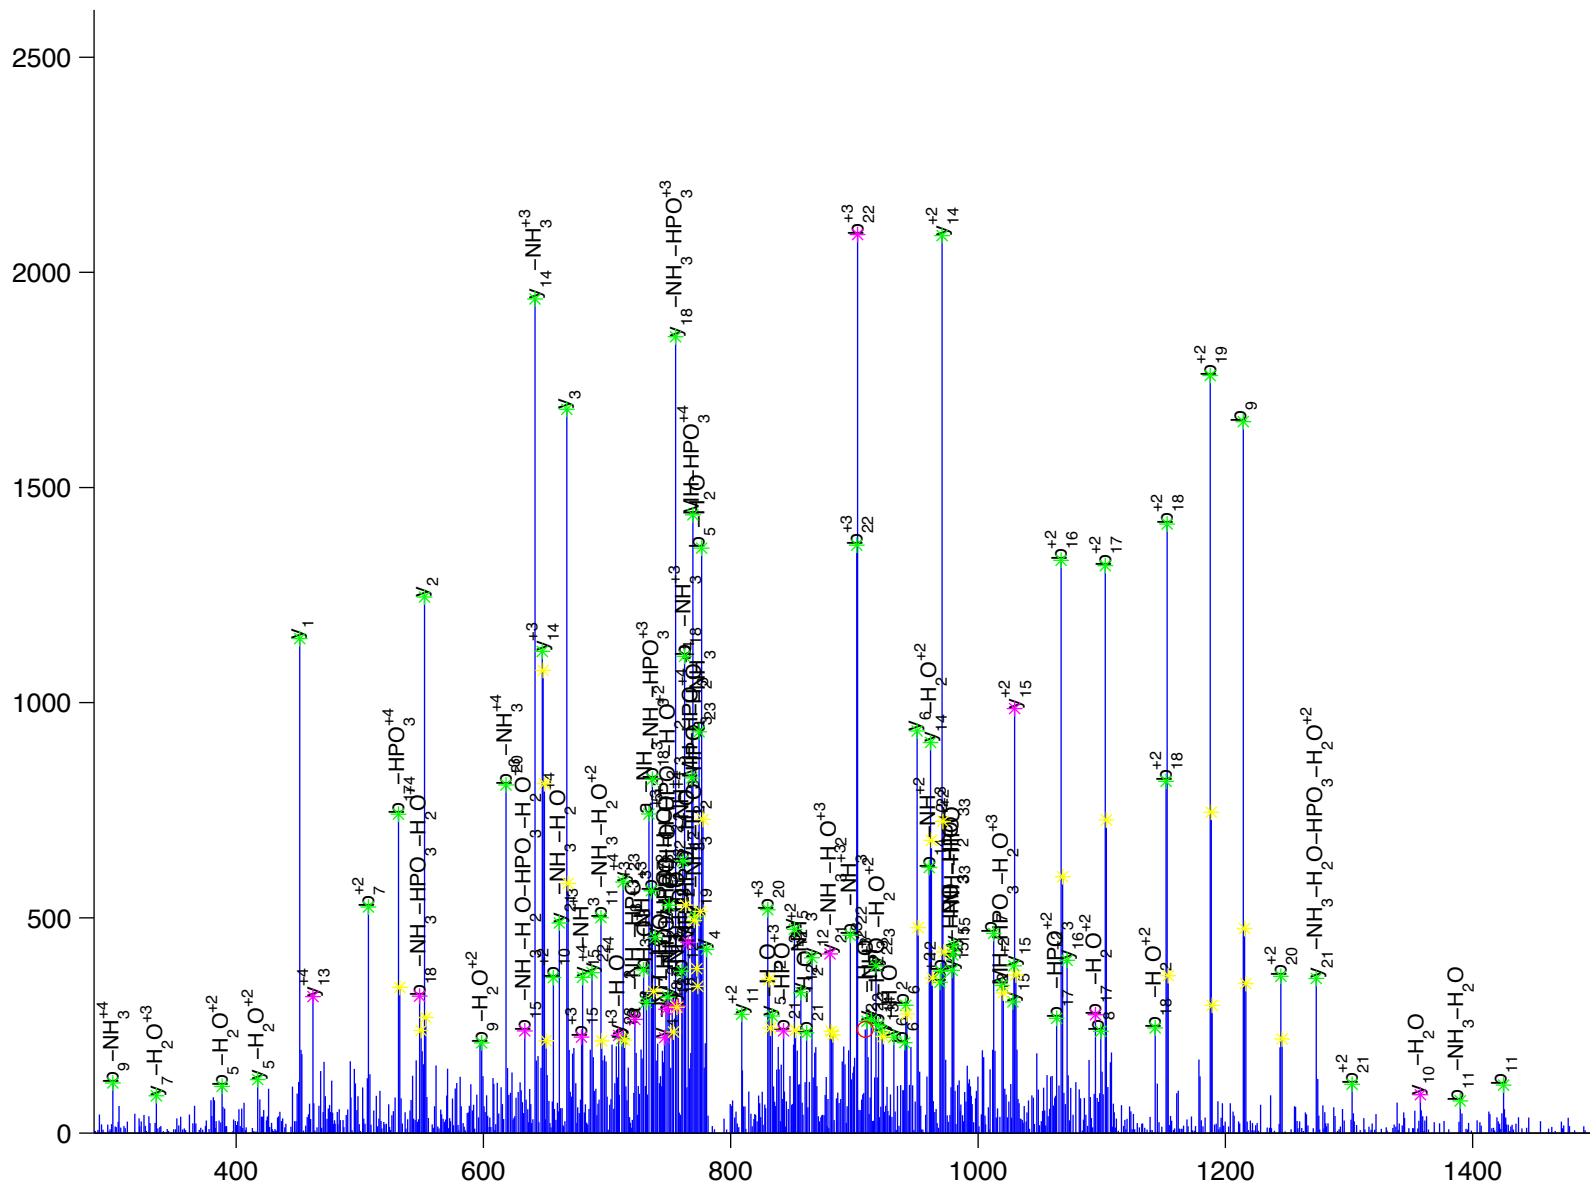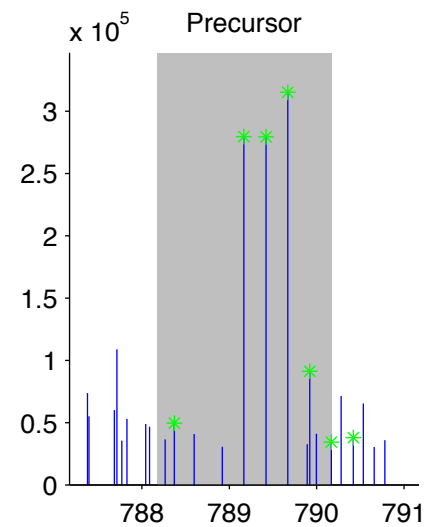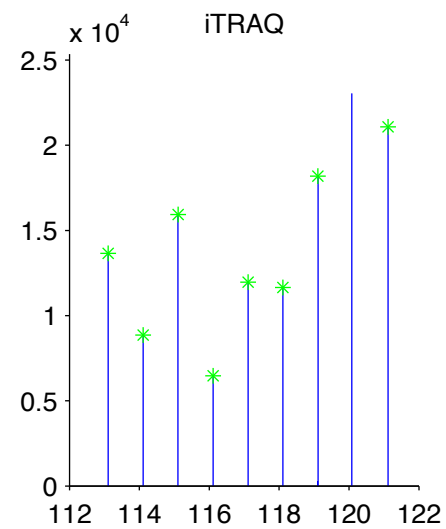

T[A]T[E]S[F]A[S]D[P]I[L]yR[P]V[A]V[A]L[D]T]K

pyruvate kinase, muscle isoform 1 [Homo sapiens]

Charge State: +3

Scan Number: 8682

File Name: HJ050711\_GBMxeno\_bio1\_E\_HANNAH.raw

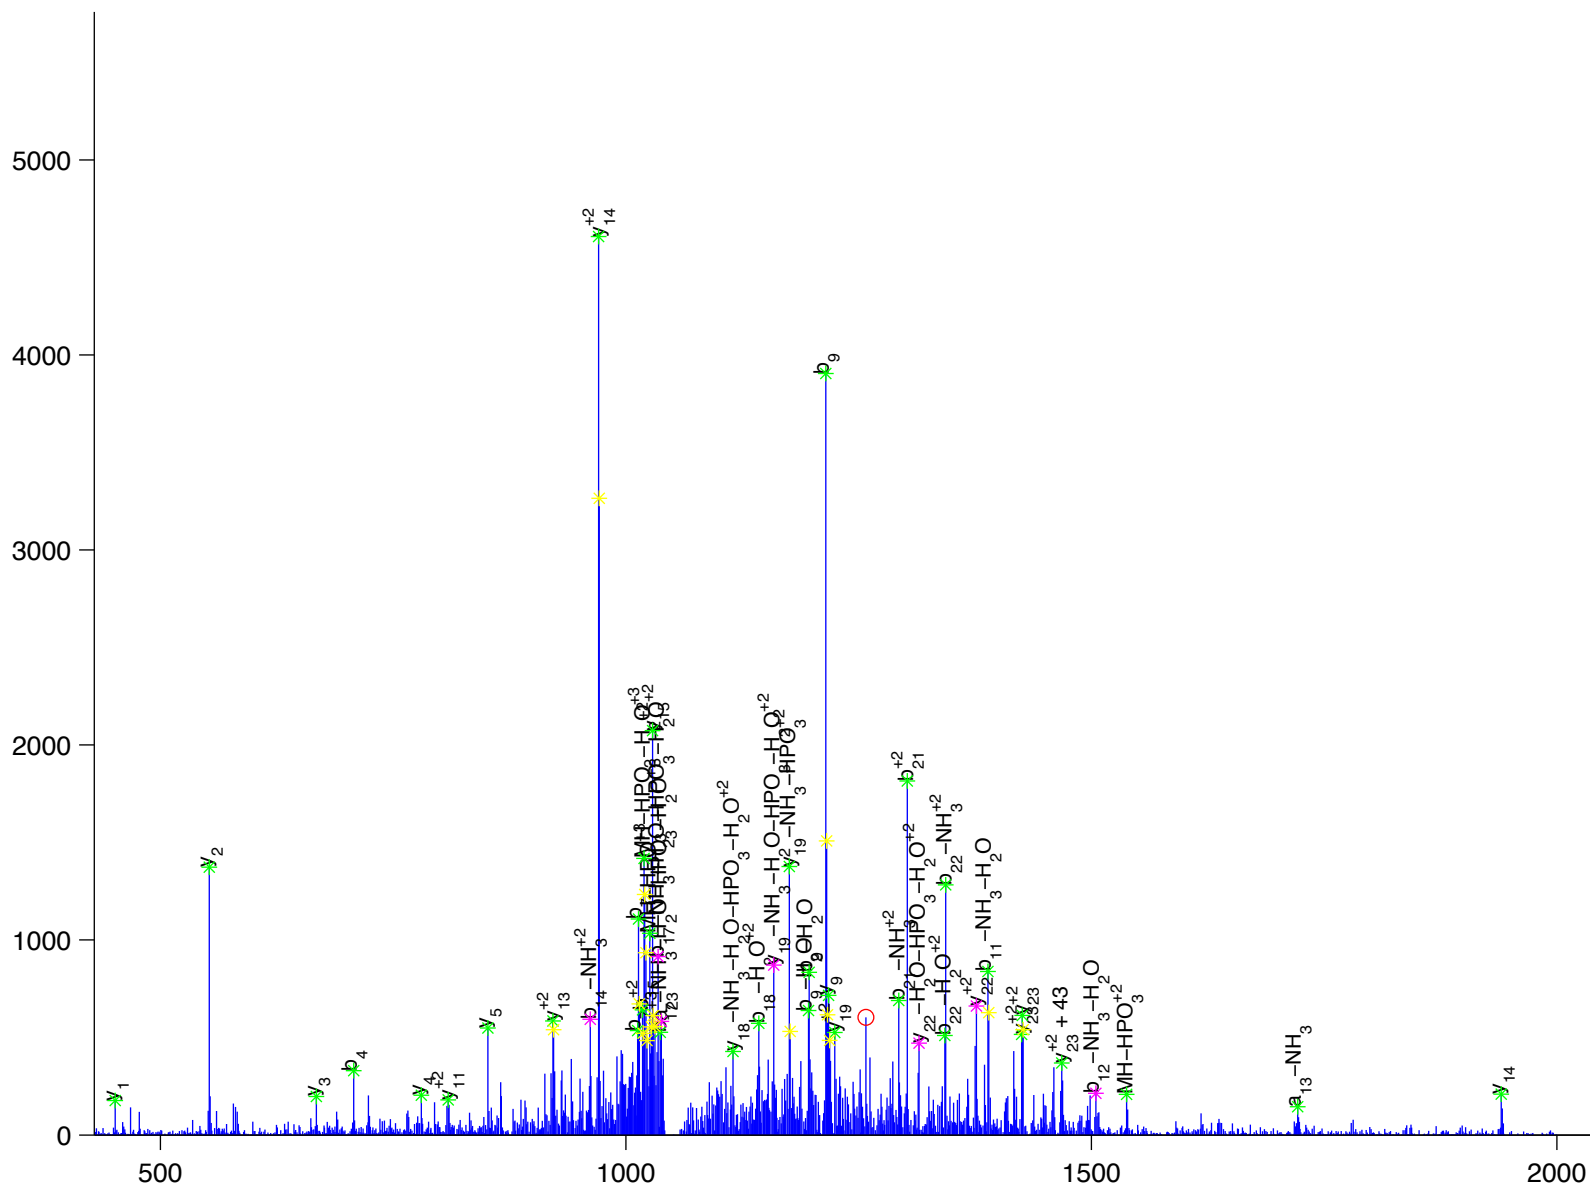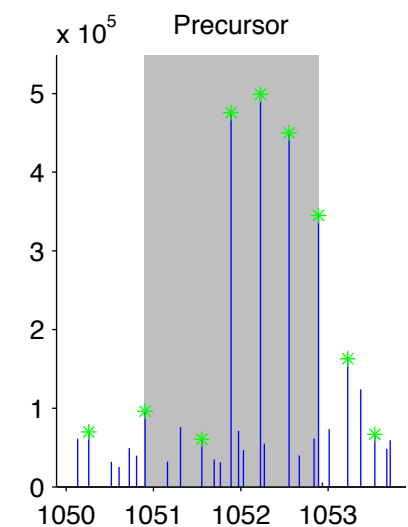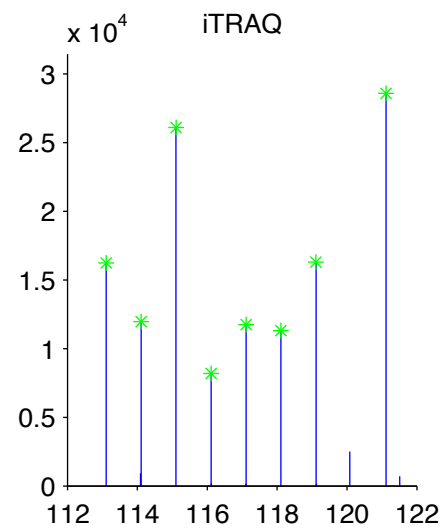

I [y] V [D] [D] [G] [L] [I] [S] [L] [Q] [V] K

pyruvate kinase, muscle isoform 1 [Homo sapiens]

Charge State: +3

Scan Number: 9224

File Name: HJ050711\_GBMxeno\_bio1\_E\_HANNAH.raw

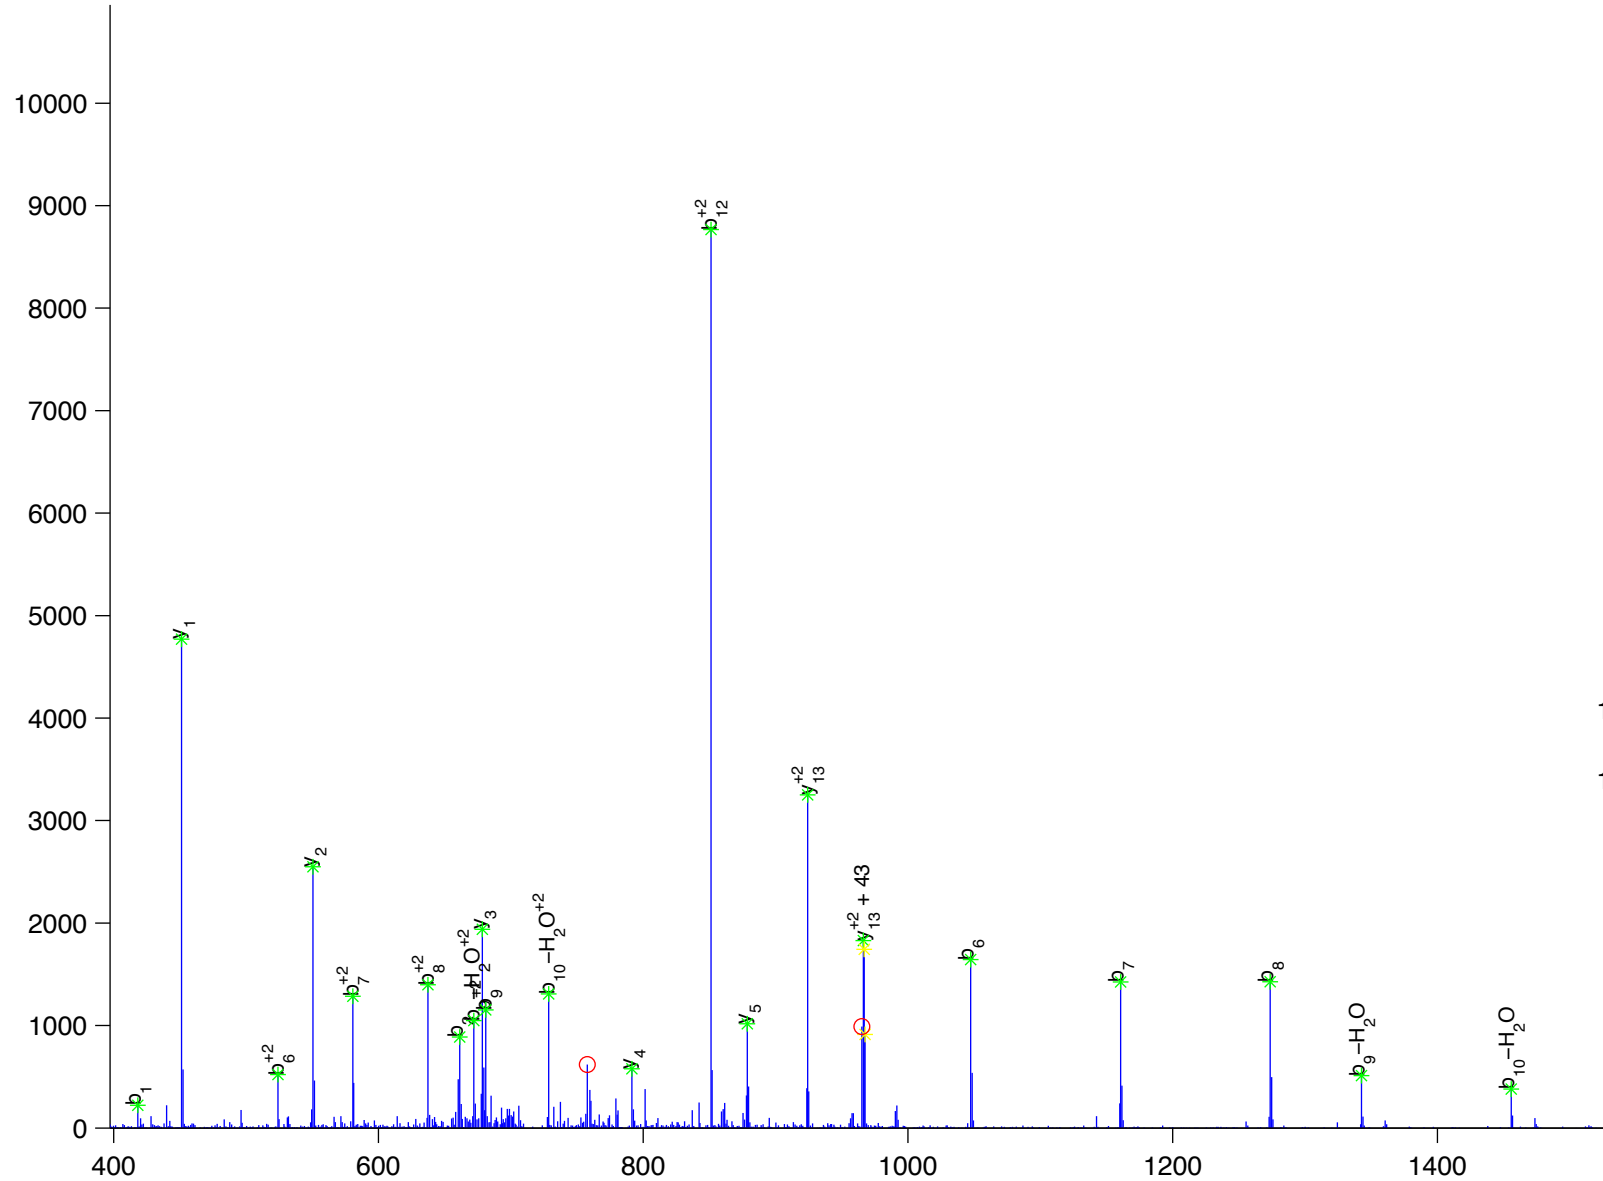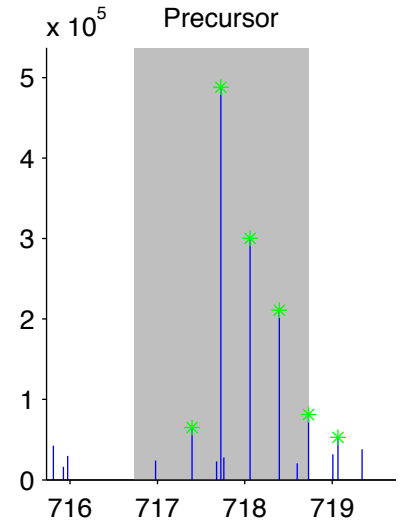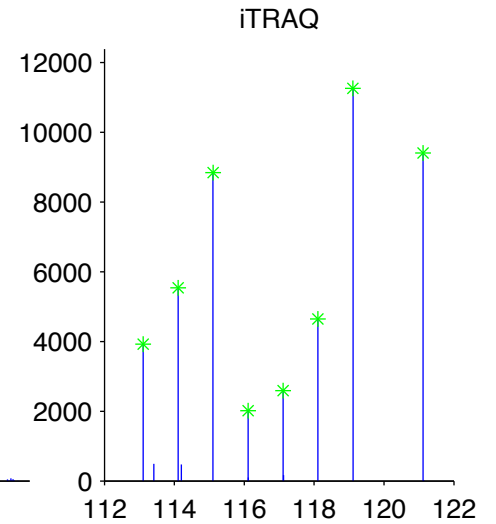

I [ y ] V [ D ] D [ G ] L [ L ] I [ S ] L [ Q ] V [ K ]

pyruvate kinase, muscle isoform 1 [Homo sapiens]

Charge State: +2

Scan Number: 9243

File Name: HJ050711\_GBMxeno\_bio1\_E\_HANNAH.raw

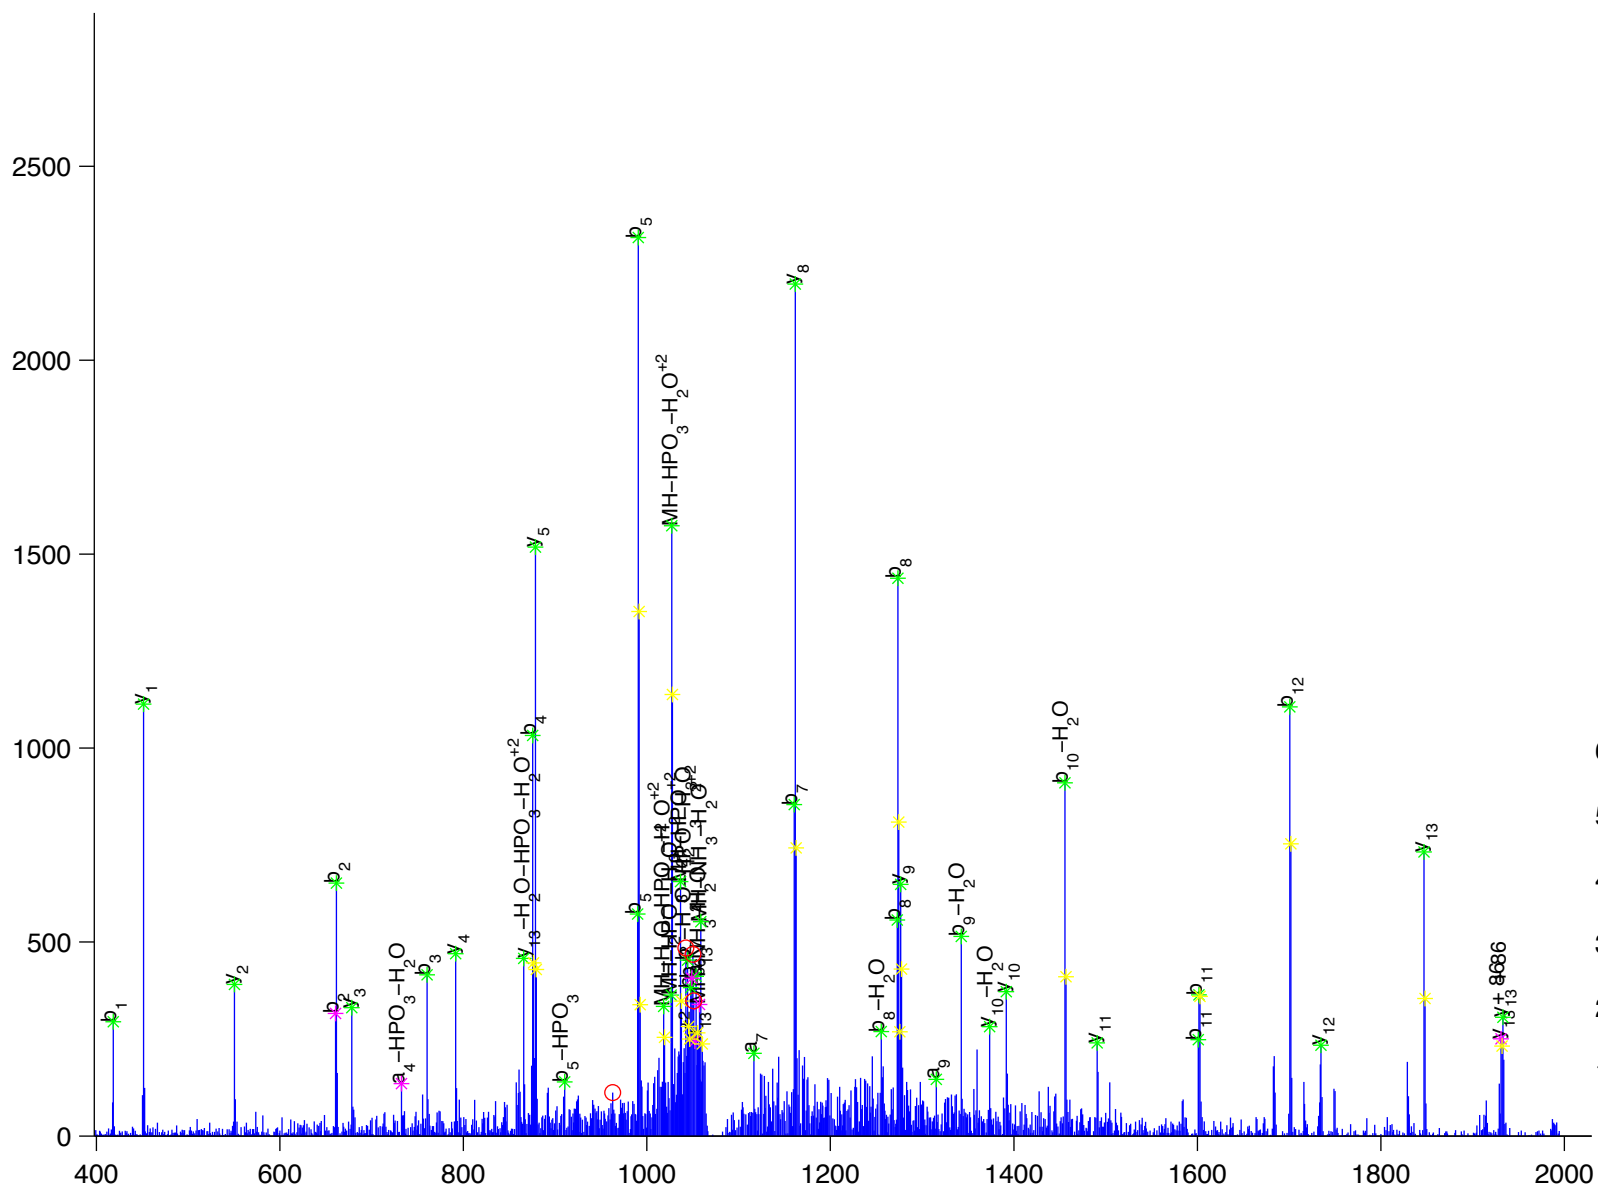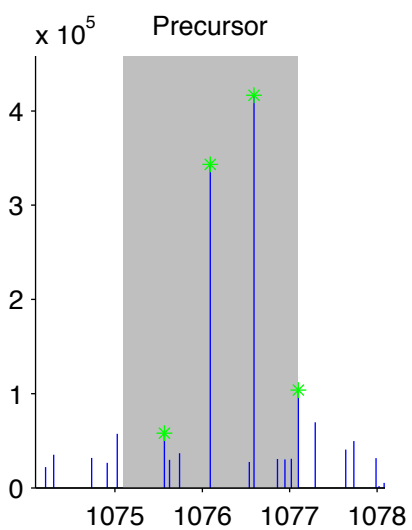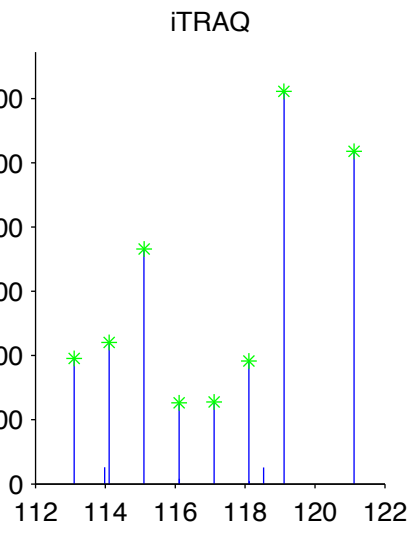

N[S]Q[E]A[E]V[S]c[P]F[I]D[N]T[y]S[c]S[G]K

RanBP-type and C3HC4-type zinc finger containing 1 isoform 1 [Homo sapiens]

Charge State: +3

Scan Number: 6584

File Name: HJ050711\_GBMxeno\_bio1\_E\_HANNAH.raw

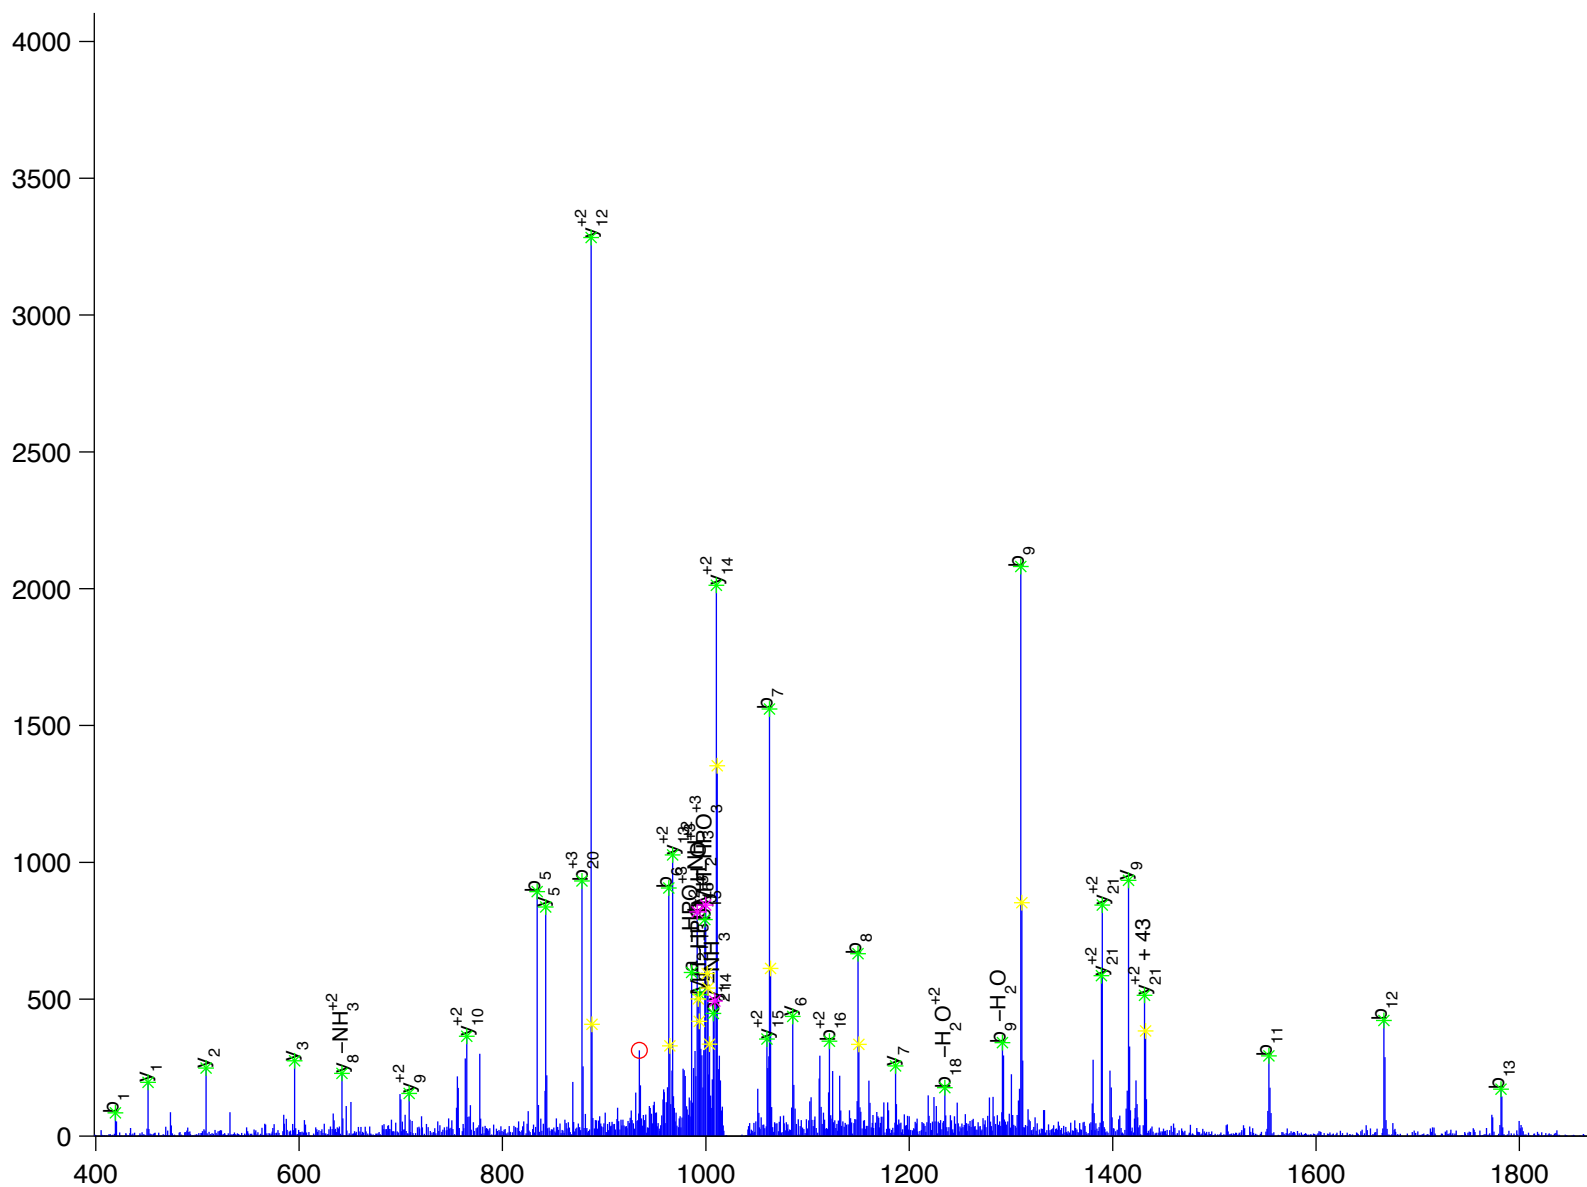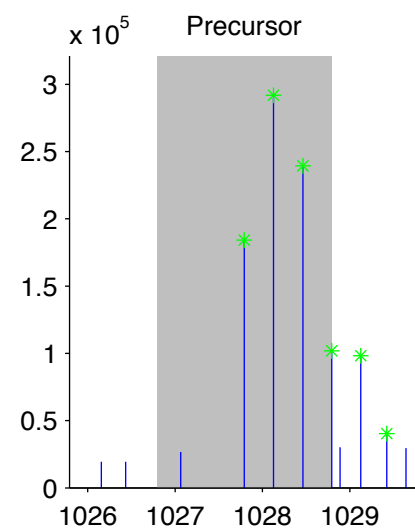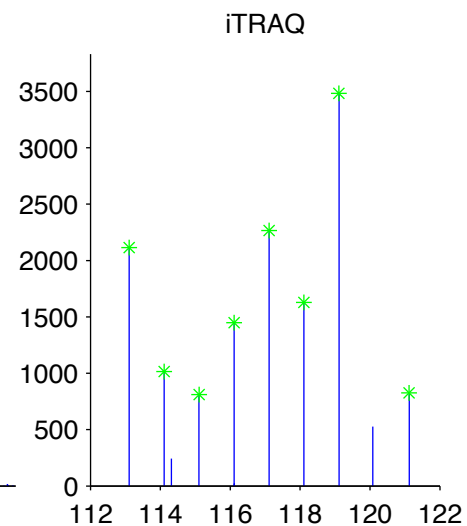

E [ K ] P [ A ] Q [ D ] P [ L ] y [ D ] V [ P ] N [ A ] S [ G ] G [ Q ] A [ G ] G [ P ] Q [ R ] P [ G ] R

ras inhibitor RIN1 [Homo sapiens]

Charge State: +4

Scan Number: 6181

File Name: HJ050711\_GBMxeno\_bio1\_E\_HANNAH.raw

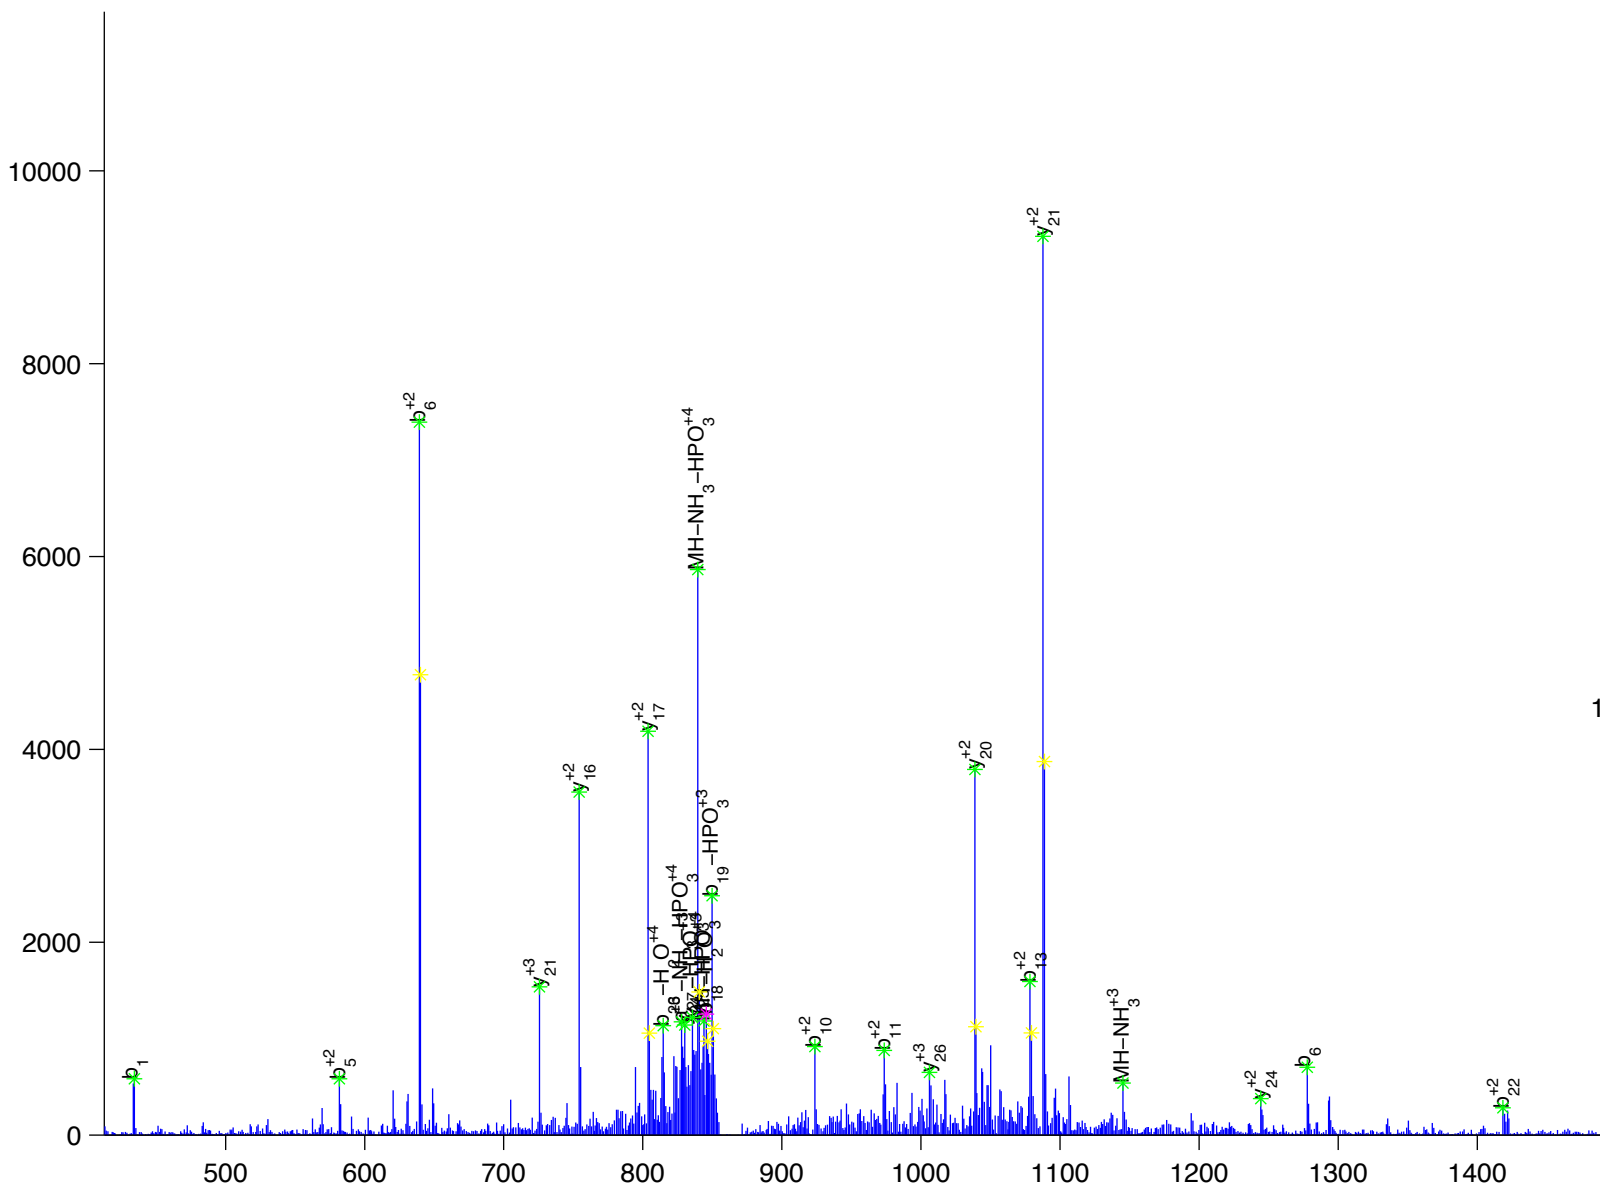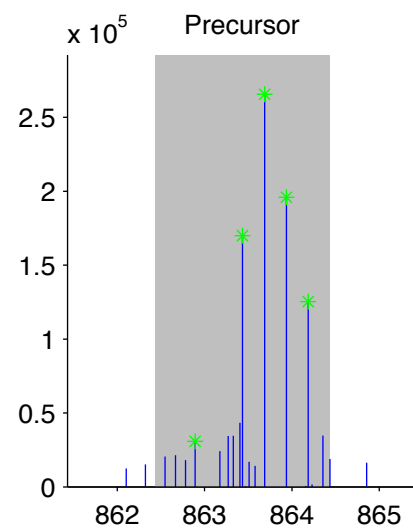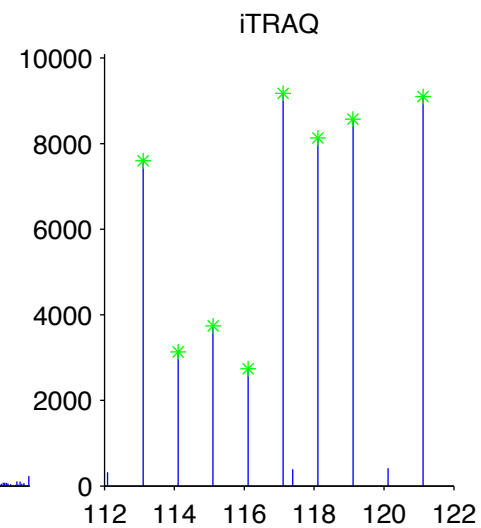

Y [ Q ] F [ V ] R [ E ] P [ E ] D [ E ] E [ E ] E [ E ] E [ E ] E [ E ] E [ E ] E [ D ] E [ D ] E [ D ] L [ E ] E [ L ] E [ V ] L [ E ] R

reticulon 4 isoform B [Homo sapiens]

Charge State: +3

Scan Number: 8802

File Name: HJ050711\_GBMxeno\_bio1\_E\_HANNAH.raw

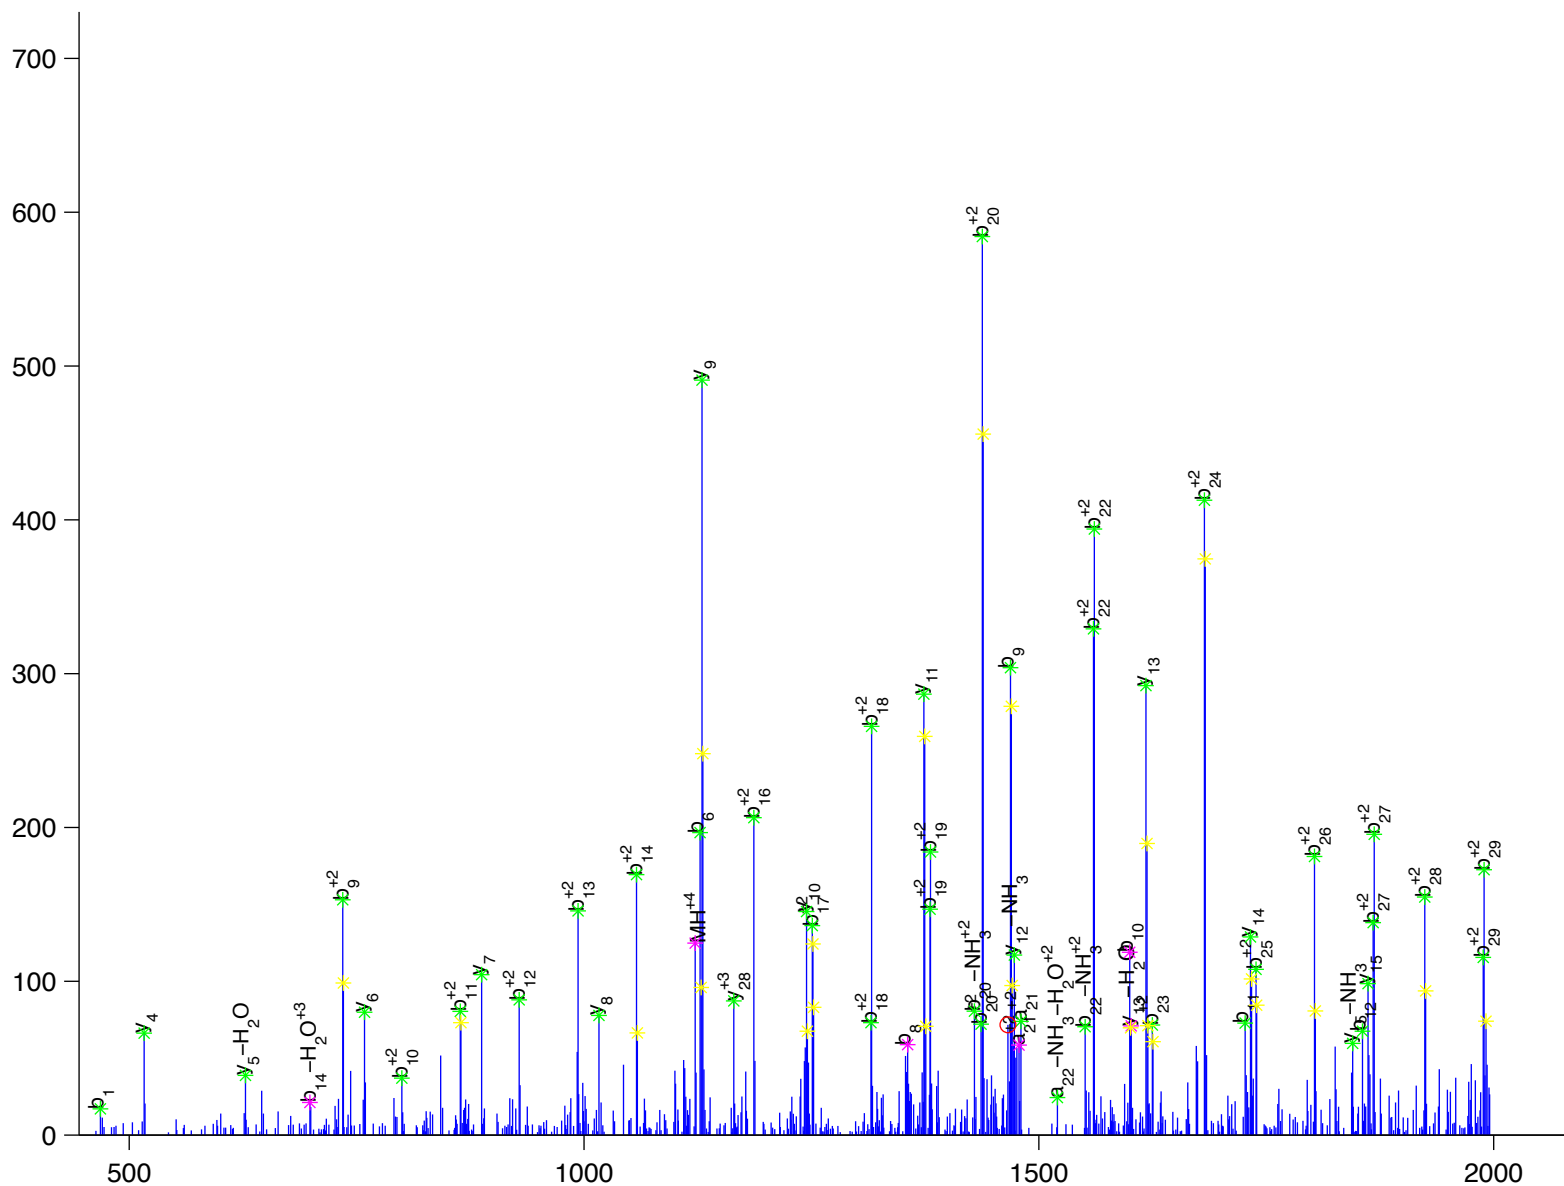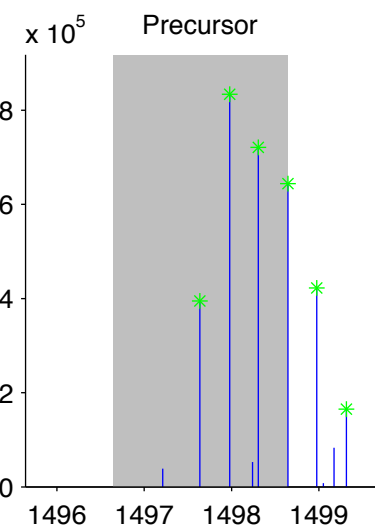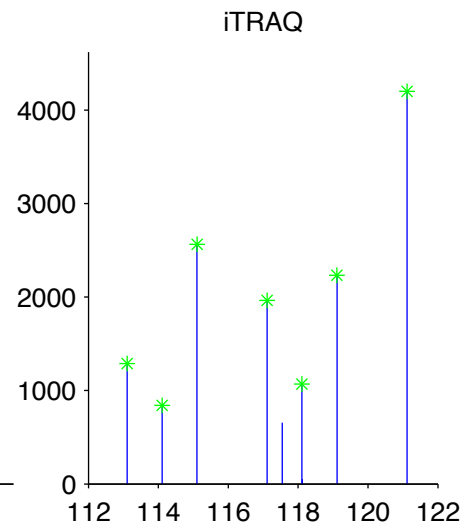

I [y] E [S] I [E] E [A] K

Rho-associated, coiled-coil containing protein kinase 2 [Homo sapiens]

Charge State: +3

Scan Number: 7067

File Name: HJ050711\_GBMxeno\_bio1\_E\_HANNAH.raw

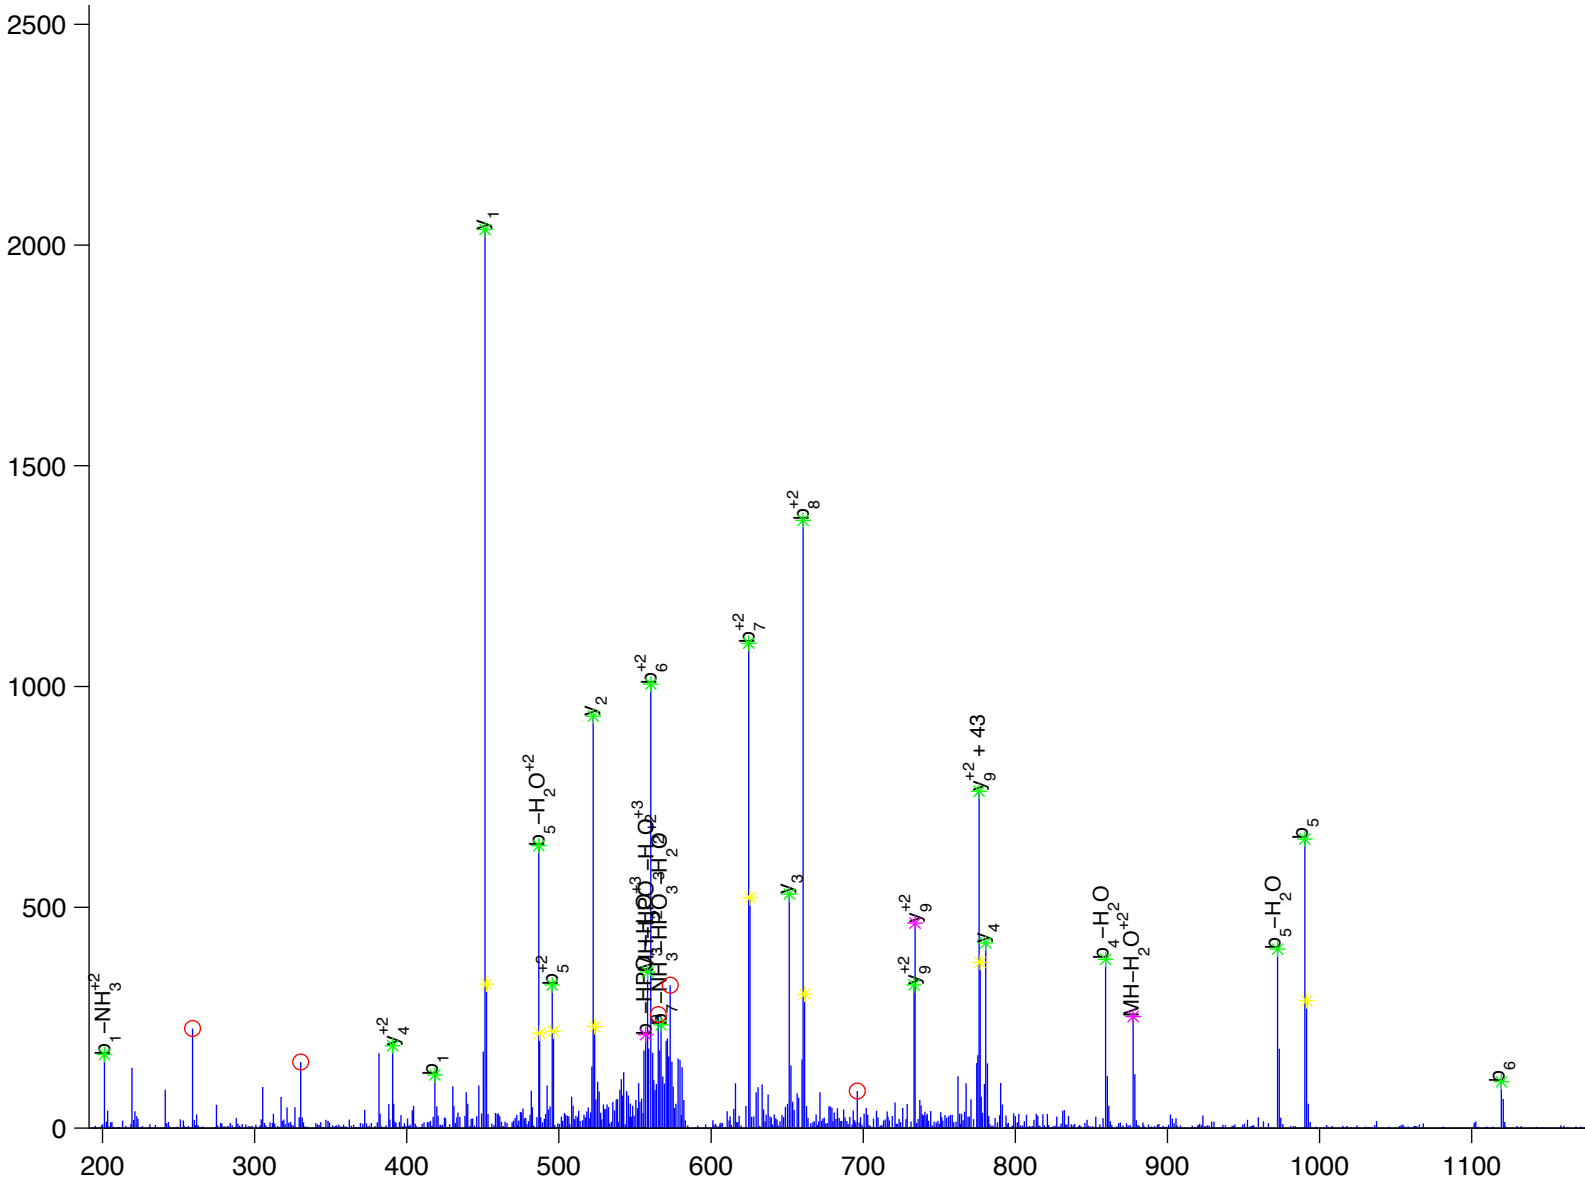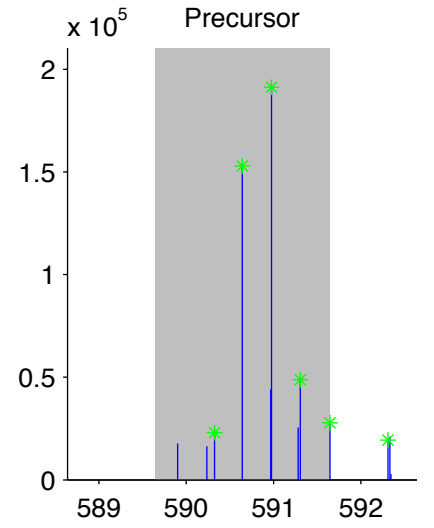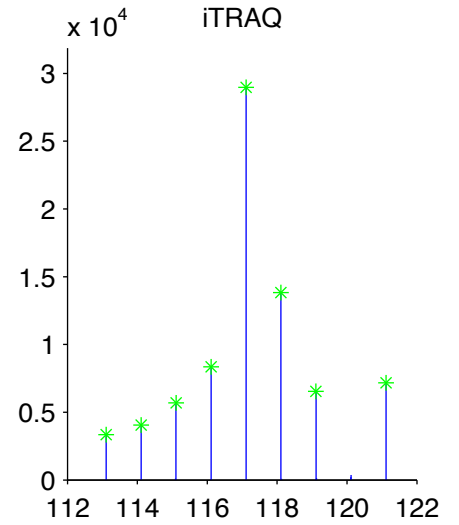



L[V]Q[S]P[N]S[y]F[M]D[V]K

ribosomal protein S27 [Homo sapiens]

Charge State: +3

Scan Number: 7983

File Name: HJ050711\_GBMxeno\_bio1\_E\_HANNAH.raw

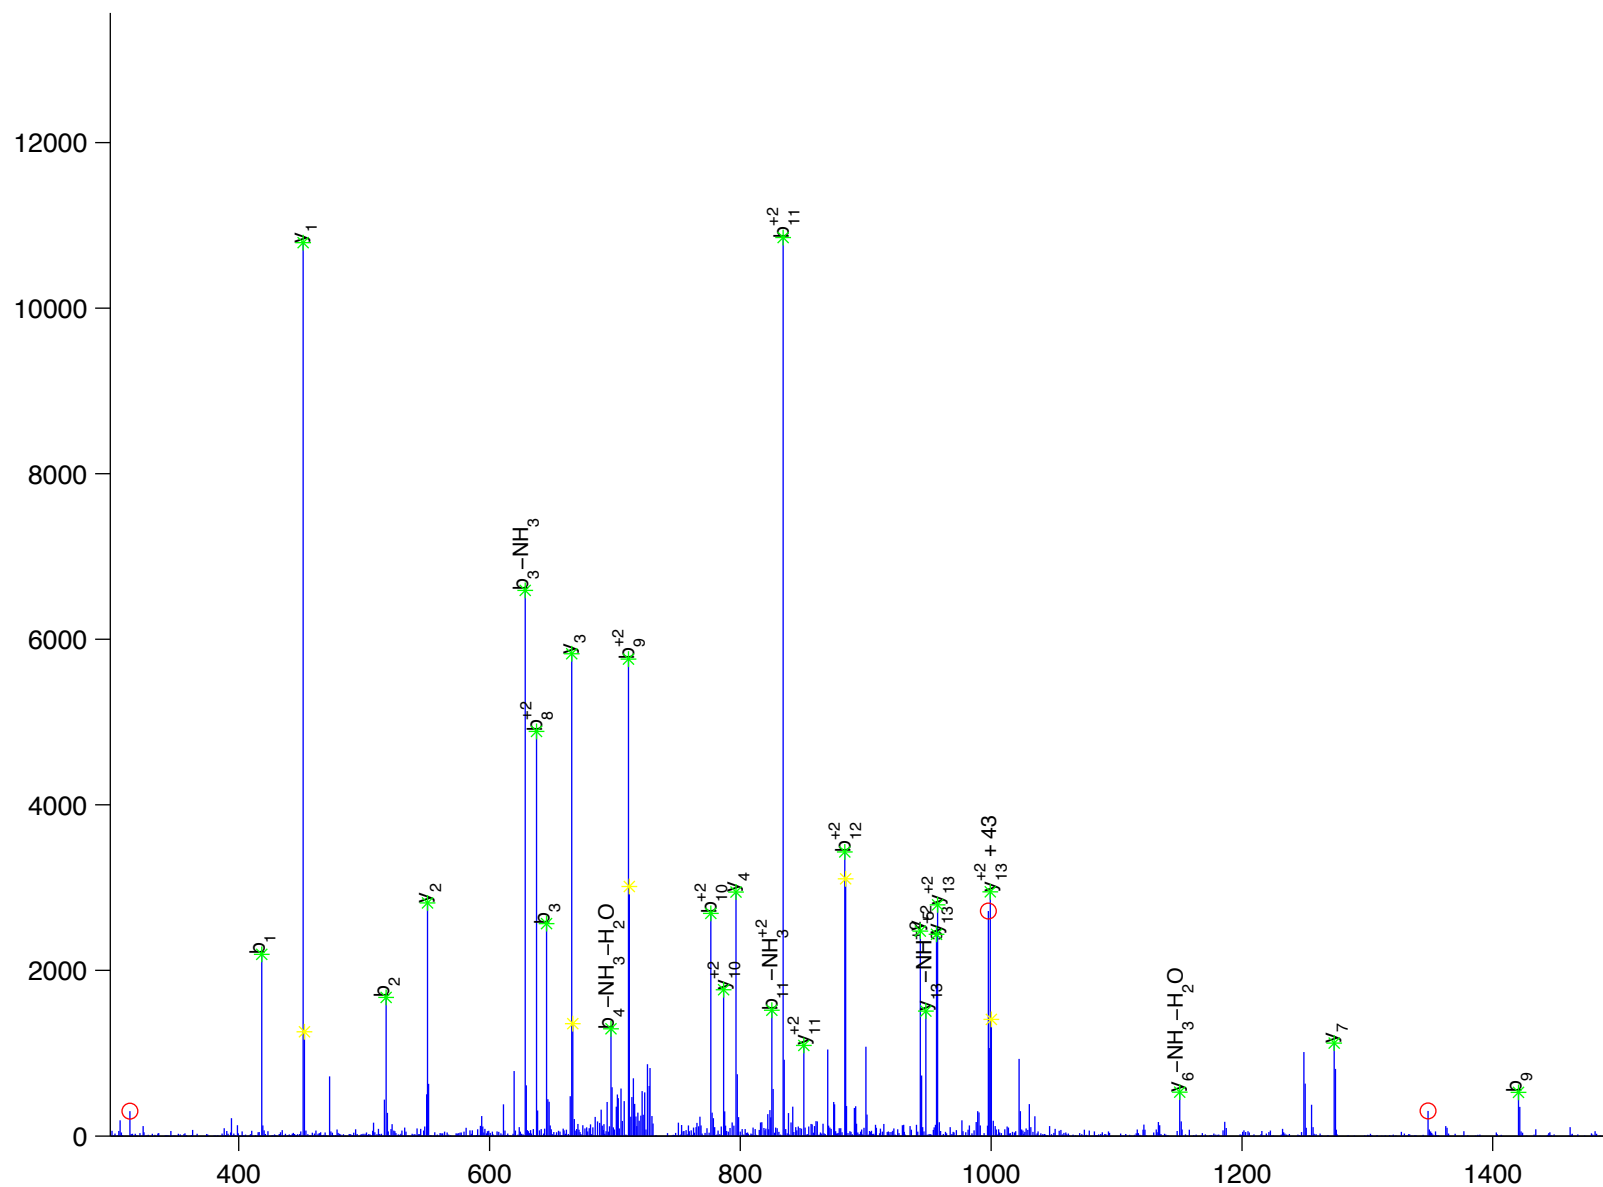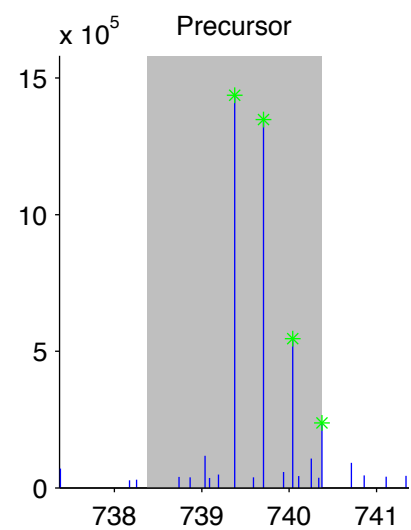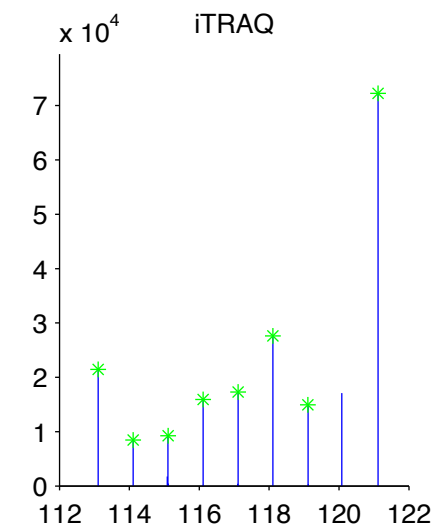

L [ c ] D [ F ] G [ S ] A [ S ] H [ V ] A [ D ] N [ D ] I [ T ] P [ y ] L [ V ] S [ R ]

serine/threonine-protein kinase PRP4K [Homo sapiens]

Charge State: +3

Scan Number: 6561

File Name: HJ050711\_GBMxeno\_bio1\_E\_HANNAH.raw

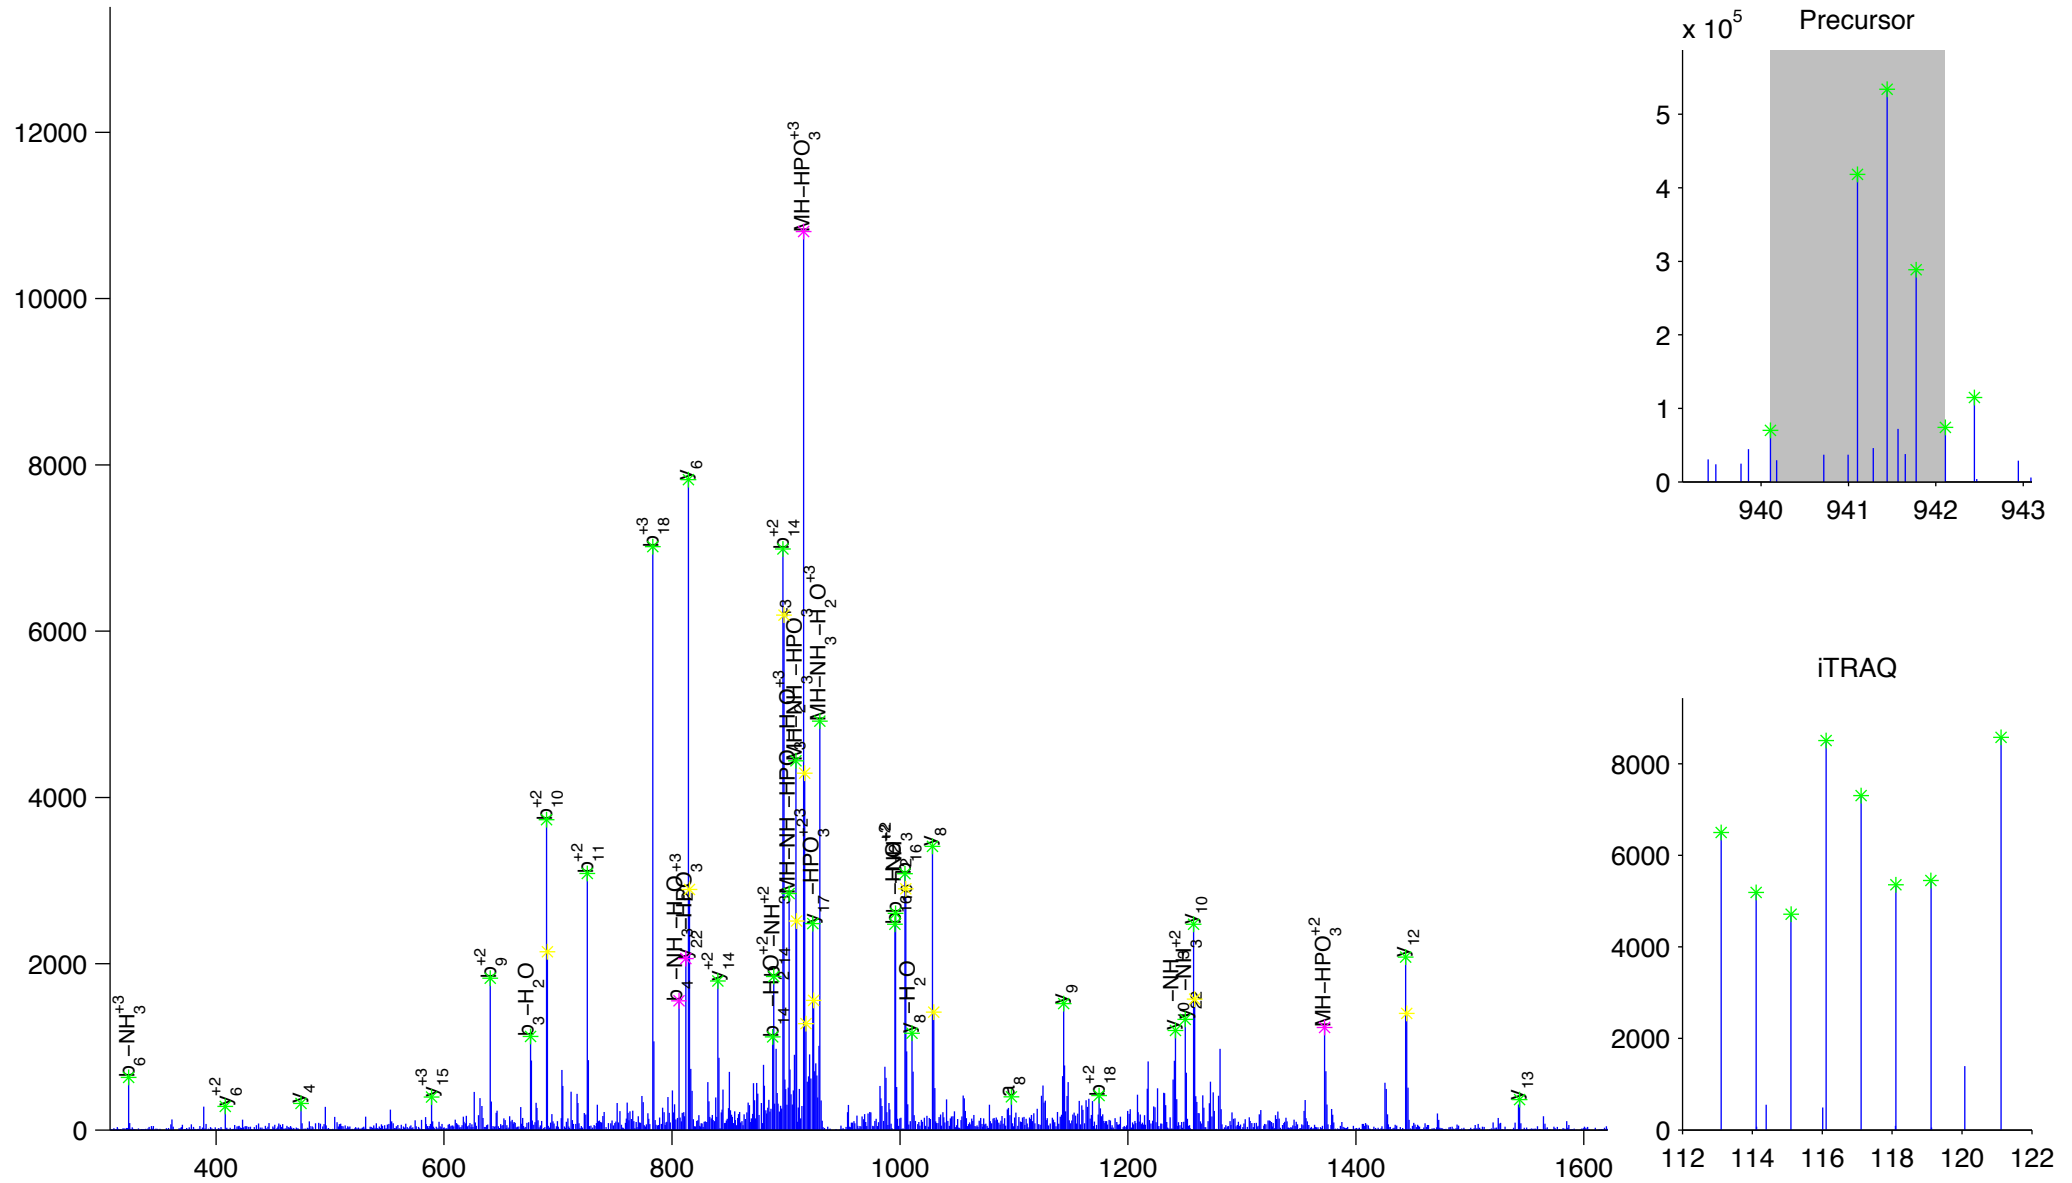

L [ c ] D [ F ] G [ S ] A [ S ] H [ V ] A [ D ] N [ D ] I [ T ] P [ y ] L [ V ] S [ R ]

serine/threonine-protein kinase PRP4K [Homo sapiens]

Charge State: +2

Scan Number: 8092

File Name: HJ050711\_GBMxeno\_bio1\_E\_HANNAH.raw

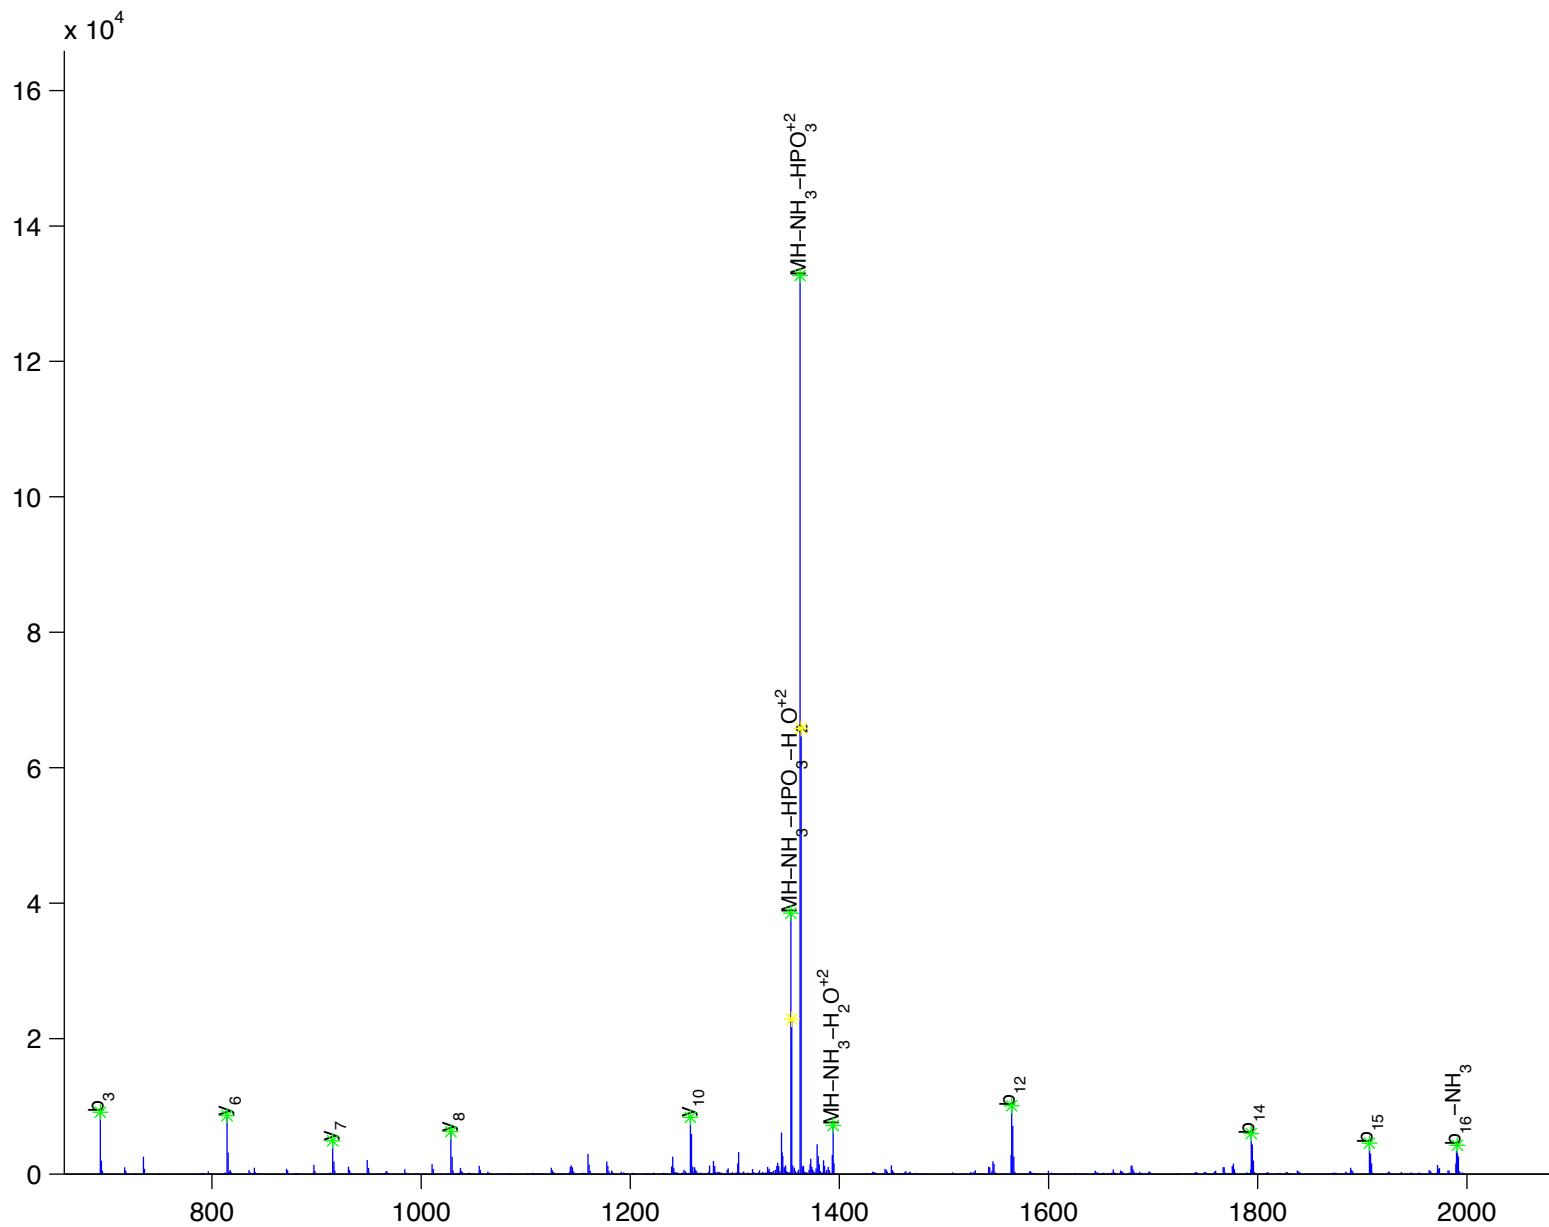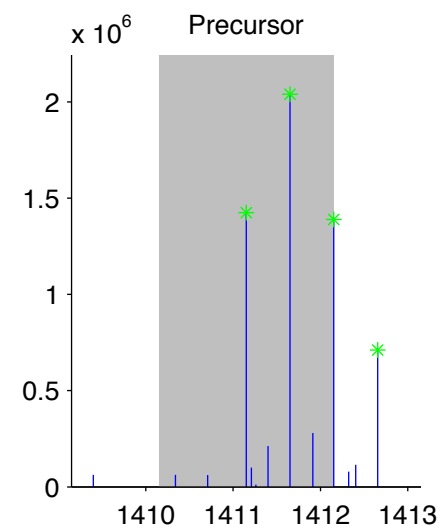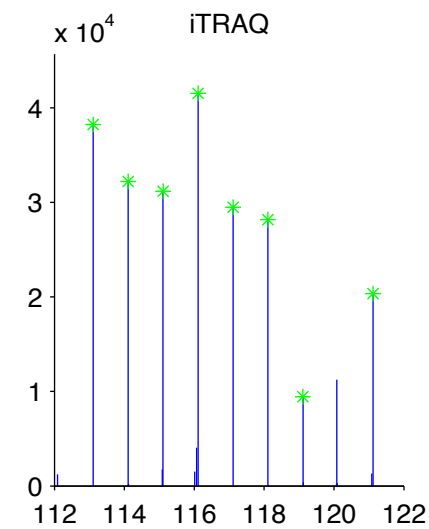

L [ c ] D [ F ] G [ S ] A [ S ] H [ V ] A [ D ] N [ D ] I [ T ] P [ y ] L [ V ] S [ R ]

serine/threonine-protein kinase PRP4K [Homo sapiens]

Charge State: +3

Scan Number: 8193

File Name: HJ050711\_GBMxeno\_bio1\_E\_HANNAH.raw

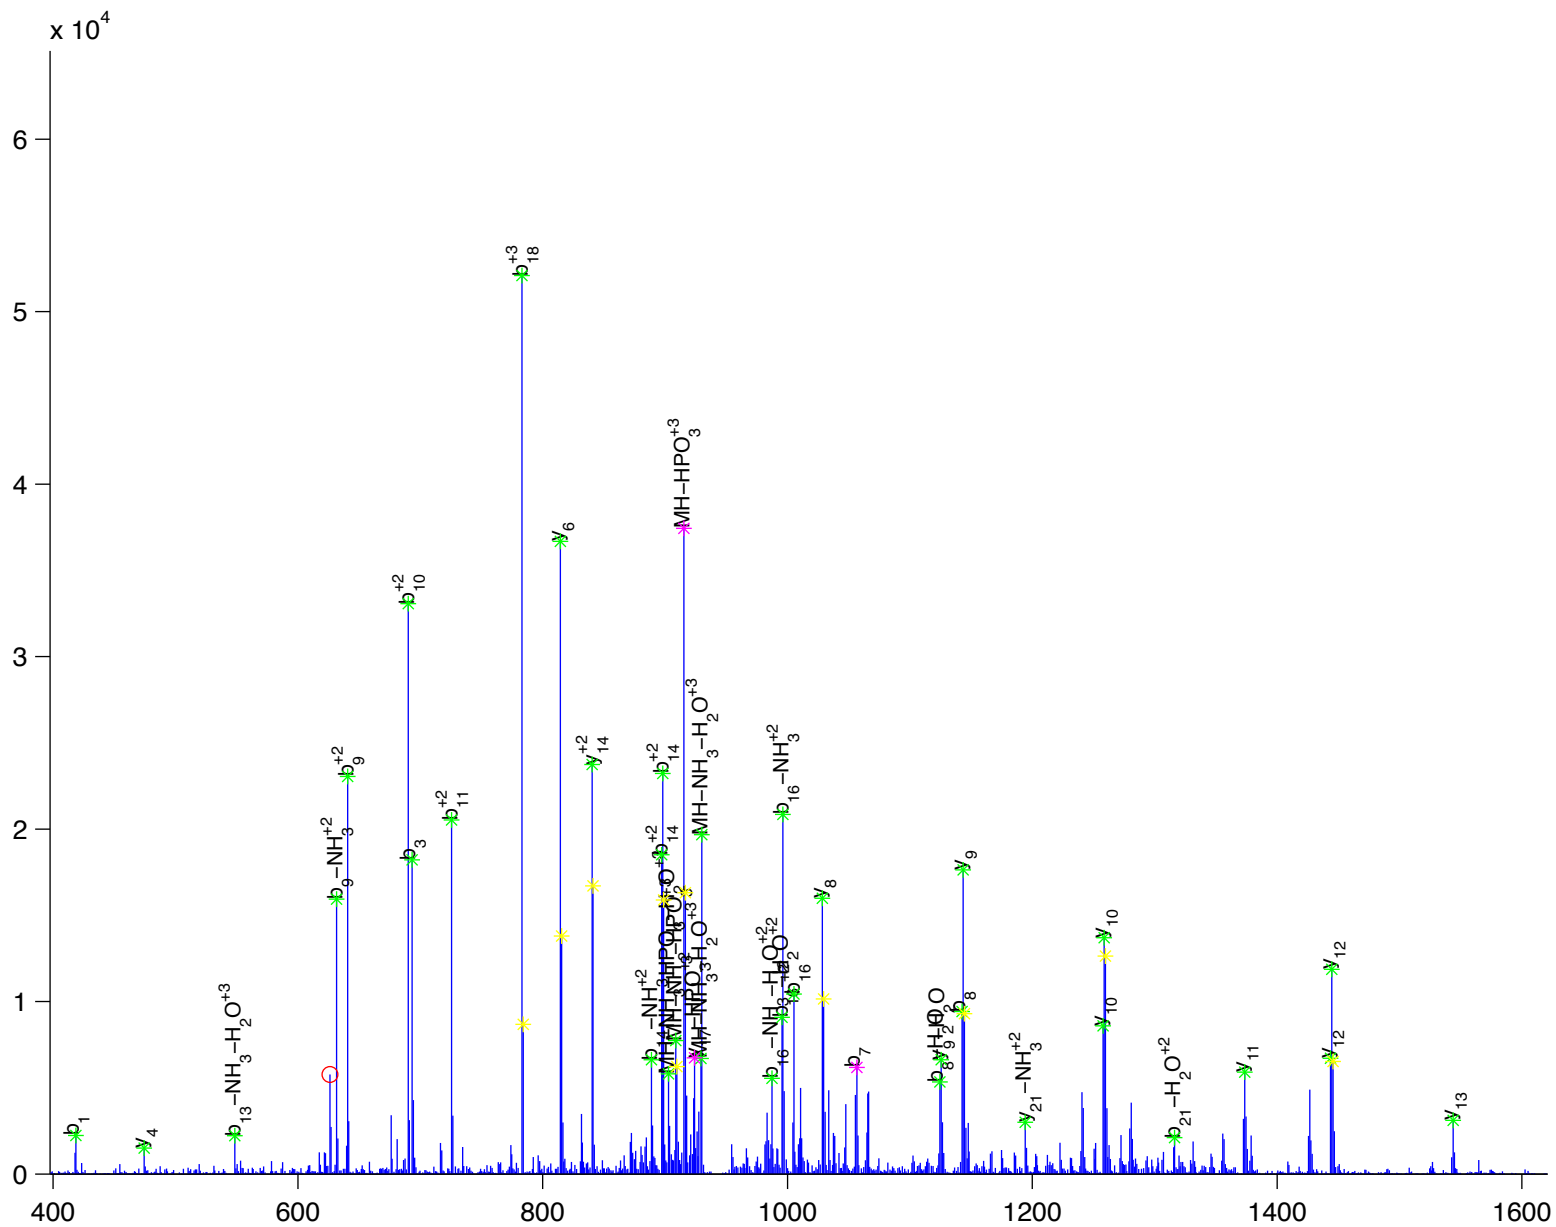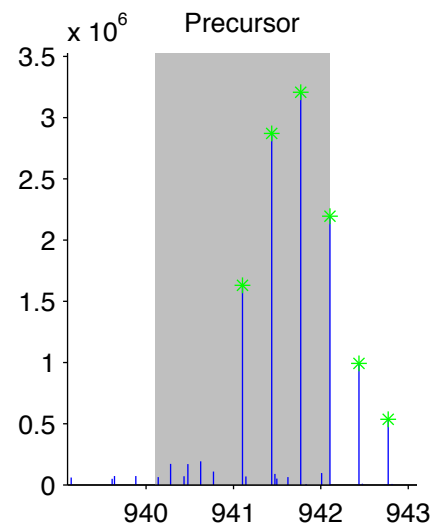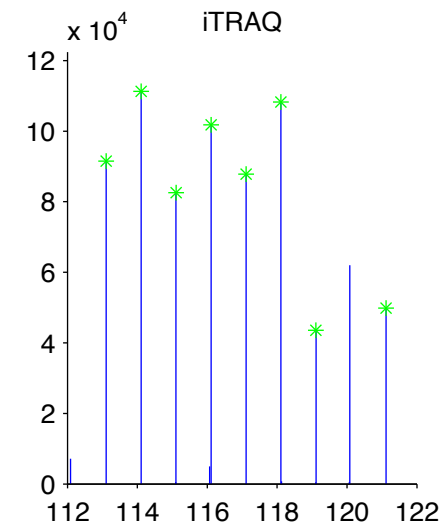

I [D] [F] [Y] [F] [D] [E] [N] [P] [y] [F] [E] [N] [K]

SET translocation (myeloid leukemia-associated) [Homo sapiens]

Charge State: +3

Scan Number: 9497

File Name: HJ050711\_GBMxeno\_bio1\_E\_HANNAH.raw

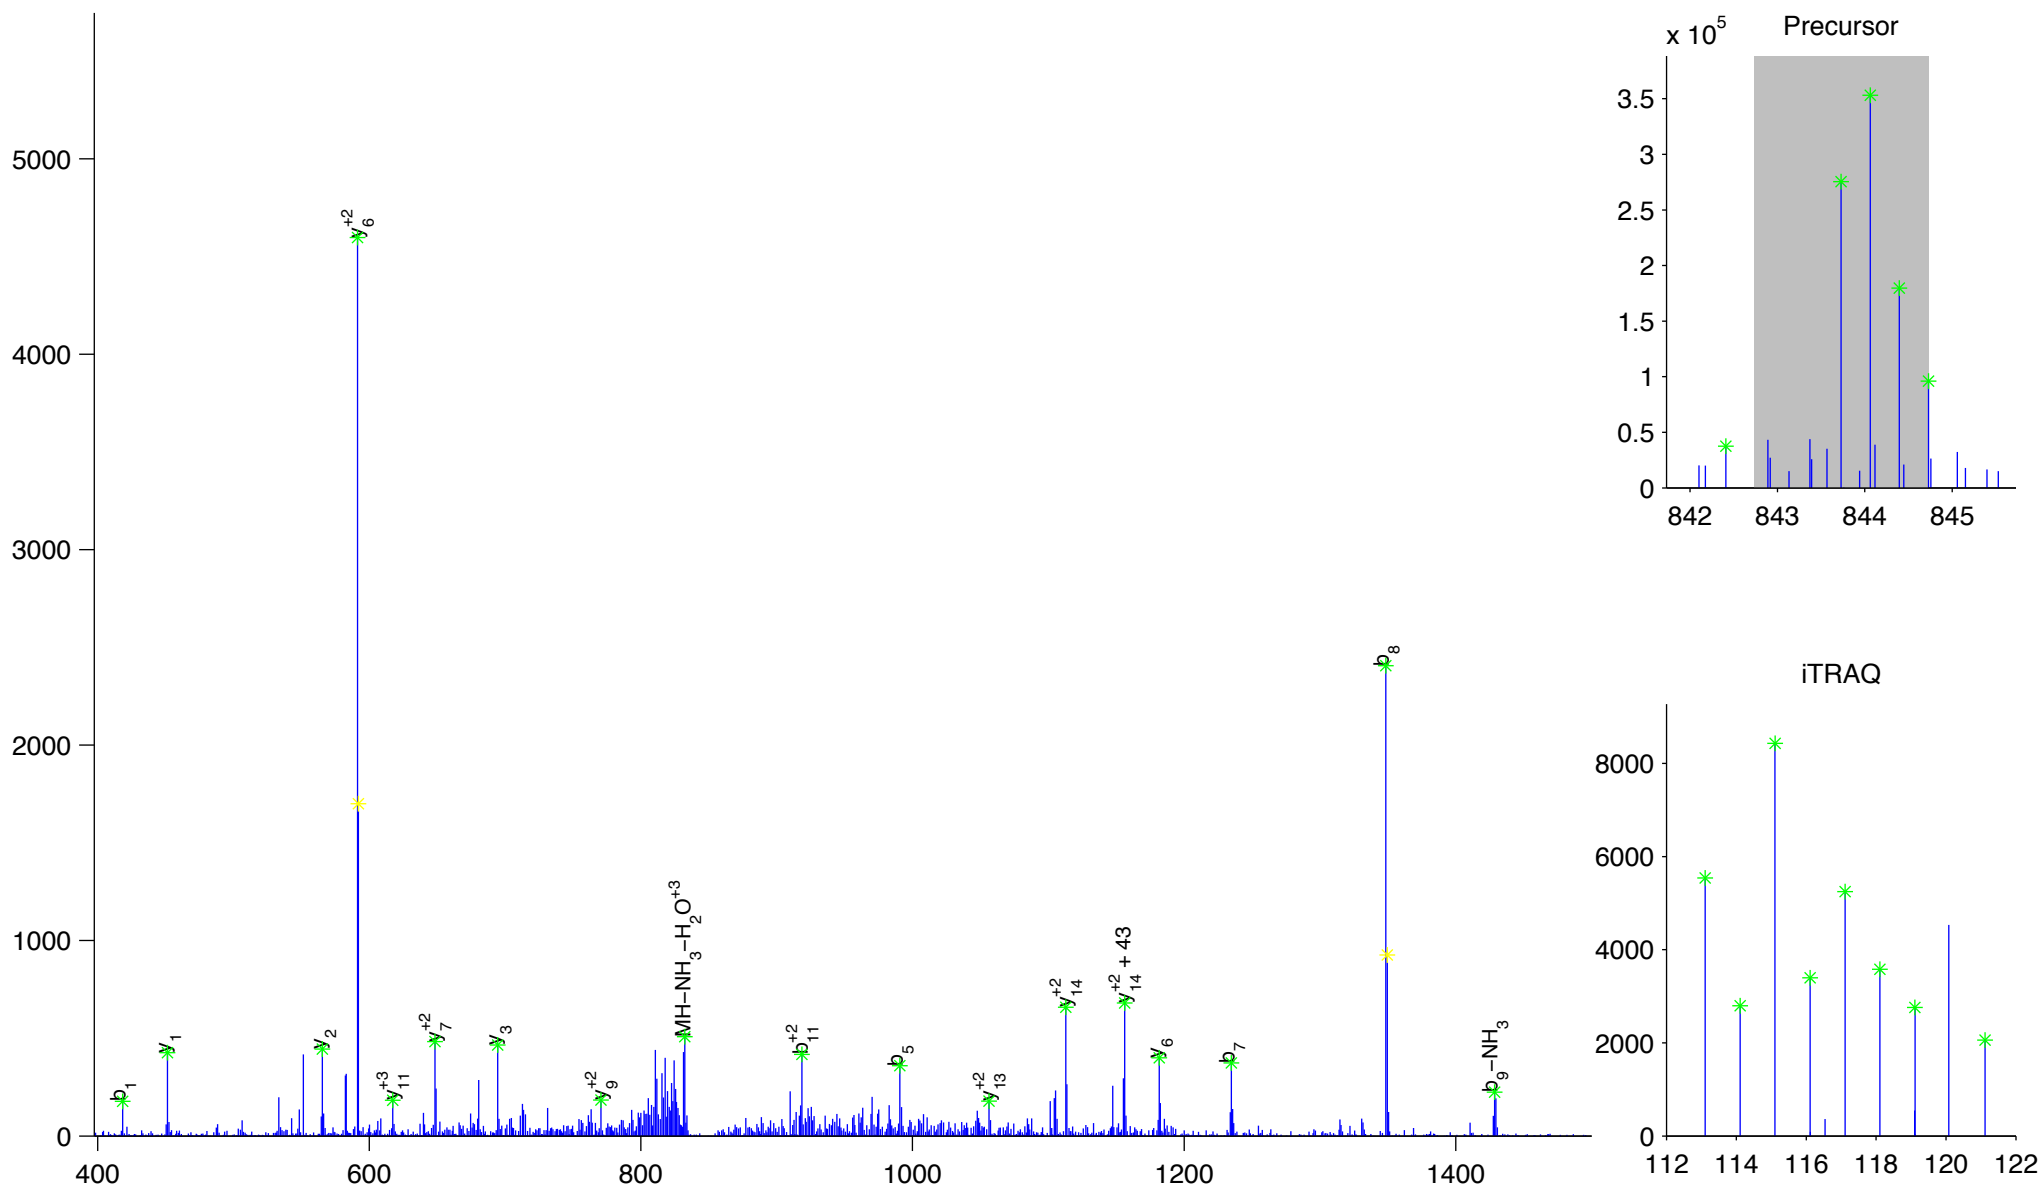

L [ y ] [ D ] [ F ] [ V ] K

SH2 containing inositol phosphatase isoform b [Homo sapiens]

Charge State: +3

Scan Number: 8518

File Name: HJ050711\_GBMxeno\_bio1\_E\_HANNAH.raw

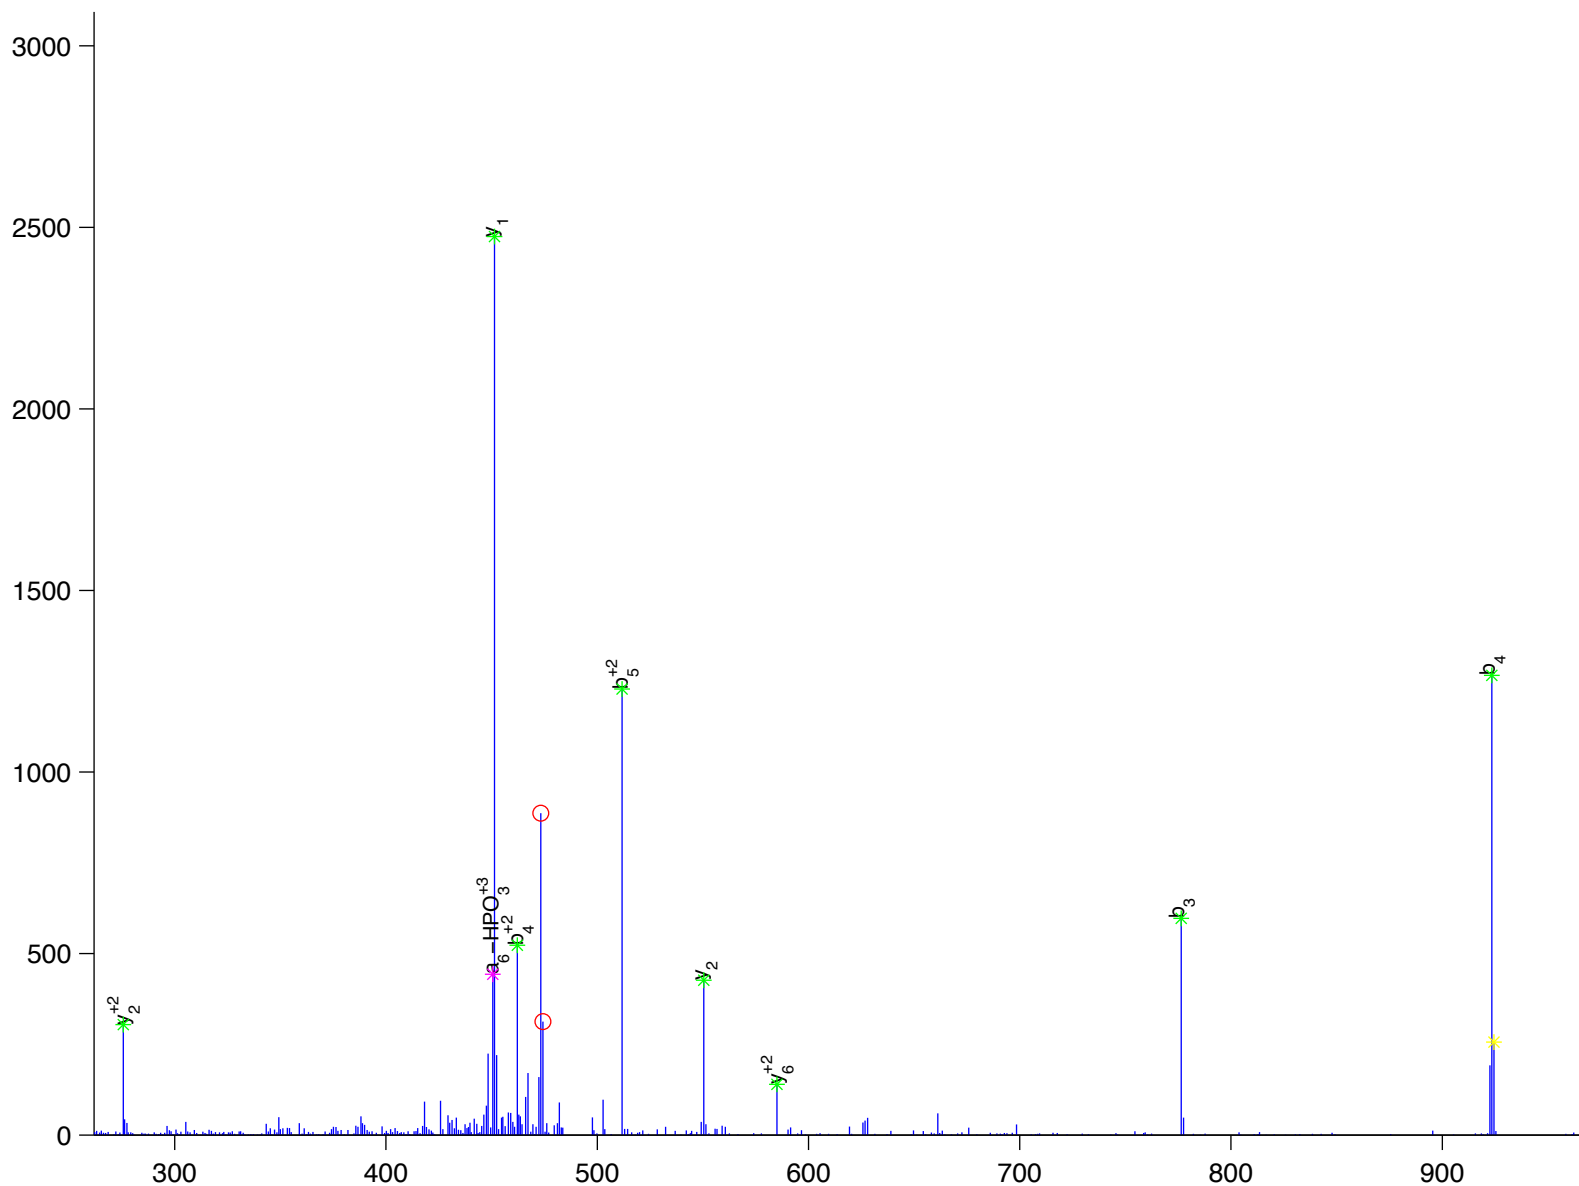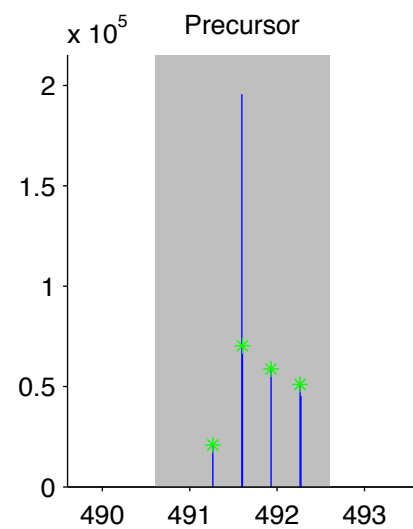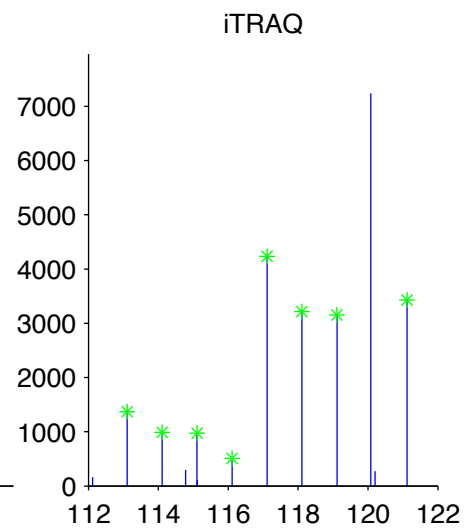

E L F D D P S y V N V Q N L D K

SHC (Src homology 2 domain containing) transforming protein 1 isoform p52Shc [Homo sapiens]

Charge State: +2

Scan Number: 8247

File Name: HJ050711\_GBMxeno\_bio1\_E\_HANNAH.raw

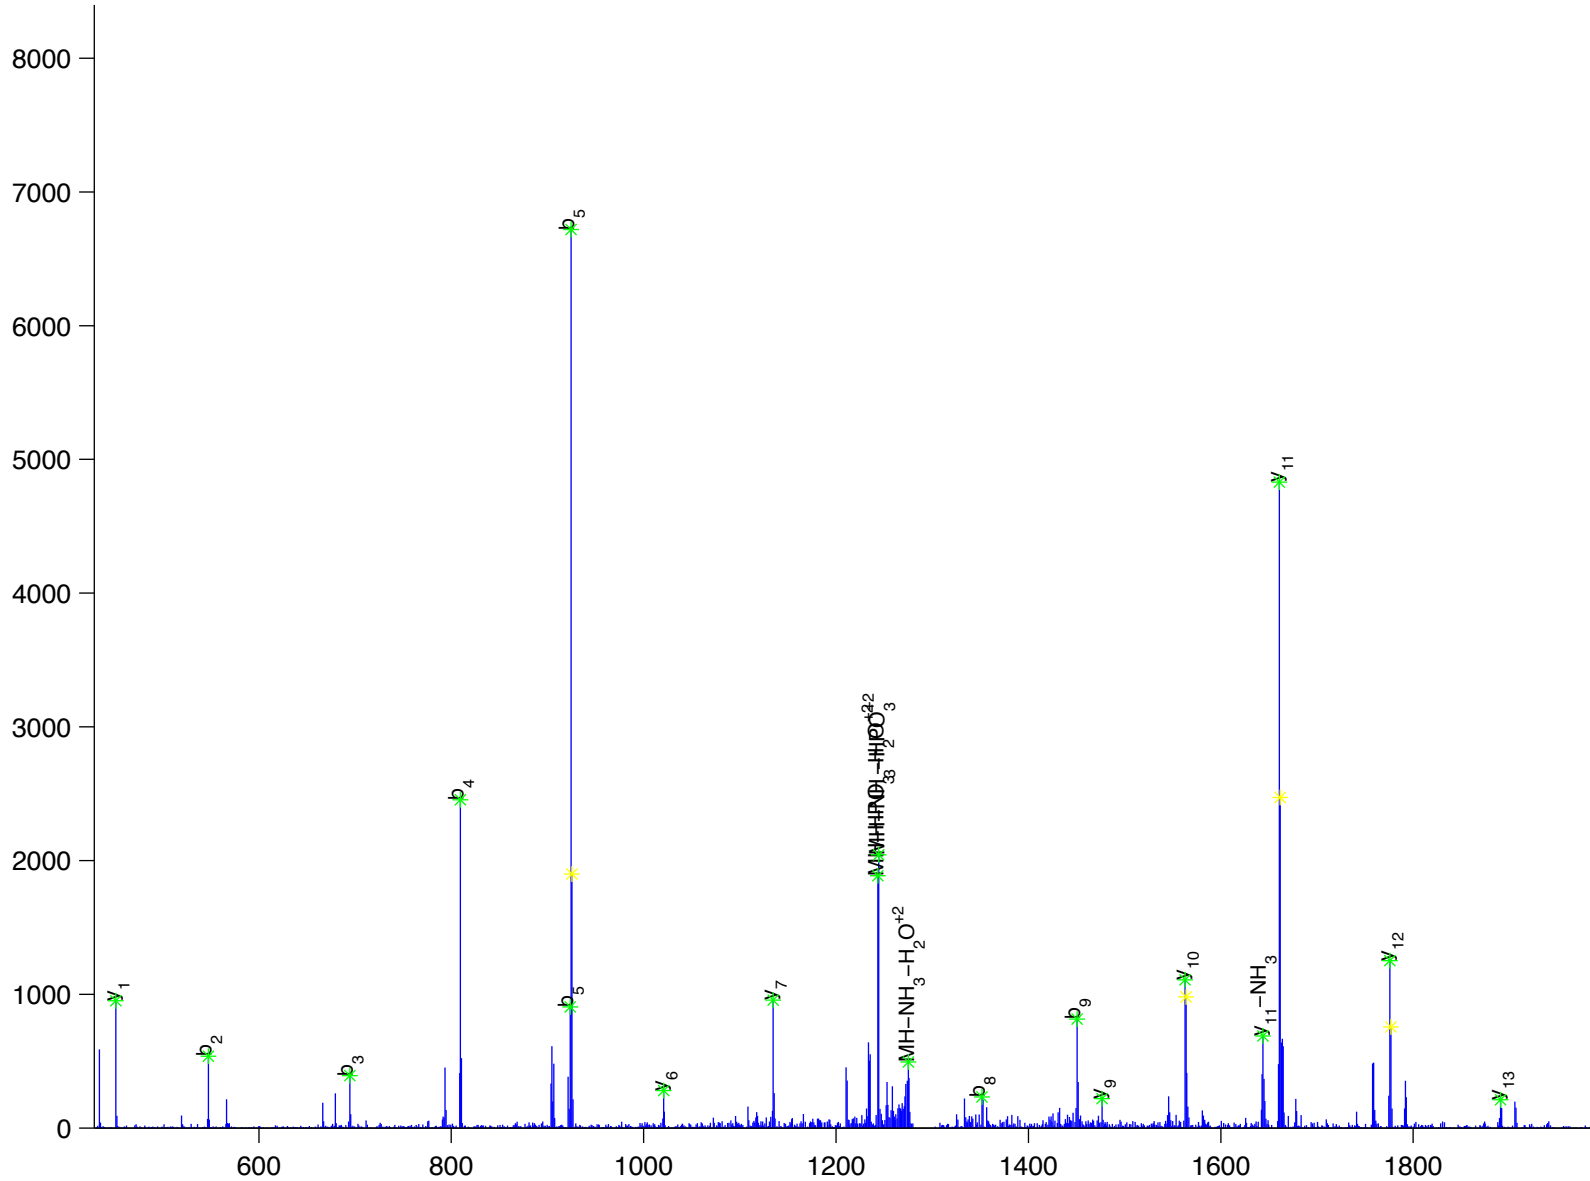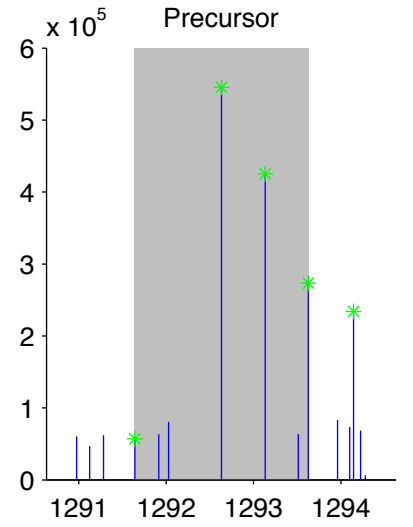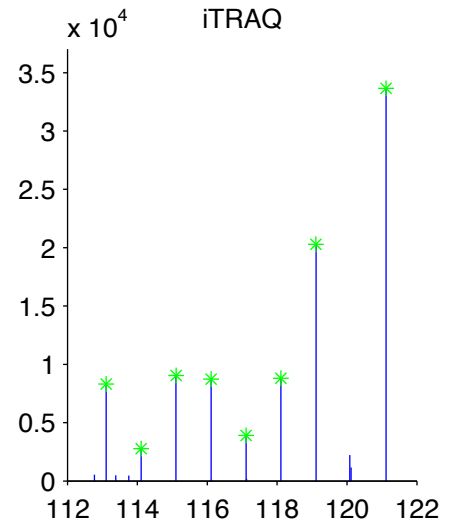

Y [ c ] R [ P ] E [ S ] Q [ E ] H [ P ] E [ A ] D [ P ] G [ S ] A [ A ] P [ y ] L [ K ]

signal transducer and activator of transcription 3 isoform 1 [Homo sapiens]

Charge State: +3

Scan Number: 4797

File Name: HJ050711\_GBMxeno\_bio1\_E\_HANNAH.raw

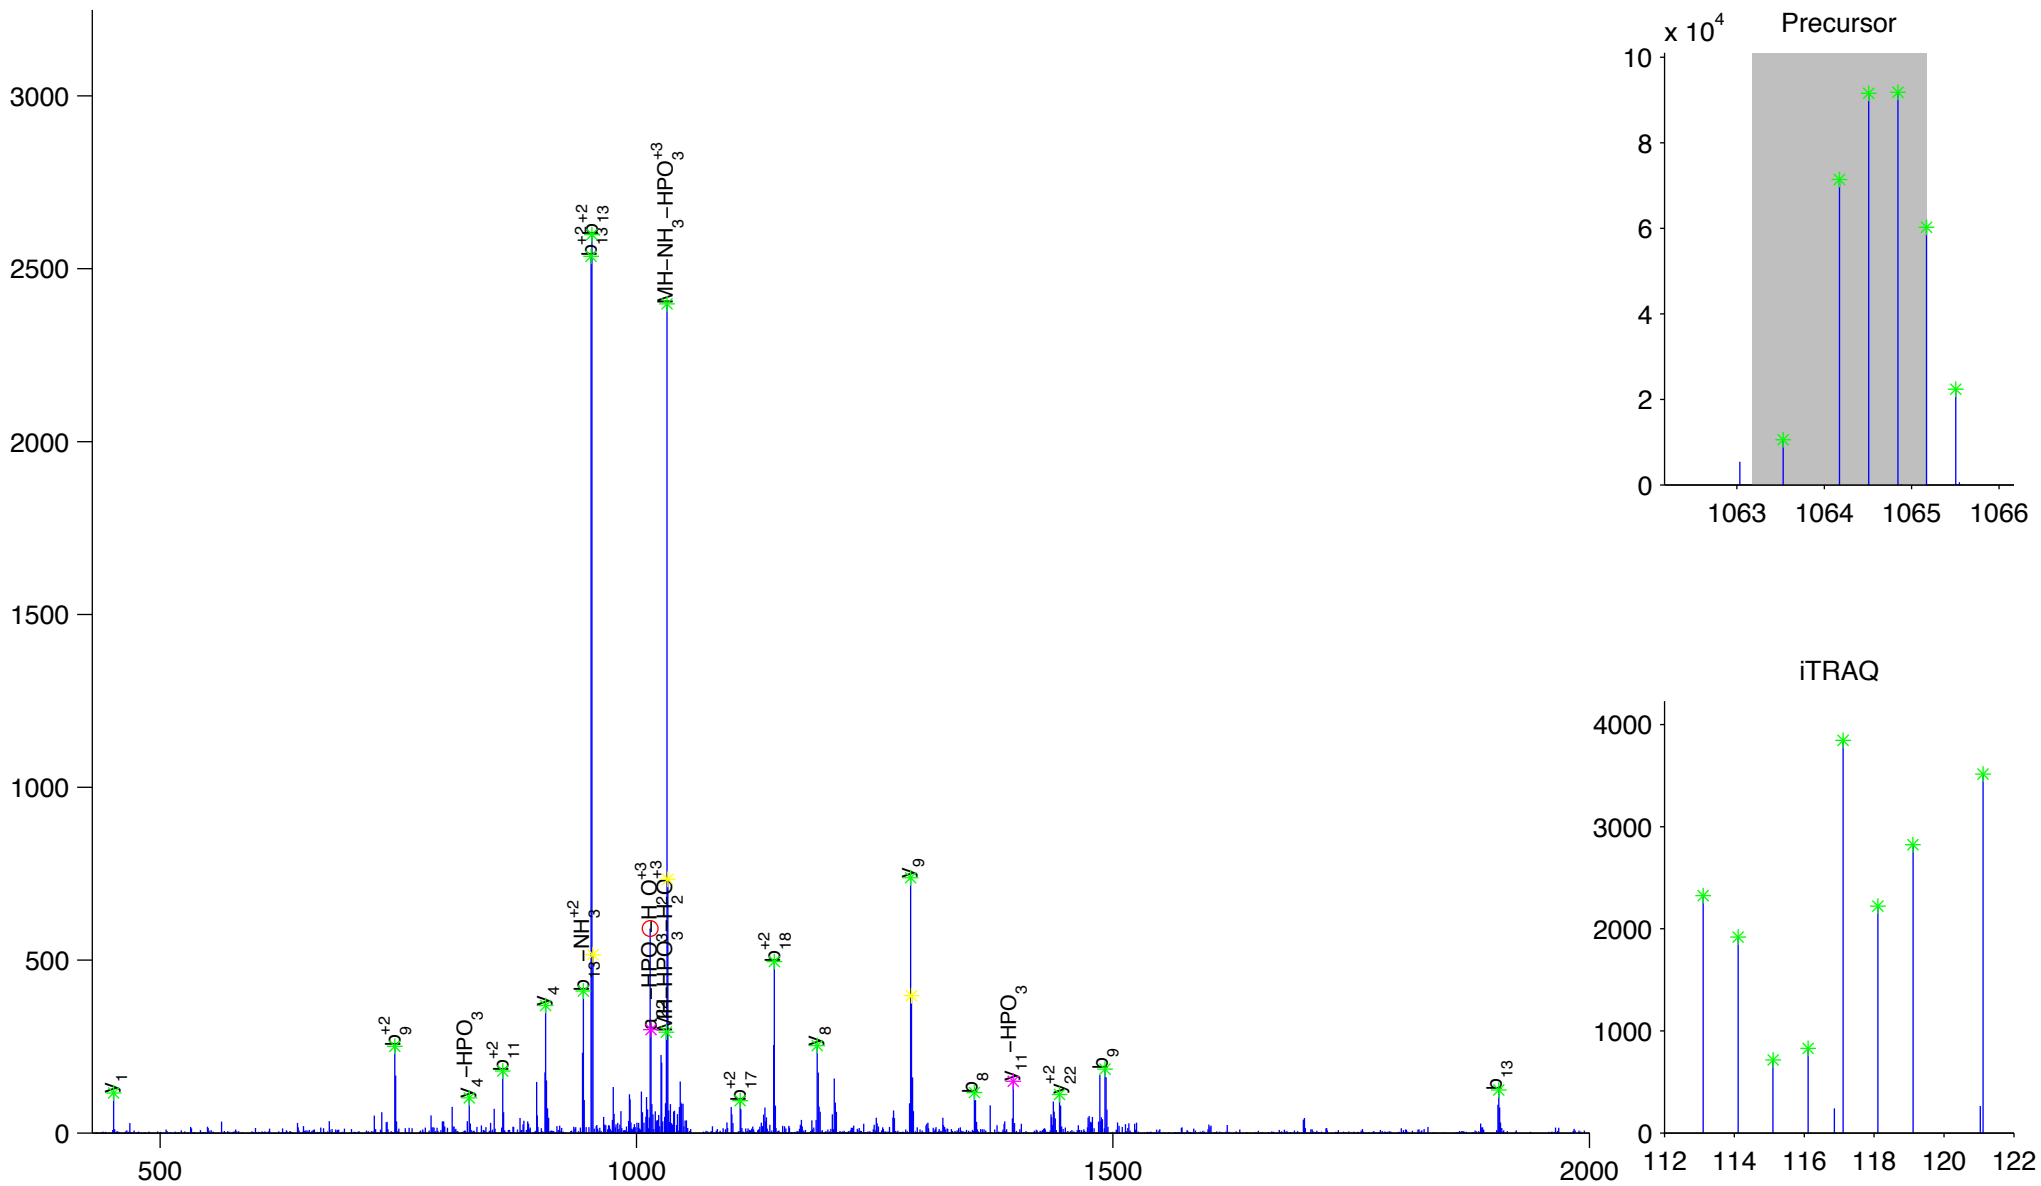



Y  $\left[ \begin{array}{c} c \\ R \\ P \\ E \\ S \\ Q \\ E \\ H \\ P \\ E \\ A \\ D \\ P \\ G \\ S \\ A \\ A \\ P \\ y \\ L \\ K \end{array} \right]$

signal transducer and activator of transcription 3 isoform 1 [Homo sapiens]

Charge State: +3

Scan Number: 4969

File Name: HJ050711\_GBMxeno\_bio1\_E\_HANNAH.raw

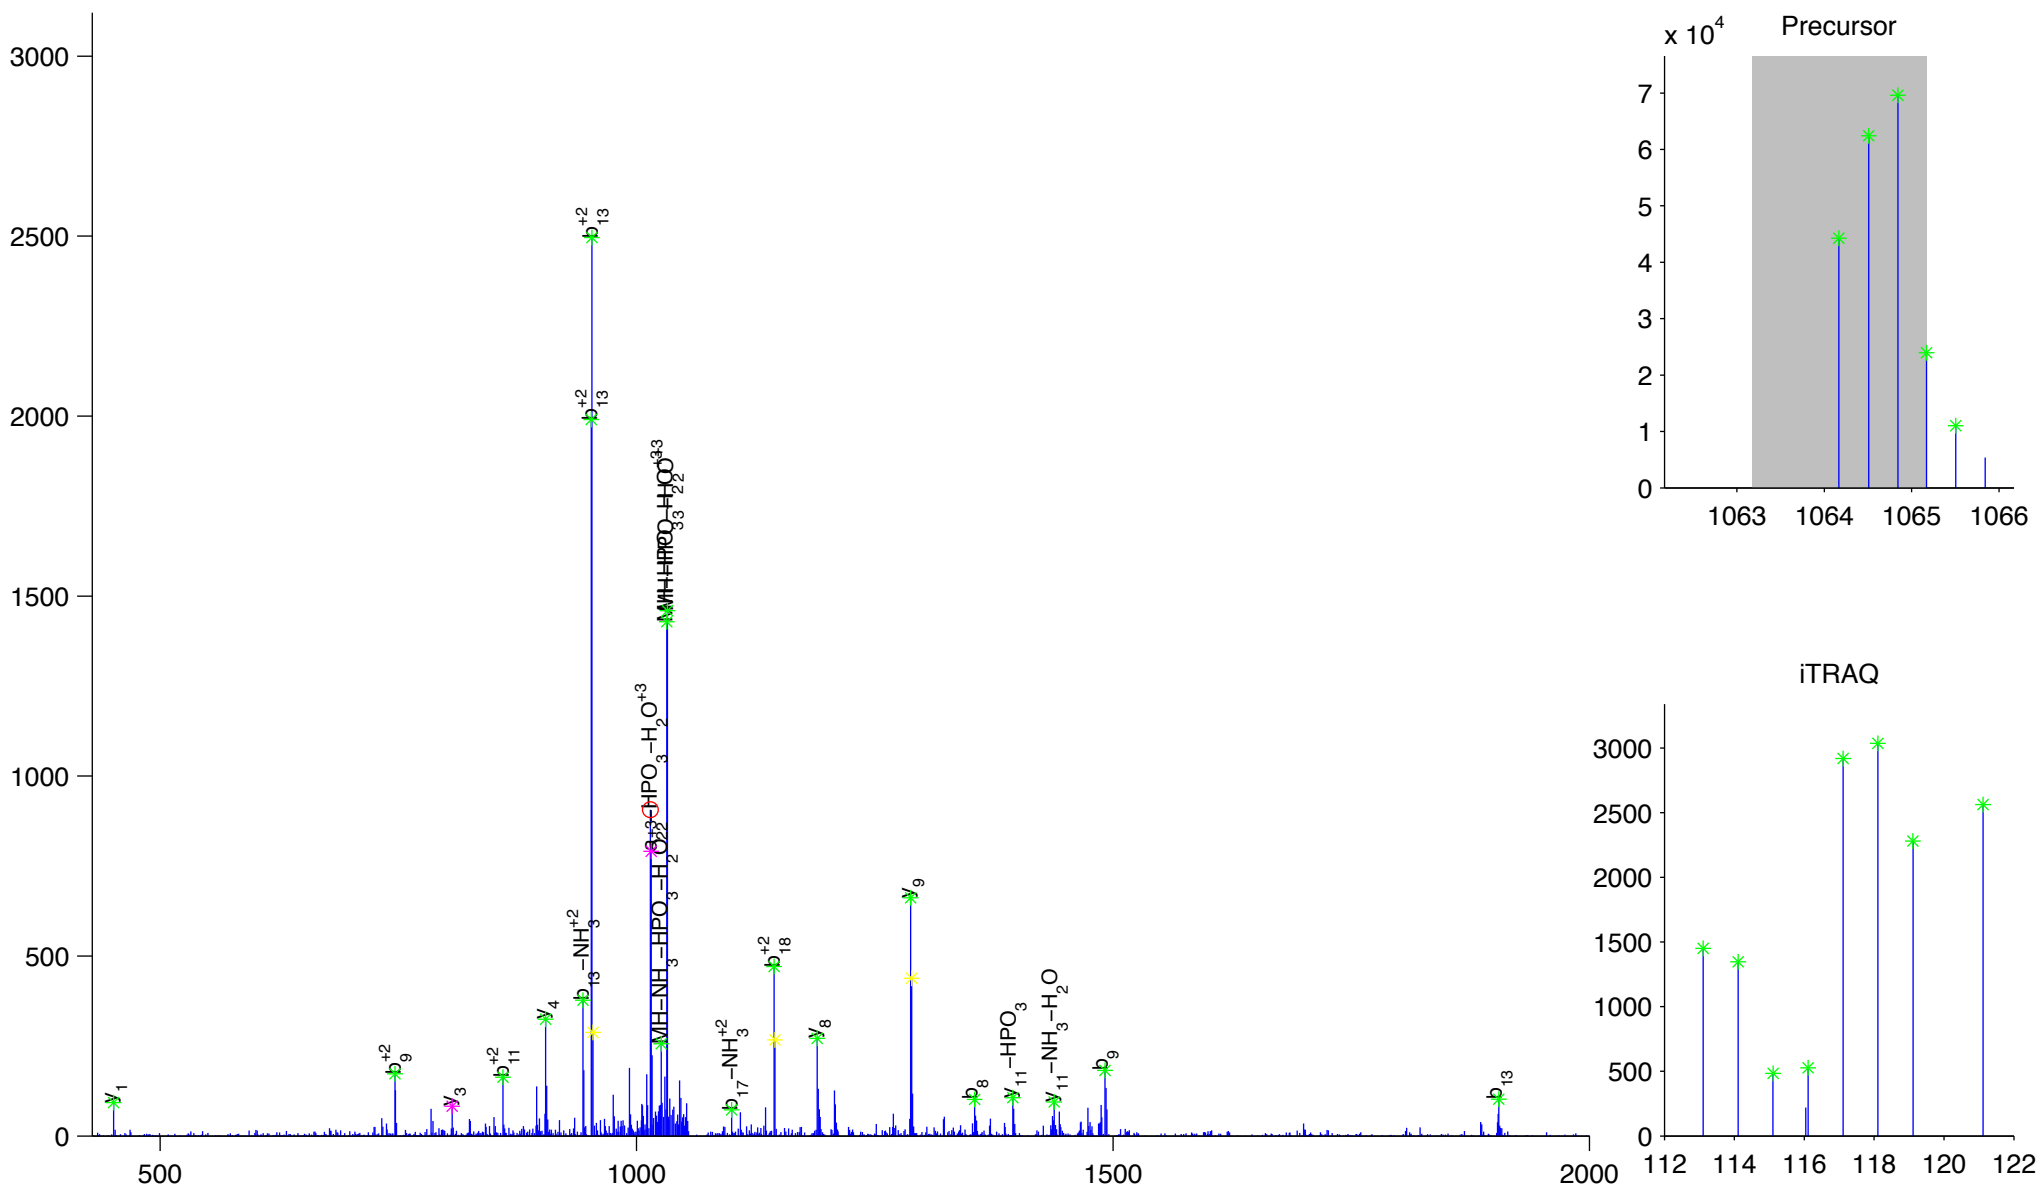

E [ P ] E [ L ] L [ y ] Q [ N ] I [ A ] E [ R ]

SLIT and NTRK-like family, member 2 [Homo sapiens]

Charge State: +2

Scan Number: 7611

File Name: HJ050711\_GBMxeno\_bio1\_E\_HANNAH.raw

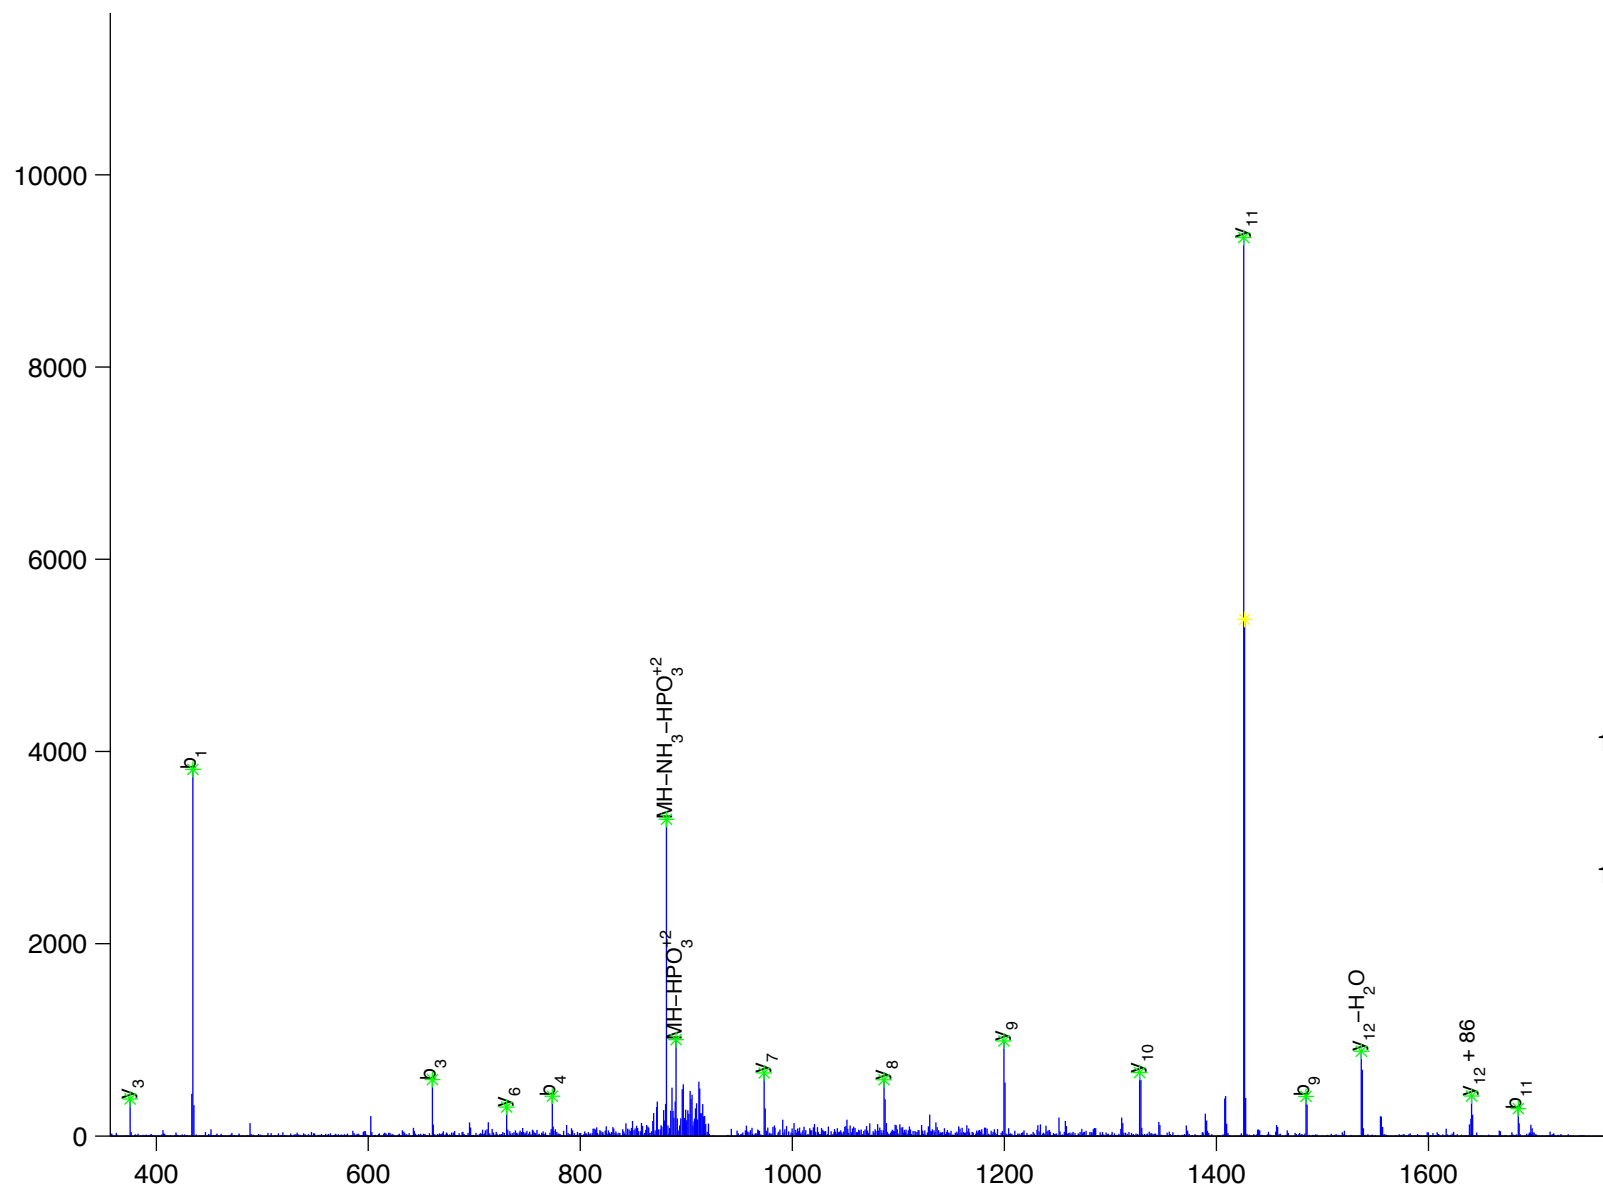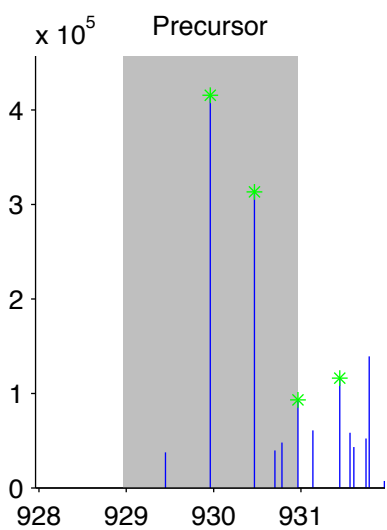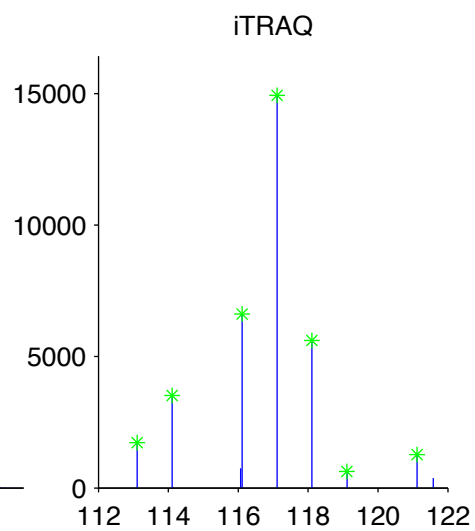

L [ N ] V [ E ] P [ D ] y [ L ] E [ V ] L [ E ] K

SLIT and NTRK-like family, member 5 [Homo sapiens]  
 Charge State: +3  
 Scan Number: 8848  
 File Name: HJ050711\_GBMxeno\_bio1\_E\_HANNAH.raw

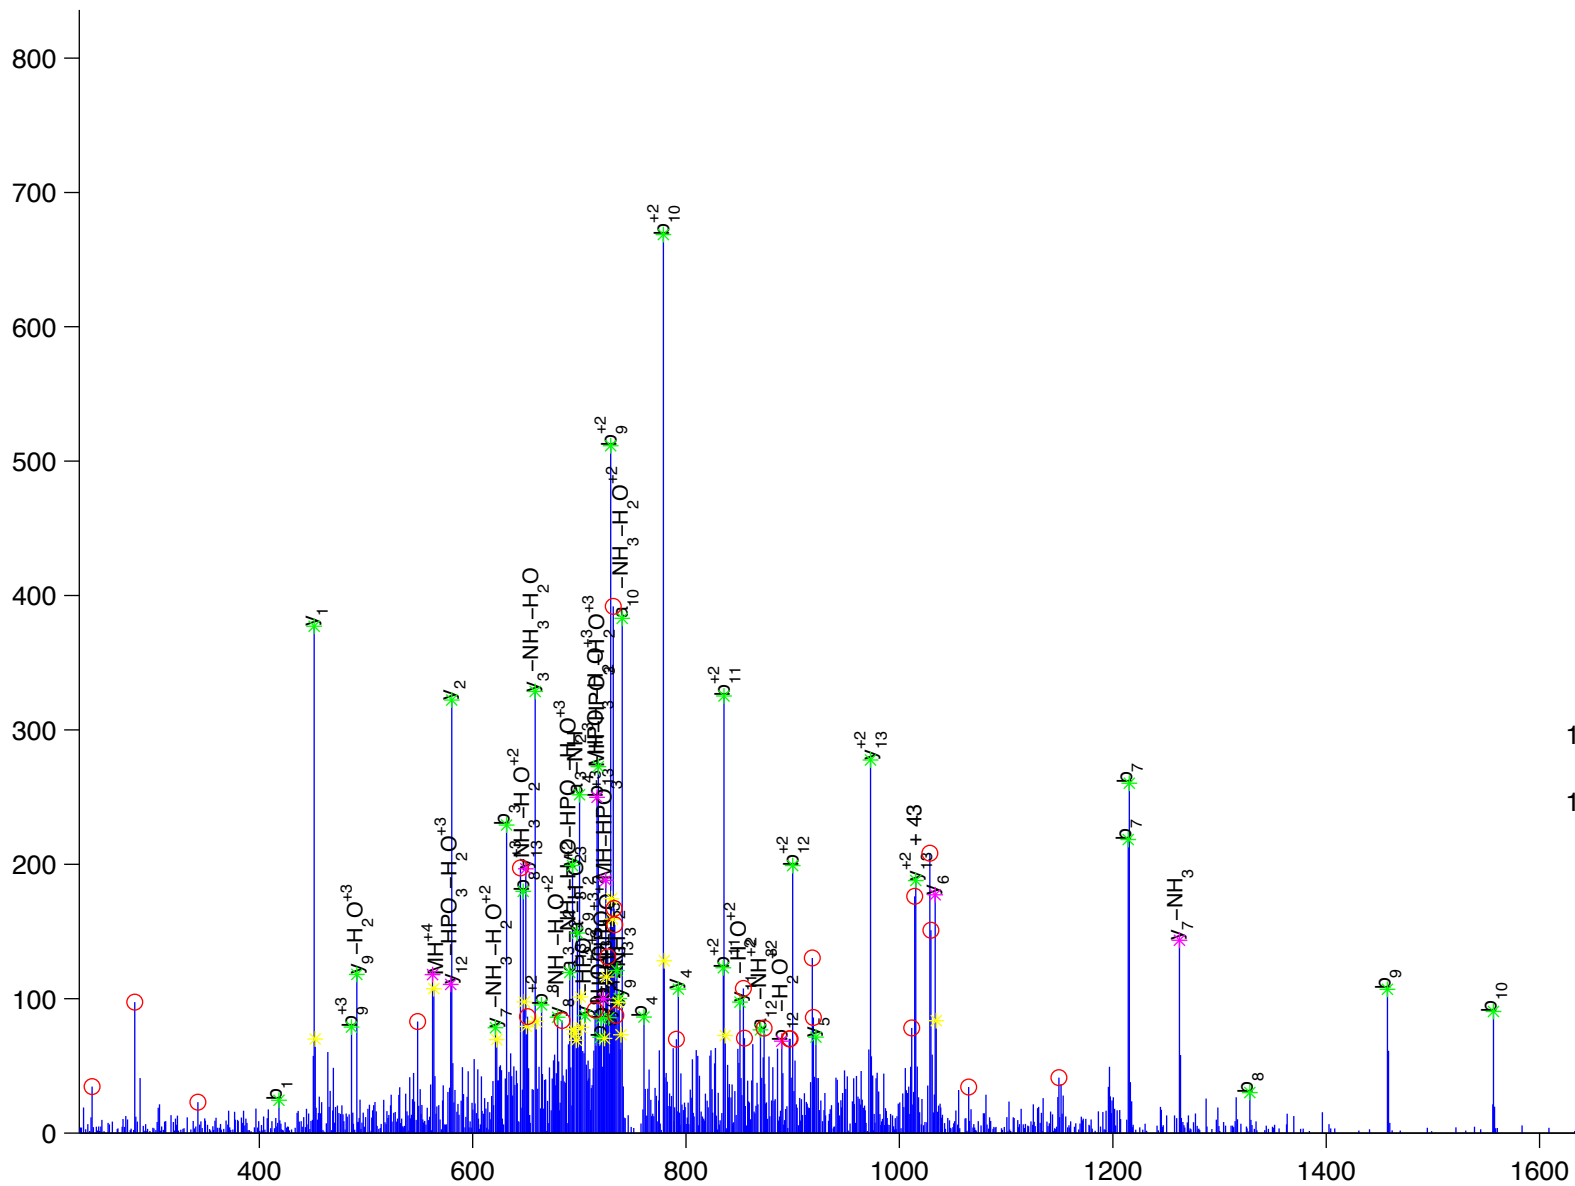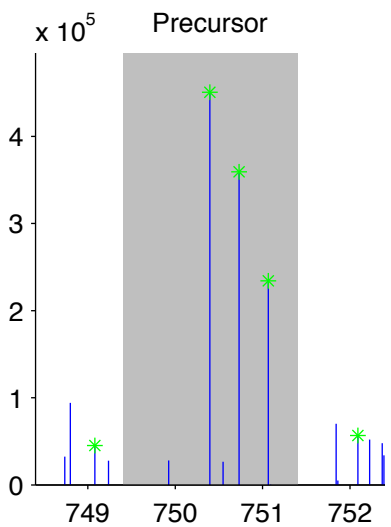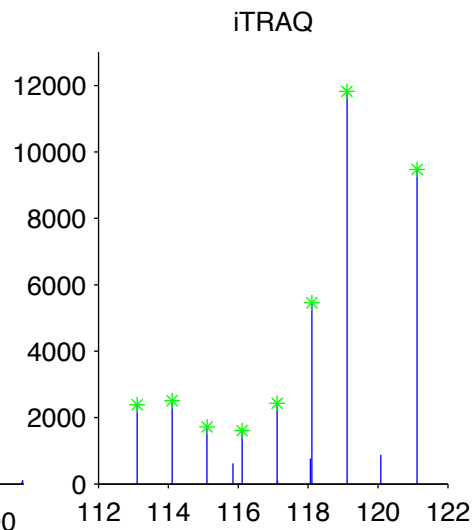

S [ H ] y [ A ] D [ V ] D [ P ] E [ N ] Q [ N ] F [ L ] L [ E ] S [ N ] L [ G ] K

solute carrier family 38, member 2 [Homo sapiens]

Charge State: +4

Scan Number: 7523

File Name: HJ050711\_GBMxeno\_bio1\_E\_HANNAH.raw

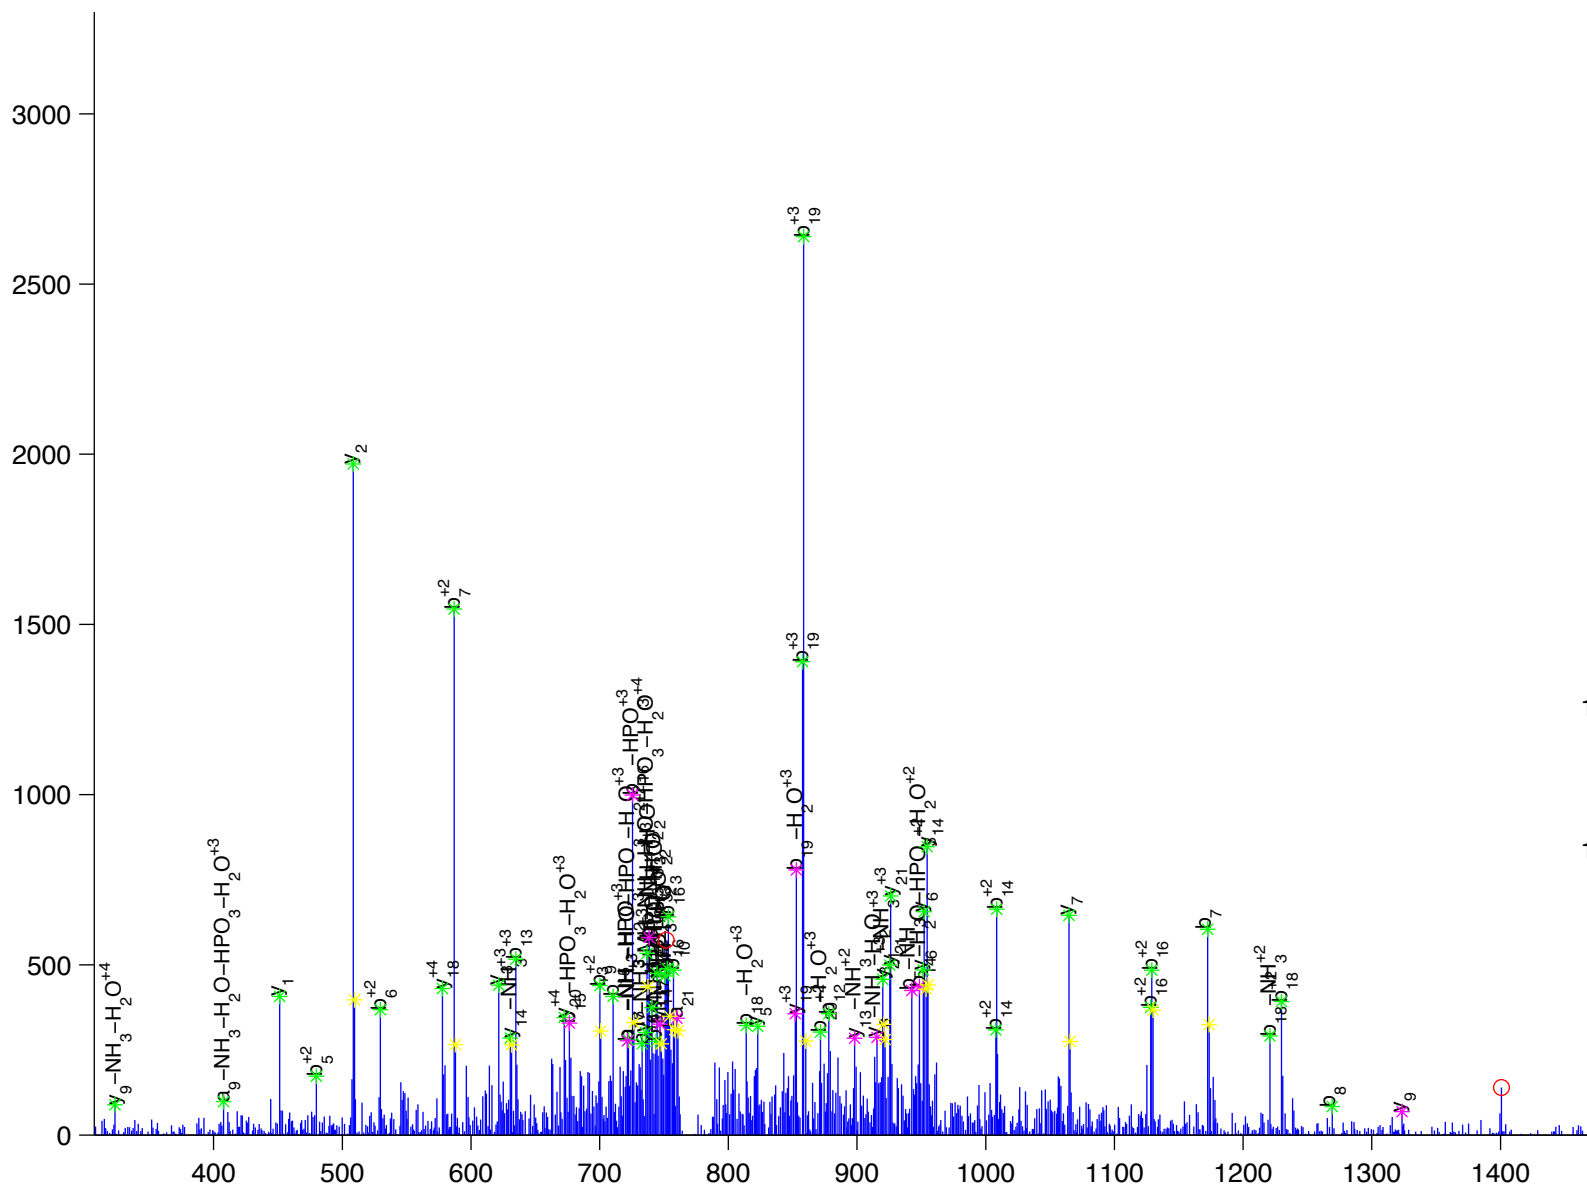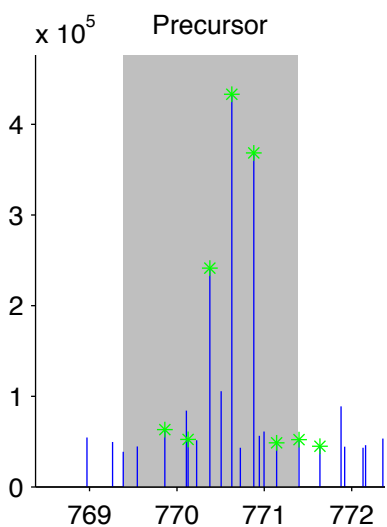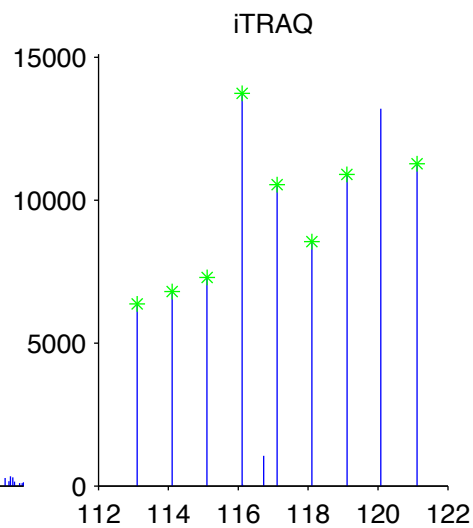

L [ y ] [ E ] [ Q ] R

sorting nexin family member 27 [Homo sapiens]

Charge State: +2

Scan Number: 3071

File Name: HJ050711\_GBMxeno\_bio1\_E\_HANNAH.raw

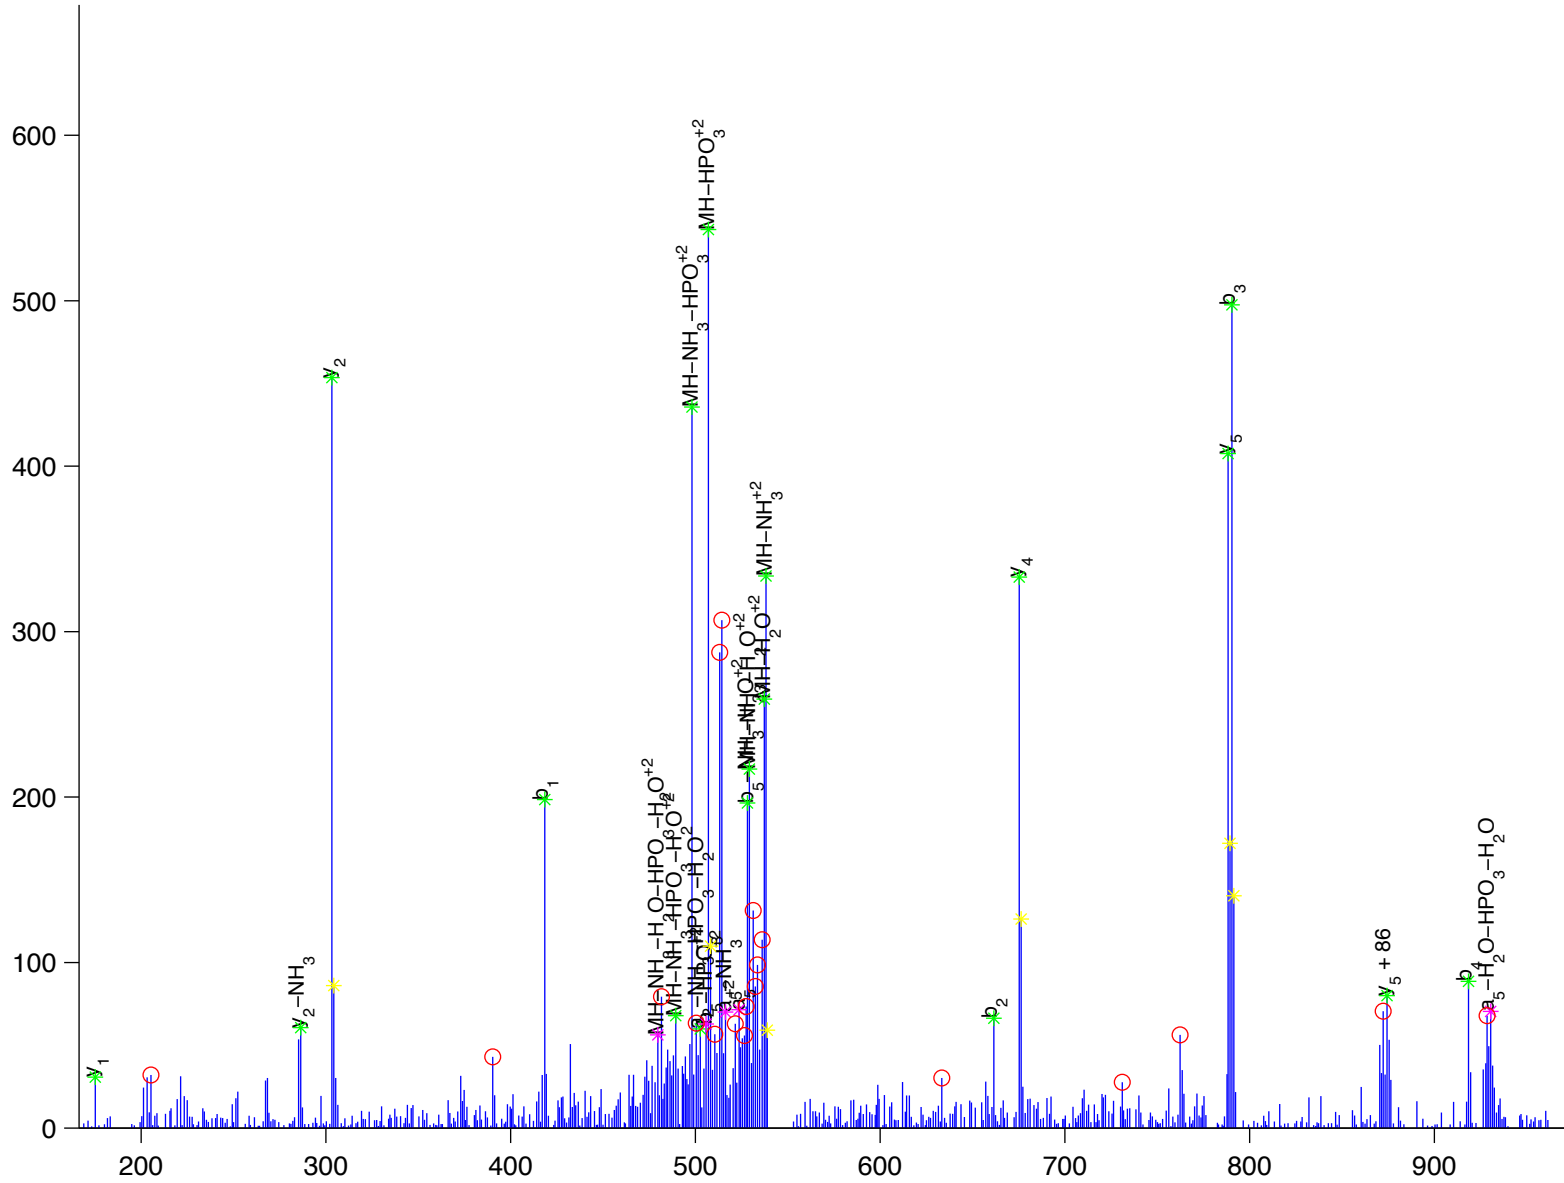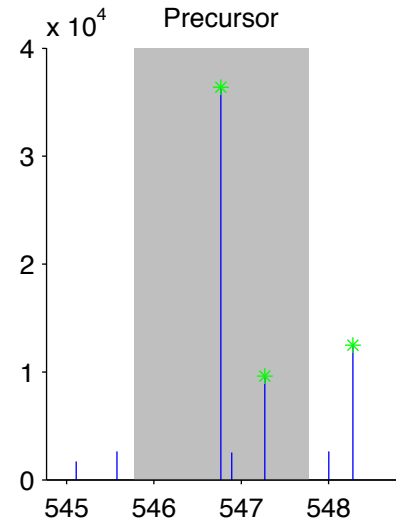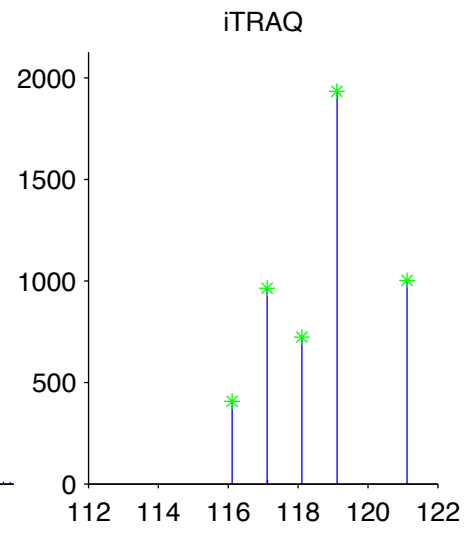

S [ H ] [ E ] [ G ] [ E ] [ T ] [ A ] y [ I ] R

splicing factor, arginine/serine-rich 1 isoform 1 [Homo sapiens]

Charge State: +3

Scan Number: 2523

File Name: HJ050711\_GBMxeno\_bio1\_E\_HANNAH.raw

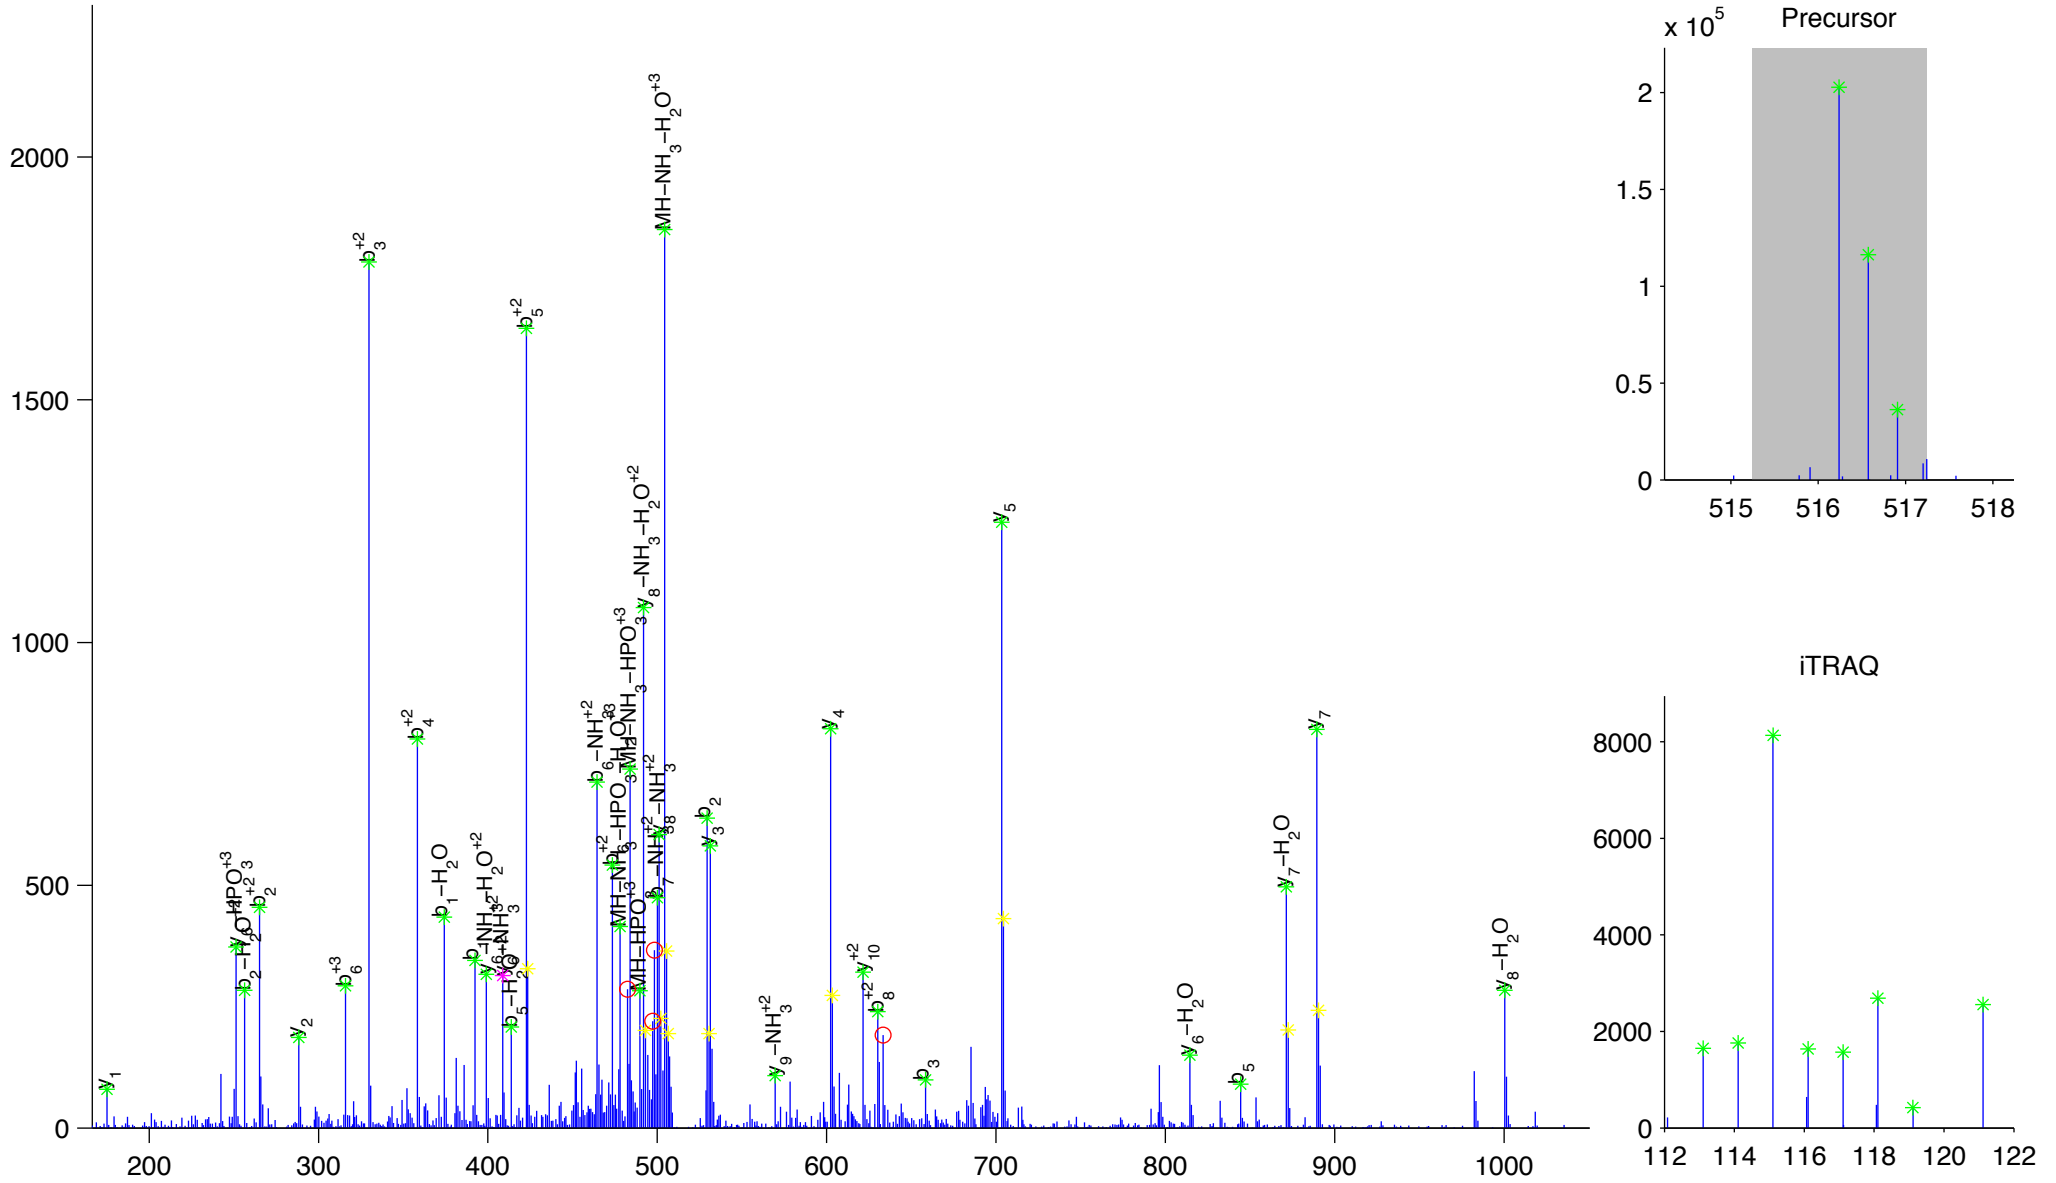

G[S]N[E]y[T]E[G]P[S]V[V]K

sprouty homolog 1, antagonist of FGF signaling [Homo sapiens]

Charge State: +3

Scan Number: 4518

File Name: HJ050711\_GBMxeno\_bio1\_E\_HANNAH.raw

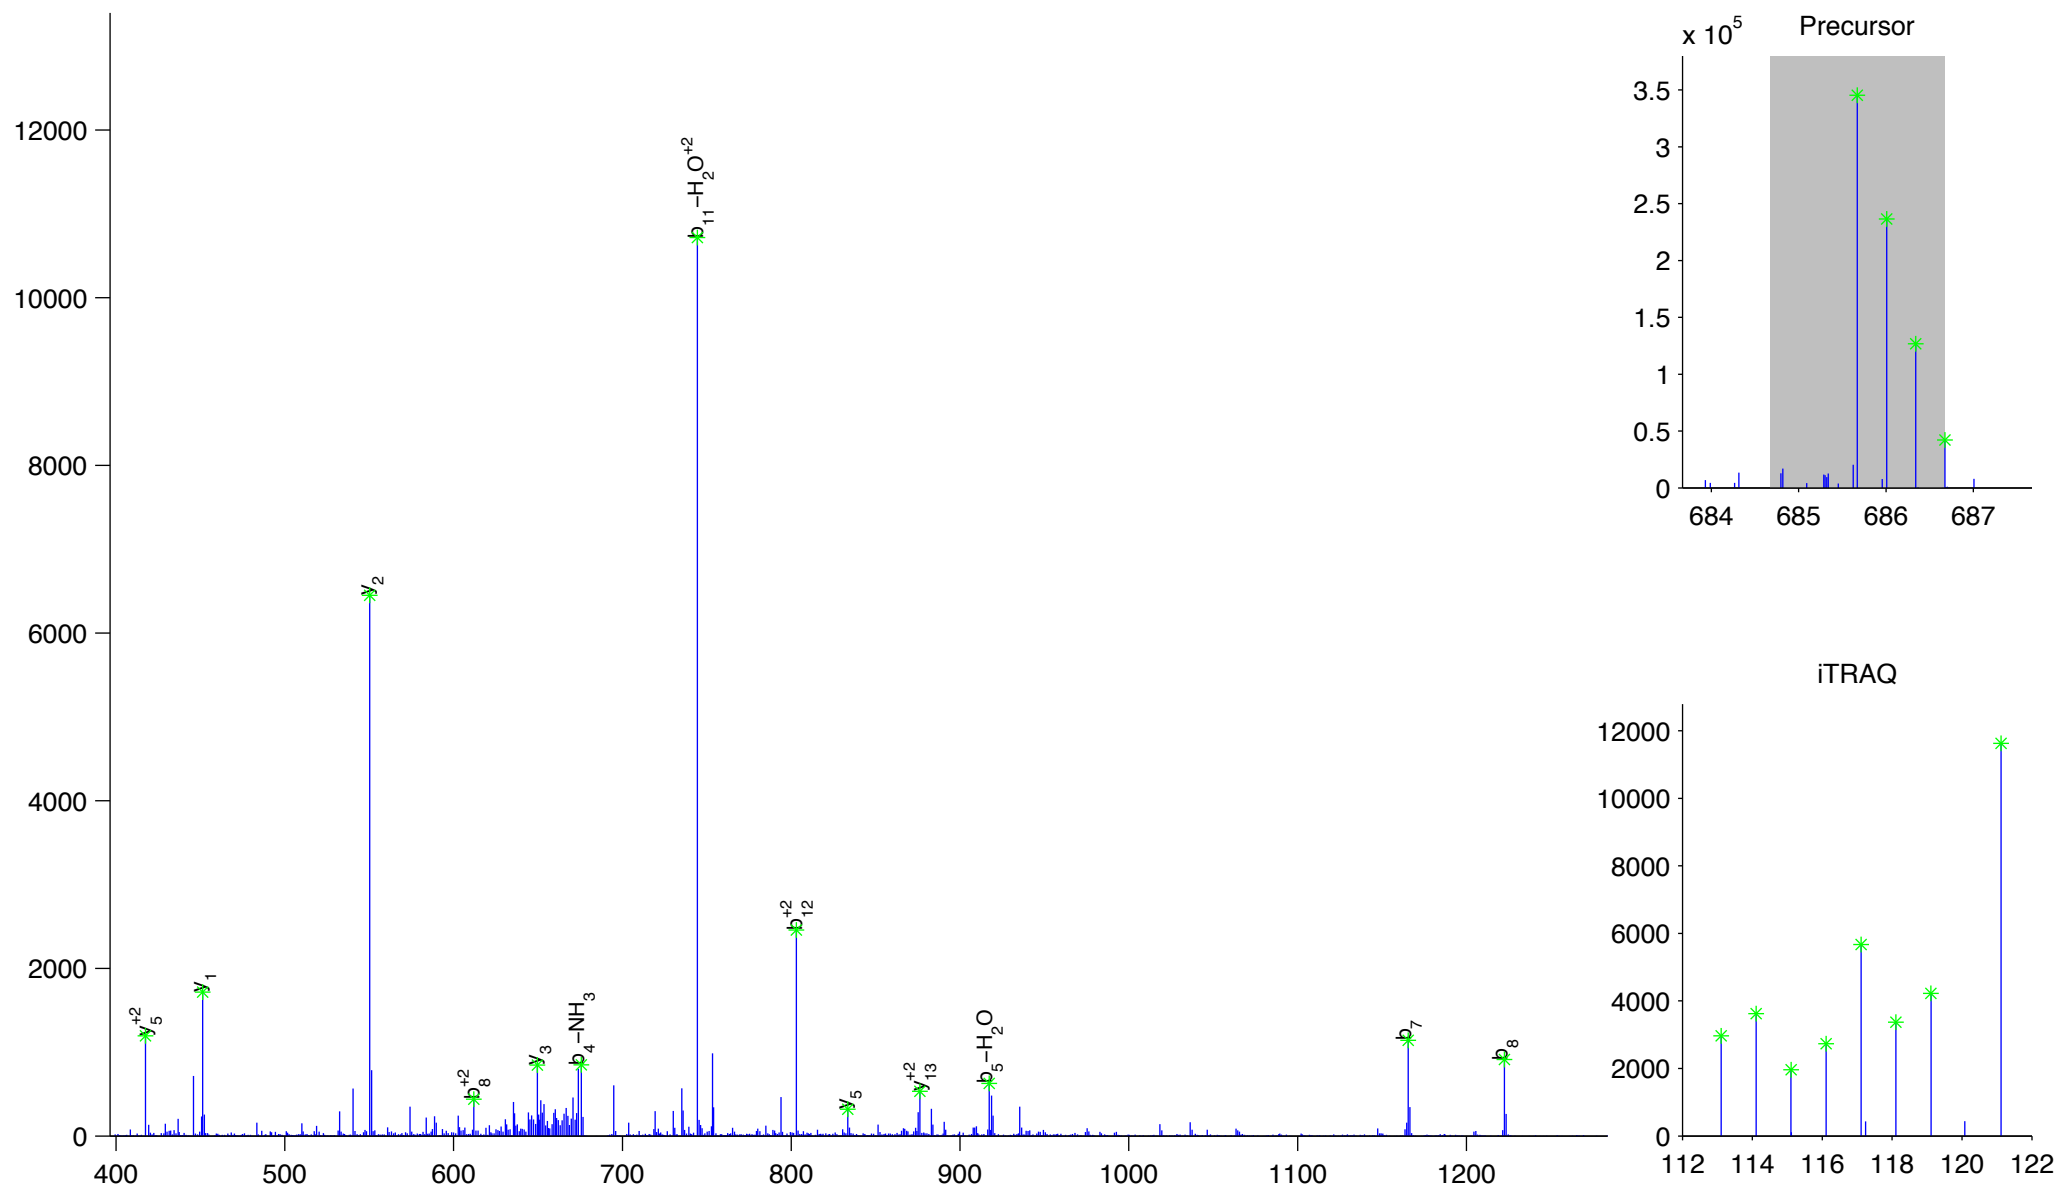

Q [ G ] S [ S ] D [ I ] y [ S ] T [ P ] E [ G ] K

src homology 2 domain containing transforming protein C3 [Homo sapiens]

Charge State: +2

Scan Number: 3743

File Name: HJ050711\_GBMxeno\_bio1\_E\_HANNAH.raw

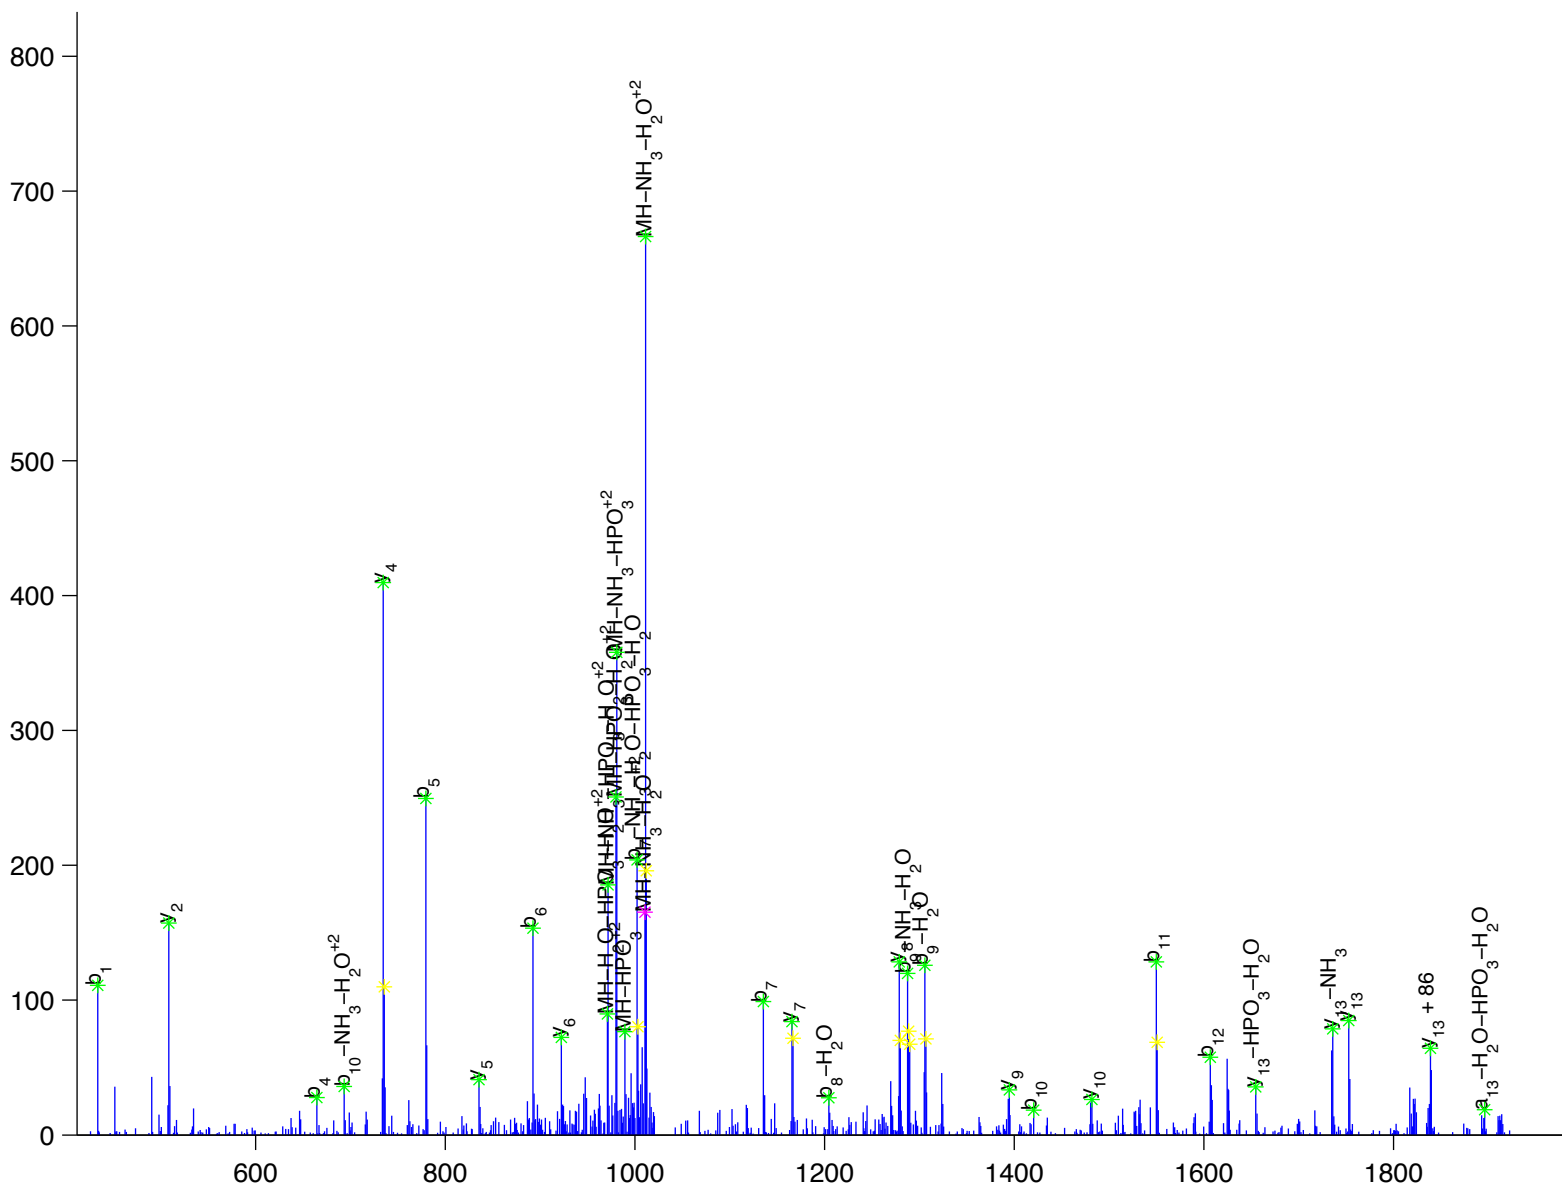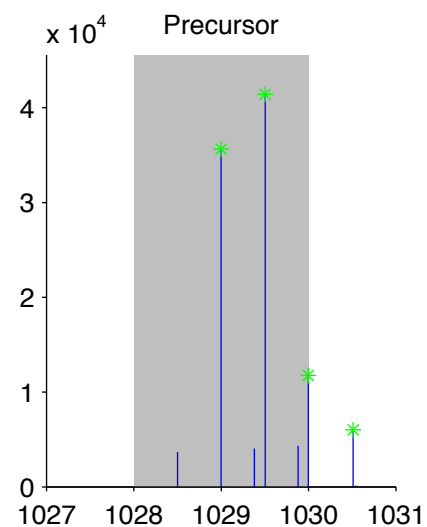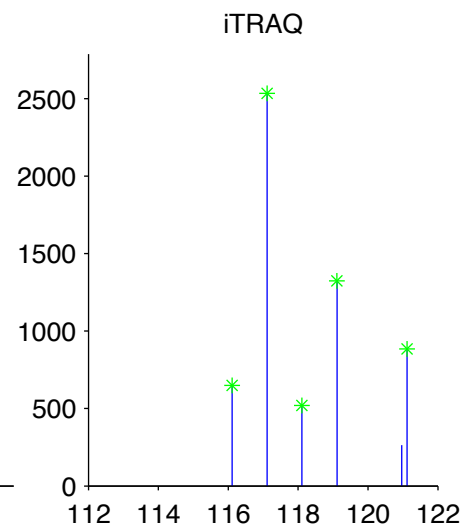



Q[G]S[S]D[I]y[S]T[P]E[G]K

src homology 2 domain containing transforming protein C3 [Homo sapiens]

Charge State: +3

Scan Number: 3755

File Name: HJ050711\_GBMxeno\_bio1\_E\_HANNAH.raw

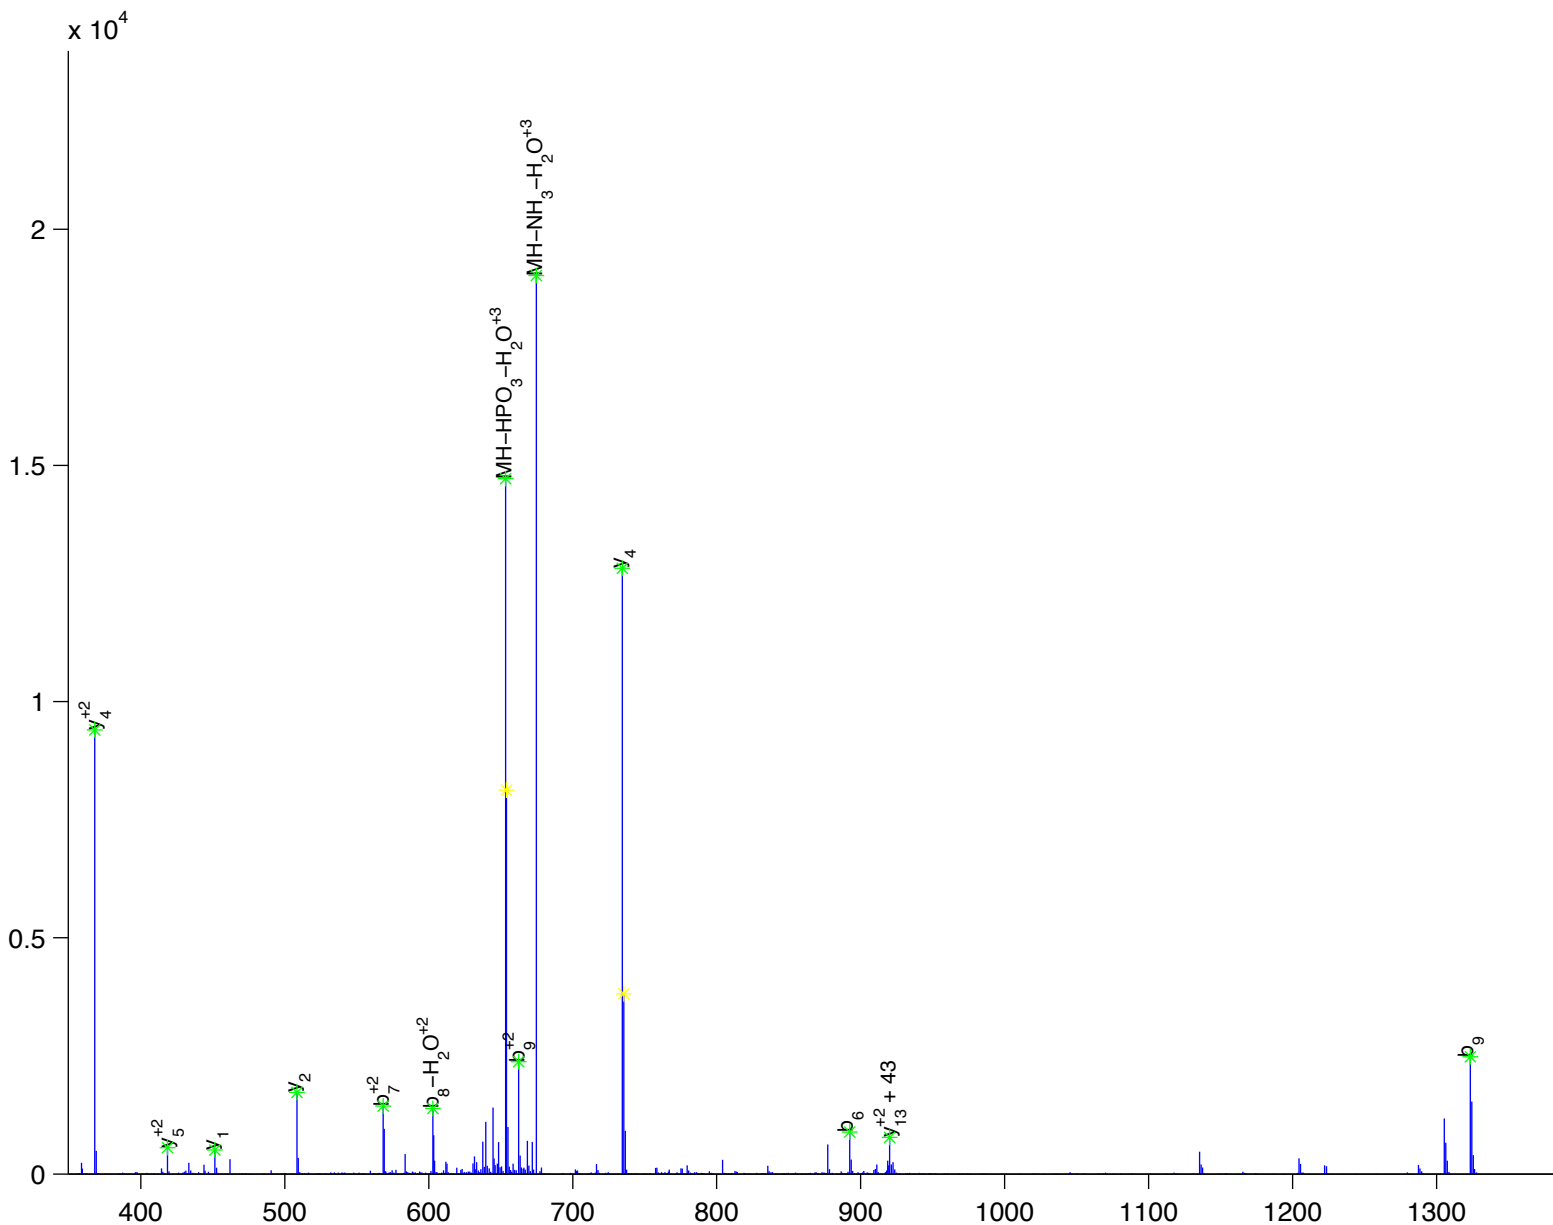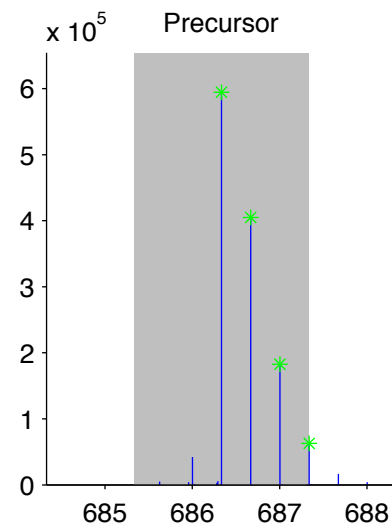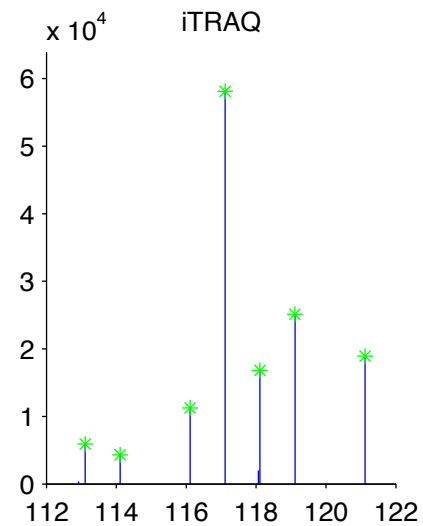

A [D] [D] [A] [D] [E] [F] [G] [y] [S] [R]

staphylococcal nuclease domain containing 1 [Homo sapiens]

Charge State: +2

Scan Number: 4944

File Name: HJ050711\_GBMxeno\_bio1\_E\_HANNAH.raw

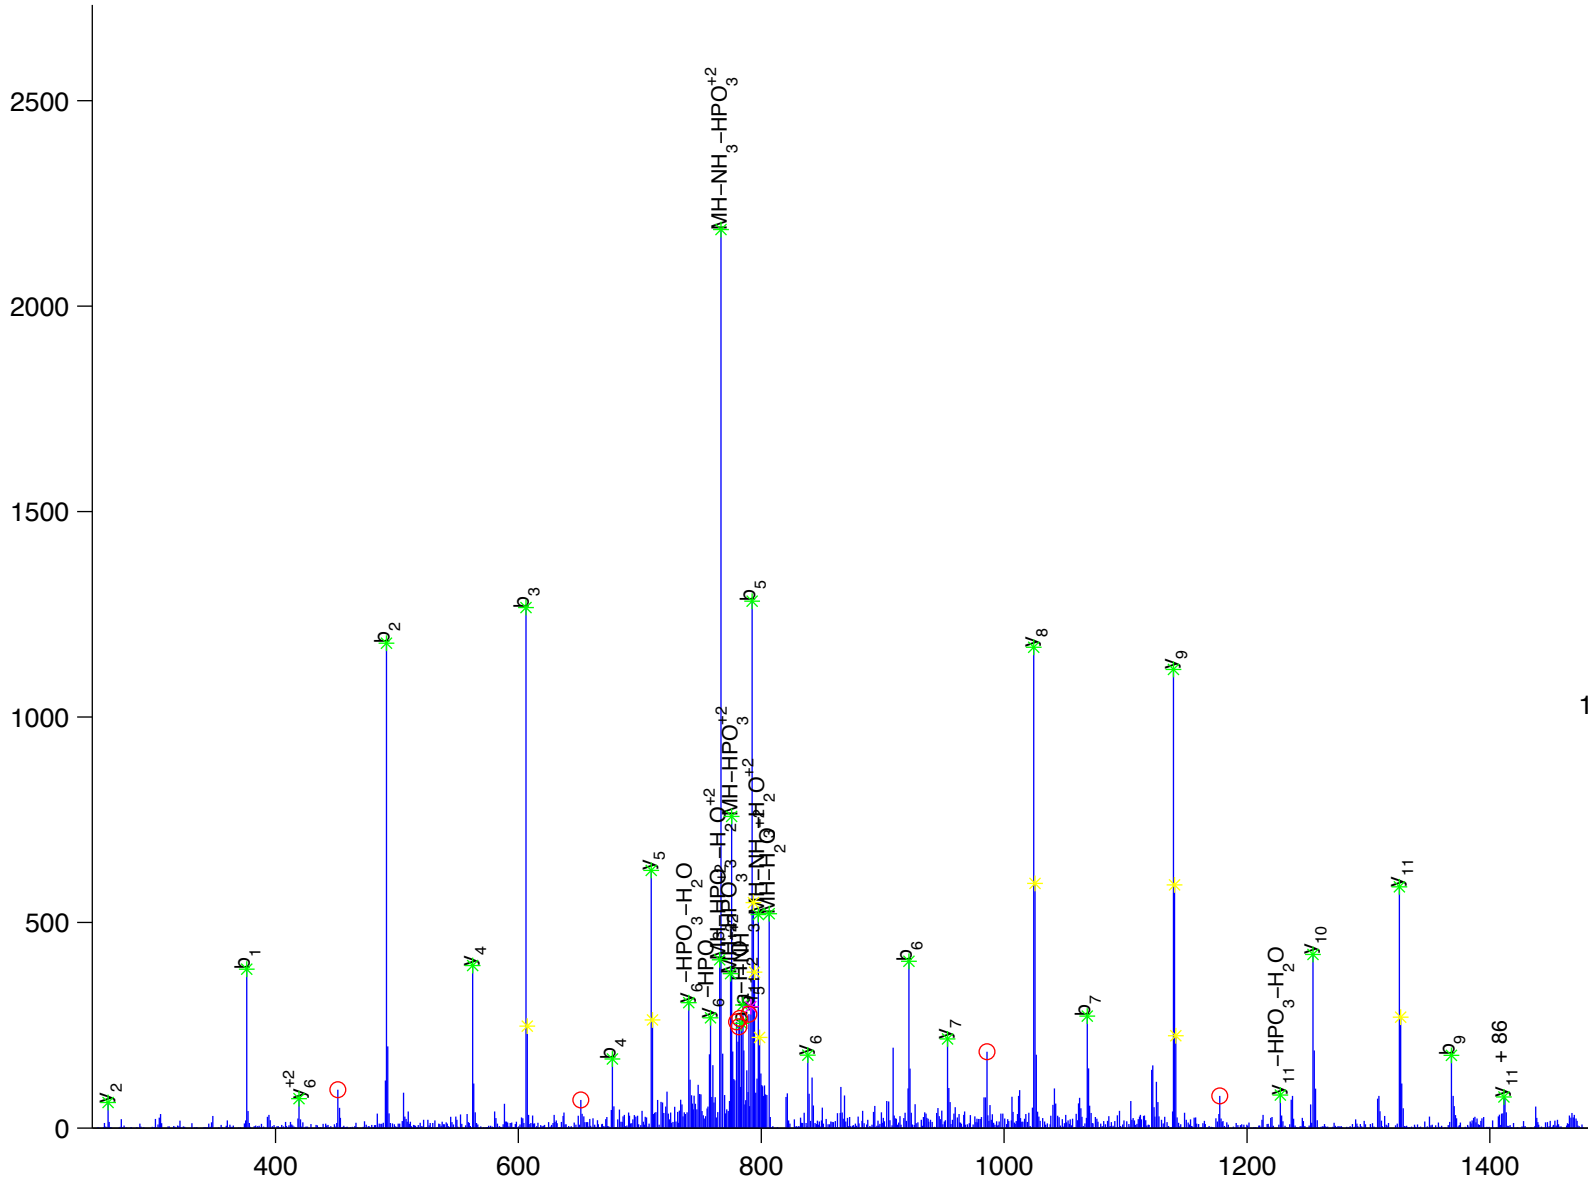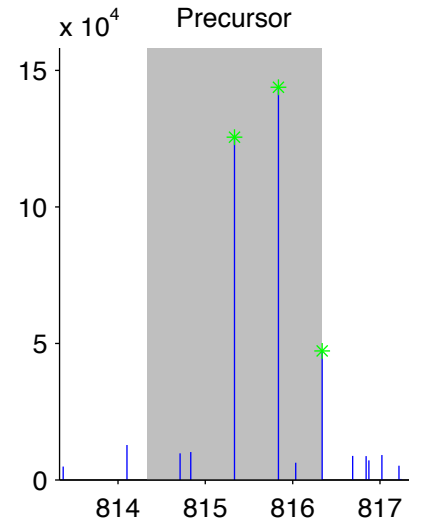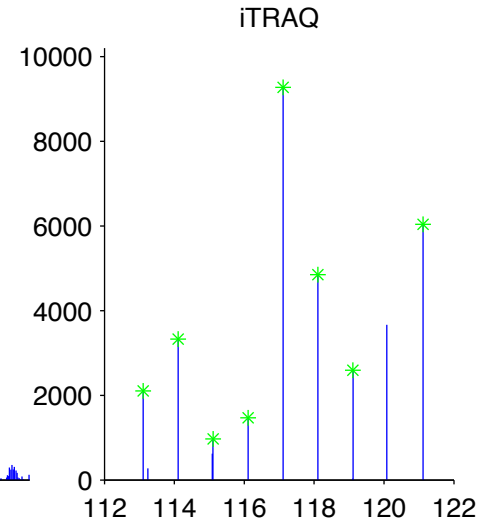

E [ y ] G [ M ] I [ Y ] L [ G ] K

staphylococcal nuclease domain containing 1 [Homo sapiens]

Charge State: +3

Scan Number: 7710

File Name: HJ050711\_GBMxeno\_bio1\_E\_HANNAH.raw

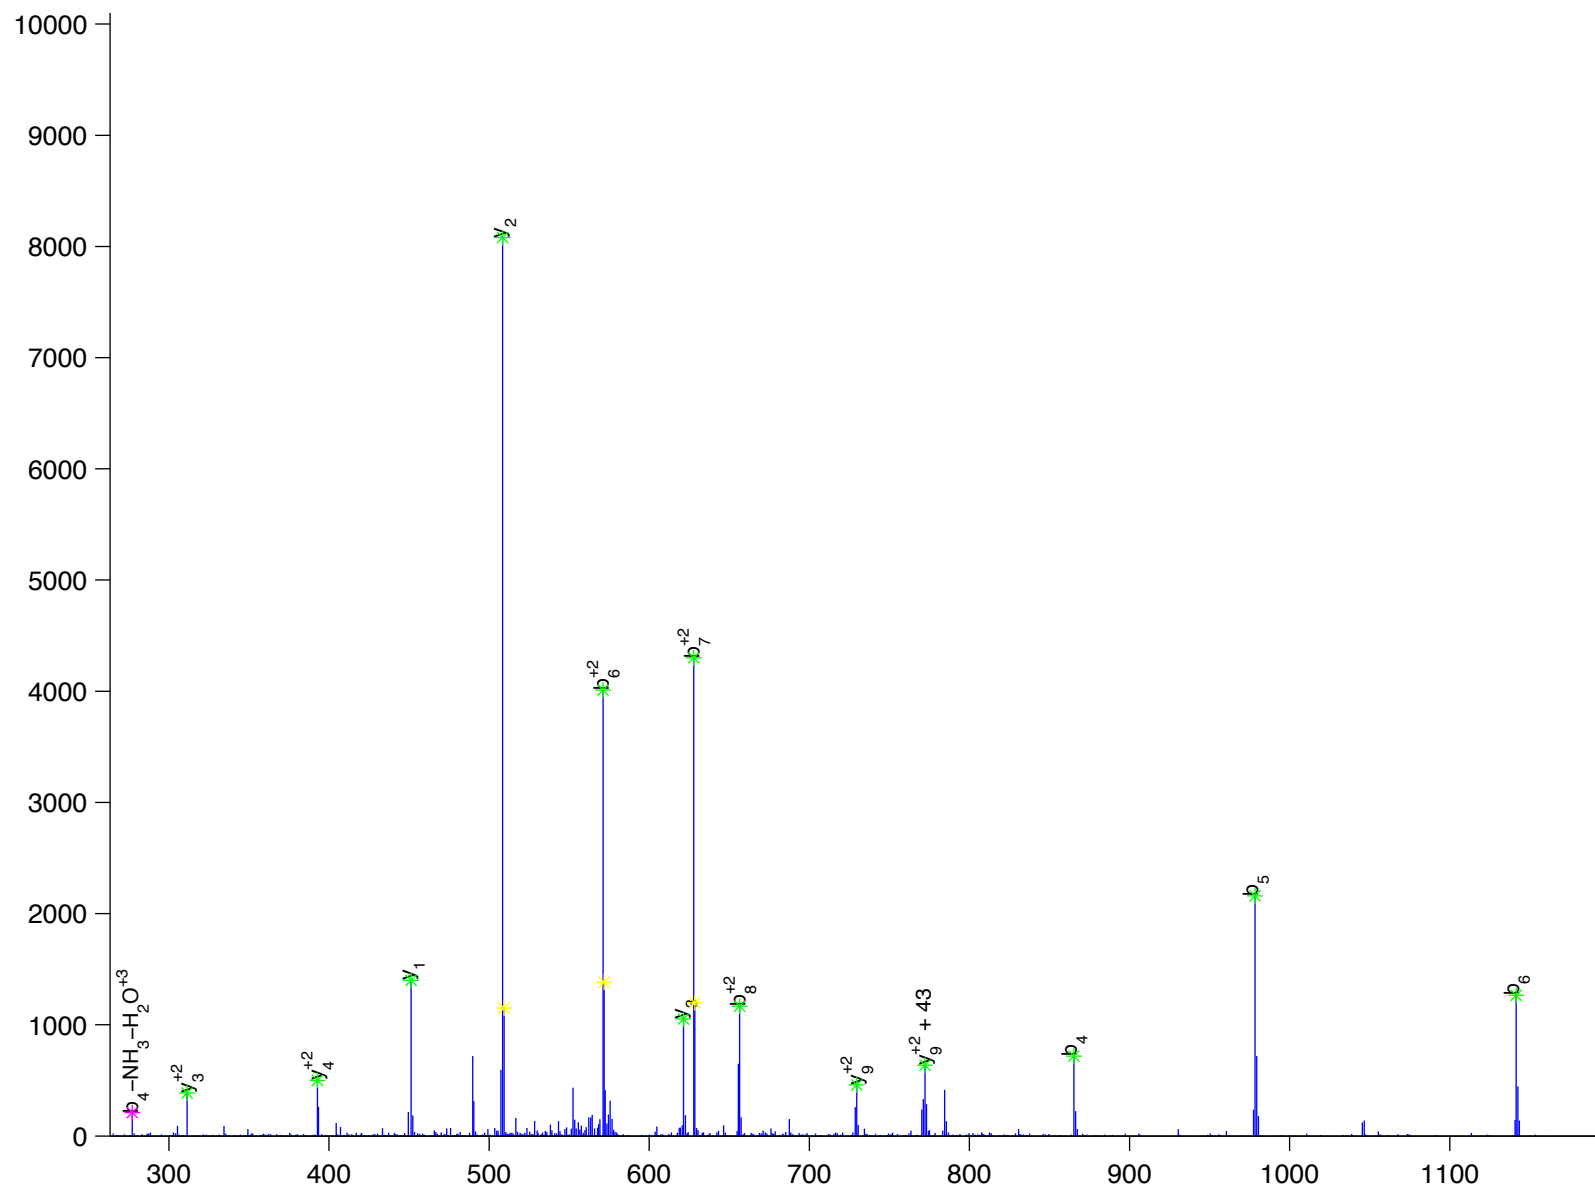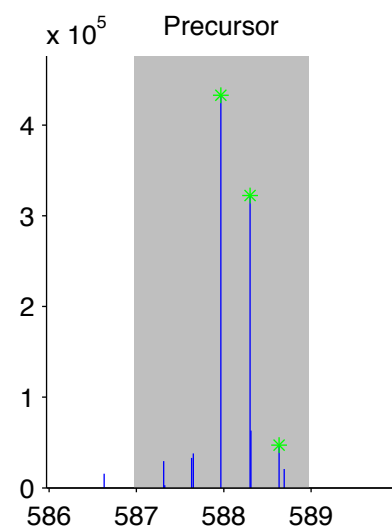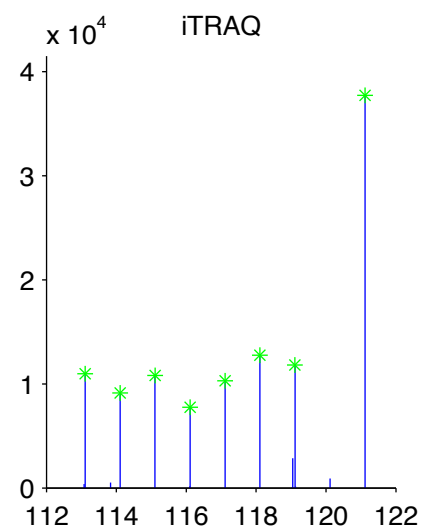

R[D]N[E]V[D]G[Q]D[y]H[F]V[V]S[R]

synapse-associated protein 102 isoform a [Homo sapiens]

Charge State: +3

Scan Number: 4455

File Name: HJ050711\_GBMxeno\_bio1\_E\_HANNAH.raw

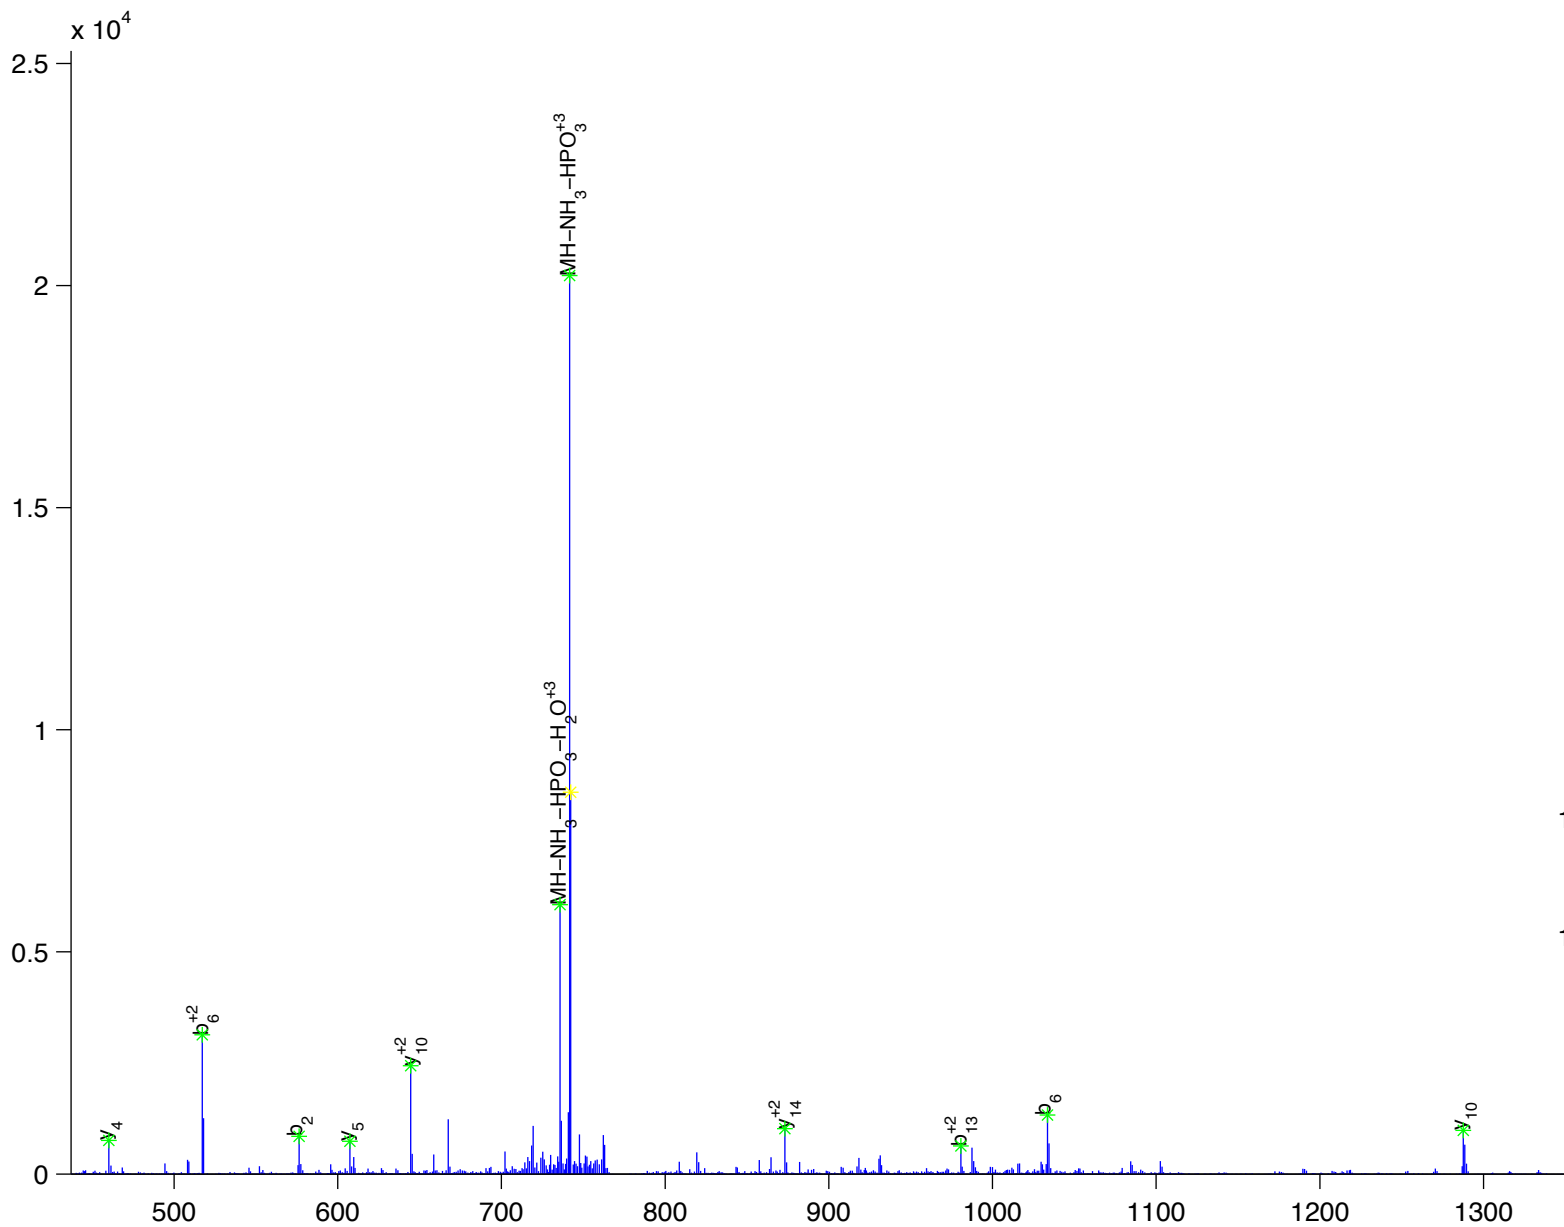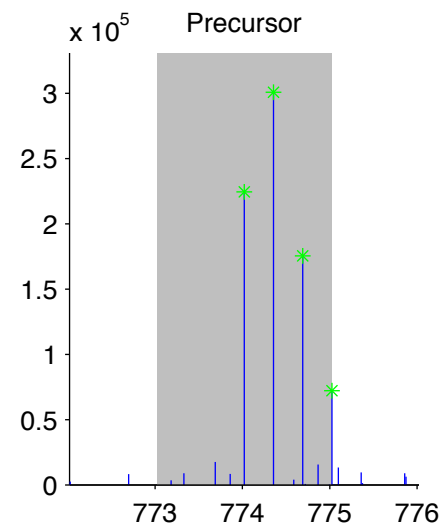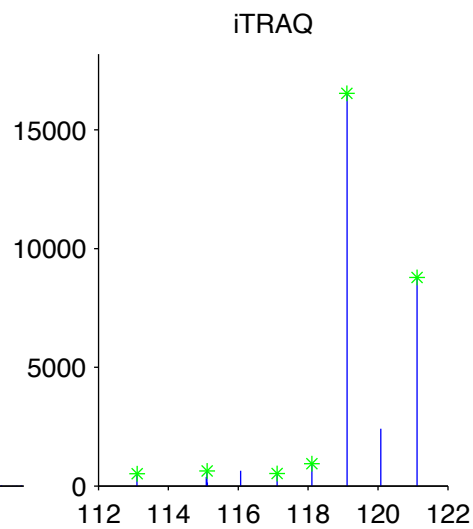

D [ N ] E [ V ] D [ G ] Q [ D ] y [ H ] F [ V ] V [ S ] R

synapse-associated protein 102 isoform a [Homo sapiens]

Charge State: +3

Scan Number: 5475

File Name: HJ050711\_GBMxeno\_bio1\_E\_HANNAH.raw

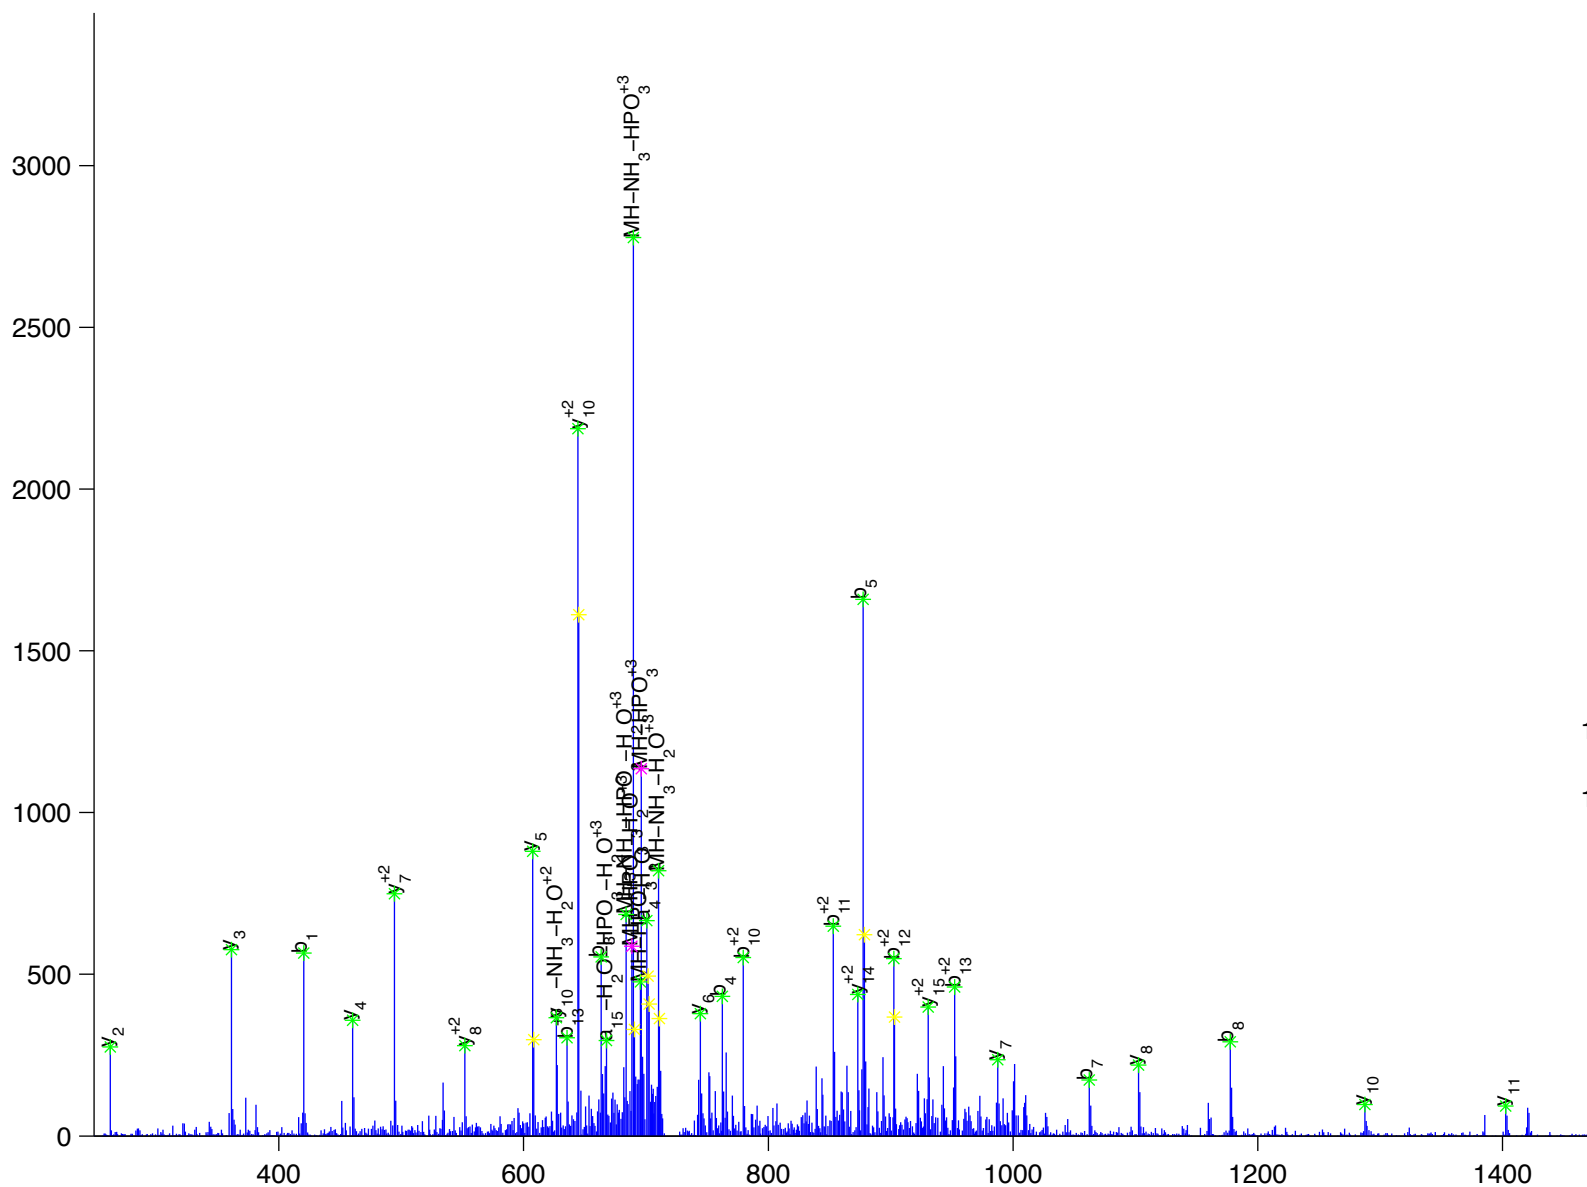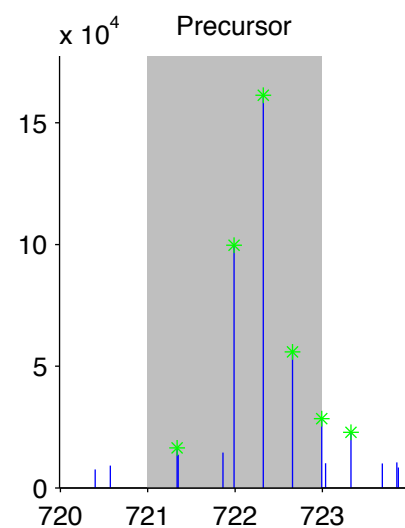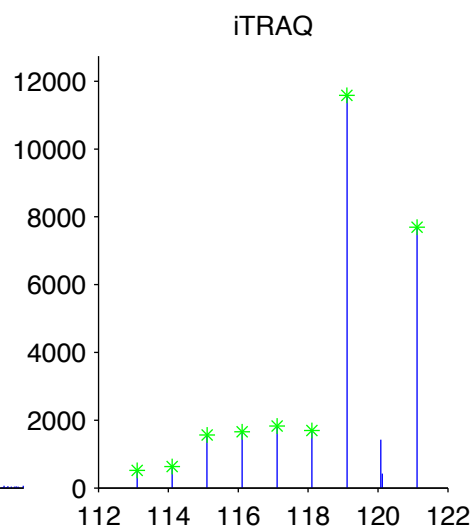

E [ c [ D [ y [ S [ I [ D [ G [ I [ N [ R [

taln 2 [Homo sapiens]

Charge State: +2

Scan Number: 5471

File Name: HJ050711\_GBMxeno\_bio1\_E\_HANNAH.raw

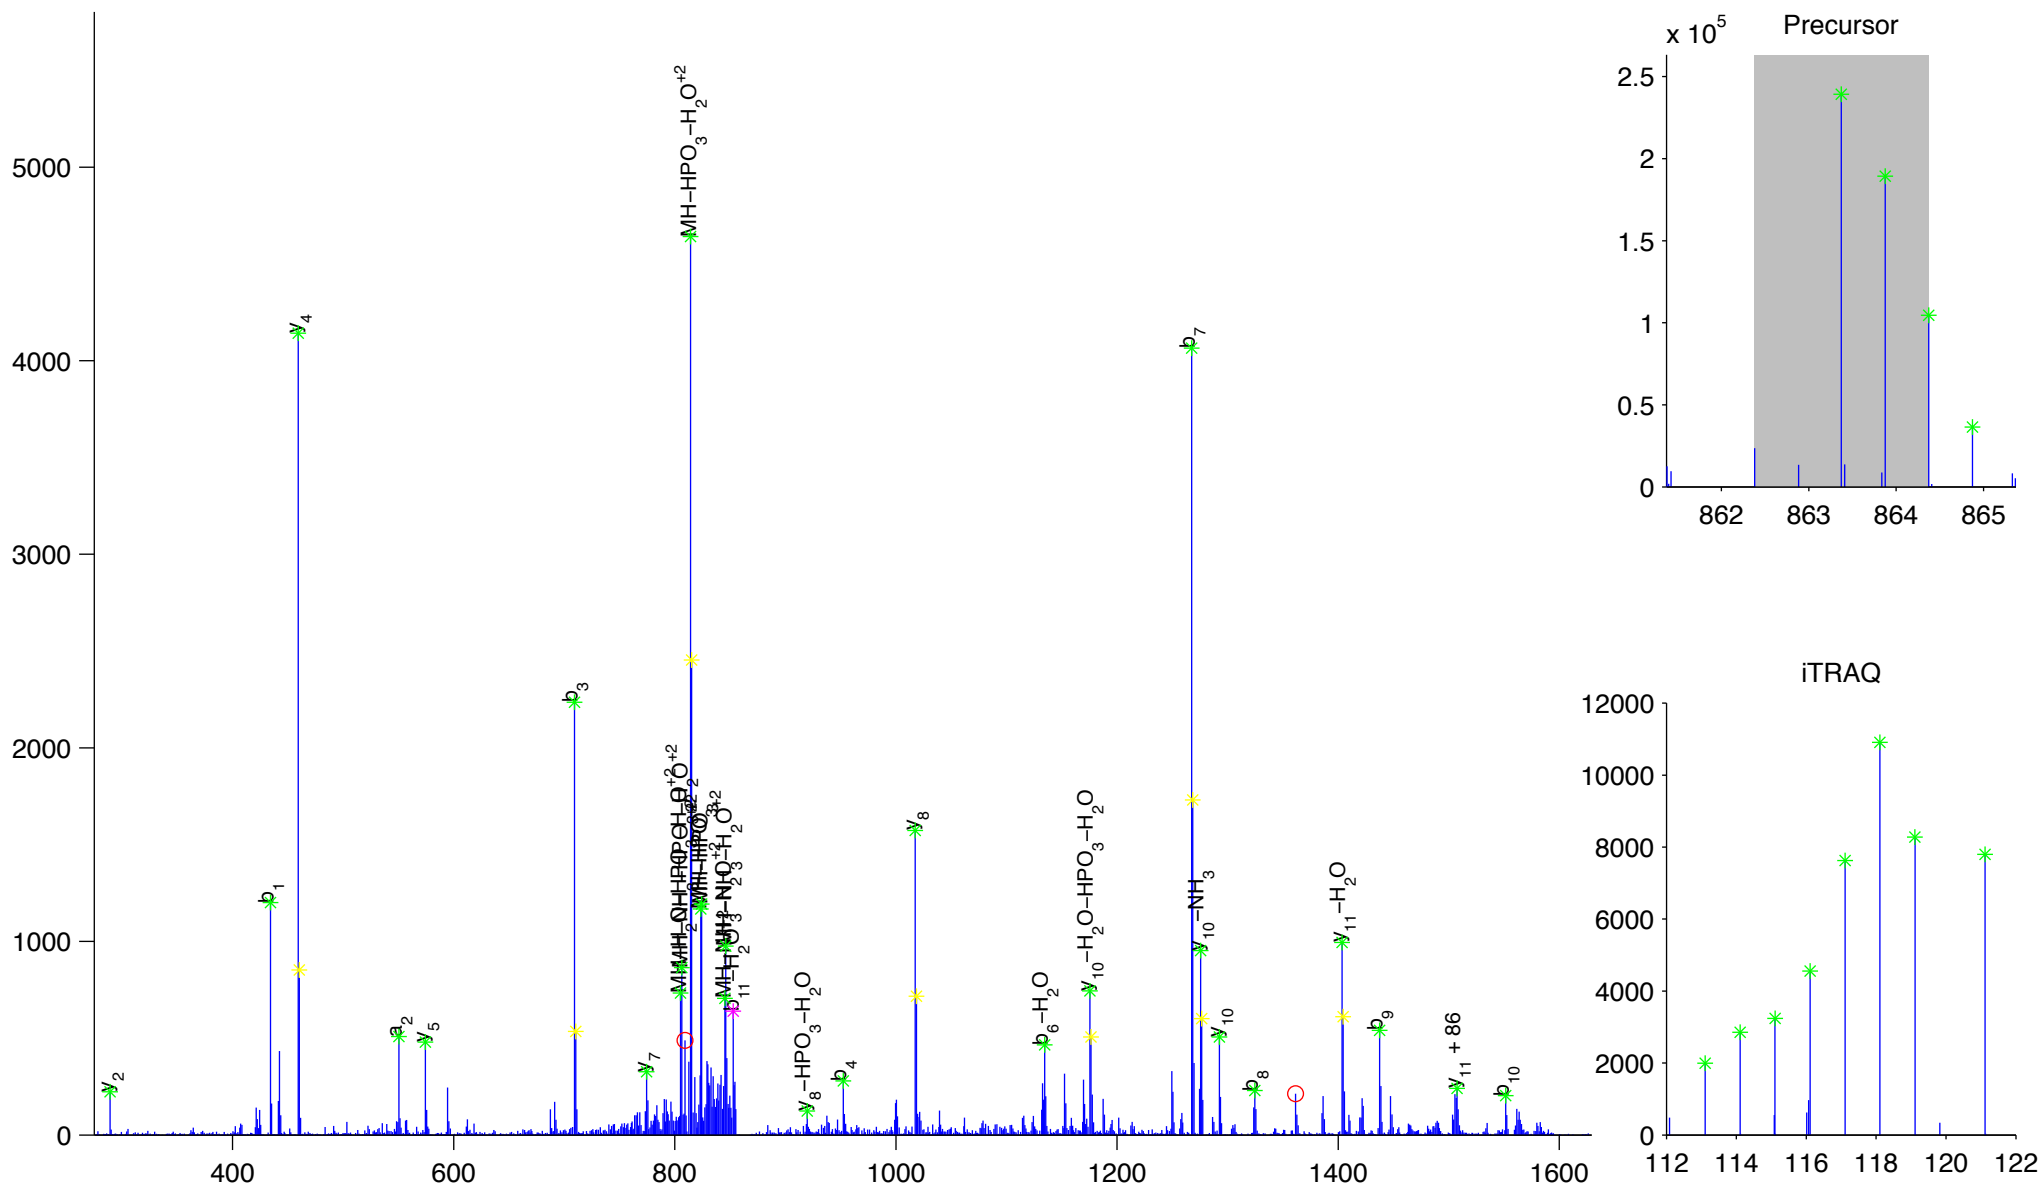

Q R Q y L E L E c R

TAO kinase 1 [Homo sapiens]

Charge State: +3

Scan Number: 4541

File Name: HJ050711\_GBMxeno\_bio1\_E\_HANNAH.raw

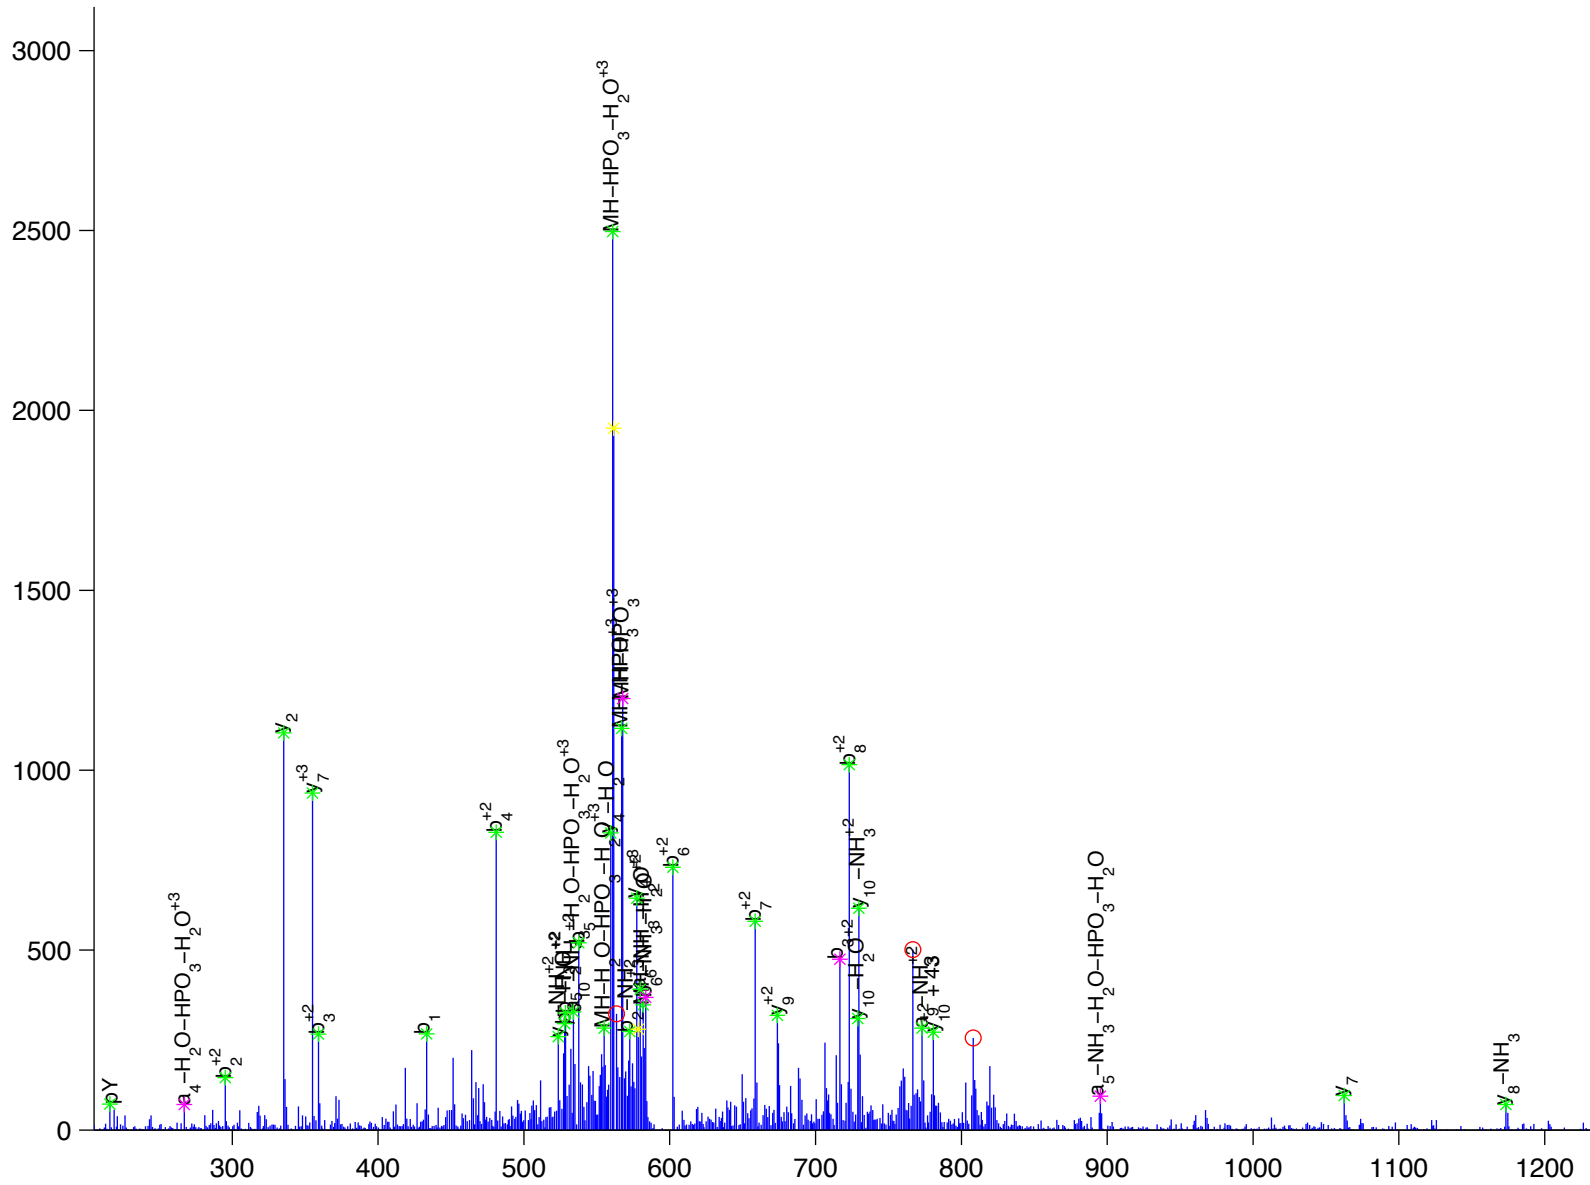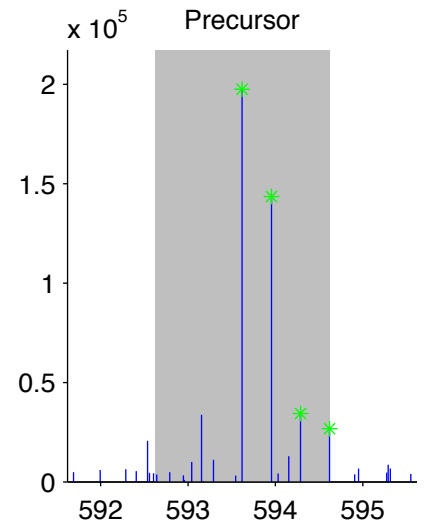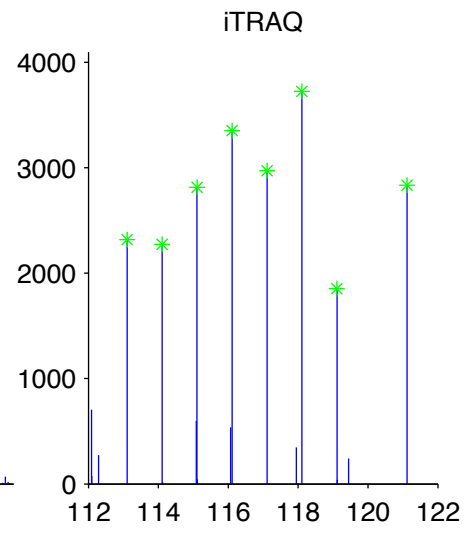

G<sup>]</sup>y<sup>]</sup>L<sup>]</sup>Y<sup>]</sup>L<sup>]</sup>A<sup>]</sup>I<sup>]</sup>E<sup>]</sup>Y<sup>]</sup>A<sup>]</sup>P<sup>]</sup>H<sup>]</sup>G<sup>]</sup>N<sup>]</sup>L<sup>]</sup>L<sup>]</sup>D<sup>]</sup>F<sup>]</sup>L<sup>]</sup>R<sup>]</sup>

TEK tyrosine kinase, endothelial precursor [Homo sapiens]

Charge State: +3

Scan Number: 10146

File Name: HJ050711\_GBMxeno\_bio1\_E\_HANNAH.raw

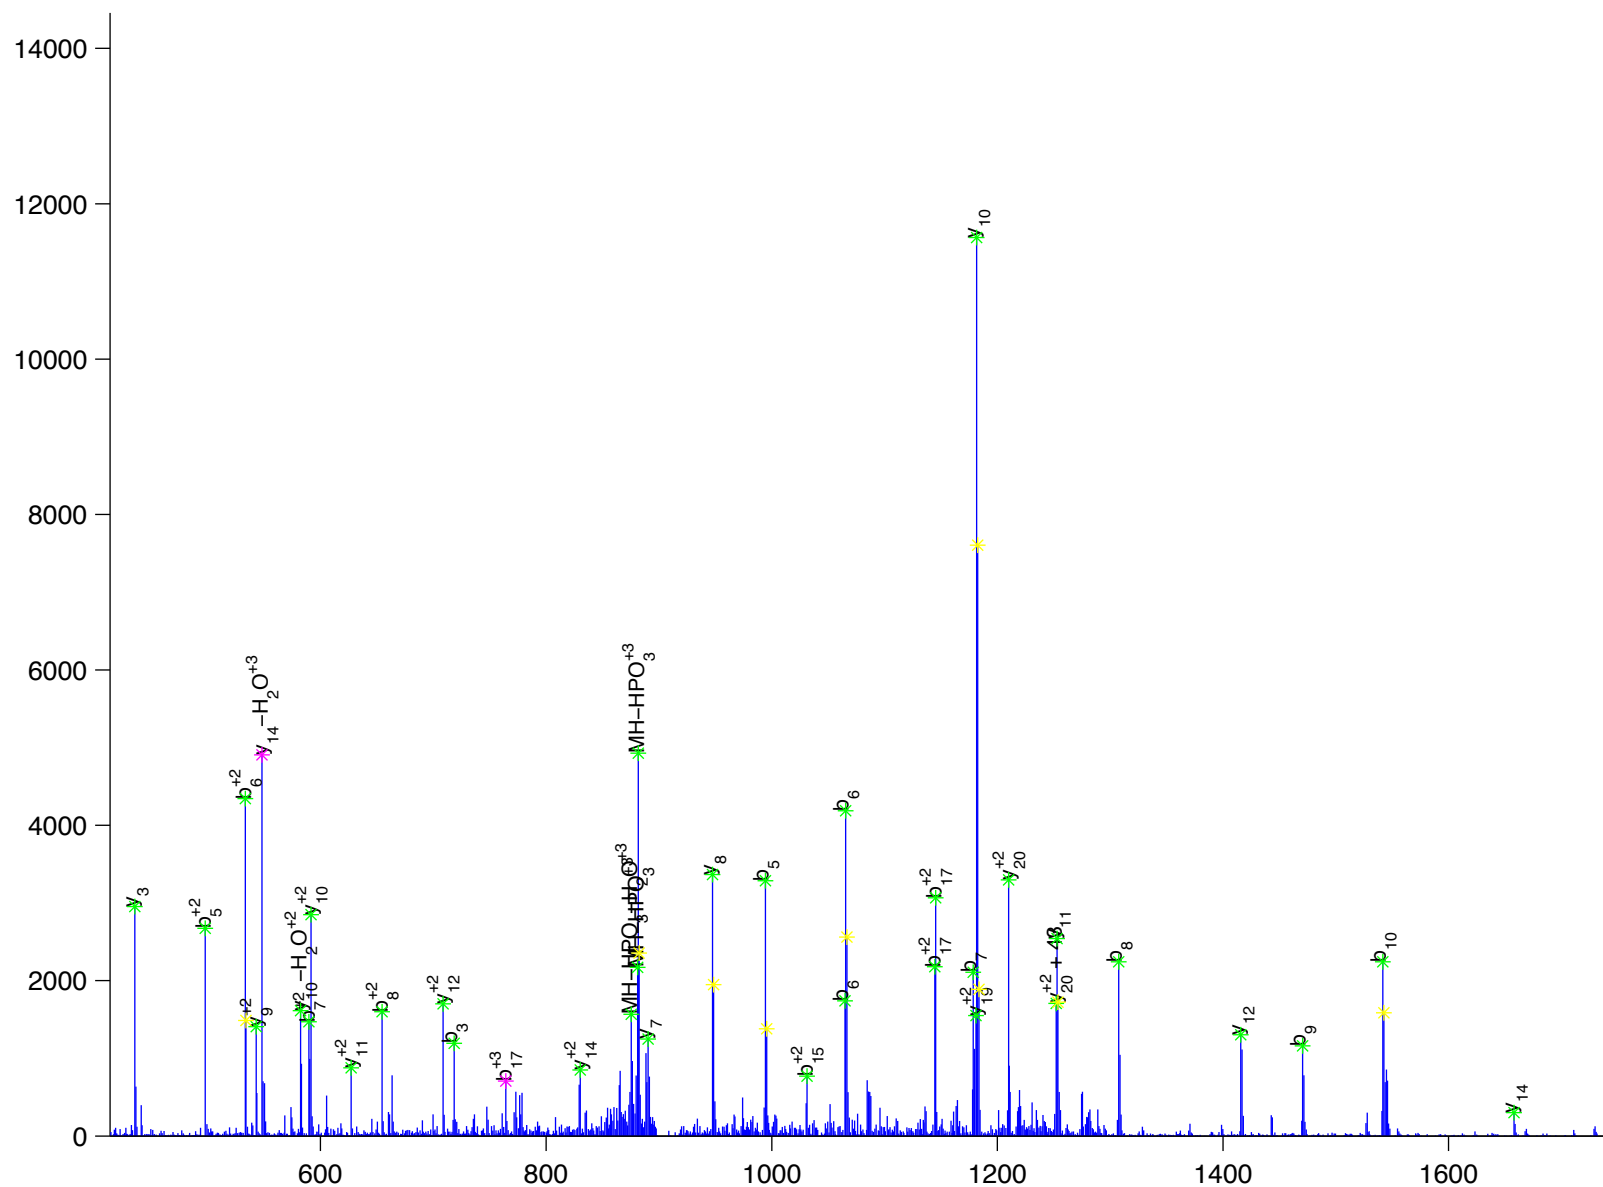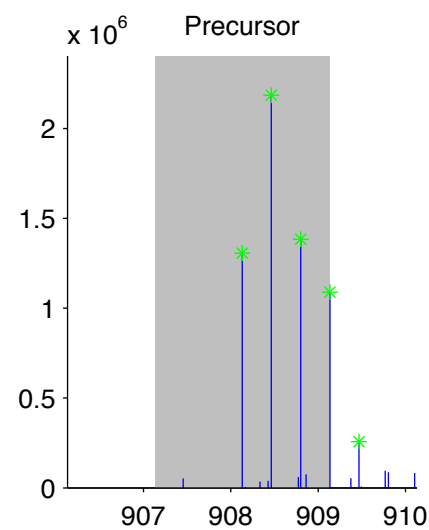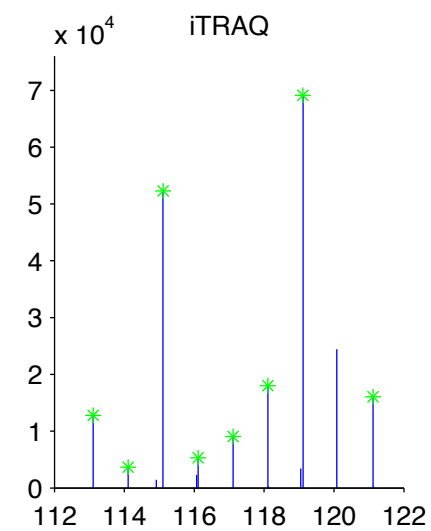



S[A]F[S]N[L]F[G]G[E]P[L]S]y]T]R

transferrin receptor [Homo sapiens]

Charge State: +3

Scan Number: 9524

File Name: HJ050711\_GBMxeno\_bio1\_E\_HANNAH.raw

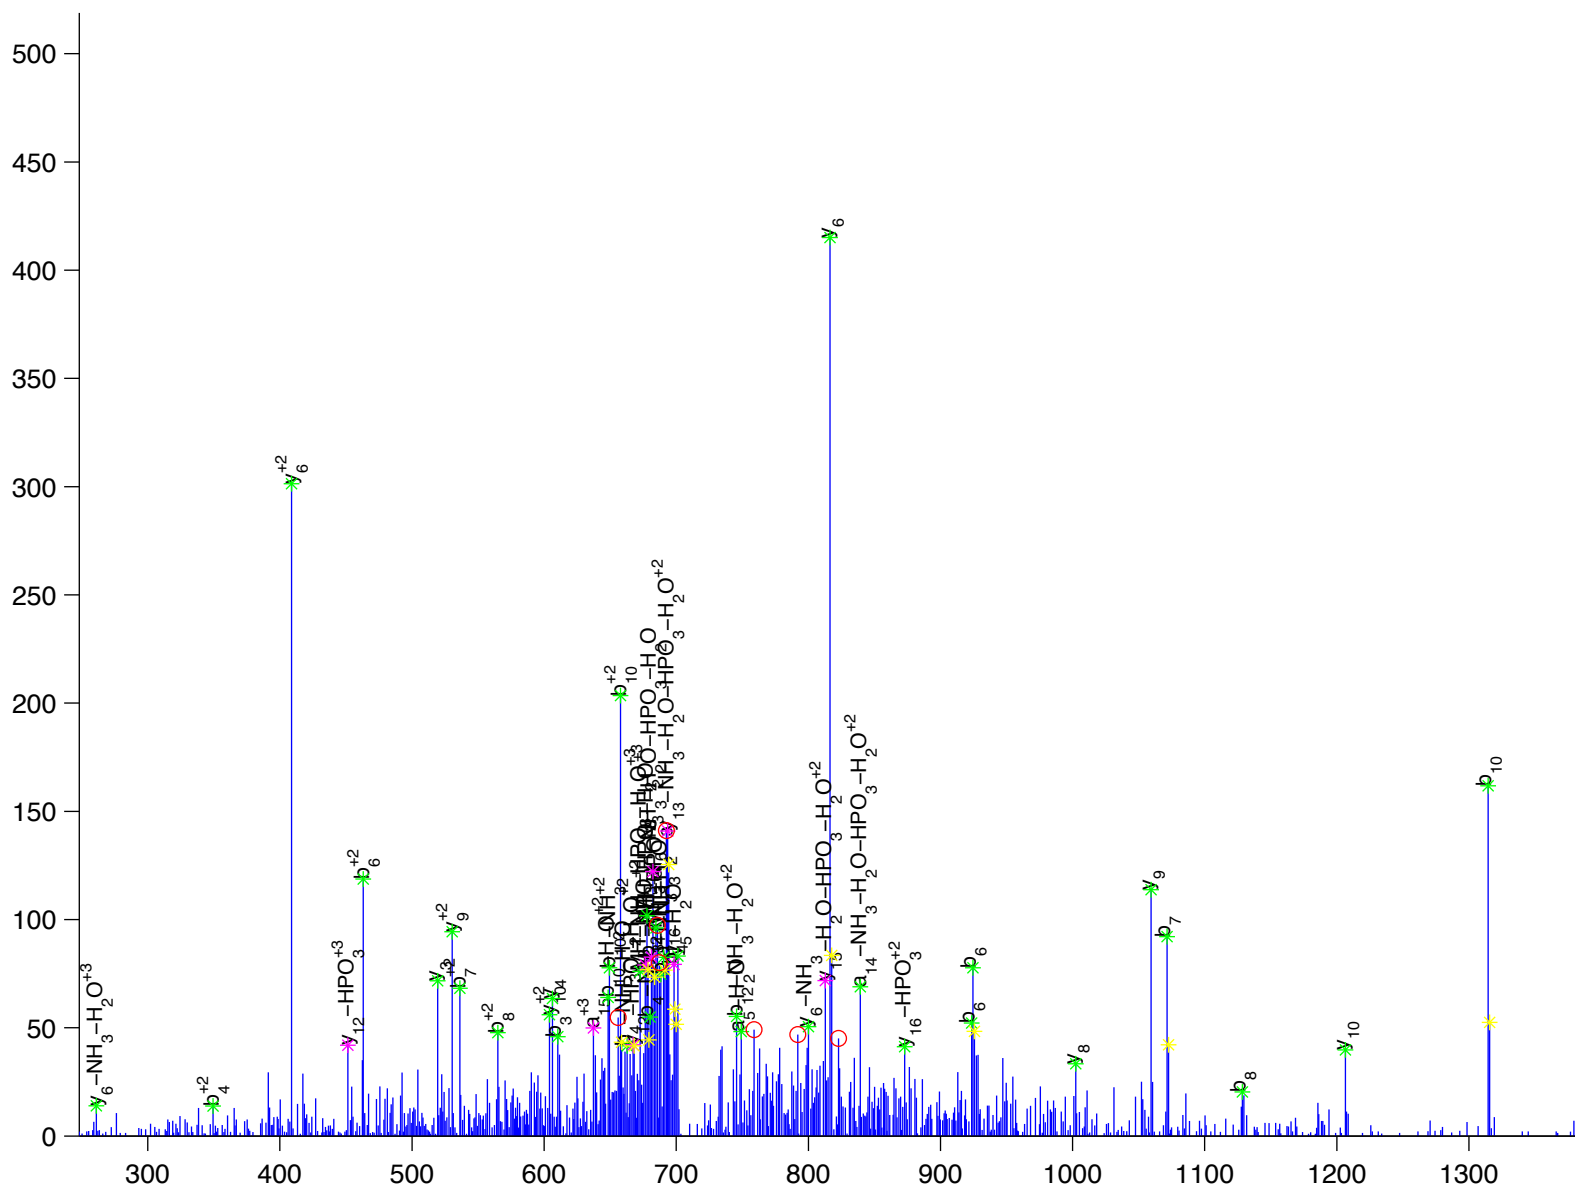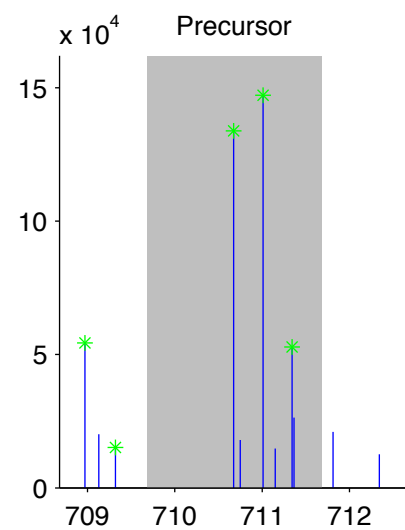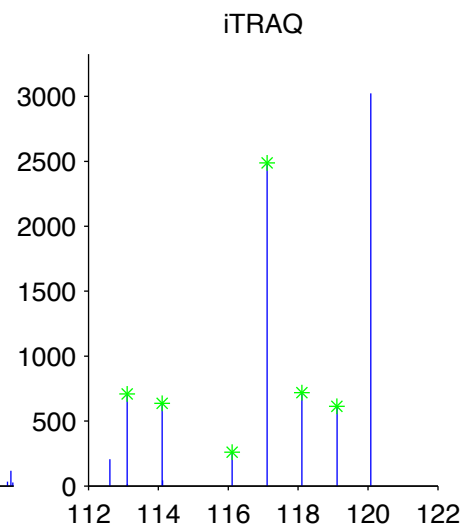

N [ m ] A [ E ] Q [ I ] I [ Q ] E [ I ] y [ S ] Q [ I ] Q [ S ] K

transketolase [Homo sapiens]

Charge State: +3

Scan Number: 10005

File Name: HJ050711\_GBMxeno\_bio1\_E\_HANNAH.raw

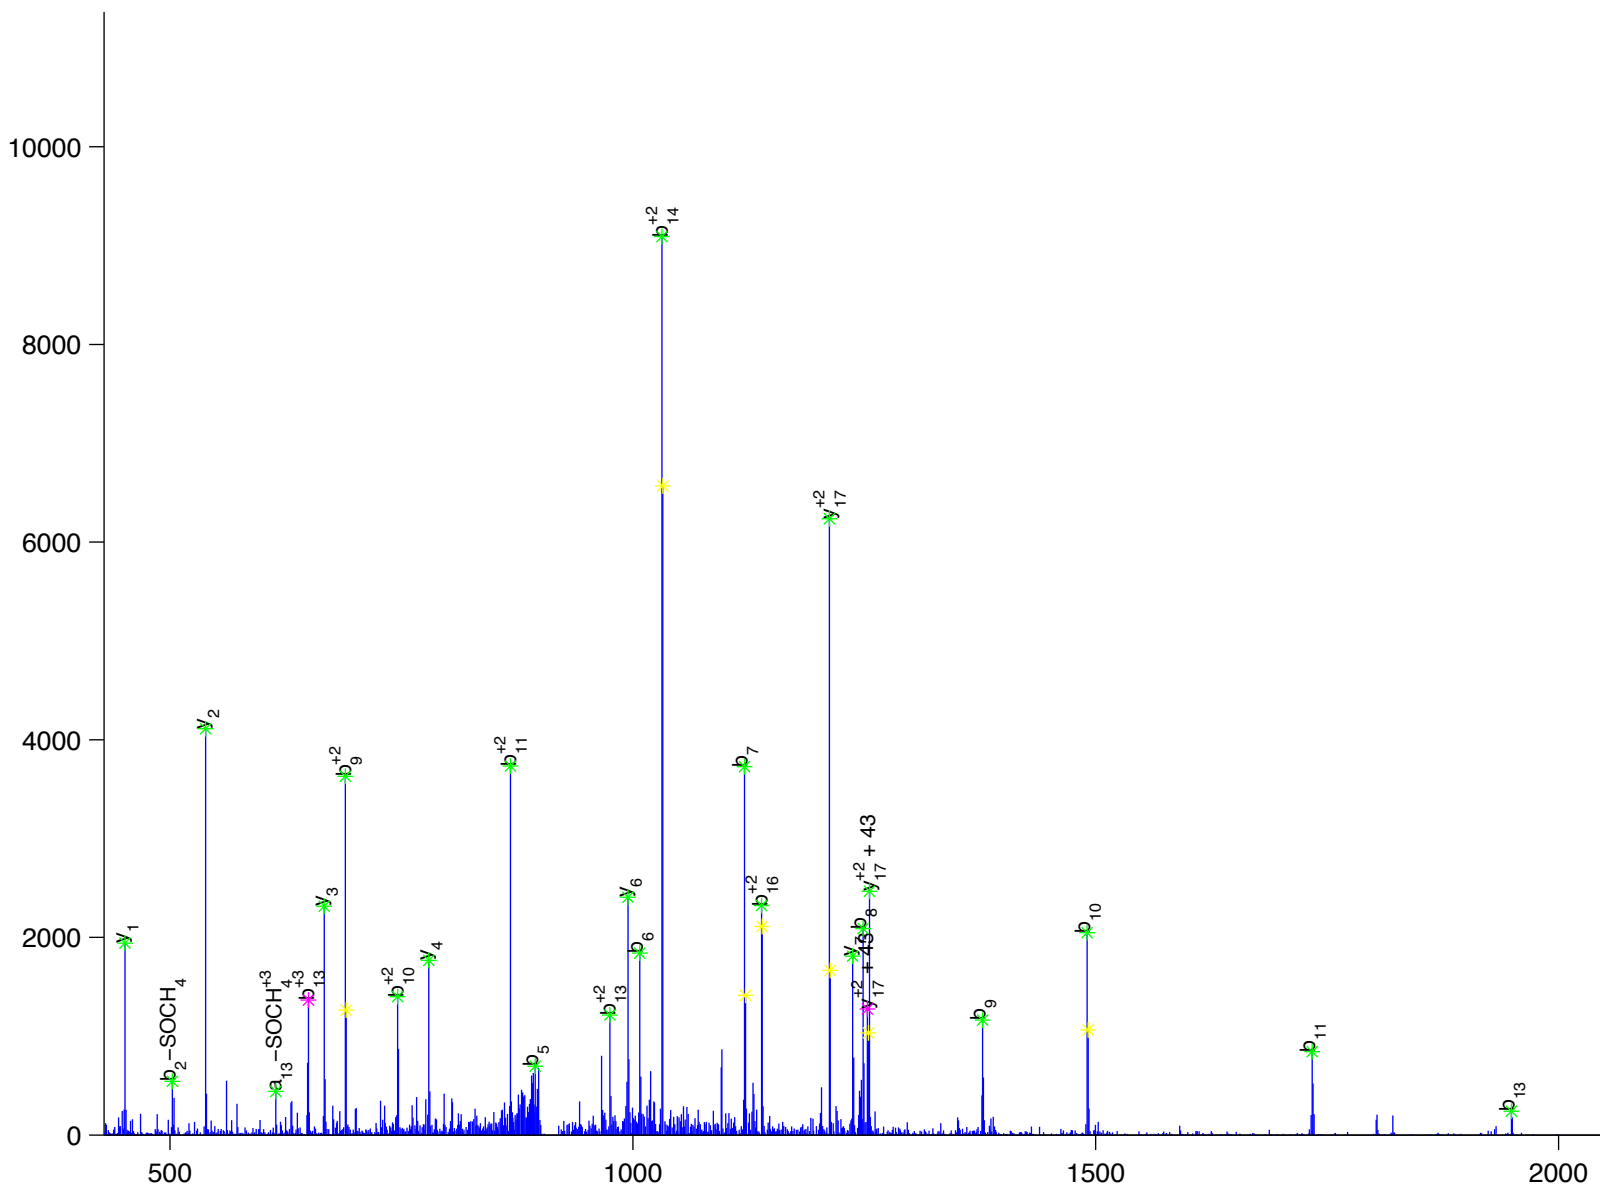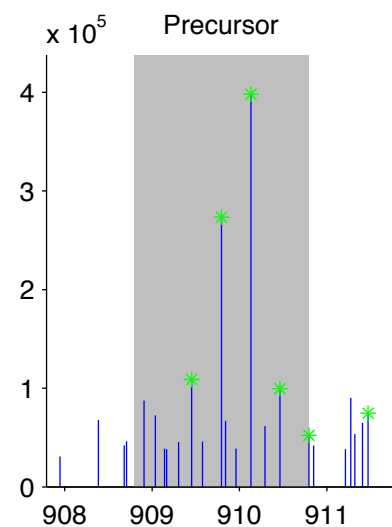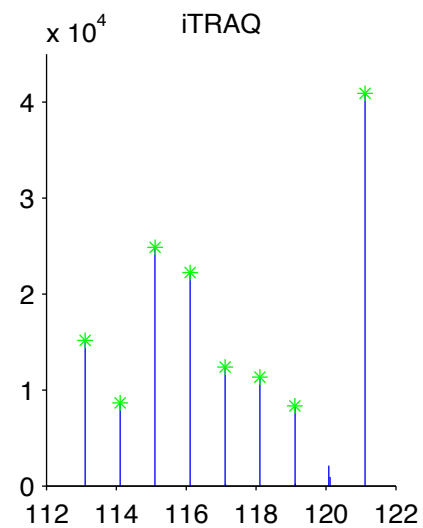

N [ m ] A [ E ] Q [ I ] I [ Q ] E [ I ] y [ S ] Q [ I ] Q [ S ] K

transketolase [Homo sapiens]

Charge State: +4

Scan Number: 10022

File Name: HJ050711\_GBMxeno\_bio1\_E\_HANNAH.raw

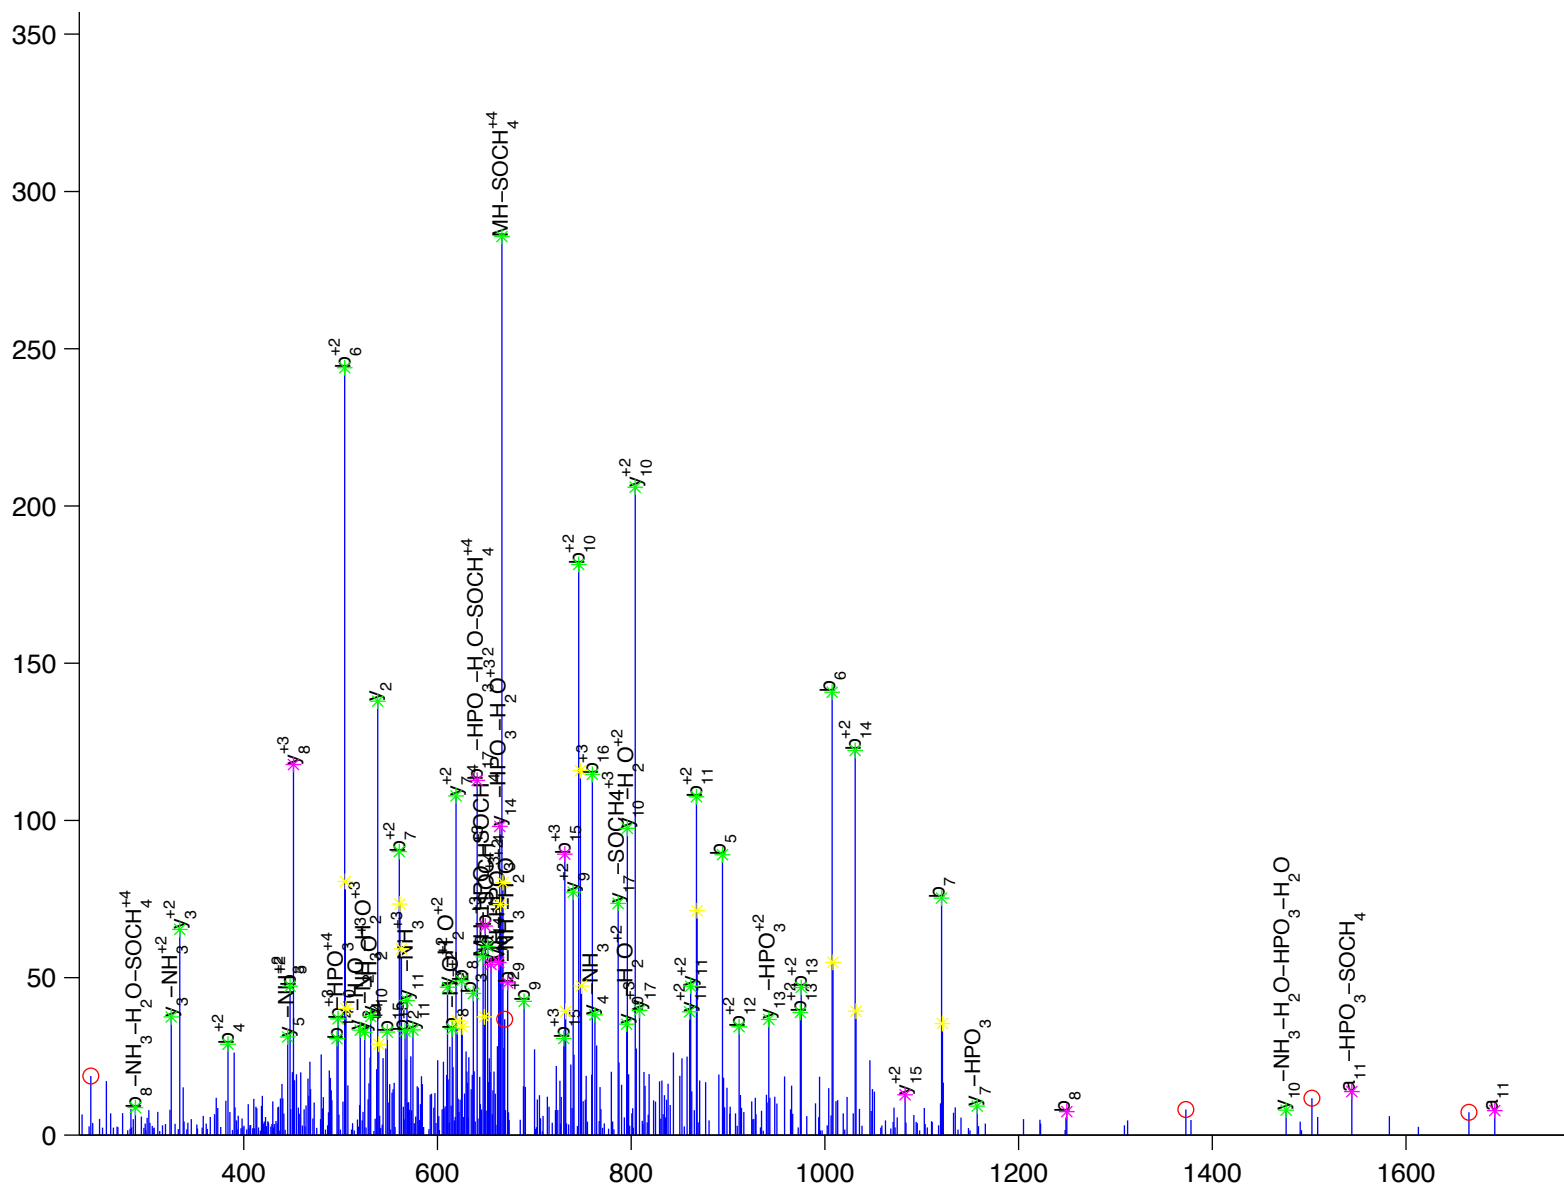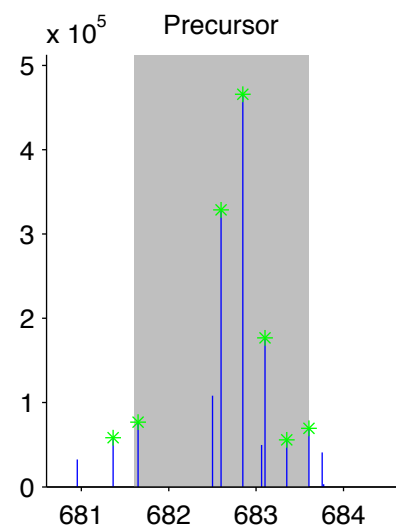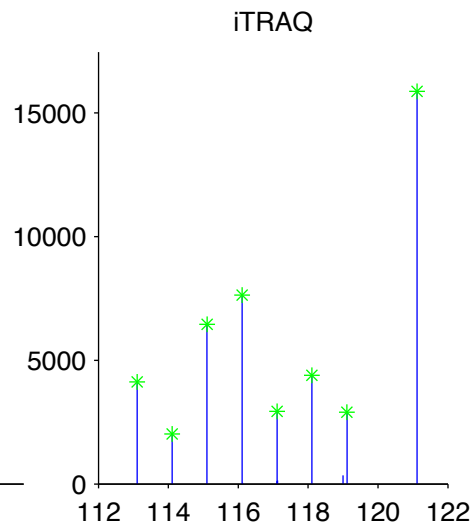

N [ M ] A [ E ] Q [ I ] I [ Q ] E [ I ] y [ S ] Q [ I ] Q [ S ] K

transketolase [Homo sapiens]

Charge State: +3

Scan Number: 10194

File Name: HJ050711\_GBMxeno\_bio1\_E\_HANNAH.raw

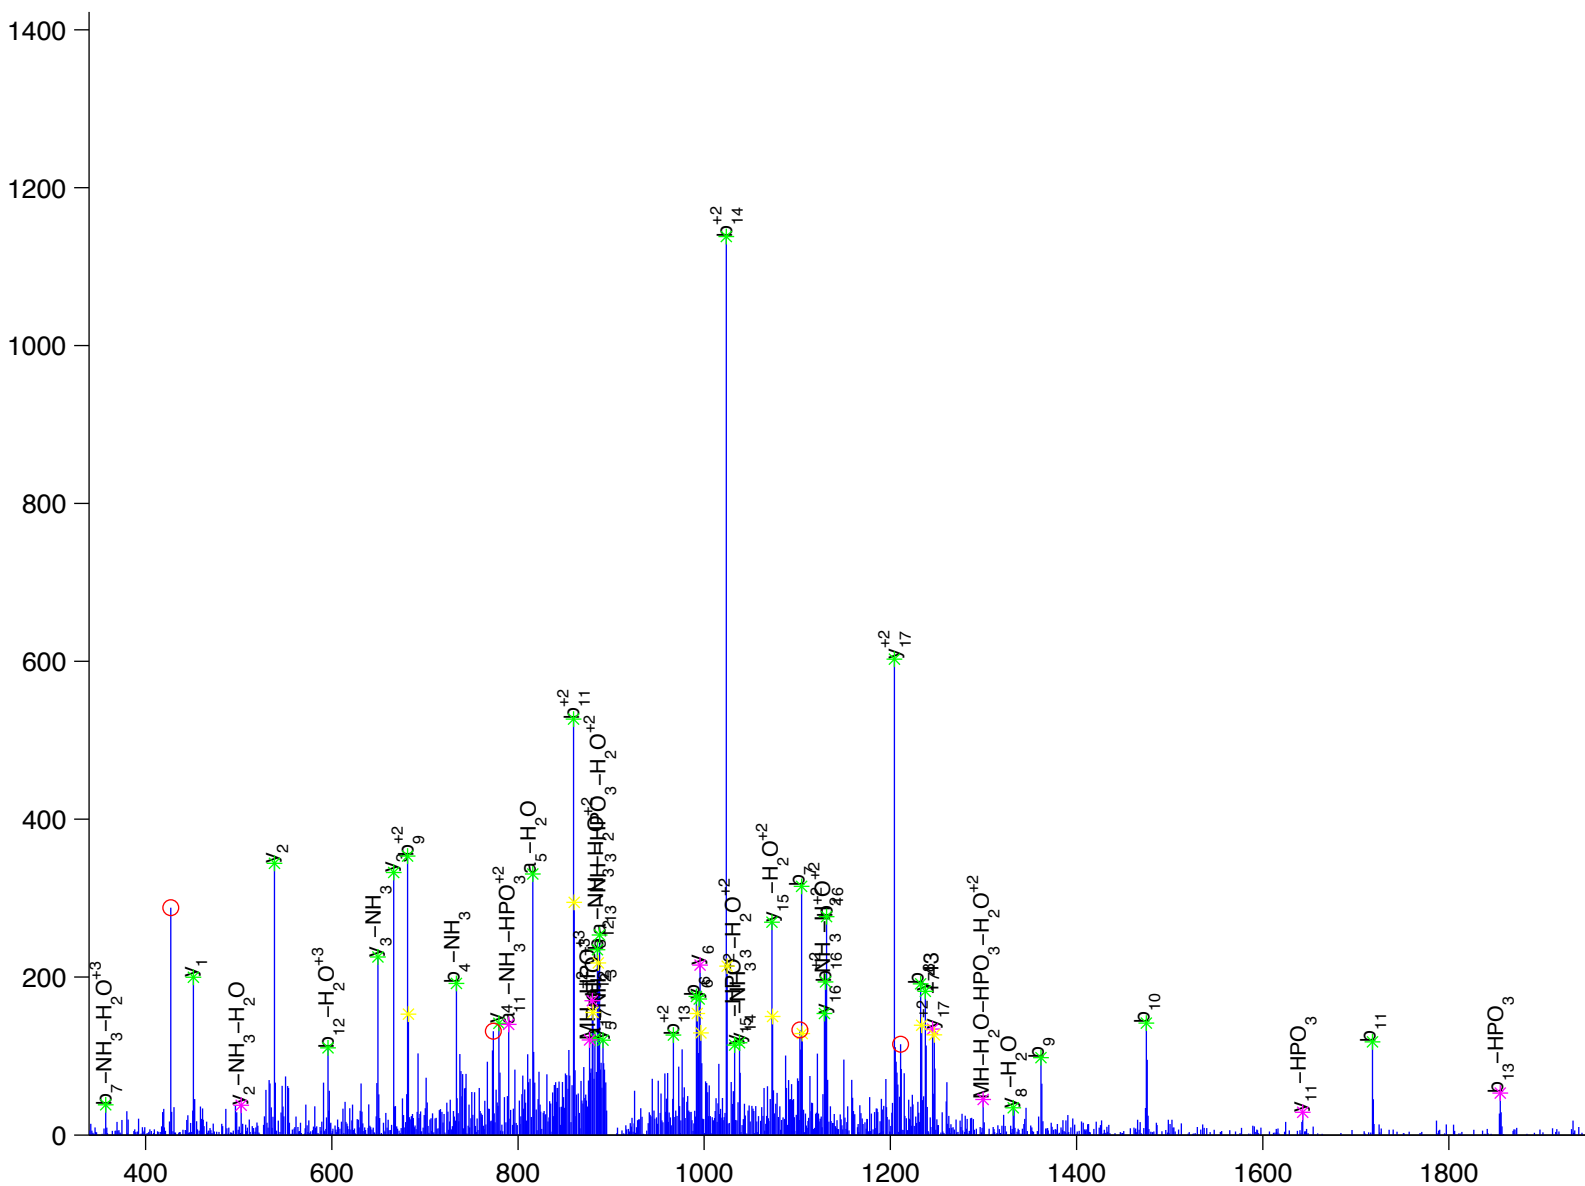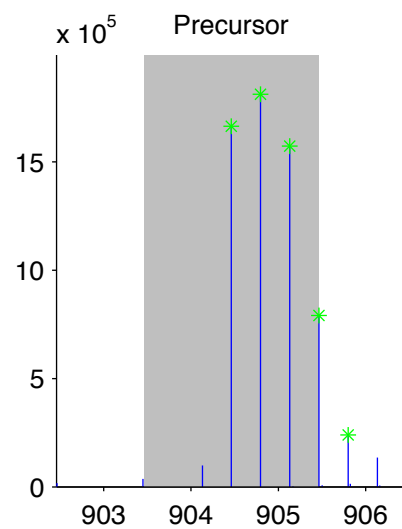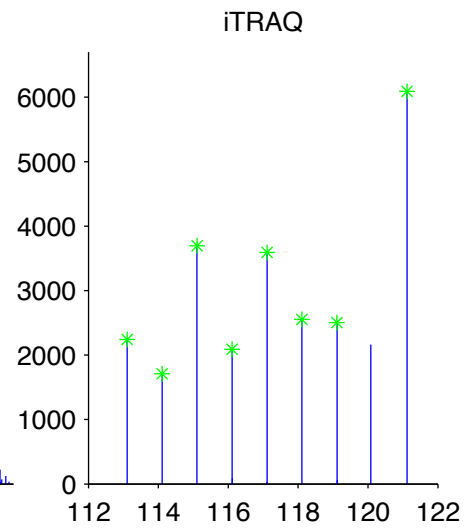

E [ D ] A [ A ] N [ N ] y [ A ] R

tubulin, alpha 4a [Homo sapiens]

Charge State: +2

Scan Number: 2466

File Name: HJ050711\_GBMxeno\_bio1\_E\_HANNAH.raw

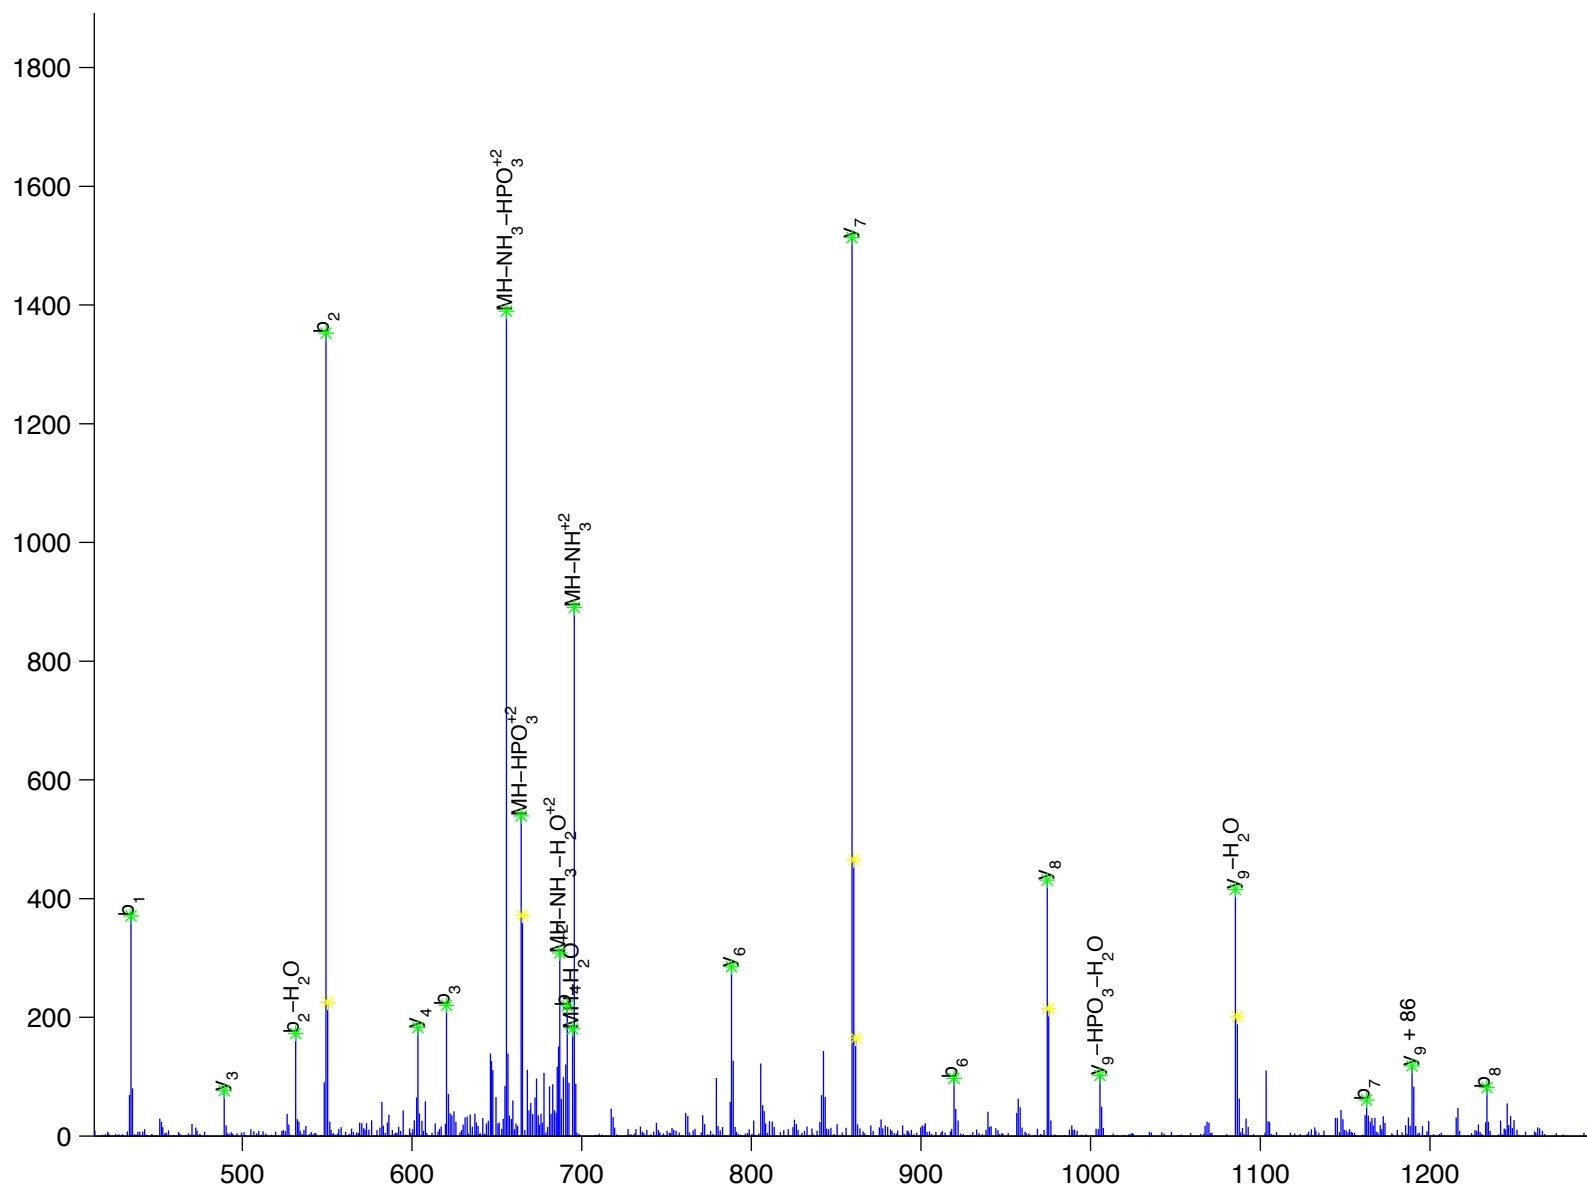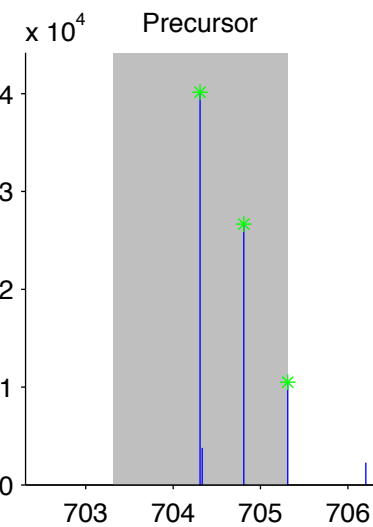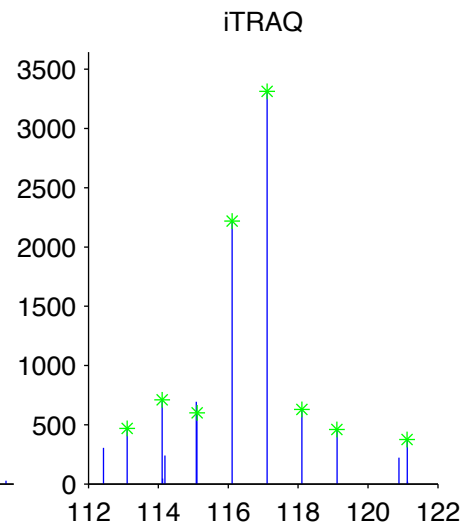

E [ D ] A [ A ] N [ N ] y [ A ] R

tubulin, alpha 4a [Homo sapiens]

Charge State: +2

Scan Number: 2510

File Name: HJ050711\_GBMxeno\_bio1\_E\_HANNAH.raw

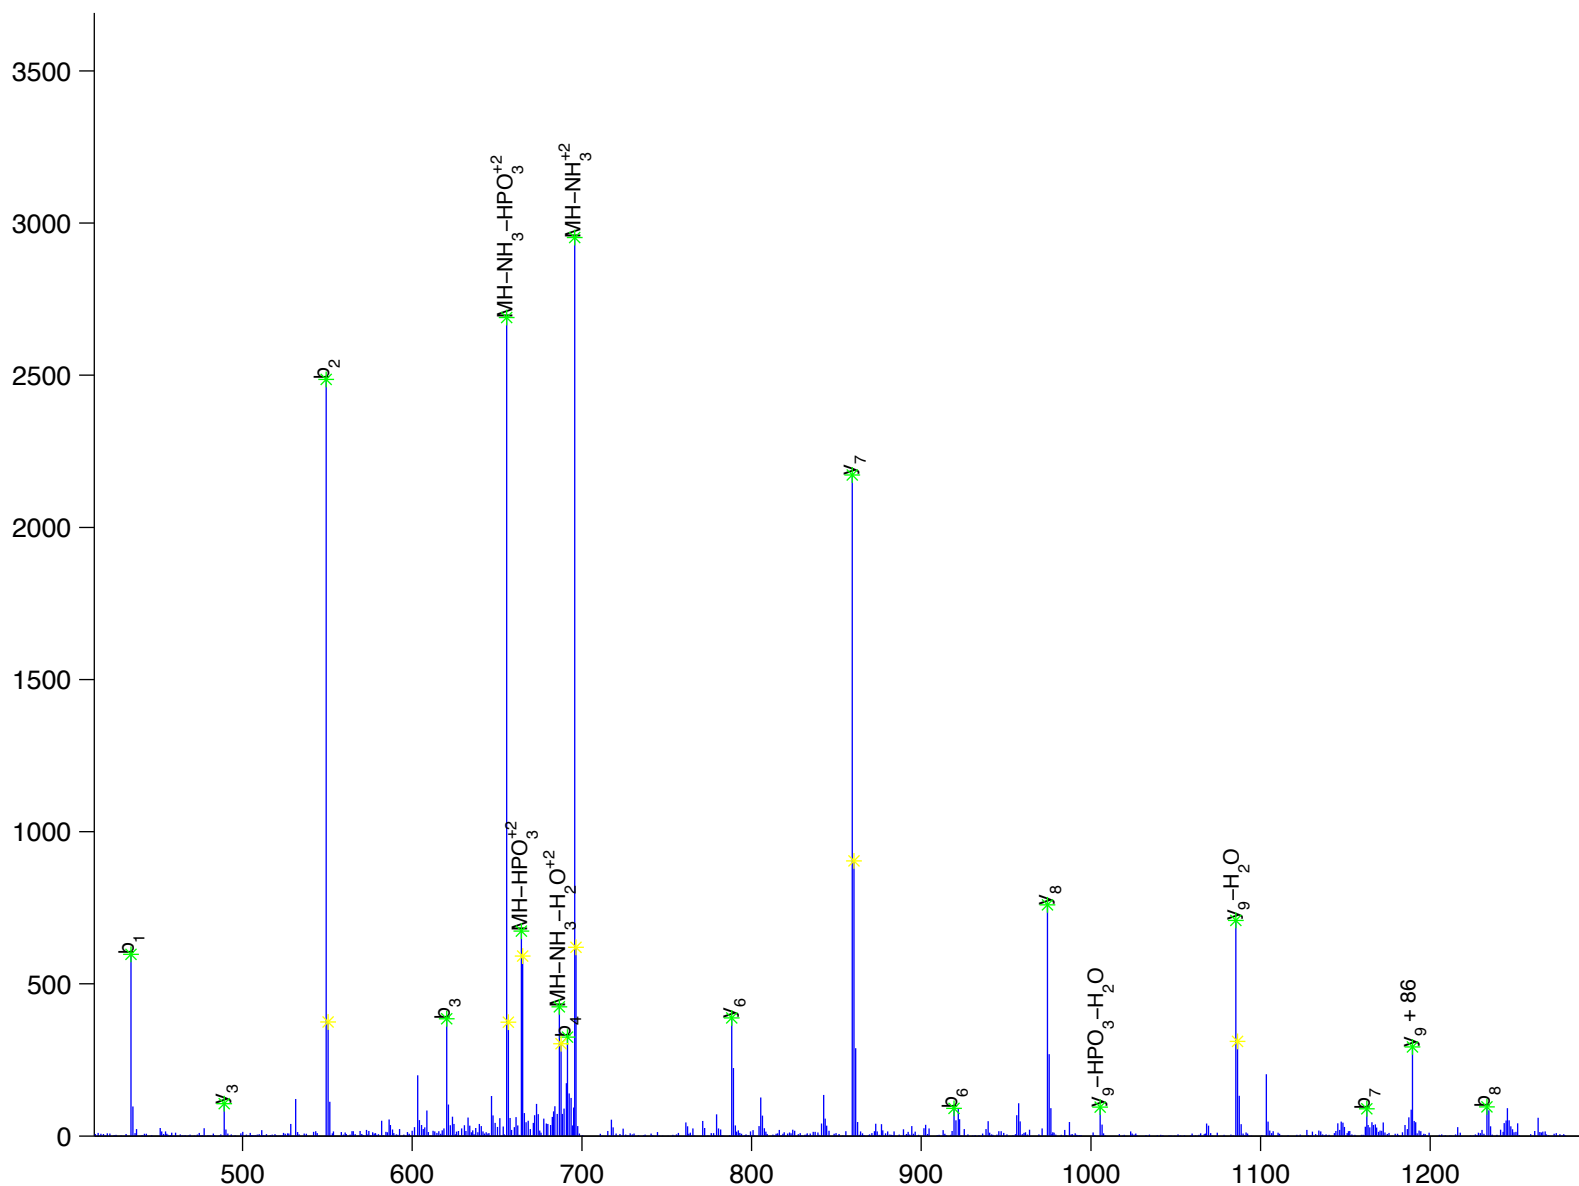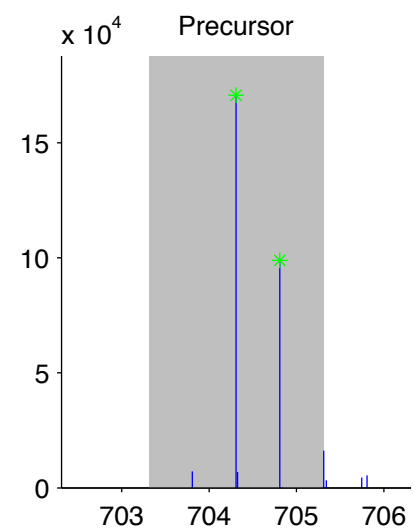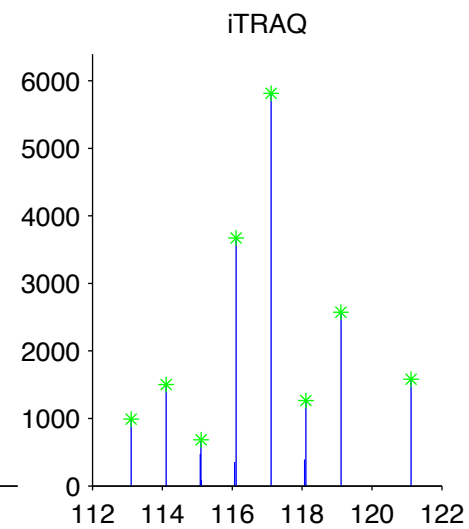

A [ y ] H [ E ] Q [ L ] S [ V ] A [ E ] I [ T ] N [ A ] c [ F ] E [ P ] A [ N ] Q [ M ] V [ K ]

tubulin, alpha 4a [Homo sapiens]

Charge State: +3

Scan Number: 7920

File Name: HJ050711\_GBMxeno\_bio1\_E\_HANNAH.raw

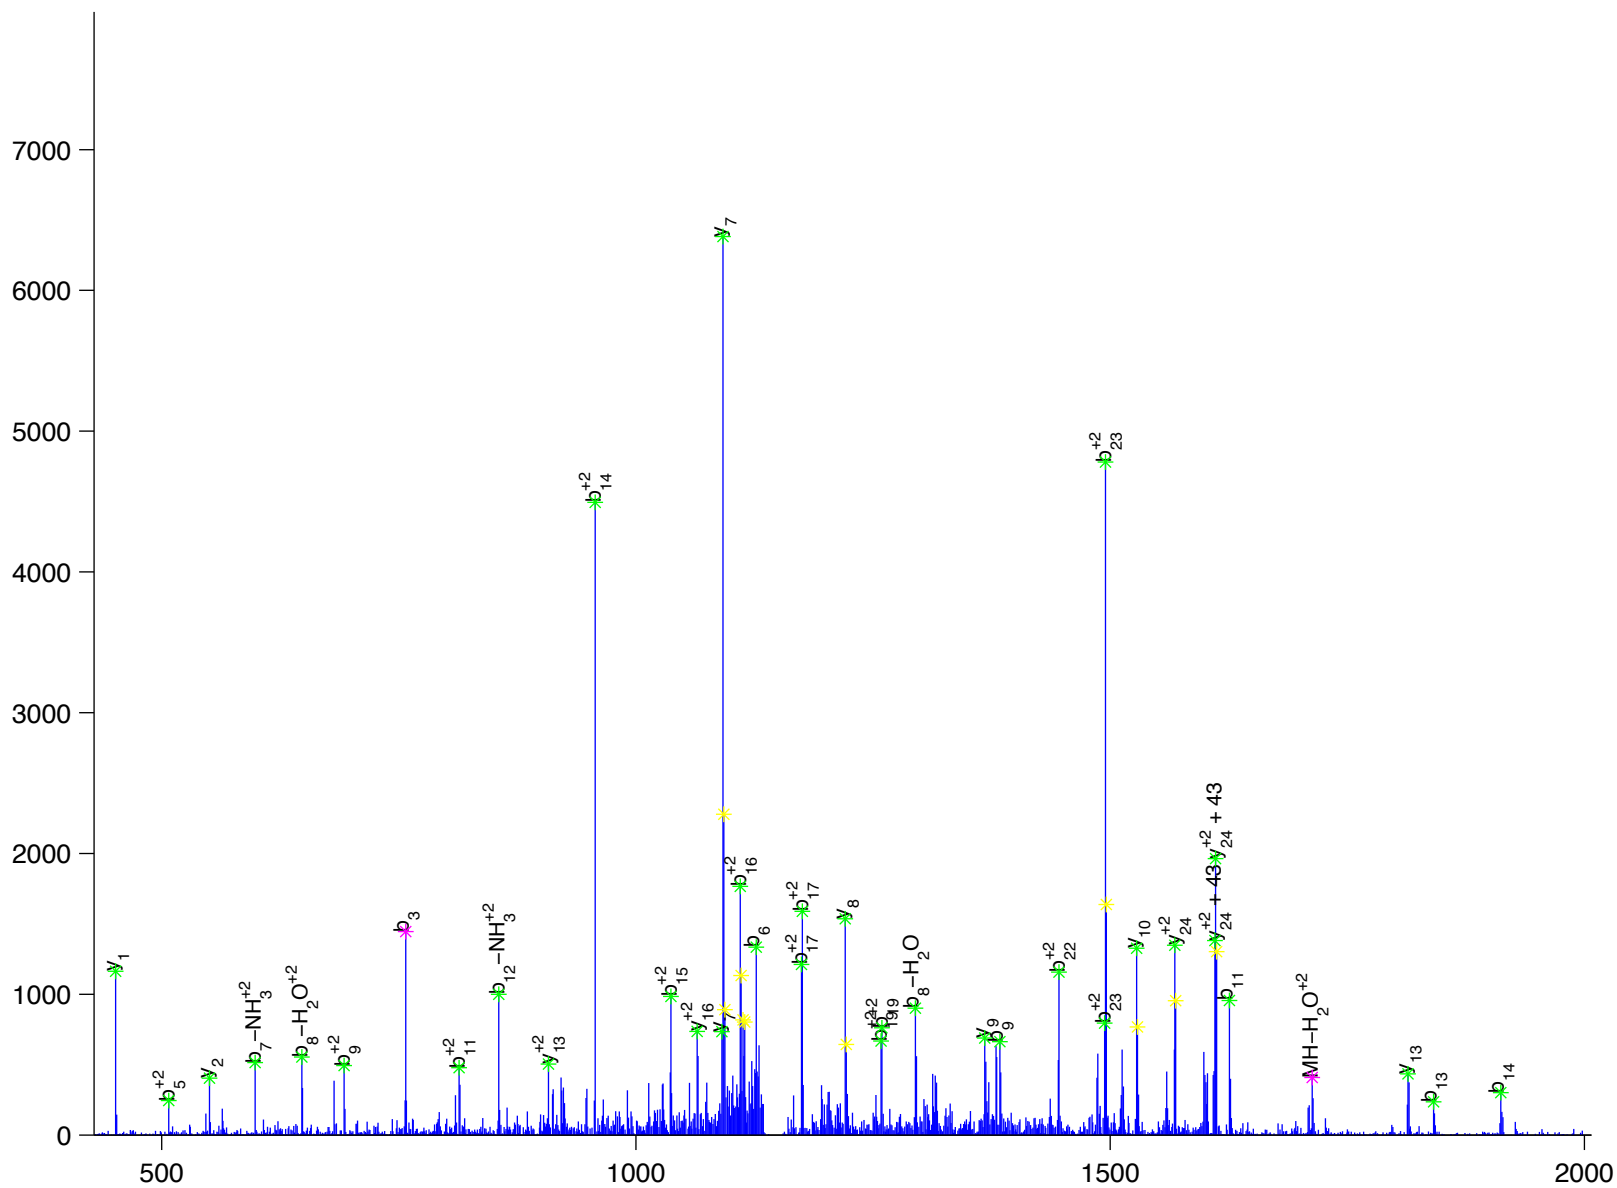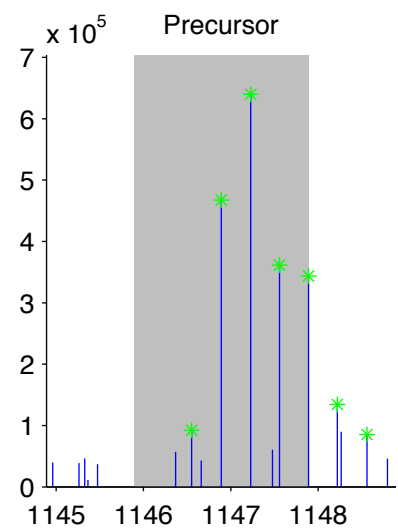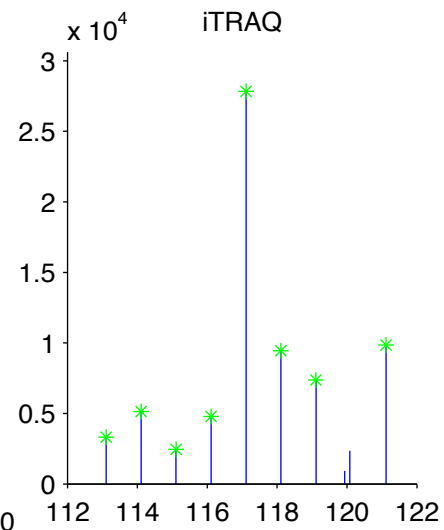

N[S]S[y]F[V]E[W]I[P]N[N]V]K

tubulin, beta 2 [Homo sapiens]

Charge State: +3

Scan Number: 8949

File Name: HJ050711\_GBMxeno\_bio1\_E\_HANNAH.raw

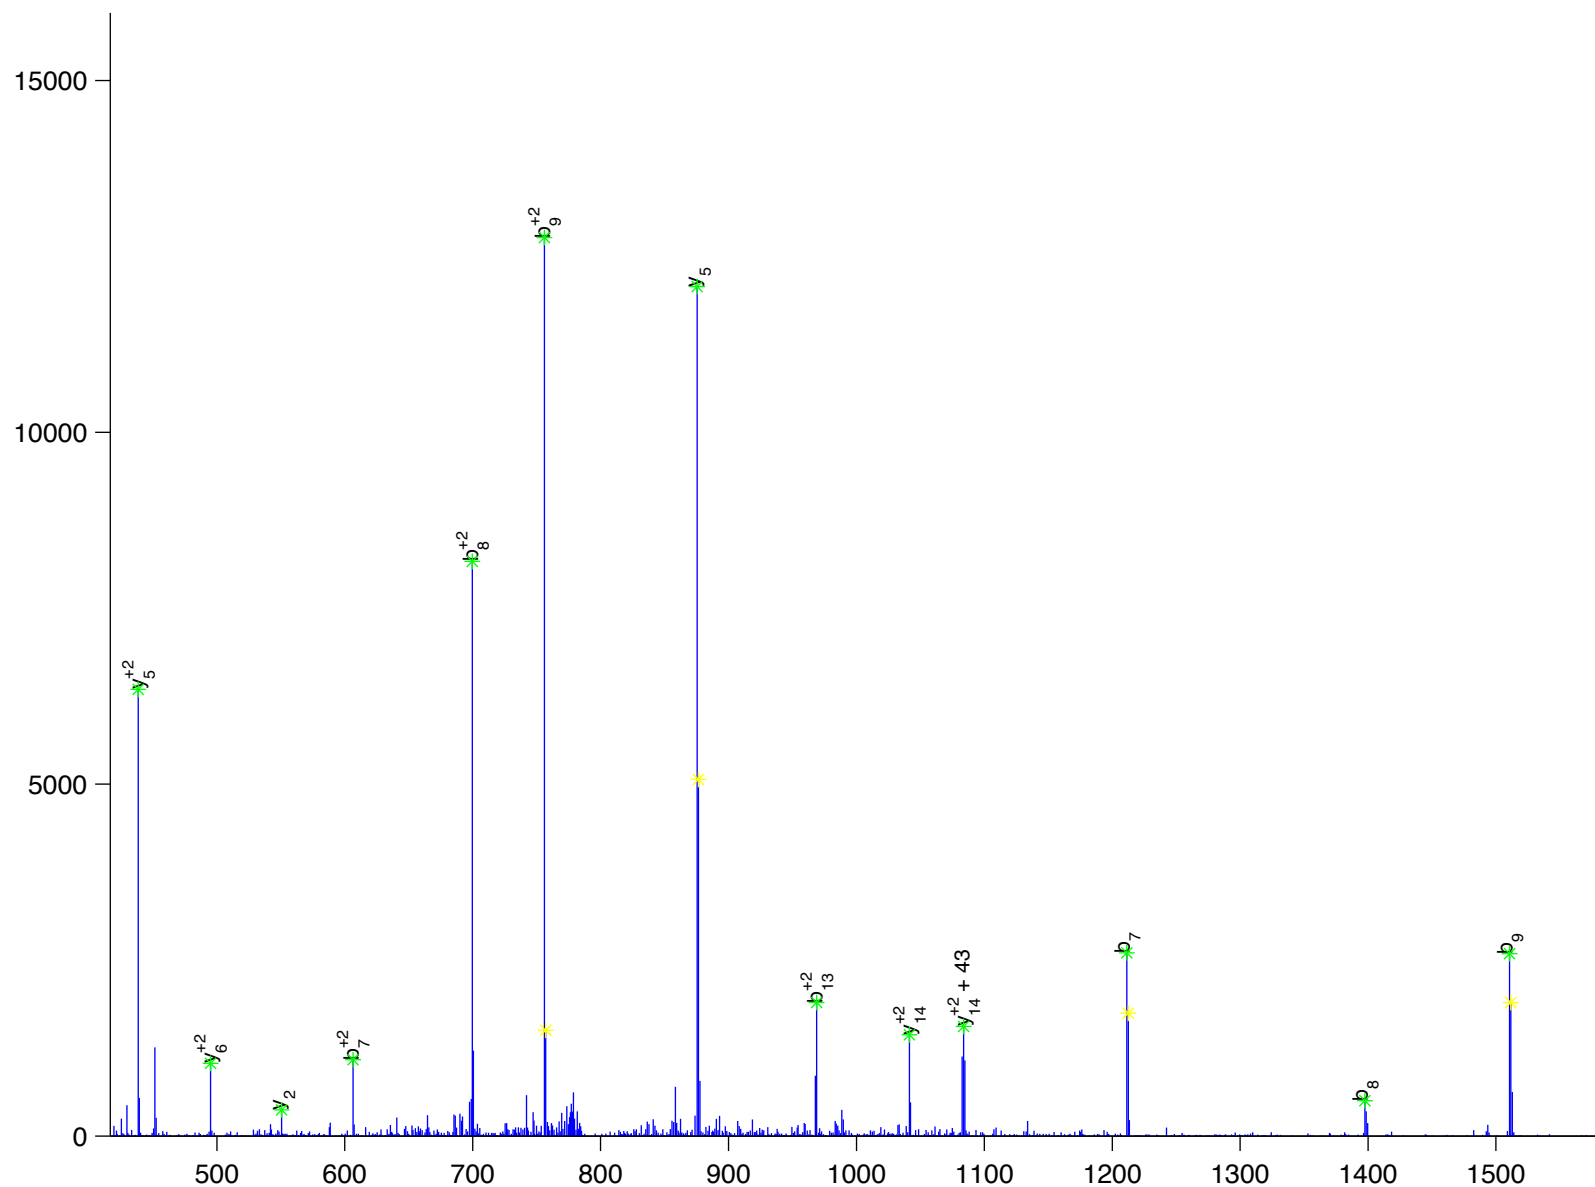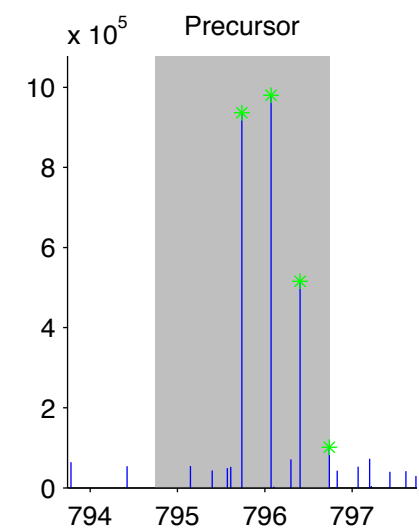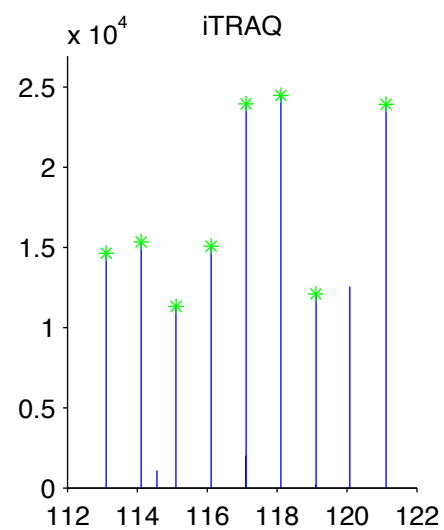



L L A Q A E G E P c y I R

tyrosine kinase 2 [Homo sapiens]

Charge State: +3

Scan Number: 7905

File Name: HJ050711\_GBMxeno\_bio1\_E\_HANNAH.raw

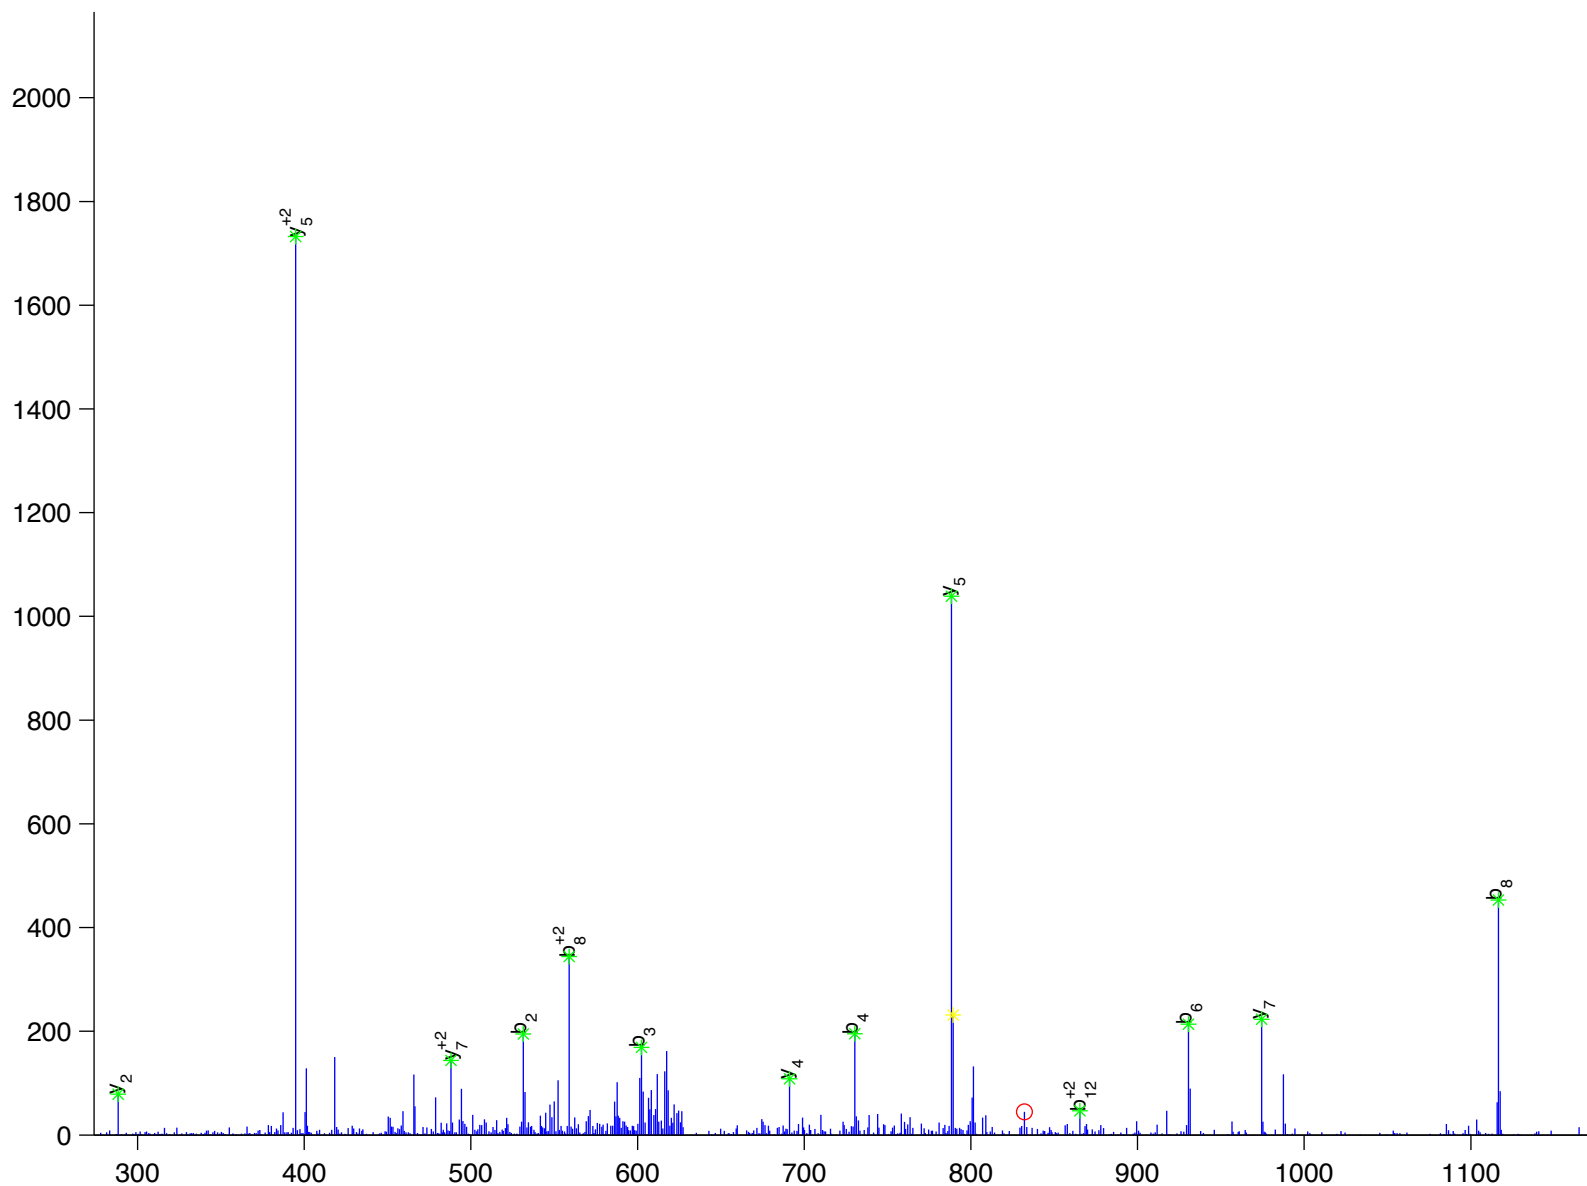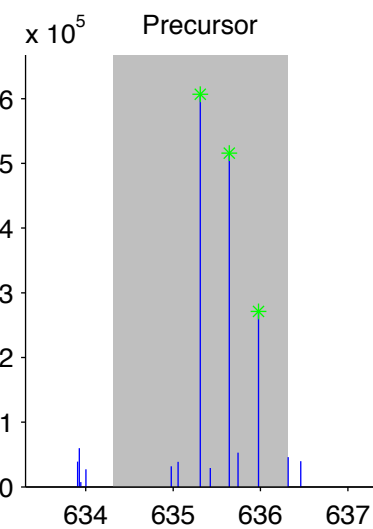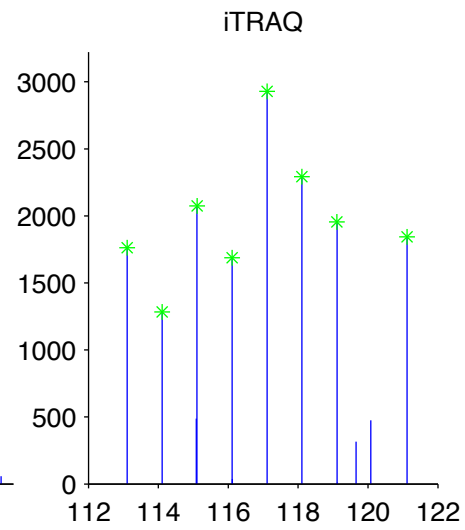



E [ E ] L [ y ] S [ K ]

ubiquitin associated and SH3 domain containing, B [Homo sapiens]

Charge State: +3

Scan Number: 4037

File Name: HJ050711\_GBMxeno\_bio1\_E\_HANNAH.raw

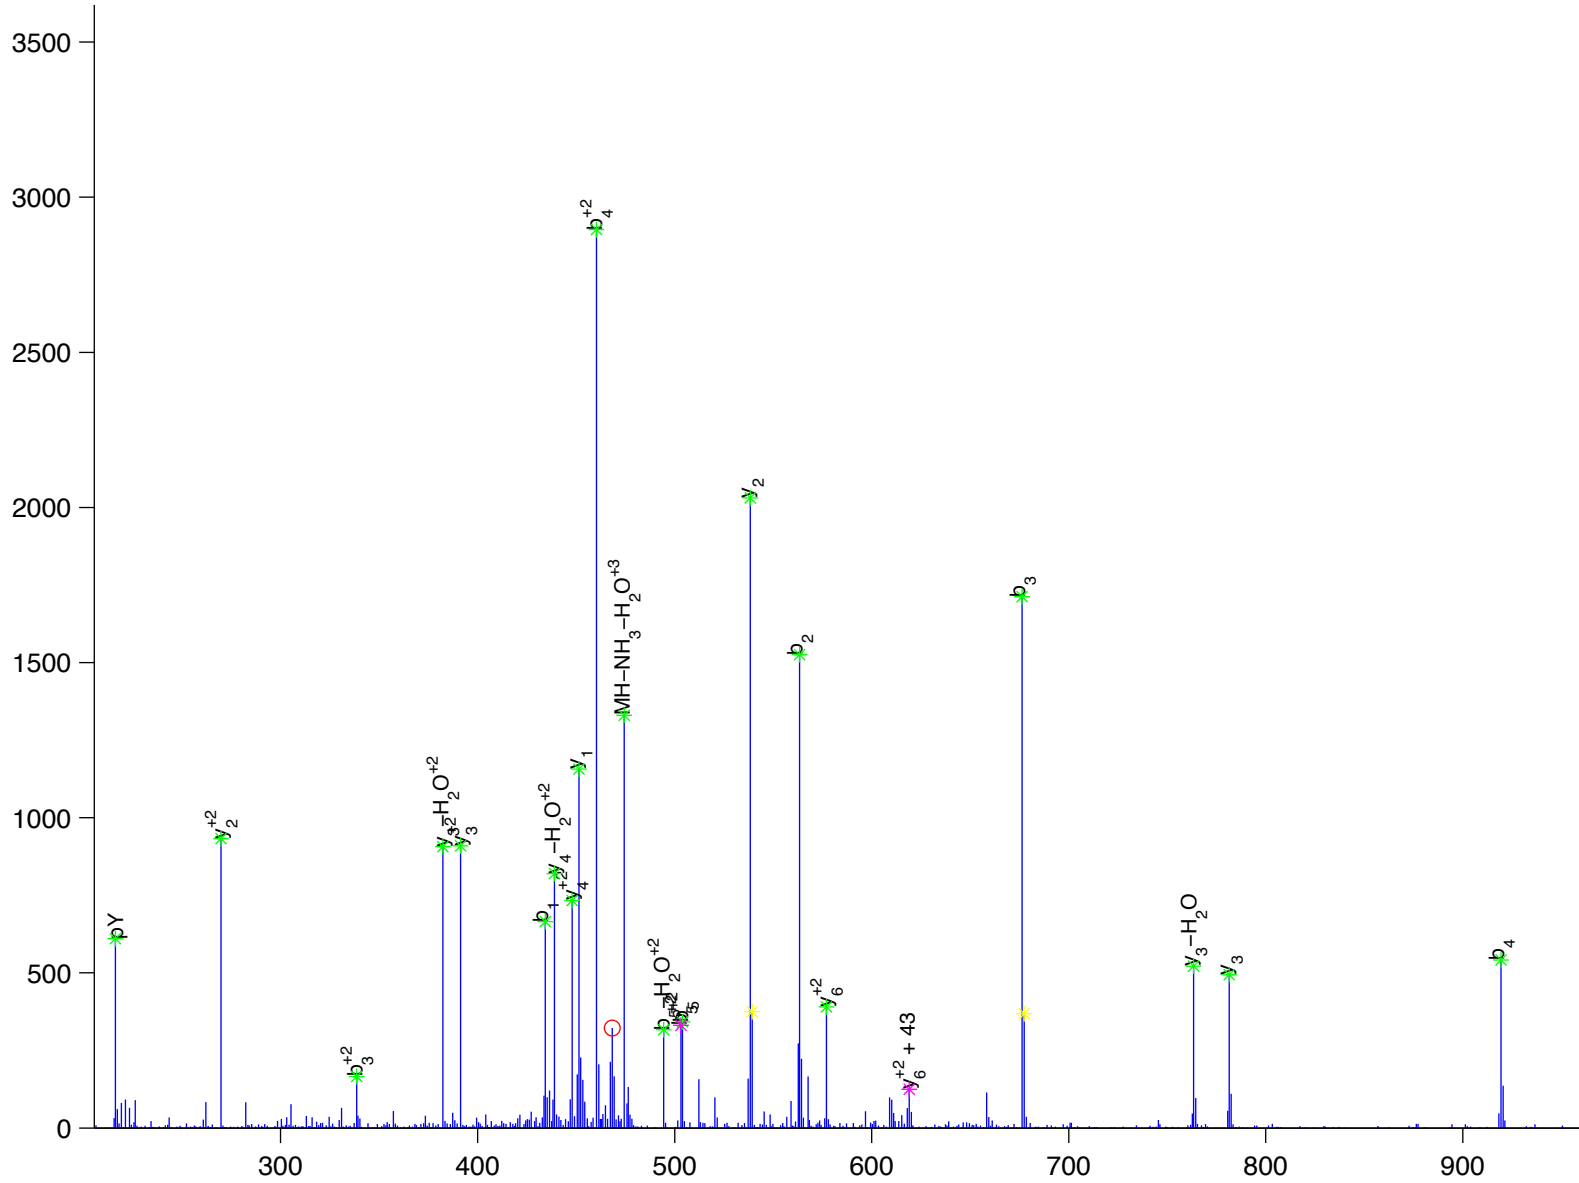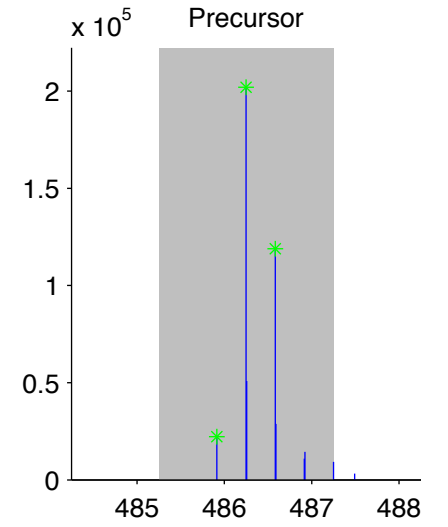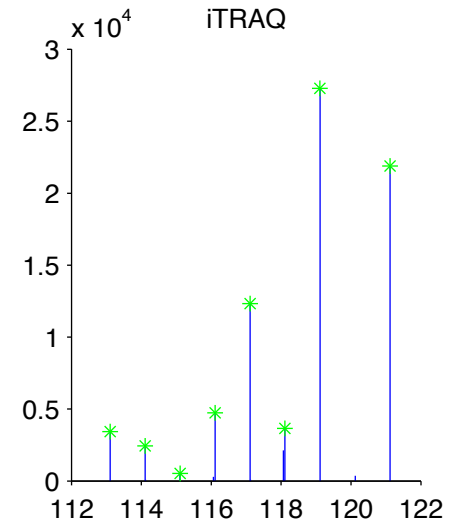

E [ E ] L [ y ] S [ K ]

ubiquitin associated and SH3 domain containing, B [Homo sapiens]

Charge State: +3

Scan Number: 4211

File Name: HJ050711\_GBMxeno\_bio1\_E\_HANNAH.raw

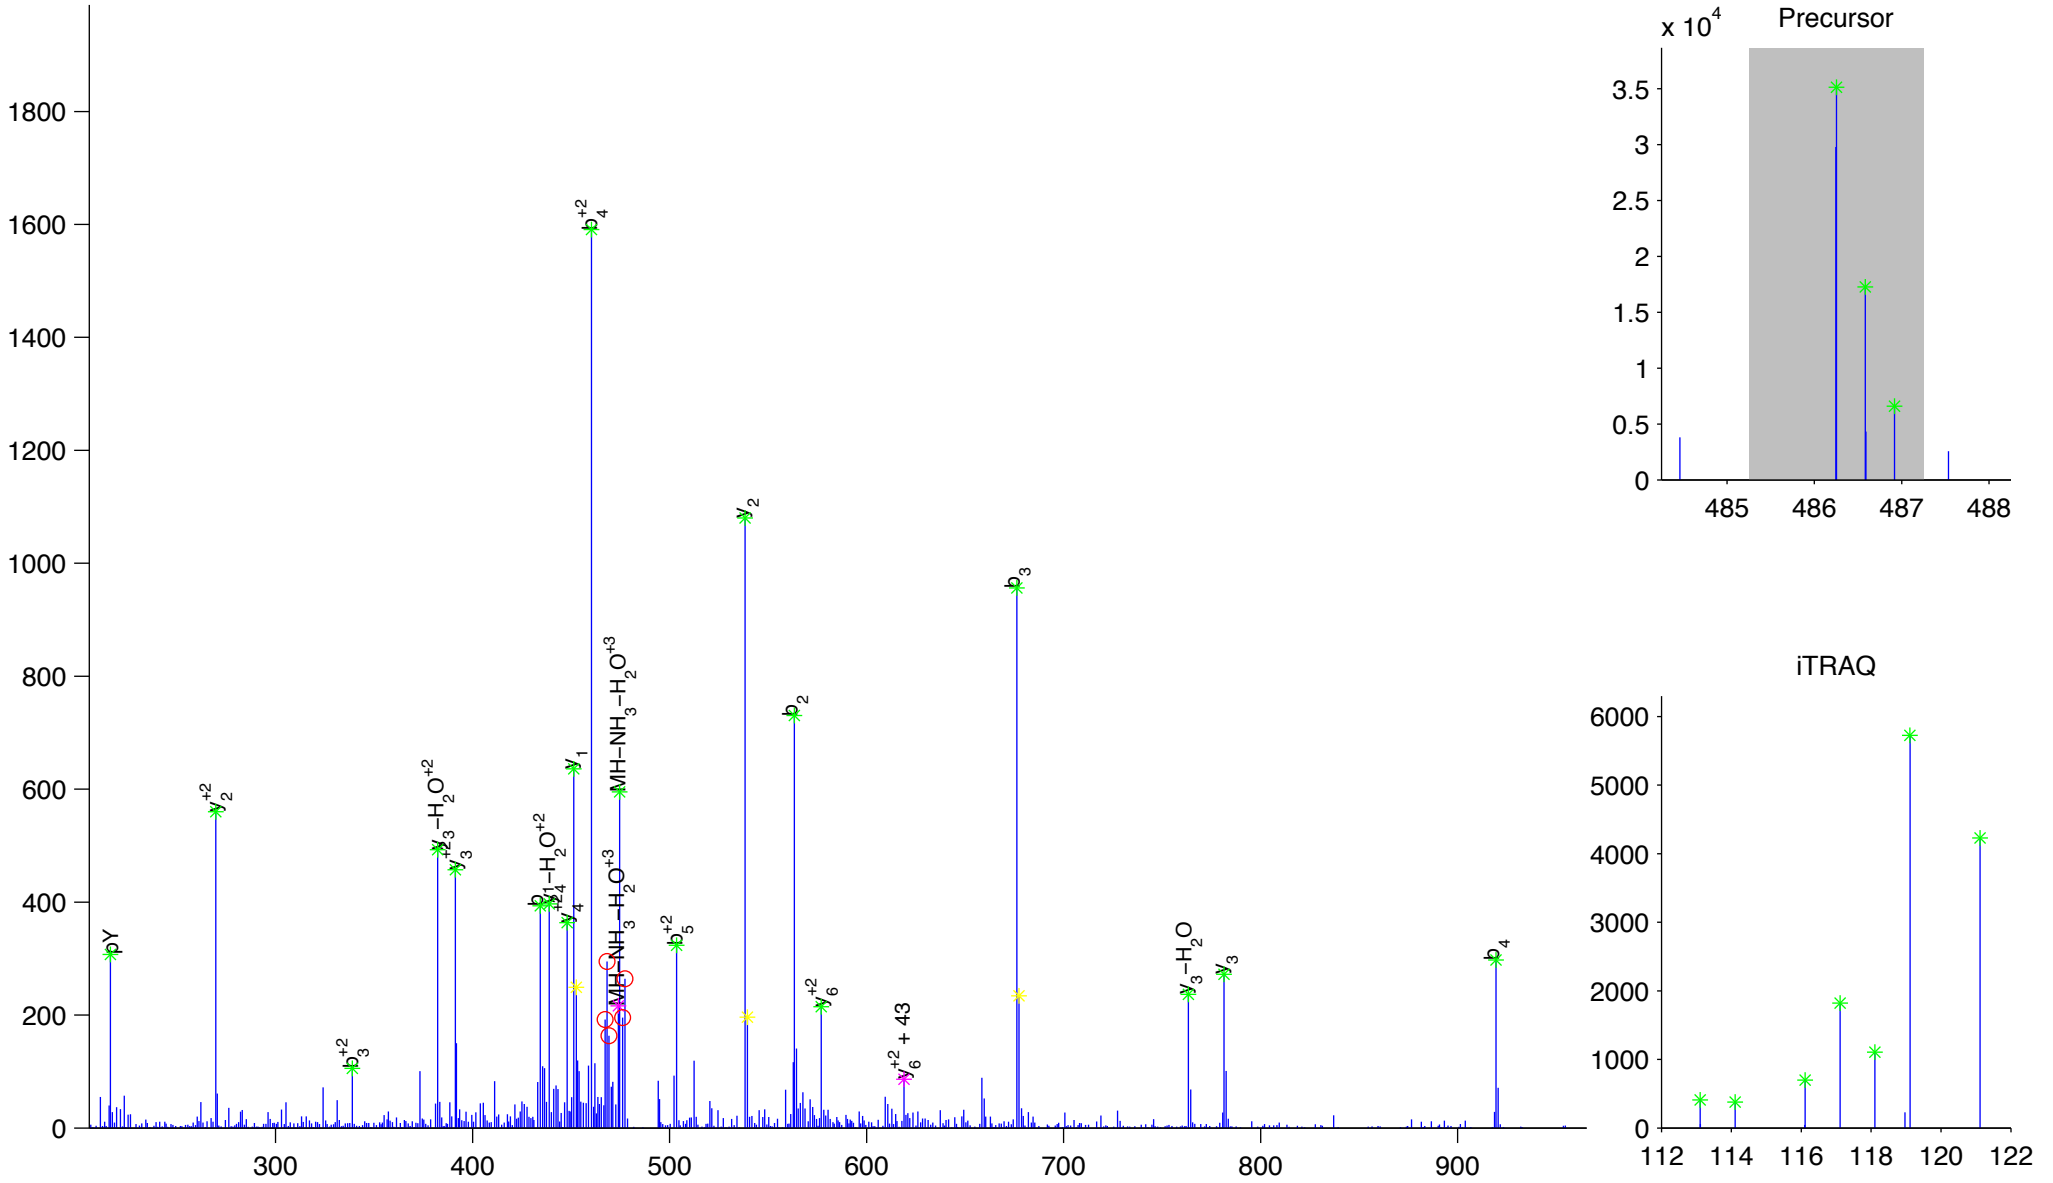

A
Q
E
N
y
E
G
S
E
E
V
S
P
P
Q
T
K

ubiquitin specific protease 9, X-linked isoform 3 [Homo sapiens]

Charge State: +3

Scan Number: 4192

File Name: HJ050711\_GBMxeno\_bio1\_E\_HANNAH.raw

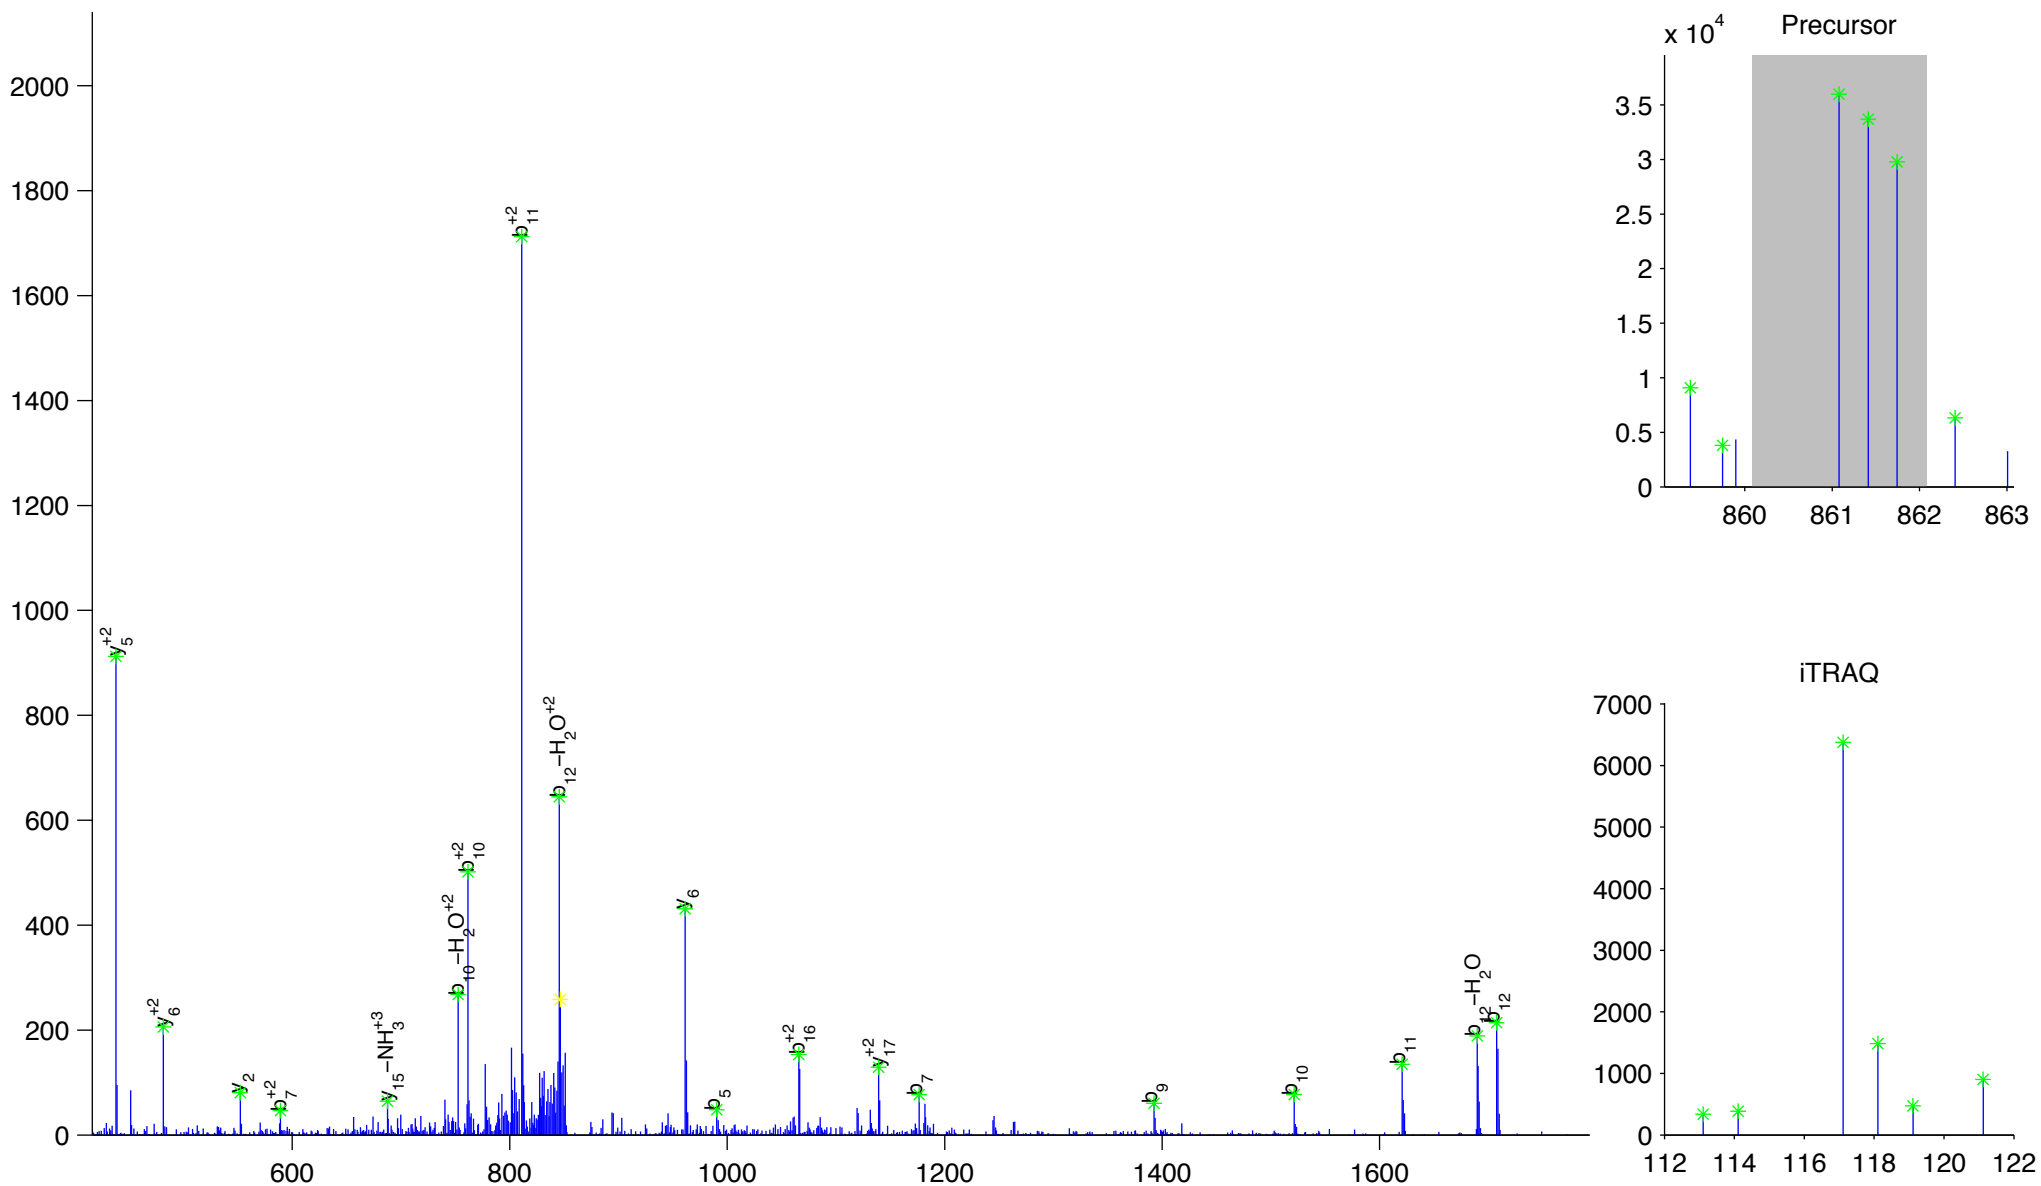

L[N]W[L]S[V]D[F]N[N]W[K]D[W]E[D]D[s]D[E]D[M]S[N]F[D]R

inactive progesterone receptor, 23 kD [Homo sapiens]

Charge State: +4

Scan Number: 10110

File Name: HJ050711\_GBMxeno\_bio1\_E\_HANNAH.raw

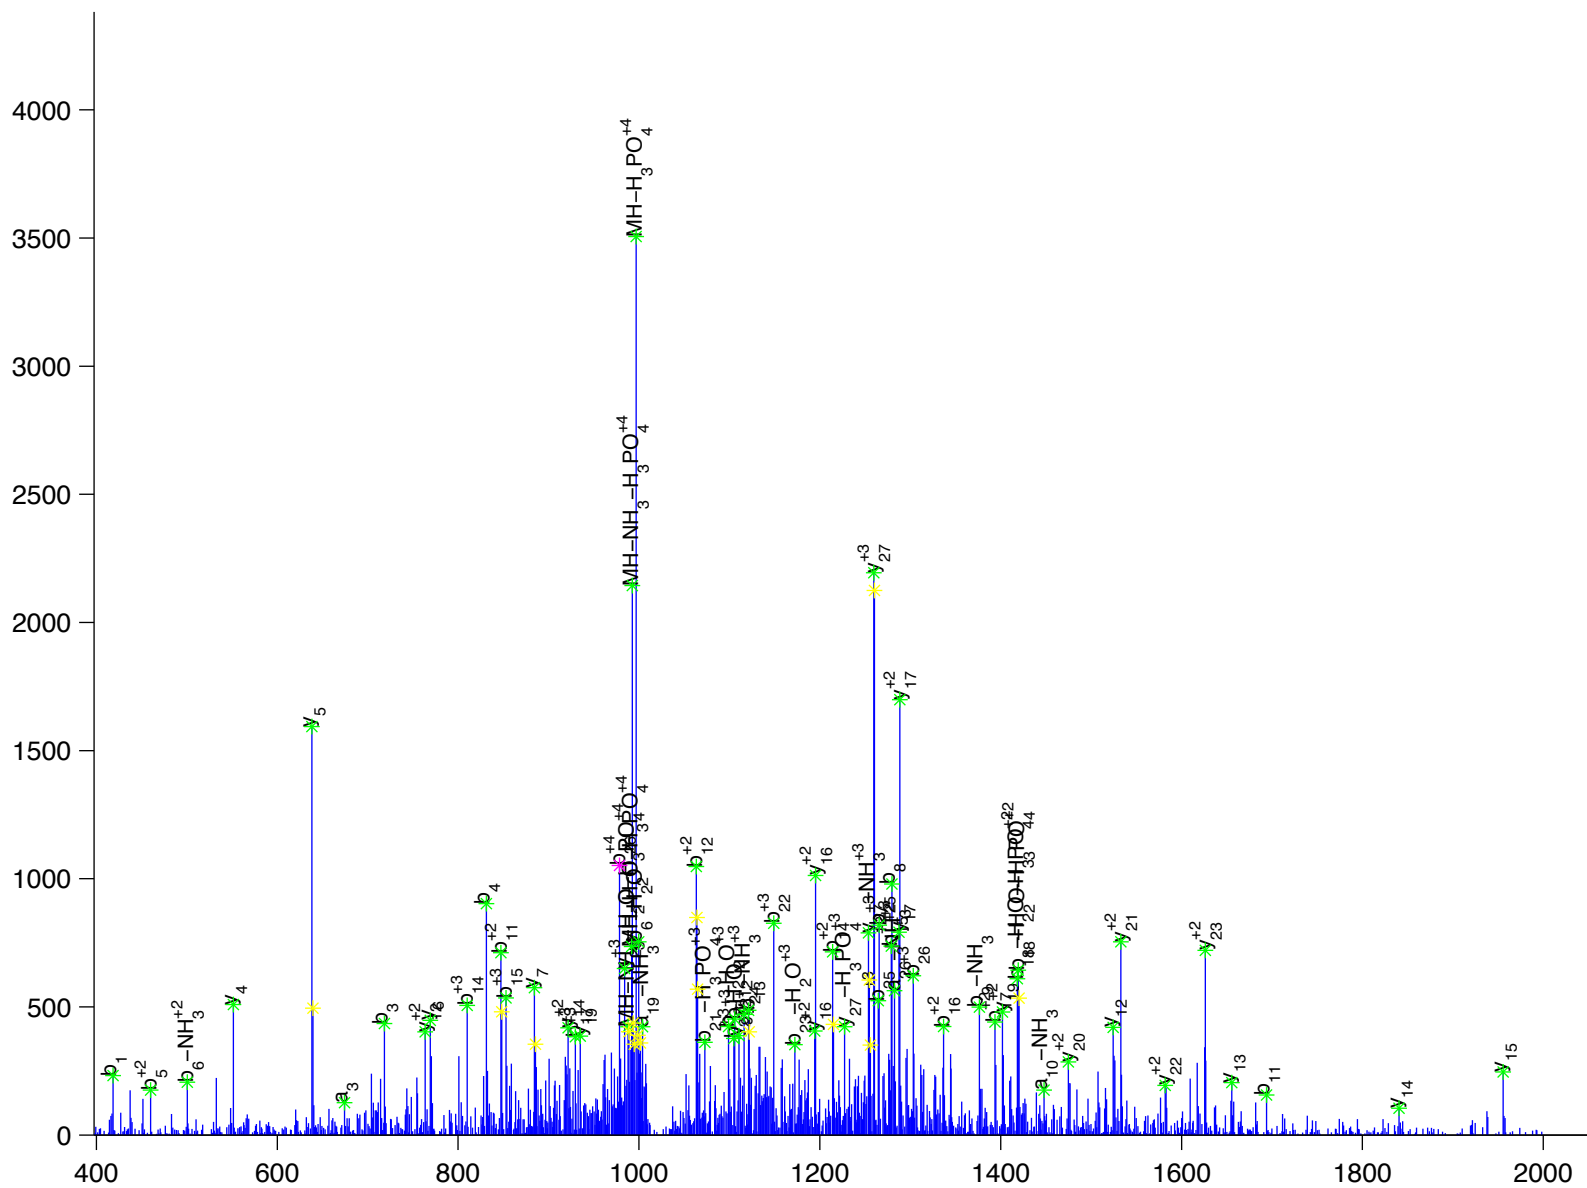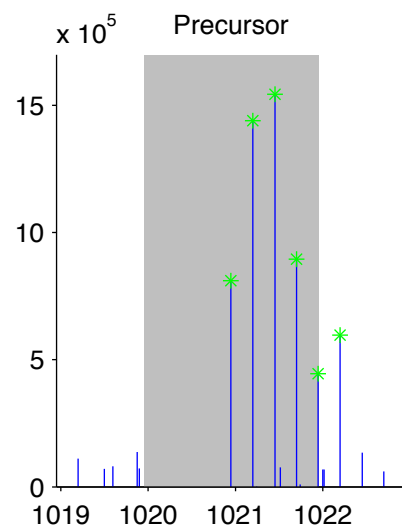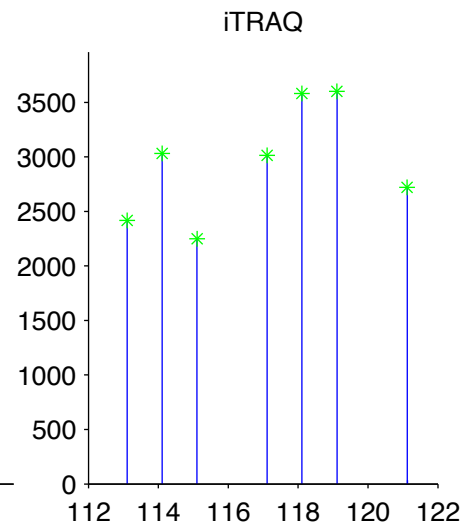

L [ M ] [ T ] [ G ] [ D ] [ T ] y [ T ] [ A ] [ H ] [ A ] [ G ] [ A ] K

v-abl Abelson murine leukemia viral oncogene homolog 2 isoform b [Homo sapiens]

Charge State: +3

Scan Number: 4791

File Name: HJ050711\_GBMxeno\_bio1\_E\_HANNAH.raw

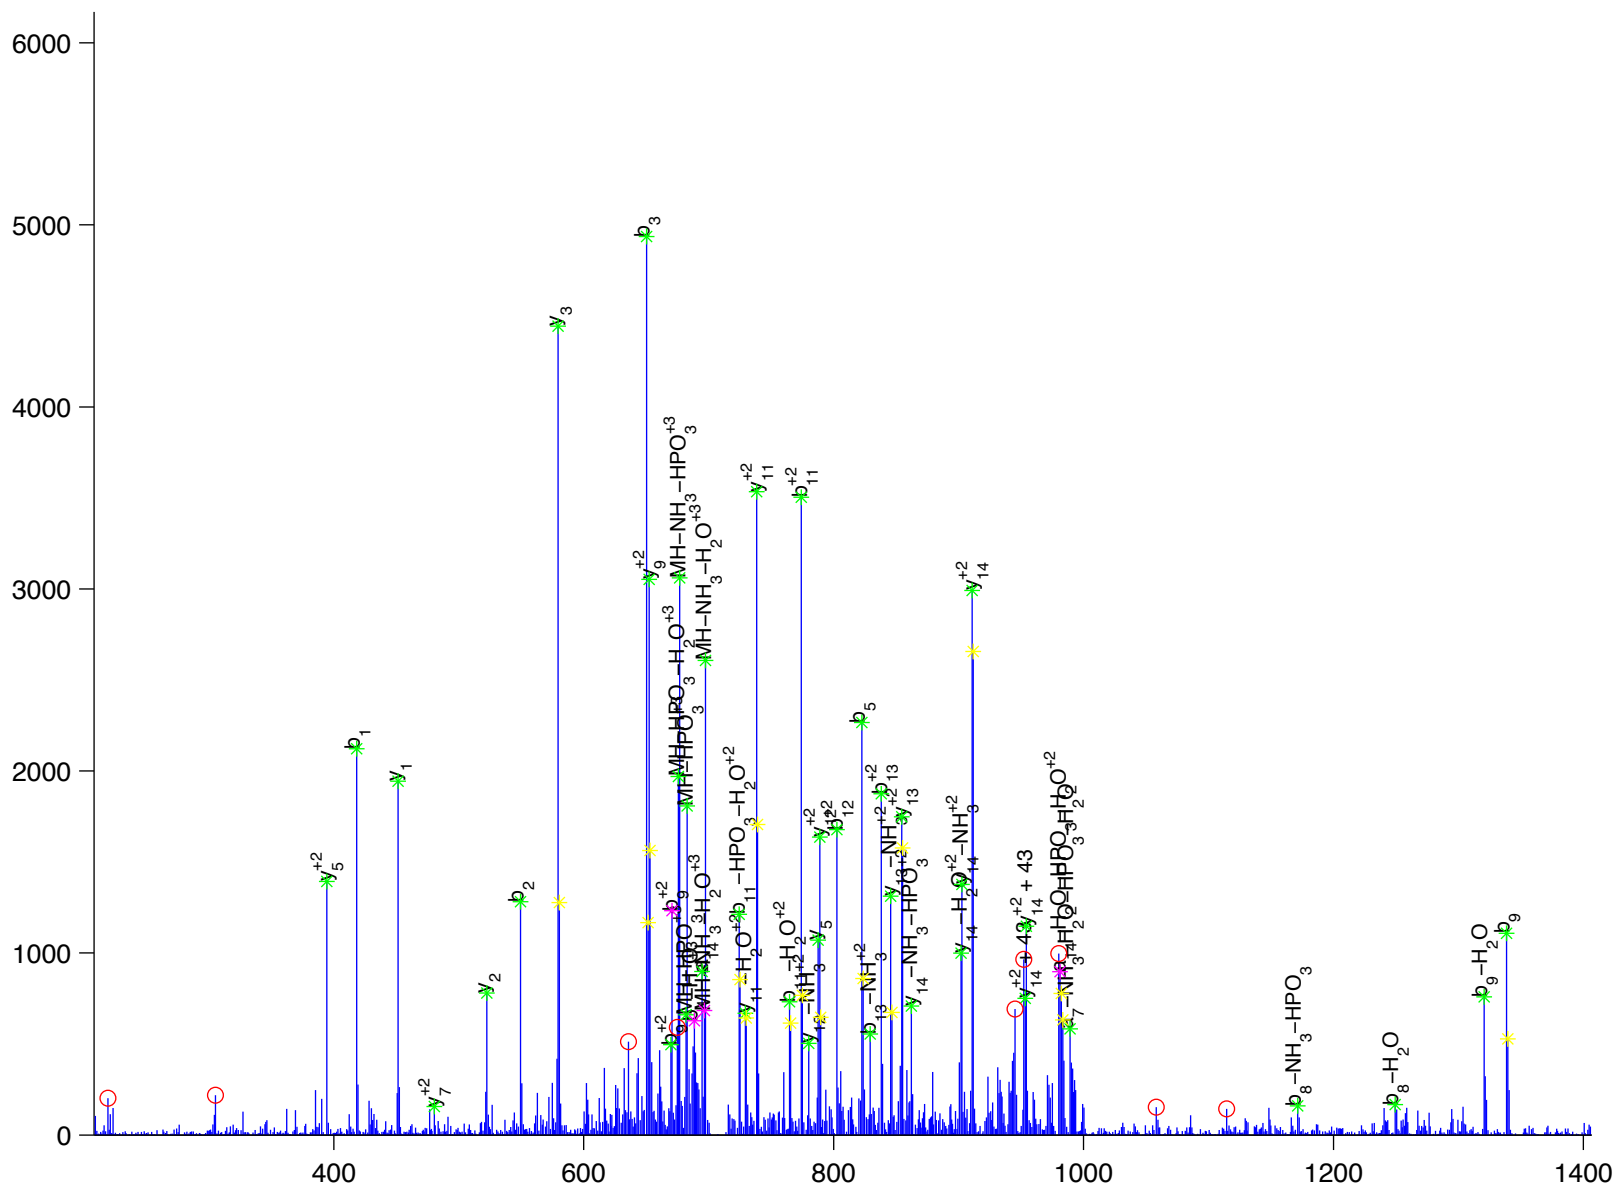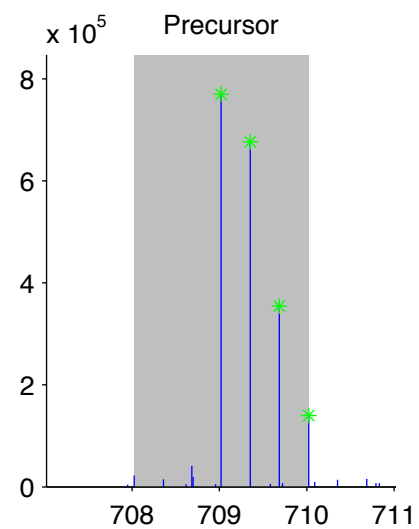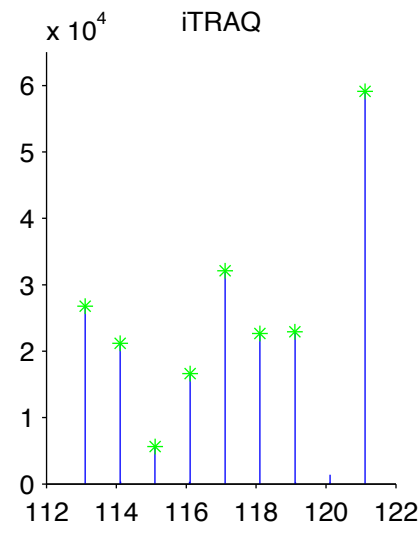

Q [ E ] E [ A ] E [ y ] V [ R ]

v-crK sarcoma virus CT10 oncogene homolog isoform b [Homo sapiens]

Charge State: +2

Scan Number: 3363

File Name: HJ050711\_GBMxeno\_bio1\_E\_HANNAH.raw

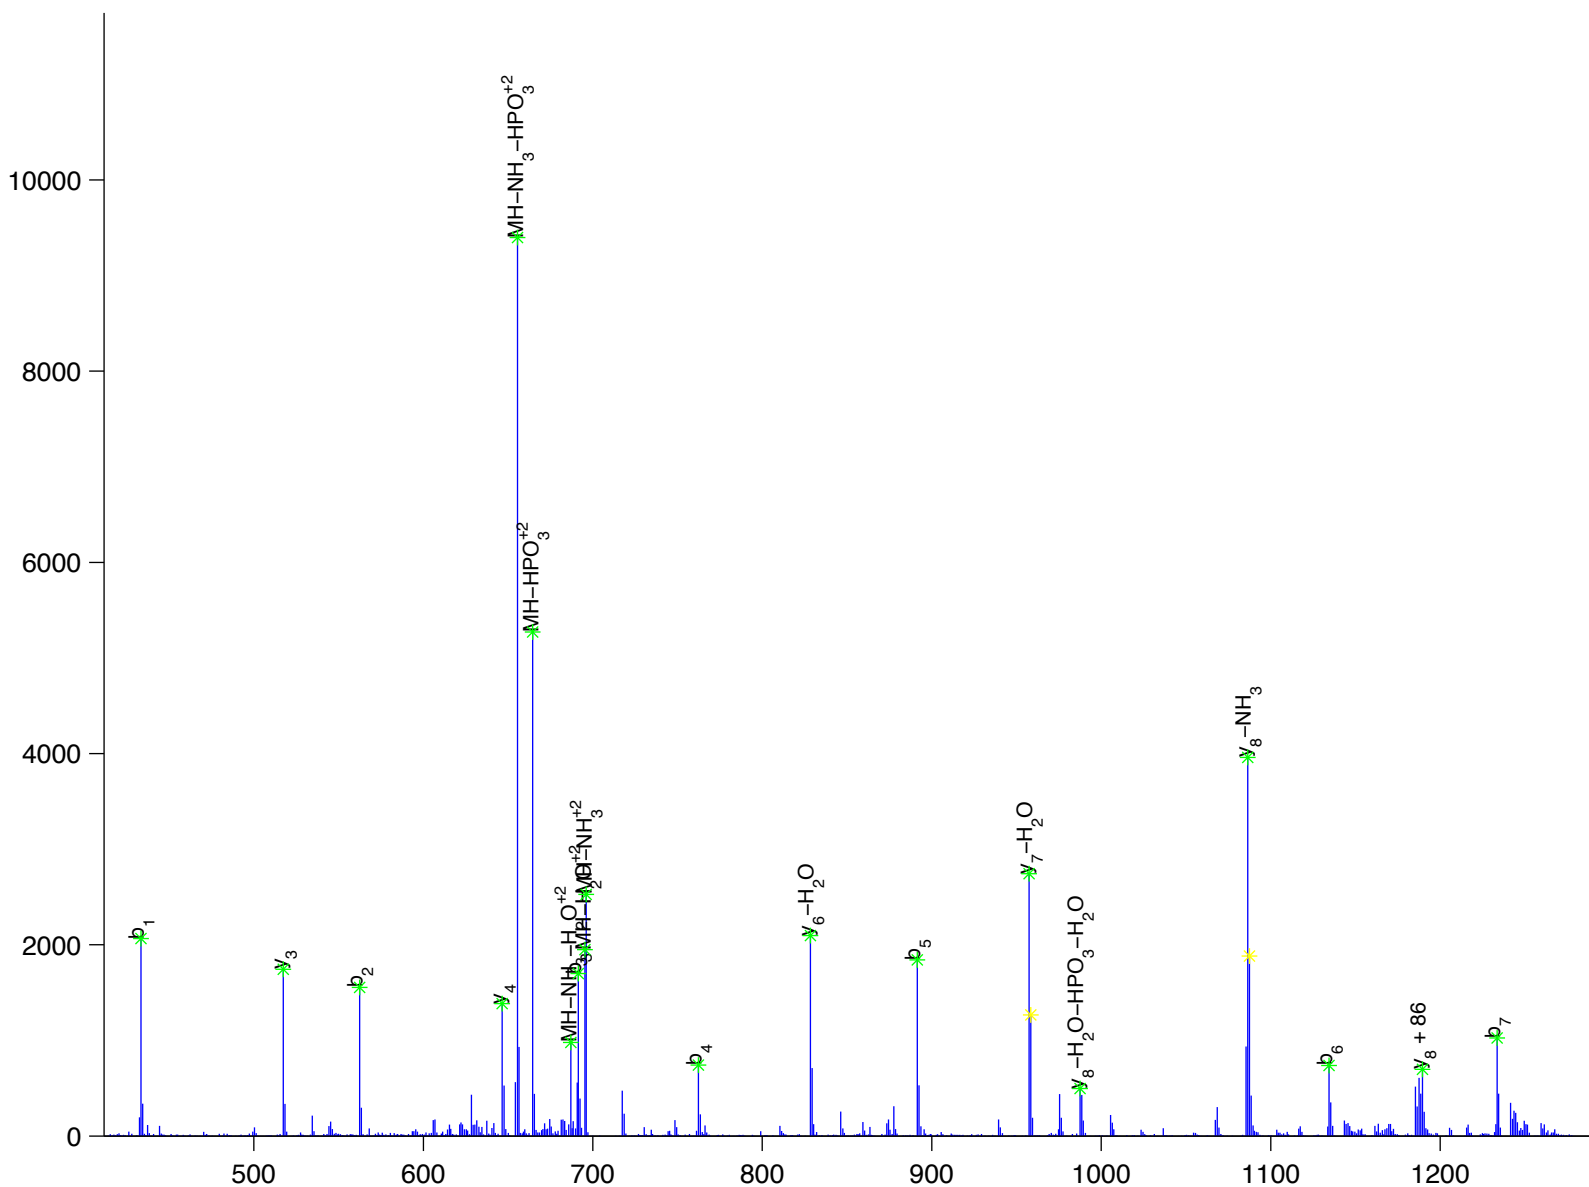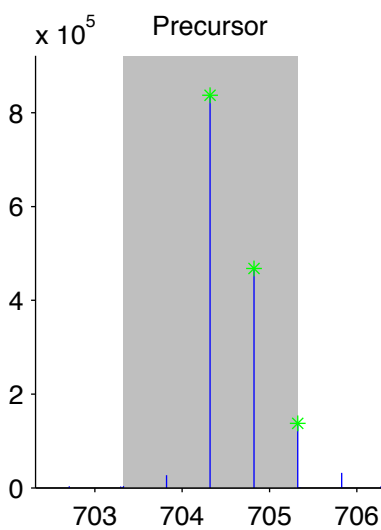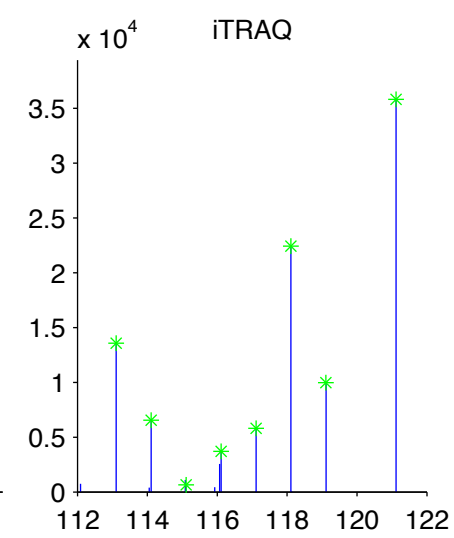



Q [ E ] E [ A ] E [ y ] V [ R ]  
 [ [ [ [ [ [ [ [ [ [ [ ] ] ] ] ] ] ] ] ] ] ] ]

v-crk sarcoma virus CT10 oncogene homolog isoform b [Homo sapiens]

Charge State: +2

Scan Number: 3367

File Name: HJ050711\_GBMxeno\_bio1\_E\_HANNAH.raw

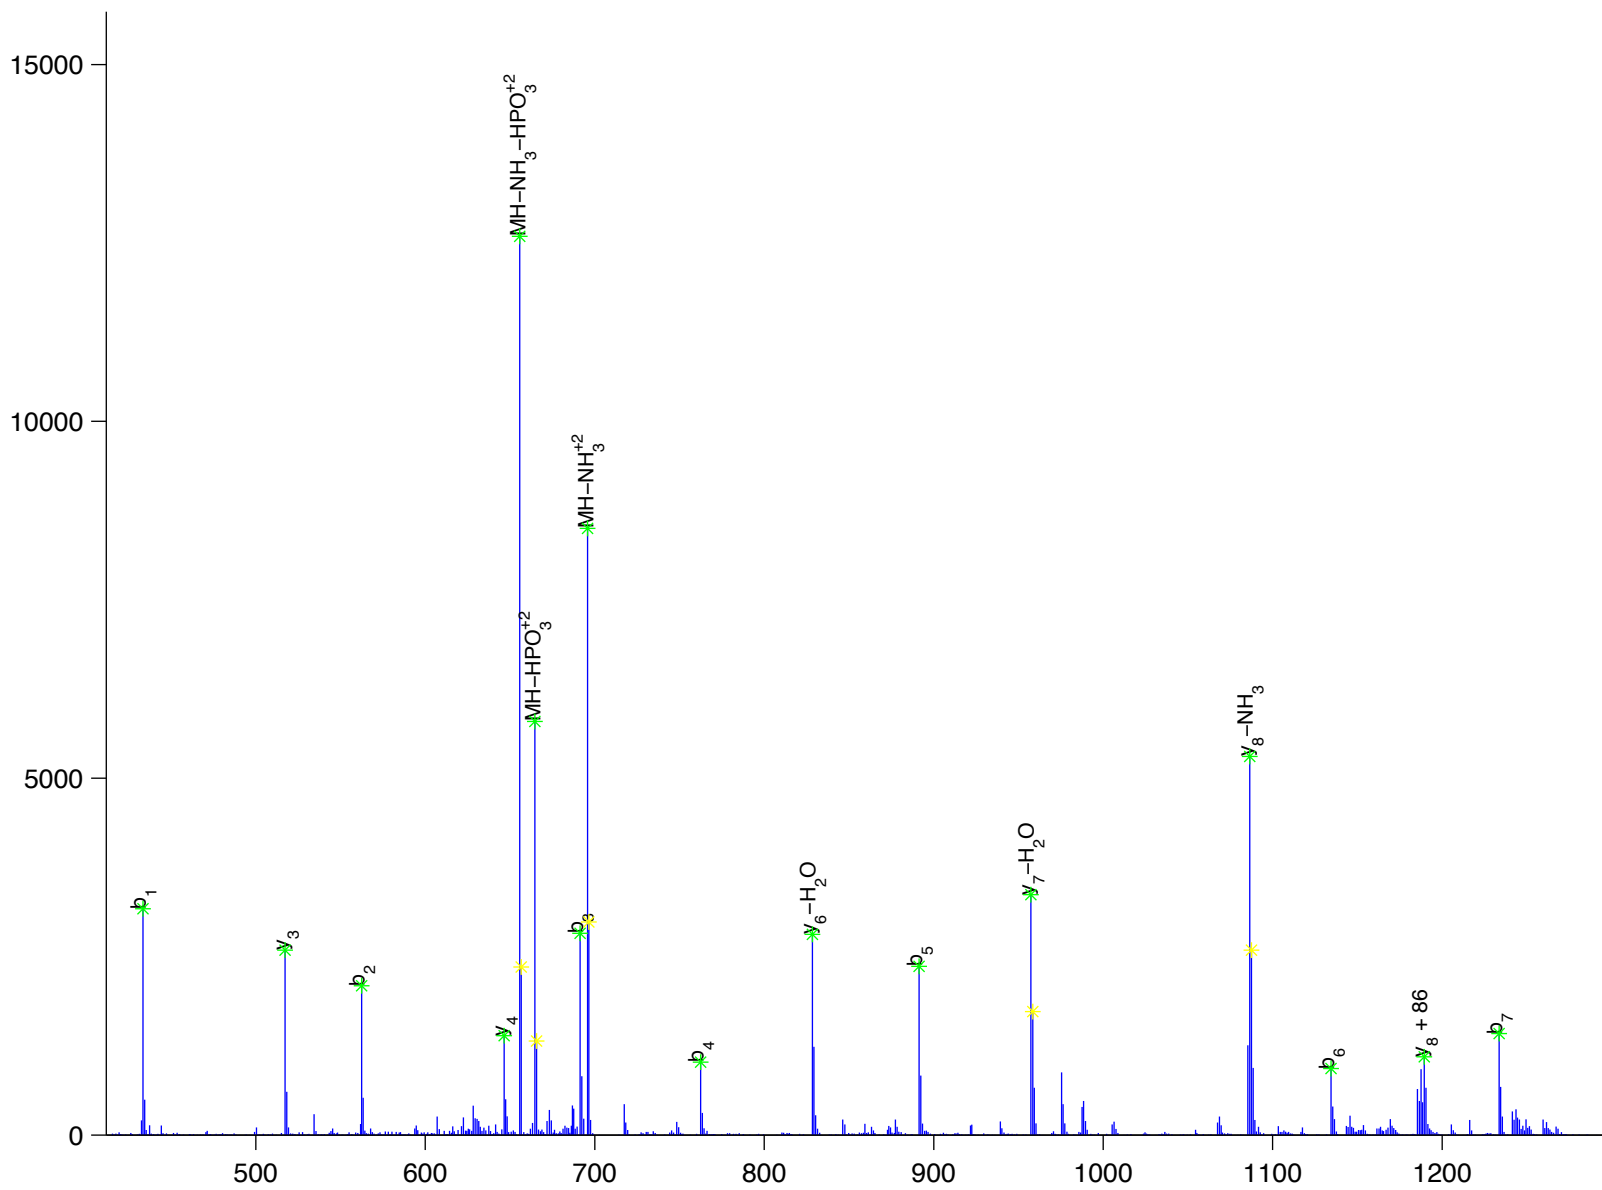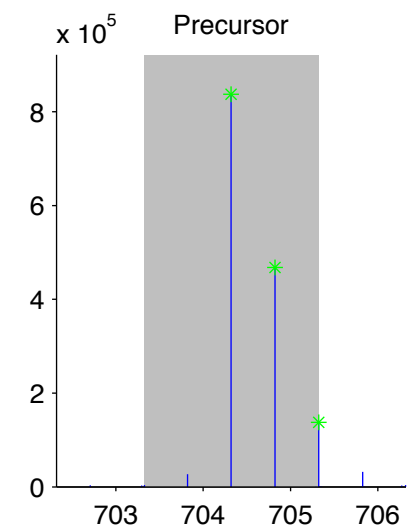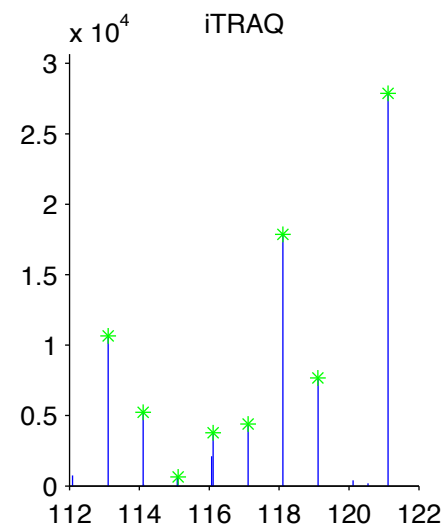

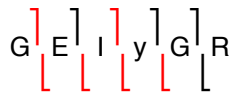

vav 1 guanine nucleotide exchange factor [Homo sapiens]

Charge State: +2

Scan Number: 2985

File Name: HJ050711\_GBMxeno\_bio1\_E\_HANNAH.raw

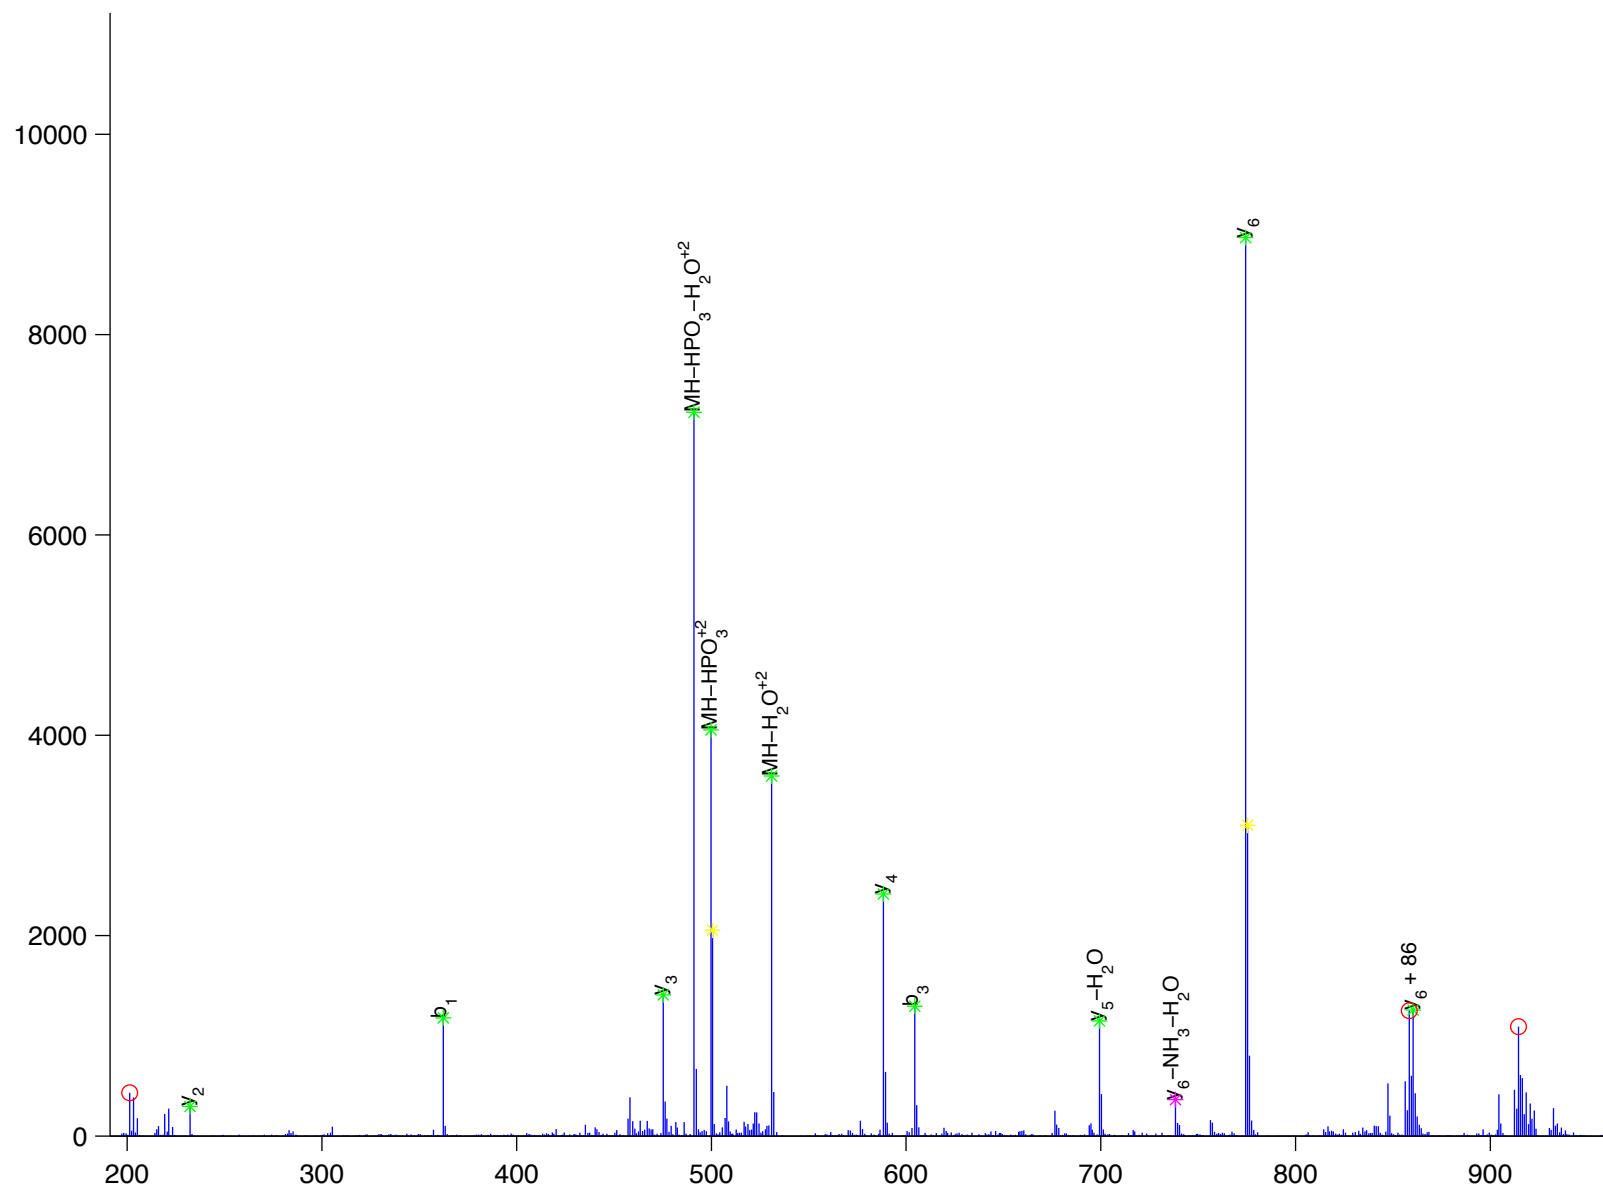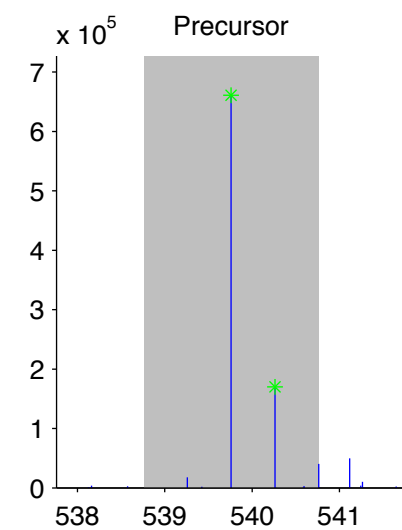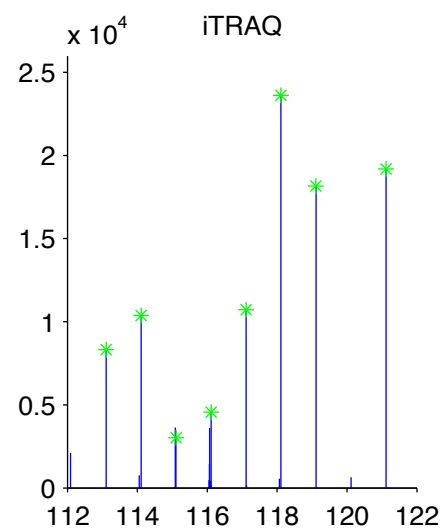

S [ L ] Y [ A ] S [ S ] P [ G ] G [ V ] y [ A ] T [ R ]

vimentin [Homo sapiens]

Charge State: +2

Scan Number: 5547

File Name: HJ050711\_GBMxeno\_bio1\_E\_HANNAH.raw

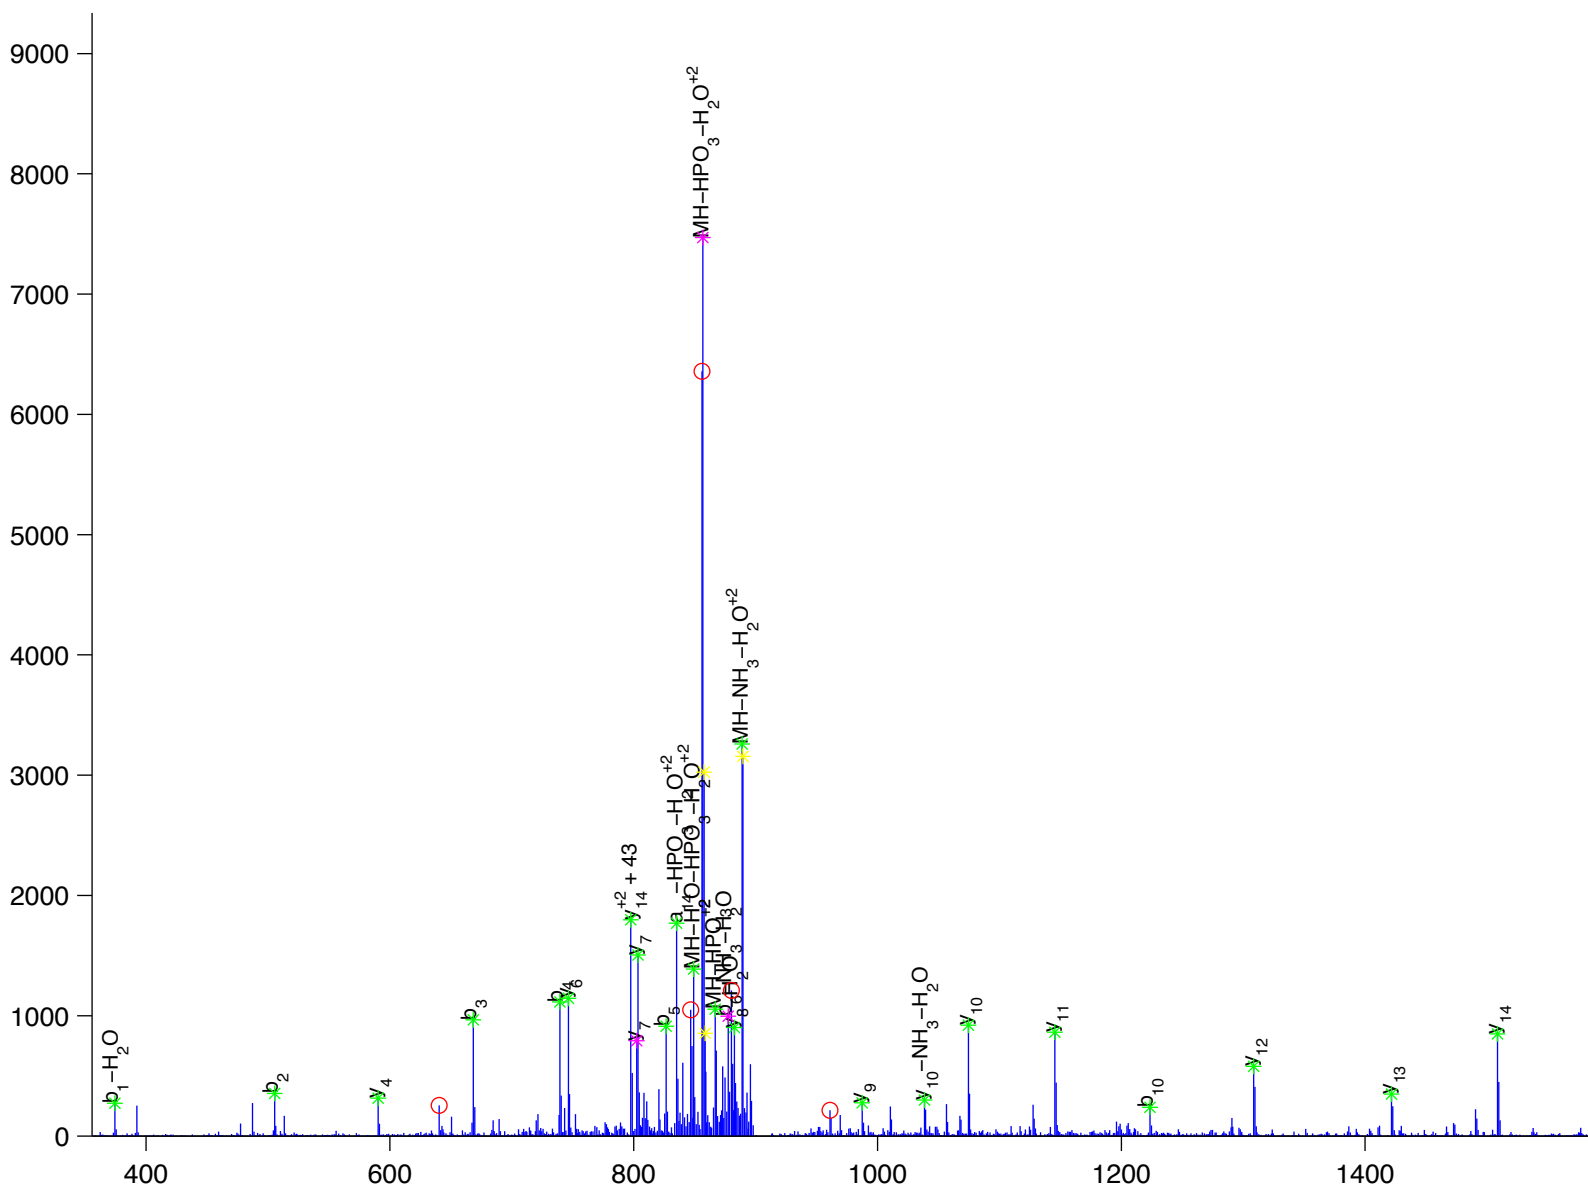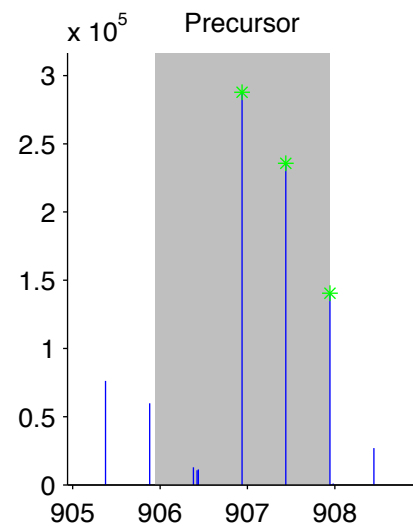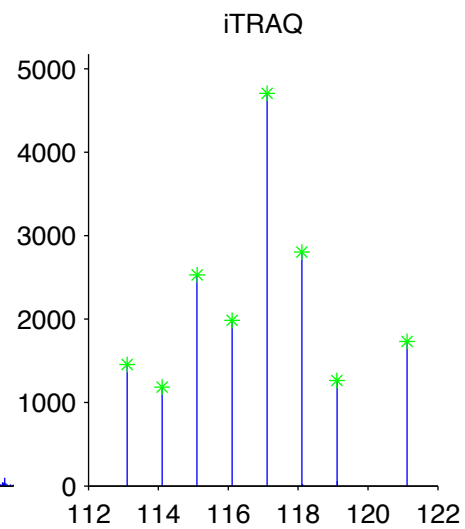

S [ L ] Y [ A ] S [ S ] P [ G ] G [ V ] y [ A ] T [ R ]

vimentin [Homo sapiens]

Charge State: +2

Scan Number: 5605

File Name: HJ050711\_GBMxeno\_bio1\_E\_HANNAH.raw

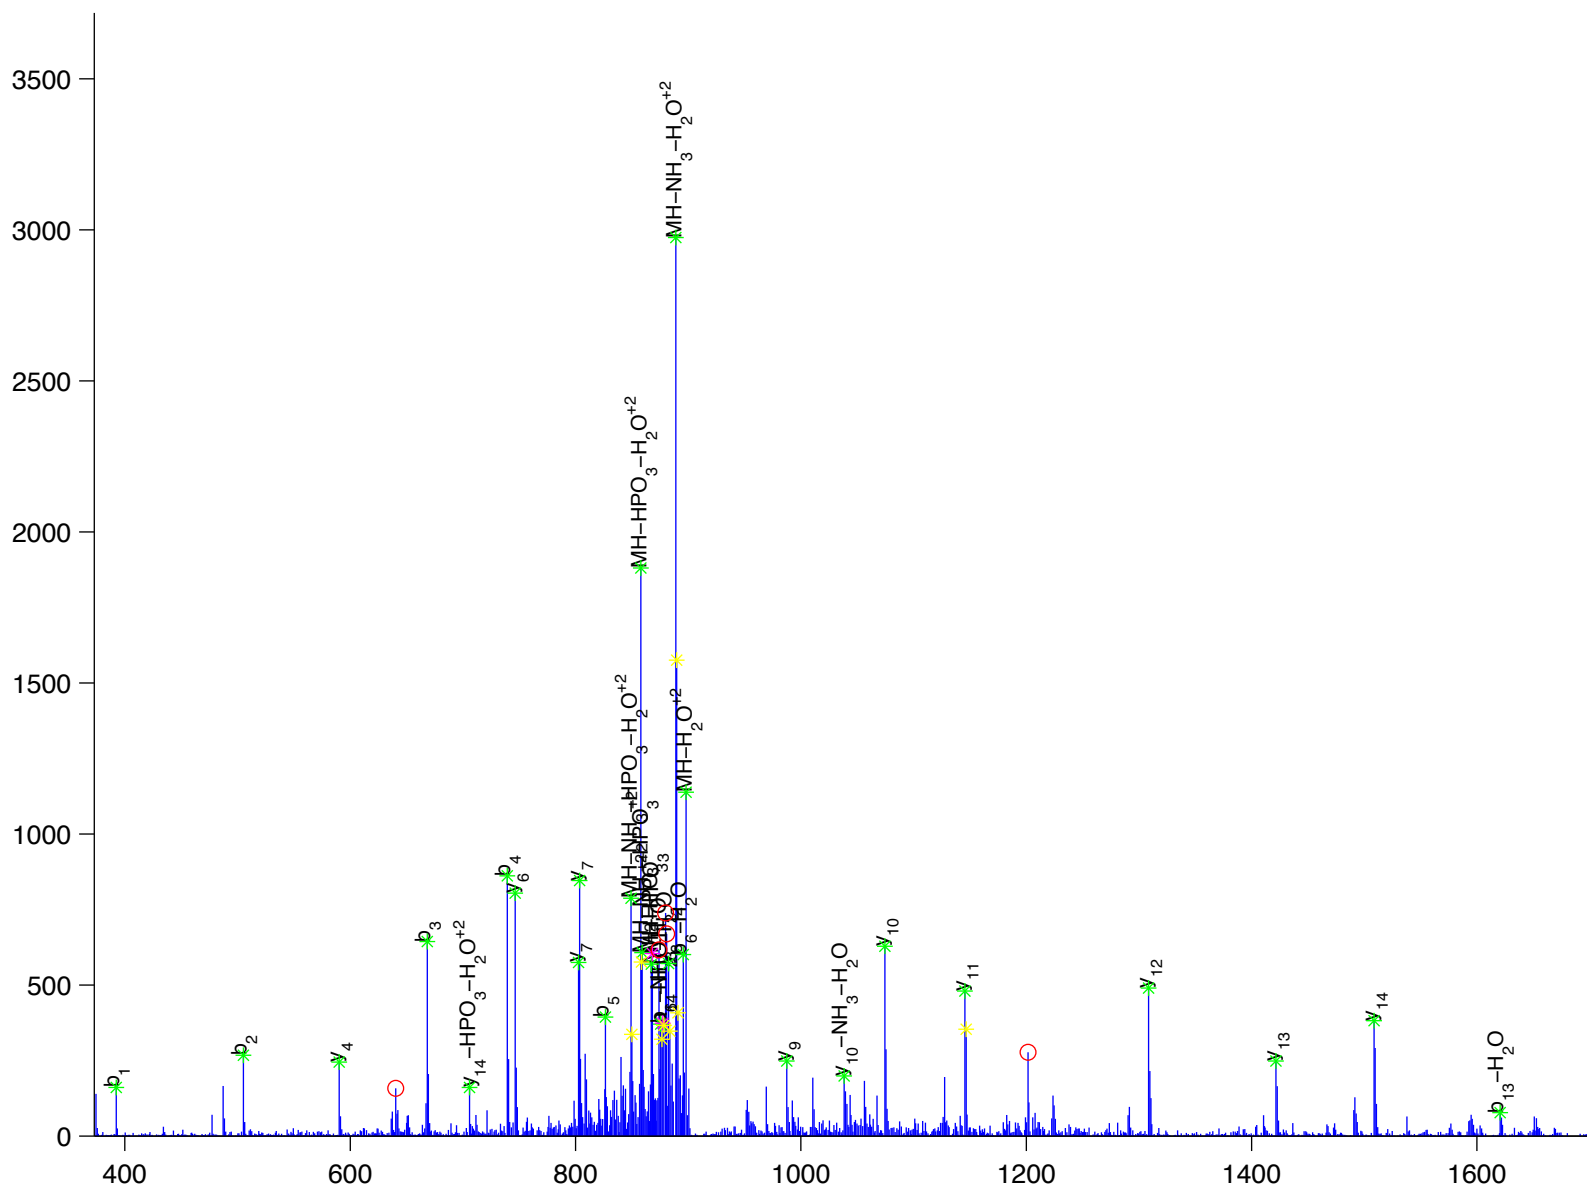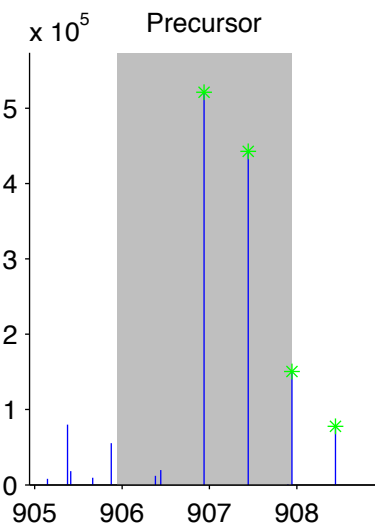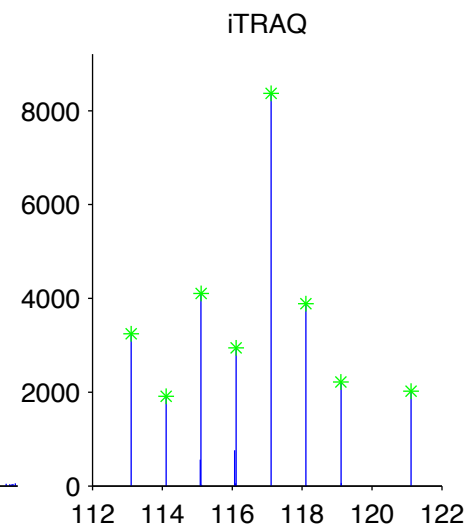

S [ F ] [ L ] [ D ] [ S ] [ G ] y [ R ]

vinculin isoform VCL [Homo sapiens]

Charge State: +2

Scan Number: 6311

File Name: HJ050711\_GBMxeno\_bio1\_E\_HANNAH.raw

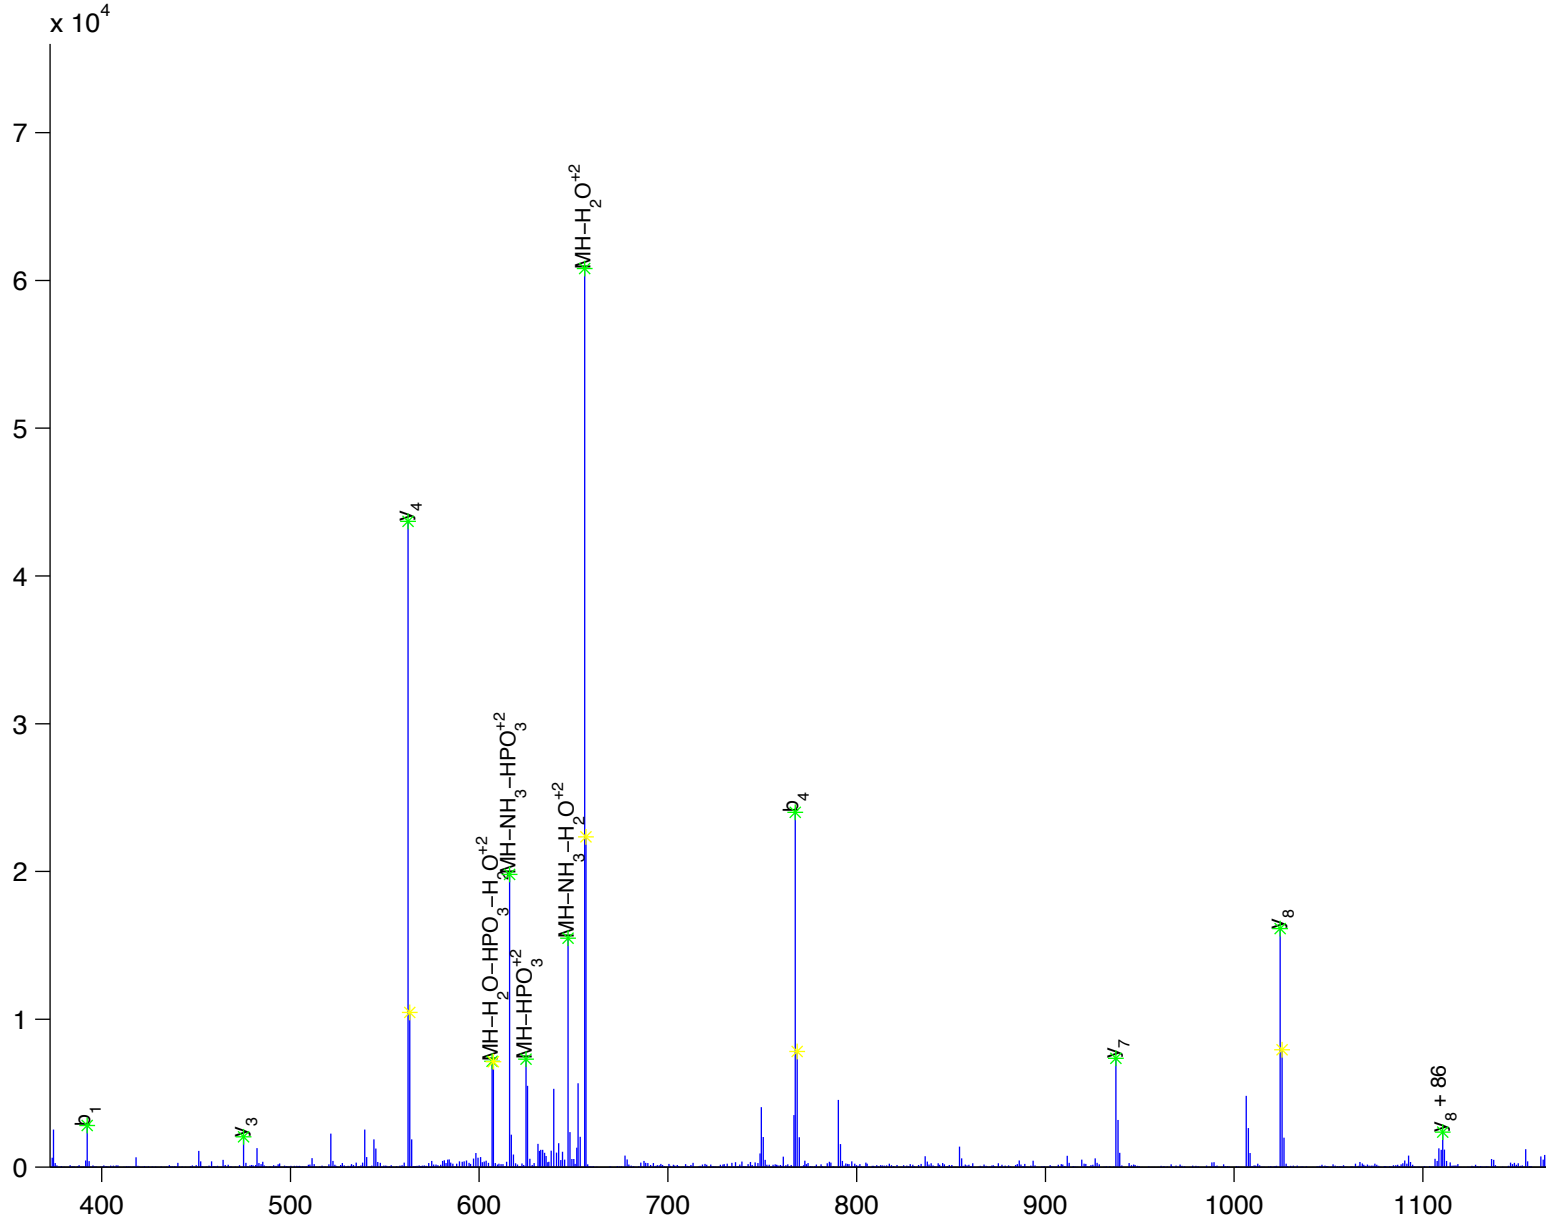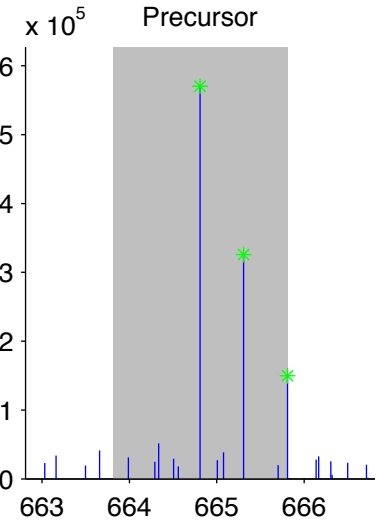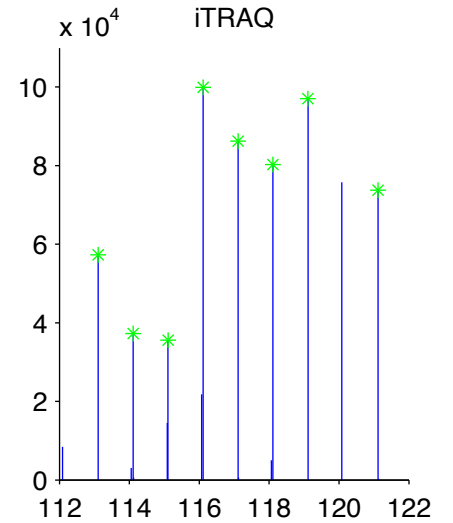

y [A] [G] [S] [A] [L] [Q] [Y] [E] [D] [V] [S] [T] [A] [V] [Q] [N] [L] [Q] [K]

Vps20-associated 1 homolog [Homo sapiens]

Charge State: +3

Scan Number: 8237

File Name: HJ050711\_GBMxeno\_bio1\_E\_HANNAH.raw

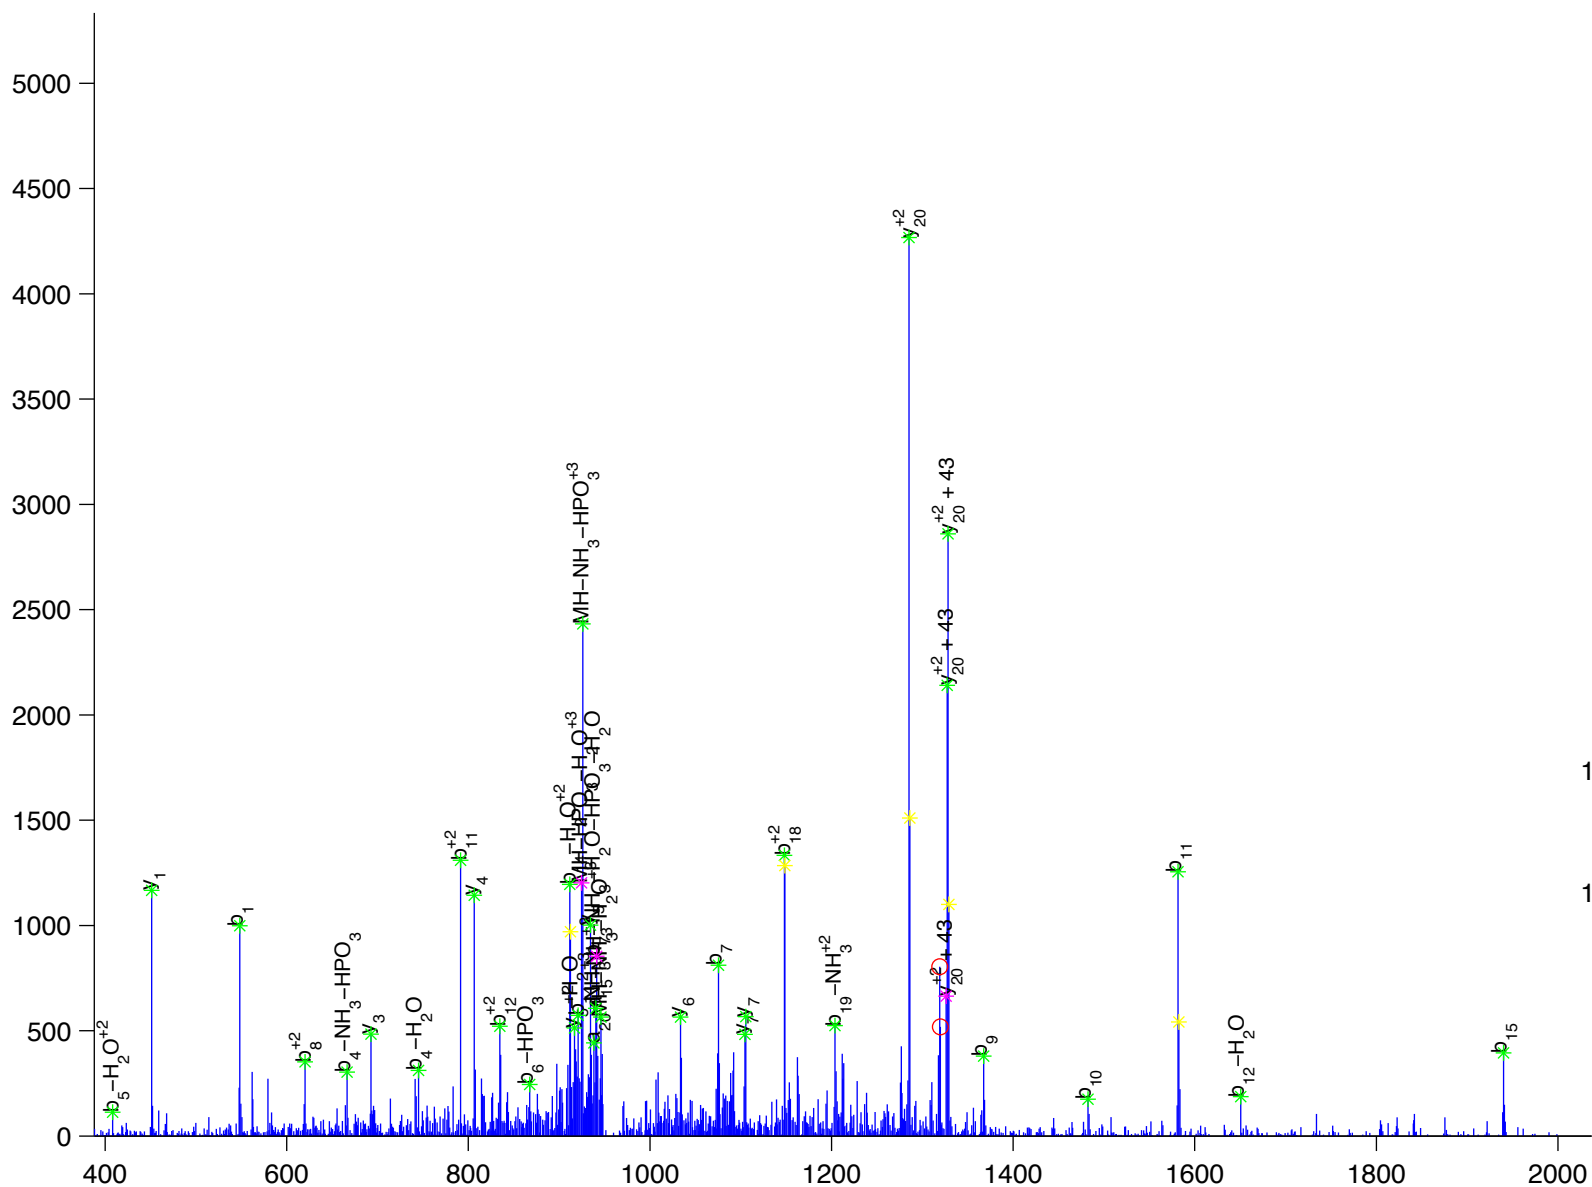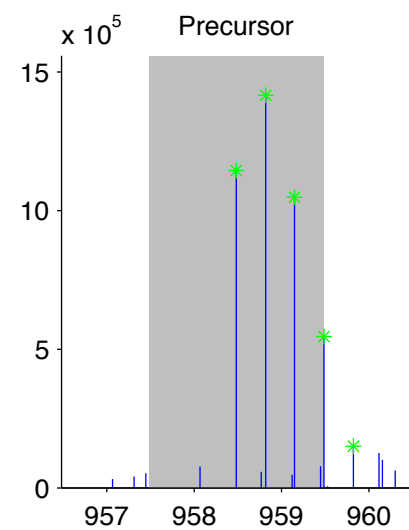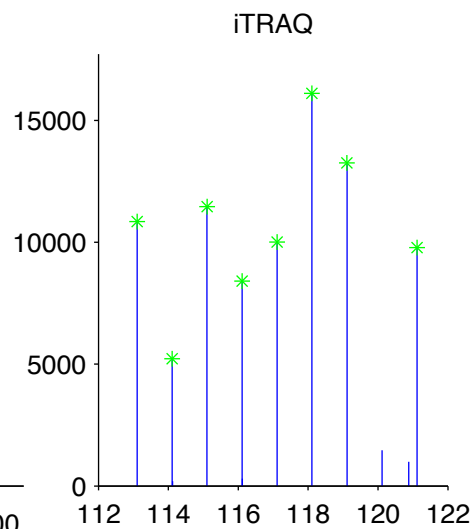

V I y D F I E K

Wiskott-Aldrich syndrome gene-like protein [Homo sapiens]

Charge State: +3

Scan Number: 9579

File Name: HJ050711\_GBMxeno\_bio1\_E\_HANNAH.raw

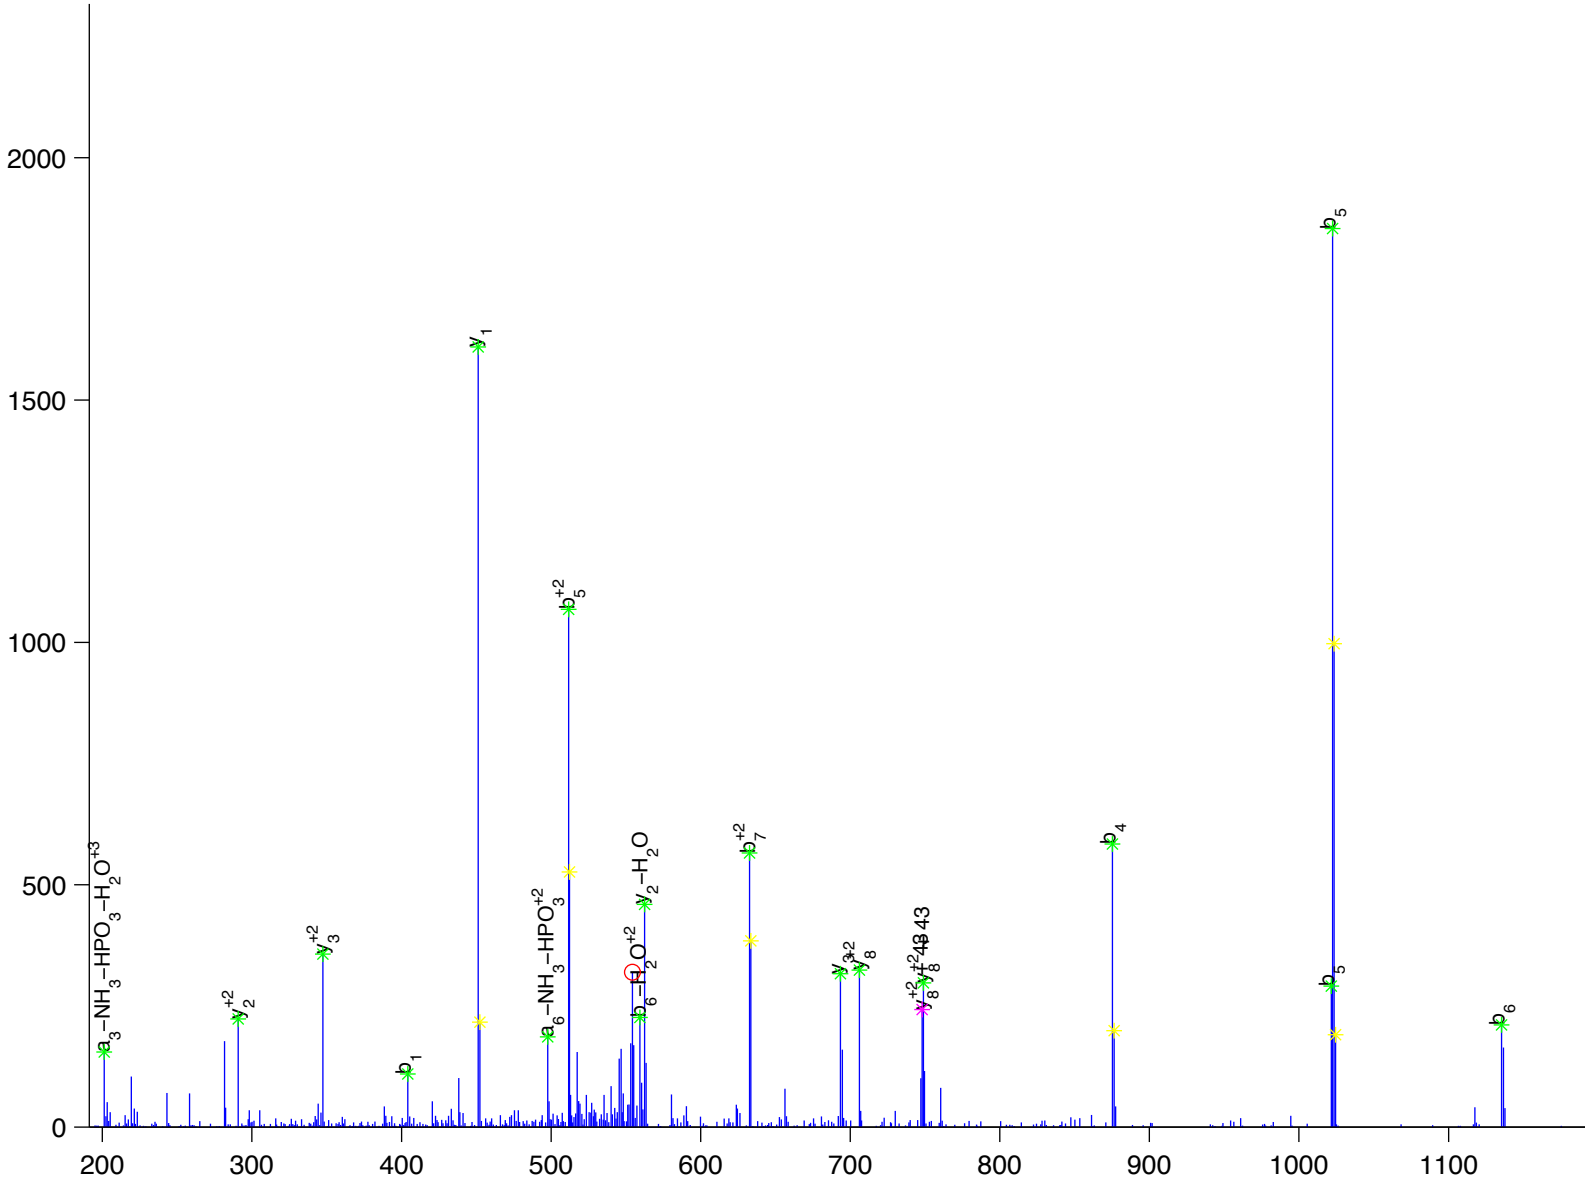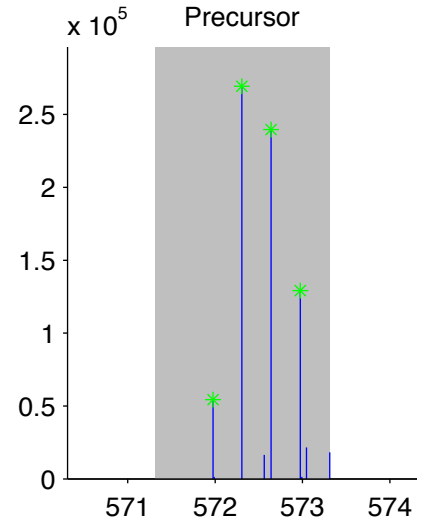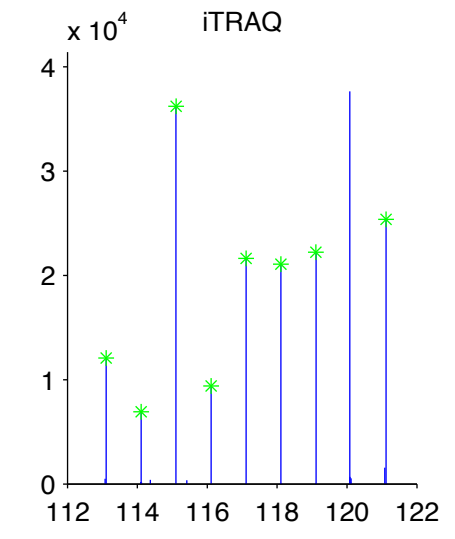

L I y D F I E D Q G G L E A V R

Wiskott-Aldrich syndrome protein [Homo sapiens]

Charge State: +2

Scan Number: 10209

File Name: HJ050711\_GBMxeno\_bio1\_E\_HANNAH.raw

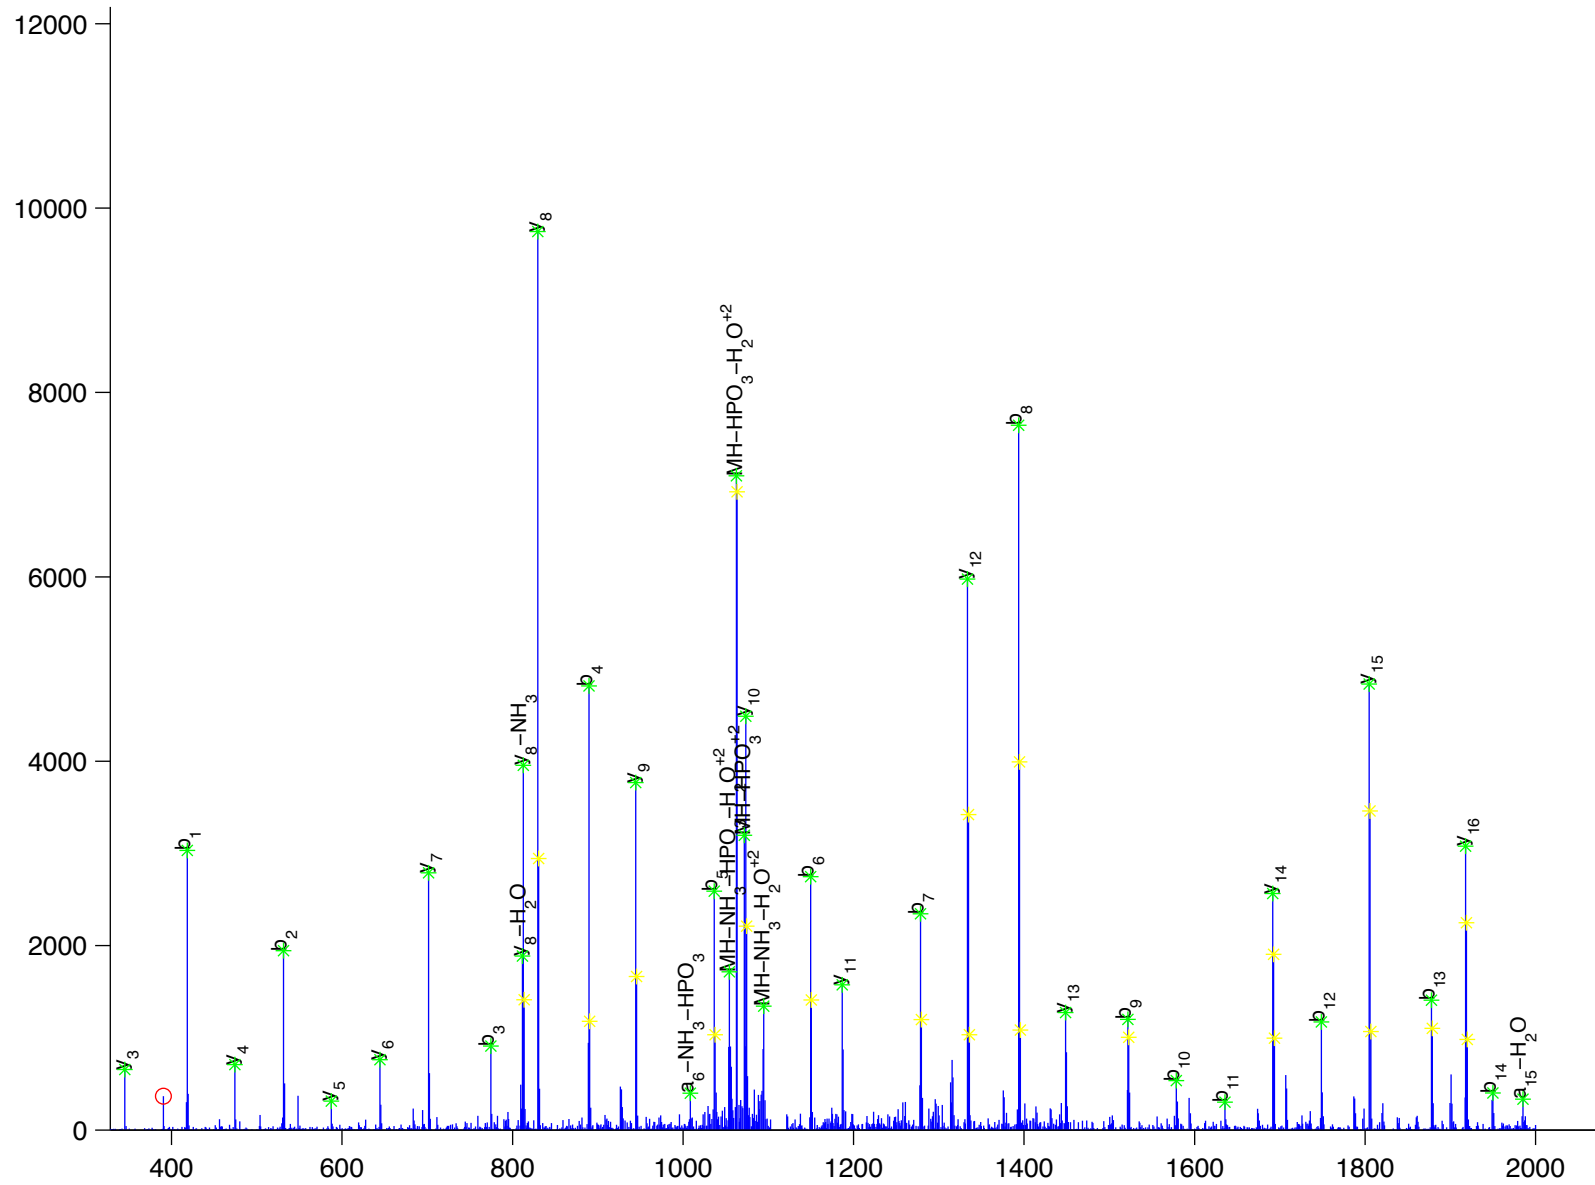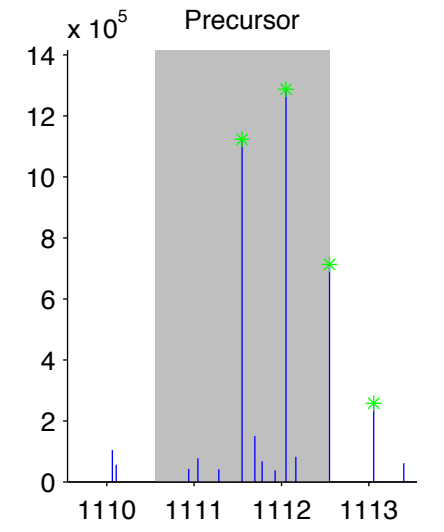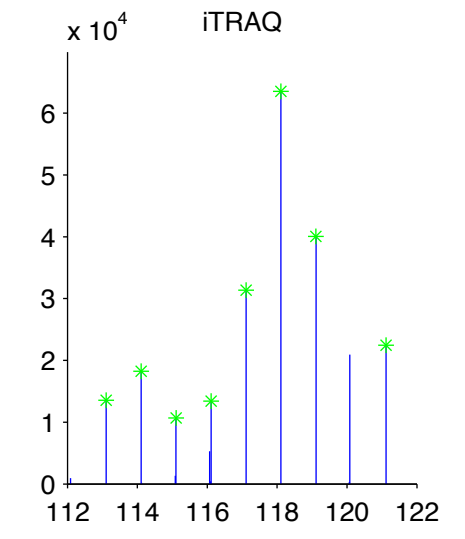



L I y D F I E D Q G G L E A V R

Wiskott-Aldrich syndrome protein [Homo sapiens]

Charge State: +3

Scan Number: 10211

File Name: HJ050711\_GBMxeno\_bio1\_E\_HANNAH.raw

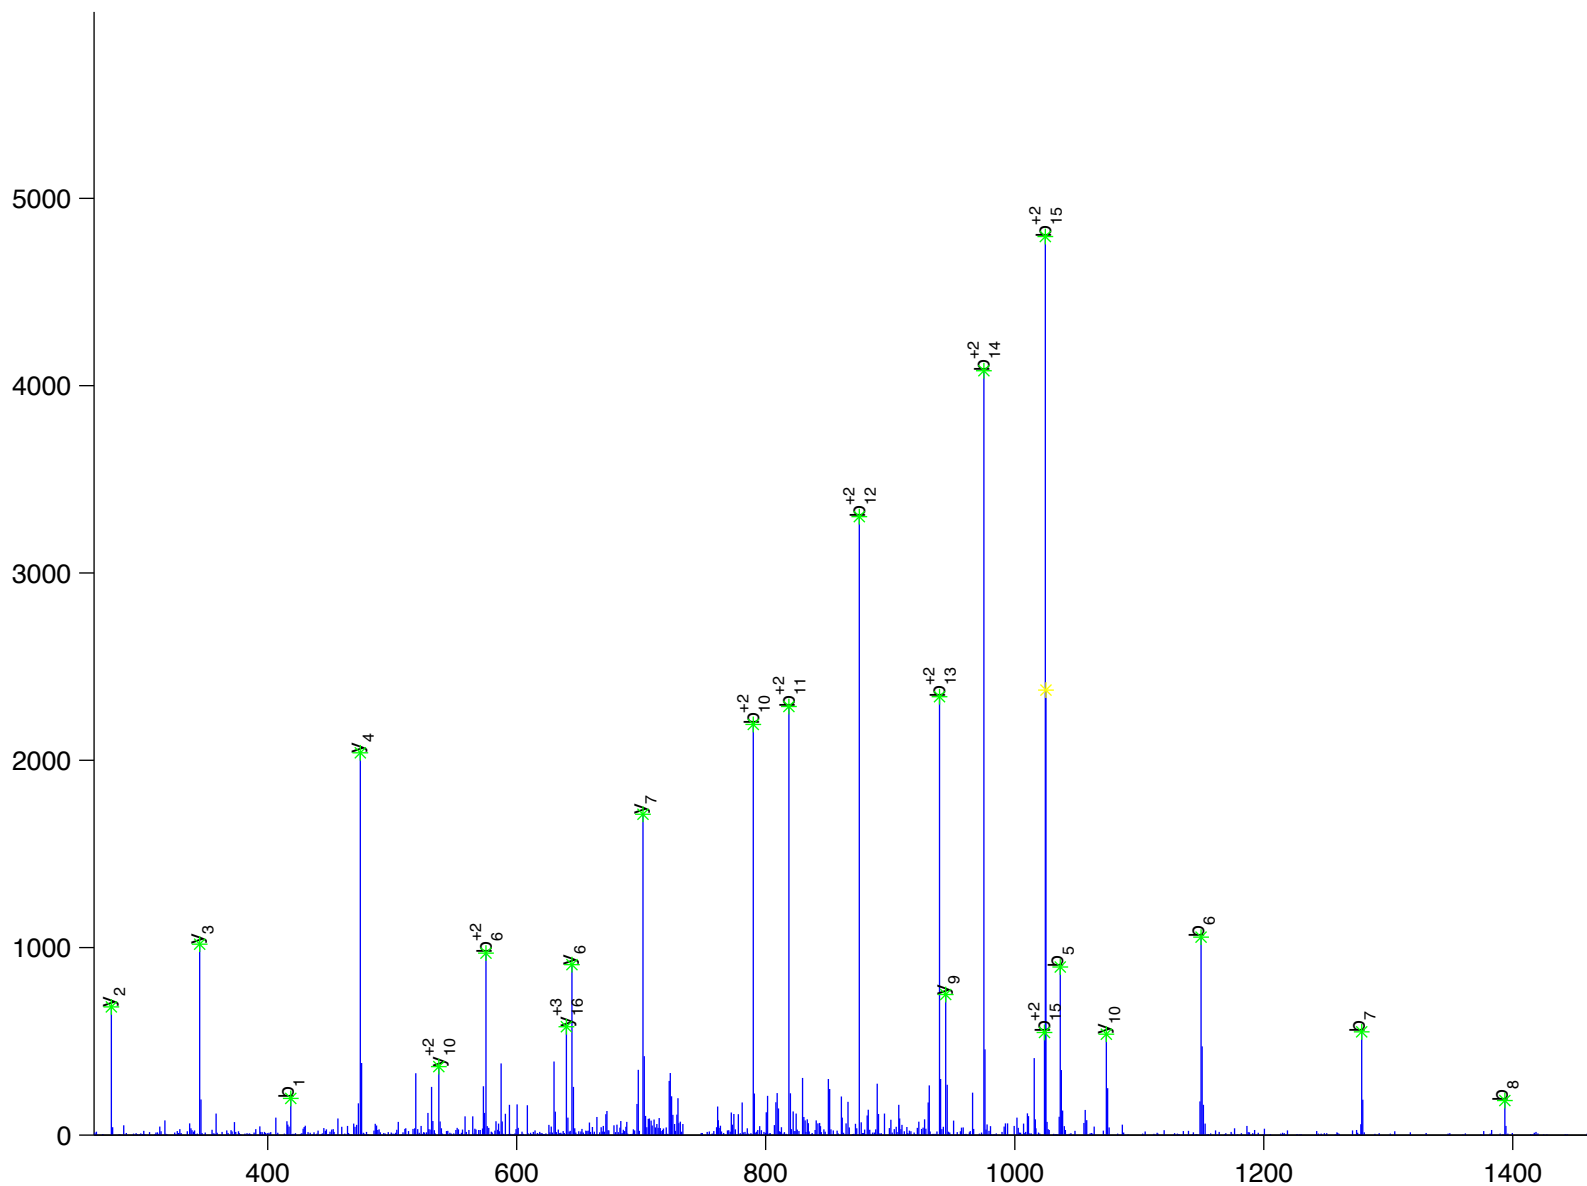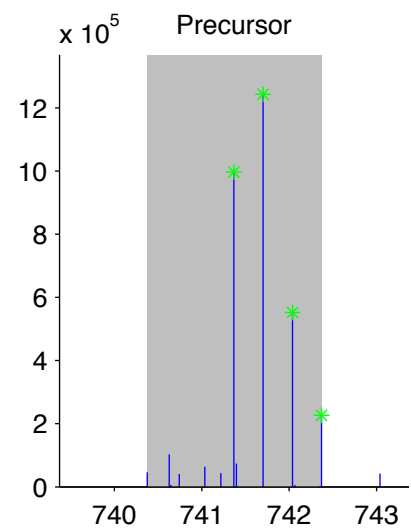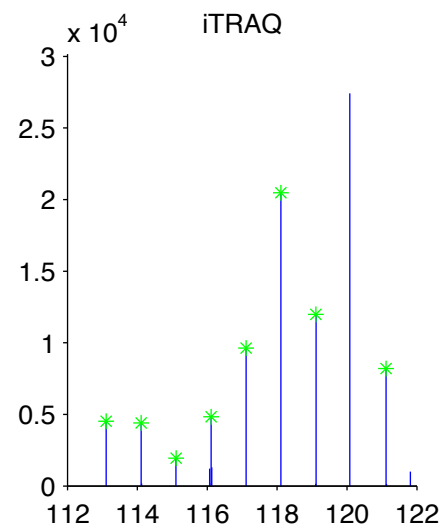

A [E] [E] [R] [P] [T] [F] [D] [Y] [L] [Q] [S] [V] [L] [D] [D] [F] [Y] [T] [A] [T] [E] [G] [Q] [y] [Q] [Q] [Q] [P]

Yamaguchi sarcoma viral (v-yes-1) oncogene homolog isoform A [Homo sapiens]

Charge State: +3

Scan Number: 10232

File Name: HJ050711\_GBMxeno\_bio1\_E\_HANNAH.raw

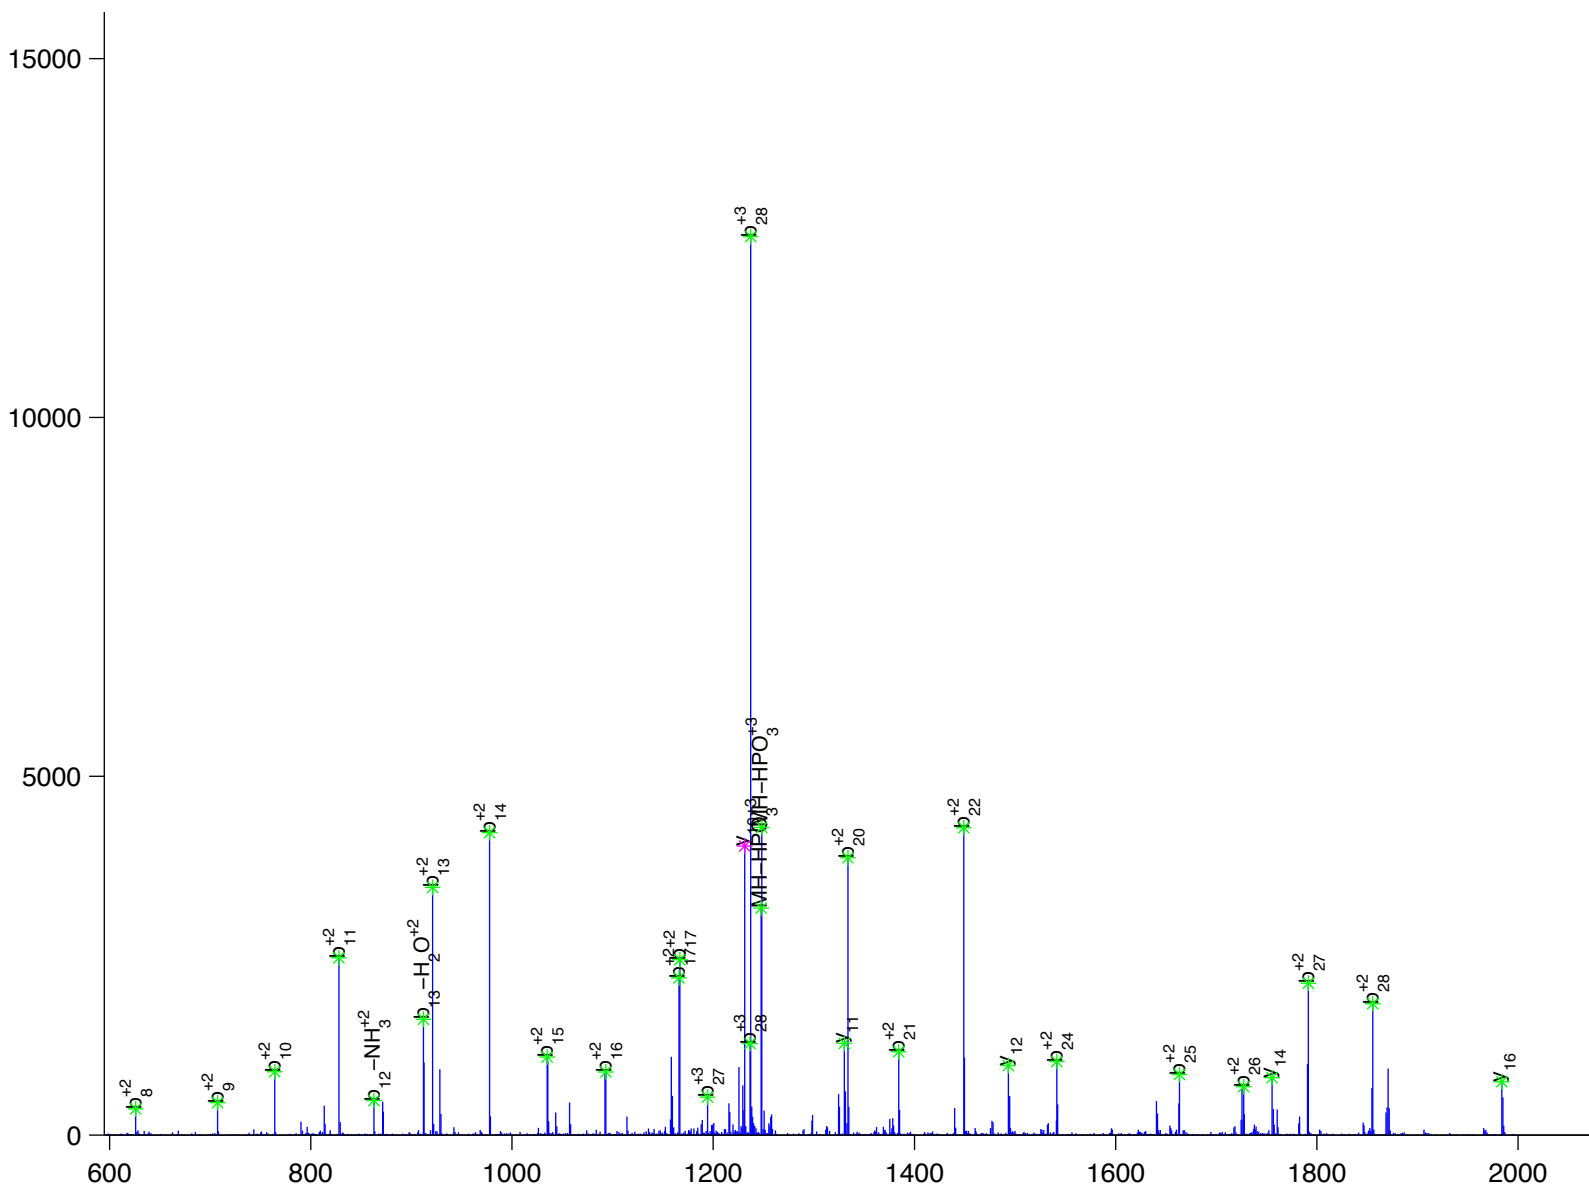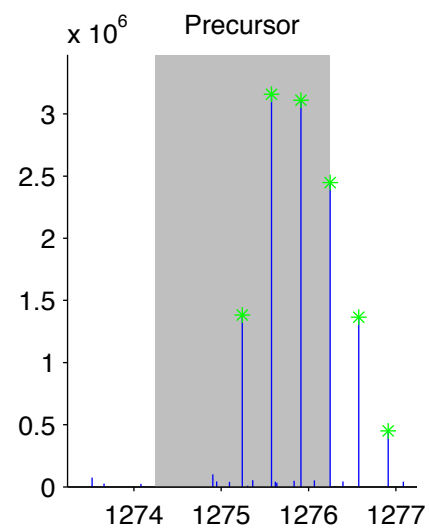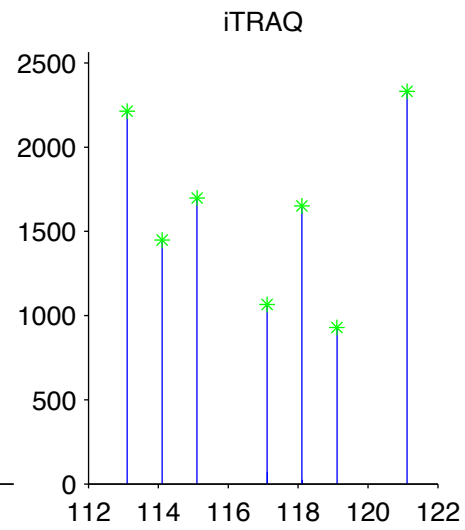

A[E]E[R]P[T]F[D]Y[L]Q[S]V[L]D[D]F[Y]T[A]T[E]G[Q]y[Q]Q[Q]P

Yamaguchi sarcoma viral (v-yes-1) oncogene homolog isoform A [Homo sapiens]

Charge State: +4

Scan Number: 10236

File Name: HJ050711\_GBMxeno\_bio1\_E\_HANNAH.raw

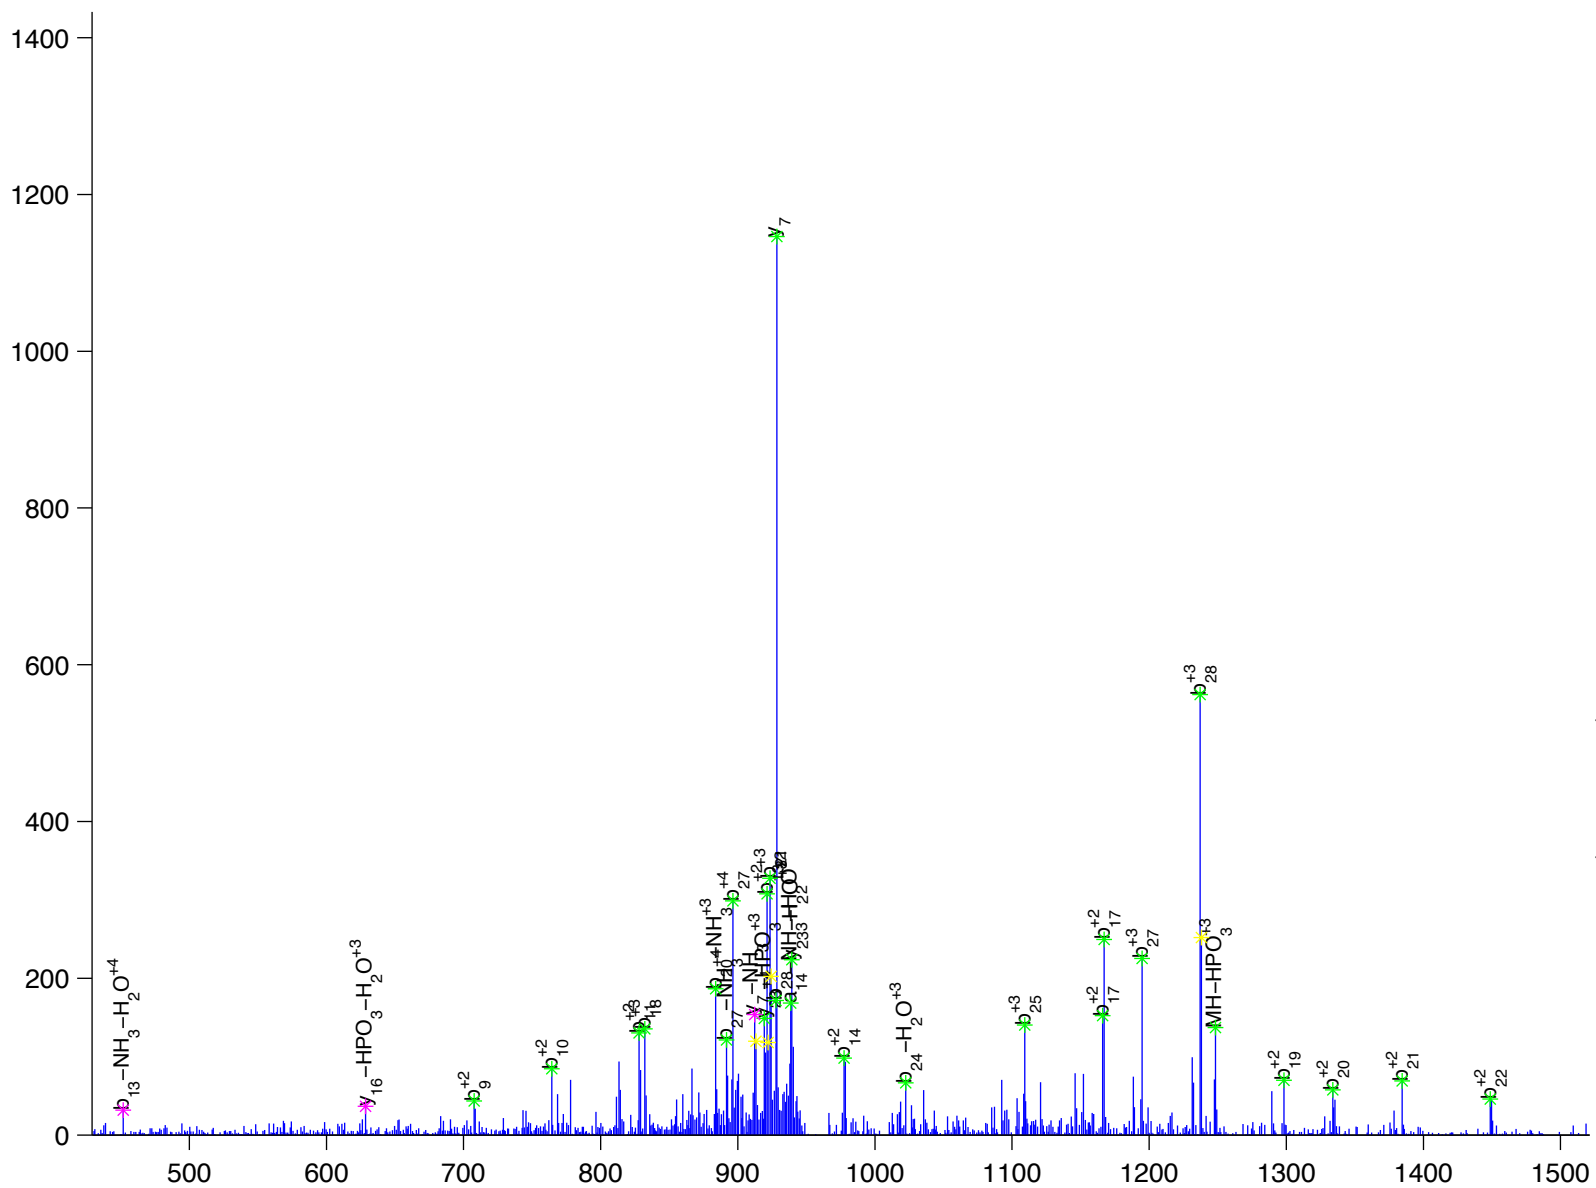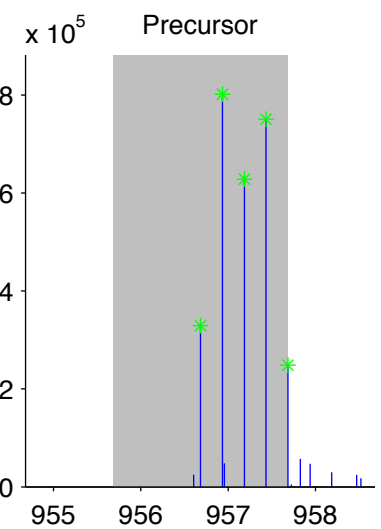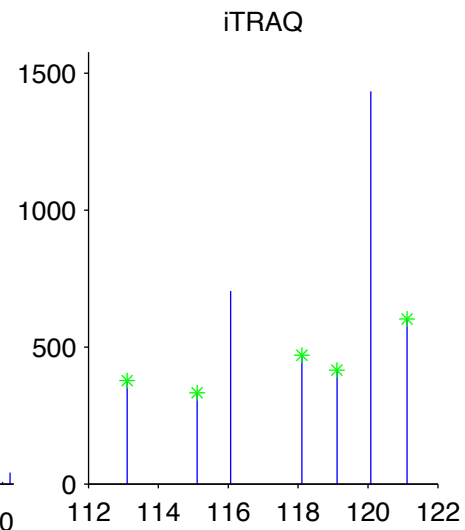

V I E D N E y T A R

Yamaguchi sarcoma viral (v-yes-1) oncogene homolog isoform A [Homo sapiens]

Charge State: +2

Scan Number: 4875

File Name: HJ050711\_GBMxeno\_bio1\_E\_HANNAH.raw

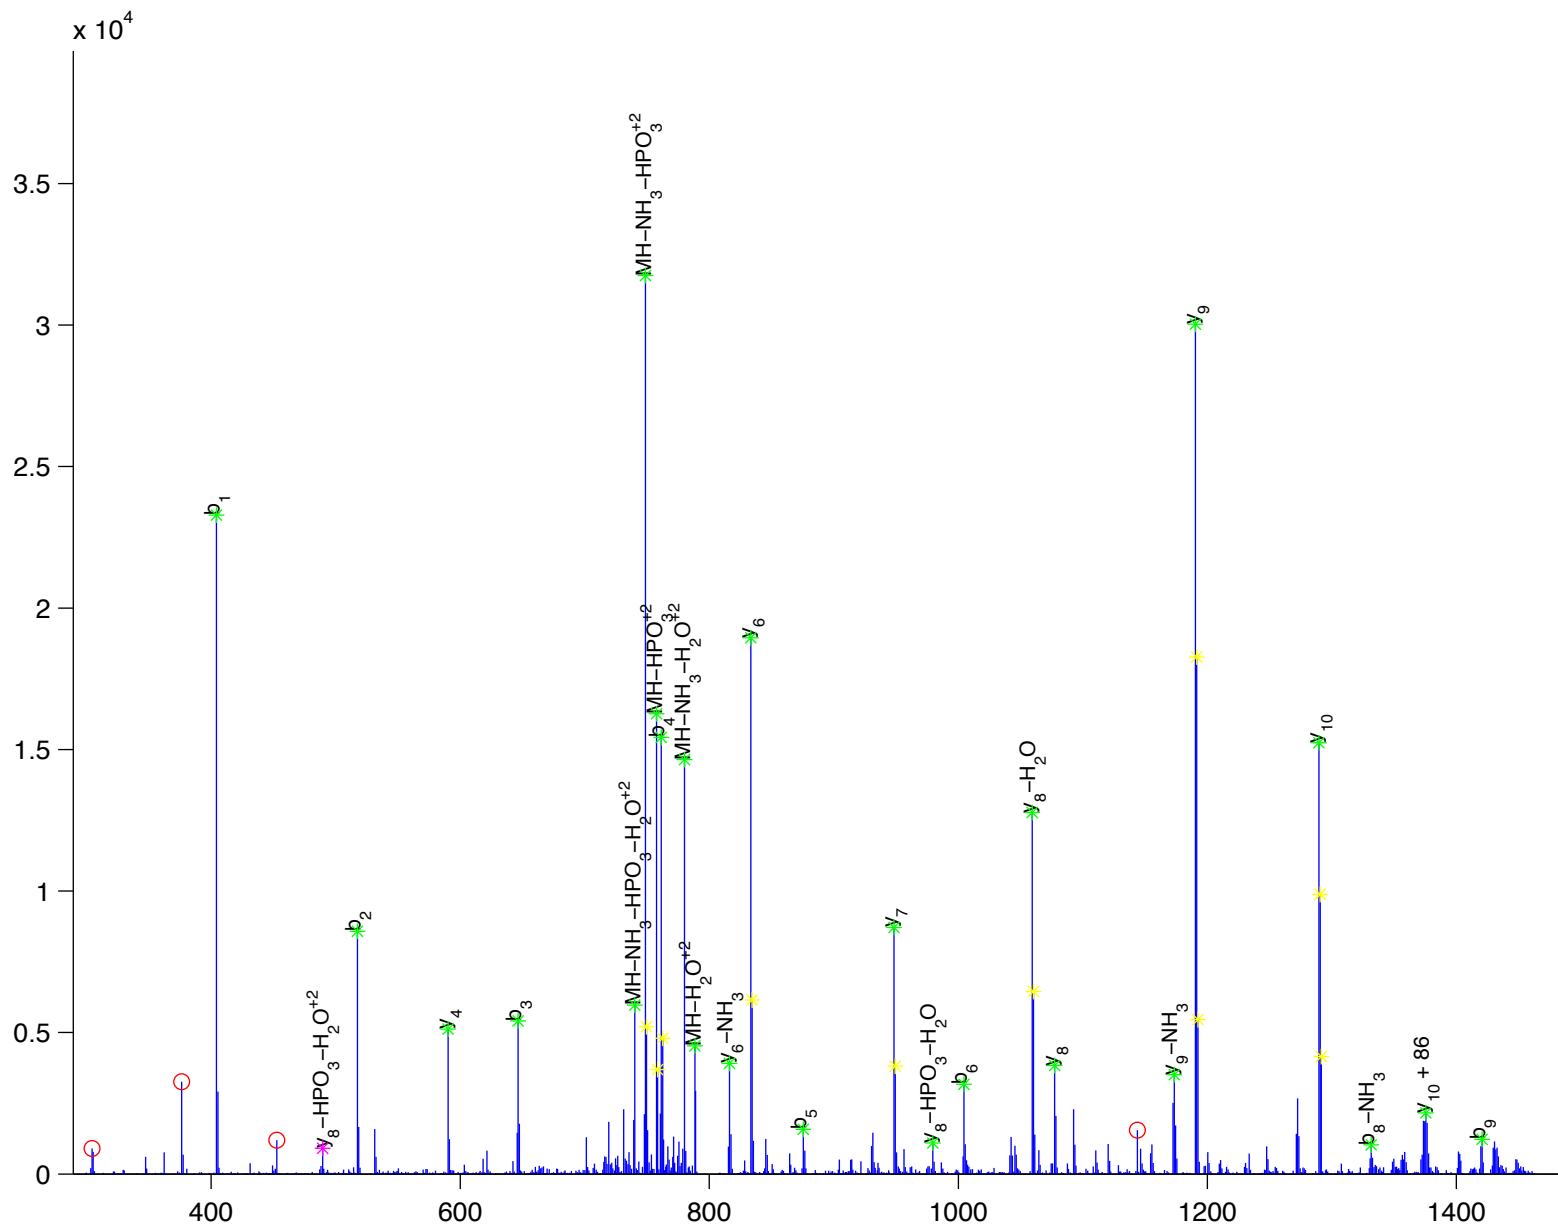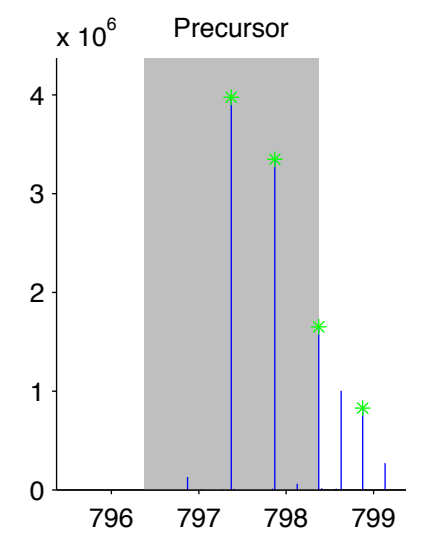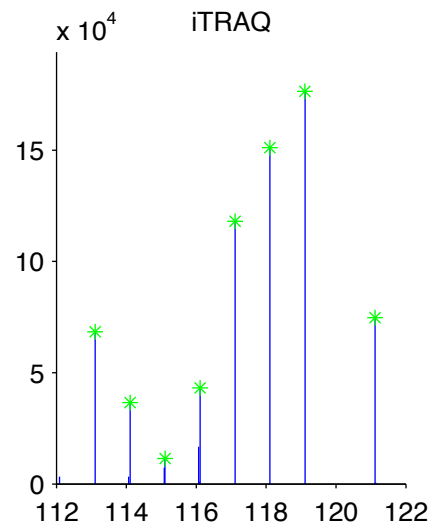

Supplement: NIHMS471062-supplement-06.pdf [file NIHMS471062-supplement-06.pdf]
